# Supplementary material for: Ordered dephosphorylation initiated by the selective proteolysis of cyclin B drives mitotic exit
Source: eLife. 2020 Sep 1;9:e59885. doi: 10.7554/eLife.59885 (PMC7529458; doi:10.7554/eLife.59885)
Supplement: Figure 2—source data 2. [file elife-59885-fig2-data2.xlsx]

## Sheet: Phospho-site MS Data
Proteins	Positions within proteins	Leading proteins	Protein	Protein names	Gene names	Fasta headers	Localization prob	Score diff	PEP	Score	Delta score	Number of Phospho (STY)	Amino acid	Sequence window	Modification window	Peptide window coverage	Phospho (STY) Probabilities	Phospho (STY) Score diffs	Position in peptide	Charge	Mass error [ppm]	Ratio H/L 01_0 min	Ratio H/L 01_01 min	Ratio H/L 01_02 min	Ratio H/L 01_03 min	Ratio H/L 01_04 min	Ratio H/L 01_05 min	Ratio H/L 01_07 min	Ratio H/L 01_08 min	Ratio H/L 01_09 min	Ratio H/L 01_10 min	Ratio H/L 01_15 min	Ratio H/L 01_20 min	Ratio H/L 01_25 min	Ratio H/L 01_30 min	Ratio H/L 02_0 min	Ratio H/L 02_01 min	Ratio H/L 02_02 min	Ratio H/L 02_03 min	Ratio H/L 02_04 min	Ratio H/L 02_05 min	Ratio H/L 02_06 min	Ratio H/L 02_07 min	Ratio H/L 02_08 min	Ratio H/L 02_09 min	Ratio H/L 02_10 min	Ratio H/L 02_15 min	Ratio H/L 02_20 min	Ratio H/L 02_25 min
A0A0J9YWL9	521	A0A0J9YWL9	A0A0J9YWL9			>sp|A0A0J9YWL9|TX13C_HUMAN Testis-expressed sequence 13C protein OS=Homo sapiens GN=TEX13C PE=5 SV=1	1	76.2215	0.00307227	76.221	6.1322	1	S	KKDLVVPKELVPLGDSKSHRMKKDPVMPQKM	X;X;X;X;X;X;X;X;X;X;X;X;X;X;X;Phospho (STY);X;X;X;X;X;X;X;X;X;X;X;X;X;X;X	XXXXXXXXPPPPPPPPPXXXXXXXXXXXXXX	ELVPLGDS(1)K	ELVPLGDS(76.22)K	8	2	-0.095891	0.75947
A0FGR8;A0FGR8-2;A0FGR8-5;A0FGR8-6	737;709;144;758	A0FGR8	A0FGR8	Extended synaptotagmin-2	ESYT2	>sp|A0FGR8|ESYT2_HUMAN Extended synaptotagmin-2 OS=Homo sapiens GN=ESYT2 PE=1 SV=1;>sp|A0FGR8-2|ESYT2_HUMAN Isoform 2 of Extended synaptotagmin-2 OS=Homo sapiens GN=ESYT2;>sp|A0FGR8-5|ESYT2_HUMAN Isoform 5 of Extended synaptotagmin-2 OS=Homo sapiens GN=ESY	0.376346	0.867678	0.00403632	76.78	39.603		S	PPEAGPQGLHDLGRSSSSLLASPGHISVKEP	X;X;X;X;X;X;X;X;X;X;X;X;X;X;X;Phospho (STY);X;X;X;X;X;Phospho (STY);X;X;X;X;X;X;X;X;X	XXXXXXXXXXXXXXPPPPPPPPPPPPPPPXX	S(0.007)S(0.376)S(0.308)S(0.308)LLAS(0.995)PGHIS(0.005)VK	S(-17.21)S(0.87)S(-0.87)S(-0.87)LLAS(23.33)PGHIS(-23.33)VK	2	2	0.72311
A0FGR8;A0FGR8-2;A0FGR8-5;A0FGR8-6	738;710;145;759	A0FGR8	A0FGR8	Extended synaptotagmin-2	ESYT2	>sp|A0FGR8|ESYT2_HUMAN Extended synaptotagmin-2 OS=Homo sapiens GN=ESYT2 PE=1 SV=1;>sp|A0FGR8-2|ESYT2_HUMAN Isoform 2 of Extended synaptotagmin-2 OS=Homo sapiens GN=ESYT2;>sp|A0FGR8-5|ESYT2_HUMAN Isoform 5 of Extended synaptotagmin-2 OS=Homo sapiens GN=ESY	0.352806	0.767082	0.000387361	100.45	44.695		S	PEAGPQGLHDLGRSSSSLLASPGHISVKEPT	X;X;X;X;X;X;X;X;X;X;X;X;X;X;X;Phospho (STY);X;X;X;X;Phospho (STY);X;X;X;X;X;X;X;X;X;X	XXXXXXXXXXXXXPPPPPPPPPPPPPPPXXX	S(0.048)S(0.297)S(0.353)S(0.304)LLAS(0.781)PGHIS(0.217)VK	S(-8.45)S(-0.77)S(0.77)S(-1.27)LLAS(5.05)PGHIS(-5.05)VK	3	2	0.43199
A0FGR8;A0FGR8-2;A0FGR8-5;A0FGR8-6	739;711;146;760	A0FGR8	A0FGR8	Extended synaptotagmin-2	ESYT2	>sp|A0FGR8|ESYT2_HUMAN Extended synaptotagmin-2 OS=Homo sapiens GN=ESYT2 PE=1 SV=1;>sp|A0FGR8-2|ESYT2_HUMAN Isoform 2 of Extended synaptotagmin-2 OS=Homo sapiens GN=ESYT2;>sp|A0FGR8-5|ESYT2_HUMAN Isoform 5 of Extended synaptotagmin-2 OS=Homo sapiens GN=ESY	0.999996	53.6385	0.000113587	272.94	190.27	2	S	EAGPQGLHDLGRSSSSLLASPGHISVKEPTP	X;X;X;X;X;X;X;X;X;X;X;X;X;X;X;Phospho (STY);X;X;X;Phospho (STY);X;X;X;X;X;X;X;X;X;X;X	XXXXXXXXXXXXPPPPPPPPPPPPPPPXXXX	SSSS(1)LLAS(1)PGHISVK	S(-73.67)S(-73.67)S(-53.64)S(53.64)LLAS(155.75)PGHIS(-155.75)VK	4	3	0.022863					0.98213	1.5092	1.7603		0.50745						0.6053	0.53755	0.54596		0.2706	0.48858	0.68221	0.39649	0.71497
A0FGR8;A0FGR8-2;A0FGR8-5;A0FGR8-6	743;715;150;764	A0FGR8	A0FGR8	Extended synaptotagmin-2	ESYT2	>sp|A0FGR8|ESYT2_HUMAN Extended synaptotagmin-2 OS=Homo sapiens GN=ESYT2 PE=1 SV=1;>sp|A0FGR8-2|ESYT2_HUMAN Isoform 2 of Extended synaptotagmin-2 OS=Homo sapiens GN=ESYT2;>sp|A0FGR8-5|ESYT2_HUMAN Isoform 5 of Extended synaptotagmin-2 OS=Homo sapiens GN=ESY	1	122.057	5.4256e-07	357.39	357.39	1;2	S	QGLHDLGRSSSSLLASPGHISVKEPTPSIAS	X;X;X;X;X;X;X;X;Phospho (STY);Phospho (STY);Phospho (STY);Phospho (STY);X;X;X;Phospho (STY);X;X;X;X;Phospho (STY);X;X;X;X;X;X;X;X;X;X	XXXXXXXXPPPPPPPPPPPPPPPXXXXXXXX	SSSSLLAS(1)PGHIS(1)VK	S(-183.21)S(-183.21)S(-157.23)S(-122.06)LLAS(122.06)PGHIS(200.04)VK	8	3	-0.059379	0.88179	0.65849	0.39862	1.6938	0.8103	1.1327	2.1806	0.98598	0.96854	0.76159	0.68108	0.50375	0.30798		0.58761	0.60472	0.6062	0.44126	1.5119	0.48858	0.95182	0.71134	0.60147	0.71675	0.86286	0.51504	0.7099
A0FGR8;A0FGR8-2;A0FGR8-5;A0FGR8-6	748;720;155;769	A0FGR8	A0FGR8	Extended synaptotagmin-2	ESYT2	>sp|A0FGR8|ESYT2_HUMAN Extended synaptotagmin-2 OS=Homo sapiens GN=ESYT2 PE=1 SV=1;>sp|A0FGR8-2|ESYT2_HUMAN Isoform 2 of Extended synaptotagmin-2 OS=Homo sapiens GN=ESYT2;>sp|A0FGR8-5|ESYT2_HUMAN Isoform 5 of Extended synaptotagmin-2 OS=Homo sapiens GN=ESY	1	200.043	0.000679392	290.38	214.7	1;2	S	LGRSSSSLLASPGHISVKEPTPSIASDISLP	X;X;X;X;X;X;X;X;X;X;Phospho (STY);X;X;X;X;Phospho (STY);X;X;X;X;X;X;X;X;X;X;X;X;X;X;X	XXXPPPPPPPPPPPPPPPXXXXXXXXXXXXX	SSSSLLAS(1)PGHIS(1)VK	S(-183.21)S(-183.21)S(-157.23)S(-122.06)LLAS(122.06)PGHIS(200.04)VK	13	3	-0.059379
A0JNW5	1066	A0JNW5	A0JNW5	UHRF1-binding protein 1-like	UHRF1BP1L	>sp|A0JNW5|UH1BL_HUMAN UHRF1-binding protein 1-like OS=Homo sapiens GN=UHRF1BP1L PE=1 SV=2	0.996469	26.2068	0.000170206	72.578	57.734	2	S	DLLPEAASLSENLDISKEETPPVRTLKSQSS	X;X;X;X;X;X;X;X;X;X;X;X;X;X;X;Phospho (STY);X;X;X;Phospho (STY);X;X;X;X;X;X;X;X;X;X;X	PPPPPPPPPPPPPPPPPPPPPPPPXXXXXXX	AEDLLPEAAS(0.001)LS(0.003)ENLDIS(0.996)KEET(1)PPVR	AEDLLPEAAS(-30.37)LS(-26.21)ENLDIS(26.21)KEET(36.36)PPVR	18	3	0.4179
A0MZ66;A0MZ66-7;A0MZ66-5;A0MZ66-6	619;207;559;589	A0MZ66	A0MZ66	Shootin-1	KIAA1598	>sp|A0MZ66|SHOT1_HUMAN Shootin-1 OS=Homo sapiens GN=SHTN1 PE=1 SV=4;>sp|A0MZ66-7|SHOT1_HUMAN Isoform 7 of Shootin-1 OS=Homo sapiens GN=SHTN1;>sp|A0MZ66-5|SHOT1_HUMAN Isoform 5 of Shootin-1 OS=Homo sapiens GN=SHTN1;>sp|A0MZ66-6|SHOT1_HUMAN Isoform 6 of Shoo	1	115.384	7.86102e-14	126.62	106.93	1	S	HKEDEGEIQPENKEDSIENVRETDSSNC___	X;X;X;X;X;X;X;X;X;X;X;X;X;X;X;Phospho (STY);X;X;X;X;X;X;X;X;X;X;X;X;X;X;X	XXPPPPPPPPPPPPPPPPPPPPPPPPPPXXX	EDEGEIQPENKEDS(1)IENVR	EDEGEIQPENKEDS(115.38)IENVR	14	3	0.20488	1.028		0.71195	1.4999	0.96847		1.0426		1.0199	0.89263	0.99078	0.93858			1.0236	1.4448	0.90358	1.0684	1.5794	1.6905	0.91015	1.6244	1.2915	1.0233	1.18		1.3746
A0MZ66;A0MZ66-7;A0MZ66-5;A0MZ66-6	628;216;568;598	A0MZ66	A0MZ66	Shootin-1	KIAA1598	>sp|A0MZ66|SHOT1_HUMAN Shootin-1 OS=Homo sapiens GN=SHTN1 PE=1 SV=4;>sp|A0MZ66-7|SHOT1_HUMAN Isoform 7 of Shootin-1 OS=Homo sapiens GN=SHTN1;>sp|A0MZ66-5|SHOT1_HUMAN Isoform 5 of Shootin-1 OS=Homo sapiens GN=SHTN1;>sp|A0MZ66-6|SHOT1_HUMAN Isoform 6 of Shoo	0.339119	0	0.00269448	48.597	33.638		S	PENKEDSIENVRETDSSNC____________	X;X;X;X;X;X;Phospho (STY);X;X;X;X;X;X;X;X;Phospho (STY);X;X;X;X;X;X;X;X;X;X;X;X;X;X;X	PPPPPPPPPPPPPPPPPPPXXXXXXXXXXXX	EDEGEIQPENKEDS(0.11)IENVRET(0.212)DS(0.339)S(0.339)NC	EDEGEIQPENKEDS(-4.9)IENVRET(-2.04)DS(0)S(0)NC	23	3	-0.073585
A0MZ66;A0MZ66-7;A0MZ66-5;A0MZ66-6	629;217;569;599	A0MZ66	A0MZ66	Shootin-1	KIAA1598	>sp|A0MZ66|SHOT1_HUMAN Shootin-1 OS=Homo sapiens GN=SHTN1 PE=1 SV=4;>sp|A0MZ66-7|SHOT1_HUMAN Isoform 7 of Shootin-1 OS=Homo sapiens GN=SHTN1;>sp|A0MZ66-5|SHOT1_HUMAN Isoform 5 of Shootin-1 OS=Homo sapiens GN=SHTN1;>sp|A0MZ66-6|SHOT1_HUMAN Isoform 6 of Shoo	0.339119	0	0.00269448	48.597	33.638		S	ENKEDSIENVRETDSSNC_____________	X;X;X;X;X;Phospho (STY);X;X;X;X;X;X;X;X;X;X;X;X;X;X;X;X;X;X;X;X;X;X;X;X;X	XXXXXXXXXXXXXXXXXXXXXXXXXXXXXXX	EDEGEIQPENKEDS(0.11)IENVRET(0.212)DS(0.339)S(0.339)NC	EDEGEIQPENKEDS(-4.9)IENVRET(-2.04)DS(0)S(0)NC	24	3	-0.073585
A0MZ66;A0MZ66-7;A0MZ66-5;A0MZ66-6;A0MZ66-8;A0MZ66-4;A0MZ66-3	512;100;452;482;452;512;512	A0MZ66	A0MZ66	Shootin-1	KIAA1598	>sp|A0MZ66|SHOT1_HUMAN Shootin-1 OS=Homo sapiens GN=SHTN1 PE=1 SV=4;>sp|A0MZ66-7|SHOT1_HUMAN Isoform 7 of Shootin-1 OS=Homo sapiens GN=SHTN1;>sp|A0MZ66-5|SHOT1_HUMAN Isoform 5 of Shootin-1 OS=Homo sapiens GN=SHTN1;>sp|A0MZ66-6|SHOT1_HUMAN Isoform 6 of Shoo	0.841741	9.57775	3.04796e-09	137.27	137.27	1	S	GILATSESKSMPVLGSVSSVTKTALNKKTLE	X;X;X;X;X;X;X;X;X;X;X;X;X;X;X;Phospho (STY);X;X;X;X;X;X;X;X;X;X;X;X;Phospho (STY);X;X	XXXXXXXXXPPPPPPPPPPPPPXXXXXXXXX	SMPVLGS(0.842)VS(0.093)S(0.064)VT(0.001)K	S(-69.04)MPVLGS(9.58)VS(-9.58)S(-11.17)VT(-28.34)K	7	2	-0.15396
A0MZ66;A0MZ66-7;A0MZ66-5;A0MZ66-6;A0MZ66-8;A0MZ66-4;A0MZ66-3	514;102;454;484;454;514;514	A0MZ66	A0MZ66	Shootin-1	KIAA1598	>sp|A0MZ66|SHOT1_HUMAN Shootin-1 OS=Homo sapiens GN=SHTN1 PE=1 SV=4;>sp|A0MZ66-7|SHOT1_HUMAN Isoform 7 of Shootin-1 OS=Homo sapiens GN=SHTN1;>sp|A0MZ66-5|SHOT1_HUMAN Isoform 5 of Shootin-1 OS=Homo sapiens GN=SHTN1;>sp|A0MZ66-6|SHOT1_HUMAN Isoform 6 of Shoo	0.807321	6.931	1.83755e-12	163.9	126.3	1	S	LATSESKSMPVLGSVSSVTKTALNKKTLEAE	X;X;X;X;X;X;X;X;X;X;X;X;X;X;X;Phospho (STY);X;X;X;X;X;X;X;X;X;X;Phospho (STY);X;X;X;X	XXXXXXXPPPPPPPPPPPPPXXXXXXXXXXX	SMPVLGS(0.027)VS(0.807)S(0.164)VT(0.002)K	S(-119.03)MPVLGS(-14.75)VS(6.93)S(-6.93)VT(-26.06)K	9	2	-0.061292
A0MZ66;A0MZ66-7;A0MZ66-5;A0MZ66-6;A0MZ66-8;A0MZ66-4;A0MZ66-3	515;103;455;485;455;515;515	A0MZ66	A0MZ66	Shootin-1	KIAA1598	>sp|A0MZ66|SHOT1_HUMAN Shootin-1 OS=Homo sapiens GN=SHTN1 PE=1 SV=4;>sp|A0MZ66-7|SHOT1_HUMAN Isoform 7 of Shootin-1 OS=Homo sapiens GN=SHTN1;>sp|A0MZ66-5|SHOT1_HUMAN Isoform 5 of Shootin-1 OS=Homo sapiens GN=SHTN1;>sp|A0MZ66-6|SHOT1_HUMAN Isoform 6 of Shoo	0.977452	18.4504	5.71788e-28	176.17	125.08	1	S	ATSESKSMPVLGSVSSVTKTALNKKTLEAEF	X;X;X;X;X;X;X;X;X;X;X;X;X;X;X;Phospho (STY);X;X;X;X;X;X;X;X;X;Phospho (STY);X;X;X;X;X	XXXXXXPPPPPPPPPPPPPXXXXXXXXXXXX	SMPVLGSVS(0.014)S(0.977)VT(0.008)K	S(-127.53)MPVLGS(-34.78)VS(-18.45)S(18.45)VT(-20.73)K	10	2	0.48695	1.0535	0.58636			0.36976												0.82345		0.26326
A0MZ66;A0MZ66-7;A0MZ66-5;A0MZ66-6;A0MZ66-8;A0MZ66-4;A0MZ66-3	532;120;472;502;472;532;532	A0MZ66	A0MZ66	Shootin-1	KIAA1598	>sp|A0MZ66|SHOT1_HUMAN Shootin-1 OS=Homo sapiens GN=SHTN1 PE=1 SV=4;>sp|A0MZ66-7|SHOT1_HUMAN Isoform 7 of Shootin-1 OS=Homo sapiens GN=SHTN1;>sp|A0MZ66-5|SHOT1_HUMAN Isoform 5 of Shootin-1 OS=Homo sapiens GN=SHTN1;>sp|A0MZ66-6|SHOT1_HUMAN Isoform 6 of Shoo	0.999434	33.1146	1.44596e-05	110.03	83.058	1;2;3	S	TKTALNKKTLEAEFNSPSPPTPEPGEGPRKL	Phospho (STY);X;X;X;X;X;X;X;Phospho (STY);X;X;X;X;X;X;Phospho (STY);X;Phospho (STY);X;X;Phospho (STY);X;X;X;X;X;X;X;X;X;X	XXXXXXXXPPPPPPPPPPPPPPPPPPPPPPX	T(0.001)LEAEFNS(0.999)PS(0.987)PPT(0.013)PEPGEGPRK	T(-33.11)LEAEFNS(33.11)PS(18.7)PPT(-18.7)PEPGEGPRK	8	3	0.54788	1.0181	0.73877	0.53551	0.71149	0.61163	0.81713	0.81687	0.5756	0.19439	0.119		0.45641	0.51815		0.91086	0.55028		0.49381	0.59011	0.58793	0.69607	0.62092	0.62136	0.62122	0.42087	0.19711	0.1397	0.10907
A0MZ66;A0MZ66-7;A0MZ66-5;A0MZ66-6;A0MZ66-8;A0MZ66-4;A0MZ66-3	534;122;474;504;474;534;534	A0MZ66	A0MZ66	Shootin-1	KIAA1598	>sp|A0MZ66|SHOT1_HUMAN Shootin-1 OS=Homo sapiens GN=SHTN1 PE=1 SV=4;>sp|A0MZ66-7|SHOT1_HUMAN Isoform 7 of Shootin-1 OS=Homo sapiens GN=SHTN1;>sp|A0MZ66-5|SHOT1_HUMAN Isoform 5 of Shootin-1 OS=Homo sapiens GN=SHTN1;>sp|A0MZ66-6|SHOT1_HUMAN Isoform 6 of Shoo	0.999442	32.5014	1.46179e-05	90.946	69.597	1;2;3	S	TALNKKTLEAEFNSPSPPTPEPGEGPRKLEG	X;X;X;X;X;X;Phospho (STY);X;X;X;X;X;X;Phospho (STY);X;Phospho (STY);X;X;Phospho (STY);X;X;X;X;X;X;X;X;X;X;X;X	XXXXXXPPPPPPPPPPPPPPPPPPPPPPXXX	T(0.007)LEAEFNS(0.994)PS(0.999)PPT(0.999)PEPGEGPR	T(-22.14)LEAEFNS(22.14)PS(32.5)PPT(32.35)PEPGEGPR	10	3	-0.16146	0.95636		0.41992	0.68955	0.60619	0.64405	0.59784		0.52046	0.54076	0.60719	0.45641	0.51815	0.51948	0.98702	0.64699		0.71997	0.59011	0.4914	0.48661	0.60743	0.50225	0.33277	0.57136	0.29393	0.58687	0.67111
A0MZ66;A0MZ66-7;A0MZ66-5;A0MZ66-6;A0MZ66-8;A0MZ66-4;A0MZ66-3	492;80;432;462;432;492;492	A0MZ66	A0MZ66	Shootin-1	KIAA1598	>sp|A0MZ66|SHOT1_HUMAN Shootin-1 OS=Homo sapiens GN=SHTN1 PE=1 SV=4;>sp|A0MZ66-7|SHOT1_HUMAN Isoform 7 of Shootin-1 OS=Homo sapiens GN=SHTN1;>sp|A0MZ66-5|SHOT1_HUMAN Isoform 5 of Shootin-1 OS=Homo sapiens GN=SHTN1;>sp|A0MZ66-6|SHOT1_HUMAN Isoform 6 of Shoo	0.441932	0	0.000208451	100.02	100.02		S	LERILRRRKVTAEADSSSPTGILATSESKSM	X;X;X;X;X;X;X;X;X;X;X;X;X;X;X;Phospho (STY);X;X;X;X;X;X;X;X;X;X;X;X;X;X;X	XXXXXXXXXPPPPPPPPPPPPPPPPPPPPXX	VTAEADS(0.442)S(0.442)S(0.058)PT(0.058)GILATSESK	VT(-46.77)AEADS(0)S(0)S(-8.82)PT(-8.82)GILAT(-34.98)S(-51.49)ES(-59.08)K	7	3	-0.57142
A0MZ66;A0MZ66-7;A0MZ66-5;A0MZ66-6;A0MZ66-8;A0MZ66-4;A0MZ66-3	493;81;433;463;433;493;493	A0MZ66	A0MZ66	Shootin-1	KIAA1598	>sp|A0MZ66|SHOT1_HUMAN Shootin-1 OS=Homo sapiens GN=SHTN1 PE=1 SV=4;>sp|A0MZ66-7|SHOT1_HUMAN Isoform 7 of Shootin-1 OS=Homo sapiens GN=SHTN1;>sp|A0MZ66-5|SHOT1_HUMAN Isoform 5 of Shootin-1 OS=Homo sapiens GN=SHTN1;>sp|A0MZ66-6|SHOT1_HUMAN Isoform 6 of Shoo	0.933043	13.9194	3.32482e-68	212	188.13	1	S	ERILRRRKVTAEADSSSPTGILATSESKSMP	X;X;X;X;X;X;X;X;X;X;X;X;X;X;X;Phospho (STY);X;X;X;X;X;X;X;X;X;X;X;X;X;X;X	XXXXXXXXPPPPPPPPPPPPPPPPPPPPXXX	VTAEADS(0.038)S(0.933)S(0.029)PTGILATSESK	VT(-101.35)AEADS(-13.92)S(13.92)S(-15.13)PT(-33.13)GILAT(-59.08)S(-57.07)ES(-63.4)K	8	2	-0.087832			0.38885														0.61147				0.5703
A0MZ66;A0MZ66-7;A0MZ66-5;A0MZ66-6;A0MZ66-8;A0MZ66-4;A0MZ66-3	494;82;434;464;434;494;494	A0MZ66	A0MZ66	Shootin-1	KIAA1598	>sp|A0MZ66|SHOT1_HUMAN Shootin-1 OS=Homo sapiens GN=SHTN1 PE=1 SV=4;>sp|A0MZ66-7|SHOT1_HUMAN Isoform 7 of Shootin-1 OS=Homo sapiens GN=SHTN1;>sp|A0MZ66-5|SHOT1_HUMAN Isoform 5 of Shootin-1 OS=Homo sapiens GN=SHTN1;>sp|A0MZ66-6|SHOT1_HUMAN Isoform 6 of Shoo	0.995107	23.798	5.60343e-280	313.39	269.33	1	S	RILRRRKVTAEADSSSPTGILATSESKSMPV	X;X;X;X;X;X;X;X;X;X;X;X;X;X;X;Phospho (STY);X;X;X;X;X;X;X;X;X;X;X;X;X;X;X	XXXXXXXPPPPPPPPPPPPPPPPPPPPXXXX	VTAEADSS(0.004)S(0.995)PTGILATSESK	VT(-78.26)AEADS(-35.25)S(-23.8)S(23.8)PT(-34.09)GILAT(-48.03)S(-46.36)ES(-47.2)K	9	2	0.31883	0.95291	0.57663	0.37985	0.6744	0.57654	0.79726	0.7084	0.76736	0.74014	0.79785	0.6788	0.55506	0.64629	0.58207	0.73225	0.7338	0.69473	0.62294	0.52086	0.60669	0.63866	0.69802	0.74126	0.62387	0.72341	0.57921	0.70662	0.43513
A1A4S6	591	A1A4S6	A1A4S6	Rho GTPase-activating protein 10	ARHGAP10	>sp|A1A4S6|RHG10_HUMAN Rho GTPase-activating protein 10 OS=Homo sapiens GN=ARHGAP10 PE=1 SV=1	0.97644	16.5729	0.000355343	69.581	46.646	1	S	TPPDTTFPEPTCLSASPPNAPPRQSKRQGQR	X;X;X;X;X;X;X;X;X;X;X;X;X;X;X;Phospho (STY);X;X;X;X;X;X;X;X;X;X;X;X;X;X;X	PPPPPPPPPPPPPPPPPPPPPPPXXXXXXXX	TPPDTTFPEPT(0.001)CLS(0.021)AS(0.976)PPNAPPR	T(-33.74)PPDT(-33.74)T(-33.97)FPEPT(-30.61)CLS(-16.57)AS(16.57)PPNAPPR	16	3	0.59885	0.97451								0.842	0.70621	0.70341				0.73009	0.72324				0.50946	0.48001			0.59867
A1L390;A1L390-3	76;76	A1L390	A1L390	Pleckstrin homology domain-containing family G member 3	PLEKHG3	>sp|A1L390|PKHG3_HUMAN Pleckstrin homology domain-containing family G member 3 OS=Homo sapiens GN=PLEKHG3 PE=1 SV=1;>sp|A1L390-3|PKHG3_HUMAN Isoform 3 of Pleckstrin homology domain-containing family G member 3 OS=Homo sapiens GN=PLEKHG3	0.999999	59.2942	0.000185598	116.24	69.419	1	S	SNNNSSSWLNVKGPLSPFNSRAAAGPAHHKL	X;X;X;X;X;X;X;X;X;X;X;X;X;X;X;Phospho (STY);X;X;X;X;X;X;X;X;X;X;X;X;X;X;X	XXXXXXXXXXXXPPPPPPPPPXXXXXXXXXX	GPLS(1)PFNSR	GPLS(59.29)PFNS(-59.29)R	4	2	-0.3023	0.85431		0.433					0.73451	0.63444	0.42733					0.63896	0.64114	0.73395		0.54089	0.48891		0.68911	0.58526
A1L390;A1L390-3	80;80	A1L390	A1L390	Pleckstrin homology domain-containing family G member 3	PLEKHG3	>sp|A1L390|PKHG3_HUMAN Pleckstrin homology domain-containing family G member 3 OS=Homo sapiens GN=PLEKHG3 PE=1 SV=1;>sp|A1L390-3|PKHG3_HUMAN Isoform 3 of Pleckstrin homology domain-containing family G member 3 OS=Homo sapiens GN=PLEKHG3	0.803625	6.11968	0.00144982	93.839	63.835	1	S	SSSWLNVKGPLSPFNSRAAAGPAHHKLSYLG	X;X;X;X;X;X;X;X;X;X;X;X;X;X;X;Phospho (STY);X;X;X;X;X;X;X;X;X;X;X;X;X;X;X	XXXXXXXXPPPPPPPPPXXXXXXXXXXXXXX	GPLS(0.196)PFNS(0.804)R	GPLS(-6.12)PFNS(6.12)R	8	2	-0.2557
A1L390;A1L390-3;A1L390-2	824;768;357	A1L390	A1L390	Pleckstrin homology domain-containing family G member 3	PLEKHG3	>sp|A1L390|PKHG3_HUMAN Pleckstrin homology domain-containing family G member 3 OS=Homo sapiens GN=PLEKHG3 PE=1 SV=1;>sp|A1L390-3|PKHG3_HUMAN Isoform 3 of Pleckstrin homology domain-containing family G member 3 OS=Homo sapiens GN=PLEKHG3;>sp|A1L390-2|PKHG3_	0.674749	5.15693	0.00238306	82.663	51.048	1	S	RPSSEIVKIWEGMESSGGSPGKGPGQGQANG	X;X;X;X;X;X;X;X;X;X;X;X;X;X;X;Phospho (STY);X;X;X;X;X;X;X;X;X;X;X;X;X;X;X	XXXXXXXXPPPPPPPPPPPPPPXXXXXXXXX	IWEGMES(0.119)S(0.675)GGS(0.206)PGK	IWEGMES(-7.52)S(5.16)GGS(-5.16)PGK	8	2	0.029883
A1L390;A1L390-3;A1L390-2	827;771;360	A1L390	A1L390	Pleckstrin homology domain-containing family G member 3	PLEKHG3	>sp|A1L390|PKHG3_HUMAN Pleckstrin homology domain-containing family G member 3 OS=Homo sapiens GN=PLEKHG3 PE=1 SV=1;>sp|A1L390-3|PKHG3_HUMAN Isoform 3 of Pleckstrin homology domain-containing family G member 3 OS=Homo sapiens GN=PLEKHG3;>sp|A1L390-2|PKHG3_	0.999397	34.7955	4.51378e-05	108.71	84.629	1	S	SEIVKIWEGMESSGGSPGKGPGQGQANGFDL	X;X;X;X;X;X;X;X;X;X;X;X;X;X;X;Phospho (STY);X;X;X;X;X;X;X;X;X;X;X;X;X;X;X	XXXXXPPPPPPPPPPPPPPXXXXXXXXXXXX	IWEGMESSGGS(0.999)PGK	IWEGMES(-34.8)S(-35.66)GGS(34.8)PGK	11	2	3.7149e-05
A1L390;A1L390-3;A1L390-2	962;906;495	A1L390	A1L390	Pleckstrin homology domain-containing family G member 3	PLEKHG3	>sp|A1L390|PKHG3_HUMAN Pleckstrin homology domain-containing family G member 3 OS=Homo sapiens GN=PLEKHG3 PE=1 SV=1;>sp|A1L390-3|PKHG3_HUMAN Isoform 3 of Pleckstrin homology domain-containing family G member 3 OS=Homo sapiens GN=PLEKHG3;>sp|A1L390-2|PKHG3_	0.966856	14.6495	0.000780242	66.022	49.424	1	S	PPLQWEKVAPERDGKSPTVPCLQEEAGEPLG	X;X;X;X;X;X;X;X;X;X;X;X;X;X;X;Phospho (STY);X;X;X;X;X;X;X;X;X;X;X;X;X;X;X	XXXXXXXPPPPPPPPPPPPPPPPPPPPPPPP	VAPERDGKS(0.967)PT(0.033)VPCLQEEAGEPLGGK	VAPERDGKS(14.65)PT(-14.65)VPCLQEEAGEPLGGK	9	3	0.013537																0.59621	0.60462	0.473	0.73548	0.32935	0.47335
A1X283	291	A1X283	A1X283	SH3 and PX domain-containing protein 2B	SH3PXD2B	>sp|A1X283|SPD2B_HUMAN SH3 and PX domain-containing protein 2B OS=Homo sapiens GN=SH3PXD2B PE=1 SV=3	0.979924	17.0023	1.27906e-08	99.603	81.707	1	S	KKNSGEPLPPKPGPGSPSHPGALDLDGVSRQ	X;X;X;X;X;X;X;X;X;X;X;X;X;X;X;Phospho (STY);X;X;X;X;X;X;X;X;X;X;X;X;X;X;X	XXPPPPPPPPPPPPPPPPPPPPPPPPPPPPX	NSGEPLPPKPGPGS(0.98)PS(0.02)HPGALDLDGVSR	NS(-33.93)GEPLPPKPGPGS(17)PS(-17)HPGALDLDGVS(-38.52)R	14	3	-0.1969	0.91555	0.72429	0.58173	0.83083			0.73694		0.7427	0.71567	0.68553	0.54763		0.581		0.7195		0.38596			0.63415						0.65558
A1X283	293	A1X283	A1X283	SH3 and PX domain-containing protein 2B	SH3PXD2B	>sp|A1X283|SPD2B_HUMAN SH3 and PX domain-containing protein 2B OS=Homo sapiens GN=SH3PXD2B PE=1 SV=3	0.989496	19.7469	4.40651e-06	115.39	100.51	1	S	NSGEPLPPKPGPGSPSHPGALDLDGVSRQQN	X;X;X;X;X;X;X;X;X;X;X;X;X;X;X;Phospho (STY);X;X;X;X;X;X;X;X;X;X;X;X;X;X;X	PPPPPPPPPPPPPPPPPPPPPPPPPPPPXXX	NSGEPLPPKPGPGS(0.01)PS(0.989)HPGALDLDGVSR	NS(-48.92)GEPLPPKPGPGS(-19.75)PS(19.75)HPGALDLDGVS(-56.13)R	16	4	0.20678			0.45959	0.78943	0.69328	0.8179	0.67274	0.79435	0.73984		0.6606		0.62904	0.57427	0.89574					0.64073	0.84062	0.68587	0.86	0.45653	0.7434		0.69647
A2RRP1;A2RRP1-2	473;473	A2RRP1	A2RRP1	Neuroblastoma-amplified sequence	NBAS	>sp|A2RRP1|NBAS_HUMAN Neuroblastoma-amplified sequence OS=Homo sapiens GN=NBAS PE=1 SV=2;>sp|A2RRP1-2|NBAS_HUMAN Isoform 2 of Neuroblastoma-amplified sequence OS=Homo sapiens GN=NBAS	0.967392	14.7343	5.40005e-05	101.76	75.606	1	S	RLETRAGEEDEGEEDSDSDYEISAKARYFGY	X;X;X;X;X;X;X;X;X;X;X;X;X;X;X;Phospho (STY);X;X;X;X;X;X;X;X;X;X;X;X;X;X;X	XXXXXPPPPPPPPPPPPPPPPPPPPXXXXXX	AGEEDEGEEDS(0.967)DS(0.033)DYEISAK	AGEEDEGEEDS(14.73)DS(-14.73)DY(-40.8)EIS(-52.31)AK	11	2	-0.028039																			1.3134	0.57039		1.2803	1.0586	0.88441
A2RTY3;A2RTY3-3;A2RTY3-5;A2RTY3-4	274;234;200;240	A2RTY3	A2RTY3	Uncharacterized protein C17orf66	C17orf66	>sp|A2RTY3|HEAT9_HUMAN Protein HEATR9 OS=Homo sapiens GN=HEATR9 PE=2 SV=2;>sp|A2RTY3-3|HEAT9_HUMAN Isoform 3 of Protein HEATR9 OS=Homo sapiens GN=HEATR9;>sp|A2RTY3-5|HEAT9_HUMAN Isoform 5 of Protein HEATR9 OS=Homo sapiens GN=HEATR9;>sp|A2RTY3-4|HEAT9_HUMAN	0.990242	22.3519	0.00228807	88.951	52.825	2	S	EGKLVPVLQTLIKKSSSEASLEAALCLGFLR	X;X;X;X;X;X;X;X;X;X;X;X;X;X;X;Phospho (STY);Phospho (STY);X;X;Phospho (STY);X;X;X;X;X;X;X;X;X;X;X	XXXXXXXXXXXXXPPPPPPPPPPPPPPPPPP	KS(0.005)S(0.99)S(0.099)EAS(0.906)LEAALCLGFLR	KS(-23.5)S(22.35)S(-9.81)EAS(9.81)LEAALCLGFLR	3	2	0.62777	0.78492	0.77697		2.0526	0.80774	0.99232	2.1955	0.72153	0.69084	0.78822					1.1295	0.62755	0.52864		0.76811	0.53814	0.56777		0.70883		0.72524	0.28632
A2RTY3;A2RTY3-3;A2RTY3-5;A2RTY3-4	275;235;201;241	A2RTY3	A2RTY3	Uncharacterized protein C17orf66	C17orf66	>sp|A2RTY3|HEAT9_HUMAN Protein HEATR9 OS=Homo sapiens GN=HEATR9 PE=2 SV=2;>sp|A2RTY3-3|HEAT9_HUMAN Isoform 3 of Protein HEATR9 OS=Homo sapiens GN=HEATR9;>sp|A2RTY3-5|HEAT9_HUMAN Isoform 5 of Protein HEATR9 OS=Homo sapiens GN=HEATR9;>sp|A2RTY3-4|HEAT9_HUMAN	0.977311	16.3875	0.00228807	88.951	52.825	2	S	GKLVPVLQTLIKKSSSEASLEAALCLGFLRP	X;X;X;X;X;X;X;X;X;X;X;X;X;Phospho (STY);Phospho (STY);Phospho (STY);X;X;Phospho (STY);X;X;X;X;X;X;X;X;X;X;X;X	XXXXXXXXXXXXPPPPPPPPPPPPPPPPPPX	KS(0.016)S(0.984)S(0.977)EAS(0.023)LEAALCLGFLR	KS(-18.05)S(18.05)S(16.39)EAS(-16.39)LEAALCLGFLR	4	2	0.70073	0.88315							0.74373	0.6131	0.94972
A2RTY3;A2RTY3-3;A2RTY3-5;A2RTY3-4	278;238;204;244	A2RTY3	A2RTY3	Uncharacterized protein C17orf66	C17orf66	>sp|A2RTY3|HEAT9_HUMAN Protein HEATR9 OS=Homo sapiens GN=HEATR9 PE=2 SV=2;>sp|A2RTY3-3|HEAT9_HUMAN Isoform 3 of Protein HEATR9 OS=Homo sapiens GN=HEATR9;>sp|A2RTY3-5|HEAT9_HUMAN Isoform 5 of Protein HEATR9 OS=Homo sapiens GN=HEATR9;>sp|A2RTY3-4|HEAT9_HUMAN	0.980578	17.0966	0.00353846	72.583	32.2	2	S	VPVLQTLIKKSSSEASLEAALCLGFLRPCSN	X;X;X;X;X;X;X;X;X;X;Phospho (STY);Phospho (STY);Phospho (STY);X;X;Phospho (STY);X;X;X;X;X;X;X;X;X;X;X;X;X;X;X	XXXXXXXXXPPPPPPPPPPPPPPPPPPXXXX	KS(0.02)S(0.966)S(0.034)EAS(0.981)LEAALCLGFLR	KS(-17.02)S(17.02)S(-17.1)EAS(17.1)LEAALCLGFLR	7	2	0.27744	0.78492	0.77697		2.0526	0.80774	0.99232	2.1955	0.7	0.77845	0.65419					1.1295	0.62755	0.60935		0.76811	0.53814	0.56777		0.70883		0.72524	0.28632
A3KN83;A3KN83-4;A3KN83-3;A3KN83-2	214;213;212;213	A3KN83	A3KN83	Protein strawberry notch homolog 1	SBNO1	>sp|A3KN83|SBNO1_HUMAN Protein strawberry notch homolog 1 OS=Homo sapiens GN=SBNO1 PE=1 SV=1;>sp|A3KN83-4|SBNO1_HUMAN Isoform 4 of Protein strawberry notch homolog 1 OS=Homo sapiens GN=SBNO1;>sp|A3KN83-3|SBNO1_HUMAN Isoform 3 of Protein strawberry notch ho	0.996604	24.6755	0.000314917	111.06	111.06	1	S	EGARMWINDMKMRSFSPTMKVPVVKEDDEPE	X;X;X;X;X;X;X;X;X;X;X;X;X;X;X;Phospho (STY);X;X;X;X;X;X;X;X;X;X;X;X;X;X;X	XXXXXXXXXXXXXPPPPPPPXXXXXXXXXXX	SFS(0.997)PT(0.003)MK	S(-64.54)FS(24.68)PT(-24.68)MK	3	2	0.15311															0.82188
A4D0T2	8	A4D0T2	A4D0T2	Uncharacterized protein C7orf66	C7orf66	>sp|A4D0T2|CG066_HUMAN Uncharacterized protein C7orf66 OS=Homo sapiens GN=C7orf66 PE=4 SV=1	0.999879	44.0588	0.00248551	56.017	37.622	1;3	S	________MMAVMTPSDGLSQLSVPHLTHQR	X;X;X;X;X;X;X;X;Oxidation (M);Oxidation (M);X;X;Oxidation (M);Phospho (STY);X;Phospho (STY);X;X;X;Phospho (STY);X;X;X;X;X;X;X;X;X;X;X	XXXXXXXXPPPPPPPPPPPPPPPPPPPPPPP	MMAVMT(1)PS(1)DGLS(0.992)QLS(0.006)VPHLT(0.002)HQR	MMAVMT(44.06)PS(44.06)DGLS(22.56)QLS(-22.56)VPHLT(-28.01)HQR	8	3	-0.4027
A4D0T2	12	A4D0T2	A4D0T2	Uncharacterized protein C7orf66	C7orf66	>sp|A4D0T2|CG066_HUMAN Uncharacterized protein C7orf66 OS=Homo sapiens GN=C7orf66 PE=4 SV=1	0.997244	28.4942	0.00248551	56.017	37.622	3	S	____MMAVMTPSDGLSQLSVPHLTHQRLWSL	X;X;X;X;Oxidation (M);Oxidation (M);X;X;X;Phospho (STY);X;Phospho (STY);X;X;X;Phospho (STY);X;X;X;X;X;X;X;X;X;X;X;X;X;X;X	XXXXPPPPPPPPPPPPPPPPPPPPPPPXXXX	MMAVMT(1)PS(1)DGLS(0.997)QLS(0.001)VPHLT(0.002)HQR	MMAVMT(42.65)PS(42.65)DGLS(28.49)QLS(-29.28)VPHLT(-28.49)HQR	12	3	-0.1459
A4D1P6-3;A4D1P6-2;A4D1P6	272;272;272	A4D1P6-3	A4D1P6-3	WD repeat-containing protein 91	WDR91	>sp|A4D1P6-3|WDR91_HUMAN Isoform 3 of WD repeat-containing protein 91 OS=Homo sapiens GN=WDR91;>sp|A4D1P6-2|WDR91_HUMAN Isoform 2 of WD repeat-containing protein 91 OS=Homo sapiens GN=WDR91;>sp|A4D1P6|WDR91_HUMAN WD repeat-containing protein 91 OS=Homo sap	0.93392	10.9797	0.000254171	83.948	57.604	2	S	PRVGFLSSLLPQSKKSPSRLSPAQGPPQPQS	X;X;X;X;X;X;X;X;X;X;X;X;X;X;X;Phospho (STY);X;X;X;X;Phospho (STY);X;X;X;X;X;X;X;X;X;X	XXXXXXXXXXXXXXPPPPPPPPPPPPPPPPP	KS(0.934)PS(0.172)RLS(0.894)PAQGPPQPQSSAK	KS(10.98)PS(-8.93)RLS(8.93)PAQGPPQPQS(-76.46)S(-76.53)AK	2	3	-0.063579
A4D1P6-3;A4D1P6-2;A4D1P6	277;277;277	A4D1P6-3	A4D1P6-3	WD repeat-containing protein 91	WDR91	>sp|A4D1P6-3|WDR91_HUMAN Isoform 3 of WD repeat-containing protein 91 OS=Homo sapiens GN=WDR91;>sp|A4D1P6-2|WDR91_HUMAN Isoform 2 of WD repeat-containing protein 91 OS=Homo sapiens GN=WDR91;>sp|A4D1P6|WDR91_HUMAN WD repeat-containing protein 91 OS=Homo sap	0.937698	10.1001	0.000254171	83.948	57.604	2	S	LSSLLPQSKKSPSRLSPAQGPPQPQSSAKKE	X;X;X;X;X;X;X;X;X;X;Phospho (STY);X;X;X;X;Phospho (STY);X;X;X;X;X;X;X;X;X;X;X;X;X;X;X	XXXXXXXXXPPPPPPPPPPPPPPPPPPPPXX	KS(0.699)PS(0.363)RLS(0.938)PAQGPPQPQSSAK	KS(3.26)PS(-3.26)RLS(10.1)PAQGPPQPQS(-44.11)S(-44.11)AK	7	3	0.24227
A5YM69;Q12774	474;474	A5YM69;Q12774	Q12774	Rho guanine nucleotide exchange factor 35;Rho guanine nucleotide exchange factor 5	ARHGEF35;ARHGEF5	>sp|A5YM69|ARG35_HUMAN Rho guanine nucleotide exchange factor 35 OS=Homo sapiens GN=ARHGEF35 PE=1 SV=1;>sp|Q12774|ARHG5_HUMAN Rho guanine nucleotide exchange factor 5 OS=Homo sapiens GN=ARHGEF5 PE=1 SV=3	1	64.4935	6.65128e-07	122.29	85.517	1	S	SHQPISLLGSFLTEESPDKEIDQNSQQEESR;SHQPISLLGSFLTEESPDKEKLLSVL_____	X;X;X;X;X;X;X;X;X;X;X;X;X;X;X;Phospho (STY);X;X;X;X;X;X;X;X;X;X;X;X;X;X;X	PPPPPPPPPPPPPPPPPPPXXXXXXXXXXXX	CSHQPISLLGSFLTEES(1)PDK	CS(-106.74)HQPIS(-108.53)LLGS(-94.85)FLT(-64.49)EES(64.49)PDK	17	3	-0.19793
A5YM69	184	A5YM69	A5YM69	Rho guanine nucleotide exchange factor 35	ARHGEF35	>sp|A5YM69|ARG35_HUMAN Rho guanine nucleotide exchange factor 35 OS=Homo sapiens GN=ARHGEF35 PE=1 SV=1	0.947447	13.5426	3.37746e-05	92.792	69.256	1	S	EEETSSDNSGQTRYYSPCEEHPAETNQNEGA	X;X;X;X;X;X;X;X;X;X;X;X;X;X;X;Phospho (STY);X;X;X;X;X;X;X;X;X;X;X;X;X;X;X	XXXXXXXXXXXXXPPPPPPPPPPPPPPPPPP	Y(0.011)Y(0.042)S(0.947)PCEEHPAETNQNEGAESGTIR	Y(-19.5)Y(-13.54)S(13.54)PCEEHPAET(-52.69)NQNEGAES(-64.85)GT(-64.56)IR	3	3	-2.5424		1.4078															0.98911			0.78451	0.98036
A6ND36;A6ND36-2	666;418	A6ND36	A6ND36	Protein FAM83G	FAM83G	>sp|A6ND36|FA83G_HUMAN Protein FAM83G OS=Homo sapiens GN=FAM83G PE=1 SV=2;>sp|A6ND36-2|FA83G_HUMAN Isoform 2 of Protein FAM83G OS=Homo sapiens GN=FAM83G	0.999965	44.617	1.33504e-08	137.23	102.97	1	S	APHITRGTFVGPQGGSPWAQSRGREEADALK	X;X;X;X;X;X;X;X;X;X;X;X;X;X;X;Phospho (STY);X;X;X;X;X;X;X;X;X;X;X;X;X;X;X	XXXXXXPPPPPPPPPPPPPPPPXXXXXXXXX	GTFVGPQGGS(1)PWAQSR	GT(-77.16)FVGPQGGS(44.62)PWAQS(-44.62)R	10	2	0.14832
A6NFI3	10	A6NFI3	A6NFI3	Zinc finger protein 316	ZNF316	>sp|A6NFI3|ZN316_HUMAN Zinc finger protein 316 OS=Homo sapiens GN=ZNF316 PE=1 SV=1	0.996968	25.3997	0.000614238	84.403	39.968	1	S	______MAALHTTPDSPAAQLERAEDGSECD	X;X;X;X;X;X;X;X;X;X;X;X;X;X;X;Phospho (STY);X;X;X;X;X;X;X;X;X;X;X;X;X;X;X	XXXXXXXPPPPPPPPPPPPPPPPXXXXXXXX	AALHTT(0.003)PDS(0.997)PAAQLER	AALHT(-38.04)T(-25.4)PDS(25.4)PAAQLER	9	2	1.6424
A6NI28	811	A6NI28	A6NI28	Rho GTPase-activating protein 42	ARHGAP42	>sp|A6NI28|RHG42_HUMAN Rho GTPase-activating protein 42 OS=Homo sapiens GN=ARHGAP42 PE=1 SV=3	1	75.6341	0.000296108	244.23	209.75	1	S	GSVVAAKAQLFENVGSPKPVSSGRQAKAMYS	X;X;X;X;X;X;X;X;X;X;X;X;X;X;X;Phospho (STY);X;X;X;X;X;X;X;X;X;X;X;X;X;X;X	XXXXXXXPPPPPPPPPPPPPPPPPXXXXXXX	AQLFENVGS(1)PKPVSSGR	AQLFENVGS(75.63)PKPVS(-75.63)S(-112.4)GR	9	3	0.331
A6NI28	686	A6NI28	A6NI28	Rho GTPase-activating protein 42	ARHGAP42	>sp|A6NI28|RHG42_HUMAN Rho GTPase-activating protein 42 OS=Homo sapiens GN=ARHGAP42 PE=1 SV=3	0.820059	9.89314	0.000358472	117.86	57.976	1	S	SNGQKSLGLWTTSPESSSREDATKTDAESDC	X;X;X;X;X;X;X;X;X;X;X;X;X;X;X;Phospho (STY);X;X;X;X;X;X;X;X;X;X;X;X;X;X;X	XXXXXPPPPPPPPPPPPPPPPPPPXXXXXXX	SLGLWT(0.001)T(0.001)S(0.084)PES(0.82)S(0.084)S(0.009)REDATK	S(-55.24)LGLWT(-28.1)T(-28.1)S(-9.89)PES(9.89)S(-9.89)S(-19.45)REDAT(-88.87)K	11	3	-2.1225
A6NI28	687	A6NI28	A6NI28	Rho GTPase-activating protein 42	ARHGAP42	>sp|A6NI28|RHG42_HUMAN Rho GTPase-activating protein 42 OS=Homo sapiens GN=ARHGAP42 PE=1 SV=3	0.445696	0	0.000467958	85.973	43.722		S	NGQKSLGLWTTSPESSSREDATKTDAESDCQ	X;X;X;X;X;X;X;X;X;X;X;X;X;X;X;X;X;X;X;X;X;X;X;X;X;X;X;X;X;X;X	XXXXXXXXXXXXXXXXXXXXXXXXXXXXXXX	SLGLWT(0.013)T(0.002)S(0.027)PES(0.446)S(0.446)S(0.067)REDATK	S(-47.87)LGLWT(-15.43)T(-23.24)S(-12.21)PES(0)S(0)S(-8.23)REDAT(-61.1)K	12	3	-1.7608
A6NI28	688	A6NI28	A6NI28	Rho GTPase-activating protein 42	ARHGAP42	>sp|A6NI28|RHG42_HUMAN Rho GTPase-activating protein 42 OS=Homo sapiens GN=ARHGAP42 PE=1 SV=3	0.466385	2.4971	0.000917728	89.816	52.659		S	GQKSLGLWTTSPESSSREDATKTDAESDCQS	X;X;X;X;X;X;X;X;X;X;X;X;X;X;X;Phospho (STY);X;X;X;X;X;X;X;X;X;X;X;X;X;X;X	XXXPPPPPPPPPPPPPPPPPPPXXXXXXXXX	SLGLWTTS(0.008)PES(0.262)S(0.262)S(0.466)REDATK	S(-69.75)LGLWT(-37.99)T(-31.32)S(-17.5)PES(-2.5)S(-2.5)S(2.5)REDAT(-44.2)K	13	3	-1.7342
A6NKF1	402	A6NKF1	A6NKF1	SAC3 domain-containing protein 1	SAC3D1	>sp|A6NKF1|SAC31_HUMAN SAC3 domain-containing protein 1 OS=Homo sapiens GN=SAC3D1 PE=1 SV=2	0.99872	28.9234	3.07028e-05	107.58	84.814	1	S	VVMAEEEDEGTDRPGSPA_____________	X;X;X;X;X;X;X;X;X;X;X;X;X;X;X;Phospho (STY);X;X;X;X;X;X;X;X;X;X;X;X;X;X;X	PPPPPPPPPPPPPPPPPPXXXXXXXXXXXXX	TLEEVVMAEEEDEGT(0.001)DRPGS(0.999)PA	T(-100.1)LEEVVMAEEEDEGT(-28.92)DRPGS(28.92)PA	20	2	-0.34086																			1.3644
A7E2V4;A7E2V4-5;A7E2V4-3;A7E2V4-4;A7E2V4-2	1153;1153;1165;1158;1153	A7E2V4	A7E2V4	Zinc finger SWIM domain-containing protein 8	ZSWIM8	>sp|A7E2V4|ZSWM8_HUMAN Zinc finger SWIM domain-containing protein 8 OS=Homo sapiens GN=ZSWIM8 PE=1 SV=1;>sp|A7E2V4-5|ZSWM8_HUMAN Isoform 5 of Zinc finger SWIM domain-containing protein 8 OS=Homo sapiens GN=ZSWIM8;>sp|A7E2V4-3|ZSWM8_HUMAN Isoform 3 of Zinc	0.338869	1.24419	0.00278477	55.208	17.358		S	HTGMASIDSSAPETTSDSSPTLSRRPLRGGW	X;X;X;X;X;X;X;X;X;X;X;X;X;X;X;Phospho (STY);X;X;X;X;X;X;X;X;X;X;X;X;X;X;X	PPPPPPPPPPPPPPPPPPPPPPPPXXXXXXX	HTGMASIDSSAPET(0.036)T(0.108)S(0.339)DS(0.254)S(0.193)PT(0.063)LS(0.007)R	HT(-46.86)GMAS(-49.74)IDS(-44.01)S(-39.91)APET(-9.78)T(-4.95)S(1.24)DS(-1.24)S(-2.45)PT(-7.28)LS(-17.07)R	16	3	0.17912
A7E2V4;A7E2V4-5;A7E2V4-3;A7E2V4-4;A7E2V4-2	1155;1155;1167;1160;1155	A7E2V4	A7E2V4	Zinc finger SWIM domain-containing protein 8	ZSWIM8	>sp|A7E2V4|ZSWM8_HUMAN Zinc finger SWIM domain-containing protein 8 OS=Homo sapiens GN=ZSWIM8 PE=1 SV=1;>sp|A7E2V4-5|ZSWM8_HUMAN Isoform 5 of Zinc finger SWIM domain-containing protein 8 OS=Homo sapiens GN=ZSWIM8;>sp|A7E2V4-3|ZSWM8_HUMAN Isoform 3 of Zinc	0.336751	0	0.00120941	53.718	30.083		S	GMASIDSSAPETTSDSSPTLSRRPLRGGWAP	X;X;X;X;X;X;X;X;X;X;X;X;X;X;X;Phospho (STY);X;X;X;X;X;X;X;X;X;X;X;X;X;X;X	PPPPPPPPPPPPPPPPPPPPPPXXXXXXXXX	HTGMASIDSSAPET(0.026)T(0.026)S(0.095)DS(0.337)S(0.337)PT(0.128)LS(0.05)R	HT(-48.57)GMAS(-50.47)IDS(-38.17)S(-28.82)APET(-11.1)T(-11.1)S(-5.47)DS(0)S(0)PT(-4.19)LS(-8.29)R	18	3	0.017908
A7E2V4;A7E2V4-5;A7E2V4-3;A7E2V4-4;A7E2V4-2	1156;1156;1168;1161;1156	A7E2V4	A7E2V4	Zinc finger SWIM domain-containing protein 8	ZSWIM8	>sp|A7E2V4|ZSWM8_HUMAN Zinc finger SWIM domain-containing protein 8 OS=Homo sapiens GN=ZSWIM8 PE=1 SV=1;>sp|A7E2V4-5|ZSWM8_HUMAN Isoform 5 of Zinc finger SWIM domain-containing protein 8 OS=Homo sapiens GN=ZSWIM8;>sp|A7E2V4-3|ZSWM8_HUMAN Isoform 3 of Zinc	0.532402	5.05253	0.000677092	57.142	32.189	1	S	MASIDSSAPETTSDSSPTLSRRPLRGGWAPT	X;X;X;X;X;X;X;X;X;X;X;X;X;X;X;Phospho (STY);X;X;X;X;X;X;X;X;X;X;X;X;X;X;X	PPPPPPPPPPPPPPPPPPPPPXXXXXXXXXX	HTGMASIDSSAPET(0.07)T(0.053)S(0.166)DS(0.125)S(0.532)PT(0.047)LS(0.004)R	HT(-43.52)GMAS(-44.92)IDS(-36.85)S(-32.24)APET(-8.79)T(-9.99)S(-5.05)DS(-6.28)S(5.05)PT(-10.51)LS(-20.78)R	19	3	0.23433
A7E2V4;A7E2V4-5;A7E2V4-3;A7E2V4-4;A7E2V4-2	1088;1088;1100;1093;1088	A7E2V4	A7E2V4	Zinc finger SWIM domain-containing protein 8	ZSWIM8	>sp|A7E2V4|ZSWM8_HUMAN Zinc finger SWIM domain-containing protein 8 OS=Homo sapiens GN=ZSWIM8 PE=1 SV=1;>sp|A7E2V4-5|ZSWM8_HUMAN Isoform 5 of Zinc finger SWIM domain-containing protein 8 OS=Homo sapiens GN=ZSWIM8;>sp|A7E2V4-3|ZSWM8_HUMAN Isoform 3 of Zinc	0.822288	5.62203	9.91136e-05	69.704	51.302	3	S	GPGPTEGFTEKNVPESSPHSPCEGLPSEAAL	X;X;X;X;X;X;X;X;X;X;X;X;X;X;X;Phospho (STY);X;X;X;Phospho (STY);X;X;X;X;X;X;X;X;X;X;X	XXXXXXXXXXXPPPPPPPPPPPPPPPPPPPP	NVPES(0.822)S(0.354)PHS(0.821)PCEGLPS(0.016)EAALT(0.986)PRPEGK	NVPES(5.62)S(-5.62)PHS(5.62)PCEGLPS(-18.82)EAALT(18.82)PRPEGK	5	3	0.083279																0.46393		0.51226	0.47299		0.28113	0.25701
A7E2V4;A7E2V4-5;A7E2V4-3;A7E2V4-4;A7E2V4-2	1089;1089;1101;1094;1089	A7E2V4	A7E2V4	Zinc finger SWIM domain-containing protein 8	ZSWIM8	>sp|A7E2V4|ZSWM8_HUMAN Zinc finger SWIM domain-containing protein 8 OS=Homo sapiens GN=ZSWIM8 PE=1 SV=1;>sp|A7E2V4-5|ZSWM8_HUMAN Isoform 5 of Zinc finger SWIM domain-containing protein 8 OS=Homo sapiens GN=ZSWIM8;>sp|A7E2V4-3|ZSWM8_HUMAN Isoform 3 of Zinc	0.816849	6.45534	9.91136e-05	69.704	51.302	3	S	PGPTEGFTEKNVPESSPHSPCEGLPSEAALT	X;X;X;X;X;X;X;X;X;X;X;X;X;X;X;Phospho (STY);X;X;Phospho (STY);X;X;X;X;X;X;X;X;X;X;X;Phospho (STY)	XXXXXXXXXXPPPPPPPPPPPPPPPPPPPPP	NVPES(0.195)S(0.817)PHS(0.986)PCEGLPS(0.024)EAALT(0.978)PRPEGK	NVPES(-6.46)S(6.46)PHS(18.46)PCEGLPS(-16.7)EAALT(16.7)PRPEGK	6	3	0.29025																0.46393		0.51226		0.30216	0.28113		0.32916
A7E2V4;A7E2V4-5;A7E2V4-3;A7E2V4-4;A7E2V4-2	1092;1092;1104;1097;1092	A7E2V4	A7E2V4	Zinc finger SWIM domain-containing protein 8	ZSWIM8	>sp|A7E2V4|ZSWM8_HUMAN Zinc finger SWIM domain-containing protein 8 OS=Homo sapiens GN=ZSWIM8 PE=1 SV=1;>sp|A7E2V4-5|ZSWM8_HUMAN Isoform 5 of Zinc finger SWIM domain-containing protein 8 OS=Homo sapiens GN=ZSWIM8;>sp|A7E2V4-3|ZSWM8_HUMAN Isoform 3 of Zinc	0.986305	18.4576	9.91136e-05	69.704	51.302	3	S	TEGFTEKNVPESSPHSPCEGLPSEAALTPRP	X;X;X;X;X;X;X;X;X;X;X;Phospho (STY);Phospho (STY);X;X;Phospho (STY);X;X;X;X;X;X;X;X;X;X;X;Phospho (STY);X;X;X	XXXXXXXPPPPPPPPPPPPPPPPPPPPPPPP	NVPES(0.195)S(0.817)PHS(0.986)PCEGLPS(0.024)EAALT(0.978)PRPEGK	NVPES(-6.46)S(6.46)PHS(18.46)PCEGLPS(-16.7)EAALT(16.7)PRPEGK	9	3	0.29025																0.46393		0.51226	0.47299	0.30216	0.28113	0.25701	0.32916
A7KAX9-2;A7KAX9	603;952	A7KAX9-2	A7KAX9-2	Rho GTPase-activating protein 32	ARHGAP32	>sp|A7KAX9-2|RHG32_HUMAN Isoform 2 of Rho GTPase-activating protein 32 OS=Homo sapiens GN=ARHGAP32;>sp|A7KAX9|RHG32_HUMAN Rho GTPase-activating protein 32 OS=Homo sapiens GN=ARHGAP32 PE=1 SV=1	0.993801	22.05	0.000456259	147.73	109.43	1	S	STWDKCVEERDATNRSPTQIVKMKTNETVAQ	X;X;X;X;X;X;X;X;X;X;X;X;X;X;X;Phospho (STY);X;X;X;X;X;X;X;X;X;X;X;X;X;X;X	XXXXXXXXXXPPPPPPPPPPPPXXXXXXXXX	DATNRS(0.994)PT(0.006)QIVK	DAT(-61.77)NRS(22.05)PT(-22.05)QIVK	6	3	0.12444		0.61658	0.38811		0.8511				1.0855	1.0093	0.69285	0.71786				0.94496	0.80987		1.0841			0.92749	0.81718	0.85922
A7KAX9-2;A7KAX9	243;592	A7KAX9-2	A7KAX9-2	Rho GTPase-activating protein 32	ARHGAP32	>sp|A7KAX9-2|RHG32_HUMAN Isoform 2 of Rho GTPase-activating protein 32 OS=Homo sapiens GN=ARHGAP32;>sp|A7KAX9|RHG32_HUMAN Rho GTPase-activating protein 32 OS=Homo sapiens GN=ARHGAP32 PE=1 SV=1	0.733834	7.31728	0.000106244	97.734	45.155	1	S	EGAASLSRPKSLLVSSPSTKLLTLEEAQART	X;X;X;X;X;X;X;X;X;X;X;X;X;X;X;Phospho (STY);X;X;X;X;X;X;X;X;X;X;X;X;X;X;X	XXXXXXXXXXPPPPPPPPPPXXXXXXXXXXX	SLLVS(0.104)S(0.734)PS(0.136)T(0.026)K	S(-66.43)LLVS(-8.48)S(7.32)PS(-7.32)T(-14.54)K	6	2	0.29752															0.92199
A7KAX9-2;A7KAX9	357;706	A7KAX9-2	A7KAX9-2	Rho GTPase-activating protein 32	ARHGAP32	>sp|A7KAX9-2|RHG32_HUMAN Isoform 2 of Rho GTPase-activating protein 32 OS=Homo sapiens GN=ARHGAP32;>sp|A7KAX9|RHG32_HUMAN Rho GTPase-activating protein 32 OS=Homo sapiens GN=ARHGAP32 PE=1 SV=1	0.999996	53.6743	4.3989e-06	276.62	225.05	1	S	ALKGGRAEGTLRSAKSEESLTSLHAVDGDSK	X;X;X;X;X;X;X;X;X;X;X;X;X;X;X;Phospho (STY);X;X;X;X;X;X;X;X;X;X;X;X;X;X;X	XXXXXXXXXXXXPPPPPPPPPPPPPPPPPPP	SAKS(1)EESLTSLHAVDGDSK	S(-53.67)AKS(53.67)EES(-75.89)LT(-83.72)S(-91.28)LHAVDGDS(-149.67)K	4	3	0.29181	0.78506																0.94038	0.93743	0.85378	0.90048	0.59521		0.58393		0.69653	1.0223
A7KAX9-2;A7KAX9	264;613	A7KAX9-2	A7KAX9-2	Rho GTPase-activating protein 32	ARHGAP32	>sp|A7KAX9-2|RHG32_HUMAN Isoform 2 of Rho GTPase-activating protein 32 OS=Homo sapiens GN=ARHGAP32;>sp|A7KAX9|RHG32_HUMAN Rho GTPase-activating protein 32 OS=Homo sapiens GN=ARHGAP32 PE=1 SV=1	0.999823	37.5229	0.000121729	108.47	81.461		S	LTLEEAQARTQAQVNSPIVTENKYIEVGEGP	X;X;X;X;X;X;X;X;X;X;X;X;X;X;X;Phospho (STY);X;X;X;X;X;X;X;X;X;X;X;X;X;X;X	XXXXXXXXXPPPPPPPPPPPPPPXXXXXXXX	TQAQVNS(1)PIVTENK	T(-63.93)QAQVNS(37.52)PIVT(-37.52)ENK	7	2	0.25736
A8CG34;A8CG34-2;Q96HA1;Q96HA1-2;Q96HA1-3	674;432;697;432;432	A8CG34;Q96HA1	A8CG34	Nuclear envelope pore membrane protein POM 121C;Nuclear envelope pore membrane protein POM 121	POM121C;POM121	>sp|A8CG34|P121C_HUMAN Nuclear envelope pore membrane protein POM 121C OS=Homo sapiens GN=POM121C PE=1 SV=2;>sp|A8CG34-2|P121C_HUMAN Isoform 2 of Nuclear envelope pore membrane protein POM 121C OS=Homo sapiens GN=POM121C;>sp|Q96HA1|P121A_HUMAN Nuclear enve	0.998442	31.9454	1.27137e-06	84.166	67.02	1	S	LQAETATKPQATSAPSPAPKQSFLFGTQNTS	X;X;X;X;X;X;X;X;X;X;X;X;X;X;X;Phospho (STY);X;X;X;X;X;X;X;X;X;X;X;X;X;X;X	PPPPPPPPPPPPPPPPPPPPXXXXXXXXXXX	APPTLQAETATKPQATS(0.001)APS(0.998)PAPK	APPT(-42.26)LQAET(-38.78)AT(-35.28)KPQAT(-33.63)S(-31.95)APS(31.95)PAPK	20	3	0.95782	0.63939	0.74082															0.61533	0.51608	0.55885							0.18112
A8CG34;A8CG34-2;Q96HA1;Q96HA1-2;Q96HA1-3;Q6PJE2;Q6PJE2-5	291;49;314;49;49;49;49	A8CG34;Q96HA1	A8CG34	Nuclear envelope pore membrane protein POM 121C;Nuclear envelope pore membrane protein POM 121;POM121 and ZP3 fusion protein	POM121C;POM121;POMZP3	>sp|A8CG34|P121C_HUMAN Nuclear envelope pore membrane protein POM 121C OS=Homo sapiens GN=POM121C PE=1 SV=2;>sp|A8CG34-2|P121C_HUMAN Isoform 2 of Nuclear envelope pore membrane protein POM 121C OS=Homo sapiens GN=POM121C;>sp|Q96HA1|P121A_HUMAN Nuclear enve	0.999998	56.1528	0.00170905	105.13	41.44	1	S	PSSNAPDPCAKETVLSALKEKEKKRTVEEED;PSSNAPDPCAKETVLSALKEKKKKRTVEEED	X;Phospho (STY);Phospho (STY);X;X;X;X;X;X;X;X;X;X;X;X;Phospho (STY);X;X;X;X;X;X;X;X;X;X;X;X;X;X;X	XXXXXXXXXXXPPPPPPPPXXXXXXXXXXXX	ETVLS(1)ALK	ET(-56.15)VLS(56.15)ALK	5	2	0.61731
A8CG34;A8CG34-2	441;199	A8CG34	A8CG34	Nuclear envelope pore membrane protein POM 121C	POM121C	>sp|A8CG34|P121C_HUMAN Nuclear envelope pore membrane protein POM 121C OS=Homo sapiens GN=POM121C PE=1 SV=2;>sp|A8CG34-2|P121C_HUMAN Isoform 2 of Nuclear envelope pore membrane protein POM 121C OS=Homo sapiens GN=POM121C	0.930124	13.4361	0.00400368	73.36	40.994	2	S	ERPAKKIREEELCHHSSSSTPLAADKESQGE	X;X;X;X;X;X;X;X;X;X;X;X;X;X;X;Phospho (STY);Phospho (STY);X;X;Phospho (STY);X;X;X;X;X;X;X;X;X;X;X	XXXXXXPPPPPPPPPPPPPPPPPPPPXXXXX	IREEELCHHS(0.93)S(0.929)S(0.092)S(0.03)T(0.019)PLAADK	IREEELCHHS(13.44)S(13.43)S(-13.43)S(-19.66)T(-22.67)PLAADK	10	4	0.37318
A8CG34;A8CG34-2	442;200	A8CG34	A8CG34	Nuclear envelope pore membrane protein POM 121C	POM121C	>sp|A8CG34|P121C_HUMAN Nuclear envelope pore membrane protein POM 121C OS=Homo sapiens GN=POM121C PE=1 SV=2;>sp|A8CG34-2|P121C_HUMAN Isoform 2 of Nuclear envelope pore membrane protein POM 121C OS=Homo sapiens GN=POM121C	0.928533	13.4257	0.00400368	73.36	40.994	1	S	RPAKKIREEELCHHSSSSTPLAADKESQGEK	X;X;X;X;X;X;X;X;X;X;X;X;X;X;Phospho (STY);Phospho (STY);X;X;X;X;X;X;X;X;X;X;X;X;X;X;X	XXXXXPPPPPPPPPPPPPPPPPPPPXXXXXX	IREEELCHHS(0.93)S(0.929)S(0.092)S(0.03)T(0.019)PLAADK	IREEELCHHS(13.44)S(13.43)S(-13.43)S(-19.66)T(-22.67)PLAADK	11	4	0.37318
A8CG34;Q96HA1	2;2	A8CG34;Q96HA1	A8CG34	Nuclear envelope pore membrane protein POM 121C;Nuclear envelope pore membrane protein POM 121	POM121C;POM121	>sp|A8CG34|P121C_HUMAN Nuclear envelope pore membrane protein POM 121C OS=Homo sapiens GN=POM121C PE=1 SV=2;>sp|Q96HA1|P121A_HUMAN Nuclear envelope pore membrane protein POM 121 OS=Homo sapiens GN=POM121 PE=1 SV=2	1	55.2914	6.26534e-05	84.753	42.405	1	S	______________MSPAAAAAGAGERRRPI	X;X;X;X;X;X;X;X;X;X;X;X;X;X;X;Phospho (STY);X;X;X;X;X;X;X;X;X;X;X;X;X;X;X	XXXXXXXXXXXXXXPPPPPPPPPPPPPXXXX	MS(1)PAAAAAGAGER	MS(55.29)PAAAAAGAGER	2	2	-0.5902
A8CG34;A8CG34-2;Q96HA1;Q96HA1-2;Q96HA1-3	246;4;269;4;4	A8CG34;Q96HA1	A8CG34	Nuclear envelope pore membrane protein POM 121C;Nuclear envelope pore membrane protein POM 121	POM121C;POM121	>sp|A8CG34|P121C_HUMAN Nuclear envelope pore membrane protein POM 121C OS=Homo sapiens GN=POM121C PE=1 SV=2;>sp|A8CG34-2|P121C_HUMAN Isoform 2 of Nuclear envelope pore membrane protein POM 121C OS=Homo sapiens GN=POM121C;>sp|Q96HA1|P121A_HUMAN Nuclear enve	0.999962	44.164	8.19728e-05	126.66	65.065	1	S	HKKAVLSPRNSRMVCSPVTVRIAPPDRRFSR	X;X;X;X;X;X;X;X;X;X;X;X;X;X;X;Phospho (STY);X;X;X;X;X;X;X;X;X;X;X;X;X;X;X	XXXXXXXXXXXXPPPPPPPPPXXXXXXXXXX	MVCS(1)PVTVR	MVCS(44.16)PVT(-44.16)VR	4	2	0.24305	1.1808														0.82632	0.79788	0.5998			0.76969
A8CG34;A8CG34-2;Q96HA1;Q96HA1-2;Q96HA1-3;Q6PJE2;Q6PJE2-5	271;29;294;29;29;29;29	A8CG34;Q96HA1	A8CG34	Nuclear envelope pore membrane protein POM 121C;Nuclear envelope pore membrane protein POM 121;POM121 and ZP3 fusion protein	POM121C;POM121;POMZP3	>sp|A8CG34|P121C_HUMAN Nuclear envelope pore membrane protein POM 121C OS=Homo sapiens GN=POM121C PE=1 SV=2;>sp|A8CG34-2|P121C_HUMAN Isoform 2 of Nuclear envelope pore membrane protein POM 121C OS=Homo sapiens GN=POM121C;>sp|Q96HA1|P121A_HUMAN Nuclear enve	0.865231	9.6798	3.57217e-05	100.58	69.177	1	S	DRRFSRSAIPEQIISSTLSSPSSNAPDPCAK	X;X;X;X;X;X;X;X;X;X;X;X;X;X;X;Phospho (STY);X;X;X;X;X;X;X;X;X;X;X;X;X;X;X	XXXXXXPPPPPPPPPPPPPPPPPPPPPPPPP	SAIPEQIIS(0.001)S(0.865)T(0.093)LS(0.029)S(0.009)PS(0.001)S(0.001)NAPDPCAK	S(-57.25)AIPEQIIS(-27.85)S(9.68)T(-9.68)LS(-14.8)S(-19.74)PS(-29.44)S(-27.9)NAPDPCAK	10	2	0.35153
A8CG34;A8CG34-2;Q96HA1;Q96HA1-2;Q96HA1-3;Q6PJE2;Q6PJE2-5	274;32;297;32;32;32;32	A8CG34;Q96HA1	A8CG34	Nuclear envelope pore membrane protein POM 121C;Nuclear envelope pore membrane protein POM 121;POM121 and ZP3 fusion protein	POM121C;POM121;POMZP3	>sp|A8CG34|P121C_HUMAN Nuclear envelope pore membrane protein POM 121C OS=Homo sapiens GN=POM121C PE=1 SV=2;>sp|A8CG34-2|P121C_HUMAN Isoform 2 of Nuclear envelope pore membrane protein POM 121C OS=Homo sapiens GN=POM121C;>sp|Q96HA1|P121A_HUMAN Nuclear enve	0.715739	5.81455	7.13447e-08	102.43	83.41	1	S	FSRSAIPEQIISSTLSSPSSNAPDPCAKETV	X;X;X;X;X;X;X;X;X;X;X;X;X;X;X;Phospho (STY);X;X;X;X;X;X;X;X;X;X;X;X;X;X;X	XXXPPPPPPPPPPPPPPPPPPPPPPPPPXXX	SAIPEQIIS(0.002)S(0.019)T(0.019)LS(0.716)S(0.188)PS(0.042)S(0.015)NAPDPCAK	S(-43.96)AIPEQIIS(-26.58)S(-15.67)T(-15.67)LS(5.81)S(-5.81)PS(-12.36)S(-16.87)NAPDPCAK	13	3	0.12232			0.48253					0.66376											0.74597
A8CG34;A8CG34-2;Q96HA1;Q96HA1-2;Q96HA1-3;Q6PJE2;Q6PJE2-5	275;33;298;33;33;33;33	A8CG34;Q96HA1	A8CG34	Nuclear envelope pore membrane protein POM 121C;Nuclear envelope pore membrane protein POM 121;POM121 and ZP3 fusion protein	POM121C;POM121;POMZP3	>sp|A8CG34|P121C_HUMAN Nuclear envelope pore membrane protein POM 121C OS=Homo sapiens GN=POM121C PE=1 SV=2;>sp|A8CG34-2|P121C_HUMAN Isoform 2 of Nuclear envelope pore membrane protein POM 121C OS=Homo sapiens GN=POM121C;>sp|Q96HA1|P121A_HUMAN Nuclear enve	0.975935	19.6986	5.91935e-08	104.45	82.51	1	S	SRSAIPEQIISSTLSSPSSNAPDPCAKETVL	X;X;X;X;X;X;X;X;X;X;X;X;X;X;X;Phospho (STY);X;X;X;X;X;X;X;X;X;X;X;X;X;X;X	XXPPPPPPPPPPPPPPPPPPPPPPPPPXXXX	SAIPEQIISSTLS(0.003)S(0.976)PS(0.01)S(0.01)NAPDPCAK	S(-76.65)AIPEQIIS(-51.35)S(-47.08)T(-46.14)LS(-24.99)S(19.7)PS(-19.7)S(-19.7)NAPDPCAK	14	3	0.075805	1.4165	0.68991			0.7154	1.1031				0.31276					0.64821	0.55645	0.70098	0.56842		0.62332	0.85716			0.4944
A8CG34;A8CG34-2;Q96HA1;Q96HA1-2;Q96HA1-3;Q6PJE2;Q6PJE2-5	277;35;300;35;35;35;35	A8CG34;Q96HA1	A8CG34	Nuclear envelope pore membrane protein POM 121C;Nuclear envelope pore membrane protein POM 121;POM121 and ZP3 fusion protein	POM121C;POM121;POMZP3	>sp|A8CG34|P121C_HUMAN Nuclear envelope pore membrane protein POM 121C OS=Homo sapiens GN=POM121C PE=1 SV=2;>sp|A8CG34-2|P121C_HUMAN Isoform 2 of Nuclear envelope pore membrane protein POM 121C OS=Homo sapiens GN=POM121C;>sp|Q96HA1|P121A_HUMAN Nuclear enve	0.838488	10.3891	1.34777e-05	80.082	58.085	1	S	SAIPEQIISSTLSSPSSNAPDPCAKETVLSA	X;X;X;X;X;X;X;X;X;X;X;X;X;X;X;Phospho (STY);X;X;X;X;X;X;X;X;X;X;X;X;X;Phospho (STY);X	PPPPPPPPPPPPPPPPPPPPPPPPPXXXXXX	SAIPEQIIS(0.001)S(0.002)T(0.002)LS(0.018)S(0.063)PS(0.838)S(0.077)NAPDPCAK	S(-49.68)AIPEQIIS(-30.39)S(-26.42)T(-26.42)LS(-16.75)S(-11.27)PS(10.39)S(-10.39)NAPDPCAK	16	3	-0.57009																										0.26349
A8CG34;A8CG34-2;Q96HA1;Q96HA1-2;Q96HA1-3;Q6PJE2;Q6PJE2-5	278;36;301;36;36;36;36	A8CG34;Q96HA1	A8CG34	Nuclear envelope pore membrane protein POM 121C;Nuclear envelope pore membrane protein POM 121;POM121 and ZP3 fusion protein	POM121C;POM121;POMZP3	>sp|A8CG34|P121C_HUMAN Nuclear envelope pore membrane protein POM 121C OS=Homo sapiens GN=POM121C PE=1 SV=2;>sp|A8CG34-2|P121C_HUMAN Isoform 2 of Nuclear envelope pore membrane protein POM 121C OS=Homo sapiens GN=POM121C;>sp|Q96HA1|P121A_HUMAN Nuclear enve	0.761817	8.56707	6.03927e-05	69.272	47.587	1	S	AIPEQIISSTLSSPSSNAPDPCAKETVLSAL	X;X;X;X;X;X;X;X;X;X;X;X;X;X;X;Phospho (STY);X;X;X;X;X;X;X;X;X;X;X;X;Phospho (STY);X;X	PPPPPPPPPPPPPPPPPPPPPPPPXXXXXXX	SAIPEQIIS(0.001)S(0.002)T(0.008)LS(0.106)S(0.067)PS(0.054)S(0.762)NAPDPCAK	S(-43.05)AIPEQIIS(-29.61)S(-24.88)T(-19.83)LS(-8.57)S(-10.55)PS(-11.51)S(8.57)NAPDPCAK	17	3	0.70048
A8CG34;A8CG34-2;Q96HA1;Q96HA1-2;Q96HA1-3;A6NF01	935;693;958;693;693;542	A8CG34;Q96HA1	A8CG34	Nuclear envelope pore membrane protein POM 121C;Nuclear envelope pore membrane protein POM 121;Putative nuclear envelope pore membrane protein POM 121B	POM121C;POM121;POM121B	>sp|A8CG34|P121C_HUMAN Nuclear envelope pore membrane protein POM 121C OS=Homo sapiens GN=POM121C PE=1 SV=2;>sp|A8CG34-2|P121C_HUMAN Isoform 2 of Nuclear envelope pore membrane protein POM 121C OS=Homo sapiens GN=POM121C;>sp|Q96HA1|P121A_HUMAN Nuclear enve	0.800678	8.77542	8.24836e-05	66.004	29.081	1	S	TSTPTFNIPFGSSAKSPLPSYPGANPQPAFG	X;X;X;X;X;X;X;X;X;X;X;X;X;X;X;Phospho (STY);X;X;X;X;X;X;X;X;X;X;X;X;X;X;X	XXXXXXXXXXXXXXXPPPPPPPPPPPPPPPP	S(0.801)PLPS(0.106)Y(0.093)PGANPQPAFGAAEGQPPGAAK	S(8.78)PLPS(-8.78)Y(-9.34)PGANPQPAFGAAEGQPPGAAK	1	3	-0.023035																					0.5086						0.34376
A8CG34;A8CG34-2;Q96HA1;Q96HA1-2;Q96HA1-3;A6NF01	939;697;962;697;697;546	A8CG34;Q96HA1	A8CG34	Nuclear envelope pore membrane protein POM 121C;Nuclear envelope pore membrane protein POM 121;Putative nuclear envelope pore membrane protein POM 121B	POM121C;POM121;POM121B	>sp|A8CG34|P121C_HUMAN Nuclear envelope pore membrane protein POM 121C OS=Homo sapiens GN=POM121C PE=1 SV=2;>sp|A8CG34-2|P121C_HUMAN Isoform 2 of Nuclear envelope pore membrane protein POM 121C OS=Homo sapiens GN=POM121C;>sp|Q96HA1|P121A_HUMAN Nuclear enve	0.488526	0	3.75864e-08	85.337	67.02		S	TFNIPFGSSAKSPLPSYPGANPQPAFGAAEG	X;X;X;X;X;X;X;X;X;X;X;X;X;X;X;Phospho (STY);X;X;X;X;X;X;X;X;X;X;X;X;X;X;X	XXXXXXXXXXXPPPPPPPPPPPPPPPPPPPP	S(0.489)PLPS(0.489)Y(0.023)PGANPQPAFGAAEGQPPGAAK	S(0)PLPS(0)Y(-13.28)PGANPQPAFGAAEGQPPGAAK	5	3	0.37803
Q8IUC4;Q8IUC4-2;A8MT19	652;501;549	Q8IUC4	Q8IUC4	Rhophilin-2;Putative rhophilin-2-like protein RHPN2P1	RHPN2;RHPN2P1	>sp|Q8IUC4|RHPN2_HUMAN Rhophilin-2 OS=Homo sapiens GN=RHPN2 PE=1 SV=1;>sp|Q8IUC4-2|RHPN2_HUMAN Isoform 2 of Rhophilin-2 OS=Homo sapiens GN=RHPN2;>sp|A8MT19|RHN2P_HUMAN Putative rhophilin-2-like protein RHPN2P1 OS=Homo sapiens GN=RHPN2P1 PE=5 SV=2	0.491698	0	0.00101476	103.39	65.452		S	KLSFLSWGTNKNRQKSASTLCLPSVGAARPQ	X;X;X;X;X;X;X;X;X;X;X;X;X;X;X;Phospho (STY);X;X;X;X;X;X;X;X;X;X;X;X;X;X;X	XXXXXXXXXXXXXXXPPPPPPPPPPPPPPPP	S(0.492)AS(0.492)T(0.016)LCLPSVGAARPQVK	S(0)AS(0)T(-14.75)LCLPS(-35.13)VGAARPQVK	1	3	0.75383
Q8IUC4;Q8IUC4-2;A8MT19	654;503;551	Q8IUC4	Q8IUC4	Rhophilin-2;Putative rhophilin-2-like protein RHPN2P1	RHPN2;RHPN2P1	>sp|Q8IUC4|RHPN2_HUMAN Rhophilin-2 OS=Homo sapiens GN=RHPN2 PE=1 SV=1;>sp|Q8IUC4-2|RHPN2_HUMAN Isoform 2 of Rhophilin-2 OS=Homo sapiens GN=RHPN2;>sp|A8MT19|RHN2P_HUMAN Putative rhophilin-2-like protein RHPN2P1 OS=Homo sapiens GN=RHPN2P1 PE=5 SV=2	0.864995	8.65866	0.000634635	103.39	65.452	1	S	SFLSWGTNKNRQKSASTLCLPSVGAARPQVK	X;X;X;X;X;X;X;X;X;X;X;X;X;X;X;Phospho (STY);X;X;X;X;X;X;X;X;X;X;X;X;X;X;X	XXXXXXXXXXXXXPPPPPPPPPPPPPPPPPP	S(0.118)AS(0.865)T(0.017)LCLPSVGAARPQVK	S(-8.66)AS(8.66)T(-17.03)LCLPS(-40.35)VGAARPQVK	3	3	0.44889	0.95645	0.93392						0.47944		0.92555	0.40501
B1AJZ9;B1AJZ9-3;B1AJZ9-4	1263;1263;1227	B1AJZ9	B1AJZ9	Forkhead-associated domain-containing protein 1	FHAD1	>sp|B1AJZ9|FHAD1_HUMAN Forkhead-associated domain-containing protein 1 OS=Homo sapiens GN=FHAD1 PE=2 SV=2;>sp|B1AJZ9-3|FHAD1_HUMAN Isoform 3 of Forkhead-associated domain-containing protein 1 OS=Homo sapiens GN=FHAD1;>sp|B1AJZ9-4|FHAD1_HUMAN Isoform 4 of F	0.999986	48.6981	0.00274894	77.031	43.442	3	S	DMSKTLGSLMNIKNMSGHVSMKYLSRQEREK	X;X;X;X;X;X;X;X;X;X;X;X;X;X;Oxidation (M);Phospho (STY);X;X;X;Phospho (STY);X;X;X;X;Phospho (STY);X;X;X;X;X;X	XXXXXXXXXXXXXPPPPPPPPPPPPPXXXXX	NMS(1)GHVS(0.991)MKY(0.021)LS(0.988)R	NMS(48.7)GHVS(20.61)MKY(-19.1)LS(19.1)R	3	2	0.36992
B1AJZ9;B1AJZ9-3;B1AJZ9-4	1267;1267;1231	B1AJZ9	B1AJZ9	Forkhead-associated domain-containing protein 1	FHAD1	>sp|B1AJZ9|FHAD1_HUMAN Forkhead-associated domain-containing protein 1 OS=Homo sapiens GN=FHAD1 PE=2 SV=2;>sp|B1AJZ9-3|FHAD1_HUMAN Isoform 3 of Forkhead-associated domain-containing protein 1 OS=Homo sapiens GN=FHAD1;>sp|B1AJZ9-4|FHAD1_HUMAN Isoform 4 of F	0.997482	25.0811	0.00274894	77.031	43.442	3	S	TLGSLMNIKNMSGHVSMKYLSRQEREKVNQL	X;X;X;X;X;X;X;X;X;X;Oxidation (M);Phospho (STY);X;X;X;Phospho (STY);X;X;X;X;Phospho (STY);X;X;X;X;X;X;X;X;X;X	XXXXXXXXXPPPPPPPPPPPPPXXXXXXXXX	NMS(1)GHVS(0.997)MKY(0.191)LS(0.812)R	NMS(42.25)GHVS(25.08)MKY(-6.32)LS(6.32)R	7	2	0.53207
B1AJZ9;B1AJZ9-3;B1AJZ9-4	1272;1272;1236	B1AJZ9	B1AJZ9	Forkhead-associated domain-containing protein 1	FHAD1	>sp|B1AJZ9|FHAD1_HUMAN Forkhead-associated domain-containing protein 1 OS=Homo sapiens GN=FHAD1 PE=2 SV=2;>sp|B1AJZ9-3|FHAD1_HUMAN Isoform 3 of Forkhead-associated domain-containing protein 1 OS=Homo sapiens GN=FHAD1;>sp|B1AJZ9-4|FHAD1_HUMAN Isoform 4 of F	0.987937	19.0951	0.00274894	77.031	43.442	3	S	MNIKNMSGHVSMKYLSRQEREKVNQLRQRDL	X;X;X;X;X;Oxidation (M);Phospho (STY);X;X;X;Phospho (STY);X;X;X;X;Phospho (STY);X;X;X;X;X;X;X;X;X;X;X;X;X;X;X	XXXXPPPPPPPPPPPPPXXXXXXXXXXXXXX	NMS(1)GHVS(0.991)MKY(0.021)LS(0.988)R	NMS(48.7)GHVS(20.61)MKY(-19.1)LS(19.1)R	12	2	0.36992
C9JH25;C9JH25-3	856;650	C9JH25	C9JH25	Proline-rich transmembrane protein 4	PRRT4	>sp|C9JH25|PRRT4_HUMAN Proline-rich transmembrane protein 4 OS=Homo sapiens GN=PRRT4 PE=2 SV=1;>sp|C9JH25-3|PRRT4_HUMAN Isoform 3 of Proline-rich transmembrane protein 4 OS=Homo sapiens GN=PRRT4	0.809974	6.63751	0.00433239	61.657	25.894	1	S	GSSPSLPASGSYQALSPPSRDSPEPASELQA	X;X;X;X;X;X;X;X;X;X;X;X;X;X;X;Phospho (STY);X;X;X;X;X;X;X;X;X;X;X;X;X;X;X	PPPPPPPPPPPPPPPPPPPPXXXXXXXXXXX	PSGSSPSLPASGS(0.007)Y(0.007)QALS(0.81)PPS(0.176)R	PS(-61.5)GS(-59.23)S(-55.44)PS(-46.26)LPAS(-32.53)GS(-20.67)Y(-20.67)QALS(6.64)PPS(-6.64)R	18	3	0.4509
Q01628;C9JQL5	10;10	Q01628	Q01628	Interferon-induced transmembrane protein 3;Putative dispanin subfamily A member 2d	IFITM3	>sp|Q01628|IFM3_HUMAN Interferon-induced transmembrane protein 3 OS=Homo sapiens GN=IFITM3 PE=1 SV=2;>sp|C9JQL5|DSA2D_HUMAN Putative dispanin subfamily A member 2d OS=Homo sapiens PE=5 SV=1	0.99999	53.078	1.08591e-87	208.45	166.52	1	S	______MNHTVQTFFSPVNSGQPPNYEMLKE	X;X;X;X;X;X;Oxidation (M);X;X;X;X;X;X;X;X;Phospho (STY);X;X;X;X;X;X;X;X;X;X;X;Oxidation (M);X;X;X	XXXXXXPPPPPPPPPPPPPPPPPPPPPPPPX	MNHTVQTFFS(1)PVNSGQPPNYEMLK	MNHT(-53.08)VQT(-53.08)FFS(53.08)PVNS(-70.03)GQPPNY(-112.86)EMLK	10	2	0.97083
CON__ENSEMBL:ENSBTAP00000038253	564	CON__ENSEMBL:ENSBTAP00000038253	CON__ENSEMBL:ENSBTAP00000038253			>ENSEMBL:ENSBTAP00000038253 (Bos taurus) 63 kDa protein	0.998179	28.2596	0.00123097	76.868	48.319	2	S	SYGSGGGSSGSRRGGSGGGGGSSGGSFISSG	X;X;X;X;X;X;X;X;X;X;X;X;X;X;X;Phospho (STY);X;X;X;X;X;X;X;X;X;X;X;X;Phospho (STY);X;X	XXXXXXXXXXXXPPPPPPPPPPPPPPPPPPP	RGGS(0.998)GGGGGS(0.002)SGGSFIS(0.968)S(0.032)GGR	RGGS(28.26)GGGGGS(-28.26)S(-39.17)GGS(-39.17)FIS(14.79)S(-14.79)GGR	4	3	0.93658
CON__ENSEMBL:ENSBTAP00000038253	577	CON__ENSEMBL:ENSBTAP00000038253	CON__ENSEMBL:ENSBTAP00000038253			>ENSEMBL:ENSBTAP00000038253 (Bos taurus) 63 kDa protein	0.967566	14.7866	0.00123097	76.868	48.319	2	S	GGSGGGGGSSGGSFISSGGRASSTKTSGGSS	X;X;Phospho (STY);X;X;X;X;X;X;X;X;X;X;X;X;Phospho (STY);X;X;X;X;X;X;X;X;X;X;X;X;X;X;X	PPPPPPPPPPPPPPPPPPPPXXXXXXXXXXX	RGGS(0.998)GGGGGS(0.002)SGGSFIS(0.968)S(0.032)GGR	RGGS(28.26)GGGGGS(-28.26)S(-39.17)GGS(-39.17)FIS(14.79)S(-14.79)GGR	17	3	0.93658
CON__P01045-1;CON__Q2KJ62;CON__P01044-1	329;331;331	CON__P01045-1	CON__P01045-1			>P01045-1 SWISS-PROT:P01045-1 (Bos taurus) Isoform HMW of Kininogen-2 precursor;>Q2KJ62 TREMBL:Q2KJ62 (Bos taurus) KNG protein;>P01044-1 SWISS-PROT:P01044-1 (Bos taurus) Isoform HMW of Kininogen-1 precursor	0.999999	60.6239	0.000843174	250.72	198.36	1	S	YSIVFIARETTCSKGSNEELTKSCEINIHGQ	X;X;X;X;X;X;X;X;X;X;X;X;X;X;X;Phospho (STY);X;X;X;X;X;X;X;X;X;X;X;X;X;X;X	XXXXXXXXPPPPPPPPPPPPPPXXXXXXXXX	ETTCSKGS(1)NEELTK	ET(-115.26)T(-105.03)CS(-60.62)KGS(60.62)NEELT(-160.29)K	8	3	0.20707			0.40111	1.4114		1.1703							1.4681	1.3458			1.2575						1.7096	1.5957	1.1555	0.54937	1.1106	1.0304
CON__P02662	46	CON__P02662	CON__P02662			>P02662 SWISS-PROT:P02662 Alpha-S1-casein - Bos taurus (Bovine).	1	76.47	1.91261e-24	308.55	273.9	2	S	VFGKEKVNELSKDIGSESTEDQAMEDIKQME	X;X;X;X;X;X;X;X;X;X;X;X;X;X;X;Phospho (STY);X;Phospho (STY);Phospho (STY);X;X;X;X;Oxidation (M);X;X;X;X;X;X;X	XXXXXXXXXXXXPPPPPPPPPPPPPPPPXXX	DIGS(1)ES(0.995)T(0.005)EDQAMEDIK	DIGS(76.47)ES(23.32)T(-23.32)EDQAMEDIK	4	3	-0.56976							3.5961					2.5275			0.72316			12.345	0.48008	0.86325	0.3723		2.1531	0.59129		0.90519	0.50968
CON__P02662	48	CON__P02662	CON__P02662			>P02662 SWISS-PROT:P02662 Alpha-S1-casein - Bos taurus (Bovine).	0.99993	41.5308	1.91261e-24	308.55	273.9	2	S	GKEKVNELSKDIGSESTEDQAMEDIKQMEAE	X;X;X;X;X;X;X;X;X;X;X;X;X;Phospho (STY);X;Phospho (STY);X;X;X;X;X;Oxidation (M);X;X;X;X;X;X;X;X;X	XXXXXXXXXXPPPPPPPPPPPPPPPPXXXXX	DIGS(1)ES(1)TEDQAMEDIK	DIGS(112.28)ES(41.53)T(-41.53)EDQAMEDIK	6	3	-0.26102							3.5961					2.5275			0.67161			12.345		0.92855			2.1531	0.64705		0.90519	0.45885
CON__P02662	115	CON__P02662	CON__P02662			>P02662 SWISS-PROT:P02662 Alpha-S1-casein - Bos taurus (Bovine).	1	92.4086	8.48711e-19	382.39	318.96	1	S	RLKKYKVPQLEIVPNSAEERLHSMKEGIHAQ	X;X;X;X;X;X;X;X;X;X;X;X;X;X;X;Phospho (STY);X;X;X;X;X;X;X;Oxidation (M);X;X;X;X;X;X;X	XXXXPPPPPPPPPPPPPPPPPPPPPXXXXXX	YKVPQLEIVPNS(1)AEER	Y(-92.41)KVPQLEIVPNS(92.41)AEER	12	3	-0.29044		1.8646				1.2275	3.8997				0.504		0.81764	1.1825	0.81042	0.46765		19.382	0.76777	1.0376	0.43685		3.3642	1.1461	0.37231	0.49512	0.53313
CON__P02663	129	CON__P02663	CON__P02663			>P02663 SWISS-PROT:P02663 Alpha-S2-casein [Contains: Casocidin-1 - Bos taurus (Bovine).	0.758032	4.62053	0.00153088	73.722	54.858	2	S	RNAVPITPTLNREQLSTSEENSKKTVDMEST	X;X;X;X;X;X;X;X;X;X;X;X;X;X;X;Phospho (STY);Phospho (STY);Phospho (STY);X;X;X;X;X;X;X;X;X;Oxidation (M);X;Phospho (STY);Phospho (STY)	PPPPPPPPPPPPPPPPPPPPPPPPXXXXXXX	RNAVPIT(0.001)PT(0.002)LNREQLS(0.758)T(0.303)S(0.935)EENS(0.002)K	RNAVPIT(-31.81)PT(-28.98)LNREQLS(4.62)T(-4.62)S(10.42)EENS(-28.06)K	16	3	0.40913
CON__P02663	131	CON__P02663	CON__P02663			>P02663 SWISS-PROT:P02663 Alpha-S2-casein [Contains: Casocidin-1 - Bos taurus (Bovine).	0.934593	10.4186	0.00153088	73.722	54.858	2	S	AVPITPTLNREQLSTSEENSKKTVDMESTEV	X;X;X;X;X;X;X;X;X;X;X;X;X;Phospho (STY);X;Phospho (STY);X;X;X;X;X;X;X;X;X;Oxidation (M);X;Phospho (STY);Phospho (STY);X;X	PPPPPPPPPPPPPPPPPPPPPPXXXXXXXXX	RNAVPIT(0.001)PT(0.002)LNREQLS(0.758)T(0.303)S(0.935)EENS(0.002)K	RNAVPIT(-31.81)PT(-28.98)LNREQLS(4.62)T(-4.62)S(10.42)EENS(-28.06)K	18	3	0.40913
CON__P02663	143	CON__P02663	CON__P02663			>P02663 SWISS-PROT:P02663 Alpha-S2-casein [Contains: Casocidin-1 - Bos taurus (Bovine).	0.99277	21.3773	1.07786e-08	152.94	113.31	1	S	LSTSEENSKKTVDMESTEVFTKKTKLTEEEK	X;Phospho (STY);Phospho (STY);Phospho (STY);X;X;X;X;X;X;X;X;X;Oxidation (M);X;Phospho (STY);X;X;X;X;X;X;X;X;X;X;X;X;X;X;X	XXXXXXXXXXPPPPPPPPPPPPXXXXXXXXX	TVDMES(0.993)T(0.007)EVFTK	T(-69.32)VDMES(21.38)T(-21.38)EVFT(-66.49)K	6	2	0.43052																		19.337					4.832			1.0035
CON__P02666	35	CON__P02666	CON__P02666			>P02666 SWISS-PROT:P02666 Beta-casein - Bos taurus (Bovine).	1	105.974	0	389.57	366.47	1	S	EESITRINKKIEKFQSEEQQQTEDELQDKIH	X;X;X;X;X;X;X;X;X;X;X;X;X;X;X;Phospho (STY);X;X;X;X;X;X;X;X;X;X;X;X;X;X;X	XXXXXXXXXXXXXPPPPPPPPPPPPPPPPXX	FQS(1)EEQQQTEDELQDK	FQS(105.97)EEQQQT(-105.97)EDELQDK	3	2	-0.10437	0.73837	1.7401	0.37258		0.83958	1.4141	4.938	0.78091			0.67728	3.0073	0.75868	0.83948	0.77467	0.32214	0.29582	17.286	0.65248	0.91906	0.43391	0.35986	2.6569	0.69446	0.42081	1.1873	0.60162	0.26018
P05787;CON__P05787;P05787-2	21;21;49	P05787	P05787	Keratin, type II cytoskeletal 8	KRT8	>sp|P05787|K2C8_HUMAN Keratin, type II cytoskeletal 8 OS=Homo sapiens GN=KRT8 PE=1 SV=7;>P05787 SWISS-PROT:P05787 Tax_Id=9606 Gene_Symbol=KRT8 Keratin, type II cytoskeletal 8;>sp|P05787-2|K2C8_HUMAN Isoform 2 of Keratin, type II cytoskeletal 8 OS=Homo sapi	0.999997	55.8797	3.01348e-08	283.82	238.74	1;2	S	TQKSYKVSTSGPRAFSSRSYTSGPGSRISSS	X;X;X;X;X;X;X;Phospho (STY);Phospho (STY);Phospho (STY);X;X;X;X;X;Phospho (STY);Phospho (STY);X;Phospho (STY);X;Phospho (STY);Phospho (STY);X;X;X;Phospho (STY);X;X;Phospho (STY);Phospho (STY);Phospho (STY)	XXXXXXPPPPPPPPPPPPPPPPPPPPPXXXX	AFS(1)SRS(1)YTSGPGSR	AFS(55.88)S(-55.88)RS(34.19)Y(-34.19)T(-76.7)S(-124.89)GPGS(-196.84)R	3	3	0.15223	0.83218	0.36064	0.42473	0.25318	0.21461	0.24212	0.13975	0.16064	0.10135	0.09035	0.066003	0.047004	0.067045	0.072092	0.8157	0.56105	0.35651	0.37326	0.36851	0.30421	0.26505	0.29112	0.23961	0.18615	0.18451	0.96905	0.23351	0.73635
P05787;CON__P05787;P05787-2	22;22;50	P05787	P05787	Keratin, type II cytoskeletal 8	KRT8	>sp|P05787|K2C8_HUMAN Keratin, type II cytoskeletal 8 OS=Homo sapiens GN=KRT8 PE=1 SV=7;>P05787 SWISS-PROT:P05787 Tax_Id=9606 Gene_Symbol=KRT8 Keratin, type II cytoskeletal 8;>sp|P05787-2|K2C8_HUMAN Isoform 2 of Keratin, type II cytoskeletal 8 OS=Homo sapi	0.966326	15.3871	1.08031e-05	131.45	107.81	1;2	S	QKSYKVSTSGPRAFSSRSYTSGPGSRISSSS	X;X;X;X;X;X;Phospho (STY);Phospho (STY);Phospho (STY);X;X;X;X;X;Phospho (STY);Phospho (STY);X;Phospho (STY);X;Phospho (STY);Phospho (STY);X;X;X;Phospho (STY);X;X;Phospho (STY);Phospho (STY);Phospho (STY);Phospho (STY)	XXXXXXXXXXXXPPPPPPPPPPPPPPPPPPP	AFS(0.028)S(0.966)RS(0.004)YT(0.002)SGPGSR	AFS(-15.39)S(15.39)RS(-23.72)Y(-69.37)T(-27.79)S(-48.04)GPGS(-81.2)R	4	2	0.052052		0.36637			0.61014		0.13867			0.42559		0.18312	0.3577	0.31442	0.6796					0.30005	0.2553		0.41484		0.49858		0.32856
P05787;CON__P05787;P05787-2	24;24;52	P05787	P05787	Keratin, type II cytoskeletal 8	KRT8	>sp|P05787|K2C8_HUMAN Keratin, type II cytoskeletal 8 OS=Homo sapiens GN=KRT8 PE=1 SV=7;>P05787 SWISS-PROT:P05787 Tax_Id=9606 Gene_Symbol=KRT8 Keratin, type II cytoskeletal 8;>sp|P05787-2|K2C8_HUMAN Isoform 2 of Keratin, type II cytoskeletal 8 OS=Homo sapi	1	63.7678	4.21143e-09	361.61	277.32	1;2	S	SYKVSTSGPRAFSSRSYTSGPGSRISSSSFS	X;X;X;X;Phospho (STY);Phospho (STY);Phospho (STY);X;X;X;X;X;Phospho (STY);Phospho (STY);X;Phospho (STY);X;Phospho (STY);Phospho (STY);X;X;X;Phospho (STY);X;X;Phospho (STY);Phospho (STY);Phospho (STY);Phospho (STY);X;Phospho (STY)	XXXPPPPPPPPPPPPPPPPPPPPPPPPPPPP	AFSSRS(1)YTSGPGSR	AFS(-164.37)S(-110.68)RS(63.77)Y(-63.77)T(-110.68)S(-164.37)GPGS(-261.24)R	6	3	-0.036614	0.78704	0.73901	0.4114	0.72963	0.58276	0.73364	0.61894	0.67466	0.49197	0.41828	0.36768	0.23704	0.36096	0.30932	0.84542	0.45252	0.3249	0.27351	0.38142	0.21696	0.18222	0.32928	0.26625	0.19875	0.28128	0.85625	0.22144	0.68732
P05787;CON__P05787;P05787-2	27;27;55	P05787	P05787	Keratin, type II cytoskeletal 8	KRT8	>sp|P05787|K2C8_HUMAN Keratin, type II cytoskeletal 8 OS=Homo sapiens GN=KRT8 PE=1 SV=7;>P05787 SWISS-PROT:P05787 Tax_Id=9606 Gene_Symbol=KRT8 Keratin, type II cytoskeletal 8;>sp|P05787-2|K2C8_HUMAN Isoform 2 of Keratin, type II cytoskeletal 8 OS=Homo sapi	0.999998	56.9827	0.000867387	284.91	251.59	1;2	S	VSTSGPRAFSSRSYTSGPGSRISSSSFSRVG	X;Phospho (STY);Phospho (STY);Phospho (STY);X;X;X;X;X;Phospho (STY);X;X;Phospho (STY);X;Phospho (STY);Phospho (STY);X;X;X;X;X;X;Phospho (STY);Phospho (STY);Phospho (STY);Phospho (STY);X;Phospho (STY);X;X;X	XXXXXXXPPPPPPPPPPPPPPPPPPPPPPXX	AFSSRS(1)YTS(1)GPGSR	AFS(-141.87)S(-102.14)RS(46.03)Y(-46.03)T(-56.98)S(56.98)GPGS(-102.14)R	9	3	0.34719	0.94108	0.50151	0.28247	0.47596	0.37267	0.37098	0.28528	0.33979	0.35367	0.3297	0.17335				0.79491	0.56241	0.47083	0.50266	0.48052	0.32491	0.33463	0.42952	0.85523	0.73023	0.86764	0.58003	0.52474	0.093244
P05787;CON__P05787;P05787-2	31;31;59	P05787	P05787	Keratin, type II cytoskeletal 8	KRT8	>sp|P05787|K2C8_HUMAN Keratin, type II cytoskeletal 8 OS=Homo sapiens GN=KRT8 PE=1 SV=7;>P05787 SWISS-PROT:P05787 Tax_Id=9606 Gene_Symbol=KRT8 Keratin, type II cytoskeletal 8;>sp|P05787-2|K2C8_HUMAN Isoform 2 of Keratin, type II cytoskeletal 8 OS=Homo sapi	1	82.9157	2.33997e-05	278.36	237.64	1;2	S	GPRAFSSRSYTSGPGSRISSSSFSRVGSSNF	X;X;X;X;X;Phospho (STY);X;X;Phospho (STY);X;X;X;X;X;X;Phospho (STY);X;X;Phospho (STY);Phospho (STY);Phospho (STY);Phospho (STY);X;Phospho (STY);X;X;X;Phospho (STY);Phospho (STY);X;X	XXXPPPPPPPPPPPPPPPPPPPPPPXXXXXX	SYTSGPGS(1)RISSSSFSR	S(-151.31)Y(-142.75)T(-115.72)S(-96.61)GPGS(82.92)RIS(-82.92)S(-110.2)S(-142.75)S(-174.15)FS(-208.38)R	8	3	-0.11184	0.83472	0.63398		0.49561	0.58177	0.73665	0.44936	0.75526
P05787;CON__P05787;P05787-2	34;34;62	P05787	P05787	Keratin, type II cytoskeletal 8	KRT8	>sp|P05787|K2C8_HUMAN Keratin, type II cytoskeletal 8 OS=Homo sapiens GN=KRT8 PE=1 SV=7;>P05787 SWISS-PROT:P05787 Tax_Id=9606 Gene_Symbol=KRT8 Keratin, type II cytoskeletal 8;>sp|P05787-2|K2C8_HUMAN Isoform 2 of Keratin, type II cytoskeletal 8 OS=Homo sapi	0.999996	54.4574	4.21143e-09	345.3	295.96	1;2	S	AFSSRSYTSGPGSRISSSSFSRVGSSNFRGG	X;X;Phospho (STY);Phospho (STY);X;Phospho (STY);Phospho (STY);Phospho (STY);Phospho (STY);X;X;X;X;X;X;Phospho (STY);Phospho (STY);Phospho (STY);Phospho (STY);X;X;X;X;X;Phospho (STY);Phospho (STY);X;X;X;X;X	PPPPPPPPPPPPPPPPPPPPPPPPPPPPPXX	SYTSGPGSRIS(1)SSSFSR	S(-219.75)Y(-205.63)T(-190.69)S(-158.04)GPGS(-64.81)RIS(54.46)S(-54.46)S(-84.99)S(-129.29)FS(-186.61)R	11	3	-0.00029267	0.89643	0.71897	0.43361	0.87263	0.85585	1.2793	1.4281	1.44	4.4447	4.4495	4.1801	2.3743	3.3428	2.288	0.86781	0.43615	0.31404	0.47005	0.58871	0.54939	0.52575	1.2082	1.3839	1.437	2.3609	15.987	4.9758	12.164
P05787;CON__P05787;P05787-2	35;35;63	P05787	P05787	Keratin, type II cytoskeletal 8	KRT8	>sp|P05787|K2C8_HUMAN Keratin, type II cytoskeletal 8 OS=Homo sapiens GN=KRT8 PE=1 SV=7;>P05787 SWISS-PROT:P05787 Tax_Id=9606 Gene_Symbol=KRT8 Keratin, type II cytoskeletal 8;>sp|P05787-2|K2C8_HUMAN Isoform 2 of Keratin, type II cytoskeletal 8 OS=Homo sapi	0.636806	6.09766	0.00089155	147.3	112.27	1	S	FSSRSYTSGPGSRISSSSFSRVGSSNFRGGL	X;Phospho (STY);Phospho (STY);X;Phospho (STY);Phospho (STY);Phospho (STY);Phospho (STY);X;X;X;X;X;X;Phospho (STY);Phospho (STY);X;X;X;X;X;X;X;Phospho (STY);Phospho (STY);X;X;X;X;X;X	XXXXPPPPPPPPPPPPPPPPPPPPPPPPXXX	IS(0.156)S(0.637)S(0.156)S(0.041)FS(0.009)RVGSSNFR	IS(-6.1)S(6.1)S(-6.1)S(-11.89)FS(-18.62)RVGS(-33.28)S(-37.32)NFR	3	2	0.62413
P05787;CON__P05787;P05787-2	36;36;64	P05787	P05787	Keratin, type II cytoskeletal 8	KRT8	>sp|P05787|K2C8_HUMAN Keratin, type II cytoskeletal 8 OS=Homo sapiens GN=KRT8 PE=1 SV=7;>P05787 SWISS-PROT:P05787 Tax_Id=9606 Gene_Symbol=KRT8 Keratin, type II cytoskeletal 8;>sp|P05787-2|K2C8_HUMAN Isoform 2 of Keratin, type II cytoskeletal 8 OS=Homo sapi	0.745369	6.25905	0.000445368	169.65	126.71	1	S	SSRSYTSGPGSRISSSSFSRVGSSNFRGGLG	Phospho (STY);Phospho (STY);X;Phospho (STY);Phospho (STY);Phospho (STY);Phospho (STY);X;X;X;X;X;X;Phospho (STY);X;Phospho (STY);X;X;X;X;X;X;Phospho (STY);Phospho (STY);X;X;X;X;X;X;X	XXXPPPPPPPPPPPPPPPPPXXXXXXXXXXX	IS(0.019)S(0.044)S(0.745)S(0.176)FS(0.015)R	IS(-15.85)S(-12.29)S(6.26)S(-6.26)FS(-16.99)R	4	2	0.1768
P05787;CON__P05787;P05787-2	37;37;65	P05787	P05787	Keratin, type II cytoskeletal 8	KRT8	>sp|P05787|K2C8_HUMAN Keratin, type II cytoskeletal 8 OS=Homo sapiens GN=KRT8 PE=1 SV=7;>P05787 SWISS-PROT:P05787 Tax_Id=9606 Gene_Symbol=KRT8 Keratin, type II cytoskeletal 8;>sp|P05787-2|K2C8_HUMAN Isoform 2 of Keratin, type II cytoskeletal 8 OS=Homo sapi	0.999985	48.6885	4.70119e-05	302.2	261.52	1;2	S	SRSYTSGPGSRISSSSFSRVGSSNFRGGLGG	Phospho (STY);X;Phospho (STY);Phospho (STY);Phospho (STY);Phospho (STY);X;X;X;X;X;X;Phospho (STY);X;X;Phospho (STY);X;X;X;X;X;Phospho (STY);Phospho (STY);X;X;X;X;X;X;X;X	XXPPPPPPPPPPPPPPPPPPPPPPPPXXXXX	SYTSGPGSRIS(1)SSS(1)FSR	S(-192.57)Y(-179.29)T(-154.88)S(-127.97)GPGS(-46.14)RIS(35.61)S(-35.61)S(-48.69)S(48.69)FS(-67.92)R	14	3	0.21779																								0.5387	0.7582			0.51363
P05787;CON__P05787;P05787-2	39;39;67	P05787	P05787	Keratin, type II cytoskeletal 8	KRT8	>sp|P05787|K2C8_HUMAN Keratin, type II cytoskeletal 8 OS=Homo sapiens GN=KRT8 PE=1 SV=7;>P05787 SWISS-PROT:P05787 Tax_Id=9606 Gene_Symbol=KRT8 Keratin, type II cytoskeletal 8;>sp|P05787-2|K2C8_HUMAN Isoform 2 of Keratin, type II cytoskeletal 8 OS=Homo sapi	1	79.2358	4.89726e-22	319.06	274.74	1	S	SYTSGPGSRISSSSFSRVGSSNFRGGLGGGY	Phospho (STY);Phospho (STY);Phospho (STY);Phospho (STY);X;X;X;X;X;X;X;X;X;X;X;Phospho (STY);X;X;X;Phospho (STY);Phospho (STY);X;X;X;X;X;X;X;X;X;X	XXXXXXXXXPPPPPPPPPPPPPPPXXXXXXX	ISSSSFS(1)RVGSSNFR	IS(-180.95)S(-158.06)S(-120.62)S(-79.24)FS(79.24)RVGS(-138.7)S(-175.47)NFR	7	3	-0.11137	1.024		0.22372					0.25087	0.19453	0.18766	0.15208	0.11637	0.21682		0.85245	0.57403	0.30111	0.26425	0.42338	0.26124	0.19859					0.32874		0.31522
P05787;CON__P05787;P05787-2;CON__Q8BGZ7;O95678;CON__O95678	274;274;302;335;334;334	P05787	P05787	Keratin, type II cytoskeletal 8;Keratin, type II cytoskeletal 75	KRT8;KRT75	>sp|P05787|K2C8_HUMAN Keratin, type II cytoskeletal 8 OS=Homo sapiens GN=KRT8 PE=1 SV=7;>P05787 SWISS-PROT:P05787 Tax_Id=9606 Gene_Symbol=KRT8 Keratin, type II cytoskeletal 8;>sp|P05787-2|K2C8_HUMAN Isoform 2 of Keratin, type II cytoskeletal 8 OS=Homo sapi	1	92.5964	0.00012961	186.58	170.22	1	S	IIAEVKAQYEDIANRSRAEAESMYQIKYEEL	X;X;X;X;X;X;X;X;X;X;X;X;X;X;X;Phospho (STY);X;X;X;X;X;X;X;X;X;X;X;X;X;X;X	XXXXXXPPPPPPPPPPPPPPPPPPPPPXXXX	AQYEDIANRS(1)RAEAESMYQIK	AQY(-100.54)EDIANRS(92.6)RAEAES(-92.6)MY(-130.87)QIK	10	4	-0.035698	0.88895			1.0777	0.96459	0.93004	0.83292	0.88919	1.0231	0.8193	0.72922	0.55267	0.80731	0.58872	0.96753	0.80213	0.64875	0.92523	0.85275	0.58332	0.51637	0.79906	0.41877	0.51834	0.76499	0.85747	0.67423	0.82248
P05787;CON__P05787;P05787-2	280;280;308	P05787	P05787	Keratin, type II cytoskeletal 8	KRT8	>sp|P05787|K2C8_HUMAN Keratin, type II cytoskeletal 8 OS=Homo sapiens GN=KRT8 PE=1 SV=7;>P05787 SWISS-PROT:P05787 Tax_Id=9606 Gene_Symbol=KRT8 Keratin, type II cytoskeletal 8;>sp|P05787-2|K2C8_HUMAN Isoform 2 of Keratin, type II cytoskeletal 8 OS=Homo sapi	0.919859	10.6601	0.00274637	109	87.577	1	S	AQYEDIANRSRAEAESMYQIKYEELQSLAGK	X;X;X;X;X;X;X;X;X;Phospho (STY);X;X;X;X;X;Phospho (STY);X;X;X;X;X;X;X;X;X;X;Phospho (STY);X;X;X;X	PPPPPPPPPPPPPPPPPPPPPXXXXXXXXXX	AQYEDIANRS(0.079)RAEAES(0.92)MY(0.001)QIK	AQY(-78.04)EDIANRS(-10.66)RAEAES(10.66)MY(-29.12)QIK	16	4	0.23467
P05787;CON__P05787;P05787-2	404;404;432	P05787	P05787	Keratin, type II cytoskeletal 8	KRT8	>sp|P05787|K2C8_HUMAN Keratin, type II cytoskeletal 8 OS=Homo sapiens GN=KRT8 PE=1 SV=7;>P05787 SWISS-PROT:P05787 Tax_Id=9606 Gene_Symbol=KRT8 Keratin, type II cytoskeletal 8;>sp|P05787-2|K2C8_HUMAN Isoform 2 of Keratin, type II cytoskeletal 8 OS=Homo sapi	0.999978	47.8626	6.69474e-05	122.46	90.688	1	S	ATYRKLLEGEESRLESGMQNMSIHTKTTSGY	X;X;X;X;X;X;X;X;X;X;X;X;X;X;X;Phospho (STY);X;Oxidation (M);X;X;X;X;X;X;X;X;X;X;X;X;X	XXXXXPPPPPPPPPPPPPPPPPPPPPXXXXX	LLEGEESRLES(1)GMQNMSIHTK	LLEGEES(-47.86)RLES(47.86)GMQNMS(-52.88)IHT(-67.76)K	11	4	-0.11468	1.4901												0.37967
P05787;CON__P05787;P05787-2	410;410;438	P05787	P05787	Keratin, type II cytoskeletal 8	KRT8	>sp|P05787|K2C8_HUMAN Keratin, type II cytoskeletal 8 OS=Homo sapiens GN=KRT8 PE=1 SV=7;>P05787 SWISS-PROT:P05787 Tax_Id=9606 Gene_Symbol=KRT8 Keratin, type II cytoskeletal 8;>sp|P05787-2|K2C8_HUMAN Isoform 2 of Keratin, type II cytoskeletal 8 OS=Homo sapi	1	104.479	1.68931e-06	269.14	205.98	1;2	S	LEGEESRLESGMQNMSIHTKTTSGYAGGLSS	X;X;X;X;X;Phospho (STY);X;X;X;X;X;Oxidation (M);X;X;Oxidation (M);Phospho (STY);X;X;X;X;X;X;X;X;X;X;X;X;X;X;Phospho (STY)	PPPPPPPPPPPPPPPPPPPPXXXXXXXXXXX	LESGMQNMS(1)IHTK	LES(-158.23)GMQNMS(104.48)IHT(-104.48)K	9	3	-0.26611	0.8934	0.88267	0.62709	0.53265	0.71569	1.0391	0.68979	0.90205		0.53558	0.3308		0.26235		0.65531	0.67201	0.92697	0.88252	0.8841	0.8251	0.69635	0.70761	0.92096	0.70892	0.79391	0.566	0.36859	0.48742
P05787;CON__P05787;P05787-2	400;400;428	P05787	P05787	Keratin, type II cytoskeletal 8	KRT8	>sp|P05787|K2C8_HUMAN Keratin, type II cytoskeletal 8 OS=Homo sapiens GN=KRT8 PE=1 SV=7;>P05787 SWISS-PROT:P05787 Tax_Id=9606 Gene_Symbol=KRT8 Keratin, type II cytoskeletal 8;>sp|P05787-2|K2C8_HUMAN Isoform 2 of Keratin, type II cytoskeletal 8 OS=Homo sapi	0.999976	46.204	9.45476e-06	162.37	138.94	1;2	S	DIEIATYRKLLEGEESRLESGMQNMSIHTKT	X;X;X;X;X;X;X;X;X;X;X;X;X;X;X;Phospho (STY);X;X;X;X;X;Oxidation (M);X;X;Oxidation (M);Phospho (STY);X;X;X;X;X	XXXXXXXXXPPPPPPPPPPPPPPPPPPPPPX	LLEGEES(1)RLESGMQNMSIHTK	LLEGEES(46.2)RLES(-46.2)GMQNMS(-84.17)IHT(-88.15)K	7	4	-0.2337	1.2515	0.84571	0.56212	0.78243	0.73037	0.76229	0.70506	1.668					0.38507				0.34339					0.53769	0.92566		0.99355
P05787;CON__P05787;P05787-2	475;475;503	P05787	P05787	Keratin, type II cytoskeletal 8	KRT8	>sp|P05787|K2C8_HUMAN Keratin, type II cytoskeletal 8 OS=Homo sapiens GN=KRT8 PE=1 SV=7;>P05787 SWISS-PROT:P05787 Tax_Id=9606 Gene_Symbol=KRT8 Keratin, type II cytoskeletal 8;>sp|P05787-2|K2C8_HUMAN Isoform 2 of Keratin, type II cytoskeletal 8 OS=Homo sapi	0.999907	40.5227	3.92918e-06	130.19	104.21	1	S	AVVVKKIETRDGKLVSESSDVLPK_______	X;X;X;X;X;X;X;X;X;X;X;X;X;X;X;Phospho (STY);X;X;X;X;X;X;X;X;X;X;X;X;X;X;X	XXXXXXXXXXXXXPPPPPPPPPPPXXXXXXX	LVS(1)ESSDVLPK	LVS(40.52)ES(-40.52)S(-53.83)DVLPK	3	2	0.47157	0.66592		0.36344	0.59706	0.58127	0.7644	0.57947		0.53618						0.98834		0.61828	0.48326		0.66222	0.5573	0.73951	0.64323	0.60898	0.45898		0.61984
P05787;CON__P05787;P05787-2	477;477;505	P05787	P05787	Keratin, type II cytoskeletal 8	KRT8	>sp|P05787|K2C8_HUMAN Keratin, type II cytoskeletal 8 OS=Homo sapiens GN=KRT8 PE=1 SV=7;>P05787 SWISS-PROT:P05787 Tax_Id=9606 Gene_Symbol=KRT8 Keratin, type II cytoskeletal 8;>sp|P05787-2|K2C8_HUMAN Isoform 2 of Keratin, type II cytoskeletal 8 OS=Homo sapi	0.826133	7.3834	4.53813e-05	113.07	53.004	1	S	VVKKIETRDGKLVSESSDVLPK_________	X;X;X;X;X;X;X;X;X;X;X;X;X;X;X;Phospho (STY);X;X;X;X;X;X;X;X;X;X;X;X;X;X;X	XXXXXXXXXXXPPPPPPPPPPPXXXXXXXXX	LVS(0.023)ES(0.826)S(0.151)DVLPK	LVS(-15.56)ES(7.38)S(-7.38)DVLPK	5	2	-0.062589
P05787;CON__P05787;P05787-2	478;478;506	P05787	P05787	Keratin, type II cytoskeletal 8	KRT8	>sp|P05787|K2C8_HUMAN Keratin, type II cytoskeletal 8 OS=Homo sapiens GN=KRT8 PE=1 SV=7;>P05787 SWISS-PROT:P05787 Tax_Id=9606 Gene_Symbol=KRT8 Keratin, type II cytoskeletal 8;>sp|P05787-2|K2C8_HUMAN Isoform 2 of Keratin, type II cytoskeletal 8 OS=Homo sapi	0.938967	11.9548	4.53813e-05	113.07	53.004	1	S	VKKIETRDGKLVSESSDVLPK__________	X;X;X;X;X;X;X;X;X;X;X;X;X;X;X;Phospho (STY);X;X;X;X;X;X;X;X;X;X;X;X;X;X;X	XXXXXXXXXXPPPPPPPPPPPXXXXXXXXXX	LVS(0.001)ES(0.06)S(0.939)DVLPK	LVS(-29.05)ES(-11.95)S(11.95)DVLPK	6	2	0.42825
P05787;CON__P05787;P05787-2;CON__H-INV:HIT000292931;CON__H-INV:HIT000016045	258;258;286;218;91	P05787	P05787	Keratin, type II cytoskeletal 8	KRT8	>sp|P05787|K2C8_HUMAN Keratin, type II cytoskeletal 8 OS=Homo sapiens GN=KRT8 PE=1 SV=7;>P05787 SWISS-PROT:P05787 Tax_Id=9606 Gene_Symbol=KRT8 Keratin, type II cytoskeletal 8;>sp|P05787-2|K2C8_HUMAN Isoform 2 of Keratin, type II cytoskeletal 8 OS=Homo sapi	1	86.9678	9.49312e-34	198.95	129.98	1	S	SVVLSMDNSRSLDMDSIIAEVKAQYEDIANR	X;X;X;X;X;X;X;X;X;X;X;X;X;Oxidation (M);X;Phospho (STY);X;X;X;X;X;X;X;X;X;X;X;X;X;X;X	XXXXXXXXXXPPPPPPPPPPPPXXXXXXXXX	SLDMDS(1)IIAEVK	S(-86.97)LDMDS(86.97)IIAEVK	6	2	1.3052		0.74991	0.47102	0.80199	1.052	1.2362	0.60837			0.76006		0.77501		0.87738	0.90341	0.61123		0.49834
P05787;CON__P05787;P05787-2	13;13;41	P05787	P05787	Keratin, type II cytoskeletal 8	KRT8	>sp|P05787|K2C8_HUMAN Keratin, type II cytoskeletal 8 OS=Homo sapiens GN=KRT8 PE=1 SV=7;>P05787 SWISS-PROT:P05787 Tax_Id=9606 Gene_Symbol=KRT8 Keratin, type II cytoskeletal 8;>sp|P05787-2|K2C8_HUMAN Isoform 2 of Keratin, type II cytoskeletal 8 OS=Homo sapi	0.999973	45.7643	2.16326e-05	214.67	159.41	1	S	___MSIRVTQKSYKVSTSGPRAFSSRSYTSG	X;X;X;X;X;X;X;X;X;X;X;X;X;X;X;Phospho (STY);X;X;X;X;X;X;X;Phospho (STY);Phospho (STY);X;Phospho (STY);Phospho (STY);Phospho (STY);Phospho (STY);X	XXXXXXXXXXXPPPPPPPPPPXXXXXXXXXX	SYKVS(1)TSGPR	S(-103.64)Y(-85.6)KVS(45.76)T(-45.76)S(-85.25)GPR	5	3	-0.1366	0.76707	0.58527							5.3624	4.4818	3.2499	2.2696	1.6705	1.7627				0.79933	1.1488	1.42	1.512	2.9067	2.7535	3.4382	5.1526	5.1322	2.5349	3.6753
P05787;CON__P05787;P05787-2	15;15;43	P05787	P05787	Keratin, type II cytoskeletal 8	KRT8	>sp|P05787|K2C8_HUMAN Keratin, type II cytoskeletal 8 OS=Homo sapiens GN=KRT8 PE=1 SV=7;>P05787 SWISS-PROT:P05787 Tax_Id=9606 Gene_Symbol=KRT8 Keratin, type II cytoskeletal 8;>sp|P05787-2|K2C8_HUMAN Isoform 2 of Keratin, type II cytoskeletal 8 OS=Homo sapi	0.986313	19.0855	0.000550478	122.55	76.141	1	S	_MSIRVTQKSYKVSTSGPRAFSSRSYTSGPG	X;X;X;X;X;X;X;X;X;X;X;X;X;X;X;Phospho (STY);X;X;X;X;X;Phospho (STY);Phospho (STY);X;Phospho (STY);Phospho (STY);Phospho (STY);Phospho (STY);X;X;X	XXXXXXXXXPPPPPPPPPPPPPPPXXXXXXX	VS(0.002)T(0.012)S(0.986)GPRAFSSR	VS(-28.14)T(-19.09)S(19.09)GPRAFS(-81.8)S(-99.69)R	4	3	0.31304										6.041
P05787;CON__P05787;P05787-2	425;425;453	P05787	P05787	Keratin, type II cytoskeletal 8	KRT8	>sp|P05787|K2C8_HUMAN Keratin, type II cytoskeletal 8 OS=Homo sapiens GN=KRT8 PE=1 SV=7;>P05787 SWISS-PROT:P05787 Tax_Id=9606 Gene_Symbol=KRT8 Keratin, type II cytoskeletal 8;>sp|P05787-2|K2C8_HUMAN Isoform 2 of Keratin, type II cytoskeletal 8 OS=Homo sapi	0.28048	1.43596	5.03836e-05	47.464	32.39		S	SIHTKTTSGYAGGLSSAYGGLTSPGLSYSLG	Phospho (STY);X;X;Phospho (STY);X;X;X;X;X;X;X;X;X;X;X;Phospho (STY);X;X;X;X;X;X;X;X;X;X;X;X;X;X;X	XXXXXPPPPPPPPPPPPPPPPPPPPPPPPPP	T(0.038)T(0.038)S(0.038)GY(0.004)AGGLS(0.095)S(0.28)AY(0.069)GGLT(0.202)S(0.185)PGLS(0.023)Y(0.021)S(0.005)LGSSFGSGAGSSSFSR	T(-8.64)T(-8.64)S(-8.64)GY(-18.97)AGGLS(-4.71)S(1.44)AY(-6.11)GGLT(-1.44)S(-1.8)PGLS(-10.91)Y(-11.22)S(-17.81)LGS(-28.2)S(-28.19)FGS(-27.84)GAGS(-35.17)S(-34.81)S(-34.81)FS(-34.81)R	11	3	1.06
P05787;CON__P05787;P05787-2	432;432;460	P05787	P05787	Keratin, type II cytoskeletal 8	KRT8	>sp|P05787|K2C8_HUMAN Keratin, type II cytoskeletal 8 OS=Homo sapiens GN=KRT8 PE=1 SV=7;>P05787 SWISS-PROT:P05787 Tax_Id=9606 Gene_Symbol=KRT8 Keratin, type II cytoskeletal 8;>sp|P05787-2|K2C8_HUMAN Isoform 2 of Keratin, type II cytoskeletal 8 OS=Homo sapi	0.418069	4.30998	1.3896e-05	58.058	30.387		S	SGYAGGLSSAYGGLTSPGLSYSLGSSFGSGA	X;X;X;X;X;X;X;X;X;X;X;X;X;X;X;Phospho (STY);X;X;X;X;X;X;X;X;X;X;X;X;X;X;X	PPPPPPPPPPPPPPPPPPPPPPPPPPPPPPP	T(0.002)T(0.001)S(0.001)GYAGGLS(0.009)S(0.066)AY(0.059)GGLT(0.155)S(0.418)PGLS(0.155)Y(0.059)S(0.066)LGS(0.001)S(0.006)FGS(0.001)GAGS(0.001)SSFSR	T(-22.62)T(-26.21)S(-26.21)GY(-31.07)AGGLS(-16.76)S(-8.05)AY(-8.5)GGLT(-4.31)S(4.31)PGLS(-4.31)Y(-8.5)S(-8.05)LGS(-25.88)S(-18.73)FGS(-25.38)GAGS(-28.88)S(-32.23)S(-31.79)FS(-31.79)R	18	3	0.57569
P05787;CON__P05787;P05787-2;CON__H-INV:HIT000292931	291;291;319;251	P05787	P05787	Keratin, type II cytoskeletal 8	KRT8	>sp|P05787|K2C8_HUMAN Keratin, type II cytoskeletal 8 OS=Homo sapiens GN=KRT8 PE=1 SV=7;>P05787 SWISS-PROT:P05787 Tax_Id=9606 Gene_Symbol=KRT8 Keratin, type II cytoskeletal 8;>sp|P05787-2|K2C8_HUMAN Isoform 2 of Keratin, type II cytoskeletal 8 OS=Homo sapi	1	67.567	0.000442871	84.734	11.374	1	S	AEAESMYQIKYEELQSLAGKHGDDLRRTKTE	X;X;X;X;Phospho (STY);X;X;X;X;X;X;X;X;X;X;Phospho (STY);X;X;X;X;X;X;X;X;X;X;X;X;X;X;X	XXXXXXXXXXPPPPPPPPPPXXXXXXXXXXX	YEELQS(1)LAGK	Y(-67.57)EELQS(67.57)LAGK	6	2	0.76022
CON__P12763;P02765	135;135	CON__P12763	CON__P12763	Alpha-2-HS-glycoprotein;Alpha-2-HS-glycoprotein chain A;Alpha-2-HS-glycoprotein chain B	AHSG	>P12763 SWISS-PROT:P12763 (Bos taurus) Alpha-2-HS-glycoprotein precursor;>sp|P02765|FETUA_HUMAN Alpha-2-HS-glycoprotein OS=Homo sapiens GN=AHSG PE=1 SV=1	0.49996	0	0.00093774	141.48	88.985	1	S	KQDGQFSVLFTKCDSSPDSAEDVRKLCPDCP	X;X;X;X;X;X;X;X;X;X;X;X;X;X;X;Phospho (STY);X;X;X;X;X;X;X;X;X;X;X;X;X;X;X	XXXXXXXXXXXXPPPPPPPPPPPPPXXXXXX	CDSS(0.5)PDS(0.5)AEDVRK	CDS(-37.93)S(0)PDS(0)AEDVRK	4	3	-0.43551
CON__P12763;P02765	138;138	CON__P12763	CON__P12763	Alpha-2-HS-glycoprotein;Alpha-2-HS-glycoprotein chain A;Alpha-2-HS-glycoprotein chain B	AHSG	>P12763 SWISS-PROT:P12763 (Bos taurus) Alpha-2-HS-glycoprotein precursor;>sp|P02765|FETUA_HUMAN Alpha-2-HS-glycoprotein OS=Homo sapiens GN=AHSG PE=1 SV=1	1	95.4649	2.16027e-35	306.44	262	1	S	GQFSVLFTKCDSSPDSAEDVRKLCPDCPLLA	X;X;X;X;X;X;X;X;X;X;X;X;X;X;X;Phospho (STY);X;X;X;X;X;X;X;X;X;X;X;X;X;X;X	XXXXXXXXXPPPPPPPPPPPPPXXXXXXXXX	CDSSPDS(1)AEDVRK	CDS(-136.67)S(-95.46)PDS(95.46)AEDVRK	7	3	-0.3039	0.85732	0.75282	0.40053	0.72823	0.69508	0.84993	0.71309	0.82983	0.72373	0.82024	0.73542	0.63518	0.74264	0.73455	0.69283	0.71984	0.68674	0.58273	0.6124	0.53477	0.54689	0.72604	0.60703	0.71129	0.73337	0.54108	0.68717	0.51497
CON__P12763	316	CON__P12763	CON__P12763			>P12763 SWISS-PROT:P12763 (Bos taurus) Alpha-2-HS-glycoprotein precursor	0.952554	14.1264	5.2651e-12	140.48	120.82	1;2;3	S	PLPLHRAHYDLRHTFSGVASVESSSGEAFHV	X;X;X;X;X;X;X;X;X;X;X;X;X;Phospho (STY);X;Phospho (STY);X;X;X;Phospho (STY);X;X;Phospho (STY);Phospho (STY);Phospho (STY);X;X;X;X;X;X	XXXXXXXXXXXXPPPPPPPPPPPPPPPPPPP	HT(0.037)FS(0.953)GVAS(0.002)VES(0.009)SSGEAFHVGK	HT(-14.13)FS(14.13)GVAS(-27.65)VES(-20.3)S(-40.53)S(-49.36)GEAFHVGK	4	3	0.14425	1.176		0.42847		0.86625	0.68567			0.98431	0.47805							0.67108			0.77586				0.93854
CON__P12763	320	CON__P12763	CON__P12763			>P12763 SWISS-PROT:P12763 (Bos taurus) Alpha-2-HS-glycoprotein precursor	1	75.8742	5.75686e-45	201.72	173.1	1;2;3	S	HRAHYDLRHTFSGVASVESSSGEAFHVGKTP	X;X;X;X;X;X;X;X;X;X;X;Phospho (STY);X;X;X;Phospho (STY);X;X;Phospho (STY);Phospho (STY);Phospho (STY);X;X;X;X;X;X;X;X;X;X	XXXXXXXXPPPPPPPPPPPPPPPPPPPPPXX	HTFSGVAS(1)VES(0.958)S(0.085)S(0.958)GEAFHVGK	HT(-84.99)FS(-75.87)GVAS(75.87)VES(13.33)S(-13.33)S(13.33)GEAFHVGK	8	4	-0.19325	0.97663	1.4261	0.93214	1.3443	1.552	1.07	1.0563	1.0345	1.0052	0.94967	0.93083	0.97343	0.6268	0.86275	1.4295	1.1219	1.1209	1.0596	1.1375	0.97407	1.2163	0.90551	0.96274	0.84967	1.4069	1.0506	1.2963	1.5757
CON__P12763	323	CON__P12763	CON__P12763			>P12763 SWISS-PROT:P12763 (Bos taurus) Alpha-2-HS-glycoprotein precursor	0.995207	27.1723	2.856e-108	234.8	210.93	1;2;3	S	HYDLRHTFSGVASVESSSGEAFHVGKTPIVG	X;X;X;X;X;X;Phospho (STY);X;Phospho (STY);X;X;X;Phospho (STY);X;X;Phospho (STY);Phospho (STY);Phospho (STY);X;X;X;X;X;X;X;X;X;X;X;X;X	XXXXXPPPPPPPPPPPPPPPPPPPPPXXXXX	HTFSGVAS(0.001)VES(0.995)S(0.002)S(0.002)GEAFHVGK	HT(-48.12)FS(-42.56)GVAS(-30.41)VES(27.17)S(-27.17)S(-27.17)GEAFHVGK	11	3	-0.21306	0.90781	1.2822	1.1137	1.228	1.1486	1.0865	0.94372	0.95427	0.89238	0.80012	0.80809	0.69719	0.72857	0.7019	1.373	1.1496	0.9971	1.113	0.73815	0.82407	0.85981	1.0069	0.90104	0.93966	1.0655	0.81564	1.0628	0.75488
CON__P12763	324	CON__P12763	CON__P12763			>P12763 SWISS-PROT:P12763 (Bos taurus) Alpha-2-HS-glycoprotein precursor	0.989309	19.6578	1.2158e-57	212.03	173.14	1;2;3	S	YDLRHTFSGVASVESSSGEAFHVGKTPIVGQ	X;X;X;X;X;Phospho (STY);X;Phospho (STY);X;X;X;Phospho (STY);X;X;Phospho (STY);Phospho (STY);Phospho (STY);X;X;X;X;X;X;X;X;X;X;X;X;X;X	XXXXPPPPPPPPPPPPPPPPPPPPPXXXXXX	HTFSGVASVES(0.012)S(0.989)S(0.999)GEAFHVGK	HT(-126.62)FS(-116.51)GVAS(-69.44)VES(-19.66)S(19.66)S(29.05)GEAFHVGK	12	4	-0.078871	0.94896	1.5442	0.65174	1.6176	1.3501	1.2943	0.924	1.0301	1.4461	0.94707	0.80875	0.7209	1.046	0.72243	1.12	1.1768	0.9275	0.70656	1.2763	1.0459	0.9534	0.75971	1.2881	1.0342	1.239	1.0928	0.55075	1.1269
CON__P12763	325	CON__P12763	CON__P12763			>P12763 SWISS-PROT:P12763 (Bos taurus) Alpha-2-HS-glycoprotein precursor	0.99877	29.0485	6.05399e-73	210.33	165.75	1;2;3	S	DLRHTFSGVASVESSSGEAFHVGKTPIVGQP	X;X;X;X;Phospho (STY);X;Phospho (STY);X;X;X;Phospho (STY);X;X;Phospho (STY);Phospho (STY);Phospho (STY);X;X;X;X;X;X;X;X;X;X;X;X;X;X;X	XXXPPPPPPPPPPPPPPPPPPPPPXXXXXXX	HTFSGVASVES(0.012)S(0.989)S(0.999)GEAFHVGK	HT(-126.62)FS(-116.51)GVAS(-69.44)VES(-19.66)S(19.66)S(29.05)GEAFHVGK	13	4	-0.078871	0.83101	1.5859	0.95087	1.4208	1.3121	1.0913	1.1656	1.0351	0.94969	1.0436	1.1771	0.81122	0.98229	0.89673	1.3525	1.1012	1.0036	1.2542	1.345	0.9316	1.1162	0.57281	1.035	1.2152	1.3773	1.1741	1.2672	1.0538
CON__P28800	481	CON__P28800	CON__P28800			>P28800 SWISS-PROT:P28800 (Bos taurus) Alpha-2-antiplasmin precursor	0.999999	62.2777	1.24668e-12	149.67	104.39	1	S	RGDKPFDPDLKLGPPSEEDYAQPSSPK____	X;X;X;X;X;X;X;X;X;X;X;X;X;X;X;Phospho (STY);X;X;X;X;X;X;X;X;X;X;X;X;X;X;X	XXXXXXXXXXXPPPPPPPPPPPPPPPPXXXX	LGPPS(1)EEDYAQPSSPK	LGPPS(62.28)EEDY(-62.28)AQPS(-106.2)S(-110.12)PK	5	2	-0.28755	0.73845	0.5914	0.35959	0.6657	0.51841	0.88864	0.69731	0.81325	0.60929	0.70364	0.55373	0.32603	0.67276	0.43541							0.43042		0.33691	0.4649				0.41849
Q04695;CON__Q04695	32;32	Q04695	Q04695	Keratin, type I cytoskeletal 17	KRT17	>sp|Q04695|K1C17_HUMAN Keratin, type I cytoskeletal 17 OS=Homo sapiens GN=KRT17 PE=1 SV=2;>Q04695 SWISS-PROT:Q04695 Tax_Id=9606 Gene_Symbol=KRT17 Keratin, type I cytoskeletal 17	1	80.2034	0.000637871	312.67	289.64	1;2	S	SSGLGGGSSRTSCRLSGGLGAGSCRLGSAGG	X;X;X;X;X;X;X;X;X;X;Phospho (STY);Phospho (STY);X;X;X;Phospho (STY);X;X;X;X;X;X;X;X;X;X;X;X;X;X;X	XXXXXXXXXXPPPPPPPPPPPPPPPXXXXXX	T(0.5)S(0.5)CRLS(1)GGLGAGSCR	T(0)S(0)CRLS(80.2)GGLGAGS(-105.15)CR	6	3	-0.15031	0.99401	0.69999	0.4868	0.82445	0.75475	0.88533	0.80139	0.86325	0.9468	0.95008	0.85979	0.75095	0.89447	0.86082	0.97763	0.81729	0.87051	0.90633	0.88781	0.80769	0.72866	0.87832	0.99599	0.82122	1.0085	0.90764	0.96026	0.84063
Q04695;CON__Q04695;CON__Q9QWL7	10;10;10	Q04695	Q04695	Keratin, type I cytoskeletal 17	KRT17	>sp|Q04695|K1C17_HUMAN Keratin, type I cytoskeletal 17 OS=Homo sapiens GN=KRT17 PE=1 SV=2;>Q04695 SWISS-PROT:Q04695 Tax_Id=9606 Gene_Symbol=KRT17 Keratin, type I cytoskeletal 17;>Q9QWL7 SWISS-PROT:Q9QWL7 Tax_Id=10090 Gene_Symbol=Krt17 Keratin, type I cytos	0.47094	2.3662	0.00198384	80.69	46.8		S	______MTTSIRQFTSSSSIKGSSGLGGGSS	X;X;X;X;X;X;X;X;X;X;X;X;X;X;X;Phospho (STY);X;X;X;X;X;X;X;X;X;X;X;X;X;X;X	XXXXXXXXXXXXPPPPPPPPPXXXXXXXXXX	QFT(0.151)S(0.471)S(0.273)S(0.053)S(0.053)IK	QFT(-4.95)S(2.37)S(-2.37)S(-9.51)S(-9.51)IK	4	2	0.010253
Q04695;CON__Q04695	28;28	Q04695	Q04695	Keratin, type I cytoskeletal 17	KRT17	>sp|Q04695|K1C17_HUMAN Keratin, type I cytoskeletal 17 OS=Homo sapiens GN=KRT17 PE=1 SV=2;>Q04695 SWISS-PROT:Q04695 Tax_Id=9606 Gene_Symbol=KRT17 Keratin, type I cytoskeletal 17	0.944674	12.3235	0.00232188	227.36	175.64	2	S	SIKGSSGLGGGSSRTSCRLSGGLGAGSCRLG	Phospho (STY);X;X;X;X;X;X;X;X;X;X;X;X;X;X;Phospho (STY);X;X;X;Phospho (STY);X;X;X;X;X;X;X;X;X;X;X	XXXXXXXXXXXXXXPPPPPPPPPPPPPPPXX	T(0.055)S(0.945)CRLS(1)GGLGAGSCR	T(-12.32)S(12.32)CRLS(98.54)GGLGAGS(-160.25)CR	2	3	-0.25823																						2.1029	3.4161	4.9361	4.5749			0.944
CON__Q32PI4	51	CON__Q32PI4	CON__Q32PI4			>Q32PI4 TREMBL:Q32PI4 (Bos taurus) Similar to complement factor I	0.999449	35.256	0.000241607	180.08	130.74	1	S	AHHAPEASLSKETEASSEVKPTSTQDTSQKD	X;X;X;X;X;X;X;X;X;X;X;X;X;X;X;Phospho (STY);X;X;X;X;X;X;X;X;X;X;X;X;X;X;X	XXXXXXXXXXXPPPPPPPPPPPPPPPPPPPX	ETEAS(0.999)SEVKPTSTQDTSQK	ET(-35.26)EAS(35.26)S(-35.97)EVKPT(-72.69)S(-92.43)T(-108.72)QDT(-130.73)S(-141.3)QK	5	3	-1.1832	0.8638			0.86465		0.8079	0.72401	0.79958		0.81067	0.53724
CON__Q32PI4	52	CON__Q32PI4	CON__Q32PI4			>Q32PI4 TREMBL:Q32PI4 (Bos taurus) Similar to complement factor I	0.499617	0	0.00123657	89.189	58.622		S	HHAPEASLSKETEASSEVKPTSTQDTSQKDF	X;X;X;X;X;X;X;X;X;X;X;X;X;X;X;X;X;X;X;X;X;X;X;X;X;X;X;X;X;X;X	XXXXXXXXXXXXXXXXXXXXXXXXXXXXXXX	ET(0.001)EAS(0.5)S(0.5)EVKPTSTQDTSQK	ET(-29.96)EAS(0)S(0)EVKPT(-33.29)S(-46.16)T(-46.16)QDT(-52.74)S(-60.38)QK	6	3	-1.1587
P08729;CON__Q3KNV1;CON__P08729	71;71;71	P08729	P08729	Keratin, type II cytoskeletal 7	KRT7	>sp|P08729|K2C7_HUMAN Keratin, type II cytoskeletal 7 OS=Homo sapiens GN=KRT7 PE=1 SV=5;>Q3KNV1 TREMBL:Q3KNV1;Q96GE1 Tax_Id=9606 Gene_Symbol=KRT7 keratin 7;>P08729 SWISS-PROT:P08729 Tax_Id=9606 Gene_Symbol=KRT7 Keratin, type II cytoskeletal 7	0.999952	43.2858	6.05521e-06	95.205	78.281	1	S	GGPVGAGIREVTINQSLLAPLRLDADPSLQR	X;X;X;X;X;X;X;X;X;X;X;X;X;X;X;Phospho (STY);X;X;X;X;X;X;X;X;X;X;X;X;X;X;X	XXXXXXXXXPPPPPPPPPPPPPPPPPPPPPP	EVTINQS(1)LLAPLRLDADPSLQR	EVT(-43.29)INQS(43.29)LLAPLRLDADPS(-58.77)LQR	7	3	-0.06542						0.61491						0.21418
P08729;CON__Q3KNV1;CON__P08729	28;28;28	P08729	P08729	Keratin, type II cytoskeletal 7	KRT7	>sp|P08729|K2C7_HUMAN Keratin, type II cytoskeletal 7 OS=Homo sapiens GN=KRT7 PE=1 SV=5;>Q3KNV1 TREMBL:Q3KNV1;Q96GE1 Tax_Id=9606 Gene_Symbol=KRT7 keratin 7;>P08729 SWISS-PROT:P08729 Tax_Id=9606 Gene_Symbol=KRT7 Keratin, type II cytoskeletal 7	0.236312	0	6.51801e-06	84.975	68.05		S	RSAAFSGRGAQVRLSSARPGGLGSSSLYGLG	X;X;X;X;X;X;X;X;X;X;X;X;X;X;X;Phospho (STY);X;X;X;X;X;X;X;X;X;X;X;X;X;X;X	XXXXXXXXXXXXXPPPPPPPPPPPPPPPPPP	LS(0.053)S(0.236)ARPGGLGS(0.236)S(0.236)S(0.236)LY(0.002)GLGASRPR	LS(-6.52)S(0)ARPGGLGS(0)S(0)S(0)LY(-20.55)GLGAS(-67.83)RPR	3	3	-0.061975
P08729;CON__Q3KNV1;CON__P08729	36;36;36	P08729	P08729	Keratin, type II cytoskeletal 7	KRT7	>sp|P08729|K2C7_HUMAN Keratin, type II cytoskeletal 7 OS=Homo sapiens GN=KRT7 PE=1 SV=5;>Q3KNV1 TREMBL:Q3KNV1;Q96GE1 Tax_Id=9606 Gene_Symbol=KRT7 keratin 7;>P08729 SWISS-PROT:P08729 Tax_Id=9606 Gene_Symbol=KRT7 Keratin, type II cytoskeletal 7	0.759574	9.37735	4.27001e-06	91.655	68.429	1	S	GAQVRLSSARPGGLGSSSLYGLGASRPRVAV	X;X;X;X;X;X;X;X;X;X;X;X;X;X;X;Phospho (STY);X;X;X;X;X;X;X;X;X;X;X;X;X;X;X	XXXXXPPPPPPPPPPPPPPPPPPPPPPPXXX	LS(0.088)S(0.088)ARPGGLGS(0.76)S(0.026)S(0.032)LY(0.007)GLGASRPR	LS(-9.38)S(-9.38)ARPGGLGS(9.38)S(-14.59)S(-13.8)LY(-20.4)GLGAS(-40.33)RPR	11	3	-0.32616															1.0698		0.58215					0.49011
P08729;CON__Q3KNV1;CON__P08729	37;37;37	P08729	P08729	Keratin, type II cytoskeletal 7	KRT7	>sp|P08729|K2C7_HUMAN Keratin, type II cytoskeletal 7 OS=Homo sapiens GN=KRT7 PE=1 SV=5;>Q3KNV1 TREMBL:Q3KNV1;Q96GE1 Tax_Id=9606 Gene_Symbol=KRT7 keratin 7;>P08729 SWISS-PROT:P08729 Tax_Id=9606 Gene_Symbol=KRT7 Keratin, type II cytoskeletal 7	0.475395	0	6.51801e-06	110.25	81.293		S	AQVRLSSARPGGLGSSSLYGLGASRPRVAVR	X;X;X;X;X;X;X;X;X;X;X;X;X;X;X;Phospho (STY);X;X;X;X;X;X;X;X;X;X;X;X;X;X;X	XXXXPPPPPPPPPPPPPPPPPPPPPPPXXXX	LSSARPGGLGS(0.025)S(0.475)S(0.475)LY(0.025)GLGASRPR	LS(-75.49)S(-70.64)ARPGGLGS(-12.86)S(0)S(0)LY(-12.86)GLGAS(-51.07)RPR	12	4	-0.11505
P08729;CON__Q3KNV1;CON__P08729	38;38;38	P08729	P08729	Keratin, type II cytoskeletal 7	KRT7	>sp|P08729|K2C7_HUMAN Keratin, type II cytoskeletal 7 OS=Homo sapiens GN=KRT7 PE=1 SV=5;>Q3KNV1 TREMBL:Q3KNV1;Q96GE1 Tax_Id=9606 Gene_Symbol=KRT7 keratin 7;>P08729 SWISS-PROT:P08729 Tax_Id=9606 Gene_Symbol=KRT7 Keratin, type II cytoskeletal 7	0.997324	26.2992	1.59327e-10	190.25	166.35	1;2	S	QVRLSSARPGGLGSSSLYGLGASRPRVAVRS	X;X;X;X;X;X;X;X;X;X;X;X;X;X;X;Phospho (STY);X;X;X;X;X;X;Phospho (STY);X;X;X;X;X;X;X;X	XXXPPPPPPPPPPPPPPPPPPPPPPPXXXXX	LSSARPGGLGSS(0.002)S(0.997)LYGLGASRPR	LS(-171.43)S(-164.12)ARPGGLGS(-58.96)S(-26.3)S(26.3)LY(-34.73)GLGAS(-69.36)RPR	13	4	0.042252	1.2041	0.95286	0.57979		0.71909	0.71888	0.54907	0.6038		0.19887	0.30155	0.17122	0.20623		1.0835		0.75076		0.7496	0.60467	0.48979				0.60578
P08729;CON__Q3KNV1;CON__P08729	45;45;45	P08729	P08729	Keratin, type II cytoskeletal 7	KRT7	>sp|P08729|K2C7_HUMAN Keratin, type II cytoskeletal 7 OS=Homo sapiens GN=KRT7 PE=1 SV=5;>Q3KNV1 TREMBL:Q3KNV1;Q96GE1 Tax_Id=9606 Gene_Symbol=KRT7 keratin 7;>P08729 SWISS-PROT:P08729 Tax_Id=9606 Gene_Symbol=KRT7 Keratin, type II cytoskeletal 7	0.999957	45.9243	0.00101166	129.75	99.27	1;2	S	RPGGLGSSSLYGLGASRPRVAVRSAYGGPVG	X;X;X;X;X;X;X;X;Phospho (STY);X;X;X;X;X;X;Phospho (STY);X;X;X;X;X;X;X;X;X;X;X;X;X;X;X	PPPPPPPPPPPPPPPPPPPXXXXXXXXXXXX	LSSARPGGLGSSSLYGLGAS(1)RPR	LS(-111.29)S(-108.9)ARPGGLGS(-69.23)S(-54.09)S(-48.77)LY(-45.92)GLGAS(45.92)RPR	20	4	-0.082073	1.2504
P08729;CON__Q3KNV1;CON__P08729	2;2;2	P08729	P08729	Keratin, type II cytoskeletal 7	KRT7	>sp|P08729|K2C7_HUMAN Keratin, type II cytoskeletal 7 OS=Homo sapiens GN=KRT7 PE=1 SV=5;>Q3KNV1 TREMBL:Q3KNV1;Q96GE1 Tax_Id=9606 Gene_Symbol=KRT7 keratin 7;>P08729 SWISS-PROT:P08729 Tax_Id=9606 Gene_Symbol=KRT7 Keratin, type II cytoskeletal 7	1	86.4553	8.4346e-07	163.38	126.45	1;2	S	______________MSIHFSSPVFTSRSAAF	X;X;X;X;X;X;X;X;X;X;X;X;X;X;X;Phospho (STY);X;X;X;Phospho (STY);Phospho (STY);X;X;X;X;X;X;X;X;X;X	XXXXXXXXXXXXXXXPPPPPPPPPPPPXXXX	S(1)IHFS(0.057)S(0.943)PVFTSR	S(86.46)IHFS(-12.17)S(12.17)PVFT(-98.67)S(-108.32)R	1	3	0.024693
P08729;CON__Q3KNV1;CON__P08729	6;6;6	P08729	P08729	Keratin, type II cytoskeletal 7	KRT7	>sp|P08729|K2C7_HUMAN Keratin, type II cytoskeletal 7 OS=Homo sapiens GN=KRT7 PE=1 SV=5;>Q3KNV1 TREMBL:Q3KNV1;Q96GE1 Tax_Id=9606 Gene_Symbol=KRT7 keratin 7;>P08729 SWISS-PROT:P08729 Tax_Id=9606 Gene_Symbol=KRT7 Keratin, type II cytoskeletal 7	0.999939	42.6496	9.95303e-15	154.13	103.78	1;2	S	__________MSIHFSSPVFTSRSAAFSGRG	X;X;X;X;X;X;X;X;X;X;X;Phospho (STY);X;X;X;Phospho (STY);Phospho (STY);X;X;X;X;X;X;X;X;X;X;X;X;X;X	XXXXXXXXXXXPPPPPPPPPPPPXXXXXXXX	SIHFS(1)S(1)PVFTSR	S(-42.65)IHFS(42.65)S(38.35)PVFT(-38.35)S(-49.12)R	5	2	0.18451
P08729;CON__Q3KNV1;CON__P08729	7;7;7	P08729	P08729	Keratin, type II cytoskeletal 7	KRT7	>sp|P08729|K2C7_HUMAN Keratin, type II cytoskeletal 7 OS=Homo sapiens GN=KRT7 PE=1 SV=5;>Q3KNV1 TREMBL:Q3KNV1;Q96GE1 Tax_Id=9606 Gene_Symbol=KRT7 keratin 7;>P08729 SWISS-PROT:P08729 Tax_Id=9606 Gene_Symbol=KRT7 Keratin, type II cytoskeletal 7	0.999838	38.3512	1.25479e-38	189.33	129.18	1;2	S	_________MSIHFSSPVFTSRSAAFSGRGA	X;X;X;X;X;X;X;X;X;X;Phospho (STY);X;X;X;Phospho (STY);Phospho (STY);X;X;X;X;X;X;X;X;X;X;X;X;X;X;X	XXXXXXXXXXPPPPPPPPPPPPXXXXXXXXX	SIHFS(1)S(1)PVFTSR	S(-42.65)IHFS(42.65)S(38.35)PVFT(-38.35)S(-49.12)R	6	2	0.18451
CON__Q922U2;CON__Q5XQN5	347;354	CON__Q922U2	CON__Q922U2			>Q922U2 SWISS-PROT:Q922U2 Tax_Id=10090 Gene_Symbol=Krt5 Keratin, type II cytoskeletal 5;>Q5XQN5 SWISS-PROT:Q5XQN5 (Bos taurus) Keratin, type II cytoskeletal 5	1	94.5488	0.002429	116.73	78.425	1	S	IIAEVKAQYEDIANRSRTEAESWYQTKYEEL	X;X;X;X;X;X;X;X;X;X;X;X;X;X;X;Phospho (STY);X;X;X;X;X;X;X;X;X;X;X;X;X;X;X	XXXXXXPPPPPPPPPPPXXXXXXXXXXXXXX	AQYEDIANRS(1)R	AQY(-94.55)EDIANRS(94.55)R	10	3	0.067743
Q6KB66;Q6KB66-2;CON__Q6KB66-1;Q6KB66-3	396;396;396;431	Q6KB66	Q6KB66	Keratin, type II cytoskeletal 80	KRT80	>sp|Q6KB66|K2C80_HUMAN Keratin, type II cytoskeletal 80 OS=Homo sapiens GN=KRT80 PE=1 SV=2;>sp|Q6KB66-2|K2C80_HUMAN Isoform 2 of Keratin, type II cytoskeletal 80 OS=Homo sapiens GN=KRT80;>Q6KB66-1 SWISS-PROT:Q6KB66-1 Tax_Id=9606 Gene_Symbol=KRT80 Isoform 1	0.993448	21.919	7.7806e-07	108.28	86.63	1	S	ATYRKLVEGEEGRMDSPSATVVSAVQSRCKT	X;X;X;X;X;X;X;X;X;X;X;X;X;Oxidation (M);X;Phospho (STY);X;X;X;X;X;X;X;X;X;X;X;X;X;X;X	XXXXXPPPPPPPPPPPPPPPPPPPPPPPXXX	LVEGEEGRMDS(0.993)PS(0.006)ATVVSAVQSR	LVEGEEGRMDS(21.92)PS(-21.92)AT(-37.82)VVS(-57.52)AVQS(-78.03)R	11	3	0.71058		0.80591		0.96676	0.70677	0.9583	0.75317	0.79794		0.46391			0.16885		1.03		0.85164	0.86957		0.56844	0.97391			0.69201	0.90189
Q6KB66;Q6KB66-2;CON__Q6KB66-1;Q6KB66-3	398;398;398;433	Q6KB66	Q6KB66	Keratin, type II cytoskeletal 80	KRT80	>sp|Q6KB66|K2C80_HUMAN Keratin, type II cytoskeletal 80 OS=Homo sapiens GN=KRT80 PE=1 SV=2;>sp|Q6KB66-2|K2C80_HUMAN Isoform 2 of Keratin, type II cytoskeletal 80 OS=Homo sapiens GN=KRT80;>Q6KB66-1 SWISS-PROT:Q6KB66-1 Tax_Id=9606 Gene_Symbol=KRT80 Isoform 1	0.575145	1.55227	0.000454211	62.589	38.183	1	S	YRKLVEGEEGRMDSPSATVVSAVQSRCKTAA	X;X;X;X;X;X;X;X;X;X;X;X;X;X;X;Phospho (STY);X;X;X;X;X;X;X;X;X;X;X;X;X;X;X	XXXPPPPPPPPPPPPPPPPPPPPPPPXXXXX	LVEGEEGRMDS(0.402)PS(0.575)AT(0.022)VVSAVQSR	LVEGEEGRMDS(-1.55)PS(1.55)AT(-14.11)VVS(-34.28)AVQS(-42.11)R	13	3	-0.37451			0.45904
Q6KB66;Q6KB66-2;CON__Q6KB66-1	23;23;23	Q6KB66	Q6KB66	Keratin, type II cytoskeletal 80	KRT80	>sp|Q6KB66|K2C80_HUMAN Keratin, type II cytoskeletal 80 OS=Homo sapiens GN=KRT80 PE=1 SV=2;>sp|Q6KB66-2|K2C80_HUMAN Isoform 2 of Keratin, type II cytoskeletal 80 OS=Homo sapiens GN=KRT80;>Q6KB66-1 SWISS-PROT:Q6KB66-1 Tax_Id=9606 Gene_Symbol=KRT80 Isoform 1	0.996226	25.2466	1.9166e-10	91.618	76.764	1	S	VGFSSLSSCEVTPVGSPRPGTSGWDSCRAPG	X;X;X;X;X;X;X;X;X;X;X;X;X;X;X;Phospho (STY);X;X;X;X;X;X;X;X;X;X;X;X;X;X;X	PPPPPPPPPPPPPPPPPPPPPPPPPPPPXXX	SCVVGFSSLSSCEVTPVGS(0.996)PRPGT(0.003)S(0.001)GWDSCR	S(-80.81)CVVGFS(-52.5)S(-60.65)LS(-55.58)S(-55.58)CEVT(-37.32)PVGS(25.25)PRPGT(-25.25)S(-32.57)GWDS(-42.99)CR	19	3	-0.25339																			1.306
CON__Q9TRI1	57	CON__Q9TRI1	CON__Q9TRI1			>Q9TRI1 TREMBL:Q9TRI1 (Bos taurus) similar to inter-alpha-trypsin inhibitor heavy chain2	0.529523	1.03446	5.99367e-06	92.147	70.246	1	S	KFQFVPENRRYQRSISGESGERTEDVDQVTV	X;X;X;X;X;X;X;X;X;X;X;X;X;X;X;Phospho (STY);X;X;X;X;X;X;X;X;X;X;X;X;X;X;X	XXXXXXXXXXXXXPPPPPPPPPPPPPPPPPP	S(0.024)IS(0.53)GES(0.417)GERT(0.029)EDVDQVTVYSYK	S(-13.48)IS(1.03)GES(-1.03)GERT(-12.55)EDVDQVT(-70.67)VY(-79.96)S(-82.76)Y(-82.92)K	3	3	-0.66301								1.0212
CON__Q9TRI1	60	CON__Q9TRI1	CON__Q9TRI1			>Q9TRI1 TREMBL:Q9TRI1 (Bos taurus) similar to inter-alpha-trypsin inhibitor heavy chain2	0.984788	20.742	5.6422e-07	116.98	89.299	1	S	FVPENRRYQRSISGESGERTEDVDQVTVYSY	X;X;X;X;X;X;X;X;X;X;X;X;X;X;X;Phospho (STY);X;X;X;X;X;X;X;X;X;X;X;X;X;X;X	XXXXXXXXXXPPPPPPPPPPPPPPPPPPPPP	SIS(0.008)GES(0.985)GERT(0.007)EDVDQVTVYSYK	S(-34.79)IS(-20.74)GES(20.74)GERT(-21.75)EDVDQVT(-92.3)VY(-100.87)S(-103.92)Y(-104.18)K	6	3	-0.45391	1.0965	2.7399	1.1888								0.95659	0.34131
CON__REFSEQ:XP_092267	140	CON__REFSEQ:XP_092267	CON__REFSEQ:XP_092267			>REFSEQ:XP_092267 Tax_Id=9606 Gene_Symbol=LOC150739 similar to Keratin, type II cytoskeletal 8	1	104.479	0.000216575	269.14	205.98	1	S	LEGKDSRLESGMQNMSIHTKTTSSYAGGLSS	X;X;X;X;X;X;X;X;X;X;X;Oxidation (M);X;X;Oxidation (M);Phospho (STY);X;X;X;X;X;X;X;X;X;X;X;X;X;X;X	XXXXXXXPPPPPPPPPPPPPXXXXXXXXXXX	LESGMQNMS(1)IHTK	LES(-158.23)GMQNMS(104.48)IHT(-104.48)K	9	3	-0.26611	0.87319	0.33641		0.68436	0.54469	1.3486	0.7729	0.90205		0.74141	0.45272		0.25762		0.6399	0.85319	0.92697	0.88252	0.8841	0.91497	0.85215	0.88167	0.98105	0.70892	0.85257		0.37395
E9PAV3;Q13765;E9PAV3-2	2054;191;901	E9PAV3	E9PAV3	Nascent polypeptide-associated complex subunit alpha	NACA	>sp|E9PAV3|NACAM_HUMAN Nascent polypeptide-associated complex subunit alpha, muscle-specific form OS=Homo sapiens GN=NACA PE=1 SV=1;>sp|Q13765|NACA_HUMAN Nascent polypeptide-associated complex subunit alpha OS=Homo sapiens GN=NACA PE=1 SV=1;>sp|E9PAV3-2|NA	1	101.934	7.5245e-09	280.94	46.136	1	S	VEVKDIELVMSQANVSRAKAVRALKNNSNDI	X;X;X;X;X;X;X;X;X;X;X;X;X;X;X;Phospho (STY);X;X;X;X;X;X;X;X;X;X;X;X;X;X;X	XXXXPPPPPPPPPPPPPPPXXXXXXXXXXXX	DIELVMSQANVS(1)RAK	DIELVMS(-101.93)QANVS(101.93)RAK	12	3	-0.478
E9PAV3;Q13765;E9PAV3-2	2029;166;876	E9PAV3	E9PAV3	Nascent polypeptide-associated complex subunit alpha	NACA	>sp|E9PAV3|NACAM_HUMAN Nascent polypeptide-associated complex subunit alpha, muscle-specific form OS=Homo sapiens GN=NACA PE=1 SV=1;>sp|Q13765|NACA_HUMAN Nascent polypeptide-associated complex subunit alpha OS=Homo sapiens GN=NACA PE=1 SV=1;>sp|E9PAV3-2|NA	0.972984	16.6722	1.18255e-08	71.765	54.153	1;2	S	SNIQENTQTPTVQEESEEEEVDETGVEVKDI	X;X;X;X;X;X;X;X;Phospho (STY);X;Phospho (STY);X;X;X;X;Phospho (STY);X;X;X;X;X;X;X;Phospho (STY);X;X;X;X;X;X;X	PPPPPPPPPPPPPPPPPPPPPPPPPPPPPXX	VQGEAVSNIQENTQTPT(0.006)VQEES(0.973)EEEEVDET(0.021)GVEVK	VQGEAVS(-58.08)NIQENT(-48.43)QT(-34.75)PT(-22.29)VQEES(16.67)EEEEVDET(-16.67)GVEVK	22	3	0.1209	1.1012	1.6008		1.6885			1.2651					1.1138			1.2483	1.1949	1.1486	1.1464	1.0859		1.1381				1.1862	0.87947	1.2571
O00116	65	O00116	O00116	Alkyldihydroxyacetonephosphate synthase, peroxisomal	AGPS	>sp|O00116|ADAS_HUMAN Alkyldihydroxyacetonephosphate synthase, peroxisomal OS=Homo sapiens GN=AGPS PE=1 SV=1	0.991405	21.2567	0.00218667	62.442	33.694	1	S	REALSTNECKARRAASAATAAPTATPAAQES	X;X;X;X;X;X;X;X;X;X;X;X;X;X;X;Phospho (STY);X;X;X;X;X;X;X;X;X;X;X;X;X;X;X	XXXXXXXXXXXXXPPPPPPPPPPPPPPPPPP	AAS(0.991)AAT(0.007)AAPT(0.001)AT(0.001)PAAQESGTIPK	AAS(21.26)AAT(-21.26)AAPT(-32.34)AT(-32.34)PAAQES(-48.29)GT(-58.39)IPK	3	3	-0.0022095
O00124;O00124-2	53;53	O00124	O00124	UBX domain-containing protein 8	UBXN8	>sp|O00124|UBXN8_HUMAN UBX domain-containing protein 8 OS=Homo sapiens GN=UBXN8 PE=1 SV=2;>sp|O00124-2|UBXN8_HUMAN Isoform 2 of UBX domain-containing protein 8 OS=Homo sapiens GN=UBXN8	0.987355	21.3538	0.00169021	48.773	36.954	5	S	CGRILLLLALLTLIISVTTSWLNSFKSPQVY	X;X;X;X;X;X;X;X;X;X;X;X;X;X;X;Phospho (STY);X;Phospho (STY);Phospho (STY);Phospho (STY);X;X;X;Phospho (STY);X;X;X;X;X;X;X	XXXPPPPPPPPPPPPPPPPPPPPPPPPPPPP	ILLLLALLT(0.012)LIIS(0.987)VT(0.972)T(0.972)S(0.972)WLNS(0.949)FKS(0.068)PQVY(0.066)LK	ILLLLALLT(-21.35)LIIS(21.35)VT(20.34)T(20.34)S(20.34)WLNS(16.27)FKS(-16.27)PQVY(-16.64)LK	13	4	0.16662
O00124;O00124-2	57;57	O00124	O00124	UBX domain-containing protein 8	UBXN8	>sp|O00124|UBXN8_HUMAN UBX domain-containing protein 8 OS=Homo sapiens GN=UBXN8 PE=1 SV=2;>sp|O00124-2|UBXN8_HUMAN Isoform 2 of UBX domain-containing protein 8 OS=Homo sapiens GN=UBXN8	0.972387	20.339	0.00169021	48.773	36.954	5	S	LLLLALLTLIISVTTSWLNSFKSPQVYLKEE	X;X;X;X;X;X;X;X;X;X;X;Phospho (STY);X;Phospho (STY);Phospho (STY);Phospho (STY);X;X;X;Phospho (STY);X;X;X;X;X;X;X;X;X;X;X	PPPPPPPPPPPPPPPPPPPPPPPPPPPPPXX	ILLLLALLT(0.012)LIIS(0.987)VT(0.972)T(0.972)S(0.972)WLNS(0.949)FKS(0.068)PQVY(0.066)LK	ILLLLALLT(-21.35)LIIS(21.35)VT(20.34)T(20.34)S(20.34)WLNS(16.27)FKS(-16.27)PQVY(-16.64)LK	17	4	0.16662
O00124;O00124-2	61;61	O00124	O00124	UBX domain-containing protein 8	UBXN8	>sp|O00124|UBXN8_HUMAN UBX domain-containing protein 8 OS=Homo sapiens GN=UBXN8 PE=1 SV=2;>sp|O00124-2|UBXN8_HUMAN Isoform 2 of UBX domain-containing protein 8 OS=Homo sapiens GN=UBXN8	0.949098	16.2662	0.00169021	48.773	36.954	5	S	ALLTLIISVTTSWLNSFKSPQVYLKEEEEKN	X;X;X;X;X;X;X;Phospho (STY);X;Phospho (STY);Phospho (STY);Phospho (STY);X;X;X;Phospho (STY);X;X;X;X;X;X;X;X;X;X;X;X;X;X;X	PPPPPPPPPPPPPPPPPPPPPPPPPXXXXXX	ILLLLALLT(0.012)LIIS(0.987)VT(0.972)T(0.972)S(0.972)WLNS(0.949)FKS(0.068)PQVY(0.066)LK	ILLLLALLT(-21.35)LIIS(21.35)VT(20.34)T(20.34)S(20.34)WLNS(16.27)FKS(-16.27)PQVY(-16.64)LK	21	4	0.16662
O00139;O00139-1;O00139-5;O00139-4	137;110;117;137	O00139	O00139	Kinesin-like protein KIF2A	KIF2A	>sp|O00139|KIF2A_HUMAN Kinesin-like protein KIF2A OS=Homo sapiens GN=KIF2A PE=1 SV=3;>sp|O00139-1|KIF2A_HUMAN Isoform 1 of Kinesin-like protein KIF2A OS=Homo sapiens GN=KIF2A;>sp|O00139-5|KIF2A_HUMAN Isoform 5 of Kinesin-like protein KIF2A OS=Homo sapiens	0.630517	4.44387	6.4112e-09	83.465	64.355	1	S	QFPEQSSSAQQNGSVSDISPVQAAKKEFGPP	X;X;X;X;X;X;X;X;X;X;X;X;X;X;X;Phospho (STY);X;X;X;X;X;X;X;X;X;X;X;X;X;X;X	PPPPPPPPPPPPPPPPPPPPPPPPPXXXXXX	ARPSQFPEQS(0.044)S(0.03)S(0.011)AQQNGS(0.057)VS(0.631)DIS(0.227)PVQAAK	ARPS(-36.13)QFPEQS(-11.61)S(-13.17)S(-17.45)AQQNGS(-10.41)VS(4.44)DIS(-4.44)PVQAAK	20	3	-0.58155								0.96106
O00139;O00139-1;O00139-5;O00139-4	140;113;120;140	O00139	O00139	Kinesin-like protein KIF2A	KIF2A	>sp|O00139|KIF2A_HUMAN Kinesin-like protein KIF2A OS=Homo sapiens GN=KIF2A PE=1 SV=3;>sp|O00139-1|KIF2A_HUMAN Isoform 1 of Kinesin-like protein KIF2A OS=Homo sapiens GN=KIF2A;>sp|O00139-5|KIF2A_HUMAN Isoform 5 of Kinesin-like protein KIF2A OS=Homo sapiens	0.997866	27.0502	2.22029e-19	118.68	118.68	1	S	EQSSSAQQNGSVSDISPVQAAKKEFGPPSRR	X;X;X;X;X;X;X;X;X;X;X;X;X;X;X;Phospho (STY);X;X;X;X;X;X;X;X;X;X;X;X;X;X;X	PPPPPPPPPPPPPPPPPPPPPPPXXXXXXXX	ARPSQFPEQSSSAQQNGSVS(0.002)DIS(0.998)PVQAAK	ARPS(-96.6)QFPEQS(-89.19)S(-87.01)S(-83.99)AQQNGS(-37.78)VS(-27.05)DIS(27.05)PVQAAK	23	3	0.243																												0.98284
O00141;O00141-4;O00141-3;O00141-5;O00141-2	74;64;88;102;169	O00141	O00141	Serine/threonine-protein kinase Sgk1	SGK1	>sp|O00141|SGK1_HUMAN Serine/threonine-protein kinase Sgk1 OS=Homo sapiens GN=SGK1 PE=1 SV=2;>sp|O00141-4|SGK1_HUMAN Isoform 4 of Serine/threonine-protein kinase Sgk1 OS=Homo sapiens GN=SGK1;>sp|O00141-3|SGK1_HUMAN Isoform 3 of Serine/threonine-protein kin	0.975732	15.4113	7.36666e-05	50.534	31.534	2	S	KISQPQEPELMNANPSPPPSPSQQINLGPSS	X;X;X;X;X;X;X;X;X;X;X;X;X;X;X;Phospho (STY);X;X;X;Phospho (STY);X;X;X;X;X;X;X;X;X;X;X	XPPPPPPPPPPPPPPPPPPPPPPPPPPPPPP	ISQPQEPELMNANPS(0.976)PPPS(0.843)PS(0.18)QQINLGPS(0.001)S(0.001)NPHAK	IS(-37.63)QPQEPELMNANPS(15.41)PPPS(7.21)PS(-7.21)QQINLGPS(-34.56)S(-34.56)NPHAK	15	4	0.14807
O00141;O00141-4;O00141-3;O00141-5;O00141-2	78;68;92;106;173	O00141	O00141	Serine/threonine-protein kinase Sgk1	SGK1	>sp|O00141|SGK1_HUMAN Serine/threonine-protein kinase Sgk1 OS=Homo sapiens GN=SGK1 PE=1 SV=2;>sp|O00141-4|SGK1_HUMAN Isoform 4 of Serine/threonine-protein kinase Sgk1 OS=Homo sapiens GN=SGK1;>sp|O00141-3|SGK1_HUMAN Isoform 3 of Serine/threonine-protein kin	0.843215	7.20903	7.36666e-05	50.534	31.534	2	S	PQEPELMNANPSPPPSPSQQINLGPSSNPHA	X;X;X;X;X;X;X;X;X;X;X;Phospho (STY);X;X;X;Phospho (STY);X;X;X;X;X;X;X;X;X;X;X;X;X;X;X	PPPPPPPPPPPPPPPPPPPPPPPPPPPPPPP	ISQPQEPELMNANPS(0.976)PPPS(0.843)PS(0.18)QQINLGPS(0.001)S(0.001)NPHAK	IS(-37.63)QPQEPELMNANPS(15.41)PPPS(7.21)PS(-7.21)QQINLGPS(-34.56)S(-34.56)NPHAK	19	4	0.14807
O00141;O00141-4;O00141-3;O00141-5;O00141-2	80;70;94;108;175	O00141	O00141	Serine/threonine-protein kinase Sgk1	SGK1	>sp|O00141|SGK1_HUMAN Serine/threonine-protein kinase Sgk1 OS=Homo sapiens GN=SGK1 PE=1 SV=2;>sp|O00141-4|SGK1_HUMAN Isoform 4 of Serine/threonine-protein kinase Sgk1 OS=Homo sapiens GN=SGK1;>sp|O00141-3|SGK1_HUMAN Isoform 3 of Serine/threonine-protein kin	0.565033	0	0.00151447	46.872	31.323	2	S	EPELMNANPSPPPSPSQQINLGPSSNPHAKP	X;X;X;X;X;X;X;X;X;X;X;X;X;X;X;X;X;X;X;X;X;X;X;X;X;X;X;X;X;X;X	XXXXXXXXXXXXXXXXXXXXXXXXXXXXXXX	ISQPQEPELMNANPS(0.841)PPPS(0.568)PS(0.565)QQINLGPS(0.013)S(0.013)NPHAK	IS(-36.55)QPQEPELMNANPS(4.5)PPPS(0)PS(0)QQINLGPS(-19.11)S(-19.11)NPHAK	21	4	0.41022
O00148;O00148-2;O00148-3	25;25;25	O00148	O00148	ATP-dependent RNA helicase DDX39A	DDX39A	>sp|O00148|DX39A_HUMAN ATP-dependent RNA helicase DDX39A OS=Homo sapiens GN=DDX39A PE=1 SV=2;>sp|O00148-2|DX39A_HUMAN Isoform 2 of ATP-dependent RNA helicase DDX39A OS=Homo sapiens GN=DDX39A;>sp|O00148-3|DX39A_HUMAN Isoform 3 of ATP-dependent RNA helicase	0.817793	6.53013	2.31254e-05	69.439	54.11	1	S	LLDYDEEEEPQAPQESTPAPPKKDIKGSYVS	X;X;X;X;X;X;X;X;X;X;X;X;X;X;X;Phospho (STY);X;X;X;X;X;X;X;X;X;X;X;Phospho (STY);X;X;Phospho (STY)	PPPPPPPPPPPPPPPPPPPPPPPXXXXXXXX	AEQDVENDLLDYDEEEEPQAPQES(0.818)T(0.182)PAPPKK	AEQDVENDLLDY(-33.2)DEEEEPQAPQES(6.53)T(-6.53)PAPPKK	24	4	-0.27464
O00148;O00148-2;O00148-3;Q13838;Q13838-2	37;37;37;38;38	O00148;Q13838	Q13838	ATP-dependent RNA helicase DDX39A;Spliceosome RNA helicase DDX39B	DDX39A;DDX39B	>sp|O00148|DX39A_HUMAN ATP-dependent RNA helicase DDX39A OS=Homo sapiens GN=DDX39A PE=1 SV=2;>sp|O00148-2|DX39A_HUMAN Isoform 2 of ATP-dependent RNA helicase DDX39A OS=Homo sapiens GN=DDX39A;>sp|O00148-3|DX39A_HUMAN Isoform 3 of ATP-dependent RNA helicase	0.999973	45.6484	0.00034918	190.52	154.98	1	S	GGDGAEAPAKKDVKGSYVSIHSSGFRDFLLK;PQESTPAPPKKDIKGSYVSIHSSGFRDFLLK	X;X;X;Phospho (STY);Phospho (STY);X;X;X;X;X;X;X;X;X;X;Phospho (STY);X;X;X;X;X;X;X;X;X;X;X;X;X;X;X	XXXXXXXXXXXXXXPPPPPPPPPPPPXXXXX	GS(1)YVSIHSSGFR	GS(45.65)Y(-45.65)VS(-100.51)IHS(-109.8)S(-124.09)GFR	2	3	-0.090368
O00148;O00148-2;O00148-3;Q13838;Q13838-2	40;40;40;41;41	O00148;Q13838	Q13838	ATP-dependent RNA helicase DDX39A;Spliceosome RNA helicase DDX39B	DDX39A;DDX39B	>sp|O00148|DX39A_HUMAN ATP-dependent RNA helicase DDX39A OS=Homo sapiens GN=DDX39A PE=1 SV=2;>sp|O00148-2|DX39A_HUMAN Isoform 2 of ATP-dependent RNA helicase DDX39A OS=Homo sapiens GN=DDX39A;>sp|O00148-3|DX39A_HUMAN Isoform 3 of ATP-dependent RNA helicase	0.999952	43.2291	0.00059506	190.52	153.84	1	S	GAEAPAKKDVKGSYVSIHSSGFRDFLLKPEL;STPAPPKKDIKGSYVSIHSSGFRDFLLKPEL	Phospho (STY);Phospho (STY);X;X;X;X;X;X;X;X;X;X;X;X;X;Phospho (STY);X;X;X;X;X;X;X;X;X;X;X;X;X;X;X	XXXXXXXXXXXPPPPPPPPPPPPXXXXXXXX	GSYVS(1)IHSSGFR	GS(-85.12)Y(-74.82)VS(43.23)IHS(-43.23)S(-68.33)GFR	5	3	-0.38859
O00151	118	O00151	O00151	PDZ and LIM domain protein 1	PDLIM1	>sp|O00151|PDLI1_HUMAN PDZ and LIM domain protein 1 OS=Homo sapiens GN=PDLIM1 PE=1 SV=4	1	102.446	4.28497e-05	152.67	113.11	1	S	KMNLASEPQEVLHIGSAHNRSAMPFTASPAS	X;X;X;X;X;X;X;X;X;X;X;X;X;X;X;Phospho (STY);X;X;X;X;X;X;Oxidation (M);X;X;Phospho (STY);X;Phospho (STY);X;X;Phospho (STY)	XPPPPPPPPPPPPPPPPPPPXXXXXXXXXXX	MNLASEPQEVLHIGS(1)AHNR	MNLAS(-102.45)EPQEVLHIGS(102.45)AHNR	15	3	-0.42154
O00151	130	O00151	O00151	PDZ and LIM domain protein 1	PDLIM1	>sp|O00151|PDLI1_HUMAN PDZ and LIM domain protein 1 OS=Homo sapiens GN=PDLIM1 PE=1 SV=4	0.999768	36.4569	6.9609e-34	186.36	151.46	1	S	HIGSAHNRSAMPFTASPASSTTARVITNQYN	X;X;X;Phospho (STY);X;X;X;X;X;X;Oxidation (M);X;X;X;X;Phospho (STY);X;X;X;X;X;X;X;X;X;X;X;X;X;X;X	XXXXXXXXPPPPPPPPPPPPPPPPXXXXXXX	SAMPFTAS(1)PASSTTAR	S(-132)AMPFT(-36.46)AS(36.46)PAS(-52.74)S(-72.55)T(-77.92)T(-72.55)AR	8	2	-0.49319	0.94179	0.5734	0.32374	0.543	0.50608	0.6616	0.54788	0.50498	0.17683	0.14323					0.65109		0.57544	0.56585	0.55252	0.53528	0.46246	0.54581	0.51853	0.36869	0.37867	0.081769
O00151	133	O00151	O00151	PDZ and LIM domain protein 1	PDLIM1	>sp|O00151|PDLI1_HUMAN PDZ and LIM domain protein 1 OS=Homo sapiens GN=PDLIM1 PE=1 SV=4	0.989455	24.1359	0.0011158	139.58	102.64	1	S	SAHNRSAMPFTASPASSTTARVITNQYNNPA	Phospho (STY);X;X;X;X;X;X;Oxidation (M);X;X;X;X;X;X;X;Phospho (STY);X;X;X;X;X;X;X;X;X;X;X;X;X;X;X	XXXXXPPPPPPPPPPPPPPPPXXXXXXXXXX	SAMPFTAS(0.003)PAS(0.989)S(0.004)T(0.004)TAR	S(-72.49)AMPFT(-48.07)AS(-25.42)PAS(24.14)S(-24.14)T(-24.14)T(-42.92)AR	11	3	-0.27523				0.56415		0.69784	0.51296	0.58197	0.25939	0.16129					0.69357	0.7138			0.55388
O00151	90	O00151	O00151	PDZ and LIM domain protein 1	PDLIM1	>sp|O00151|PDLI1_HUMAN PDZ and LIM domain protein 1 OS=Homo sapiens GN=PDLIM1 PE=1 SV=4	0.999999	60.8349	9.8325e-06	128.35	128.35	1	S	DNLTLTVARSEHKVWSPLVTEEGKRHPYKMN	X;X;X;X;X;X;X;X;X;X;X;X;X;X;X;Phospho (STY);X;X;X;X;X;X;X;X;X;X;X;X;X;X;X	XXXXXXXXXXXXXPPPPPPPPPPPXXXXXXX	VWS(1)PLVTEEGK	VWS(60.83)PLVT(-60.83)EEGK	3	2	-0.5098								0.72854							0.63908	0.69223	0.54455	0.62519	0.61658	0.57016	0.55984	0.61129	0.68347	0.54028	0.65655			0.054945
O00159;O00159-3;O00159-2	408;389;373	O00159	O00159	Unconventional myosin-Ic	MYO1C	>sp|O00159|MYO1C_HUMAN Unconventional myosin-Ic OS=Homo sapiens GN=MYO1C PE=1 SV=4;>sp|O00159-3|MYO1C_HUMAN Isoform 3 of Unconventional myosin-Ic OS=Homo sapiens GN=MYO1C;>sp|O00159-2|MYO1C_HUMAN Isoform 2 of Unconventional myosin-Ic OS=Homo sapiens GN=MYO	0.99978	36.5761	5.02023e-09	152.04	128.09	1	S	LVGKINRSLASKDVESPSWRSTTVLGLLDIY	X;X;X;X;X;X;X;X;X;X;X;X;X;X;X;Phospho (STY);X;X;X;X;X;X;X;X;X;X;X;X;X;X;X	XXXXXXXXXXXXPPPPPPPPXXXXXXXXXXX	DVES(1)PSWR	DVES(36.58)PS(-36.58)WR	4	2	-0.0206	0.77325	0.53711	0.30483	0.59527	0.52097	0.64583	0.67086	0.56511	0.60168	0.63907	0.68181	0.58704		0.63691	0.60491		0.54927	0.45902	0.52123	0.50779	0.45717	0.50413	0.53243	0.45739	0.59217	0.44615	0.61026	0.38058
O00159;O00159-3;O00159-2	410;391;375	O00159	O00159	Unconventional myosin-Ic	MYO1C	>sp|O00159|MYO1C_HUMAN Unconventional myosin-Ic OS=Homo sapiens GN=MYO1C PE=1 SV=4;>sp|O00159-3|MYO1C_HUMAN Isoform 3 of Unconventional myosin-Ic OS=Homo sapiens GN=MYO1C;>sp|O00159-2|MYO1C_HUMAN Isoform 2 of Unconventional myosin-Ic OS=Homo sapiens GN=MYO	0.978821	16.6481	0.000302309	134.57	134.57	1	S	GKINRSLASKDVESPSWRSTTVLGLLDIYGF	X;X;X;X;X;X;X;X;X;X;X;X;X;X;X;Phospho (STY);X;X;X;X;X;X;X;X;X;X;X;X;X;X;X	XXXXXXXXXXPPPPPPPPXXXXXXXXXXXXX	DVES(0.021)PS(0.979)WR	DVES(-16.65)PS(16.65)WR	6	2	-0.0096266													0.60292			0.53223
O00161	110	O00161	O00161	Synaptosomal-associated protein 23	SNAP23	>sp|O00161|SNP23_HUMAN Synaptosomal-associated protein 23 OS=Homo sapiens GN=SNAP23 PE=1 SV=1	1	115.696	1.19494e-57	298.1	250.8	1	S	SGKAYKTTWGDGGENSPCNVVSKQPGPVTNG	X;X;X;X;X;X;X;X;X;X;X;X;X;X;X;Phospho (STY);X;X;X;X;X;X;X;X;X;X;X;X;X;X;X	XXXXXXPPPPPPPPPPPPPPPPPXXXXXXXX	TTWGDGGENS(1)PCNVVSK	T(-186.68)T(-177.45)WGDGGENS(115.7)PCNVVS(-115.7)K	10	3	-0.043102	0.95313	0.75468	0.34731	1.0402	0.46809	0.68219	1.4973	0.53481	0.50113	0.49686	0.59749	0.59988	0.3404	0.34297	0.68888	0.55287	0.44264	0.4275	0.52262	0.46056	0.58389	0.52798	0.47852	0.38847	0.37482	0.21052	0.27452	0.15541
O00178	44	O00178	O00178	GTP-binding protein 1	GTPBP1	>sp|O00178|GTPB1_HUMAN GTP-binding protein 1 OS=Homo sapiens GN=GTPBP1 PE=1 SV=3	1	82.9106	8.13075e-12	115.87	65.51	2	S	ARAAAAAARLHGGFDSDCSEDGEALNGEPEL	X;X;X;X;X;X;X;X;X;X;X;X;X;X;X;Phospho (STY);X;X;Phospho (STY);X;X;X;X;X;X;X;X;X;X;X;X	XXXXXXXXXPPPPPPPPPPPPPPPPPPPPPP	LHGGFDS(1)DCS(1)EDGEALNGEPELDLTSK	LHGGFDS(82.91)DCS(82.46)EDGEALNGEPELDLT(-82.46)S(-82.46)K	7	3	-0.17626		0.51466	0.40019	1.132	0.54789	0.90814	0.9784	0.68419	0.4773		0.52726	0.60731	0.69496	0.69363	0.89498		0.85834	0.61487	0.69892	0.66829	0.5723	0.62166	0.76835	0.58843	0.75939	0.62891	0.79299	0.55353
O00178	47	O00178	O00178	GTP-binding protein 1	GTPBP1	>sp|O00178|GTPB1_HUMAN GTP-binding protein 1 OS=Homo sapiens GN=GTPBP1 PE=1 SV=3	1	82.4569	8.13075e-12	115.87	65.51	2	S	AAAAARLHGGFDSDCSEDGEALNGEPELDLT	X;X;X;X;X;X;X;X;X;X;X;X;Phospho (STY);X;X;Phospho (STY);X;X;X;X;X;X;X;X;X;X;X;X;X;X;X	XXXXXXPPPPPPPPPPPPPPPPPPPPPPPPP	LHGGFDS(1)DCS(1)EDGEALNGEPELDLTSK	LHGGFDS(82.91)DCS(82.46)EDGEALNGEPELDLT(-82.46)S(-82.46)K	10	3	-0.17626		0.51466	0.40019	1.132	0.54789	0.90814	0.9784	0.68419	0.4773		0.52726	0.60731	0.69496	0.69363	0.89498		0.85834	0.61487	0.69892	0.66829	0.5723	0.62166	0.76835	0.58843	0.75939	0.62891	0.79299	0.55353
O00178	580	O00178	O00178	GTP-binding protein 1	GTPBP1	>sp|O00178|GTPB1_HUMAN GTP-binding protein 1 OS=Homo sapiens GN=GTPBP1 PE=1 SV=3	1	85.1345	5.69141e-75	294.05	260.93	1	S	KAVGTITKLLQTTNNSPMNSKPQQIKMQSTK	X;X;X;X;X;X;X;X;X;X;X;X;X;X;X;Phospho (STY);X;Oxidation (M);X;X;X;X;X;X;X;X;X;X;X;X;X	XXXXXXXXPPPPPPPPPPPPPPPPPPXXXXX	LLQTTNNS(1)PMNSKPQQIK	LLQT(-122.64)T(-94.84)NNS(85.13)PMNS(-85.13)KPQQIK	8	3	-0.88881	0.85893	0.79677	0.42411	0.68993	0.53585	0.79194	0.98055	0.71737	0.85244	0.77228	0.61651	0.66897	0.73163	0.81616	0.61667	0.613	0.55677	0.67727	0.65465	0.57626	0.5457	0.54074	0.63223	0.54833	0.7467	1.3549	0.66393	1.0227
O00178	584	O00178	O00178	GTP-binding protein 1	GTPBP1	>sp|O00178|GTPB1_HUMAN GTP-binding protein 1 OS=Homo sapiens GN=GTPBP1 PE=1 SV=3	0.819864	6.58155	0.000583661	131.12	83.961	1	S	TITKLLQTTNNSPMNSKPQQIKMQSTKKGPL	X;X;X;X;X;X;X;X;X;X;X;X;X;Oxidation (M);X;Phospho (STY);X;X;X;X;X;X;X;X;X;X;X;X;X;X;X	XXXXPPPPPPPPPPPPPPPPPPXXXXXXXXX	LLQTTNNS(0.18)PMNS(0.82)KPQQIK	LLQT(-70.2)T(-51.81)NNS(-6.58)PMNS(6.58)KPQQIK	12	3	-0.014986												0.49212					0.60688			0.65645							0.397
O00178	643	O00178	O00178	GTP-binding protein 1	GTPBP1	>sp|O00178|GTPB1_HUMAN GTP-binding protein 1 OS=Homo sapiens GN=GTPBP1 PE=1 SV=3	0.522705	4.08711	7.10424e-06	58.122	42.748	1	S	GQPAASSNLQPQPKPSSGGRRRGGQRHKVKS	X;X;X;X;X;X;X;X;X;X;X;X;X;X;X;Phospho (STY);X;X;X;X;X;X;X;X;X;X;X;X;X;X;X	PPPPPPPPPPPPPPPPPPPPXXXXXXXXXXX	RDEGGPSGGPAVGAPPPGDEAS(0.012)S(0.012)VGAGQPAAS(0.072)S(0.204)NLQPQPKPS(0.523)S(0.177)GGR	RDEGGPS(-41.79)GGPAVGAPPPGDEAS(-16.41)S(-16.41)VGAGQPAAS(-8.6)S(-4.09)NLQPQPKPS(4.09)S(-4.7)GGR	42	4	0.0098395
O00178	644	O00178	O00178	GTP-binding protein 1	GTPBP1	>sp|O00178|GTPB1_HUMAN GTP-binding protein 1 OS=Homo sapiens GN=GTPBP1 PE=1 SV=3	0.493581	0	7.10424e-06	58.122	42.748		S	QPAASSNLQPQPKPSSGGRRRGGQRHKVKSQ	X;X;X;X;X;X;X;X;X;X;X;X;X;X;X;X;X;X;X;X;X;X;X;X;X;X;X;X;X;X;X	XXXXXXXXXXXXXXXXXXXXXXXXXXXXXXX	RDEGGPSGGPAVGAPPPGDEASSVGAGQPAAS(0.006)S(0.006)NLQPQPKPS(0.494)S(0.494)GGR	RDEGGPS(-58.04)GGPAVGAPPPGDEAS(-32.16)S(-32.16)VGAGQPAAS(-19.07)S(-19.07)NLQPQPKPS(0)S(0)GGR	43	4	-0.075321
O00178	8	O00178	O00178	GTP-binding protein 1	GTPBP1	>sp|O00178|GTPB1_HUMAN GTP-binding protein 1 OS=Homo sapiens GN=GTPBP1 PE=1 SV=3	0.973014	15.6289	2.79479e-12	131.54	106.35	2	S	________MATERSRSAMDSPVPASMFAPEP	X;X;X;X;X;X;X;X;X;X;X;X;X;X;X;Phospho (STY);X;Oxidation (M);X;X;X;X;X;X;X;X;X;X;X;X;X	XXXXXXXXXXXXXXXPPPPPPPPPPPPPPPP	S(0.973)AMDS(0.027)PVPASMFAPEPS(0.545)S(0.455)PGAAR	S(15.63)AMDS(-15.63)PVPAS(-57.98)MFAPEPS(0.79)S(-0.79)PGAAR	1	2	-0.079158	0.95685															0.64636	0.60778	0.66816			0.613	0.68876		0.61671
O00178	12	O00178	O00178	GTP-binding protein 1	GTPBP1	>sp|O00178|GTPB1_HUMAN GTP-binding protein 1 OS=Homo sapiens GN=GTPBP1 PE=1 SV=3	0.993243	21.7595	4.41145e-23	154.45	124.05	2	S	____MATERSRSAMDSPVPASMFAPEPSSPG	X;X;X;X;X;X;X;X;X;X;X;X;X;Oxidation (M);X;Phospho (STY);X;X;X;X;X;Oxidation (M);X;X;X;X;X;Phospho (STY);Phospho (STY);X;X	XXXXXXXXXPPPPPPPPPPPPPPPPPPPPPP	S(0.007)AMDS(0.993)PVPASMFAPEPS(0.609)S(0.391)PGAAR	S(-21.76)AMDS(21.76)PVPAS(-63.18)MFAPEPS(1.92)S(-1.92)PGAAR	5	2	-0.40125	1.1428								0.33696						0.88543	0.79241		0.72224	0.63207	0.66613	0.6352	0.79274	0.77999	0.57133	0.45379
O00178	17	O00178	O00178	GTP-binding protein 1	GTPBP1	>sp|O00178|GTPB1_HUMAN GTP-binding protein 1 OS=Homo sapiens GN=GTPBP1 PE=1 SV=3	0.972899	17.7663	2.11327e-06	90.896	70.923	2	S	ATERSRSAMDSPVPASMFAPEPSSPGAARAA	X;X;X;X;X;X;X;X;X;X;X;X;X;X;X;Phospho (STY);Oxidation (M);X;X;X;X;X;Phospho (STY);Phospho (STY);X;X;X;X;X;X;X	XXXXXXPPPPPPPPPPPPPPPPPPPPPPPXX	S(0.011)AMDS(0.016)PVPAS(0.973)MFAPEPS(0.5)S(0.5)PGAAR	S(-19.54)AMDS(-17.77)PVPAS(17.77)MFAPEPS(0)S(0)PGAAR	10	3	0.049685
O00178	24	O00178	O00178	GTP-binding protein 1	GTPBP1	>sp|O00178|GTPB1_HUMAN GTP-binding protein 1 OS=Homo sapiens GN=GTPBP1 PE=1 SV=3	0.891204	9.37621	4.377e-18	150.11	116.07	1;2	S	AMDSPVPASMFAPEPSSPGAARAAAAAARLH	X;Oxidation (M);X;Phospho (STY);X;X;X;X;Phospho (STY);Oxidation (M);X;X;X;X;X;Phospho (STY);X;X;X;X;X;X;X;X;X;X;X;X;X;X;X	PPPPPPPPPPPPPPPPPPPPPPXXXXXXXXX	S(0.17)AMDS(0.83)PVPASMFAPEPS(0.891)S(0.109)PGAAR	S(-7.05)AMDS(7.05)PVPAS(-52.23)MFAPEPS(9.38)S(-9.38)PGAAR	17	2	-0.68237	1.0457	0.61887					0.87912	0.68692	1.7969	2.6185	3.2869				0.63118	0.78345		0.66816	0.65495	0.64422	0.613	0.76873	0.78791	1.3315	0.58015
O00178	25	O00178	O00178	GTP-binding protein 1	GTPBP1	>sp|O00178|GTPB1_HUMAN GTP-binding protein 1 OS=Homo sapiens GN=GTPBP1 PE=1 SV=3	0.985851	18.4539	2.22012e-43	179.43	129.19	1;2	S	MDSPVPASMFAPEPSSPGAARAAAAAARLHG	Oxidation (M);X;Phospho (STY);X;X;X;X;Phospho (STY);Oxidation (M);X;X;X;X;X;X;Phospho (STY);X;X;X;X;X;X;X;X;X;X;X;X;X;X;X	PPPPPPPPPPPPPPPPPPPPPXXXXXXXXXX	S(0.016)AMDS(0.984)PVPASMFAPEPS(0.014)S(0.986)PGAAR	S(-17.8)AMDS(17.8)PVPAS(-56.72)MFAPEPS(-18.45)S(18.45)PGAAR	18	2	0.6986	0.95685	0.61887					0.87912	0.68692	1.7969	2.6185	3.2869				0.63118	1.0115	0.60778	0.66816	0.63207	0.6855	0.71526	0.75037	0.73709	0.61671	0.58015
O00193	147	O00193	O00193	Small acidic protein	SMAP	>sp|O00193|SMAP_HUMAN Small acidic protein OS=Homo sapiens GN=SMAP PE=1 SV=1	1	54.0722	0.000230655	76.068	53.442	1	S	SPDDSESDSESEKEESAEELQAAEHPDEVED	X;X;X;X;X;X;X;X;X;X;X;X;X;X;X;Phospho (STY);X;X;X;X;X;X;X;X;X;X;X;X;X;X;X	XXXXXXXXXXXXXPPPPPPPPPPPPPPPPPP	EES(1)AEELQAAEHPDEVEDPK	EES(54.07)AEELQAAEHPDEVEDPK	3	3	-0.034411
O00193	15	O00193	O00193	Small acidic protein	SMAP	>sp|O00193|SMAP_HUMAN Small acidic protein OS=Homo sapiens GN=SMAP PE=1 SV=1	0.893951	9.27205	1.23968e-30	157.02	121.98	1	S	_MSAARESHPHGVKRSASPDDDLGSSNWEAA	X;X;X;X;X;X;X;X;X;X;X;X;X;X;X;Phospho (STY);X;X;X;X;X;X;X;X;X;X;X;X;X;X;X	XXXXXXXXXXXXXXPPPPPPPPPPPPPPPPP	RS(0.894)AS(0.106)PDDDLGSSNWEAADLGNEERK	RS(9.27)AS(-9.27)PDDDLGS(-41.57)S(-35.07)NWEAADLGNEERK	2	3	-0.050836									0.8543			1.052				0.9092		1.4664				0.83901	1.5288	0.88681			1.3599
O00193	17	O00193	O00193	Small acidic protein	SMAP	>sp|O00193|SMAP_HUMAN Small acidic protein OS=Homo sapiens GN=SMAP PE=1 SV=1	0.98447	20.9566	4.74624e-28	154.95	131.66	1	S	SAARESHPHGVKRSASPDDDLGSSNWEAADL	X;X;X;X;X;X;X;X;X;X;X;X;X;X;X;Phospho (STY);X;X;X;X;X;X;X;X;X;X;X;X;X;X;X	XXXXXXXXXXXXPPPPPPPPPPPPPPPPPPP	RS(0.008)AS(0.984)PDDDLGS(0.004)S(0.004)NWEAADLGNEERK	RS(-20.96)AS(20.96)PDDDLGS(-24.12)S(-24.12)NWEAADLGNEERK	4	3	0.013485	1.1876	1.2307	0.71327	1.3814	1.1407	0.86312	0.56052	1.0462	0.8768	0.86095	0.86315	0.70935	0.70873	0.81754	1.1041	0.89613	0.92472	1.0996	1.0219	0.75705	0.71219	0.82285		0.88681	0.99725	1.054	0.97061	0.95356
O00193	24	O00193	O00193	Small acidic protein	SMAP	>sp|O00193|SMAP_HUMAN Small acidic protein OS=Homo sapiens GN=SMAP PE=1 SV=1	0.895984	12.514	3.10153e-14	133.84	109.33	1	S	PHGVKRSASPDDDLGSSNWEAADLGNEERKQ	X;X;X;X;X;X;X;X;X;X;X;X;X;X;X;Phospho (STY);X;X;X;X;X;X;X;X;X;X;X;X;X;X;X	XXXXXPPPPPPPPPPPPPPPPPPPPPPPPPX	RS(0.05)AS(0.05)PDDDLGS(0.896)S(0.004)NWEAADLGNEER	RS(-12.51)AS(-12.51)PDDDLGS(12.51)S(-24)NWEAADLGNEER	11	3	-0.52616
O00193	25	O00193	O00193	Small acidic protein	SMAP	>sp|O00193|SMAP_HUMAN Small acidic protein OS=Homo sapiens GN=SMAP PE=1 SV=1	0.773099	5.8413	1.60125e-07	104.66	83.391	1	S	HGVKRSASPDDDLGSSNWEAADLGNEERKQK	X;X;X;X;X;X;X;X;X;X;X;X;X;X;X;Phospho (STY);X;X;X;X;X;X;X;X;X;X;X;X;X;X;X	XXXXPPPPPPPPPPPPPPPPPPPPPPPPPXX	RS(0.014)AS(0.012)PDDDLGS(0.201)S(0.773)NWEAADLGNEER	RS(-17.54)AS(-18.14)PDDDLGS(-5.84)S(5.84)NWEAADLGNEER	12	3	0.94083										0.90993														0.77676
O00203;O00203-3	276;227	O00203	O00203	AP-3 complex subunit beta-1	AP3B1	>sp|O00203|AP3B1_HUMAN AP-3 complex subunit beta-1 OS=Homo sapiens GN=AP3B1 PE=1 SV=3;>sp|O00203-3|AP3B1_HUMAN Isoform 2 of AP-3 complex subunit beta-1 OS=Homo sapiens GN=AP3B1	1	76.5682	4.60034e-07	136.6	110.59	1	S	KEGDELEDNGKNFYESDDDQKEKTDKKKKPY	X;X;X;X;X;X;X;X;X;X;X;X;X;X;X;Phospho (STY);X;X;X;X;X;X;X;X;X;X;X;X;X;X;X	XXXXXXXXXXXPPPPPPPPPPXXXXXXXXXX	NFYES(1)DDDQK	NFY(-76.57)ES(76.57)DDDQK	5	2	0.10103	0.81574	0.61223	0.38793	0.7173	0.64559	0.85419	0.67717	0.88433	0.81632	0.90973	0.8603	0.62869	0.93267	0.85051	0.74874	0.70808	0.64858	0.65741	0.67004	0.64375	0.59072	0.72533	0.69891	0.56422	0.77414	0.50549	0.72471	0.53598
O00221	177	O00221	O00221	NF-kappa-B inhibitor epsilon	NFKBIE	>sp|O00221|IKBE_HUMAN NF-kappa-B inhibitor epsilon OS=Homo sapiens GN=NFKBIE PE=1 SV=3	0.640413	3.47911	3.94699e-05	63.268	51.699	1	S	LRSLRSLPESTSAPASGPSDGSPQPCTHPPG	X;X;X;X;X;X;X;X;X;X;X;X;X;X;X;Phospho (STY);X;X;X;X;X;X;X;X;X;X;X;X;X;X;X	XXXXXPPPPPPPPPPPPPPPPPPPPPPPPPP	SLPES(0.002)T(0.002)S(0.002)APAS(0.64)GPS(0.059)DGS(0.287)PQPCT(0.007)HPPGPVK	S(-41.4)LPES(-25.28)T(-24.76)S(-25.28)APAS(3.48)GPS(-10.34)DGS(-3.48)PQPCT(-19.63)HPPGPVK	11	3	-0.45687
O00221	180	O00221	O00221	NF-kappa-B inhibitor epsilon	NFKBIE	>sp|O00221|IKBE_HUMAN NF-kappa-B inhibitor epsilon OS=Homo sapiens GN=NFKBIE PE=1 SV=3	0.503273	1.64033	4.16847e-05	62.781	48.442	1	S	LRSLPESTSAPASGPSDGSPQPCTHPPGPVK	X;X;X;X;X;X;X;X;X;X;X;X;X;X;X;Phospho (STY);X;X;X;X;X;X;X;X;X;X;X;X;X;X;X	XXPPPPPPPPPPPPPPPPPPPPPPPPPPPPP	SLPES(0.001)T(0.001)S(0.002)APAS(0.145)GPS(0.503)DGS(0.345)PQPCT(0.003)HPPGPVK	S(-47.84)LPES(-28.69)T(-28.38)S(-23.51)APAS(-5.39)GPS(1.64)DGS(-1.64)PQPCT(-22.79)HPPGPVK	14	3	-0.35569	0.97318
O00221	183	O00221	O00221	NF-kappa-B inhibitor epsilon	NFKBIE	>sp|O00221|IKBE_HUMAN NF-kappa-B inhibitor epsilon OS=Homo sapiens GN=NFKBIE PE=1 SV=3	0.997477	27.1907	6.58506e-17	116.45	103.63	1	S	LPESTSAPASGPSDGSPQPCTHPPGPVKEPQ	X;X;X;X;X;X;X;X;X;X;X;X;X;X;X;Phospho (STY);X;X;X;X;X;X;X;X;X;X;X;X;X;X;X	PPPPPPPPPPPPPPPPPPPPPPPPPPPPXXX	SLPESTSAPASGPS(0.001)DGS(0.997)PQPCT(0.002)HPPGPVK	S(-72.35)LPES(-58.68)T(-53.64)S(-53.19)APAS(-39.8)GPS(-32.97)DGS(27.19)PQPCT(-27.19)HPPGPVK	17	3	0.10447		0.69425		0.6493	0.72247	0.89712	0.61538	0.75162	0.79308	0.87834	0.7129	0.57541	0.71122	0.54619	0.83912	0.68428	0.72778	0.70013	0.77351	0.68893	0.60733	0.75859	0.72278	0.64033	0.95619	0.50014	0.73892	0.44567
O00257	182	O00257	O00257	E3 SUMO-protein ligase CBX4	CBX4	>sp|O00257|CBX4_HUMAN E3 SUMO-protein ligase CBX4 OS=Homo sapiens GN=CBX4 PE=1 SV=3	0.999829	37.6598	3.83226e-05	125.39	88.45	1	S	KMYDLQYQGGHKEAPSPTCPDLGAKSHPPDK	X;X;X;X;X;X;X;X;X;X;X;X;X;X;X;Phospho (STY);X;X;X;X;X;X;X;X;X;X;X;X;X;X;X	XXXXXXXXXXXXPPPPPPPPPPPPPXXXXXX	EAPS(1)PTCPDLGAK	EAPS(37.66)PT(-37.66)CPDLGAK	4	2	-0.8805	0.98665							0.48698							0.81041							0.63775	0.53268	0.32134	0.42128
O00264;O00264-2	181;129	O00264	O00264	Membrane-associated progesterone receptor component 1	PGRMC1	>sp|O00264|PGRC1_HUMAN Membrane-associated progesterone receptor component 1 OS=Homo sapiens GN=PGRMC1 PE=1 SV=3;>sp|O00264-2|PGRC1_HUMAN Isoform 2 of Membrane-associated progesterone receptor component 1 OS=Homo sapiens GN=PGRMC1	0.999992	50.7466	3.00445e-65	246.08	211.33	1	S	HVGKLLKEGEEPTVYSDEEEPKDESARKND_	X;X;X;X;X;X;X;X;X;X;X;X;X;X;X;Phospho (STY);X;X;X;X;X;X;X;X;X;X;X;X;X;X;X	XXXXXXXPPPPPPPPPPPPPPPPPPPPPXXX	EGEEPTVYS(1)DEEEPK	EGEEPT(-50.75)VY(-71.89)S(50.75)DEEEPK	9	2	-0.077682	1.0445	1.2279	0.89126	3.3963	1.3325	1.1542	2.2327	1.1477	1.5308	1.3437	1.1594	0.90504	0.66721	0.45731	0.75884	0.68883	0.55897	0.55162	0.80507	0.73266	1.0524	0.84159	0.62115	0.84018	0.65296	0.5406	0.64604	0.37723
O00264;O00264-2	54;54	O00264	O00264	Membrane-associated progesterone receptor component 1	PGRMC1	>sp|O00264|PGRC1_HUMAN Membrane-associated progesterone receptor component 1 OS=Homo sapiens GN=PGRMC1 PE=1 SV=3;>sp|O00264-2|PGRC1_HUMAN Isoform 2 of Membrane-associated progesterone receptor component 1 OS=Homo sapiens GN=PGRMC1	0.815985	6.46829	9.72267e-35	169.62	135.92	1	S	IFLLYKIVRGDQPAASGDSDDDEPPPLPRLK	X;X;X;X;X;X;X;X;X;X;X;X;X;X;X;Phospho (STY);X;X;X;X;X;X;X;X;X;X;X;X;X;X;X	XXXXXXPPPPPPPPPPPPPPPPPPPPPPPPP	IVRGDQPAAS(0.816)GDS(0.184)DDDEPPPLPR	IVRGDQPAAS(6.47)GDS(-6.47)DDDEPPPLPR	10	3	-0.11677																								0.48177
O00264;O00264-2	57;57	O00264	O00264	Membrane-associated progesterone receptor component 1	PGRMC1	>sp|O00264|PGRC1_HUMAN Membrane-associated progesterone receptor component 1 OS=Homo sapiens GN=PGRMC1 PE=1 SV=3;>sp|O00264-2|PGRC1_HUMAN Isoform 2 of Membrane-associated progesterone receptor component 1 OS=Homo sapiens GN=PGRMC1	0.999995	53.2	4.60424e-74	209.43	180.69	1	S	LYKIVRGDQPAASGDSDDDEPPPLPRLKRRD	X;X;X;X;X;X;X;X;X;X;X;X;X;X;X;Phospho (STY);X;X;X;X;X;X;X;X;X;X;X;X;X;X;X	XXXPPPPPPPPPPPPPPPPPPPPPPPPPXXX	IVRGDQPAASGDS(1)DDDEPPPLPR	IVRGDQPAAS(-53.2)GDS(53.2)DDDEPPPLPR	13	3	-0.34046	0.99284	0.7677	0.46045	2.1367	0.80386	1.0052	1.9395	0.76763	0.895	0.79586	0.80182	0.64909	0.76028	0.70693	0.94838	0.56026	0.59383	0.64952	0.62371	0.68441	0.79299	0.73495	0.54154	0.92858	0.76232	0.75392	0.77416	0.26749
O00267;O00267-2	666;662	O00267	O00267	Transcription elongation factor SPT5	SUPT5H	>sp|O00267|SPT5H_HUMAN Transcription elongation factor SPT5 OS=Homo sapiens GN=SUPT5H PE=1 SV=1;>sp|O00267-2|SPT5H_HUMAN Isoform 2 of Transcription elongation factor SPT5 OS=Homo sapiens GN=SUPT5H	1	86.5346	1.88986e-14	225.55	172.95	1	S	PRDVTNFTVGGFAPMSPRISSPMHPSAGGQR	X;X;X;X;X;X;X;X;X;X;X;X;X;X;Oxidation (M);Phospho (STY);X;X;X;Phospho (STY);Phospho (STY);X;X;X;X;Phospho (STY);X;X;X;X;X	XXPPPPPPPPPPPPPPPPXXXXXXXXXXXXX	DVTNFTVGGFAPMS(1)PR	DVT(-108.57)NFT(-86.53)VGGFAPMS(86.53)PR	14	3	-0.30336	0.92097														0.74256	0.58676
O00267;O00267-2	671;667	O00267	O00267	Transcription elongation factor SPT5	SUPT5H	>sp|O00267|SPT5H_HUMAN Transcription elongation factor SPT5 OS=Homo sapiens GN=SUPT5H PE=1 SV=1;>sp|O00267-2|SPT5H_HUMAN Isoform 2 of Transcription elongation factor SPT5 OS=Homo sapiens GN=SUPT5H	0.999983	47.8772	0.000468424	197.21	158.4	1	S	NFTVGGFAPMSPRISSPMHPSAGGQRGGFGS	X;X;X;X;X;X;X;X;X;Oxidation (M);Phospho (STY);X;X;X;X;Phospho (STY);X;X;X;X;X;X;X;X;X;X;X;X;X;X;X	XXXXXXXXXXXXXPPPPPPPPPPPPPXXXXX	ISS(1)PMHPSAGGQR	IS(-47.88)S(47.88)PMHPS(-59.27)AGGQR	3	3	0.29171
O00267;O00267-2	804;800	O00267	O00267	Transcription elongation factor SPT5	SUPT5H	>sp|O00267|SPT5H_HUMAN Transcription elongation factor SPT5 OS=Homo sapiens GN=SUPT5H PE=1 SV=1;>sp|O00267-2|SPT5H_HUMAN Isoform 2 of Transcription elongation factor SPT5 OS=Homo sapiens GN=SUPT5H	0.72679	4.26105	0.00213529	138.55	83.454	1	S	SQTPLQDGSRTPHYGSQTPLHDGSRTPAQSG	Phospho (STY);X;Phospho (STY);X;X;X;X;X;X;X;X;X;X;X;X;Phospho (STY);X;X;X;X;X;X;X;X;X;X;X;X;X;X;X	XXXXXXXXXXPPPPPPPPPPPPPPPXXXXXX	TPHY(0.001)GS(0.727)QT(0.272)PLHDGSR	T(-62.15)PHY(-30.35)GS(4.26)QT(-4.26)PLHDGS(-39.69)R	6	3	0.024871
O00267;O00267-2	789;785	O00267	O00267	Transcription elongation factor SPT5	SUPT5H	>sp|O00267|SPT5H_HUMAN Transcription elongation factor SPT5 OS=Homo sapiens GN=SUPT5H PE=1 SV=1;>sp|O00267-2|SPT5H_HUMAN Isoform 2 of Transcription elongation factor SPT5 OS=Homo sapiens GN=SUPT5H	0.673006	3.31004	8.41663e-05	100.18	61.188	1	S	QTPMYGSGSRTPMYGSQTPLQDGSRTPHYGS	X;Phospho (STY);X;X;X;X;X;X;X;X;X;X;X;X;X;Phospho (STY);X;X;X;X;X;X;X;X;X;X;X;X;X;X;Phospho (STY)	XXXXXXXXXXPPPPPPPPPPPPPPPXXXXXX	TPMY(0.013)GS(0.673)QT(0.314)PLQDGSR	T(-51.48)PMY(-17.17)GS(3.31)QT(-3.31)PLQDGS(-66.71)R	6	2	-0.61016
O00267;O00267-2	773;769	O00267	O00267	Transcription elongation factor SPT5	SUPT5H	>sp|O00267|SPT5H_HUMAN Transcription elongation factor SPT5 OS=Homo sapiens GN=SUPT5H PE=1 SV=1;>sp|O00267-2|SPT5H_HUMAN Isoform 2 of Transcription elongation factor SPT5 OS=Homo sapiens GN=SUPT5H	0.942898	14.5077	0.000637964	97.904	60.291	1	S	PGGMTSTYGRTPMYGSQTPMYGSGSRTPMYG	X;X;X;X;X;X;X;X;X;X;X;X;X;X;X;Phospho (STY);X;X;X;X;X;X;X;X;X;X;X;X;X;X;X	XXXXXXXXXXPPPPPPPPPPPPPPPPXXXXX	TPMY(0.008)GS(0.943)QT(0.033)PMY(0.01)GS(0.003)GS(0.003)R	T(-47.18)PMY(-20.97)GS(14.51)QT(-14.51)PMY(-19.74)GS(-24.88)GS(-24.88)R	6	2	-0.47432	0.80605														0.92478
O00273	315	O00273	O00273	DNA fragmentation factor subunit alpha	DFFA	>sp|O00273|DFFA_HUMAN DNA fragmentation factor subunit alpha OS=Homo sapiens GN=DFFA PE=1 SV=1	1	84.1759	4.61111e-05	321.02	260.48	1	S	TQSLHSLRSISASKASPPGDLQNPKRARQDP	X;X;X;X;X;X;X;X;X;X;X;X;X;X;X;Phospho (STY);X;X;X;X;X;X;X;X;X;X;X;X;X;X;X	XXXXXXXXPPPPPPPPPPPPPPPPPXXXXXX	SISASKAS(1)PPGDLQNPK	S(-172.27)IS(-146.75)AS(-84.18)KAS(84.18)PPGDLQNPK	8	3	0.064072	0.89368	0.63498	0.40467	0.66922	0.64302	0.84573	0.67191	0.79212	0.72307	0.79319	0.74978	0.55727	0.68737	0.65006	1.2354	0.76004	0.47528	0.47564	0.44561	0.60234	0.57939	0.40462	0.45904	0.53813	0.7861	1.4535	0.76788	1.3108
O00291;O00291-3;O00291-4	319;319;290	O00291	O00291	Huntingtin-interacting protein 1	HIP1	>sp|O00291|HIP1_HUMAN Huntingtin-interacting protein 1 OS=Homo sapiens GN=HIP1 PE=1 SV=5;>sp|O00291-3|HIP1_HUMAN Isoform 3 of Huntingtin-interacting protein 1 OS=Homo sapiens GN=HIP1;>sp|O00291-4|HIP1_HUMAN Isoform 4 of Huntingtin-interacting protein 1 OS=	0.802115	6.22348	1.54959e-24	130.57	114.88	1	S	LSEHISPVVVIPAEASSPDSEPVLEKDDLMD	X;X;X;X;X;X;X;X;X;X;X;X;X;X;X;Phospho (STY);X;X;X;X;X;X;X;X;X;X;X;X;X;X;X	PPPPPPPPPPPPPPPPPPPPPPPPPPXXXXX	ASALSEHISPVVVIPAEAS(0.802)S(0.191)PDS(0.006)EPVLEK	AS(-42.79)ALS(-42.79)EHIS(-34.51)PVVVIPAEAS(6.22)S(-6.22)PDS(-21.16)EPVLEK	19	4	0.36603			0.50361			1.0172
O00291;O00291-3;O00291-4	320;320;291	O00291	O00291	Huntingtin-interacting protein 1	HIP1	>sp|O00291|HIP1_HUMAN Huntingtin-interacting protein 1 OS=Homo sapiens GN=HIP1 PE=1 SV=5;>sp|O00291-3|HIP1_HUMAN Isoform 3 of Huntingtin-interacting protein 1 OS=Homo sapiens GN=HIP1;>sp|O00291-4|HIP1_HUMAN Isoform 4 of Huntingtin-interacting protein 1 OS=	0.882079	10.3716	7.63977e-25	136.37	109.97	1	S	SEHISPVVVIPAEASSPDSEPVLEKDDLMDM	X;X;X;X;X;X;X;X;X;X;X;X;X;X;X;Phospho (STY);X;X;X;X;X;X;X;X;X;X;X;X;X;X;X	PPPPPPPPPPPPPPPPPPPPPPPPPXXXXXX	ASALSEHISPVVVIPAEAS(0.081)S(0.882)PDS(0.037)EPVLEK	AS(-122.8)ALS(-123.01)EHIS(-120.36)PVVVIPAEAS(-10.37)S(10.37)PDS(-13.78)EPVLEK	20	3	0.15315					0.8127							0.80922	1.188	1.0215	0.6791				1.5454
O00291;O00291-3;O00291-4	323;323;294	O00291	O00291	Huntingtin-interacting protein 1	HIP1	>sp|O00291|HIP1_HUMAN Huntingtin-interacting protein 1 OS=Homo sapiens GN=HIP1 PE=1 SV=5;>sp|O00291-3|HIP1_HUMAN Isoform 3 of Huntingtin-interacting protein 1 OS=Homo sapiens GN=HIP1;>sp|O00291-4|HIP1_HUMAN Isoform 4 of Huntingtin-interacting protein 1 OS=	0.884507	11.8518	8.33837e-20	125.97	91.393	1	S	ISPVVVIPAEASSPDSEPVLEKDDLMDMDAS	X;X;X;X;X;X;X;X;X;X;X;X;X;X;X;Phospho (STY);X;X;X;X;X;X;X;X;X;X;X;X;X;X;X	PPPPPPPPPPPPPPPPPPPPPPXXXXXXXXX	ASALSEHISPVVVIPAEAS(0.058)S(0.058)PDS(0.885)EPVLEK	AS(-80.85)ALS(-79.36)EHIS(-77.55)PVVVIPAEAS(-11.85)S(-11.85)PDS(11.85)EPVLEK	23	3	0.41365																	1.143
O00299	156	O00299	O00299	Chloride intracellular channel protein 1	CLIC1	>sp|O00299|CLIC1_HUMAN Chloride intracellular channel protein 1 OS=Homo sapiens GN=CLIC1 PE=1 SV=4	0.944934	14.1987	3.14642e-07	83.992	59.672	1	S	DNYLTSPLPEEVDETSAEDEGVSQRKFLDGN	X;X;X;X;X;X;X;X;X;X;X;X;X;X;X;Phospho (STY);X;X;X;X;X;X;X;X;X;X;X;X;X;X;X	PPPPPPPPPPPPPPPPPPPPPPPPPPXXXXX	VLDNYLTS(0.001)PLPEEVDET(0.036)S(0.945)AEDEGVS(0.018)QRK	VLDNY(-53.15)LT(-48.43)S(-28.9)PLPEEVDET(-14.2)S(14.2)AEDEGVS(-17.23)QRK	18	3	0.33967					0.60436
O00303	258	O00303	O00303	Eukaryotic translation initiation factor 3 subunit F	EIF3F	>sp|O00303|EIF3F_HUMAN Eukaryotic translation initiation factor 3 subunit F OS=Homo sapiens GN=EIF3F PE=1 SV=1	1	88.4419	4.63203e-50	186.63	149.06	1	S	DTERIGVDLIMKTCFSPNRVIGLSSDLQQVG	X;X;X;X;X;X;X;X;X;X;X;X;X;X;X;Phospho (STY);X;X;X;X;X;X;X;X;X;X;X;X;X;X;X	XXXXXXXXXXXXPPPPPPPPPPPPPPPPPPP	TCFS(1)PNR	T(-88.44)CFS(88.44)PNR	4	2	0.16933	1.0307	0.80089			0.76223	0.86749	0.79663	0.76831	0.82906	0.84552	0.693	0.61459		0.64899	0.80723	0.83252	0.67584	0.77891	0.81219	0.73463	0.79841	0.99961	1.2042	1.0275	1.0886	0.78357	0.96328	0.71079
O00308;O00308-4;O00308-2	211;211;95	O00308	O00308	NEDD4-like E3 ubiquitin-protein ligase WWP2	WWP2	>sp|O00308|WWP2_HUMAN NEDD4-like E3 ubiquitin-protein ligase WWP2 OS=Homo sapiens GN=WWP2 PE=1 SV=2;>sp|O00308-4|WWP2_HUMAN Isoform 4 of NEDD4-like E3 ubiquitin-protein ligase WWP2 OS=Homo sapiens GN=WWP2;>sp|O00308-2|WWP2_HUMAN Isoform 2 of NEDD4-like E3	0.998251	27.5661	5.76053e-05	106.82	83.096	1	S	HSGASARTTPATGEQSPGARSRHRQPVKNSG	X;X;X;X;X;X;X;X;X;X;X;X;X;X;X;Phospho (STY);X;X;X;X;X;X;X;X;X;X;X;X;X;X;X	XXXXXXXPPPPPPPPPPPPPXXXXXXXXXXX	TTPAT(0.002)GEQS(0.998)PGAR	T(-77.3)T(-68.36)PAT(-27.57)GEQS(27.57)PGAR	9	2	-0.60857									0.62087	0.50669		0.26739						0.68901								0.45453
O00311	302	O00311	O00311	Cell division cycle 7-related protein kinase	CDC7	>sp|O00311|CDC7_HUMAN Cell division cycle 7-related protein kinase OS=Homo sapiens GN=CDC7 PE=1 SV=1	1	98.8326	0.000682225	218.34	156.24	1	S	FGERNFNIHSSISHESPAVKLMKQSKTVDVL	X;X;X;X;X;X;X;X;X;X;X;X;X;X;X;Phospho (STY);X;X;X;X;X;X;X;X;X;X;X;X;X;X;X	XXXXPPPPPPPPPPPPPPPPXXXXXXXXXXX	NFNIHSSISHES(1)PAVK	NFNIHS(-148.73)S(-121.53)IS(-98.83)HES(98.83)PAVK	12	3	-0.53286
O00410;O00410-2;O00410-3	827;767;845	O00410	O00410	Importin-5	IPO5	>sp|O00410|IPO5_HUMAN Importin-5 OS=Homo sapiens GN=IPO5 PE=1 SV=4;>sp|O00410-2|IPO5_HUMAN Isoform 2 of Importin-5 OS=Homo sapiens GN=IPO5;>sp|O00410-3|IPO5_HUMAN Isoform 3 of Importin-5 OS=Homo sapiens GN=IPO5	1	80.707	8.34513e-19	133.17	115.8	1	S	QVKRQDEDYDEQVEESLQDEDDNDVYILTKV	X;X;X;X;X;X;X;X;X;X;X;X;X;X;X;Phospho (STY);X;X;X;X;X;X;X;X;X;X;X;X;X;X;X	XXXPPPPPPPPPPPPPPPPPPPPPPPPPPPX	RQDEDYDEQVEES(1)LQDEDDNDVYILTK	RQDEDY(-80.71)DEQVEES(80.71)LQDEDDNDVY(-88.87)ILT(-100.62)K	13	3	0.092331
O00418	74	O00418	O00418	Eukaryotic elongation factor 2 kinase	EEF2K	>sp|O00418|EF2K_HUMAN Eukaryotic elongation factor 2 kinase OS=Homo sapiens GN=EEF2K PE=1 SV=2	1	88.1858	0.000462214	284.62	251.53	1	S	YYSNLTKSERYSSSGSPANSFHFKEAWKHAI	X;X;X;X;X;X;X;X;X;X;X;X;X;X;X;Phospho (STY);X;X;X;X;X;X;X;X;X;X;X;X;X;X;X	XXXXXXXXXXPPPPPPPPPPPPPPXXXXXXX	YSSSGS(1)PANSFHFK	Y(-167.79)S(-147.82)S(-123.43)S(-88.19)GS(88.19)PANS(-88.25)FHFK	6	3	0.08277	0.98364	0.71492	0.3844												0.71063	0.97308		1.0713	0.69145	0.99184	0.67366	0.66545	0.49565
O00429;O00429-4;O00429-5;O00429-3;O00429-2;O00429-8;O00429-6;O00429-7	616;579;590;590;605;618;629;413	O00429	O00429	Dynamin-1-like protein	DNM1L	>sp|O00429|DNM1L_HUMAN Dynamin-1-like protein OS=Homo sapiens GN=DNM1L PE=1 SV=2;>sp|O00429-4|DNM1L_HUMAN Isoform 3 of Dynamin-1-like protein OS=Homo sapiens GN=DNM1L;>sp|O00429-5|DNM1L_HUMAN Isoform 5 of Dynamin-1-like protein OS=Homo sapiens GN=DNM1L;>sp	1	152.64	0.000205262	197.21	169.57	1	S	LLAEEKSKPIPIMPASPQKGHAVNLLDVPVP	X;X;X;X;X;X;X;X;X;X;X;X;Oxidation (M);X;X;Phospho (STY);X;X;X;X;X;X;X;X;X;X;X;X;X;X;X	XXXXXXPPPPPPPPPPPPPXXXXXXXXXXXX	SKPIPIMPAS(1)PQK	S(-152.64)KPIPIMPAS(152.64)PQK	10	3	-0.22553	0.82354	0.62728	0.46747	0.73004	0.60996	0.78383	0.624	0.72869	0.7025	0.66597	0.59112	0.37592	0.4238	0.31508	0.73901	0.75418	0.70007	0.59396	0.71616	0.66665	0.62536	0.6881	0.67299	0.65718	0.8434	0.51721	0.54502	0.37245
O00443	1551	O00443	O00443	Phosphatidylinositol 4-phosphate 3-kinase C2 domain-containing subunit alpha	PIK3C2A	>sp|O00443|P3C2A_HUMAN Phosphatidylinositol 4-phosphate 3-kinase C2 domain-containing subunit alpha OS=Homo sapiens GN=PIK3C2A PE=1 SV=2	0.568207	4.20804	0.00389364	60.325	40.276	1;2	S	RDEKAEGIARSADAGSFSPTPGQIGGAVKLS	X;X;X;X;X;X;X;X;X;X;X;X;X;X;X;Phospho (STY);X;X;X;Phospho (STY);X;X;X;X;X;X;X;X;X;X;X	XXXXPPPPPPPPPPPPPPPPPPPPPPPPPXX	S(0.001)ADAGS(0.568)FS(0.216)PT(0.216)PGQIGGAVK	S(-30.23)ADAGS(4.21)FS(-4.21)PT(-4.21)PGQIGGAVK	6	3	0.071868						0.93915
O00443	1553	O00443	O00443	Phosphatidylinositol 4-phosphate 3-kinase C2 domain-containing subunit alpha	PIK3C2A	>sp|O00443|P3C2A_HUMAN Phosphatidylinositol 4-phosphate 3-kinase C2 domain-containing subunit alpha OS=Homo sapiens GN=PIK3C2A PE=1 SV=2	0.998737	30.9359	5.64216e-10	140.24	84.489	1;2	S	EKAEGIARSADAGSFSPTPGQIGGAVKLSIS	X;X;X;X;X;X;X;X;X;X;X;X;X;X;X;Phospho (STY);X;X;X;X;X;X;X;X;X;X;X;X;X;X;X	XXXXXXXXPPPPPPPPPPPPPPPPPPPXXXX	SADAGSFS(0.999)PT(0.001)PGQIGGAVK	S(-69.51)ADAGS(-33.39)FS(30.94)PT(-30.94)PGQIGGAVK	8	2	0.83504							0.67118		0.64497	0.50363	0.46466					0.73498			0.572					0.57862	0.57704	0.48931	0.5908
O00443;O00443-2	108;108	O00443	O00443	Phosphatidylinositol 4-phosphate 3-kinase C2 domain-containing subunit alpha	PIK3C2A	>sp|O00443|P3C2A_HUMAN Phosphatidylinositol 4-phosphate 3-kinase C2 domain-containing subunit alpha OS=Homo sapiens GN=PIK3C2A PE=1 SV=2;>sp|O00443-2|P3C2A_HUMAN Isoform 2 of Phosphatidylinositol 4-phosphate 3-kinase C2 domain-containing subunit alpha OS=H	0.999989	49.5636	1.73673e-05	124.47	91.152	1	S	EKLTQAELEKLLLDDSFETKKTPVLPVTPIL	X;X;X;X;X;X;X;X;X;X;X;X;X;X;X;Phospho (STY);X;X;X;X;X;X;X;X;X;X;X;X;X;X;X	XXXXXXXXXXPPPPPPPPPPXXXXXXXXXXX	LLLDDS(1)FETK	LLLDDS(49.56)FET(-49.56)K	6	2	-0.13916
O00443;O00443-2	259;259	O00443	O00443	Phosphatidylinositol 4-phosphate 3-kinase C2 domain-containing subunit alpha	PIK3C2A	>sp|O00443|P3C2A_HUMAN Phosphatidylinositol 4-phosphate 3-kinase C2 domain-containing subunit alpha OS=Homo sapiens GN=PIK3C2A PE=1 SV=2;>sp|O00443-2|P3C2A_HUMAN Isoform 2 of Phosphatidylinositol 4-phosphate 3-kinase C2 domain-containing subunit alpha OS=H	0.999995	52.9981	0.00142031	83.204	47.526	1	S	TDLEITDSKVSNLQVSPKSEDISKFDWLDLD	X;X;X;X;X;X;X;X;X;X;X;X;X;X;X;Phospho (STY);X;X;X;X;X;X;X;X;X;X;X;X;X;X;X	XXXXXXXXXPPPPPPPPPXXXXXXXXXXXXX	VSNLQVS(1)PK	VS(-53)NLQVS(53)PK	7	2	-0.26679	0.81212	0.70673					0.6709	0.86493			0.71525	0.57365	0.77143	0.73142	0.76783	1.4725	0.98466	0.6981	0.8504	0.91668	0.55183	0.75183	0.6679	0.70075	0.7522		0.62979	0.33763
O00472;O00472-2	420;170	O00472	O00472	RNA polymerase II elongation factor ELL2	ELL2	>sp|O00472|ELL2_HUMAN RNA polymerase II elongation factor ELL2 OS=Homo sapiens GN=ELL2 PE=1 SV=2;>sp|O00472-2|ELL2_HUMAN Isoform 2 of RNA polymerase II elongation factor ELL2 OS=Homo sapiens GN=ELL2	0.860412	8.17319	0.00225919	51.777	21.243	1	S	RGTQDLPVDSFSQNDSIYEDQQDKYTSRTSL	X;X;X;X;X;X;X;X;X;X;X;X;X;X;X;Phospho (STY);X;X;X;X;X;X;X;X;X;X;X;X;X;X;X	XPPPPPPPPPPPPPPPPPPPPPPPXXXXXXX	GTQDLPVDS(0.001)FS(0.007)QNDS(0.86)IY(0.131)EDQQDK	GT(-36.18)QDLPVDS(-28.59)FS(-20.8)QNDS(8.17)IY(-8.17)EDQQDK	15	3	-0.31403																				0.6352	0.7173			0.50562
O00488	133	O00488	O00488	Zinc finger protein 593	ZNF593	>sp|O00488|ZN593_HUMAN Zinc finger protein 593 OS=Homo sapiens GN=ZNF593 PE=1 SV=2	0.827483	9.81957	3.27457e-40	200	162.83	1	S	AVPTEVSTEVPEMDTST______________	X;X;X;X;X;X;X;X;X;X;X;X;Oxidation (M);X;X;Phospho (STY);X;X;X;X;X;X;X;X;X;X;X;X;X;X;X	PPPPPPPPPPPPPPPPPXXXXXXXXXXXXXX	LAVPTEVSTEVPEMDT(0.086)S(0.827)T(0.086)	LAVPT(-190.43)EVS(-167.17)T(-143.96)EVPEMDT(-9.82)S(9.82)T(-9.82)	17	3	0.1866											0.61436
O00499;O00499-2;O00499-6;O00499-11;O00499-10;O00499-9;O00499-7;O00499-8;O00499-4;O00499-3;O00499-5	296;265;265;280;280;265;265;280;265;296;296	O00499	O00499	Myc box-dependent-interacting protein 1	BIN1	>sp|O00499|BIN1_HUMAN Myc box-dependent-interacting protein 1 OS=Homo sapiens GN=BIN1 PE=1 SV=1;>sp|O00499-2|BIN1_HUMAN Isoform IIB of Myc box-dependent-interacting protein 1 OS=Homo sapiens GN=BIN1;>sp|O00499-6|BIN1_HUMAN Isoform II2 of Myc box-dependent-	1	77.2407	1.53648e-20	190.57	153.13	1;2;3;4	S	VKAQPSDNAPAKGNKSPSPPDGSPAATPEIR	X;X;X;X;X;X;X;X;X;X;X;X;X;X;X;Phospho (STY);X;Phospho (STY);X;X;X;X;Phospho (STY);X;X;X;Phospho (STY);X;X;X;X	XXXXXXXXXXXXPPPPPPPPPPPPPPPPPPP	GNKS(1)PS(1)PPDGS(1)PAAT(1)PEIR	GNKS(77.24)PS(77.24)PPDGS(77.24)PAAT(77.24)PEIR	4	3	0.05799	0.93257	0.56529	0.43158	0.69351	0.69815	0.79708	0.59663	0.71468	0.71275	0.6132	0.5966	0.55984	0.75655	0.66236	0.85691	0.82825	0.82315	0.82873	0.84045	1.07	1.0551	0.69068	0.78216	1.2581	0.84859	1.1196	1.3712	1.545
O00499;O00499-2;O00499-6;O00499-11;O00499-10;O00499-9;O00499-7;O00499-8;O00499-4;O00499-3;O00499-5	298;267;267;282;282;267;267;282;267;298;298	O00499	O00499	Myc box-dependent-interacting protein 1	BIN1	>sp|O00499|BIN1_HUMAN Myc box-dependent-interacting protein 1 OS=Homo sapiens GN=BIN1 PE=1 SV=1;>sp|O00499-2|BIN1_HUMAN Isoform IIB of Myc box-dependent-interacting protein 1 OS=Homo sapiens GN=BIN1;>sp|O00499-6|BIN1_HUMAN Isoform II2 of Myc box-dependent-	1	77.2407	1.7515e-18	190.57	153.13	2;3;4	S	AQPSDNAPAKGNKSPSPPDGSPAATPEIRVN	X;X;X;X;X;X;X;X;X;X;X;X;X;Phospho (STY);X;Phospho (STY);X;X;X;X;Phospho (STY);X;X;X;Phospho (STY);X;X;X;X;X;X	XXXXXXXXXXPPPPPPPPPPPPPPPPPPPXX	GNKS(1)PS(1)PPDGS(1)PAAT(1)PEIR	GNKS(77.24)PS(77.24)PPDGS(77.24)PAAT(77.24)PEIR	6	3	0.05799	1.0644	0.74414	0.4174	0.78965	0.75448	0.65186	0.59663	0.6348	0.65732	0.60515	0.71418	0.46876	0.61743	0.65813	0.79472	0.56356	0.54419	0.71901	0.74188	0.47861	0.75066	0.80329	0.86214	0.80047	0.98483	0.43595	0.86552	0.39147
O00499;O00499-2;O00499-6;O00499-11;O00499-10;O00499-9;O00499-7;O00499-8;O00499-4;O00499-3;O00499-5	303;272;272;287;287;272;272;287;272;303;303	O00499	O00499	Myc box-dependent-interacting protein 1	BIN1	>sp|O00499|BIN1_HUMAN Myc box-dependent-interacting protein 1 OS=Homo sapiens GN=BIN1 PE=1 SV=1;>sp|O00499-2|BIN1_HUMAN Isoform IIB of Myc box-dependent-interacting protein 1 OS=Homo sapiens GN=BIN1;>sp|O00499-6|BIN1_HUMAN Isoform II2 of Myc box-dependent-	1	77.2407	1.53648e-20	190.57	153.13	1;2;3;4	S	NAPAKGNKSPSPPDGSPAATPEIRVNHEPEP	X;X;X;X;X;X;X;X;Phospho (STY);X;Phospho (STY);X;X;X;X;Phospho (STY);X;X;X;Phospho (STY);X;X;X;X;X;X;X;X;X;X;X	XXXXXPPPPPPPPPPPPPPPPPPPXXXXXXX	GNKS(1)PS(1)PPDGS(1)PAAT(1)PEIR	GNKS(77.24)PS(77.24)PPDGS(77.24)PAAT(77.24)PEIR	11	3	0.05799	0.93257	0.56529	0.43158	0.69351	0.69815	0.79708	0.6128	0.71468	0.6062	0.6132	0.5966	0.55984	0.66967	0.66236	0.85691	0.73366	0.60392	0.73684	0.69248	0.70455	0.63875	0.87241	0.84813	0.80952	0.91417	0.82095	0.90262	0.6541
O00499;O00499-2;O00499-6;O00499-11	331;300;300;315	O00499	O00499	Myc box-dependent-interacting protein 1	BIN1	>sp|O00499|BIN1_HUMAN Myc box-dependent-interacting protein 1 OS=Homo sapiens GN=BIN1 PE=1 SV=1;>sp|O00499-2|BIN1_HUMAN Isoform IIB of Myc box-dependent-interacting protein 1 OS=Homo sapiens GN=BIN1;>sp|O00499-6|BIN1_HUMAN Isoform II2 of Myc box-dependent-	0.811926	6.35364	8.07842e-06	107.25	74.449	2	S	PEPAGGATPGATLPKSPSQLRKGPPVPPPPK	X;X;X;X;X;X;X;Phospho (STY);X;X;X;X;X;X;X;Phospho (STY);X;X;X;X;X;X;X;X;X;X;X;X;X;X;X	PPPPPPPPPPPPPPPPPPPPPPXXXXXXXXX	VNHEPEPAGGAT(0.997)PGAT(0.003)LPKS(0.812)PS(0.188)QLR	VNHEPEPAGGAT(24.87)PGAT(-24.87)LPKS(6.35)PS(-6.35)QLR	20	3	0.092538																										0.33337
O00499;O00499-2;O00499-6;O00499-11	333;302;302;317	O00499	O00499	Myc box-dependent-interacting protein 1	BIN1	>sp|O00499|BIN1_HUMAN Myc box-dependent-interacting protein 1 OS=Homo sapiens GN=BIN1 PE=1 SV=1;>sp|O00499-2|BIN1_HUMAN Isoform IIB of Myc box-dependent-interacting protein 1 OS=Homo sapiens GN=BIN1;>sp|O00499-6|BIN1_HUMAN Isoform II2 of Myc box-dependent-	0.844632	7.44964	0.00104605	94.339	73.391	1	S	PAGGATPGATLPKSPSQLRKGPPVPPPPKHT	X;X;X;X;X;Phospho (STY);X;X;X;X;X;X;X;X;X;Phospho (STY);X;X;X;X;X;X;X;X;X;X;X;X;X;X;X	PPPPPPPPPPPPPPPPPPPPXXXXXXXXXXX	VNHEPEPAGGAT(0.001)PGAT(0.003)LPKS(0.152)PS(0.845)QLRK	VNHEPEPAGGAT(-31.42)PGAT(-24.78)LPKS(-7.45)PS(7.45)QLRK	22	4	0.035518
O00505	56	O00505	O00505	Importin subunit alpha-4	KPNA3	>sp|O00505|IMA4_HUMAN Importin subunit alpha-4 OS=Homo sapiens GN=KPNA3 PE=1 SV=2	1	82.0101	5.45904e-05	117.78	97.029	1;2	S	RDEHLLKKRNVPQEESLEDSDVDADFKAQNV	X;X;X;X;X;X;X;X;X;X;X;X;X;X;X;Phospho (STY);X;X;X;Phospho (STY);X;X;X;X;X;X;X;X;X;X;X	XXXXXXXXPPPPPPPPPPPPPPPPPPPXXXX	RNVPQEES(1)LEDS(1)DVDADFK	RNVPQEES(82.01)LEDS(82.01)DVDADFK	8	3	0.053029			0.90057	1.5301	1.5379	1.6256	1.4586	1.2592	1.2991	0.98101		0.9721	1.0475	1.1275	0.82976	0.80397	1.0588	0.90307	1.2501	0.80673	0.77646	0.78366	0.8829	0.73304	0.89501	0.6343	0.68627	0.47322
O00505	60	O00505	O00505	Importin subunit alpha-4	KPNA3	>sp|O00505|IMA4_HUMAN Importin subunit alpha-4 OS=Homo sapiens GN=KPNA3 PE=1 SV=2	1	82.0101	1.37317e-96	234.53	194.61	1;2	S	LLKKRNVPQEESLEDSDVDADFKAQNVTLEA	X;X;X;X;X;X;X;X;X;X;X;Phospho (STY);X;X;X;Phospho (STY);X;X;X;X;X;X;X;X;X;X;X;X;X;X;X	XXXXPPPPPPPPPPPPPPPPPPPXXXXXXXX	RNVPQEES(1)LEDS(1)DVDADFK	RNVPQEES(82.01)LEDS(82.01)DVDADFK	12	3	0.053029	0.98816	0.66609	0.41722	0.82719	0.65265	0.76885	1.1264	0.69308	0.63857	0.8294	0.61347	0.78953	0.47887	0.78771	0.70628	0.49008	0.59641	0.68682	0.69004	0.48715	0.46378	0.58756	0.73129	0.48078	0.61989	0.67	0.57382	0.51641
O00512	687	O00512	O00512	B-cell CLL/lymphoma 9 protein	BCL9	>sp|O00512|BCL9_HUMAN B-cell CLL/lymphoma 9 protein OS=Homo sapiens GN=BCL9 PE=1 SV=4	0.996167	24.1479	0.000459888	237.21	190.51	1	S	GNNPIFPRIPVEGPLSPSRGDFPKGIPPQMG	X;X;X;X;X;X;X;X;X;X;X;X;X;X;X;Phospho (STY);X;X;X;X;X;X;X;X;X;X;X;X;X;X;X	XXXXXXXXPPPPPPPPPPPPPPPPXXXXXXX	IPVEGPLS(0.996)PS(0.004)RGDFPK	IPVEGPLS(24.15)PS(-24.15)RGDFPK	8	3	0.045221															0.75752	0.75778	0.51891				0.5328
O00512	689	O00512	O00512	B-cell CLL/lymphoma 9 protein	BCL9	>sp|O00512|BCL9_HUMAN B-cell CLL/lymphoma 9 protein OS=Homo sapiens GN=BCL9 PE=1 SV=4	0.867817	8.17252	0.000736485	191.79	122.25	1	S	NPIFPRIPVEGPLSPSRGDFPKGIPPQMGPG	X;X;X;X;X;X;X;X;X;X;X;X;X;X;X;Phospho (STY);X;X;X;X;X;X;X;X;X;X;X;X;X;X;X	XXXXXXPPPPPPPPPPPPPPPPXXXXXXXXX	IPVEGPLS(0.132)PS(0.868)RGDFPK	IPVEGPLS(-8.17)PS(8.17)RGDFPK	10	3	-0.33053
O00512	857	O00512	O00512	B-cell CLL/lymphoma 9 protein	BCL9	>sp|O00512|BCL9_HUMAN B-cell CLL/lymphoma 9 protein OS=Homo sapiens GN=BCL9 PE=1 SV=4	0.999987	48.963	2.28622e-05	81.316	64.702	1	S	GRKPLDISVAGSQVHSPGINPLKSPTMHQVQ	X;X;X;X;X;X;X;X;X;X;X;X;X;X;X;Phospho (STY);X;X;X;X;X;X;X;X;X;X;X;X;X;X;X	XXPPPPPPPPPPPPPPPPPPPPPXXXXXXXX	KPLDISVAGSQVHS(1)PGINPLK	KPLDIS(-62.69)VAGS(-48.96)QVHS(48.96)PGINPLK	14	3	0.62558
O00512	35	O00512	O00512	B-cell CLL/lymphoma 9 protein	BCL9	>sp|O00512|BCL9_HUMAN B-cell CLL/lymphoma 9 protein OS=Homo sapiens GN=BCL9 PE=1 SV=4	0.981334	18.3379	0.000207984	74.63	50.386	1	S	PKSKQEVMVRPPTVMSPSGNPQLDSKFSNQG	X;X;X;X;X;X;X;X;X;X;X;X;X;X;X;Phospho (STY);X;X;X;X;X;X;X;X;X;X;X;X;X;X;X	XXXXPPPPPPPPPPPPPPPPPPPPPPXXXXX	QEVMVRPPT(0.014)VMS(0.981)PS(0.004)GNPQLDSK	QEVMVRPPT(-18.34)VMS(18.34)PS(-23.64)GNPQLDS(-44.96)K	12	3	0.84748
O00512	102	O00512	O00512	B-cell CLL/lymphoma 9 protein	BCL9	>sp|O00512|BCL9_HUMAN B-cell CLL/lymphoma 9 protein OS=Homo sapiens GN=BCL9 PE=1 SV=4	0.494768	0	0.0010073	66.075	44.585		S	NGAGNGAKGKGKRERSISADSFDQRDPGTPN	X;X;X;X;X;X;X;X;X;X;X;X;X;X;X;Phospho (STY);X;X;X;X;X;X;X;X;X;X;X;X;X;X;X	XXXXXXXXXXXXXXXPPPPPPPPPPPPPPPP	S(0.495)IS(0.495)ADS(0.01)FDQRDPGTPNDDSDIK	S(0)IS(0)ADS(-16.84)FDQRDPGT(-33.59)PNDDS(-51.57)DIK	1	3	0.076168
O00512	104	O00512	O00512	B-cell CLL/lymphoma 9 protein	BCL9	>sp|O00512|BCL9_HUMAN B-cell CLL/lymphoma 9 protein OS=Homo sapiens GN=BCL9 PE=1 SV=4	0.788746	6.13107	0.0010073	66.075	44.585	1	S	AGNGAKGKGKRERSISADSFDQRDPGTPNDD	X;X;X;X;X;X;X;X;X;X;X;X;X;X;X;Phospho (STY);X;X;X;X;X;X;X;X;X;X;X;X;X;X;X	XXXXXXXXXXXXXPPPPPPPPPPPPPPPPPP	S(0.192)IS(0.789)ADS(0.018)FDQRDPGT(0.001)PNDDSDIK	S(-6.13)IS(6.13)ADS(-16.5)FDQRDPGT(-28.52)PNDDS(-34.65)DIK	3	3	0.10643
O00512	153	O00512	O00512	B-cell CLL/lymphoma 9 protein	BCL9	>sp|O00512|BCL9_HUMAN B-cell CLL/lymphoma 9 protein OS=Homo sapiens GN=BCL9 PE=1 SV=4	0.406422	0	0.000210297	96.067	57.83		S	HTPHSMTPSNATAPRSSTPSHGQTTATEPTP	X;Phospho (STY);X;X;Phospho (STY);X;Phospho (STY);X;Phospho (STY);X;X;X;X;X;X;Phospho (STY);X;X;X;X;X;X;X;X;X;X;X;X;X;X;X	XXXXXXXXXXXXXXXPPPPPPPPPPPPPPPP	S(0.406)S(0.406)T(0.112)PS(0.033)HGQT(0.02)T(0.02)AT(0.002)EPT(0.002)PAQKT(0.998)PAK	S(0)S(0)T(-5.61)PS(-10.96)HGQT(-13.07)T(-13.07)AT(-22.65)EPT(-27.64)PAQKT(27.64)PAK	1	3	0.26842
O00512	154	O00512	O00512	B-cell CLL/lymphoma 9 protein	BCL9	>sp|O00512|BCL9_HUMAN B-cell CLL/lymphoma 9 protein OS=Homo sapiens GN=BCL9 PE=1 SV=4	0.665392	6.89296	2.17775e-05	96.067	57.83	2	S	TPHSMTPSNATAPRSSTPSHGQTTATEPTPA	Phospho (STY);X;X;Phospho (STY);X;Phospho (STY);X;Phospho (STY);X;X;X;X;X;X;X;Phospho (STY);X;X;X;X;X;X;X;X;X;X;X;X;X;X;X	XXXXXXXXXXXXXXPPPPPPPPPPPPPPPPP	S(0.138)S(0.665)T(0.138)PS(0.035)HGQT(0.011)T(0.01)AT(0.004)EPT(0.174)PAQKT(0.824)PAK	S(-6.89)S(6.89)T(-6.89)PS(-12.92)HGQT(-18.27)T(-18.66)AT(-22.4)EPT(-6.89)PAQKT(6.89)PAK	2	3	0.18146																0.76344
O00512	157	O00512	O00512	B-cell CLL/lymphoma 9 protein	BCL9	>sp|O00512|BCL9_HUMAN B-cell CLL/lymphoma 9 protein OS=Homo sapiens GN=BCL9 PE=1 SV=4	0.512168	4.70545	0.000273955	96.067	57.83	2	S	SMTPSNATAPRSSTPSHGQTTATEPTPAQKT	Phospho (STY);X;Phospho (STY);X;Phospho (STY);X;X;X;X;X;X;X;X;X;X;Phospho (STY);X;X;X;X;X;X;X;X;X;X;X;X;X;X;Phospho (STY)	XXXXXXXXXXXPPPPPPPPPPPPPPPPPPPP	S(0.046)S(0.173)T(0.173)PS(0.512)HGQT(0.044)T(0.044)AT(0.008)EPT(0.001)PAQKT(0.999)PAK	S(-10.5)S(-4.71)T(-4.71)PS(4.71)HGQT(-10.71)T(-10.71)AT(-18.22)EPT(-33.87)PAQKT(35.08)PAK	5	3	0.11089																											0.28082
O00541	307	O00541	O00541	Pescadillo homolog	PES1	>sp|O00541|PESC_HUMAN Pescadillo homolog OS=Homo sapiens GN=PES1 PE=1 SV=1	0.800163	6.02535	0.00130269	49.266	19.702	1	S	EEEAEVDEFPTDGEMSAQEEDRRKELEAQEK	X;X;X;X;X;X;X;X;X;X;X;X;X;X;X;Phospho (STY);X;X;X;X;X;X;X;X;X;X;X;X;X;X;X	PPPPPPPPPPPPPPPPPPPPPPPPXXXXXXX	VVVPATEEEAEVDEFPT(0.2)DGEMS(0.8)AQEEDRRK	VVVPAT(-47.37)EEEAEVDEFPT(-6.03)DGEMS(6.03)AQEEDRRK	22	4	-3.3856
O00559;O00559-2	36;36	O00559	O00559	Receptor-binding cancer antigen expressed on SiSo cells	EBAG9	>sp|O00559|RCAS1_HUMAN Receptor-binding cancer antigen expressed on SiSo cells OS=Homo sapiens GN=EBAG9 PE=1 SV=1;>sp|O00559-2|RCAS1_HUMAN Isoform 2 of Receptor-binding cancer antigen expressed on SiSo cells OS=Homo sapiens GN=EBAG9	1	75.8568	1.17395e-09	135.63	103.17	1	S	FLKRLICRSGRGRKLSGDQITLPTTVDYSSV	X;X;X;X;X;X;X;X;X;X;X;X;X;X;X;Phospho (STY);X;X;X;X;X;X;X;X;X;X;X;X;X;X;X	XXXXXXXXXXXXXPPPPPPPPPPPPPPPPPP	KLS(1)GDQITLPTTVDYSSVPK	KLS(75.86)GDQIT(-75.86)LPT(-98.74)T(-100.49)VDY(-128.35)S(-120.04)S(-120.04)VPK	3	2	0.17662	1.0995	0.54601	0.63299	0.90391	0.62674	0.805						0.64732	1.0362		0.98652
O00559;O00559-2	62;62	O00559	O00559	Receptor-binding cancer antigen expressed on SiSo cells	EBAG9	>sp|O00559|RCAS1_HUMAN Receptor-binding cancer antigen expressed on SiSo cells OS=Homo sapiens GN=EBAG9 PE=1 SV=1;>sp|O00559-2|RCAS1_HUMAN Isoform 2 of Receptor-binding cancer antigen expressed on SiSo cells OS=Homo sapiens GN=EBAG9	0.999766	36.3032	1.90995e-40	183.25	153.39	1	S	DYSSVPKQTDVEEWTSWDEDAPTSVKIEGGN	X;X;X;X;X;X;X;X;X;X;X;X;X;X;X;Phospho (STY);X;X;X;X;X;X;X;X;X;X;X;X;X;X;X	XXXXXXXPPPPPPPPPPPPPPPPPPPXXXXX	QTDVEEWTS(1)WDEDAPTSVK	QT(-107.53)DVEEWT(-36.3)S(36.3)WDEDAPT(-71.8)S(-75.78)VK	9	2	-0.1926							1.1347	0.83333	1.1151	1.1881	1.3968			0.8692	1.3078	0.99804
O00566	242	O00566	O00566	U3 small nucleolar ribonucleoprotein protein MPP10	MPHOSPH10	>sp|O00566|MPP10_HUMAN U3 small nucleolar ribonucleoprotein protein MPP10 OS=Homo sapiens GN=MPHOSPH10 PE=1 SV=2	0.998357	27.8356	0.00026023	50.413	38.05	1	S	NDEEEEDIDFFEDIDSDEDEGGLFGSKKLKS	X;X;X;X;X;X;X;X;X;X;X;X;X;X;X;Phospho (STY);X;X;X;X;X;X;X;X;X;X;X;X;X;X;X	PPPPPPPPPPPPPPPPPPPPPPPPPPPXXXX	EEERKDDNDEEEEDIDFFEDIDS(0.998)DEDEGGLFGS(0.002)K	EEERKDDNDEEEEDIDFFEDIDS(27.84)DEDEGGLFGS(-27.84)K	23	4	-0.35216
O00566	158	O00566	O00566	U3 small nucleolar ribonucleoprotein protein MPP10	MPHOSPH10	>sp|O00566|MPP10_HUMAN U3 small nucleolar ribonucleoprotein protein MPP10 OS=Homo sapiens GN=MPHOSPH10 PE=1 SV=2	0.963149	14.2293	0.000408651	71.969	55.567	3	S	NDDPEMGERAENSSKSDLRKSPVFSDEDSDL	X;X;X;X;X;X;X;X;X;X;X;X;X;X;X;Phospho (STY);X;X;X;X;X;X;X;X;Phospho (STY);X;X;X;Phospho (STY);X;X	XXXXXXXXXXXXXXXPPPPPPPPPPPPPPPP	S(0.963)DLRKS(0.048)PVFS(0.988)DEDS(0.991)DLDFDIS(0.01)K	S(14.23)DLRKS(-14.23)PVFS(19.27)DEDS(20.8)DLDFDIS(-20.8)K	1	3	0.017454																		0.53808						0.53434		0.32434		0.39405
O00566	163	O00566	O00566	U3 small nucleolar ribonucleoprotein protein MPP10	MPHOSPH10	>sp|O00566|MPP10_HUMAN U3 small nucleolar ribonucleoprotein protein MPP10 OS=Homo sapiens GN=MPHOSPH10 PE=1 SV=2	0.99418	22.4437	0.000408651	71.969	55.567	3	S	MGERAENSSKSDLRKSPVFSDEDSDLDFDIS	X;X;X;X;X;X;X;X;X;X;X;X;X;X;X;Phospho (STY);X;X;X;Phospho (STY);X;X;X;Phospho (STY);X;X;X;X;X;X;X	XXXXXXXXXXPPPPPPPPPPPPPPPPPPPPP	S(0.006)DLRKS(0.994)PVFS(0.999)DEDS(0.991)DLDFDIS(0.01)K	S(-22.44)DLRKS(22.44)PVFS(30.61)DEDS(20.65)DLDFDIS(-20.65)K	6	3	0.29045															1.0636		0.57668	0.53808	0.54908		0.51965	0.53015	0.54121			0.32434	0.43858	0.39405
O00566	167	O00566	O00566	U3 small nucleolar ribonucleoprotein protein MPP10	MPHOSPH10	>sp|O00566|MPP10_HUMAN U3 small nucleolar ribonucleoprotein protein MPP10 OS=Homo sapiens GN=MPHOSPH10 PE=1 SV=2	0.99953	33.7105	0.000408651	71.969	55.567	3	S	AENSSKSDLRKSPVFSDEDSDLDFDISKLEQ	X;X;X;X;X;X;Phospho (STY);X;X;X;X;Phospho (STY);X;X;X;Phospho (STY);X;X;X;Phospho (STY);X;X;X;X;X;X;X;X;X;X;X	XXXXXXPPPPPPPPPPPPPPPPPPPPPPXXX	S(0.071)DLRKS(0.93)PVFS(1)DEDS(0.989)DLDFDIS(0.011)K	S(-11.24)DLRKS(11.24)PVFS(33.71)DEDS(19.6)DLDFDIS(-19.6)K	10	3	0.38054															1.0636		0.57668	0.53808	0.54908		0.51965	0.53015	0.54121	0.53434		0.32434	0.43858	0.39405
O00566	171	O00566	O00566	U3 small nucleolar ribonucleoprotein protein MPP10	MPHOSPH10	>sp|O00566|MPP10_HUMAN U3 small nucleolar ribonucleoprotein protein MPP10 OS=Homo sapiens GN=MPHOSPH10 PE=1 SV=2	0.999035	32.2588	0.000408651	71.969	55.567	3	S	SKSDLRKSPVFSDEDSDLDFDISKLEQQSKV	X;X;Phospho (STY);X;X;X;X;Phospho (STY);X;X;X;Phospho (STY);X;X;X;Phospho (STY);X;X;X;X;X;X;X;X;X;X;X;X;X;X;X	XXPPPPPPPPPPPPPPPPPPPPPPXXXXXXX	S(0.341)DLRKS(0.76)PVFS(0.898)DEDS(0.999)DLDFDIS(0.001)K	S(-4.39)DLRKS(4.39)PVFS(8.12)DEDS(32.26)DLDFDIS(-32.51)K	14	3	0.83212															1.0636		0.57668	0.53808	0.54908		0.51965	0.53015	0.54121	0.53434		0.32434	0.43858	0.39405
O00567	519	O00567	O00567	Nucleolar protein 56	NOP56	>sp|O00567|NOP56_HUMAN Nucleolar protein 56 OS=Homo sapiens GN=NOP56 PE=1 SV=4	1	67.787	7.91407e-67	234.04	189.98	1;2;3	S	SKPKKKKSFSKEELMSSDLEETAGSTSIPKR	Phospho (STY);X;X;X;X;X;X;Phospho (STY);X;Phospho (STY);X;X;X;X;Oxidation (M);Phospho (STY);Phospho (STY);X;X;X;X;Phospho (STY);X;X;X;X;X;X;X;X;X	XXXXXXXPPPPPPPPPPPPPPPPPPPPPPPX	EELMS(1)S(1)DLEETAGSTSIPK	EELMS(67.79)S(60.18)DLEET(-60.18)AGS(-87.98)T(-106.43)S(-119.27)IPK	5	3	-0.83749	0.85226	0.88626	0.50558	1.214	0.69783	0.91395	0.95571	0.88595	0.6478	0.92938	0.77256	0.8697	0.84745	0.74997	0.65661	0.88967	0.74637	0.41086	0.47983	0.62991	0.75517	0.80719	0.70652	0.56396	0.8507	0.25613	0.9331	0.36004
O00567	520	O00567	O00567	Nucleolar protein 56	NOP56	>sp|O00567|NOP56_HUMAN Nucleolar protein 56 OS=Homo sapiens GN=NOP56 PE=1 SV=4	1	65.8566	7.21146e-143	293.76	263.68	1;2;3	S	KPKKKKSFSKEELMSSDLEETAGSTSIPKRK	X;X;X;X;X;X;X;X;Phospho (STY);X;X;X;X;Oxidation (M);Phospho (STY);Phospho (STY);X;X;X;X;X;X;X;X;X;X;X;X;X;X;X	XXXXXXPPPPPPPPPPPPPPPPPPPPPPPXX	EELMS(1)S(1)DLEETAGSTSIPK	EELMS(61.16)S(65.86)DLEET(-61.16)AGS(-87.49)T(-90.23)S(-97.66)IPK	6	2	0.32167	0.93092	0.87189	0.49094	1.2917	0.78128	0.95911	1.364	1.0337	0.9291	0.98177	1.0341	0.63318	0.9888	1.0254	0.77556	1.6344	0.89302	0.6518	0.97184	0.68654	1.1332	0.86737	0.80912	0.62196	0.77094	0.40739	1.1248	0.38333
O00567	554	O00567	O00567	Nucleolar protein 56	NOP56	>sp|O00567|NOP56_HUMAN Nucleolar protein 56 OS=Homo sapiens GN=NOP56 PE=1 SV=4	1	130.121	7.44545e-09	399.57	349.45	1;2	S	PKEETVNDPEEAGHRSGSKKKRKFSKEEPVS	X;X;X;X;Phospho (STY);X;X;X;X;X;X;X;X;X;X;Phospho (STY);X;Phospho (STY);X;X;X;X;X;X;X;X;X;X;X;X;X	PPPPPPPPPPPPPPPPPPPXXXXXXXXXXXX	EETVNDPEEAGHRS(1)GS(1)K	EET(-130.12)VNDPEEAGHRS(130.12)GS(135.1)K	14	3	0.34713		0.73973	0.60288	0.44514	0.82303	0.58229	0.37163	0.39067	0.10654	0.19976					0.7499	0.66182	0.53556	0.41838	0.51417	0.36173	0.33737	0.38936	0.36835	0.32438	0.32619	0.15923	0.075693	0.034171
O00567	556	O00567	O00567	Nucleolar protein 56	NOP56	>sp|O00567|NOP56_HUMAN Nucleolar protein 56 OS=Homo sapiens GN=NOP56 PE=1 SV=4	1	135.098	0.000232402	255.39	207.68	1;2	S	EETVNDPEEAGHRSGSKKKRKFSKEEPVSSG	X;X;X;X;X;X;X;X;X;X;X;X;X;Phospho (STY);X;Phospho (STY);X;X;X;X;X;X;X;X;X;X;X;X;X;X;X	PPPPPPPPPPPPPPPPPXXXXXXXXXXXXXX	EETVNDPEEAGHRS(1)GS(1)K	EET(-130.12)VNDPEEAGHRS(130.12)GS(135.1)K	16	3	0.34713															1.1253			0.41838
O00567	537	O00567	O00567	Nucleolar protein 56	NOP56	>sp|O00567|NOP56_HUMAN Nucleolar protein 56 OS=Homo sapiens GN=NOP56 PE=1 SV=4	0.960064	13.8094	0.000140264	268.93	226.3	1;2	S	LEETAGSTSIPKRKKSTPKEETVNDPEEAGH	X;X;X;Phospho (STY);X;X;Phospho (STY);X;X;X;X;X;X;X;X;Phospho (STY);X;X;X;X;X;X;X;X;X;X;X;X;X;X;X	XXXXXXXXXXXXXXPPPPPPPPPPPPPPPPP	S(0.96)T(0.04)PKEETVNDPEEAGHR	S(13.81)T(-13.81)PKEET(-86.16)VNDPEEAGHR	1	3	-0.36463		0.61075	0.61746			1.3876	2.0213			2.4904		1.4664			0.82349	1.2013	1.0107	1.0683	1.0758	1.3915	1.4896	0.34493		1.4124	1.8753	0.13353	1.6354	1.6417
O00567	500	O00567	O00567	Nucleolar protein 56	NOP56	>sp|O00567|NOP56_HUMAN Nucleolar protein 56 OS=Homo sapiens GN=NOP56 PE=1 SV=4	0.66859	4.40374	1.13358e-05	95.988	79.972	1	S	QKPQEVPQENGMEDPSISFSKPKKKKSFSKE	X;X;X;X;X;X;X;X;X;X;X;X;X;X;X;Phospho (STY);X;X;X;X;X;X;X;X;X;X;Phospho (STY);X;Phospho (STY);X;X	PPPPPPPPPPPPPPPPPPPPPXXXXXXXXXX	QKPQEVPQENGMEDPS(0.669)IS(0.243)FS(0.089)K	QKPQEVPQENGMEDPS(4.4)IS(-4.4)FS(-8.76)K	16	3	-0.22543				0.66956
O00567	502	O00567	O00567	Nucleolar protein 56	NOP56	>sp|O00567|NOP56_HUMAN Nucleolar protein 56 OS=Homo sapiens GN=NOP56 PE=1 SV=4	0.940804	12.8134	1.08615e-15	143.36	108.22	1	S	PQEVPQENGMEDPSISFSKPKKKKSFSKEEL	X;X;X;X;X;X;X;X;X;X;X;X;X;X;X;Phospho (STY);X;X;X;X;X;X;X;X;Phospho (STY);X;Phospho (STY);X;X;X;X	PPPPPPPPPPPPPPPPPPPXXXXXXXXXXXX	QKPQEVPQENGMEDPS(0.01)IS(0.941)FS(0.049)K	QKPQEVPQENGMEDPS(-19.75)IS(12.81)FS(-12.81)K	18	3	-0.39797																		0.45479	0.63513	0.56492			0.38861	0.345
O00567	504	O00567	O00567	Nucleolar protein 56	NOP56	>sp|O00567|NOP56_HUMAN Nucleolar protein 56 OS=Homo sapiens GN=NOP56 PE=1 SV=4	0.941674	13.5623	2.92523e-11	133.35	95.218	1	S	EVPQENGMEDPSISFSKPKKKKSFSKEELMS	X;X;X;X;X;X;X;X;X;X;X;X;X;X;X;Phospho (STY);X;X;X;X;X;X;Phospho (STY);X;Phospho (STY);X;X;X;X;Oxidation (M);Phospho (STY)	PPPPPPPPPPPPPPPPPXXXXXXXXXXXXXX	QKPQEVPQENGMEDPS(0.017)IS(0.041)FS(0.942)K	QKPQEVPQENGMEDPS(-17.47)IS(-13.56)FS(13.56)K	20	3	-0.14146	0.98552				0.63025										0.9221	0.77717											0.26522
O00571;O00571-2	605;589	O00571	O00571	ATP-dependent RNA helicase DDX3X	DDX3X	>sp|O00571|DDX3X_HUMAN ATP-dependent RNA helicase DDX3X OS=Homo sapiens GN=DDX3X PE=1 SV=3;>sp|O00571-2|DDX3X_HUMAN Isoform 2 of ATP-dependent RNA helicase DDX3X OS=Homo sapiens GN=DDX3X	0.999998	57.6595	1.02142e-05	302.2	264.6	1	S	SSRFSGGFGARDYRQSSGASSSSFSSSRASS	X;Phospho (STY);X;X;Phospho (STY);X;X;X;X;X;X;X;X;X;X;Phospho (STY);X;X;X;X;X;X;X;X;X;X;X;X;X;X;X	XXXXXXXXXXXPPPPPPPPPPPPPPPPPXXX	DYRQS(1)SGASSSSFSSSR	DY(-100.47)RQS(57.66)S(-57.66)GAS(-111.74)S(-130.91)S(-158.21)S(-190.55)FS(-229.31)S(-253.79)S(-262.32)R	5	3	-1.5259																		0.35004	0.39197
O00571;O00571-2	609;593	O00571	O00571	ATP-dependent RNA helicase DDX3X	DDX3X	>sp|O00571|DDX3X_HUMAN ATP-dependent RNA helicase DDX3X OS=Homo sapiens GN=DDX3X PE=1 SV=3;>sp|O00571-2|DDX3X_HUMAN Isoform 2 of ATP-dependent RNA helicase DDX3X OS=Homo sapiens GN=DDX3X	0.352998	0	0.00122682	97.631	58.114		S	SGGFGARDYRQSSGASSSSFSSSRASSSRSG	Phospho (STY);X;X;X;X;X;X;X;X;X;X;X;X;X;X;Phospho (STY);X;X;X;X;X;X;X;X;X;X;X;X;X;X;X	XXXXXXXPPPPPPPPPPPPPPPPPXXXXXXX	DYRQS(0.183)S(0.051)GAS(0.353)S(0.353)S(0.051)S(0.008)FSSSR	DY(-34.83)RQS(-2.85)S(-8.37)GAS(0)S(0)S(-8.37)S(-16.45)FS(-52.09)S(-63.95)S(-74.1)R	9	3	-0.04038
O00571;O00571-2	610;594	O00571	O00571	ATP-dependent RNA helicase DDX3X	DDX3X	>sp|O00571|DDX3X_HUMAN ATP-dependent RNA helicase DDX3X OS=Homo sapiens GN=DDX3X PE=1 SV=3;>sp|O00571-2|DDX3X_HUMAN Isoform 2 of ATP-dependent RNA helicase DDX3X OS=Homo sapiens GN=DDX3X	0.352998	0	0.00122682	97.631	58.114		S	GGFGARDYRQSSGASSSSFSSSRASSSRSGG	X;X;X;X;X;X;X;X;X;X;X;X;X;X;X;X;X;X;X;X;X;X;X;X;X;X;X;X;X;X;X	XXXXXXXXXXXXXXXXXXXXXXXXXXXXXXX	DYRQS(0.183)S(0.051)GAS(0.353)S(0.353)S(0.051)S(0.008)FSSSR	DY(-34.83)RQS(-2.85)S(-8.37)GAS(0)S(0)S(-8.37)S(-16.45)FS(-52.09)S(-63.95)S(-74.1)R	10	3	-0.04038
O00571;O00571-2;O15523;O15523-2	594;578;592;589	O00571	O00571	ATP-dependent RNA helicase DDX3X;ATP-dependent RNA helicase DDX3Y	DDX3X;DDX3Y	>sp|O00571|DDX3X_HUMAN ATP-dependent RNA helicase DDX3X OS=Homo sapiens GN=DDX3X PE=1 SV=3;>sp|O00571-2|DDX3X_HUMAN Isoform 2 of ATP-dependent RNA helicase DDX3X OS=Homo sapiens GN=DDX3X;>sp|O15523|DDX3Y_HUMAN ATP-dependent RNA helicase DDX3Y OS=Homo sapie	1	103.977	3.34145e-07	284.1	213.37	1	S	HYKGSSRGRSKSSRFSGGFGARDYRQSSGAS	X;X;X;X;X;X;X;X;X;X;X;X;X;X;X;Phospho (STY);X;X;X;X;X;X;X;Phospho (STY);X;X;Phospho (STY);X;X;X;Phospho (STY)	XXXXXXXXXXXPPPPPPPPPPPXXXXXXXXX	SSRFS(1)GGFGAR	S(-135.24)S(-103.98)RFS(103.98)GGFGAR	5	3	-0.10999		0.66383													0.63566	0.91098		1.1128				1.272	0.58018	0.47116	0.59181		0.28481
O00571;O00571-2	90;74	O00571	O00571	ATP-dependent RNA helicase DDX3X	DDX3X	>sp|O00571|DDX3X_HUMAN ATP-dependent RNA helicase DDX3X OS=Homo sapiens GN=DDX3X PE=1 SV=3;>sp|O00571-2|DDX3X_HUMAN Isoform 2 of ATP-dependent RNA helicase DDX3X OS=Homo sapiens GN=DDX3X	1	83.1505	1.95491e-06	275	197.08	1	S	RSDSRGKSSFFSDRGSGSRGRFDDRGRSDYD	X;X;X;X;X;X;X;X;X;X;X;X;X;X;X;Phospho (STY);X;X;X;X;X;X;X;X;X;X;X;X;X;X;X	XXXXXXXPPPPPPPPPPPPXXXXXXXXXXXX	SSFFSDRGS(1)GSR	S(-219.14)S(-201.73)FFS(-138.19)DRGS(83.15)GS(-83.15)R	9	3	-0.014354	0.94802	0.56746	0.3669		0.48365	0.57148	0.40622								0.86279	0.71512	0.64653	0.56219	0.49146	0.51139	0.42511	0.46888	0.41451	0.30659	0.24395
O00592;O00592-2	519;487	O00592	O00592	Podocalyxin	PODXL	>sp|O00592|PODXL_HUMAN Podocalyxin OS=Homo sapiens GN=PODXL PE=1 SV=2;>sp|O00592-2|PODXL_HUMAN Isoform 2 of Podocalyxin OS=Homo sapiens GN=PODXL	0.869156	11.2339	4.02229e-17	116.16	100.75	1	S	ENGYHDNPTLEVMETSSEMQEKKVVSLNGEL	X;X;X;X;X;X;X;X;X;X;X;X;Oxidation (M);X;X;Phospho (STY);X;X;X;X;X;X;X;X;X;X;X;X;X;X;X	PPPPPPPPPPPPPPPPPPPPPPXXXXXXXXX	LTEELQTVENGYHDNPTLEVMET(0.065)S(0.869)S(0.065)EMQEK	LT(-62.9)EELQT(-59.69)VENGY(-61.31)HDNPT(-54.29)LEVMET(-11.23)S(11.23)S(-11.23)EMQEK	24	4	1.0079
O00592;O00592-2	520;488	O00592	O00592	Podocalyxin	PODXL	>sp|O00592|PODXL_HUMAN Podocalyxin OS=Homo sapiens GN=PODXL PE=1 SV=2;>sp|O00592-2|PODXL_HUMAN Isoform 2 of Podocalyxin OS=Homo sapiens GN=PODXL	0.52461	1.06021	0.000323997	50.029	36.495	1	S	NGYHDNPTLEVMETSSEMQEKKVVSLNGELG	X;X;X;X;X;X;X;X;X;X;X;X;X;X;X;Phospho (STY);X;X;X;X;X;X;X;X;X;X;X;X;X;X;X	PPPPPPPPPPPPPPPPPPPPPXXXXXXXXXX	LTEELQTVENGYHDNPTLEVMET(0.064)S(0.411)S(0.525)EMQEK	LT(-41.99)EELQT(-41.99)VENGY(-42.08)HDNPT(-33.72)LEVMET(-9.13)S(-1.06)S(1.06)EMQEK	25	4	-0.5188
O00629	60	O00629	O00629	Importin subunit alpha-3	KPNA4	>sp|O00629|IMA3_HUMAN Importin subunit alpha-3 OS=Homo sapiens GN=KPNA4 PE=1 SV=1	1	101.908	4.74404e-23	158.91	133.89	1	S	LLKRRNVPHEDICEDSDIDGDYRVQNTSLEA	X;X;X;X;X;X;X;X;X;X;X;X;X;X;X;Phospho (STY);X;X;X;X;X;X;X;X;X;X;X;X;X;X;X	XXXXXPPPPPPPPPPPPPPPPPPXXXXXXXX	NVPHEDICEDS(1)DIDGDYR	NVPHEDICEDS(101.91)DIDGDY(-101.91)R	11	2	0.21844	0.8392	0.54739	0.44363	0.66493	0.70013	0.77504	0.48373	0.7817	0.57996	0.71336		0.3435	0.37482	0.48835	0.9844	1.3154	1.3026	1.0703	0.87039	1.0545	1.0635	1.0378	1.0772	1.0428	1.4506		0.58286
O00712;O00712-6;O00712-4;O00712-5	264;12;315;264	O00712	O00712	Nuclear factor 1 B-type	NFIB	>sp|O00712|NFIB_HUMAN Nuclear factor 1 B-type OS=Homo sapiens GN=NFIB PE=1 SV=2;>sp|O00712-6|NFIB_HUMAN Isoform 6 of Nuclear factor 1 B-type OS=Homo sapiens GN=NFIB;>sp|O00712-4|NFIB_HUMAN Isoform 4 of Nuclear factor 1 B-type OS=Homo sapiens GN=NFIB;>sp|O0	0.937415	11.8851	0.00362523	73.951	27.561	1	S	YYHDMNSGVNLQRSLSSPPSSKRPKTISIDE	X;X;X;X;X;X;X;X;X;X;X;X;X;X;X;Phospho (STY);X;X;X;X;X;X;X;X;X;X;X;X;X;X;X	XXXXXXXXXXXXXPPPPPPPPPXXXXXXXXX	SLS(0.937)S(0.061)PPS(0.001)S(0.001)K	S(-46.27)LS(11.89)S(-11.89)PPS(-30.1)S(-30.1)K	3	2	-0.056123																									1.0343	1.3153
O00712;O00712-6;O00712-4;O00712-5	311;59;362;311	O00712	O00712	Nuclear factor 1 B-type	NFIB	>sp|O00712|NFIB_HUMAN Nuclear factor 1 B-type OS=Homo sapiens GN=NFIB PE=1 SV=2;>sp|O00712-6|NFIB_HUMAN Isoform 6 of Nuclear factor 1 B-type OS=Homo sapiens GN=NFIB;>sp|O00712-4|NFIB_HUMAN Isoform 4 of Nuclear factor 1 B-type OS=Homo sapiens GN=NFIB;>sp|O0	0.997304	25.7005	0.0010764	218.34	187.77	1	S	PAAGSRTWHERDQDMSSPTTMKKPEKPLFSS	X;X;X;X;X;X;X;X;X;X;X;X;X;X;X;Phospho (STY);X;X;X;X;Oxidation (M);X;X;X;X;X;X;X;X;X;X	XXXXXXPPPPPPPPPPPPPPPPXXXXXXXXX	TWHERDQDMS(0.997)S(0.003)PTTMK	T(-171.98)WHERDQDMS(25.7)S(-25.7)PT(-49.51)T(-62.18)MK	10	3	-0.29994
O00712;O00712-6;O00712-4;O00712-5	312;60;363;312	O00712	O00712	Nuclear factor 1 B-type	NFIB	>sp|O00712|NFIB_HUMAN Nuclear factor 1 B-type OS=Homo sapiens GN=NFIB PE=1 SV=2;>sp|O00712-6|NFIB_HUMAN Isoform 6 of Nuclear factor 1 B-type OS=Homo sapiens GN=NFIB;>sp|O00712-4|NFIB_HUMAN Isoform 4 of Nuclear factor 1 B-type OS=Homo sapiens GN=NFIB;>sp|O0	0.999199	33.9816	0.000742357	282.09	222.72	1	S	AAGSRTWHERDQDMSSPTTMKKPEKPLFSSA	X;X;X;X;X;X;X;X;X;X;X;X;X;X;X;Phospho (STY);X;X;X;Oxidation (M);X;X;X;X;X;X;X;X;X;X;X	XXXXXPPPPPPPPPPPPPPPPXXXXXXXXXX	TWHERDQDMSS(0.999)PTTMK	T(-135.89)WHERDQDMS(-33.98)S(33.98)PT(-33.98)T(-57.32)MK	11	3	-0.36327	1.0842	1.4429		2.3457
O00764;O00764-3;O00764-2	261;188;233	O00764	O00764	Pyridoxal kinase	PDXK	>sp|O00764|PDXK_HUMAN Pyridoxal kinase OS=Homo sapiens GN=PDXK PE=1 SV=1;>sp|O00764-3|PDXK_HUMAN Isoform 3 of Pyridoxal kinase OS=Homo sapiens GN=PDXK;>sp|O00764-2|PDXK_HUMAN Isoform 2 of Pyridoxal kinase OS=Homo sapiens GN=PDXK	0.99993	41.6	0.000534361	191.63	131.32	1	S	HKHPNNLKVACEKTVSTLHHVLQRTIQCAKA	X;X;X;X;X;X;X;X;X;X;X;X;X;X;X;Phospho (STY);X;X;X;X;X;X;X;X;X;X;X;X;X;X;X	XXXXXXXXXXXXXPPPPPPPPPPPXXXXXXX	TVS(1)TLHHVLQR	T(-59.01)VS(41.6)T(-41.6)LHHVLQR	3	3	0.010924
O00767	203	O00767	O00767	Acyl-CoA desaturase	SCD	>sp|O00767|ACOD_HUMAN Acyl-CoA desaturase OS=Homo sapiens GN=SCD PE=1 SV=2	1	83.4924	2.72569e-05	129.11	76.938	1	S	RKHPAVKEKGSTLDLSDLEAEKLVMFQRRYY	X;X;X;X;X;X;X;X;X;X;X;X;X;X;X;Phospho (STY);X;X;X;X;X;X;X;X;X;X;X;X;X;X;X	XXXXXXXXXPPPPPPPPPPPPPXXXXXXXXX	GSTLDLS(1)DLEAEK	GS(-84.11)T(-83.49)LDLS(83.49)DLEAEK	7	2	-0.91399
O14497;O14497-2	301;301	O14497	O14497	AT-rich interactive domain-containing protein 1A	ARID1A	>sp|O14497|ARI1A_HUMAN AT-rich interactive domain-containing protein 1A OS=Homo sapiens GN=ARID1A PE=1 SV=3;>sp|O14497-2|ARI1A_HUMAN Isoform 2 of AT-rich interactive domain-containing protein 1A OS=Homo sapiens GN=ARID1A	0.343917	0	0.00156774	41.935	29.935		S	TPQPTATPTLNQLLTSPSSARGYQGYPGGDY	X;X;X;X;X;X;X;X;X;X;X;X;X;X;X;X;X;X;X;X;X;X;X;X;X;X;X;X;X;X;X	XXXXXXXXXXXXXXXXXXXXXXXXXXXXXXX	FGAMGGGGPSAAGGGT(0.001)PQPT(0.001)AT(0.002)PT(0.065)LNQLLT(0.344)S(0.344)PS(0.121)S(0.121)AR	FGAMGGGGPS(-33.85)AAGGGT(-26.83)PQPT(-27.3)AT(-21.41)PT(-7.22)LNQLLT(0)S(0)PS(-4.52)S(-4.52)AR	31	3	0.12262
O14497;O14497-2;O14497-3	764;764;381	O14497	O14497	AT-rich interactive domain-containing protein 1A	ARID1A	>sp|O14497|ARI1A_HUMAN AT-rich interactive domain-containing protein 1A OS=Homo sapiens GN=ARID1A PE=1 SV=3;>sp|O14497-2|ARI1A_HUMAN Isoform 2 of AT-rich interactive domain-containing protein 1A OS=Homo sapiens GN=ARID1A;>sp|O14497-3|ARI1A_HUMAN Isoform 3	0.999413	32.3778	2.67559e-05	202.16	160.13	2	S	DRGYMQRNPQMPQYSSPQPGSALSPRQPSGG	X;X;X;X;X;X;X;X;X;X;X;X;X;X;X;Phospho (STY);X;X;X;X;X;X;X;Phospho (STY);X;X;X;X;X;X;X	XXXXXXXPPPPPPPPPPPPPPPPPPPXXXXX	NPQMPQYS(0.001)S(0.999)PQPGSALS(1)PR	NPQMPQY(-50.89)S(-32.38)S(32.38)PQPGS(-61.93)ALS(80.03)PR	9	3	0.11826					0.83666	0.65629		0.65313						0.23726	0.77781	0.72609	0.73192	0.57755		0.54847	0.59561	0.60746	0.59926	0.47244
O14497;O14497-2;O14497-3	772;772;389	O14497	O14497	AT-rich interactive domain-containing protein 1A	ARID1A	>sp|O14497|ARI1A_HUMAN AT-rich interactive domain-containing protein 1A OS=Homo sapiens GN=ARID1A PE=1 SV=3;>sp|O14497-2|ARI1A_HUMAN Isoform 2 of AT-rich interactive domain-containing protein 1A OS=Homo sapiens GN=ARID1A;>sp|O14497-3|ARI1A_HUMAN Isoform 3	1	84.3667	2.67559e-05	202.16	160.13	2	S	PQMPQYSSPQPGSALSPRQPSGGQIHTGMGS	X;X;X;X;X;X;Phospho (STY);Phospho (STY);X;X;X;X;X;X;X;Phospho (STY);X;X;X;X;X;X;X;X;X;X;X;X;X;X;X	PPPPPPPPPPPPPPPPPPXXXXXXXXXXXXX	NPQMPQYS(0.047)S(0.953)PQPGSALS(1)PR	NPQMPQY(-50.18)S(-13.03)S(13.03)PQPGS(-56.93)ALS(84.37)PR	17	3	-0.36914					0.83666	0.65629		0.65313	0.48383					0.23726	0.77781	0.72609	0.73192	0.57755		0.54847	0.59561	0.60746	0.59926	0.47244
O14497;O14497-2	363;363	O14497	O14497	AT-rich interactive domain-containing protein 1A	ARID1A	>sp|O14497|ARI1A_HUMAN AT-rich interactive domain-containing protein 1A OS=Homo sapiens GN=ARID1A PE=1 SV=3;>sp|O14497-2|ARI1A_HUMAN Isoform 2 of AT-rich interactive domain-containing protein 1A OS=Homo sapiens GN=ARID1A	0.888341	9.0176	1.75036e-05	201.48	171.9	1;3	S	AASGGAQQRSHHAPMSPGSSGGGGQPLARTP	X;X;X;X;X;X;X;X;X;X;X;X;X;X;X;Phospho (STY);X;X;X;X;X;X;X;X;X;X;X;X;X;Phospho (STY);X	XXXXXXXXXPPPPPPPPPPPPPPPPPPPPPP	SHHAPMS(0.888)PGS(0.111)SGGGGQPLAR	S(-59.68)HHAPMS(9.02)PGS(-9.02)S(-35.1)GGGGQPLAR	7	3	-0.14539																1.1668	0.97355			1.6103	0.64557			1.6036		2.5997
O14497;O14497-2	366;366	O14497	O14497	AT-rich interactive domain-containing protein 1A	ARID1A	>sp|O14497|ARI1A_HUMAN AT-rich interactive domain-containing protein 1A OS=Homo sapiens GN=ARID1A PE=1 SV=3;>sp|O14497-2|ARI1A_HUMAN Isoform 2 of AT-rich interactive domain-containing protein 1A OS=Homo sapiens GN=ARID1A	0.675867	4.95914	9.20746e-05	112.44	70.372	3	S	GGAQQRSHHAPMSPGSSGGGGQPLARTPQPS	X;X;X;X;X;X;X;X;X;X;X;X;X;X;X;Phospho (STY);X;X;X;X;X;X;X;X;X;X;Phospho (STY);X;X;X;Phospho (STY)	XXXXXXPPPPPPPPPPPPPPPPPPPPPPPPP	SHHAPMS(0.216)PGS(0.676)S(0.108)GGGGQPLAR	S(-35.49)HHAPMS(-4.96)PGS(4.96)S(-7.96)GGGGQPLAR	10	3	-0.47515																		1.0915					0.39185
O14497;O14497-2	381;381	O14497	O14497	AT-rich interactive domain-containing protein 1A	ARID1A	>sp|O14497|ARI1A_HUMAN AT-rich interactive domain-containing protein 1A OS=Homo sapiens GN=ARID1A PE=1 SV=3;>sp|O14497-2|ARI1A_HUMAN Isoform 2 of AT-rich interactive domain-containing protein 1A OS=Homo sapiens GN=ARID1A	0.750687	4.8091	1.75036e-05	71.781	48.934	1;3	S	SSGGGGQPLARTPQPSSPMDQMGKMRPQPYG	Phospho (STY);X;X;X;X;X;X;X;X;X;X;Phospho (STY);X;X;X;Phospho (STY);X;X;X;X;X;X;X;X;X;X;X;X;X;X;X	PPPPPPPPPPPPPPPPPPPPPPPPXXXXXXX	T(0.001)PQPS(0.751)S(0.248)PMDQMGK	T(-27.76)PQPS(4.81)S(-4.81)PMDQMGK	5	2	0.069986																0.97675			0.85425	0.70946	0.64557		0.39185	0.45464
O14497;O14497-2	382;382	O14497	O14497	AT-rich interactive domain-containing protein 1A	ARID1A	>sp|O14497|ARI1A_HUMAN AT-rich interactive domain-containing protein 1A OS=Homo sapiens GN=ARID1A PE=1 SV=3;>sp|O14497-2|ARI1A_HUMAN Isoform 2 of AT-rich interactive domain-containing protein 1A OS=Homo sapiens GN=ARID1A	0.563053	0	9.20746e-05	71.781	48.934	1;3	S	SGGGGQPLARTPQPSSPMDQMGKMRPQPYGG	X;X;X;X;X;X;X;X;X;X;X;X;X;X;X;X;X;X;X;X;X;X;X;X;X;X;X;X;X;X;X	XXXXXXXXXXXXXXXXXXXXXXXXXXXXXXX	S(0.085)HHAPMS(0.399)PGS(0.399)S(0.121)GGGGQPLART(0.831)PQPS(0.603)S(0.563)PMDQMGK	S(-4.55)HHAPMS(0)PGS(0)S(-5.28)GGGGQPLART(3.8)PQPS(0)S(0)PMDQMGK	26	4	-0.13031																								0.45464
O14497;O14497-2;O14497-3	1182;1182;799	O14497	O14497	AT-rich interactive domain-containing protein 1A	ARID1A	>sp|O14497|ARI1A_HUMAN AT-rich interactive domain-containing protein 1A OS=Homo sapiens GN=ARID1A PE=1 SV=3;>sp|O14497-2|ARI1A_HUMAN Isoform 2 of AT-rich interactive domain-containing protein 1A OS=Homo sapiens GN=ARID1A;>sp|O14497-3|ARI1A_HUMAN Isoform 3	0.738442	4.50821	0.0042593	50.858	15.74	1	S	STPHSQIPPLPGMSRSNSVGIQDAFNDGSDS	X;X;X;X;X;X;X;X;X;X;X;X;X;X;X;Phospho (STY);X;X;X;X;X;X;X;X;X;X;X;X;X;X;X	XXXXXXXXXXXXXXXPPPPPPPPPPPPPPPP	S(0.738)NS(0.262)VGIQDAFNDGSDSTFQK	S(4.51)NS(-4.51)VGIQDAFNDGS(-46.17)DS(-47.65)T(-47.65)FQK	1	3	-0.42942															0.57022	1.0249
O14519	24	O14519	O14519	Cyclin-dependent kinase 2-associated protein 1	CDK2AP1	>sp|O14519|CDKA1_HUMAN Cyclin-dependent kinase 2-associated protein 1 OS=Homo sapiens GN=CDK2AP1 PE=1 SV=1	0.699878	12.2331	5.12831e-06	64.594	49.284	1	S	AHMPAAALNAAGSVHSPSTSMATSSQYRQLL	X;X;X;X;X;X;X;X;X;X;X;X;X;X;X;Phospho (STY);X;X;X;X;Oxidation (M);X;X;X;X;X;X;X;X;X;X	PPPPPPPPPPPPPPPPPPPPPPPPPPPPXXX	SYKPNLAAHMPAAALNAAGS(0.011)VHS(0.7)PS(0.042)T(0.042)S(0.042)MAT(0.042)S(0.042)S(0.042)QY(0.038)R	S(-52.63)Y(-52.65)KPNLAAHMPAAALNAAGS(-18.21)VHS(12.23)PS(-12.23)T(-12.23)S(-12.23)MAT(-12.23)S(-12.23)S(-12.23)QY(-12.6)R	23	4	1.5572
O14519	26	O14519	O14519	Cyclin-dependent kinase 2-associated protein 1	CDK2AP1	>sp|O14519|CDKA1_HUMAN Cyclin-dependent kinase 2-associated protein 1 OS=Homo sapiens GN=CDK2AP1 PE=1 SV=1	0.247423	0	1.73364e-06	70.57	54.105		S	MPAAALNAAGSVHSPSTSMATSSQYRQLLSD	X;X;X;X;X;X;X;X;X;X;X;X;X;X;X;Phospho (STY);X;X;X;X;X;X;X;X;X;X;X;X;X;X;X	PPPPPPPPPPPPPPPPPPPPPPPPPPXXXXX	SYKPNLAAHMPAAALNAAGS(0.004)VHS(0.193)PS(0.247)T(0.247)S(0.073)MAT(0.073)S(0.073)S(0.073)QY(0.017)R	S(-69.56)Y(-69.59)KPNLAAHMPAAALNAAGS(-17.48)VHS(-1.08)PS(0)T(0)S(-5.33)MAT(-5.33)S(-5.33)S(-5.33)QY(-11.52)R	25	4	0.94944
O14519	28	O14519	O14519	Cyclin-dependent kinase 2-associated protein 1	CDK2AP1	>sp|O14519|CDKA1_HUMAN Cyclin-dependent kinase 2-associated protein 1 OS=Homo sapiens GN=CDK2AP1 PE=1 SV=1	0.3179	4.14077	6.75593e-06	62.706	44.179		S	AAALNAAGSVHSPSTSMATSSQYRQLLSDYG	X;X;X;X;X;X;X;X;X;X;X;X;X;X;X;Phospho (STY);X;X;X;X;X;X;X;X;X;X;X;X;X;X;X	PPPPPPPPPPPPPPPPPPPPPPPPXXXXXXX	SYKPNLAAHMPAAALNAAGS(0.006)VHS(0.064)PS(0.079)T(0.079)S(0.318)MAT(0.098)S(0.123)S(0.123)QY(0.11)R	S(-58.04)Y(-58.12)KPNLAAHMPAAALNAAGS(-17.36)VHS(-6.94)PS(-6.03)T(-6.03)S(4.14)MAT(-5.09)S(-4.14)S(-4.14)QY(-4.62)R	27	4	1.0382
O14519	32	O14519	O14519	Cyclin-dependent kinase 2-associated protein 1	CDK2AP1	>sp|O14519|CDKA1_HUMAN Cyclin-dependent kinase 2-associated protein 1 OS=Homo sapiens GN=CDK2AP1 PE=1 SV=1	0.203252	0	0.000104842	54.466	39.612		S	NAAGSVHSPSTSMATSSQYRQLLSDYGPPSL	X;X;X;X;X;X;X;X;X;X;X;X;X;X;X;X;X;X;X;X;X;X;X;X;X;X;X;X;X;X;X	XXXXXXXXXXXXXXXXXXXXXXXXXXXXXXX	SYKPNLAAHMPAAALNAAGS(0.004)VHS(0.044)PS(0.053)T(0.053)S(0.053)MAT(0.203)S(0.203)S(0.203)QY(0.183)R	S(-53.61)Y(-53.64)KPNLAAHMPAAALNAAGS(-17.33)VHS(-6.66)PS(-5.81)T(-5.81)S(-5.81)MAT(0)S(0)S(0)QY(-0.46)R	31	4	0.77652
O14519	33	O14519	O14519	Cyclin-dependent kinase 2-associated protein 1	CDK2AP1	>sp|O14519|CDKA1_HUMAN Cyclin-dependent kinase 2-associated protein 1 OS=Homo sapiens GN=CDK2AP1 PE=1 SV=1	0.370249	0.410868	0.000104842	54.466	39.612		S	AAGSVHSPSTSMATSSQYRQLLSDYGPPSLG	X;X;X;X;X;X;X;X;X;X;X;X;X;X;X;Phospho (STY);X;X;X;X;X;X;X;X;X;X;X;X;X;X;X	PPPPPPPPPPPPPPPPPPPXXXXXXXXXXXX	SYKPNLAAHMPAAALNAAGS(0.004)VHS(0.034)PS(0.013)T(0.013)S(0.034)MAT(0.089)S(0.106)S(0.37)QY(0.337)R	S(-44.93)Y(-44.97)KPNLAAHMPAAALNAAGS(-20)VHS(-10.39)PS(-14.61)T(-14.61)S(-10.39)MAT(-6.17)S(-5.42)S(0.41)QY(-0.41)R	32	4	1.1205
O14523;O14523-2	374;374	O14523	O14523	C2 domain-containing protein 2-like	C2CD2L	>sp|O14523|C2C2L_HUMAN C2 domain-containing protein 2-like OS=Homo sapiens GN=C2CD2L PE=1 SV=3;>sp|O14523-2|C2C2L_HUMAN Isoform 2 of C2 domain-containing protein 2-like OS=Homo sapiens GN=C2CD2L	0.973645	16.5298	4.2287e-10	95.122	65.966	1	S	CGDTELLGQATLPVGSPSRPLSRRQLCPLTP	X;X;X;X;X;X;X;X;X;X;X;X;X;X;X;Phospho (STY);X;X;X;X;X;X;X;X;X;X;X;X;X;X;X	PPPPPPPPPPPPPPPPPPPPPPPXXXXXXXX	SSSCGDTELLGQATLPVGS(0.974)PS(0.022)RPLS(0.005)R	S(-76.82)S(-76.82)S(-74.61)CGDT(-69.9)ELLGQAT(-50.95)LPVGS(16.53)PS(-16.53)RPLS(-23.16)R	19	3	-0.46189
O14523;O14523-2	376;376	O14523	O14523	C2 domain-containing protein 2-like	C2CD2L	>sp|O14523|C2C2L_HUMAN C2 domain-containing protein 2-like OS=Homo sapiens GN=C2CD2L PE=1 SV=3;>sp|O14523-2|C2C2L_HUMAN Isoform 2 of C2 domain-containing protein 2-like OS=Homo sapiens GN=C2CD2L	0.855068	10.1813	4.58147e-05	67.88	48.493	1	S	DTELLGQATLPVGSPSRPLSRRQLCPLTPGP	X;X;X;X;X;X;X;X;X;X;X;X;X;X;X;Phospho (STY);X;X;X;X;X;X;X;X;X;X;X;X;X;X;X	PPPPPPPPPPPPPPPPPPPPPXXXXXXXXXX	SSSCGDTELLGQATLPVGS(0.062)PS(0.855)RPLS(0.082)R	S(-49.67)S(-49.67)S(-47.25)CGDT(-41.48)ELLGQAT(-32.81)LPVGS(-11.37)PS(10.18)RPLS(-10.18)R	21	3	-0.45974
O14524;O14524-2	368;295	O14524	O14524	Transmembrane protein 194A	TMEM194A	>sp|O14524|NEMP1_HUMAN Nuclear envelope integral membrane protein 1 OS=Homo sapiens GN=NEMP1 PE=1 SV=2;>sp|O14524-2|NEMP1_HUMAN Isoform 2 of Nuclear envelope integral membrane protein 1 OS=Homo sapiens GN=NEMP1	0.999997	55.0397	5.14456e-14	160.43	130.1	1	S	VETRKALEELREFCNSPDCSAWKTVSRIQSP	X;X;X;X;X;X;X;X;X;X;X;X;X;X;X;Phospho (STY);X;X;X;X;X;X;X;X;X;X;X;X;X;X;X	XXXXXPPPPPPPPPPPPPPPPPPXXXXXXXX	EFCNS(1)PDCSAWK	EFCNS(55.04)PDCS(-55.04)AWK	5	2	-0.64612		0.83021	0.53663	2.3582	0.81835	0.94949	2.1352	0.6356	0.59644	0.53416					0.66731	0.75327	0.66134	0.38847	0.67533	0.75503	0.88413	0.72726	0.59544	0.64909	0.79098
O14530	181	O14530	O14530	Thioredoxin domain-containing protein 9	TXNDC9	>sp|O14530|TXND9_HUMAN Thioredoxin domain-containing protein 9 OS=Homo sapiens GN=TXNDC9 PE=1 SV=2	0.497285	0	0.000203866	71.696	45.022		S	NTDDFTTETLEWRLGSSDILNYSGNLMEPPF	X;X;X;X;X;X;X;X;X;X;X;X;X;X;X;Phospho (STY);X;X;X;X;X;X;X;X;X;X;Oxidation (M);X;X;X;X	XXXXXXXXXXXXXPPPPPPPPPPPPPPPPPP	LGS(0.497)S(0.497)DILNY(0.001)S(0.004)GNLMEPPFQNQK	LGS(0)S(0)DILNY(-25.34)S(-20.97)GNLMEPPFQNQK	3	3	-0.32712
O14530	182	O14530	O14530	Thioredoxin domain-containing protein 9	TXNDC9	>sp|O14530|TXND9_HUMAN Thioredoxin domain-containing protein 9 OS=Homo sapiens GN=TXNDC9 PE=1 SV=2	0.612517	5.21058	0.000203866	71.696	45.022	1	S	TDDFTTETLEWRLGSSDILNYSGNLMEPPFQ	X;X;X;X;X;X;X;X;X;X;X;X;X;X;X;Phospho (STY);X;X;X;X;X;X;X;X;X;Oxidation (M);X;X;X;X;X	XXXXXXXXXXXXPPPPPPPPPPPPPPPPPPP	LGS(0.185)S(0.613)DILNY(0.049)S(0.154)GNLMEPPFQNQK	LGS(-5.21)S(5.21)DILNY(-11)S(-5.99)GNLMEPPFQNQK	4	3	0.049147
O14530	188	O14530	O14530	Thioredoxin domain-containing protein 9	TXNDC9	>sp|O14530|TXND9_HUMAN Thioredoxin domain-containing protein 9 OS=Homo sapiens GN=TXNDC9 PE=1 SV=2	0.999998	57.0391	5.04732e-08	126.75	97.667	1	S	ETLEWRLGSSDILNYSGNLMEPPFQNQKKFG	X;X;X;X;X;X;X;X;X;X;X;X;X;X;X;Phospho (STY);X;X;X;Oxidation (M);X;X;X;X;X;X;X;X;X;X;X	XXXXXXPPPPPPPPPPPPPPPPPPPPPPXXX	LGSSDILNYS(1)GNLMEPPFQNQK	LGS(-74.42)S(-74.42)DILNY(-57.04)S(57.04)GNLMEPPFQNQK	10	2	-0.020498		0.51032		0.67747	0.5723	0.77953	0.63598	0.72595		0.85697		0.61097	0.83479	0.78712	0.6624	0.72203	0.6204	0.5319					0.62326		0.76369	0.66112	0.73603
O14545	325	O14545	O14545	TRAF-type zinc finger domain-containing protein 1	TRAFD1	>sp|O14545|TRAD1_HUMAN TRAF-type zinc finger domain-containing protein 1 OS=Homo sapiens GN=TRAFD1 PE=1 SV=1	0.73232	8.65314	8.59887e-06	137.39	94.437	1	S	TSCNPSRALPSLNTGSSSPRGVEEPDVIFQN	X;X;X;X;X;X;X;X;X;X;X;X;X;X;X;Phospho (STY);X;X;X;X;X;X;X;X;X;X;X;X;X;X;X	XXXXXXXPPPPPPPPPPPPPXXXXXXXXXXX	ALPSLNT(0.068)GS(0.732)S(0.1)S(0.1)PR	ALPS(-61.08)LNT(-10.32)GS(8.65)S(-8.65)S(-8.65)PR	9	2	0.10306														0.59708
O14545	326	O14545	O14545	TRAF-type zinc finger domain-containing protein 1	TRAFD1	>sp|O14545|TRAD1_HUMAN TRAF-type zinc finger domain-containing protein 1 OS=Homo sapiens GN=TRAFD1 PE=1 SV=1	0.713515	5.50512	5.43776e-18	173.51	111.35	1	S	SCNPSRALPSLNTGSSSPRGVEEPDVIFQNF	X;X;X;X;X;X;X;X;X;X;X;X;X;X;X;Phospho (STY);X;X;X;X;X;X;X;X;X;X;X;X;X;X;X	XXXXXXPPPPPPPPPPPPPXXXXXXXXXXXX	ALPS(0.011)LNT(0.006)GS(0.068)S(0.714)S(0.201)PR	ALPS(-18.04)LNT(-20.62)GS(-10.19)S(5.51)S(-5.51)PR	10	2	0.18869		0.55195											0.61956								0.55783			0.59587
O14545	327	O14545	O14545	TRAF-type zinc finger domain-containing protein 1	TRAFD1	>sp|O14545|TRAD1_HUMAN TRAF-type zinc finger domain-containing protein 1 OS=Homo sapiens GN=TRAFD1 PE=1 SV=1	0.990717	22.156	2.35454e-28	187.56	132.6	1	S	CNPSRALPSLNTGSSSPRGVEEPDVIFQNFL	X;X;X;X;X;X;X;X;X;X;X;X;X;X;X;Phospho (STY);X;X;X;X;X;X;X;X;X;X;X;X;X;X;X	XXXXXPPPPPPPPPPPPPXXXXXXXXXXXXX	ALPSLNT(0.001)GS(0.002)S(0.006)S(0.991)PR	ALPS(-46.73)LNT(-29.12)GS(-26.91)S(-22.16)S(22.16)PR	11	2	0.14464								0.70233	0.68775	0.65365								0.62893	0.74116	0.63593		0.68259	0.67835		0.64589		0.64012	0.479
O14545	278	O14545	O14545	TRAF-type zinc finger domain-containing protein 1	TRAFD1	>sp|O14545|TRAD1_HUMAN TRAF-type zinc finger domain-containing protein 1 OS=Homo sapiens GN=TRAFD1 PE=1 SV=1	0.999996	54.6939	1.95347e-05	211.83	170.46	1	S	WRAVCEADQSHGGPRSLSDIKGAADEIMLPC	X;X;X;X;X;X;X;X;X;X;X;X;X;X;X;Phospho (STY);X;X;X;X;X;X;X;X;X;X;X;X;X;X;X	XXPPPPPPPPPPPPPPPPPPPXXXXXXXXXX	AVCEADQSHGGPRS(1)LSDIK	AVCEADQS(-63.09)HGGPRS(54.69)LS(-54.69)DIK	14	3	-0.48888															0.62815		0.61355	0.64501	0.72438		0.41749	0.69399		0.27201	0.41794			0.33709
O14545	280	O14545	O14545	TRAF-type zinc finger domain-containing protein 1	TRAFD1	>sp|O14545|TRAD1_HUMAN TRAF-type zinc finger domain-containing protein 1 OS=Homo sapiens GN=TRAFD1 PE=1 SV=1	0.890291	9.18434	0.000243713	105.25	82.701	1	S	AVCEADQSHGGPRSLSDIKGAADEIMLPCEF	X;X;X;X;X;X;X;X;X;X;X;X;X;X;X;Phospho (STY);X;X;X;X;X;X;X;X;X;X;X;X;X;X;X	PPPPPPPPPPPPPPPPPPPXXXXXXXXXXXX	AVCEADQS(0.002)HGGPRS(0.107)LS(0.89)DIK	AVCEADQS(-25.91)HGGPRS(-9.18)LS(9.18)DIK	16	3	-0.17762																							0.41681
O14545	415	O14545	O14545	TRAF-type zinc finger domain-containing protein 1	TRAFD1	>sp|O14545|TRAD1_HUMAN TRAF-type zinc finger domain-containing protein 1 OS=Homo sapiens GN=TRAFD1 PE=1 SV=1	0.998221	27.4912	1.80719e-37	196.88	153.93	1	S	VTEGIPRLDSQPQETSPELPRRRVRHQGDLS	X;X;X;X;X;X;X;X;X;X;X;X;X;X;X;Phospho (STY);X;X;X;X;X;X;X;X;X;X;X;X;X;X;X	XXXXXXXPPPPPPPPPPPPPPPXXXXXXXXX	LDSQPQET(0.002)S(0.998)PELPR	LDS(-81.42)QPQET(-27.49)S(27.49)PELPR	9	3	-0.0030154	0.88022	0.57027	0.36045	0.51159	0.57718	0.70383	0.60226	0.64495	0.66467	0.75605	0.6886	0.5799	0.64275	0.66674	0.7385	0.83522	0.61337	0.66749	0.67267	0.59671	0.56287	0.78647	0.69023	0.5597	0.84234	0.4611	0.79905	0.46427
O14545	468	O14545	O14545	TRAF-type zinc finger domain-containing protein 1	TRAFD1	>sp|O14545|TRAD1_HUMAN TRAF-type zinc finger domain-containing protein 1 OS=Homo sapiens GN=TRAFD1 PE=1 SV=1	0.621962	5.23527	0.00242962	113.37	81.647	2	S	RPINNMTATYNQLSRSTSGPRPGCQPSSPCV	X;X;X;X;X;X;X;X;X;X;X;X;X;X;X;Phospho (STY);X;X;X;X;X;X;X;X;X;X;Phospho (STY);Phospho (STY);X;X;X	XXXXXXXXXXXXXXXPPPPPPPPPPPPPPPP	S(0.622)T(0.195)S(0.183)GPRPGCQPS(0.229)S(0.771)PCVPK	S(5.24)T(-5.96)S(-5.24)GPRPGCQPS(-5.96)S(5.96)PCVPK	1	3	0.34639
O14545	470	O14545	O14545	TRAF-type zinc finger domain-containing protein 1	TRAFD1	>sp|O14545|TRAD1_HUMAN TRAF-type zinc finger domain-containing protein 1 OS=Homo sapiens GN=TRAFD1 PE=1 SV=1	0.753208	4.95097	0.00242962	113.37	81.647	2	S	INNMTATYNQLSRSTSGPRPGCQPSSPCVPK	X;X;X;X;X;X;X;X;X;X;X;X;X;X;X;Phospho (STY);X;X;X;X;X;X;X;X;Phospho (STY);Phospho (STY);X;X;X;X;X	XXXXXXXXXXXXXPPPPPPPPPPPPPPPPPP	S(0.163)T(0.084)S(0.753)GPRPGCQPS(0.461)S(0.539)PCVPK	S(-4.95)T(-9.51)S(4.95)GPRPGCQPS(0)S(0)PCVPK	3	3	-1.095																							0.60282
O14545	479	O14545	O14545	TRAF-type zinc finger domain-containing protein 1	TRAFD1	>sp|O14545|TRAD1_HUMAN TRAF-type zinc finger domain-containing protein 1 OS=Homo sapiens GN=TRAFD1 PE=1 SV=1	0.906477	9.9233	0.00289323	80.69	31.979	1;2	S	QLSRSTSGPRPGCQPSSPCVPKLSNSDSQDI	X;X;X;X;Phospho (STY);X;Phospho (STY);X;X;X;X;X;X;X;X;Phospho (STY);X;X;X;X;X;X;X;X;X;X;X;X;X;X;X	XXXXPPPPPPPPPPPPPPPPPPXXXXXXXXX	S(0.001)T(0.001)SGPRPGCQPS(0.906)S(0.092)PCVPK	S(-32.29)T(-32.29)S(-36.76)GPRPGCQPS(9.92)S(-9.92)PCVPK	12	2	-0.3901	0.8457																									1.8706
O14545	480	O14545	O14545	TRAF-type zinc finger domain-containing protein 1	TRAFD1	>sp|O14545|TRAD1_HUMAN TRAF-type zinc finger domain-containing protein 1 OS=Homo sapiens GN=TRAFD1 PE=1 SV=1	0.999988	49.31	0.000304375	176.85	136.94	1;2	S	LSRSTSGPRPGCQPSSPCVPKLSNSDSQDIQ	X;X;X;Phospho (STY);Phospho (STY);Phospho (STY);X;X;X;X;X;X;X;X;X;Phospho (STY);X;X;X;X;X;X;X;X;X;X;X;X;X;X;X	XXXPPPPPPPPPPPPPPPPPPXXXXXXXXXX	STSGPRPGCQPSS(1)PCVPK	S(-131.99)T(-131.99)S(-131.99)GPRPGCQPS(-49.31)S(49.31)PCVPK	13	3	0.021185	0.87581	0.69225	0.41427	0.70119	0.62481	0.75712	0.56011	0.55758	0.14242	0.12393	0.028143			0.025166	0.83105	0.76168	0.7412	0.63397	0.69519	0.87505	0.64228	0.72136	0.62938	0.43082	0.41845	1.8706	0.027905	0.022702
O14578;O14578-4;O14578-2	440;440;440	O14578	O14578	Citron Rho-interacting kinase	CIT	>sp|O14578|CTRO_HUMAN Citron Rho-interacting kinase OS=Homo sapiens GN=CIT PE=1 SV=2;>sp|O14578-4|CTRO_HUMAN Isoform 4 of Citron Rho-interacting kinase OS=Homo sapiens GN=CIT;>sp|O14578-2|CTRO_HUMAN Isoform 2 of Citron Rho-interacting kinase OS=Homo sapien	0.999999	61.4911	1.26006e-35	199.05	138.42	1	S	LGILGRSESVVSGLDSPAKTSSMEKKLLIKS	X;X;X;X;X;X;X;X;X;X;X;X;X;X;X;Phospho (STY);X;X;X;X;X;X;X;X;X;X;X;X;X;X;X	PPPPPPPPPPPPPPPPPPPXXXXXXXXXXXX	SESVVSGLDS(1)PAK	S(-137.13)ES(-106.5)VVS(-61.49)GLDS(61.49)PAK	10	2	0.071815	0.85416	0.59825		0.64771	0.59611	0.70069					0.13703				0.71327	0.73971	0.78601	0.62897	0.68797	0.64982	0.69763	0.72738	0.68473	0.58671	0.68235	0.21963	0.18191
O14578;O14578-4;O14578-3	1993;2035;1510	O14578	O14578	Citron Rho-interacting kinase	CIT	>sp|O14578|CTRO_HUMAN Citron Rho-interacting kinase OS=Homo sapiens GN=CIT PE=1 SV=2;>sp|O14578-4|CTRO_HUMAN Isoform 4 of Citron Rho-interacting kinase OS=Homo sapiens GN=CIT;>sp|O14578-3|CTRO_HUMAN Isoform 3 of Citron Rho-interacting kinase OS=Homo sapien	1	114.689	0.00291009	147.33	96.973	1	S	REKSPGRMLSTRRERSPGRLFEDSSRGRLPA	X;X;X;X;X;X;X;X;X;X;X;X;X;X;X;Phospho (STY);X;X;X;X;X;X;X;X;X;X;X;X;X;X;X	XXXXXXXXXXXXXPPPPPPPPPPPPPXXXXX	ERS(1)PGRLFEDSSR	ERS(114.69)PGRLFEDS(-114.69)S(-127.22)R	3	3	-0.40227		1.3909			1.1186
O14578;O14578-4;O14578-3	1940;1982;1457	O14578	O14578	Citron Rho-interacting kinase	CIT	>sp|O14578|CTRO_HUMAN Citron Rho-interacting kinase OS=Homo sapiens GN=CIT PE=1 SV=2;>sp|O14578-4|CTRO_HUMAN Isoform 4 of Citron Rho-interacting kinase OS=Homo sapiens GN=CIT;>sp|O14578-3|CTRO_HUMAN Isoform 3 of Citron Rho-interacting kinase OS=Homo sapien	0.814888	6.50577	0.0047039	57.288	29.257	2	S	GPPTYNEHITKRVASSPAPPEGPSHPREPST	X;X;X;X;X;X;X;X;X;X;X;X;X;X;X;Phospho (STY);X;X;X;X;X;X;X;X;X;X;X;X;X;X;Phospho (STY)	XXXXXXXXXXXPPPPPPPPPPPPPPPPPPPP	RVAS(0.185)S(0.815)PAPPEGPS(0.005)HPREPS(0.184)T(0.811)PHR	RVAS(-6.51)S(6.51)PAPPEGPS(-21.82)HPREPS(-6.51)T(6.51)PHR	5	4	0.5061															1.2961
O14579;O14579-2;O14579-3	10;10;10	O14579	O14579	Coatomer subunit epsilon	COPE	>sp|O14579|COPE_HUMAN Coatomer subunit epsilon OS=Homo sapiens GN=COPE PE=1 SV=3;>sp|O14579-2|COPE_HUMAN Isoform 2 of Coatomer subunit epsilon OS=Homo sapiens GN=COPE;>sp|O14579-3|COPE_HUMAN Isoform 3 of Coatomer subunit epsilon OS=Homo sapiens GN=COPE	0.954932	13.261	0.000471921	107.93	79.115	1	S	______MAPPAPGPASGGSGEVDELFDVKNA	X;X;X;X;X;X;X;X;X;X;X;X;X;X;X;Phospho (STY);X;X;X;X;X;X;X;X;X;X;X;X;X;X;X	XXXXXXXPPPPPPPPPPPPPPPPPPPPPPXX	APPAPGPAS(0.955)GGS(0.045)GEVDELFDVK	APPAPGPAS(13.26)GGS(-13.26)GEVDELFDVK	9	3	0.2105		0.91729		1.0672	0.59206	0.51879	0.75204	0.80832	0.92239	0.65554	0.83509		2.8892
O14579;O14579-2;O14579-3	13;13;13	O14579	O14579	Coatomer subunit epsilon	COPE	>sp|O14579|COPE_HUMAN Coatomer subunit epsilon OS=Homo sapiens GN=COPE PE=1 SV=3;>sp|O14579-2|COPE_HUMAN Isoform 2 of Coatomer subunit epsilon OS=Homo sapiens GN=COPE;>sp|O14579-3|COPE_HUMAN Isoform 3 of Coatomer subunit epsilon OS=Homo sapiens GN=COPE	0.995968	23.9276	0.000320885	122.52	86.757	1	S	___MAPPAPGPASGGSGEVDELFDVKNAFYI	X;X;X;X;X;X;X;X;X;X;X;X;X;X;X;Phospho (STY);X;X;X;X;X;X;X;X;X;X;X;X;X;X;X	XXXXPPPPPPPPPPPPPPPPPPPPPPXXXXX	APPAPGPAS(0.004)GGS(0.996)GEVDELFDVK	APPAPGPAS(-23.93)GGS(23.93)GEVDELFDVK	12	3	0.62554	1.0269														0.65112			0.91053							1.2168
O14579;O14579-2;O14579-3	45;45;45	O14579	O14579	Coatomer subunit epsilon	COPE	>sp|O14579|COPE_HUMAN Coatomer subunit epsilon OS=Homo sapiens GN=COPE PE=1 SV=3;>sp|O14579-2|COPE_HUMAN Isoform 2 of Coatomer subunit epsilon OS=Homo sapiens GN=COPE;>sp|O14579-3|COPE_HUMAN Isoform 3 of Coatomer subunit epsilon OS=Homo sapiens GN=COPE	0.995198	23.1651	0.00252342	169.76	141.71	1	S	SYQQCINEAQRVKLSSPERDVERDVFLYRAY	X;X;X;X;X;X;X;X;X;X;X;X;X;X;X;Phospho (STY);X;X;X;X;X;X;X;X;X;X;X;X;X;X;X	XXXXXXXXXXXXXPPPPPPPPPPPPPPPPXX	LS(0.005)S(0.995)PERDVERDVFLYR	LS(-23.17)S(23.17)PERDVERDVFLY(-143.43)R	3	3	1.2696
O14617-2;O14617;O14617-5;O14617-3;O14617-4	567;658;658;489;658	O14617-2	O14617-2	AP-3 complex subunit delta-1	AP3D1	>sp|O14617-2|AP3D1_HUMAN Isoform 2 of AP-3 complex subunit delta-1 OS=Homo sapiens GN=AP3D1;>sp|O14617|AP3D1_HUMAN AP-3 complex subunit delta-1 OS=Homo sapiens GN=AP3D1 PE=1 SV=1;>sp|O14617-5|AP3D1_HUMAN Isoform 5 of AP-3 complex subunit delta-1 OS=Homo sa	1	122.459	0.000790204	180.3	129.35	1	S	AVFHEEEQRRPKHRPSEADEEELARRREARK	X;X;X;X;X;X;X;X;X;X;X;X;X;X;X;Phospho (STY);X;X;X;X;X;X;X;X;X;X;X;X;X;X;X	XXXXXXXXXXXXPPPPPPPPPPPPPXXXXXX	HRPS(1)EADEEELAR	HRPS(122.46)EADEEELAR	4	3	-1.2654	0.89859	0.99105	0.66192
O14617-2	785	O14617-2	O14617-2	AP-3 complex subunit delta-1	AP3D1	>sp|O14617-2|AP3D1_HUMAN Isoform 2 of AP-3 complex subunit delta-1 OS=Homo sapiens GN=AP3D1	0.599901	4.76945	1.64024e-06	75.436	45.435	1	S	KKEKEKKAEDLDFWLSTTPPPAPAPAPAPVP	X;X;X;X;X;X;X;X;X;X;X;X;X;X;X;Phospho (STY);X;X;X;X;X;X;X;X;X;X;X;X;X;X;X	XXXXXXPPPPPPPPPPPPPPPPPPPPPPPPP	KAEDLDFWLS(0.6)T(0.2)T(0.2)PPPAPAPAPAPVPSTDECEDAK	KAEDLDFWLS(4.77)T(-4.77)T(-4.77)PPPAPAPAPAPVPS(-57.31)T(-57.31)DECEDAK	10	3	0.32483							1.333			1.6118
O14639;O14639-5;O14639-3;O14639-2;O14639-6;O14639-4	426;138;110;366;394;84	O14639	O14639	Actin-binding LIM protein 1	ABLIM1	>sp|O14639|ABLM1_HUMAN Actin-binding LIM protein 1 OS=Homo sapiens GN=ABLIM1 PE=1 SV=3;>sp|O14639-5|ABLM1_HUMAN Isoform 5 of Actin-binding LIM protein 1 OS=Homo sapiens GN=ABLIM1;>sp|O14639-3|ABLM1_HUMAN Isoform 3 of Actin-binding LIM protein 1 OS=Homo sap	0.973205	15.2436	0.00176505	65.416	43.769	2	S	TSGYDDKQERQSLGESPRTLSPTPSAEGYQD	X;X;X;X;X;X;X;X;X;X;X;X;X;X;X;Phospho (STY);X;X;Phospho (STY);X;Phospho (STY);X;X;X;X;X;X;X;X;X;X	XXXXXXXXXXPPPPPPPPPPPPPPPPPPPPP	QS(0.004)LGES(0.973)PRT(0.289)LS(0.711)PT(0.02)PS(0.002)AEGY(0.001)QDVR	QS(-24.12)LGES(15.24)PRT(-4.11)LS(4.11)PT(-15.89)PS(-26.47)AEGY(-28.98)QDVR	6	3	-0.43076
O14639;O14639-5;O14639-3;O14639-2;O14639-6;O14639-4	431;143;115;371;399;89	O14639	O14639	Actin-binding LIM protein 1	ABLIM1	>sp|O14639|ABLM1_HUMAN Actin-binding LIM protein 1 OS=Homo sapiens GN=ABLIM1 PE=1 SV=3;>sp|O14639-5|ABLM1_HUMAN Isoform 5 of Actin-binding LIM protein 1 OS=Homo sapiens GN=ABLIM1;>sp|O14639-3|ABLM1_HUMAN Isoform 3 of Actin-binding LIM protein 1 OS=Homo sap	0.999917	40.8585	6.27949e-29	179.46	150.11	1;2	S	DKQERQSLGESPRTLSPTPSAEGYQDVRDRM	X;X;X;X;X;X;X;X;X;X;Phospho (STY);X;X;X;X;Phospho (STY);X;X;X;X;X;X;X;X;X;X;X;X;X;X;X	XXXXXPPPPPPPPPPPPPPPPPPPPPPPXXX	TLS(1)PTPSAEGYQDVR	T(-59.15)LS(40.86)PT(-40.86)PS(-71.65)AEGY(-84.79)QDVR	3	2	-0.56113	0.8078	0.38888	0.28549	0.59078	0.5398	0.73287	0.52162	0.86593	0.9854	1.3416	1.5078	1.2966	1.6902	1.9152		0.83736	0.94882	0.77867				0.88549		0.97485	0.495	0.32161	1.4407	0.5607
O14639;O14639-5;O14639-3;O14639-2;O14639-6;O14639-4	632;309;281;572;602;255	O14639	O14639	Actin-binding LIM protein 1	ABLIM1	>sp|O14639|ABLM1_HUMAN Actin-binding LIM protein 1 OS=Homo sapiens GN=ABLIM1 PE=1 SV=3;>sp|O14639-5|ABLM1_HUMAN Isoform 5 of Actin-binding LIM protein 1 OS=Homo sapiens GN=ABLIM1;>sp|O14639-3|ABLM1_HUMAN Isoform 3 of Actin-binding LIM protein 1 OS=Homo sap	0.450966	2.65594	0.000282457	65.881	30.748		S	LILKEEMEKESRERSSLLASRYDSPINSASH	X;X;X;X;X;X;X;X;X;X;X;X;X;X;X;Phospho (STY);X;X;X;X;X;Phospho (STY);X;Phospho (STY);X;X;X;X;X;Phospho (STY);X	XXXXXXXXXXXXXXPPPPPPPPPPPPPPPPP	S(0.121)S(0.451)LLAS(0.121)RY(0.06)DS(0.245)PINS(0.002)ASHIPSSK	S(-5.71)S(2.66)LLAS(-5.71)RY(-8.74)DS(-2.66)PINS(-24.08)AS(-43.12)HIPS(-59.74)S(-59.74)K	2	3	-0.63996
O14639;O14639-5;O14639-3;O14639-2;O14639-6;O14639-4	636;313;285;576;606;259	O14639	O14639	Actin-binding LIM protein 1	ABLIM1	>sp|O14639|ABLM1_HUMAN Actin-binding LIM protein 1 OS=Homo sapiens GN=ABLIM1 PE=1 SV=3;>sp|O14639-5|ABLM1_HUMAN Isoform 5 of Actin-binding LIM protein 1 OS=Homo sapiens GN=ABLIM1;>sp|O14639-3|ABLM1_HUMAN Isoform 3 of Actin-binding LIM protein 1 OS=Homo sap	0.339736	0	0.00315949	59.339	34.181		S	EEMEKESRERSSLLASRYDSPINSASHIPSS	X;X;X;X;X;X;X;X;X;X;X;X;X;X;X;Phospho (STY);X;Phospho (STY);X;Phospho (STY);X;X;X;X;X;Phospho (STY);X;X;X;X;X	XXXXXXXXXXPPPPPPPPPPPPPPPPPPPPP	S(0.004)S(0.017)LLAS(0.34)RY(0.294)DS(0.34)PINS(0.005)ASHIPSSK	S(-19.2)S(-12.92)LLAS(0)RY(-0.63)DS(0)PINS(-18.39)AS(-33.84)HIPS(-48.59)S(-48.59)K	6	3	0.095765
O14639;O14639-5;O14639-3;O14639-2;O14639-6;O14639-4	640;317;289;580;610;263	O14639	O14639	Actin-binding LIM protein 1	ABLIM1	>sp|O14639|ABLM1_HUMAN Actin-binding LIM protein 1 OS=Homo sapiens GN=ABLIM1 PE=1 SV=3;>sp|O14639-5|ABLM1_HUMAN Isoform 5 of Actin-binding LIM protein 1 OS=Homo sapiens GN=ABLIM1;>sp|O14639-3|ABLM1_HUMAN Isoform 3 of Actin-binding LIM protein 1 OS=Homo sap	0.999976	46.402	5.95442e-06	164.92	127.26	1	S	KESRERSSLLASRYDSPINSASHIPSSKTAS	X;X;X;X;X;X;X;X;X;X;X;X;X;X;X;Phospho (STY);X;X;X;X;X;X;X;X;X;X;X;X;X;X;X	XXXXXXPPPPPPPPPPPPPPPPPPPPPPXXX	YDS(1)PINSASHIPSSK	Y(-46.4)DS(46.4)PINS(-59.34)AS(-67.7)HIPS(-129.83)S(-144.53)K	3	3	-0.045838	0.87052	0.60064	0.39749	0.5797	0.62238	0.98909		0.72566							0.76141	0.77426	0.5748	0.71944	0.56247	0.85827	0.54652	0.72076	0.54474	0.49802	0.44601
O14639;O14639-5;O14639-3;O14639-2;O14639-6;O14639-4	455;167;139;395;423;113	O14639	O14639	Actin-binding LIM protein 1	ABLIM1	>sp|O14639|ABLM1_HUMAN Actin-binding LIM protein 1 OS=Homo sapiens GN=ABLIM1 PE=1 SV=3;>sp|O14639-5|ABLM1_HUMAN Isoform 5 of Actin-binding LIM protein 1 OS=Homo sapiens GN=ABLIM1;>sp|O14639-3|ABLM1_HUMAN Isoform 3 of Actin-binding LIM protein 1 OS=Homo sap	0.872625	8.38033	4.54773e-05	108.47	75.362	1	S	QDVRDRMIHRSTSQGSINSPVYSRHSYTPTT	X;X;X;X;X;X;X;X;X;X;X;X;X;X;X;Phospho (STY);X;X;X;X;X;X;X;X;X;X;X;X;X;X;X	XXXXXXXXXXPPPPPPPPPPPPPPXXXXXXX	STSQGS(0.873)INS(0.127)PVYSR	S(-48.82)T(-41.12)S(-33.81)QGS(8.38)INS(-8.38)PVY(-37.31)S(-41.22)R	6	2	-0.025339		0.59288
O14639;O14639-5;O14639-3;O14639-2;O14639-6;O14639-4	458;170;142;398;426;116	O14639	O14639	Actin-binding LIM protein 1	ABLIM1	>sp|O14639|ABLM1_HUMAN Actin-binding LIM protein 1 OS=Homo sapiens GN=ABLIM1 PE=1 SV=3;>sp|O14639-5|ABLM1_HUMAN Isoform 5 of Actin-binding LIM protein 1 OS=Homo sapiens GN=ABLIM1;>sp|O14639-3|ABLM1_HUMAN Isoform 3 of Actin-binding LIM protein 1 OS=Homo sap	0.999992	52.6891	2.33041e-37	185.2	125.31	1	S	RDRMIHRSTSQGSINSPVYSRHSYTPTTSRS	X;X;X;X;X;X;X;X;X;X;X;X;X;X;X;Phospho (STY);X;X;X;X;X;X;X;X;X;X;X;X;X;X;X	XXXXXXXPPPPPPPPPPPPPPXXXXXXXXXX	STSQGSINS(1)PVYSR	S(-133.01)T(-126.02)S(-111.21)QGS(-56.76)INS(52.69)PVY(-52.69)S(-63.69)R	9	2	-0.40581	1.0029	0.59288	0.36233	0.61071											0.75734	0.71313	0.65813	0.57235	0.67945	0.5645	0.54466	0.63512	0.58818	0.47426	0.49454
O14639;O14639-5;O14639-3;O14639-2;O14639-6	362;74;46;302;330	O14639	O14639	Actin-binding LIM protein 1	ABLIM1	>sp|O14639|ABLM1_HUMAN Actin-binding LIM protein 1 OS=Homo sapiens GN=ABLIM1 PE=1 SV=3;>sp|O14639-5|ABLM1_HUMAN Isoform 5 of Actin-binding LIM protein 1 OS=Homo sapiens GN=ABLIM1;>sp|O14639-3|ABLM1_HUMAN Isoform 3 of Actin-binding LIM protein 1 OS=Homo sap	0.32992	0	0.00243951	57.703	38.769		S	RPTRTSSESIYSRPGSSIPGSPGHTIYAKVD	X;X;X;X;X;X;X;X;X;X;X;X;X;X;X;Phospho (STY);X;X;X;X;X;X;X;X;X;X;X;X;X;X;X	XXXXPPPPPPPPPPPPPPPPPPPPPPPPPXX	TSSESIY(0.001)S(0.005)RPGS(0.33)S(0.33)IPGS(0.33)PGHT(0.004)IYAK	T(-48.5)S(-48.5)S(-45.5)ES(-36.75)IY(-25.34)S(-18.45)RPGS(0)S(0)IPGS(0)PGHT(-18.93)IY(-31.29)AK	12	4	-0.11964
O14639;O14639-5;O14639-3;O14639-2;O14639-6	363;75;47;303;331	O14639	O14639	Actin-binding LIM protein 1	ABLIM1	>sp|O14639|ABLM1_HUMAN Actin-binding LIM protein 1 OS=Homo sapiens GN=ABLIM1 PE=1 SV=3;>sp|O14639-5|ABLM1_HUMAN Isoform 5 of Actin-binding LIM protein 1 OS=Homo sapiens GN=ABLIM1;>sp|O14639-3|ABLM1_HUMAN Isoform 3 of Actin-binding LIM protein 1 OS=Homo sap	0.801285	7.06892	0.00135115	79.346	62.2	1	S	PTRTSSESIYSRPGSSIPGSPGHTIYAKVDN	X;X;X;X;X;X;X;X;X;X;X;X;X;X;X;Phospho (STY);X;X;X;X;X;X;X;X;X;X;X;X;X;X;X	XXXPPPPPPPPPPPPPPPPPPPPPPPPPXXX	TSSESIYSRPGS(0.033)S(0.801)IPGS(0.157)PGHT(0.007)IYAK	T(-50.11)S(-50.11)S(-47.68)ES(-42.91)IY(-37.78)S(-37.78)RPGS(-13.84)S(7.07)IPGS(-7.07)PGHT(-20.31)IY(-32.29)AK	13	4	-0.40943
O14639;O14639-5;O14639-3;O14639-2;O14639-6	367;79;51;307;335	O14639	O14639	Actin-binding LIM protein 1	ABLIM1	>sp|O14639|ABLM1_HUMAN Actin-binding LIM protein 1 OS=Homo sapiens GN=ABLIM1 PE=1 SV=3;>sp|O14639-5|ABLM1_HUMAN Isoform 5 of Actin-binding LIM protein 1 OS=Homo sapiens GN=ABLIM1;>sp|O14639-3|ABLM1_HUMAN Isoform 3 of Actin-binding LIM protein 1 OS=Homo sap	0.999224	31.6679	1.36043e-05	102.39	66.76	1	S	SSESIYSRPGSSIPGSPGHTIYAKVDNEILD	X;X;X;X;X;X;X;X;X;X;X;X;X;X;X;Phospho (STY);X;X;X;X;X;X;X;X;X;X;X;X;X;X;X	PPPPPPPPPPPPPPPPPPPPPPPPXXXXXXX	TSSESIYSRPGSSIPGS(0.999)PGHT(0.001)IYAK	T(-93.4)S(-90.45)S(-90.45)ES(-79.47)IY(-78.29)S(-73.02)RPGS(-56.4)S(-56.4)IPGS(31.67)PGHT(-31.67)IY(-40.42)AK	17	3	0.34305					1.4372			1.1653	0.96368	0.79506
O14646-2;O14646	1671;1671	O14646-2	O14646-2	Chromodomain-helicase-DNA-binding protein 1	CHD1	>sp|O14646-2|CHD1_HUMAN Isoform 2 of Chromodomain-helicase-DNA-binding protein 1 OS=Homo sapiens GN=CHD1;>sp|O14646|CHD1_HUMAN Chromodomain-helicase-DNA-binding protein 1 OS=Homo sapiens GN=CHD1 PE=1 SV=2	0.62857	5.85984	0.00453414	71.354	38.495	1	S	RDYRYHSDWQMDHRASSSGPRSPLDQRSYGS	X;X;X;X;X;X;X;X;X;X;X;X;X;X;X;Phospho (STY);X;X;X;X;X;X;X;X;X;X;X;X;X;X;X	XXXXXXXXXXXXXXPPPPPPPPPPPPPXXXX	AS(0.629)S(0.163)S(0.163)GPRS(0.045)PLDQR	AS(5.86)S(-5.86)S(-5.86)GPRS(-11.42)PLDQR	2	2	-0.0059617	0.85775	0.73372	0.39028	0.82265	0.78871	0.89959					0.38435		0.28647	0.24837
O14646-2;O14646	1672;1672	O14646-2	O14646-2	Chromodomain-helicase-DNA-binding protein 1	CHD1	>sp|O14646-2|CHD1_HUMAN Isoform 2 of Chromodomain-helicase-DNA-binding protein 1 OS=Homo sapiens GN=CHD1;>sp|O14646|CHD1_HUMAN Chromodomain-helicase-DNA-binding protein 1 OS=Homo sapiens GN=CHD1 PE=1 SV=2	0.683756	5.97001	0.00131622	81.346	40.579	1	S	DYRYHSDWQMDHRASSSGPRSPLDQRSYGSR	X;X;X;X;X;X;X;X;X;X;X;X;X;X;X;Phospho (STY);X;X;X;X;X;X;X;X;X;X;X;X;X;X;X	XXXXXXXXXXXXXPPPPPPPPPPPPPXXXXX	AS(0.173)S(0.684)S(0.139)GPRS(0.004)PLDQR	AS(-5.97)S(5.97)S(-6.92)GPRS(-22.05)PLDQR	3	2	-0.19878
O14646-2;O14646	1677;1677	O14646-2	O14646-2	Chromodomain-helicase-DNA-binding protein 1	CHD1	>sp|O14646-2|CHD1_HUMAN Isoform 2 of Chromodomain-helicase-DNA-binding protein 1 OS=Homo sapiens GN=CHD1;>sp|O14646|CHD1_HUMAN Chromodomain-helicase-DNA-binding protein 1 OS=Homo sapiens GN=CHD1 PE=1 SV=2	1	80.1985	0.000310451	176.48	116.23	1	S	SDWQMDHRASSSGPRSPLDQRSYGSRSPFEH	X;X;X;X;X;X;X;X;X;X;X;X;X;X;X;Phospho (STY);X;X;X;X;X;X;X;X;X;X;Phospho (STY);X;X;X;X	XXXXXXXXPPPPPPPPPPPPPXXXXXXXXXX	ASSSGPRS(1)PLDQR	AS(-106.92)S(-103.2)S(-80.2)GPRS(80.2)PLDQR	8	3	-0.12772	1.0215	0.54738		0.74887	0.58682			0.96577	0.93317	0.82692		0.35173			0.76437	0.83808	0.75044	0.70834	0.90727	0.90585	0.61209	0.90758	0.82702	0.77331	0.94924	0.50773	0.50704
O14646-2;O14646	1384;1384	O14646-2	O14646-2	Chromodomain-helicase-DNA-binding protein 1	CHD1	>sp|O14646-2|CHD1_HUMAN Isoform 2 of Chromodomain-helicase-DNA-binding protein 1 OS=Homo sapiens GN=CHD1;>sp|O14646|CHD1_HUMAN Chromodomain-helicase-DNA-binding protein 1 OS=Homo sapiens GN=CHD1 PE=1 SV=2	0.333165	0	0.00010661	75.193	53.526		S	KLSESKSDGRERSKKSSVSDAPVHITASGEP	X;X;X;X;X;X;X;X;X;X;X;X;X;X;X;Phospho (STY);X;X;X;X;X;X;X;X;X;X;X;X;X;X;X	XXXXXXXXXXXXXXPPPPPPPPPPPPPPPPP	KS(0.333)S(0.333)VS(0.333)DAPVHITASGEPVPISEESEELDQK	KS(0)S(0)VS(0)DAPVHIT(-30.98)AS(-31.52)GEPVPIS(-51.41)EES(-51.41)EELDQK	2	3	-0.030324
O14646-2;O14646	1385;1385	O14646-2	O14646-2	Chromodomain-helicase-DNA-binding protein 1	CHD1	>sp|O14646-2|CHD1_HUMAN Isoform 2 of Chromodomain-helicase-DNA-binding protein 1 OS=Homo sapiens GN=CHD1;>sp|O14646|CHD1_HUMAN Chromodomain-helicase-DNA-binding protein 1 OS=Homo sapiens GN=CHD1 PE=1 SV=2	0.333165	0	0.00010661	75.193	53.526		S	LSESKSDGRERSKKSSVSDAPVHITASGEPV	X;X;X;X;X;X;X;X;X;X;X;X;X;X;X;X;X;X;X;X;X;X;X;X;X;X;X;X;X;X;X	XXXXXXXXXXXXXXXXXXXXXXXXXXXXXXX	KS(0.333)S(0.333)VS(0.333)DAPVHITASGEPVPISEESEELDQK	KS(0)S(0)VS(0)DAPVHIT(-30.98)AS(-31.52)GEPVPIS(-51.41)EES(-51.41)EELDQK	3	3	-0.030324
O14646-2;O14646	1387;1387	O14646-2	O14646-2	Chromodomain-helicase-DNA-binding protein 1	CHD1	>sp|O14646-2|CHD1_HUMAN Isoform 2 of Chromodomain-helicase-DNA-binding protein 1 OS=Homo sapiens GN=CHD1;>sp|O14646|CHD1_HUMAN Chromodomain-helicase-DNA-binding protein 1 OS=Homo sapiens GN=CHD1 PE=1 SV=2	0.333165	0	0.00010661	75.193	53.526		S	ESKSDGRERSKKSSVSDAPVHITASGEPVPI	X;X;X;X;X;X;X;X;X;X;X;X;X;X;X;X;X;X;X;X;X;X;X;X;X;X;X;X;X;X;X	XXXXXXXXXXXXXXXXXXXXXXXXXXXXXXX	KS(0.333)S(0.333)VS(0.333)DAPVHITASGEPVPISEESEELDQK	KS(0)S(0)VS(0)DAPVHIT(-30.98)AS(-31.52)GEPVPIS(-51.41)EES(-51.41)EELDQK	5	3	-0.030324
O14646-2;O14646	1396;1396	O14646-2	O14646-2	Chromodomain-helicase-DNA-binding protein 1	CHD1	>sp|O14646-2|CHD1_HUMAN Isoform 2 of Chromodomain-helicase-DNA-binding protein 1 OS=Homo sapiens GN=CHD1;>sp|O14646|CHD1_HUMAN Chromodomain-helicase-DNA-binding protein 1 OS=Homo sapiens GN=CHD1 PE=1 SV=2	0.887268	9.22099	5.80604e-08	88.573	48.253	1	S	SKKSSVSDAPVHITASGEPVPISEESEELDQ	X;X;X;X;X;X;X;X;X;X;X;X;X;X;X;Phospho (STY);X;X;X;X;X;X;X;X;X;X;X;X;X;X;X	XXPPPPPPPPPPPPPPPPPPPPPPPPPPPPP	S(0.002)S(0.002)VS(0.002)DAPVHIT(0.106)AS(0.887)GEPVPIS(0.001)EESEELDQK	S(-27.23)S(-27.23)VS(-27.23)DAPVHIT(-9.22)AS(9.22)GEPVPIS(-28.07)EES(-37.75)EELDQK	13	3	-1.5011																		0.95325
O14646-2;O14646	89;89	O14646-2	O14646-2	Chromodomain-helicase-DNA-binding protein 1	CHD1	>sp|O14646-2|CHD1_HUMAN Isoform 2 of Chromodomain-helicase-DNA-binding protein 1 OS=Homo sapiens GN=CHD1;>sp|O14646|CHD1_HUMAN Chromodomain-helicase-DNA-binding protein 1 OS=Homo sapiens GN=CHD1 PE=1 SV=2	0.565794	1.15314	0.000256248	92.247	51.083	1	S	VQAKPPKVDGAEFWKSSPSILAVQRSAILKK	X;X;X;X;X;X;X;X;X;X;X;X;X;X;X;Phospho (STY);X;X;X;X;X;X;X;X;X;X;X;X;X;X;X	XXXXXXXXXXXXXXXPPPPPPPPPPXXXXXX	S(0.566)S(0.434)PSILAVQR	S(1.15)S(-1.15)PS(-32.08)ILAVQR	1	2	-0.26809
O14646-2;O14646	90;90	O14646-2	O14646-2	Chromodomain-helicase-DNA-binding protein 1	CHD1	>sp|O14646-2|CHD1_HUMAN Isoform 2 of Chromodomain-helicase-DNA-binding protein 1 OS=Homo sapiens GN=CHD1;>sp|O14646|CHD1_HUMAN Chromodomain-helicase-DNA-binding protein 1 OS=Homo sapiens GN=CHD1 PE=1 SV=2	0.999396	32.2789	1.37225e-10	152.96	109.46	1	S	QAKPPKVDGAEFWKSSPSILAVQRSAILKKQ	X;X;X;X;X;X;X;X;X;X;X;X;X;X;X;Phospho (STY);X;X;X;X;X;X;X;X;X;X;X;X;X;X;X	XXXXXXXXXXXXXXPPPPPPPPPPXXXXXXX	S(0.001)S(0.999)PSILAVQR	S(-32.28)S(32.28)PS(-48.93)ILAVQR	2	2	-0.1541	0.89423	0.63574	0.33941	0.59186	0.51432	0.72168	0.51203	0.50866							0.55799	0.63377	0.51448	0.52375	0.56148	0.46918	0.42904	0.50394	0.43212	0.31295	0.27925
O14646-2	1688	O14646-2	O14646-2	Chromodomain-helicase-DNA-binding protein 1	CHD1	>sp|O14646-2|CHD1_HUMAN Isoform 2 of Chromodomain-helicase-DNA-binding protein 1 OS=Homo sapiens GN=CHD1	0.999945	46.0704	0.00169481	145.09	100.57	1	S	SGPRSPLDQRSYGSRSPFEHSVEHKSTPEHT	X;X;X;X;Phospho (STY);X;X;X;X;X;X;X;X;X;X;Phospho (STY);X;X;X;X;X;X;X;X;X;Phospho (STY);X;X;X;X;X	XXXXXXXXXXPPPPPPPPPPPPPPPXXXXXX	SYGSRS(1)PFEHSVEHK	S(-54.75)Y(-54.75)GS(-46.27)RS(46.07)PFEHS(-46.07)VEHK	6	4	0.091707		2.4509
O14646-2;O14646	1040;1040	O14646-2	O14646-2	Chromodomain-helicase-DNA-binding protein 1	CHD1	>sp|O14646-2|CHD1_HUMAN Isoform 2 of Chromodomain-helicase-DNA-binding protein 1 OS=Homo sapiens GN=CHD1;>sp|O14646|CHD1_HUMAN Chromodomain-helicase-DNA-binding protein 1 OS=Homo sapiens GN=CHD1 PE=1 SV=2	1	86.6416	1.18503e-05	101.53	73.665	1	S	SNMDEDDIELEPERNSKNWEEIIPEDQRRRL	X;X;X;X;X;X;X;X;X;X;X;X;X;X;X;Phospho (STY);X;X;X;X;X;X;X;X;X;X;X;X;X;X;X	PPPPPPPPPPPPPPPPPXXXXXXXXXXXXXX	VANFSNMDEDDIELEPERNS(1)K	VANFS(-86.64)NMDEDDIELEPERNS(86.64)K	20	3	0.30091	0.91274	0.77523	0.48386	0.95054	0.86847			0.95369			0.7952			1.0355	1.0343	0.87228		0.90438	0.93564	0.79663					0.94331	0.7161	0.76545	0.78909
O14653;O14653-3;O14653-2	114;114;114	O14653	O14653	Golgi SNAP receptor complex member 2	GOSR2	>sp|O14653|GOSR2_HUMAN Golgi SNAP receptor complex member 2 OS=Homo sapiens GN=GOSR2 PE=1 SV=2;>sp|O14653-3|GOSR2_HUMAN Isoform 3 of Golgi SNAP receptor complex member 2 OS=Homo sapiens GN=GOSR2;>sp|O14653-2|GOSR2_HUMAN Isoform B of Golgi SNAP receptor com	0.516386	4.6986	0.00147732	47.931	30.253	1	S	RQREELLSRTFTTNDSDTTIPMDESLQFNSS	X;X;X;X;X;X;X;X;X;X;X;X;X;X;X;Phospho (STY);X;X;X;X;X;X;X;X;X;X;X;X;X;X;X	XXXXXXXXXPPPPPPPPPPPPPPPPPPPPPP	T(0.016)FT(0.016)T(0.175)NDS(0.516)DT(0.138)T(0.138)IPMDES(0.001)LQFNSSLQK	T(-15.04)FT(-15.04)T(-4.7)NDS(4.7)DT(-5.75)T(-5.75)IPMDES(-29.27)LQFNS(-31.63)S(-33.86)LQK	7	3	0.013963
O14662;O14662-5	34;34	O14662	O14662	Syntaxin-16	STX16	>sp|O14662|STX16_HUMAN Syntaxin-16 OS=Homo sapiens GN=STX16 PE=1 SV=3;>sp|O14662-5|STX16_HUMAN Isoform E of Syntaxin-16 OS=Homo sapiens GN=STX16	0.420353	0	0.000321391	111.73	79.16		S	QNRQLLAEQVSSHITSSPLHSRSIAAELDEL	X;X;X;X;X;X;X;X;X;X;X;X;X;X;X;X;X;X;X;X;X;X;X;X;X;X;X;X;X;X;X	XXXXXXXXXXXXXXXXXXXXXXXXXXXXXXX	QLLAEQVS(0.001)S(0.013)HIT(0.42)S(0.42)S(0.144)PLHSR	QLLAEQVS(-24.95)S(-14.98)HIT(0)S(0)S(-4.64)PLHS(-34.54)R	13	4	-0.14982
O14662;O14662-5	35;35	O14662	O14662	Syntaxin-16	STX16	>sp|O14662|STX16_HUMAN Syntaxin-16 OS=Homo sapiens GN=STX16 PE=1 SV=3;>sp|O14662-5|STX16_HUMAN Isoform E of Syntaxin-16 OS=Homo sapiens GN=STX16	0.999942	45.4019	6.49819e-06	212.34	178.29	1	S	NRQLLAEQVSSHITSSPLHSRSIAAELDELA	X;X;X;X;X;X;X;X;X;X;X;X;X;X;X;Phospho (STY);X;X;X;X;X;X;X;X;X;X;X;X;X;X;X	XXPPPPPPPPPPPPPPPPPPPXXXXXXXXXX	QLLAEQVSSHITSS(1)PLHSR	QLLAEQVS(-104.28)S(-85.37)HIT(-45.4)S(-45.4)S(45.4)PLHS(-83.68)R	14	3	0.14908				0.95808
O14686;O14686-3	1798;1801	O14686	O14686	Histone-lysine N-methyltransferase 2D	KMT2D	>sp|O14686|KMT2D_HUMAN Histone-lysine N-methyltransferase 2D OS=Homo sapiens GN=KMT2D PE=1 SV=2;>sp|O14686-3|KMT2D_HUMAN Isoform 3 of Histone-lysine N-methyltransferase 2D OS=Homo sapiens GN=KMT2D	1	60.5499	1.59185e-05	336.71	270.04	2	S	DLSRKALFAVGVGRPSFGLGTPKAKGDGGSE	X;X;X;X;X;X;X;X;X;X;X;X;X;X;X;Phospho (STY);X;X;X;X;Phospho (STY);X;X;X;X;X;X;X;X;X;X	XXXXXPPPPPPPPPPPPPPPPPPXXXXXXXX	ALFAVGVGRPS(1)FGLGT(1)PK	ALFAVGVGRPS(60.55)FGLGT(60.55)PK	11	3	0.1783
O14686;O14686-3	2274;2277	O14686	O14686	Histone-lysine N-methyltransferase 2D	KMT2D	>sp|O14686|KMT2D_HUMAN Histone-lysine N-methyltransferase 2D OS=Homo sapiens GN=KMT2D PE=1 SV=2;>sp|O14686-3|KMT2D_HUMAN Isoform 3 of Histone-lysine N-methyltransferase 2D OS=Homo sapiens GN=KMT2D	1	76.4781	0.00091179	163.62	115.72	1	S	ESPGVGGGKASEPLLSPPPFGESRKALEVKK	X;X;X;X;X;X;X;X;X;X;X;X;X;X;X;Phospho (STY);X;X;X;X;X;X;X;X;X;X;X;X;X;X;X	XXXXXXXXXPPPPPPPPPPPPPPPPXXXXXX	ASEPLLS(1)PPPFGESRK	AS(-76.48)EPLLS(76.48)PPPFGES(-96.4)RK	7	3	-0.083138
O14686;O14686-3	3199;3202	O14686	O14686	Histone-lysine N-methyltransferase 2D	KMT2D	>sp|O14686|KMT2D_HUMAN Histone-lysine N-methyltransferase 2D OS=Homo sapiens GN=KMT2D PE=1 SV=2;>sp|O14686-3|KMT2D_HUMAN Isoform 3 of Histone-lysine N-methyltransferase 2D OS=Homo sapiens GN=KMT2D	0.989352	20.2946	3.10152e-09	103.36	78.623	1;2	S	SFGATGGPPAHLLTPSPLSGPGGSSLLEKFE	X;X;X;X;X;X;X;X;X;X;X;X;X;Phospho (STY);X;Phospho (STY);X;X;X;X;X;X;X;X;X;X;X;X;X;X;X	PPPPPPPPPPPPPPPPPPPPPPPPPPPPPXX	ASFGATGGPPAHLLTPS(0.989)PLS(0.009)GPGGSSLLEK	AS(-75.28)FGAT(-66.74)GGPPAHLLT(-33.38)PS(20.29)PLS(-20.29)GPGGS(-33.19)S(-33.19)LLEK	17	3	0.62499			0.31013												0.65433	0.76313	0.48362	0.22442					0.38572
O14686;O14686-3	3202;3205	O14686	O14686	Histone-lysine N-methyltransferase 2D	KMT2D	>sp|O14686|KMT2D_HUMAN Histone-lysine N-methyltransferase 2D OS=Homo sapiens GN=KMT2D PE=1 SV=2;>sp|O14686-3|KMT2D_HUMAN Isoform 3 of Histone-lysine N-methyltransferase 2D OS=Homo sapiens GN=KMT2D	0.735078	6.80924	1.33884e-05	76.161	54.212	1	S	ATGGPPAHLLTPSPLSGPGGSSLLEKFELES	X;X;X;X;X;X;X;X;X;X;Phospho (STY);X;X;X;X;Phospho (STY);X;X;X;X;X;X;X;X;X;X;X;X;X;X;X	PPPPPPPPPPPPPPPPPPPPPPPPPPXXXXX	ASFGATGGPPAHLLTPS(0.153)PLS(0.735)GPGGS(0.056)S(0.056)LLEK	AS(-51.38)FGAT(-45.39)GGPPAHLLT(-37.4)PS(-6.81)PLS(6.81)GPGGS(-11.2)S(-11.2)LLEK	20	3	1.5512
O14686;O14686-3	3207;3210	O14686	O14686	Histone-lysine N-methyltransferase 2D	KMT2D	>sp|O14686|KMT2D_HUMAN Histone-lysine N-methyltransferase 2D OS=Homo sapiens GN=KMT2D PE=1 SV=2;>sp|O14686-3|KMT2D_HUMAN Isoform 3 of Histone-lysine N-methyltransferase 2D OS=Homo sapiens GN=KMT2D	0.352728	0	1.8116e-06	76.161	54.212		S	PAHLLTPSPLSGPGGSSLLEKFELESGALTL	X;X;X;X;X;X;X;X;X;X;X;X;X;X;X;Phospho (STY);X;X;X;X;X;X;X;X;X;X;X;X;X;X;X	PPPPPPPPPPPPPPPPPPPPPXXXXXXXXXX	ASFGATGGPPAHLLT(0.989)PS(0.21)PLS(0.353)GPGGS(0.353)S(0.095)LLEK	AS(-58.74)FGAT(-47.4)GGPPAHLLT(18.95)PS(-2.4)PLS(0)GPGGS(0)S(-5.71)LLEK	25	3	-0.16347
O14686;O14686-3	4849;4852	O14686	O14686	Histone-lysine N-methyltransferase 2D	KMT2D	>sp|O14686|KMT2D_HUMAN Histone-lysine N-methyltransferase 2D OS=Homo sapiens GN=KMT2D PE=1 SV=2;>sp|O14686-3|KMT2D_HUMAN Isoform 3 of Histone-lysine N-methyltransferase 2D OS=Homo sapiens GN=KMT2D	0.998927	29.6895	0.00123944	224.67	145.18	1	S	EAEGPGGKEKGLEGKSPDTGPDWLKQFDAVL	X;X;X;X;X;X;X;X;X;X;X;X;X;X;X;Phospho (STY);X;X;X;X;X;X;X;X;X;X;X;X;X;X;X	XXXXXXXXXXPPPPPPPPPPPPPPPXXXXXX	GLEGKS(0.999)PDT(0.001)GPDWLK	GLEGKS(29.69)PDT(-29.69)GPDWLK	6	3	0.18791
O14686;O14686-3	42;42	O14686	O14686	Histone-lysine N-methyltransferase 2D	KMT2D	>sp|O14686|KMT2D_HUMAN Histone-lysine N-methyltransferase 2D OS=Homo sapiens GN=KMT2D PE=1 SV=2;>sp|O14686-3|KMT2D_HUMAN Isoform 3 of Histone-lysine N-methyltransferase 2D OS=Homo sapiens GN=KMT2D	0.498807	4.75096	1.44446e-37	117.97	94.668		S	SATESDLPNPHVGEVSVLSSGSPRLQETPQD	X;X;X;X;X;X;X;X;X;X;X;X;X;X;X;Phospho (STY);X;X;X;X;X;X;X;X;X;X;X;X;X;X;X	PPPPPPPPPPPPPPPPPPPPPPPPXXXXXXX	LAGEDKDSEPAADGPAASEDPSATESDLPNPHVGEVS(0.499)VLS(0.167)S(0.167)GS(0.167)PR	LAGEDKDS(-117.67)EPAADGPAAS(-77.97)EDPS(-46.85)AT(-46.85)ES(-41.53)DLPNPHVGEVS(4.75)VLS(-4.75)S(-4.75)GS(-4.75)PR	37	4	-0.091677
O14686;O14686-3	45;45	O14686	O14686	Histone-lysine N-methyltransferase 2D	KMT2D	>sp|O14686|KMT2D_HUMAN Histone-lysine N-methyltransferase 2D OS=Homo sapiens GN=KMT2D PE=1 SV=2;>sp|O14686-3|KMT2D_HUMAN Isoform 3 of Histone-lysine N-methyltransferase 2D OS=Homo sapiens GN=KMT2D	0.262005	0	5.79967e-12	74.08	62.946		S	ESDLPNPHVGEVSVLSSGSPRLQETPQDCSG	X;X;X;X;X;X;X;X;X;X;X;X;X;X;X;X;X;X;X;X;X;X;X;X;X;X;X;X;X;X;X	XXXXXXXXXXXXXXXXXXXXXXXXXXXXXXX	LAGEDKDSEPAADGPAASEDPSAT(0.001)ES(0.003)DLPNPHVGEVS(0.262)VLS(0.262)S(0.262)GS(0.21)PR	LAGEDKDS(-73.86)EPAADGPAAS(-54.24)EDPS(-29.42)AT(-25.47)ES(-20.19)DLPNPHVGEVS(0)VLS(0)S(0)GS(-0.95)PR	40	4	-0.4131
O14686;O14686-3	46;46	O14686	O14686	Histone-lysine N-methyltransferase 2D	KMT2D	>sp|O14686|KMT2D_HUMAN Histone-lysine N-methyltransferase 2D OS=Homo sapiens GN=KMT2D PE=1 SV=2;>sp|O14686-3|KMT2D_HUMAN Isoform 3 of Histone-lysine N-methyltransferase 2D OS=Homo sapiens GN=KMT2D	0.262005	0	5.79967e-12	74.08	62.946		S	SDLPNPHVGEVSVLSSGSPRLQETPQDCSGG	X;X;X;X;X;X;X;X;X;X;X;X;X;X;X;X;X;X;X;X;X;X;X;X;X;X;X;X;X;X;X	XXXXXXXXXXXXXXXXXXXXXXXXXXXXXXX	LAGEDKDSEPAADGPAASEDPSAT(0.001)ES(0.003)DLPNPHVGEVS(0.262)VLS(0.262)S(0.262)GS(0.21)PR	LAGEDKDS(-73.86)EPAADGPAAS(-54.24)EDPS(-29.42)AT(-25.47)ES(-20.19)DLPNPHVGEVS(0)VLS(0)S(0)GS(-0.95)PR	41	4	-0.4131
O14686;O14686-3	1671;1671	O14686	O14686	Histone-lysine N-methyltransferase 2D	KMT2D	>sp|O14686|KMT2D_HUMAN Histone-lysine N-methyltransferase 2D OS=Homo sapiens GN=KMT2D PE=1 SV=2;>sp|O14686-3|KMT2D_HUMAN Isoform 3 of Histone-lysine N-methyltransferase 2D OS=Homo sapiens GN=KMT2D	0.999974	47.3447	0.000486482	67.902	37.413	1	S	GVEHMECEIKLEGPVSPDVEPGKEETEESKK	X;X;X;X;X;X;X;X;X;X;X;X;X;X;X;Phospho (STY);X;X;X;X;X;X;X;X;X;X;X;X;X;X;X	XXXXXXXXXXPPPPPPPPPPPPPPPPPPPPX	LEGPVS(1)PDVEPGKEETEESK	LEGPVS(47.34)PDVEPGKEET(-47.34)EES(-51.25)K	6	3	-1.5189															0.77381			0.7336	0.90396		0.64467	0.88123	0.63545		0.87791			0.15368
O14686;O14686-3	2640;2643	O14686	O14686	Histone-lysine N-methyltransferase 2D	KMT2D	>sp|O14686|KMT2D_HUMAN Histone-lysine N-methyltransferase 2D OS=Homo sapiens GN=KMT2D PE=1 SV=2;>sp|O14686-3|KMT2D_HUMAN Isoform 3 of Histone-lysine N-methyltransferase 2D OS=Homo sapiens GN=KMT2D	0.948301	12.6347	0.000221951	106.26	46.891	1	S	LPYLSHGASQRSGITSPVEKREDPGTGMGSS	X;X;X;X;X;X;X;X;X;X;X;X;X;X;X;Phospho (STY);X;X;X;X;X;X;X;X;X;X;X;X;X;X;X	XXXXXXXXXXXPPPPPPPPPXXXXXXXXXXX	SGIT(0.052)S(0.948)PVEK	S(-67.08)GIT(-12.63)S(12.63)PVEK	5	2	-0.18868
O14686;O14686-3	3986;3989	O14686	O14686	Histone-lysine N-methyltransferase 2D	KMT2D	>sp|O14686|KMT2D_HUMAN Histone-lysine N-methyltransferase 2D OS=Homo sapiens GN=KMT2D PE=1 SV=2;>sp|O14686-3|KMT2D_HUMAN Isoform 3 of Histone-lysine N-methyltransferase 2D OS=Homo sapiens GN=KMT2D	0.759955	5.00495	0.00406026	51.524	33.208	1	S	QQQQMGLLNQSRTLLSPQQQQQQQVALGPGM	X;X;X;X;X;X;X;X;X;X;X;X;X;X;X;Phospho (STY);X;X;X;X;X;X;X;X;X;X;X;X;X;X;X	XXXXXXXXXXXXPPPPPPPPPPPPPPPPPPP	T(0.24)LLS(0.76)PQQQQQQQVALGPGMPAK	T(-5)LLS(5)PQQQQQQQVALGPGMPAK	4	3	0.10638
O14686;O14686-3	3837;3840	O14686	O14686	Histone-lysine N-methyltransferase 2D	KMT2D	>sp|O14686|KMT2D_HUMAN Histone-lysine N-methyltransferase 2D OS=Homo sapiens GN=KMT2D PE=1 SV=2;>sp|O14686-3|KMT2D_HUMAN Isoform 3 of Histone-lysine N-methyltransferase 2D OS=Homo sapiens GN=KMT2D	0.999941	42.327	8.93244e-06	244.27	188.24	1	S	GPHRQVLMTQSRVLSSPQLAQQGQGLMGHRL	X;X;X;X;X;X;X;X;X;X;X;X;X;X;X;Phospho (STY);X;X;X;X;X;X;X;X;X;X;X;X;X;X;X	XXXXXXXXXXXXPPPPPPPPPPPPPPPPPPX	VLSS(1)PQLAQQGQGLMGHR	VLS(-42.33)S(42.33)PQLAQQGQGLMGHR	4	3	-0.1462	0.87253	0.6096		0.60197	0.41564	0.58737	0.43255								0.83632	0.87596	0.50156	0.32303		0.57771	0.54099	0.63596	0.4523	0.34709
O14733;O14733-4;O14733-3;O14733-2	407;414;423;450	O14733	O14733	Dual specificity mitogen-activated protein kinase kinase 7	MAP2K7	>sp|O14733|MP2K7_HUMAN Dual specificity mitogen-activated protein kinase kinase 7 OS=Homo sapiens GN=MAP2K7 PE=1 SV=2;>sp|O14733-4|MP2K7_HUMAN Isoform 4 of Dual specificity mitogen-activated protein kinase kinase 7 OS=Homo sapiens GN=MAP2K7;>sp|O14733-3|MP	0.425013	1.80014	0.000654146	69.485	51.92		S	SWFKDVMAKTESPRTSGVLSQPHLPFFR___	X;X;X;X;X;X;X;X;X;X;X;X;X;X;X;Phospho (STY);X;X;X;X;X;X;X;X;X;X;X;X;X;X;X	XXXXXXXXXPPPPPPPPPPPPPPPPPPPXXX	T(0.001)ES(0.281)PRT(0.281)S(0.425)GVLS(0.013)QPHLPFFR	T(-28.69)ES(-1.8)PRT(-1.8)S(1.8)GVLS(-15.2)QPHLPFFR	7	3	0.20222
O14745;O14745-2	280;124	O14745	O14745	Na(+)/H(+) exchange regulatory cofactor NHE-RF1	SLC9A3R1	>sp|O14745|NHRF1_HUMAN Na(+)/H(+) exchange regulatory cofactor NHE-RF1 OS=Homo sapiens GN=SLC9A3R1 PE=1 SV=4;>sp|O14745-2|NHRF1_HUMAN Isoform 2 of Na(+)/H(+) exchange regulatory cofactor NHE-RF1 OS=Homo sapiens GN=SLC9A3R1	1	49.5587	4.7116e-06	333.07	267.6	1;2	S	QKENSREALAEAALESPRPALVRSASSDTSE	X;X;X;X;Phospho (STY);X;X;X;X;X;X;X;X;X;X;Phospho (STY);X;X;X;X;X;X;X;Phospho (STY);X;Phospho (STY);Phospho (STY);X;X;X;X	XXPPPPPPPPPPPPPPPPPPPPPXXXXXXXX	ENS(1)REALAEAALES(1)PRPALVR	ENS(49.56)REALAEAALES(49.56)PRPALVR	14	3	0.10226	0.84092	0.47308	0.50866	1.1826	0.64788	0.80641	1.1708	0.68525	0.62947	0.63196	0.44987	0.3322	0.28194	0.20975	0.80404	0.58638	0.69393	0.65407	0.70497	0.68465	0.57002	0.62628	0.64403	0.511	0.69915	0.75579	0.48267	0.16131
O14745	46	O14745	O14745	Na(+)/H(+) exchange regulatory cofactor NHE-RF1	SLC9A3R1	>sp|O14745|NHRF1_HUMAN Na(+)/H(+) exchange regulatory cofactor NHE-RF1 OS=Homo sapiens GN=SLC9A3R1 PE=1 SV=4	1	98.3681	4.31743e-05	119.39	74.539	1	S	EKGKLGQYIRLVEPGSPAEKAGLLAGDRLVE	X;X;X;X;X;X;X;X;X;X;X;X;X;X;X;Phospho (STY);X;X;X;X;X;X;X;X;X;X;X;X;X;X;X	XXXXPPPPPPPPPPPPPPPPXXXXXXXXXXX	LVEPGS(1)PAEK	LVEPGS(98.37)PAEK	6	2	0.27849		0.59814		0.61948	0.57959	0.7332	0.68136		0.51869								0.40806		0.61217	0.49743	0.59368		0.69944	0.52928	0.71706	0.29035	0.27818	0.14351
O14745;O14745-2	290;134	O14745	O14745	Na(+)/H(+) exchange regulatory cofactor NHE-RF1	SLC9A3R1	>sp|O14745|NHRF1_HUMAN Na(+)/H(+) exchange regulatory cofactor NHE-RF1 OS=Homo sapiens GN=SLC9A3R1 PE=1 SV=4;>sp|O14745-2|NHRF1_HUMAN Isoform 2 of Na(+)/H(+) exchange regulatory cofactor NHE-RF1 OS=Homo sapiens GN=SLC9A3R1	0.824473	6.83291	4.35675e-64	212.06	173.93	1	S	EAALESPRPALVRSASSDTSEELNSQDSPPK	X;X;X;X;X;Phospho (STY);X;X;X;X;X;X;X;X;X;Phospho (STY);X;X;X;X;X;X;X;X;X;X;X;X;X;X;X	XXXXXXXXXXXXXPPPPPPPPPPPPPPPPPP	S(0.001)AS(0.824)S(0.171)DT(0.003)SEELNSQDSPPK	S(-28.8)AS(6.83)S(-6.83)DT(-23.74)S(-57.98)EELNS(-125.62)QDS(-184.42)PPK	3	2	-0.021395	1.1587	0.79605	0.3214		0.51902	0.61018	0.60228	0.60798	0.55276	0.6301	0.55408	0.55763		0.77519
O14745;O14745-2	291;135	O14745	O14745	Na(+)/H(+) exchange regulatory cofactor NHE-RF1	SLC9A3R1	>sp|O14745|NHRF1_HUMAN Na(+)/H(+) exchange regulatory cofactor NHE-RF1 OS=Homo sapiens GN=SLC9A3R1 PE=1 SV=4;>sp|O14745-2|NHRF1_HUMAN Isoform 2 of Na(+)/H(+) exchange regulatory cofactor NHE-RF1 OS=Homo sapiens GN=SLC9A3R1	0.664887	3.08294	8.1617e-28	173.45	146.95	1	S	AALESPRPALVRSASSDTSEELNSQDSPPKQ	X;X;X;X;Phospho (STY);X;X;X;X;X;X;X;X;X;X;Phospho (STY);X;X;X;X;X;X;X;X;X;X;X;X;X;X;X	XXXXXXXXXXXXPPPPPPPPPPPPPPPPPPX	S(0.006)AS(0.327)S(0.665)DT(0.002)SEELNSQDSPPK	S(-20.82)AS(-3.08)S(3.08)DT(-24.27)S(-35.41)EELNS(-102.02)QDS(-153.88)PPK	4	2	0.39761
O14745;O14745-2	186;30	O14745	O14745	Na(+)/H(+) exchange regulatory cofactor NHE-RF1	SLC9A3R1	>sp|O14745|NHRF1_HUMAN Na(+)/H(+) exchange regulatory cofactor NHE-RF1 OS=Homo sapiens GN=SLC9A3R1 PE=1 SV=4;>sp|O14745-2|NHRF1_HUMAN Isoform 2 of Na(+)/H(+) exchange regulatory cofactor NHE-RF1 OS=Homo sapiens GN=SLC9A3R1	0.999834	37.8167	5.58099e-05	101.43	72.302	1	S	DKSKPGQFIRSVDPDSPAEASGLRAQDRIVE	X;X;X;X;X;X;X;X;X;X;X;X;X;X;X;Phospho (STY);X;X;X;X;X;X;X;X;X;X;X;X;X;X;X	XXXXXXXXXXPPPPPPPPPPPPPPXXXXXXX	SVDPDS(1)PAEASGLR	S(-65.62)VDPDS(37.82)PAEAS(-37.82)GLR	6	2	-1.3598
O14757;O14757-2;O14757-3	296;202;296	O14757	O14757	Serine/threonine-protein kinase Chk1	CHEK1	>sp|O14757|CHK1_HUMAN Serine/threonine-protein kinase Chk1 OS=Homo sapiens GN=CHEK1 PE=1 SV=2;>sp|O14757-2|CHK1_HUMAN Isoform 2 of Serine/threonine-protein kinase Chk1 OS=Homo sapiens GN=CHEK1;>sp|O14757-3|CHK1_HUMAN Isoform 3 of Serine/threonine-protein k	0.758826	5.00174	0.000836941	68.411	8.1039	1	S	GGVSESPSGFSKHIQSNLDFSPVNSASSEEN	X;X;X;Phospho (STY);X;Phospho (STY);X;Phospho (STY);X;X;X;X;X;X;X;Phospho (STY);X;X;X;X;X;X;X;X;X;X;X;X;X;X;X	XXXXXXXXXXXXPPPPPPPPPPPPPPPPPPP	HIQS(0.759)NLDFS(0.24)PVNS(0.001)ASSEENVK	HIQS(5)NLDFS(-5)PVNS(-31.06)AS(-33.27)S(-33.27)EENVK	4	3	0.18625																				0.86686
O14757;O14757-2;O14757-3	301;207;301	O14757	O14757	Serine/threonine-protein kinase Chk1	CHEK1	>sp|O14757|CHK1_HUMAN Serine/threonine-protein kinase Chk1 OS=Homo sapiens GN=CHEK1 PE=1 SV=2;>sp|O14757-2|CHK1_HUMAN Isoform 2 of Serine/threonine-protein kinase Chk1 OS=Homo sapiens GN=CHEK1;>sp|O14757-3|CHK1_HUMAN Isoform 3 of Serine/threonine-protein k	0.999239	33.7491	9.37979e-06	83.411	68.361	1	S	SPSGFSKHIQSNLDFSPVNSASSEENVKYSS	Phospho (STY);X;Phospho (STY);X;X;X;X;X;X;X;X;X;X;X;X;Phospho (STY);X;X;X;X;X;X;X;X;X;X;X;X;X;X;X	XXXXXXXPPPPPPPPPPPPPPPPPPPPPXXX	HIQSNLDFS(0.999)PVNSASSEENVK	HIQS(-33.75)NLDFS(33.75)PVNS(-34.84)AS(-50.86)S(-54.25)EENVK	9	3	-0.38523						0.66663	0.69442	0.52666							0.29655	0.75782	0.73253	0.75064				0.55791
O14757;O14757-2;O14757-3	331;237;331	O14757	O14757	Serine/threonine-protein kinase Chk1	CHEK1	>sp|O14757|CHK1_HUMAN Serine/threonine-protein kinase Chk1 OS=Homo sapiens GN=CHEK1 PE=1 SV=2;>sp|O14757-2|CHK1_HUMAN Isoform 2 of Serine/threonine-protein kinase Chk1 OS=Homo sapiens GN=CHEK1;>sp|O14757-3|CHK1_HUMAN Isoform 3 of Serine/threonine-protein k	0.939292	12.1765	1.27394e-38	214.83	167.53	1	S	SSQPEPRTGLSLWDTSPSYIDKLVQGISFSQ	X;X;X;X;X;X;X;X;X;X;X;X;X;X;X;Phospho (STY);X;X;X;X;X;X;X;X;X;X;X;X;X;X;X	XXXXXXXPPPPPPPPPPPPPPPXXXXXXXXX	TGLSLWDT(0.057)S(0.939)PS(0.004)YIDK	T(-127.92)GLS(-84.63)LWDT(-12.18)S(12.18)PS(-23.95)Y(-46.29)IDK	9	3	0.48209		0.78064		0.59808
O14757;O14757-2;O14757-3	333;239;333	O14757	O14757	Serine/threonine-protein kinase Chk1	CHEK1	>sp|O14757|CHK1_HUMAN Serine/threonine-protein kinase Chk1 OS=Homo sapiens GN=CHEK1 PE=1 SV=2;>sp|O14757-2|CHK1_HUMAN Isoform 2 of Serine/threonine-protein kinase Chk1 OS=Homo sapiens GN=CHEK1;>sp|O14757-3|CHK1_HUMAN Isoform 3 of Serine/threonine-protein k	0.992329	24.1407	0.00128545	196.16	111.42	1	S	QPEPRTGLSLWDTSPSYIDKLVQGISFSQPT	X;X;X;X;X;X;X;X;X;X;X;X;X;X;X;Phospho (STY);X;X;X;X;X;X;X;X;X;X;X;X;X;X;X	XXXXXPPPPPPPPPPPPPPPXXXXXXXXXXX	TGLSLWDTS(0.004)PS(0.992)Y(0.004)IDK	T(-155.62)GLS(-133.37)LWDT(-46.67)S(-24.14)PS(24.14)Y(-24.14)IDK	11	3	-0.29308
O14757;O14757-2;O14757-3	284;190;284	O14757	O14757	Serine/threonine-protein kinase Chk1	CHEK1	>sp|O14757|CHK1_HUMAN Serine/threonine-protein kinase Chk1 OS=Homo sapiens GN=CHEK1 PE=1 SV=2;>sp|O14757-2|CHK1_HUMAN Isoform 2 of Serine/threonine-protein kinase Chk1 OS=Homo sapiens GN=CHEK1;>sp|O14757-3|CHK1_HUMAN Isoform 3 of Serine/threonine-protein k	0.748665	4.86655	4.17563e-05	105.92	77.371	1	S	LKKGAKRPRVTSGGVSESPSGFSKHIQSNLD	X;X;X;X;X;X;X;X;X;X;X;X;X;X;X;Phospho (STY);X;X;X;X;X;X;X;X;X;X;X;Phospho (STY);X;X;X	XXXXXXXXXPPPPPPPPPPPPPPPXXXXXXX	VTSGGVS(0.749)ES(0.244)PS(0.007)GFSK	VT(-71.25)S(-58.99)GGVS(4.87)ES(-4.87)PS(-20.18)GFS(-45.94)K	7	2	-0.21573
O14757;O14757-2;O14757-3	286;192;286	O14757	O14757	Serine/threonine-protein kinase Chk1	CHEK1	>sp|O14757|CHK1_HUMAN Serine/threonine-protein kinase Chk1 OS=Homo sapiens GN=CHEK1 PE=1 SV=2;>sp|O14757-2|CHK1_HUMAN Isoform 2 of Serine/threonine-protein kinase Chk1 OS=Homo sapiens GN=CHEK1;>sp|O14757-3|CHK1_HUMAN Isoform 3 of Serine/threonine-protein k	0.926479	12.9683	5.34472e-06	125.03	105.75	1	S	KGAKRPRVTSGGVSESPSGFSKHIQSNLDFS	X;X;X;X;X;X;X;X;X;X;X;X;X;X;X;Phospho (STY);X;X;X;X;X;X;X;X;X;Phospho (STY);X;X;X;X;Phospho (STY)	XXXXXXXPPPPPPPPPPPPPPPXXXXXXXXX	VTS(0.002)GGVS(0.047)ES(0.926)PS(0.025)GFSK	VT(-61.13)S(-27.77)GGVS(-12.97)ES(12.97)PS(-15.66)GFS(-45.57)K	9	2	0.029392
O14757;O14757-2;O14757-3	288;194;288	O14757	O14757	Serine/threonine-protein kinase Chk1	CHEK1	>sp|O14757|CHK1_HUMAN Serine/threonine-protein kinase Chk1 OS=Homo sapiens GN=CHEK1 PE=1 SV=2;>sp|O14757-2|CHK1_HUMAN Isoform 2 of Serine/threonine-protein kinase Chk1 OS=Homo sapiens GN=CHEK1;>sp|O14757-3|CHK1_HUMAN Isoform 3 of Serine/threonine-protein k	0.497186	0.99464	0.000505021	81.357	62.183		S	AKRPRVTSGGVSESPSGFSKHIQSNLDFSPV	X;X;X;X;X;X;X;X;X;X;X;X;X;X;X;Phospho (STY);X;X;X;X;X;X;X;Phospho (STY);X;X;X;X;Phospho (STY);X;X	XXXXXPPPPPPPPPPPPPPPXXXXXXXXXXX	VTSGGVS(0.106)ES(0.395)PS(0.497)GFS(0.001)K	VT(-63.2)S(-51.54)GGVS(-6.7)ES(-0.99)PS(0.99)GFS(-26.62)K	11	2	0.072578
O14776;O14776-2	833;812	O14776	O14776	Transcription elongation regulator 1	TCERG1	>sp|O14776|TCRG1_HUMAN Transcription elongation regulator 1 OS=Homo sapiens GN=TCERG1 PE=1 SV=2;>sp|O14776-2|TCRG1_HUMAN Isoform 2 of Transcription elongation regulator 1 OS=Homo sapiens GN=TCERG1	0.999933	43.3849	0.000583811	251.33	184.35	1	S	KDKVESDPRYKAVDSSSMREDLFKQYIEKIA	X;X;X;X;X;X;X;X;X;X;X;X;X;X;X;Phospho (STY);X;X;X;X;X;X;X;X;X;X;X;X;X;X;X	XXXXXXXXXXXPPPPPPPPPPPPPXXXXXXX	AVDSS(1)SMREDLFK	AVDS(-43.38)S(43.38)S(-46.71)MREDLFK	5	3	0.24861		0.81285
O14777	62	O14777	O14777	Kinetochore protein NDC80 homolog	NDC80	>sp|O14777|NDC80_HUMAN Kinetochore protein NDC80 homolog OS=Homo sapiens GN=NDC80 PE=1 SV=1	0.838545	7.37771	0.00113781	78.249	78.249	2	S	KPTSERKVSLFGKRTSGHGSRNSQLGIFSSS	X;X;X;Phospho (STY);X;X;X;X;X;X;X;X;X;X;X;Phospho (STY);X;X;X;X;X;X;Phospho (STY);X;X;X;X;X;X;X;X	XXXXXXXXXXXXXPPPPPPPPPPPPPPPPPP	RT(0.155)S(0.839)GHGS(0.043)RNS(0.806)QLGIFS(0.15)S(0.007)S(0.002)EK	RT(-7.38)S(7.38)GHGS(-13.41)RNS(7.38)QLGIFS(-7.38)S(-20.89)S(-27.5)EK	3	4	1.0751
O14777	69	O14777	O14777	Kinetochore protein NDC80 homolog	NDC80	>sp|O14777|NDC80_HUMAN Kinetochore protein NDC80 homolog OS=Homo sapiens GN=NDC80 PE=1 SV=1	0.993108	25.3529	0.00113781	78.249	78.249	2	S	VSLFGKRTSGHGSRNSQLGIFSSSEKIKDPR	X;X;X;X;X;X;X;X;Phospho (STY);X;X;X;X;X;X;Phospho (STY);X;X;X;X;X;X;X;X;X;X;X;X;X;X;X	XXXXXXPPPPPPPPPPPPPPPPPPPPXXXXX	RT(0.146)S(0.813)GHGS(0.042)RNS(0.993)QLGIFS(0.003)S(0.003)SEK	RT(-7.46)S(7.46)GHGS(-13.01)RNS(25.35)QLGIFS(-25.35)S(-25.35)S(-45.32)EK	10	4	-0.084073
O14795;O14795-2	366;366	O14795	O14795	Protein unc-13 homolog B	UNC13B	>sp|O14795|UN13B_HUMAN Protein unc-13 homolog B OS=Homo sapiens GN=UNC13B PE=1 SV=2;>sp|O14795-2|UN13B_HUMAN Isoform 2 of Protein unc-13 homolog B OS=Homo sapiens GN=UNC13B	0.838822	7.22582	2.29107e-15	133.98	98.847	1	S	DHFLGPQESFPEENASSPFTQARAHWIRAVT	X;X;X;X;X;X;X;X;X;X;X;X;X;X;X;Phospho (STY);X;X;X;X;X;X;X;X;X;X;X;X;X;X;X	PPPPPPPPPPPPPPPPPPPPPPPXXXXXXXX	DHFLGPQESFPEENAS(0.839)S(0.159)PFT(0.002)QAR	DHFLGPQES(-84.66)FPEENAS(7.23)S(-7.23)PFT(-25.64)QAR	16	3	0.07531															0.77679
O14795;O14795-2	367;367	O14795	O14795	Protein unc-13 homolog B	UNC13B	>sp|O14795|UN13B_HUMAN Protein unc-13 homolog B OS=Homo sapiens GN=UNC13B PE=1 SV=2;>sp|O14795-2|UN13B_HUMAN Isoform 2 of Protein unc-13 homolog B OS=Homo sapiens GN=UNC13B	0.989443	21.6233	1.28416e-34	167.35	137.51	1	S	HFLGPQESFPEENASSPFTQARAHWIRAVTK	X;X;X;X;X;X;X;X;X;X;X;X;X;X;X;Phospho (STY);X;X;X;X;X;X;X;X;X;X;X;X;X;X;X	PPPPPPPPPPPPPPPPPPPPPPXXXXXXXXX	DHFLGPQESFPEENAS(0.007)S(0.989)PFT(0.004)QAR	DHFLGPQES(-132.18)FPEENAS(-21.62)S(21.62)PFT(-24.22)QAR	17	3	-0.48193		0.70263						0.73559								0.82173	0.78294		0.59847	0.83461			0.84677		0.63599
O14795;O14795-2;Q9UPW8	917;917;993	O14795	O14795	Protein unc-13 homolog B;Protein unc-13 homolog A	UNC13B;UNC13A	>sp|O14795|UN13B_HUMAN Protein unc-13 homolog B OS=Homo sapiens GN=UNC13B PE=1 SV=2;>sp|O14795-2|UN13B_HUMAN Isoform 2 of Protein unc-13 homolog B OS=Homo sapiens GN=UNC13B;>sp|Q9UPW8|UN13A_HUMAN Protein unc-13 homolog A OS=Homo sapiens GN=UNC13A PE=2 SV=4	0.928833	11.1566	0.00164214	136.7	73.518	1	S	FFRMKVQELQSPPRASQVVKDCVKACLNSTY	X;X;X;X;X;X;X;X;X;X;X;X;X;X;X;Phospho (STY);X;X;X;X;X;X;X;X;X;X;X;X;X;X;X	XXXXXPPPPPPPPPPPPPPPXXXXXXXXXXX	VQELQS(0.071)PPRAS(0.929)QVVK	VQELQS(-11.16)PPRAS(11.16)QVVK	11	3	0.18738
O14818;Q8TAA3;Q8TAA3-2;O14818-4;Q8TAA3-5	11;13;13;11;13	O14818	O14818	Proteasome subunit alpha type-7;Proteasome subunit alpha type-7-like	PSMA7;PSMA8	>sp|O14818|PSA7_HUMAN Proteasome subunit alpha type-7 OS=Homo sapiens GN=PSMA7 PE=1 SV=1;>sp|Q8TAA3|PSA7L_HUMAN Proteasome subunit alpha type-7-like OS=Homo sapiens GN=PSMA8 PE=2 SV=3;>sp|Q8TAA3-2|PSA7L_HUMAN Isoform 2 of Proteasome subunit alpha type-7-li	0.999996	54.4684	1.21075e-41	177	146.96	1	S	_____MSYDRAITVFSPDGHLFQVEYAQEAV	X;X;X;X;X;X;X;X;X;X;X;X;X;X;X;Phospho (STY);X;X;X;X;X;X;X;X;X;X;X;X;X;X;X	XXXXXXXXXXPPPPPPPPPPPPPPPPPPPPP	AITVFS(1)PDGHLFQVEYAQEAVK	AIT(-54.47)VFS(54.47)PDGHLFQVEY(-95.31)AQEAVK	6	3	0.07043
O14828;O14828-2	76;50	O14828	O14828	Secretory carrier-associated membrane protein 3	SCAMP3	>sp|O14828|SCAM3_HUMAN Secretory carrier-associated membrane protein 3 OS=Homo sapiens GN=SCAMP3 PE=1 SV=3;>sp|O14828-2|SCAM3_HUMAN Isoform 2 of Secretory carrier-associated membrane protein 3 OS=Homo sapiens GN=SCAMP3	0.999817	37.3734	0.00441853	108.46	68.109	1	S	LPPPSAPSLQPSRKLSPTEPKNYGSYSTQAS	X;X;X;X;X;X;X;X;X;X;X;X;X;X;X;Phospho (STY);X;X;X;X;X;X;X;X;X;X;X;X;X;X;X	XXXXXXXXXXXXXPPPPPPPPXXXXXXXXXX	KLS(1)PTEPK	KLS(37.37)PT(-37.37)EPK	3	2	0.067931				0.9329	0.71686	0.96635	1.0118				0.78353	0.63358		0.70968	0.75919	0.727	0.69446	0.64253	0.66926	0.67929	0.65039	0.68195	0.71741	0.62872	0.76605	0.4959	0.63115	0.52115
O14874;O14874-2;O14874-3	31;31;31	O14874	O14874	[3-methyl-2-oxobutanoate dehydrogenase [lipoamide]] kinase, mitochondrial	BCKDK	>sp|O14874|BCKD_HUMAN [3-methyl-2-oxobutanoate dehydrogenase [lipoamide]] kinase, mitochondrial OS=Homo sapiens GN=BCKDK PE=1 SV=2;>sp|O14874-2|BCKD_HUMAN Isoform 2 of [3-methyl-2-oxobutanoate dehydrogenase [lipoamide]] kinase, mitochondrial OS=Homo sapien	0.997761	26.4906	0.000581799	249.93	214.39	1	S	PLRPLLGPALALRARSTSATDTHHVEMARER	X;X;X;X;X;X;X;X;X;X;X;X;X;X;X;Phospho (STY);X;X;X;X;X;X;X;X;X;X;X;X;X;X;X	XXXXXXXXXXXXXXXPPPPPPPPPPPPPPXX	S(0.998)T(0.002)SATDTHHVEMAR	S(26.49)T(-26.49)S(-62.89)AT(-113.54)DT(-134.77)HHVEMAR	1	3	0.1088		0.95985			0.98892	0.72254	1.0929				1.0518		0.88795		0.84887	0.65154	0.52733			0.62235	0.64526	0.59548	0.46076	0.62424		0.74911	0.56194	0.87681
O14879	203	O14879	O14879	Interferon-induced protein with tetratricopeptide repeats 3	IFIT3	>sp|O14879|IFIT3_HUMAN Interferon-induced protein with tetratricopeptide repeats 3 OS=Homo sapiens GN=IFIT3 PE=1 SV=1	1	74.4476	4.66901e-12	161.2	114.22	1	S	EKQFSTDVLKQAIELSPDNQYVKVLLGLKLQ	X;X;X;X;X;X;X;X;X;X;X;X;X;X;X;Phospho (STY);X;X;X;X;X;X;X;X;X;X;X;X;X;X;X	XXXXXXXXXXPPPPPPPPPPPPPXXXXXXXX	QAIELS(1)PDNQYVK	QAIELS(74.45)PDNQY(-74.45)VK	6	2	1.0014		0.67733		0.77607	0.75887	1.1408		0.88473	0.85356	0.65931	0.57566		0.68253					1.0968
O14907	61	O14907	O14907	Tax1-binding protein 3	TAX1BP3	>sp|O14907|TX1B3_HUMAN Tax1-binding protein 3 OS=Homo sapiens GN=TAX1BP3 PE=1 SV=2	0.987106	19.2439	6.22531e-18	143.09	105.16	1	S	FSEDKTDKGIYVTRVSEGGPAEIAGLQIGDK	X;X;X;X;X;X;X;X;X;X;X;X;X;X;X;Phospho (STY);X;X;X;X;X;X;X;X;X;X;X;X;X;X;X	XXXXXXXXPPPPPPPPPPPPPPPPPPPPPPP	GIY(0.001)VT(0.012)RVS(0.987)EGGPAEIAGLQIGDK	GIY(-29.35)VT(-19.24)RVS(19.24)EGGPAEIAGLQIGDK	8	2	-0.39057	0.88797										0.7843			0.75026	0.6656		1.0557
O14908;O14908-2	232;135	O14908	O14908	PDZ domain-containing protein GIPC1	GIPC1	>sp|O14908|GIPC1_HUMAN PDZ domain-containing protein GIPC1 OS=Homo sapiens GN=GIPC1 PE=1 SV=2;>sp|O14908-2|GIPC1_HUMAN Isoform 2 of PDZ domain-containing protein GIPC1 OS=Homo sapiens GN=GIPC1	0.995055	23.0444	0.0013027	111.73	70.976	1	S	AFDMISQRSAGGRPGSGPQLGTGRGTLRLRS	X;X;X;X;X;X;X;X;X;X;X;X;X;X;X;Phospho (STY);X;X;X;X;X;X;X;X;X;X;X;X;X;X;X	XXXXXXXXPPPPPPPPPPPPPPPPXXXXXXX	SAGGRPGS(0.995)GPQLGT(0.005)GR	S(-50.6)AGGRPGS(23.04)GPQLGT(-23.04)GR	8	3	0.84451
O14920-2;O14920;O14920-4	670;672;613	O14920-2	O14920-2	Inhibitor of nuclear factor kappa-B kinase subunit beta	IKBKB	>sp|O14920-2|IKKB_HUMAN Isoform 2 of Inhibitor of nuclear factor kappa-B kinase subunit beta OS=Homo sapiens GN=IKBKB;>sp|O14920|IKKB_HUMAN Inhibitor of nuclear factor kappa-B kinase subunit beta OS=Homo sapiens GN=IKBKB PE=1 SV=1;>sp|O14920-4|IKKB_HUMAN I	0.999996	55.9072	5.20872e-05	269.95	217.35	1	S	LLKIACSKVRGPVSGSPDSMNASRLSQPGQL	X;X;X;X;X;X;X;X;X;X;X;X;X;X;X;Phospho (STY);X;X;X;Oxidation (M);X;X;X;X;X;X;X;X;X;X;X	XXXXXXXXPPPPPPPPPPPPPPPPXXXXXXX	VRGPVSGS(1)PDSMNASR	VRGPVS(-59.84)GS(55.91)PDS(-55.91)MNAS(-169.89)R	8	3	0.39403	0.97509	0.77961	0.69136	1.1375		1.2273					1.0258			0.93647	0.68108	0.72965	0.6599	0.65653	0.82031	0.61517	0.89306	0.60264	0.67704	0.81006	0.6502	0.73455	0.8225	0.75115
O14936-3;O14936-4;O14936;O14936-6;O14936-2	50;50;50;50;50	O14936-3	O14936-3	Peripheral plasma membrane protein CASK	CASK	>sp|O14936-3|CSKP_HUMAN Isoform 3 of Peripheral plasma membrane protein CASK OS=Homo sapiens GN=CASK;>sp|O14936-4|CSKP_HUMAN Isoform 4 of Peripheral plasma membrane protein CASK OS=Homo sapiens GN=CASK;>sp|O14936|CSKP_HUMAN Peripheral plasma membrane prote	0.721917	4.32783	6.31209e-05	109.48	76.16	1	S	GQQFAVKIVDVAKFTSSPGLSTEDLKREASI	X;X;X;X;X;X;X;X;X;X;X;X;X;X;X;Phospho (STY);X;X;X;X;X;X;X;X;X;X;X;X;X;X;X	XXXXXXXXXXXXXPPPPPPPPPPPPPXXXXX	FT(0.011)S(0.722)S(0.267)PGLSTEDLK	FT(-18.05)S(4.33)S(-4.33)PGLS(-37.5)T(-37.5)EDLK	3	2	0.17592				0.85697		1.1712			1.0258
O14936-3;O14936-4;O14936;O14936-6;O14936-2	51;51;51;51;51	O14936-3	O14936-3	Peripheral plasma membrane protein CASK	CASK	>sp|O14936-3|CSKP_HUMAN Isoform 3 of Peripheral plasma membrane protein CASK OS=Homo sapiens GN=CASK;>sp|O14936-4|CSKP_HUMAN Isoform 4 of Peripheral plasma membrane protein CASK OS=Homo sapiens GN=CASK;>sp|O14936|CSKP_HUMAN Peripheral plasma membrane prote	0.941826	12.8688	2.9136e-05	128.74	91.041	1	S	QQFAVKIVDVAKFTSSPGLSTEDLKREASIC	X;X;X;X;X;X;X;X;X;X;X;X;X;X;X;Phospho (STY);X;X;X;X;X;X;X;X;X;X;X;X;X;X;X	XXXXXXXXXXXXPPPPPPPPPPPPPXXXXXX	FT(0.001)S(0.049)S(0.942)PGLS(0.003)T(0.005)EDLK	FT(-29.6)S(-12.87)S(12.87)PGLS(-24.4)T(-22.69)EDLK	4	2	-0.029238																0.83383				0.96058	0.98607		0.93567		0.60169			0.69132
O14936-3;O14936-4;O14936;O14936-5;O14936-6;O14936-2	388;394;394;9;394;394	O14936-3	O14936-3	Peripheral plasma membrane protein CASK	CASK	>sp|O14936-3|CSKP_HUMAN Isoform 3 of Peripheral plasma membrane protein CASK OS=Homo sapiens GN=CASK;>sp|O14936-4|CSKP_HUMAN Isoform 4 of Peripheral plasma membrane protein CASK OS=Homo sapiens GN=CASK;>sp|O14936|CSKP_HUMAN Peripheral plasma membrane prote	0.873141	8.40151	0.00130819	179.5	103.91	1	S	HLHTLLDLYDKINTKSSPQIRNPPSDAVQRA	X;X;X;X;X;X;X;X;X;X;X;X;X;X;X;Phospho (STY);X;X;X;X;X;X;X;X;X;X;X;X;X;X;X	XXXXXXXXXXXXXXXPPPPPPPPPPPPPPPX	S(0.873)S(0.126)PQIRNPPS(0.001)DAVQR	S(8.4)S(-8.4)PQIRNPPS(-30.99)DAVQR	1	3	0.049434						0.92678	1.1526	0.79916	0.69296		0.60585	0.57801	0.88791		1.0084				0.39203				0.32727	0.18391		2.0391		1.355
O14936-3;O14936-4;O14936;O14936-5;O14936-6;O14936-2	389;395;395;10;395;395	O14936-3	O14936-3	Peripheral plasma membrane protein CASK	CASK	>sp|O14936-3|CSKP_HUMAN Isoform 3 of Peripheral plasma membrane protein CASK OS=Homo sapiens GN=CASK;>sp|O14936-4|CSKP_HUMAN Isoform 4 of Peripheral plasma membrane protein CASK OS=Homo sapiens GN=CASK;>sp|O14936|CSKP_HUMAN Peripheral plasma membrane prote	0.901982	9.63905	0.00137046	181.76	181.76	1	S	LHTLLDLYDKINTKSSPQIRNPPSDAVQRAK	X;X;X;X;X;X;X;X;X;X;X;X;X;X;X;Phospho (STY);X;X;X;X;X;X;X;X;X;X;X;X;X;X;X	XXXXXXXXXXXXXXPPPPPPPPPPPPPPPXX	S(0.098)S(0.902)PQIRNPPSDAVQR	S(-9.64)S(9.64)PQIRNPPS(-55.25)DAVQR	2	3	-0.054101				1.0174	0.65906	0.92678	1.1526	0.79916	0.69296	0.67671	0.60585	0.57801	0.88791	0.78639									0.32727	0.18391		2.0391
O14936-3;O14936-4;O14936-5	570;576;191	O14936-3	O14936-3	Peripheral plasma membrane protein CASK	CASK	>sp|O14936-3|CSKP_HUMAN Isoform 3 of Peripheral plasma membrane protein CASK OS=Homo sapiens GN=CASK;>sp|O14936-4|CSKP_HUMAN Isoform 4 of Peripheral plasma membrane protein CASK OS=Homo sapiens GN=CASK;>sp|O14936-5|CSKP_HUMAN Isoform 5 of Peripheral plasma	0.477384	0	0.00132332	90.397	65.93		S	GSITFKIVPSYRTQSSSCEDLPSTTQPKGRQ	X;X;X;X;X;X;X;X;X;X;X;X;X;X;X;Phospho (STY);X;X;X;X;X;X;X;X;X;X;X;X;X;X;X	XXXXXXXXXXXXPPPPPPPPPPPPPPPPXXX	TQS(0.045)S(0.477)S(0.477)CEDLPSTTQPK	T(-33.25)QS(-10.29)S(0)S(0)CEDLPS(-31.83)T(-46.16)T(-57.03)QPK	4	2	0.13764
O14936-3;O14936-4;O14936-5	571;577;192	O14936-3	O14936-3	Peripheral plasma membrane protein CASK	CASK	>sp|O14936-3|CSKP_HUMAN Isoform 3 of Peripheral plasma membrane protein CASK OS=Homo sapiens GN=CASK;>sp|O14936-4|CSKP_HUMAN Isoform 4 of Peripheral plasma membrane protein CASK OS=Homo sapiens GN=CASK;>sp|O14936-5|CSKP_HUMAN Isoform 5 of Peripheral plasma	0.810521	8.33598	0.00132332	90.397	65.93	1	S	SITFKIVPSYRTQSSSCEDLPSTTQPKGRQI	X;X;X;X;X;X;X;X;X;X;X;X;X;X;X;Phospho (STY);X;X;X;X;X;X;X;X;X;X;X;X;X;X;X	XXXXXXXXXXXPPPPPPPPPPPPPPPPXXXX	T(0.014)QS(0.056)S(0.119)S(0.811)CEDLPS(0.001)TTQPK	T(-17.63)QS(-11.62)S(-8.34)S(8.34)CEDLPS(-31.86)T(-35.87)T(-44.69)QPK	5	2	0.45212																	0.44723	0.60444	0.72372	0.58978		0.51286				0.62807
O14950;P19105;P24844;P24844-2	20;19;20;20	O14950	O14950	Myosin regulatory light chain 12B;Myosin regulatory light chain 12A;Myosin regulatory light polypeptide 9	MYL12B;MYL12A;MYL9	>sp|O14950|ML12B_HUMAN Myosin regulatory light chain 12B OS=Homo sapiens GN=MYL12B PE=1 SV=2;>sp|P19105|ML12A_HUMAN Myosin regulatory light chain 12A OS=Homo sapiens GN=MYL12A PE=1 SV=2;>sp|P24844|MYL9_HUMAN Myosin regulatory light polypeptide 9 OS=Homo sa	1	83.3652	3.90696e-78	250.38	222.21	1;2	S	KAKTKTTKKRPQRATSNVFAMFDQSQIQEFK	X;X;X;X;X;X;X;X;X;X;X;X;X;X;Phospho (STY);Phospho (STY);X;X;X;X;Oxidation (M);X;X;X;X;X;X;X;X;X;X	XXXXXXXXXPPPPPPPPPPPPPPPPPPPPPP	RPQRAT(1)S(1)NVFAMFDQSQIQEFK	RPQRAT(78.99)S(83.37)NVFAMFDQS(-78.99)QIQEFK	7	3	0.14707	0.90469	0.68806	0.52065	0.7437	0.64433	0.95731	0.72093	0.75179	0.92507	1.0336	0.86769	0.79147	0.86548	0.66593	1.1308	0.78347	0.73245	0.75736	0.76766	0.64336	0.64055	0.84554	0.92355	0.74442	1.0182	0.95638	1.1219	1.0532
O14964;O14964-2	240;240	O14964	O14964	Hepatocyte growth factor-regulated tyrosine kinase substrate	HGS	>sp|O14964|HGS_HUMAN Hepatocyte growth factor-regulated tyrosine kinase substrate OS=Homo sapiens GN=HGS PE=1 SV=1;>sp|O14964-2|HGS_HUMAN Isoform 2 of Hepatocyte growth factor-regulated tyrosine kinase substrate OS=Homo sapiens GN=HGS	0.855199	12.0341	0.000278737	58.712	44.557	1	S	GKATSTTELPPEYLTSPLSQQSQLPPKRDET	X;X;X;X;X;X;X;X;X;X;X;X;X;X;X;Phospho (STY);X;X;X;X;X;X;X;X;X;X;X;X;X;X;X	XXPPPPPPPPPPPPPPPPPPPPPPPPPXXXX	ATSTTELPPEY(0.001)LT(0.048)S(0.855)PLS(0.042)QQS(0.054)QLPPK	AT(-49.01)S(-45.69)T(-45.69)T(-45.69)ELPPEY(-28.95)LT(-12.54)S(12.03)PLS(-13.04)QQS(-12.03)QLPPK	14	3	0.047171																	0.75636	0.71702					0.7293				0.67266
O14964;O14964-2	243;243	O14964	O14964	Hepatocyte growth factor-regulated tyrosine kinase substrate	HGS	>sp|O14964|HGS_HUMAN Hepatocyte growth factor-regulated tyrosine kinase substrate OS=Homo sapiens GN=HGS PE=1 SV=1;>sp|O14964-2|HGS_HUMAN Isoform 2 of Hepatocyte growth factor-regulated tyrosine kinase substrate OS=Homo sapiens GN=HGS	0.674525	4.77086	0.00254923	46.569	26.994	1	S	TSTTELPPEYLTSPLSQQSQLPPKRDETALQ	X;X;X;X;X;X;X;X;X;X;X;X;X;X;X;Phospho (STY);X;X;X;X;X;X;X;X;X;X;X;X;X;X;X	PPPPPPPPPPPPPPPPPPPPPPPPXXXXXXX	ATSTTELPPEY(0.02)LT(0.069)S(0.225)PLS(0.675)QQS(0.011)QLPPK	AT(-36.47)S(-36.47)T(-36.47)T(-36.47)ELPPEY(-15.25)LT(-9.91)S(-4.77)PLS(4.77)QQS(-17.89)QLPPK	17	3	0.49381												0.39274
O14965	53	O14965	O14965	Aurora kinase A	AURKA	>sp|O14965|AURKA_HUMAN Aurora kinase A OS=Homo sapiens GN=AURKA PE=1 SV=2	0.967027	14.6769	0.000476386	142.19	109.71	1	S	PVNSGQAQRVLCPSNSSQRVPLQAQKLVSSH	X;X;X;X;X;X;X;X;X;X;X;X;X;X;X;Phospho (STY);X;X;X;X;X;X;X;X;X;X;X;X;X;X;X	XXXXXXXXXPPPPPPPPPPPPPPPPPXXXXX	VLCPSNS(0.967)S(0.033)QRVPLQAQK	VLCPS(-44.9)NS(14.68)S(-14.68)QRVPLQAQK	7	3	-0.17146
O14965	54	O14965	O14965	Aurora kinase A	AURKA	>sp|O14965|AURKA_HUMAN Aurora kinase A OS=Homo sapiens GN=AURKA PE=1 SV=2	0.871039	8.49318	0.000643572	135.29	99.992	1	S	VNSGQAQRVLCPSNSSQRVPLQAQKLVSSHK	X;X;X;X;X;X;X;X;X;X;X;X;X;X;X;Phospho (STY);X;X;X;X;X;X;X;X;X;X;X;X;X;X;X	XXXXXXXXPPPPPPPPPPPPPPPPPXXXXXX	VLCPS(0.006)NS(0.123)S(0.871)QRVPLQAQK	VLCPS(-21.82)NS(-8.49)S(8.49)QRVPLQAQK	8	3	0.29629
O14974;O14974-4;O14974-3;O14974-2;O14974-5	432;432;432;432;345	O14974	O14974	Protein phosphatase 1 regulatory subunit 12A	PPP1R12A	>sp|O14974|MYPT1_HUMAN Protein phosphatase 1 regulatory subunit 12A OS=Homo sapiens GN=PPP1R12A PE=1 SV=1;>sp|O14974-4|MYPT1_HUMAN Isoform 4 of Protein phosphatase 1 regulatory subunit 12A OS=Homo sapiens GN=PPP1R12A;>sp|O14974-3|MYPT1_HUMAN Isoform 3 of P	1	69.0132	0.00197752	234.04	134.37	1	S	TATKISPKEEERKDESPATWRLGLRKTGSYG	X;X;X;X;X;Phospho (STY);X;X;X;X;X;X;X;X;X;Phospho (STY);X;X;X;X;X;X;X;X;X;X;X;X;Phospho (STY);X;X	XXXXXXXXPPPPPPPPPPPPPXXXXXXXXXX	EEERKDES(1)PATWR	EEERKDES(69.01)PAT(-69.01)WR	8	3	0.57069
O14974;O14974-4;O14974-3;O14974-2;O14974-5	422;422;422;422;335	O14974	O14974	Protein phosphatase 1 regulatory subunit 12A	PPP1R12A	>sp|O14974|MYPT1_HUMAN Protein phosphatase 1 regulatory subunit 12A OS=Homo sapiens GN=PPP1R12A PE=1 SV=1;>sp|O14974-4|MYPT1_HUMAN Isoform 4 of Protein phosphatase 1 regulatory subunit 12A OS=Homo sapiens GN=PPP1R12A;>sp|O14974-3|MYPT1_HUMAN Isoform 3 of P	1	89.9358	0.00107974	196.52	160.98	1	S	PTSPIKKFPTTATKISPKEEERKDESPATWR	X;Phospho (STY);Phospho (STY);X;X;X;X;X;X;X;X;X;X;X;X;Phospho (STY);X;X;X;X;X;X;X;X;X;Phospho (STY);X;X;X;X;X	XXXXXXPPPPPPPPPPPPXXXXXXXXXXXXX	KFPTTATKIS(1)PK	KFPT(-131.03)T(-108.37)AT(-89.94)KIS(89.94)PK	10	3	0.12424	0.62392														1.0444
O14974;O14974-4;O14974-3;O14974-2;O14974-5	299;299;299;299;212	O14974	O14974	Protein phosphatase 1 regulatory subunit 12A	PPP1R12A	>sp|O14974|MYPT1_HUMAN Protein phosphatase 1 regulatory subunit 12A OS=Homo sapiens GN=PPP1R12A PE=1 SV=1;>sp|O14974-4|MYPT1_HUMAN Isoform 4 of Protein phosphatase 1 regulatory subunit 12A OS=Homo sapiens GN=PPP1R12A;>sp|O14974-3|MYPT1_HUMAN Isoform 3 of P	1	80.6628	1.14274e-37	352.6	305.56	1	S	QKKQNLLHSEKRDKKSPLIESTANMDNNQSQ	X;X;X;X;X;X;X;X;X;X;X;X;X;X;X;Phospho (STY);X;X;X;X;X;X;X;X;Oxidation (M);X;X;X;X;X;X	XXXXXXXXXXXXXXPPPPPPPPPPPPPPPPP	S(1)PLIESTANMDNNQSQK	S(80.66)PLIES(-80.66)T(-91.75)ANMDNNQS(-183.1)QK	1	3	-0.25796	0.96703	0.73519	0.66904	0.86703	0.6555	0.83145	0.66445	0.85655	0.77955	0.81006	0.75403	0.68643	0.80952	0.76439	0.8226	0.89725	0.79998	0.61827	0.75988	0.77256	0.69713	0.98519	0.83768	0.71333	0.87432	0.17073	0.86583	0.18755
O14974;O14974-4;O14974-3;O14974-2;O14974-5	507;507;507;507;420	O14974	O14974	Protein phosphatase 1 regulatory subunit 12A	PPP1R12A	>sp|O14974|MYPT1_HUMAN Protein phosphatase 1 regulatory subunit 12A OS=Homo sapiens GN=PPP1R12A PE=1 SV=1;>sp|O14974-4|MYPT1_HUMAN Isoform 4 of Protein phosphatase 1 regulatory subunit 12A OS=Homo sapiens GN=PPP1R12A;>sp|O14974-3|MYPT1_HUMAN Isoform 3 of P	0.976701	19.2345	0.000176459	98.508	50.103	1	S	TRLAYVAPTIPRRLASTSDIEEKENRDSSSL	X;X;X;X;X;X;X;X;X;X;X;X;X;X;X;Phospho (STY);X;X;X;X;X;X;X;X;X;X;X;X;X;X;X	XXXXXXXXXXXXPPPPPPPPPPPXXXXXXXX	RLAS(0.977)T(0.012)S(0.012)DIEEK	RLAS(19.23)T(-19.23)S(-19.23)DIEEK	4	2	0.30254																			0.27911	0.34664		0.24559	0.17215		0.30927		0.36821
O14974;O14974-4;O14974-3;O14974-2;O14974-5	509;509;509;509;422	O14974	O14974	Protein phosphatase 1 regulatory subunit 12A	PPP1R12A	>sp|O14974|MYPT1_HUMAN Protein phosphatase 1 regulatory subunit 12A OS=Homo sapiens GN=PPP1R12A PE=1 SV=1;>sp|O14974-4|MYPT1_HUMAN Isoform 4 of Protein phosphatase 1 regulatory subunit 12A OS=Homo sapiens GN=PPP1R12A;>sp|O14974-3|MYPT1_HUMAN Isoform 3 of P	0.481739	0.183107	0.00250759	74.966	44.238		S	LAYVAPTIPRRLASTSDIEEKENRDSSSLRT	X;X;X;X;X;X;X;X;X;X;X;X;X;X;X;Phospho (STY);X;X;X;X;X;X;X;X;X;X;X;X;X;X;X	XXXXXXXXXXPPPPPPPPPPPXXXXXXXXXX	RLAS(0.056)T(0.462)S(0.482)DIEEK	RLAS(-9.31)T(-0.18)S(0.18)DIEEK	6	2	-0.18495
O14974;O14974-4;O14974-3;O14974-2;O14974-5	695;636;639;695;608	O14974	O14974	Protein phosphatase 1 regulatory subunit 12A	PPP1R12A	>sp|O14974|MYPT1_HUMAN Protein phosphatase 1 regulatory subunit 12A OS=Homo sapiens GN=PPP1R12A PE=1 SV=1;>sp|O14974-4|MYPT1_HUMAN Isoform 4 of Protein phosphatase 1 regulatory subunit 12A OS=Homo sapiens GN=PPP1R12A;>sp|O14974-3|MYPT1_HUMAN Isoform 3 of P	0.99538	23.333	2.48733e-33	284.1	230.56	1	S	SQRKARSRQARQSRRSTQGVTLTDLQEAEKT	X;X;X;X;X;X;X;X;X;X;X;X;X;X;X;Phospho (STY);X;X;X;X;X;X;X;X;X;X;X;X;X;X;X	XXXXXXXXXXXXXXPPPPPPPPPPPPPPPPX	S(0.995)T(0.005)QGVTLTDLQEAEK	S(23.33)T(-23.33)QGVT(-101.61)LT(-120.35)DLQEAEK	1	3	-0.47168		2.7912							5.1741		3.7504			3.8955		0.88883	1.1437	0.95051	0.73275		0.78766				1.2211	1.0886	1.0105	1.1776
O14974;O14974-4;O14974-3;O14974-2;O14974-5	473;473;473;473;386	O14974	O14974	Protein phosphatase 1 regulatory subunit 12A	PPP1R12A	>sp|O14974|MYPT1_HUMAN Protein phosphatase 1 regulatory subunit 12A OS=Homo sapiens GN=PPP1R12A PE=1 SV=1;>sp|O14974-4|MYPT1_HUMAN Isoform 4 of Protein phosphatase 1 regulatory subunit 12A OS=Homo sapiens GN=PPP1R12A;>sp|O14974-3|MYPT1_HUMAN Isoform 3 of P	0.999998	57.3053	0.000502509	305.4	257.97	1;2	S	GQKEKDTAGVTRSASSPRLSSSLDNKEKEKD	X;X;X;X;X;X;X;X;X;X;X;X;X;X;X;Phospho (STY);X;X;X;Phospho (STY);X;X;X;X;X;X;X;X;X;X;X	XXXXXXXXXXXXPPPPPPPPPPPPPPXXXXX	SASS(1)PRLSSSLDNK	S(-108.96)AS(-57.31)S(57.31)PRLS(-155.3)S(-166.07)S(-205.86)LDNK	4	3	0.18111
O14974;O14974-4;O14974-3;O14974-2;O14974-5	477;477;477;477;390	O14974	O14974	Protein phosphatase 1 regulatory subunit 12A	PPP1R12A	>sp|O14974|MYPT1_HUMAN Protein phosphatase 1 regulatory subunit 12A OS=Homo sapiens GN=PPP1R12A PE=1 SV=1;>sp|O14974-4|MYPT1_HUMAN Isoform 4 of Protein phosphatase 1 regulatory subunit 12A OS=Homo sapiens GN=PPP1R12A;>sp|O14974-3|MYPT1_HUMAN Isoform 3 of P	0.999957	44.4361	0.00381343	144.18	76.768	1;2	S	KDTAGVTRSASSPRLSSSLDNKEKEKDSKGT	X;X;X;X;X;X;X;X;X;X;X;Phospho (STY);X;X;X;Phospho (STY);X;X;X;X;X;X;X;X;X;X;X;X;X;X;X	XXXXXXXXPPPPPPPPPPPPPPXXXXXXXXX	S(0.012)AS(0.102)S(0.886)PRLS(1)SSLDNK	S(-18.68)AS(-9.38)S(9.38)PRLS(44.44)S(-44.44)S(-68.02)LDNK	8	3	-0.59707
O14974;O14974-4;O14974-3;O14974-2;O14974-5	862;803;806;862;775	O14974	O14974	Protein phosphatase 1 regulatory subunit 12A	PPP1R12A	>sp|O14974|MYPT1_HUMAN Protein phosphatase 1 regulatory subunit 12A OS=Homo sapiens GN=PPP1R12A PE=1 SV=1;>sp|O14974-4|MYPT1_HUMAN Isoform 4 of Protein phosphatase 1 regulatory subunit 12A OS=Homo sapiens GN=PPP1R12A;>sp|O14974-3|MYPT1_HUMAN Isoform 3 of P	0.988814	19.5302	1.29289e-07	89.979	74.456	1;2	S	REKRRSTGVSFWTQDSDENEQEQQSDTEEGS	X;X;X;X;X;X;X;X;X;X;X;X;X;X;X;Phospho (STY);X;X;X;X;X;X;X;X;Phospho (STY);X;X;X;X;X;X	XXXXXPPPPPPPPPPPPPPPPPPPPPPPPPP	STGVSFWT(0.012)QDS(0.989)DENEQEQQS(0.949)DT(0.046)EEGS(0.004)NKK	S(-67.86)T(-67.63)GVS(-59.97)FWT(-19.53)QDS(19.53)DENEQEQQS(13.18)DT(-13.18)EEGS(-23.37)NKK	11	3	-0.46999			0.82461					0.92837												1.0612	1.0098	0.95866	1.1121	1.1823			0.86263	1.1417
O14974;O14974-4;O14974-3;O14974-2;O14974-5	871;812;815;871;784	O14974	O14974	Protein phosphatase 1 regulatory subunit 12A	PPP1R12A	>sp|O14974|MYPT1_HUMAN Protein phosphatase 1 regulatory subunit 12A OS=Homo sapiens GN=PPP1R12A PE=1 SV=1;>sp|O14974-4|MYPT1_HUMAN Isoform 4 of Protein phosphatase 1 regulatory subunit 12A OS=Homo sapiens GN=PPP1R12A;>sp|O14974-3|MYPT1_HUMAN Isoform 3 of P	0.996581	24.6812	7.79362e-20	126.1	103.74	1;2	S	SFWTQDSDENEQEQQSDTEEGSNKKETQTDS	X;X;X;Phospho (STY);X;X;Phospho (STY);X;X;X;X;X;X;X;X;Phospho (STY);X;X;X;X;X;X;X;X;X;X;X;X;X;X;X	PPPPPPPPPPPPPPPPPPPPPPPPPXXXXXX	STGVSFWTQDSDENEQEQQS(0.997)DT(0.003)EEGSNKK	S(-102.48)T(-98.06)GVS(-93.73)FWT(-66.19)QDS(-68.36)DENEQEQQS(24.68)DT(-24.68)EEGS(-45.62)NKK	20	3	0.28639	1.04	1.4313		1.2629	1.1152	1.1176	1.0136		0.81944	0.74345	0.68263	0.5716	0.85893	0.88479	1.2106		1.0607	1.1406	1.0495	1.1259	1.0675	0.98831	0.92581	1.1823	1.0258	0.74889	1.2194	0.81831
O14974;O14974-4;O14974-3;O14974-2;O14974-5	877;818;821;877;790	O14974	O14974	Protein phosphatase 1 regulatory subunit 12A	PPP1R12A	>sp|O14974|MYPT1_HUMAN Protein phosphatase 1 regulatory subunit 12A OS=Homo sapiens GN=PPP1R12A PE=1 SV=1;>sp|O14974-4|MYPT1_HUMAN Isoform 4 of Protein phosphatase 1 regulatory subunit 12A OS=Homo sapiens GN=PPP1R12A;>sp|O14974-3|MYPT1_HUMAN Isoform 3 of P	0.794865	8.90289	3.34962e-06	73.461	57.497	1	S	SDENEQEQQSDTEEGSNKKETQTDSISRYET	X;X;X;X;X;X;X;X;X;X;X;X;X;X;X;Phospho (STY);X;X;X;X;X;X;X;X;X;X;X;X;X;X;X	PPPPPPPPPPPPPPPPPPPXXXXXXXXXXXX	STGVSFWTQDSDENEQEQQS(0.102)DT(0.102)EEGS(0.795)NKK	S(-54.61)T(-54.61)GVS(-52.15)FWT(-47.27)QDS(-32.48)DENEQEQQS(-8.9)DT(-8.9)EEGS(8.9)NKK	26	4	-0.10241																		1.5092			0.94953	1.0425	0.89862	0.94711	1.1517		0.7067
O14974;O14974-4;O14974-3;O14974-2;O14974-5	445;445;445;445;358	O14974	O14974	Protein phosphatase 1 regulatory subunit 12A	PPP1R12A	>sp|O14974|MYPT1_HUMAN Protein phosphatase 1 regulatory subunit 12A OS=Homo sapiens GN=PPP1R12A PE=1 SV=1;>sp|O14974-4|MYPT1_HUMAN Isoform 4 of Protein phosphatase 1 regulatory subunit 12A OS=Homo sapiens GN=PPP1R12A;>sp|O14974-3|MYPT1_HUMAN Isoform 3 of P	0.998361	28.7476	1.9622e-05	123.55	99.298	1	S	DESPATWRLGLRKTGSYGALAEITASKEGQK	X;X;Phospho (STY);X;X;X;X;X;X;X;X;X;X;X;X;Phospho (STY);X;X;X;X;X;X;X;X;X;X;X;X;X;X;X	XXXXXXXXXXXXXPPPPPPPPPPPPPPXXXX	T(0.001)GS(0.998)YGALAEITASK	T(-28.75)GS(28.75)Y(-35.13)GALAEIT(-83.5)AS(-88.82)K	3	2	0.12263
O14974;O14974-4;O14974-3;O14974-2;O14974-5	402;402;402;402;315	O14974	O14974	Protein phosphatase 1 regulatory subunit 12A	PPP1R12A	>sp|O14974|MYPT1_HUMAN Protein phosphatase 1 regulatory subunit 12A OS=Homo sapiens GN=PPP1R12A PE=1 SV=1;>sp|O14974-4|MYPT1_HUMAN Isoform 4 of Protein phosphatase 1 regulatory subunit 12A OS=Homo sapiens GN=PPP1R12A;>sp|O14974-3|MYPT1_HUMAN Isoform 3 of P	0.42284	0.824161	8.61513e-05	51.858	36.703		S	STQAAPVAVTTPTVSSGQATPTSPIKKFPTT	X;X;X;X;X;X;X;X;X;X;X;X;X;X;X;Phospho (STY);X;X;X;X;X;Phospho (STY);X;X;X;X;X;X;X;X;X	PPPPPPPPPPPPPPPPPPPPPPPPPPXXXXX	TKPLASVTNANTSSTQAAPVAVT(0.023)T(0.023)PT(0.056)VS(0.152)S(0.423)GQAT(0.386)PT(0.468)S(0.468)PIK	T(-47.74)KPLAS(-47.74)VT(-45.99)NANT(-45.99)S(-43.93)S(-41.02)T(-41.02)QAAPVAVT(-13.57)T(-13.57)PT(-9.19)VS(-4.66)S(0.82)GQAT(-0.82)PT(0)S(0)PIK	29	4	-0.49973
O14974;O14974-4;O14974-3;O14974-2;O14974-5	409;409;409;409;322	O14974	O14974	Protein phosphatase 1 regulatory subunit 12A	PPP1R12A	>sp|O14974|MYPT1_HUMAN Protein phosphatase 1 regulatory subunit 12A OS=Homo sapiens GN=PPP1R12A PE=1 SV=1;>sp|O14974-4|MYPT1_HUMAN Isoform 4 of Protein phosphatase 1 regulatory subunit 12A OS=Homo sapiens GN=PPP1R12A;>sp|O14974-3|MYPT1_HUMAN Isoform 3 of P	0.934188	11.7006	1.21529e-15	88.094	77.001	1	S	AVTTPTVSSGQATPTSPIKKFPTTATKISPK	X;X;X;X;X;X;X;X;X;X;X;X;X;X;X;Phospho (STY);X;X;X;X;X;X;X;X;X;X;X;X;Phospho (STY);X;X	PPPPPPPPPPPPPPPPPPPXXXXXXXXXXXX	TKPLASVTNANTSSTQAAPVAVTTPTVSSGQAT(0.002)PT(0.063)S(0.934)PIK	T(-81.62)KPLAS(-82.06)VT(-82.06)NANT(-82.27)S(-82.27)S(-80.25)T(-78.21)QAAPVAVT(-56.19)T(-56.19)PT(-44.28)VS(-35.31)S(-35.31)GQAT(-26.54)PT(-11.7)S(11.7)PIK	36	3	-0.11687							1.0476
O14976;O14976-2	770;691	O14976	O14976	Cyclin-G-associated kinase	GAK	>sp|O14976|GAK_HUMAN Cyclin-G-associated kinase OS=Homo sapiens GN=GAK PE=1 SV=2;>sp|O14976-2|GAK_HUMAN Isoform 2 of Cyclin-G-associated kinase OS=Homo sapiens GN=GAK	0.993862	23.9243	9.1663e-08	67.309	56.995	2	S	PRQPGSTAQYDAGAGSPEAEPTDSDSPPSSS	X;X;X;X;X;X;X;X;X;X;X;X;X;X;X;Phospho (STY);X;X;X;X;X;X;X;Phospho (STY);X;Phospho (STY);X;X;Phospho (STY);X;Phospho (STY)	PPPPPPPPPPPPPPPPPPPPPPPPPPPPPPP	FGKPELPRQPGSTAQY(0.004)DAGAGS(0.994)PEAEPT(0.054)DS(0.397)DS(0.397)PPS(0.087)S(0.042)S(0.02)ADAS(0.005)R	FGKPELPRQPGS(-34.9)T(-34.9)AQY(-23.92)DAGAGS(23.92)PEAEPT(-8.75)DS(0)DS(0)PPS(-6.61)S(-9.82)S(-12.97)ADAS(-19.08)R	22	4	-0.027146	1.5234	1.9519		1.3292				0.60144	0.72212				1.11	1.0015	1.4074	0.77532			0.49304	0.38345	0.41436		0.2968					1.856
O14976;O14976-2	778;699	O14976	O14976	Cyclin-G-associated kinase	GAK	>sp|O14976|GAK_HUMAN Cyclin-G-associated kinase OS=Homo sapiens GN=GAK PE=1 SV=2;>sp|O14976-2|GAK_HUMAN Isoform 2 of Cyclin-G-associated kinase OS=Homo sapiens GN=GAK	0.662317	4.78047	3.30182e-06	58.566	43.994	2	S	QYDAGAGSPEAEPTDSDSPPSSSADASRFLH	X;X;X;X;X;X;X;Phospho (STY);X;X;X;X;X;X;X;Phospho (STY);X;X;X;X;X;X;X;X;X;X;X;X;X;X;X	PPPPPPPPPPPPPPPPPPPPPPPPPPPPXXX	FGKPELPRQPGS(0.008)T(0.008)AQY(0.015)DAGAGS(0.962)PEAEPT(0.048)DS(0.662)DS(0.222)PPS(0.015)S(0.015)S(0.041)ADAS(0.003)R	FGKPELPRQPGS(-21.39)T(-21.39)AQY(-18.45)DAGAGS(18.45)PEAEPT(-12.13)DS(4.78)DS(-4.78)PPS(-16.48)S(-16.48)S(-12.13)ADAS(-23.2)R	30	4	-0.52691
O14976;O14976-2	780;701	O14976	O14976	Cyclin-G-associated kinase	GAK	>sp|O14976|GAK_HUMAN Cyclin-G-associated kinase OS=Homo sapiens GN=GAK PE=1 SV=2;>sp|O14976-2|GAK_HUMAN Isoform 2 of Cyclin-G-associated kinase OS=Homo sapiens GN=GAK	0.809481	8.62685	9.1663e-08	67.309	56.995	2	S	DAGAGSPEAEPTDSDSPPSSSADASRFLHTL	X;X;X;X;X;Phospho (STY);X;X;X;X;X;X;X;X;X;Phospho (STY);X;X;X;X;X;X;X;X;X;X;X;X;X;X;X	PPPPPPPPPPPPPPPPPPPPPPPPPPXXXXX	FGKPELPRQPGS(0.042)T(0.042)AQY(0.092)DAGAGS(0.823)PEAEPT(0.047)DS(0.116)DS(0.809)PPS(0.015)S(0.007)S(0.003)ADAS(0.003)R	FGKPELPRQPGS(-13.05)T(-13.05)AQY(-9.72)DAGAGS(9.72)PEAEPT(-12.36)DS(-8.63)DS(8.63)PPS(-17.48)S(-21.27)S(-24.89)ADAS(-24.4)R	32	4	-0.19006	1.5234	1.9519		1.3292				0.60144	0.72212				1.11			0.77532			0.49304	0.38345	0.41436		0.2968
O14976;O14976-2	783;704	O14976	O14976	Cyclin-G-associated kinase	GAK	>sp|O14976|GAK_HUMAN Cyclin-G-associated kinase OS=Homo sapiens GN=GAK PE=1 SV=2;>sp|O14976-2|GAK_HUMAN Isoform 2 of Cyclin-G-associated kinase OS=Homo sapiens GN=GAK	0.282944	0	3.06936e-05	50.928	43.347		S	AGSPEAEPTDSDSPPSSSADASRFLHTLDWQ	X;X;Phospho (STY);X;X;X;X;X;X;X;X;X;X;X;X;Phospho (STY);X;X;X;X;X;X;X;X;X;X;X;X;X;X;X	PPPPPPPPPPPPPPPPPPPPPPPXXXXXXXX	FGKPELPRQPGS(0.002)T(0.004)AQY(0.043)DAGAGS(0.948)PEAEPT(0.004)DS(0.017)DS(0.283)PPS(0.283)S(0.283)S(0.122)ADAS(0.011)R	FGKPELPRQPGS(-27.93)T(-24.54)AQY(-13.52)DAGAGS(13.52)PEAEPT(-23.32)DS(-12.38)DS(0)PPS(0)S(0)S(-3.69)ADAS(-14.21)R	35	4	-0.285
O14976;O14976-2	784;705	O14976	O14976	Cyclin-G-associated kinase	GAK	>sp|O14976|GAK_HUMAN Cyclin-G-associated kinase OS=Homo sapiens GN=GAK PE=1 SV=2;>sp|O14976-2|GAK_HUMAN Isoform 2 of Cyclin-G-associated kinase OS=Homo sapiens GN=GAK	0.282944	0	3.06936e-05	50.928	43.347		S	GSPEAEPTDSDSPPSSSADASRFLHTLDWQE	X;X;X;X;X;X;X;X;X;X;X;X;X;X;X;X;X;X;X;X;X;X;X;X;X;X;X;X;X;X;X	XXXXXXXXXXXXXXXXXXXXXXXXXXXXXXX	FGKPELPRQPGS(0.002)T(0.004)AQY(0.043)DAGAGS(0.948)PEAEPT(0.004)DS(0.017)DS(0.283)PPS(0.283)S(0.283)S(0.122)ADAS(0.011)R	FGKPELPRQPGS(-27.93)T(-24.54)AQY(-13.52)DAGAGS(13.52)PEAEPT(-23.32)DS(-12.38)DS(0)PPS(0)S(0)S(-3.69)ADAS(-14.21)R	36	4	-0.285
O14976;O14976-2	785;706	O14976	O14976	Cyclin-G-associated kinase	GAK	>sp|O14976|GAK_HUMAN Cyclin-G-associated kinase OS=Homo sapiens GN=GAK PE=1 SV=2;>sp|O14976-2|GAK_HUMAN Isoform 2 of Cyclin-G-associated kinase OS=Homo sapiens GN=GAK	0.276498	0.684011	0.000295782	42.038	25.427		S	SPEAEPTDSDSPPSSSADASRFLHTLDWQEE	Phospho (STY);X;X;X;X;X;X;X;X;X;X;X;X;X;X;Phospho (STY);X;X;X;X;X;X;X;X;X;X;X;X;X;X;X	PPPPPPPPPPPPPPPPPPPPPXXXXXXXXXX	FGKPELPRQPGS(0.018)T(0.018)AQY(0.043)DAGAGS(0.91)PEAEPT(0.036)DS(0.239)DS(0.239)PPS(0.107)S(0.107)S(0.276)ADAS(0.007)R	FGKPELPRQPGS(-17.4)T(-17.4)AQY(-13.54)DAGAGS(13.54)PEAEPT(-10.04)DS(-0.68)DS(-0.68)PPS(-4.21)S(-4.21)S(0.68)ADAS(-16.42)R	37	4	-0.69705
O14978	153	O14978	O14978	Zinc finger protein 263	ZNF263	>sp|O14978|ZN263_HUMAN Zinc finger protein 263 OS=Homo sapiens GN=ZNF263 PE=1 SV=2	0.586598	4.19856	0.00419735	46.877	33.289	1	S	EVLLEEPLPLETARESPSFKLEPMETERSPG	X;X;X;X;X;X;X;X;X;X;X;X;X;X;X;Phospho (STY);X;X;X;X;X;X;X;X;X;X;X;X;X;X;X	PPPPPPPPPPPPPPPPPPPPXXXXXXXXXXX	GTEVLLEEPLPLET(0.19)ARES(0.587)PS(0.223)FK	GT(-45.38)EVLLEEPLPLET(-4.89)ARES(4.2)PS(-4.2)FK	18	3	1.0162
O14978	178	O14978	O14978	Zinc finger protein 263	ZNF263	>sp|O14978|ZN263_HUMAN Zinc finger protein 263 OS=Homo sapiens GN=ZNF263 PE=1 SV=2	1	216.713	4.52523e-05	243.11	197.69	1	S	TERSPGPRLQELLGPSPQRDPQAVKERALSA	X;X;X;X;X;X;X;X;X;X;X;X;X;X;X;Phospho (STY);X;X;X;X;X;X;X;X;X;X;X;X;X;X;X	XXXXXXXXPPPPPPPPPPPPPPPPPXXXXXX	LQELLGPS(1)PQRDPQAVK	LQELLGPS(216.71)PQRDPQAVK	8	3	-0.16961	0.96092	0.74068	0.43088	0.79825	0.74274	0.91451	0.66775	0.78757	0.44766								0.8945	1.1622				0.6359	0.59735	0.99023		0.33731
O14979;O14979-3;O14979-2	241;122;122	O14979	O14979	Heterogeneous nuclear ribonucleoprotein D-like	HNRPDL	>sp|O14979|HNRDL_HUMAN Heterogeneous nuclear ribonucleoprotein D-like OS=Homo sapiens GN=HNRNPDL PE=1 SV=3;>sp|O14979-3|HNRDL_HUMAN Isoform 3 of Heterogeneous nuclear ribonucleoprotein D-like OS=Homo sapiens GN=HNRNPDL;>sp|O14979-2|HNRDL_HUMAN Isoform 2 of	0.999997	54.8529	1.14239e-18	238.83	197.21	1	S	LKGKEPPKKVFVGGLSPDTSEEQIKEYFGAF	X;X;X;X;X;X;X;X;X;X;X;X;X;X;X;Phospho (STY);X;X;X;X;X;X;X;X;X;X;X;X;X;X;X	XXXXXXXXXPPPPPPPPPPPPPPPPXXXXXX	VFVGGLS(1)PDTSEEQIK	VFVGGLS(54.85)PDT(-54.85)S(-74.76)EEQIK	7	3	0.17158		0.6531	0.39501	0.69243	0.78544	0.93676	0.68403	0.78187	0.72915	0.93661		0.71575	0.64692	0.79675	0.67557		1.1279	0.73393	0.64892	0.68319	1.2016	0.83816	0.78102	0.47556		0.35702
O14979;O14979-3;O14979-2	245;126;126	O14979	O14979	Heterogeneous nuclear ribonucleoprotein D-like	HNRPDL	>sp|O14979|HNRDL_HUMAN Heterogeneous nuclear ribonucleoprotein D-like OS=Homo sapiens GN=HNRNPDL PE=1 SV=3;>sp|O14979-3|HNRDL_HUMAN Isoform 3 of Heterogeneous nuclear ribonucleoprotein D-like OS=Homo sapiens GN=HNRNPDL;>sp|O14979-2|HNRDL_HUMAN Isoform 2 of	0.909051	10.5116	2.86525e-05	123.96	97.596	1	S	EPPKKVFVGGLSPDTSEEQIKEYFGAFGEIE	X;X;X;X;X;X;X;X;X;X;X;X;X;X;X;Phospho (STY);X;X;X;X;X;X;X;X;X;X;X;X;X;X;X	XXXXXPPPPPPPPPPPPPPPPXXXXXXXXXX	VFVGGLS(0.01)PDT(0.081)S(0.909)EEQIK	VFVGGLS(-19.52)PDT(-10.51)S(10.51)EEQIK	11	3	-0.22584	1.1415
O14980	1031	O14980	O14980	Exportin-1	XPO1	>sp|O14980|XPO1_HUMAN Exportin-1 OS=Homo sapiens GN=XPO1 PE=1 SV=1	0.993995	22.1886	1.24512e-20	169.49	146.96	1	S	RDFLVQIKEFAGEDTSDLFLEEREIALRQAD	X;X;X;X;X;X;X;X;X;X;X;X;X;X;X;Phospho (STY);X;X;X;X;X;X;X;X;X;X;X;X;X;X;X	XXXXXXXXPPPPPPPPPPPPPPPPPPPPXXX	EFAGEDT(0.006)S(0.994)DLFLEER	EFAGEDT(-22.19)S(22.19)DLFLEER	8	2	-0.014964	0.92107								0.91497	1.1068					0.73363	0.82279	0.95511
O14980	387	O14980	O14980	Exportin-1	XPO1	>sp|O14980|XPO1_HUMAN Exportin-1 OS=Homo sapiens GN=XPO1 PE=1 SV=1	0.798714	6.28143	9.28598e-05	75.529	55.233	1	S	YWNHLAAELYRESPFSTSASPLLSGSQHFDV	X;X;X;X;X;X;X;X;X;X;X;X;X;X;X;Phospho (STY);X;X;X;X;X;X;X;X;X;X;X;X;X;X;X	XXXXXXXXXXXPPPPPPPPPPPPPPPPPPPP	ES(0.003)PFS(0.799)T(0.188)S(0.01)AS(0.001)PLLSGSQHFDVPPR	ES(-25.02)PFS(6.28)T(-6.28)S(-19.1)AS(-29.59)PLLS(-44.88)GS(-49.91)QHFDVPPR	5	3	-0.56322
O14980	389	O14980	O14980	Exportin-1	XPO1	>sp|O14980|XPO1_HUMAN Exportin-1 OS=Homo sapiens GN=XPO1 PE=1 SV=1	0.951339	14.3485	7.7246e-05	80.236	50.654	1	S	NHLAAELYRESPFSTSASPLLSGSQHFDVPP	X;X;X;X;X;X;X;X;X;X;X;X;X;X;X;Phospho (STY);X;X;X;X;X;X;X;X;X;X;X;X;X;X;X	XXXXXXXXXPPPPPPPPPPPPPPPPPPPPPP	ESPFS(0.003)T(0.01)S(0.951)AS(0.035)PLLS(0.001)GSQHFDVPPR	ES(-36.76)PFS(-25.57)T(-19.68)S(14.35)AS(-14.35)PLLS(-32.18)GS(-43.78)QHFDVPPR	7	3	-1.4668															1.0198
O14980	391	O14980	O14980	Exportin-1	XPO1	>sp|O14980|XPO1_HUMAN Exportin-1 OS=Homo sapiens GN=XPO1 PE=1 SV=1	0.921648	11.6731	1.69139e-06	90.453	57.322	1	S	LAAELYRESPFSTSASPLLSGSQHFDVPPRR	X;X;X;X;X;X;X;X;X;X;X;X;X;X;X;Phospho (STY);X;X;X;X;X;X;X;X;X;X;X;X;X;X;X	XXXXXXXPPPPPPPPPPPPPPPPPPPPPPPP	ESPFS(0.002)T(0.012)S(0.063)AS(0.922)PLLS(0.002)GSQHFDVPPR	ES(-53.05)PFS(-26.46)T(-18.86)S(-11.67)AS(11.67)PLLS(-27.71)GS(-45.81)QHFDVPPR	9	3	-1.3521	1.028			0.93066		0.98382						0.82533	0.70417				0.88813	0.70341		0.76059				0.75627	0.81627		0.81373
O14980	395	O14980	O14980	Exportin-1	XPO1	>sp|O14980|XPO1_HUMAN Exportin-1 OS=Homo sapiens GN=XPO1 PE=1 SV=1	0.945124	14.5744	0.00149591	84.156	65.311	1	S	LYRESPFSTSASPLLSGSQHFDVPPRRQLYL	X;X;X;X;X;X;X;X;X;X;X;X;X;X;X;Phospho (STY);X;X;X;X;X;X;X;X;X;X;X;X;X;X;X	XXXPPPPPPPPPPPPPPPPPPPPPPPPXXXX	ESPFS(0.001)T(0.002)S(0.008)AS(0.01)PLLS(0.945)GS(0.033)QHFDVPPRR	ES(-40.81)PFS(-31.45)T(-26.14)S(-20.51)AS(-19.56)PLLS(14.57)GS(-14.57)QHFDVPPRR	13	4	-0.22162		0.75551		0.88263	1.0099				0.95877						1.0779	0.7651			0.89698
O14980	397	O14980	O14980	Exportin-1	XPO1	>sp|O14980|XPO1_HUMAN Exportin-1 OS=Homo sapiens GN=XPO1 PE=1 SV=1	0.342274	1.42453	0.000888446	55.575	34.536		S	RESPFSTSASPLLSGSQHFDVPPRRQLYLPM	X;X;X;X;X;X;X;X;X;X;X;X;X;X;X;Phospho (STY);X;X;X;X;X;X;X;X;X;X;X;X;X;X;X	XPPPPPPPPPPPPPPPPPPPPPPPPXXXXXX	ES(0.008)PFS(0.247)T(0.063)S(0.063)AS(0.247)PLLS(0.03)GS(0.342)QHFDVPPRR	ES(-16.56)PFS(-1.42)T(-7.33)S(-7.33)AS(-1.42)PLLS(-10.51)GS(1.42)QHFDVPPRR	15	3	-0.72886
O14980	1055	O14980	O14980	Exportin-1	XPO1	>sp|O14980|XPO1_HUMAN Exportin-1 OS=Homo sapiens GN=XPO1 PE=1 SV=1	1	85.5632	8.54986e-05	85.563	61.725	1	S	IALRQADEEKHKRQMSVPGIFNPHEIPEEMC	X;X;X;X;X;X;X;X;X;X;X;X;X;X;X;Phospho (STY);X;X;X;X;X;X;X;X;X;X;X;X;X;X;X	XXXXXXXXXXXXPPPPPPPPPPPPPPPPPPP	RQMS(1)VPGIFNPHEIPEEMCD	RQMS(85.56)VPGIFNPHEIPEEMCD	4	3	-0.2825	1.5353	0.67917	0.31995	0.73695		0.46565
O14981	261	O14981	O14981	TATA-binding protein-associated factor 172	BTAF1	>sp|O14981|BTAF1_HUMAN TATA-binding protein-associated factor 172 OS=Homo sapiens GN=BTAF1 PE=1 SV=2	1	79.9453	1.01852e-06	140.11	56.361	1	S	RRKIANVVINQSANDSKVLIDNIPDSSSLIE	X;X;X;X;X;X;X;X;X;X;X;X;X;X;X;Phospho (STY);X;X;X;X;X;X;X;X;X;X;X;X;X;X;X	XXXPPPPPPPPPPPPPPXXXXXXXXXXXXXX	IANVVINQSANDS(1)K	IANVVINQS(-79.95)ANDS(79.95)K	13	3	0.95493
O14981	91	O14981	O14981	TATA-binding protein-associated factor 172	BTAF1	>sp|O14981|BTAF1_HUMAN TATA-binding protein-associated factor 172 OS=Homo sapiens GN=BTAF1 PE=1 SV=2	0.987181	18.8711	3.55572e-05	107.15	87.399	1	S	WNPVPRTRQEPTSESSMEDSPTTERLNFDRF	X;X;X;X;X;X;X;X;X;X;X;X;X;X;X;Phospho (STY);X;X;X;X;X;X;X;X;X;X;X;X;X;X;X	XXXXXXPPPPPPPPPPPPPPPPPPPXXXXXX	TRQEPTSES(0.013)S(0.987)MEDSPTTER	T(-81.74)RQEPT(-70.34)S(-65.9)ES(-18.87)S(18.87)MEDS(-48.59)PT(-58.09)T(-58.09)ER	10	3	0.091282																0.80757		0.77877	0.90597	0.62816	0.70096	0.87932	0.83693		1.0733		0.919
O14981	95	O14981	O14981	TATA-binding protein-associated factor 172	BTAF1	>sp|O14981|BTAF1_HUMAN TATA-binding protein-associated factor 172 OS=Homo sapiens GN=BTAF1 PE=1 SV=2	0.982581	17.7539	9.05151e-11	141.3	112.22	1	S	PRTRQEPTSESSMEDSPTTERLNFDRFDICR	X;X;X;X;X;X;X;X;X;X;X;X;X;X;X;Phospho (STY);X;X;X;X;X;X;X;X;X;X;X;X;X;X;X	XXPPPPPPPPPPPPPPPPPPPXXXXXXXXXX	TRQEPTSESSMEDS(0.983)PT(0.016)T(0.001)ER	T(-130.53)RQEPT(-127.21)S(-116.57)ES(-101.25)S(-82.11)MEDS(17.75)PT(-17.75)T(-30.2)ER	14	3	0.79006																	1.2028	1.1232	1.1763		0.74082	0.84357	0.99885	0.81805	1.0177		0.83313	0.32834
O15013;O15013-7;O15013-4;O15013-5;O15013-6	1232;1169;1203;1207;1231	O15013	O15013	Rho guanine nucleotide exchange factor 10	ARHGEF10	>sp|O15013|ARHGA_HUMAN Rho guanine nucleotide exchange factor 10 OS=Homo sapiens GN=ARHGEF10 PE=1 SV=4;>sp|O15013-7|ARHGA_HUMAN Isoform 3 of Rho guanine nucleotide exchange factor 10 OS=Homo sapiens GN=ARHGEF10;>sp|O15013-4|ARHGA_HUMAN Isoform 4 of Rho gua	0.999999	59.5451	3.21933e-05	204.85	145.65	1	S	LATALHEKDKDKSRDSLAPGPEPQDEDQKDA	X;X;X;X;X;X;X;X;X;X;X;X;X;X;X;Phospho (STY);X;X;X;X;X;X;X;X;X;X;X;X;X;X;X	XXXXXXXXXXXXPPPPPPPPPPPPPPPPPXX	SRDS(1)LAPGPEPQDEDQK	S(-59.55)RDS(59.55)LAPGPEPQDEDQK	4	3	1.1834																	0.73987		0.89627	0.638	0.69294	0.86614	0.71854	0.55791	0.8462		0.47958	0.42818
O15014	758	O15014	O15014	Zinc finger protein 609	ZNF609	>sp|O15014|ZN609_HUMAN Zinc finger protein 609 OS=Homo sapiens GN=ZNF609 PE=1 SV=2	1	76.7803	0.00134117	195.45	127.28	1	S	SPLTPGKVCRAEEGKSPFRESSGDGMKMEGL	Phospho (STY);X;X;Phospho (STY);X;X;X;X;X;X;X;X;X;X;X;Phospho (STY);X;X;X;X;X;X;X;X;X;X;X;X;X;X;X	XXXXXXXXXXPPPPPPPPPPPPPPPPPXXXX	AEEGKS(1)PFRESSGDGMK	AEEGKS(76.78)PFRES(-76.78)S(-91.72)GDGMK	6	3	-2.4776				0.8434	0.63543							0.26704
O15014	743	O15014	O15014	Zinc finger protein 609	ZNF609	>sp|O15014|ZN609_HUMAN Zinc finger protein 609 OS=Homo sapiens GN=ZNF609 PE=1 SV=2	1	62.077	0.000144538	108.23	69.053	2	S	KKKDKKKKESSKELESPLTPGKVCRAEEGKS	X;X;X;X;X;X;X;X;X;X;X;X;X;X;X;Phospho (STY);X;X;Phospho (STY);X;X;X;X;X;X;X;X;X;X;X;Phospho (STY)	XXXXXXXXXXXXPPPPPPPPPPXXXXXXXXX	ELES(1)PLT(1)PGK	ELES(62.08)PLT(62.08)PGK	4	2	-0.065707	0.64391			0.52532	0.47628	0.51554	0.36372	0.43402	0.30159	0.35625	0.17233				0.50406	0.3632		0.32497	0.31746	0.3044	0.23463	0.30286	0.32563	0.23329
O15014	358	O15014	O15014	Zinc finger protein 609	ZNF609	>sp|O15014|ZN609_HUMAN Zinc finger protein 609 OS=Homo sapiens GN=ZNF609 PE=1 SV=2	0.998307	27.9055	2.74398e-08	151.56	117.51	1	S	LDCTRHDWAPPRFCDSPTSDLEMRNGRGRGK	X;X;X;X;X;X;X;X;X;X;X;X;X;X;X;Phospho (STY);X;X;X;X;X;X;X;X;X;X;X;X;X;X;X	XXXXXXXXXXXXPPPPPPPPPPPPXXXXXXX	FCDS(0.998)PT(0.002)SDLEMR	FCDS(27.91)PT(-27.91)S(-41.18)DLEMR	4	2	-0.0017275															0.66972	0.68768	0.59441		0.70917	0.63686	0.58525	0.68496	0.71117		0.75579		0.71589
O15014	361	O15014	O15014	Zinc finger protein 609	ZNF609	>sp|O15014|ZN609_HUMAN Zinc finger protein 609 OS=Homo sapiens GN=ZNF609 PE=1 SV=2	0.416399	0	0.000175154	114.31	70.549		S	TRHDWAPPRFCDSPTSDLEMRNGRGRGKRMR	X;X;X;X;X;X;X;X;X;X;X;X;X;X;X;X;X;X;X;X;X;X;X;X;X;X;X;X;X;X;X	XXXXXXXXXXXXXXXXXXXXXXXXXXXXXXX	FCDS(0.167)PT(0.416)S(0.416)DLEMR	FCDS(-3.96)PT(0)S(0)DLEMR	7	2	-0.29076
O15014	804	O15014	O15014	Zinc finger protein 609	ZNF609	>sp|O15014|ZN609_HUMAN Zinc finger protein 609 OS=Homo sapiens GN=ZNF609 PE=1 SV=2	0.999884	39.3434	1.55002e-27	252.16	209.21	1	S	KAEADKIYSFTDNAPSPSIGGSSRLENTTPT	X;X;X;X;X;X;X;X;X;X;X;X;X;X;X;Phospho (STY);X;X;X;X;X;X;X;X;X;X;X;X;X;X;X	XXXXXXPPPPPPPPPPPPPPPPPPXXXXXXX	IYSFTDNAPS(1)PSIGGSSR	IY(-161.54)S(-129.46)FT(-68.82)DNAPS(39.34)PS(-39.34)IGGS(-151.23)S(-171.47)R	10	3	-0.32254	0.56034				0.87056	0.87453			0.47684						0.75648	1.1332		0.93259	0.88706	0.78823	0.7729	0.88049	0.84527	0.75571	0.45417
O15014	806	O15014	O15014	Zinc finger protein 609	ZNF609	>sp|O15014|ZN609_HUMAN Zinc finger protein 609 OS=Homo sapiens GN=ZNF609 PE=1 SV=2	0.92595	10.971	0.00036512	196.48	161.73	1	S	EADKIYSFTDNAPSPSIGGSSRLENTTPTQP	X;X;X;X;X;X;X;X;X;X;X;X;X;X;X;Phospho (STY);X;X;X;X;X;X;X;X;X;X;X;X;X;X;X	XXXXPPPPPPPPPPPPPPPPPPXXXXXXXXX	IYSFTDNAPS(0.074)PS(0.926)IGGSSR	IY(-92.9)S(-85.11)FT(-51.44)DNAPS(-10.97)PS(10.97)IGGS(-78.02)S(-89.52)R	12	3	-1.3319	0.56034				0.87056										0.75648		0.87964	0.61094	0.69019	0.81045		0.87059
O15014	576	O15014	O15014	Zinc finger protein 609	ZNF609	>sp|O15014|ZN609_HUMAN Zinc finger protein 609 OS=Homo sapiens GN=ZNF609 PE=1 SV=2	1	79.0414	8.27663e-05	185.27	119.02	2	S	PARSATPKVRLVEPHSPSPSSKFSTKGLCKK	X;X;X;X;X;X;X;X;X;X;X;X;X;X;X;Phospho (STY);X;Phospho (STY);X;X;X;X;X;X;X;X;X;X;X;X;X	XXXXXXXXPPPPPPPPPPPPPPXXXXXXXXX	VRLVEPHS(1)PS(1)PSSK	VRLVEPHS(79.04)PS(47.91)PS(-47.91)S(-64.52)K	8	3	0.58942	0.88519	0.5514		0.63287	0.50729	0.56721	0.42665	0.40742	0.46039	0.50076	0.37833		0.29196	0.35926	0.63857	0.37695	0.36226	0.38381		0.31552	0.34192	0.36209	0.31283	0.29326	0.30338	0.46546	0.41008
O15014	578	O15014	O15014	Zinc finger protein 609	ZNF609	>sp|O15014|ZN609_HUMAN Zinc finger protein 609 OS=Homo sapiens GN=ZNF609 PE=1 SV=2	0.999993	51.5909	8.27663e-05	185.27	119.02	2	S	RSATPKVRLVEPHSPSPSSKFSTKGLCKKKL	X;X;X;X;X;X;X;X;X;X;X;X;X;Phospho (STY);X;Phospho (STY);X;X;X;X;X;X;X;X;X;X;X;X;X;X;X	XXXXXXPPPPPPPPPPPPPPXXXXXXXXXXX	VRLVEPHS(1)PS(1)PSSK	VRLVEPHS(83.31)PS(51.59)PS(-51.59)S(-73.11)K	10	3	0.41539	0.88519	0.5514		0.63287	0.50729	0.56721	0.42665	0.40742	0.46039	0.50076	0.37833		0.29196	0.35926	0.63857	0.37695	0.36226	0.38381		0.31552	0.34192	0.36209	0.31283	0.29326	0.30338	0.46546	0.41008
O15014	379	O15014	O15014	Zinc finger protein 609	ZNF609	>sp|O15014|ZN609_HUMAN Zinc finger protein 609 OS=Homo sapiens GN=ZNF609 PE=1 SV=2	0.861952	8.01506	0.000455318	141.93	134.82	1	S	EMRNGRGRGKRMRPNSNTPVNETATASDSKG	X;X;X;X;X;X;X;X;X;X;X;X;X;X;X;Phospho (STY);X;X;X;X;X;X;X;X;X;X;X;X;X;X;X	XXXXXXXXXXXPPPPPPPPPPPPPPPPPPPX	MRPNS(0.862)NT(0.136)PVNET(0.002)ATASDSK	MRPNS(8.02)NT(-8.02)PVNET(-26.54)AT(-64.36)AS(-101.76)DS(-134.01)K	5	3	-0.27608
O15014	491	O15014	O15014	Zinc finger protein 609	ZNF609	>sp|O15014|ZN609_HUMAN Zinc finger protein 609 OS=Homo sapiens GN=ZNF609 PE=1 SV=2	1	79.0356	0.000200427	143.99	98.628	1	S	PGTKVEPTVLDRNCPSPVLIDCPHPNCNKKY	X;X;X;X;X;X;X;X;X;X;X;X;X;X;X;Phospho (STY);X;X;X;X;X;X;X;X;X;X;X;X;X;X;X	XXXXPPPPPPPPPPPPPPPPPPPPPPPPPXX	NCPS(1)PVLIDCPHPNCNK	NCPS(79.04)PVLIDCPHPNCNK	4	3	-0.82321	0.87066	0.72197	0.35083		0.63031	0.90178	0.703	0.81739	0.59405	0.60783		0.36715		0.38806	0.96328													0.2828
O15014	467	O15014	O15014	Zinc finger protein 609	ZNF609	>sp|O15014|ZN609_HUMAN Zinc finger protein 609 OS=Homo sapiens GN=ZNF609 PE=1 SV=2	0.999896	41.889	5.46525e-05	106.47	77.223	1	S	SSSEDSKGSKRVRTNSMGSATGPLPGTKVEP	X;X;X;X;X;X;X;X;X;X;X;X;X;X;X;Phospho (STY);X;X;X;X;X;X;X;X;X;X;X;X;X;X;X	XXXXXXXXXXXXXPPPPPPPPPPPPPPPXXX	TNS(1)MGSATGPLPGTK	T(-41.89)NS(41.89)MGS(-45.91)AT(-48.71)GPLPGT(-74.42)K	3	2	-0.019628	1.0453				0.7067	0.72967	0.55196	0.91767	0.81453	0.63272	0.60038	0.43832	0.69261	0.57679	0.745		0.66462	0.55587	0.74374	0.83815	0.63791	0.67245		0.60814	0.904	0.60176
O15014	470	O15014	O15014	Zinc finger protein 609	ZNF609	>sp|O15014|ZN609_HUMAN Zinc finger protein 609 OS=Homo sapiens GN=ZNF609 PE=1 SV=2	0.581406	4.23853	8.1584e-05	98.292	73.807	1	S	EDSKGSKRVRTNSMGSATGPLPGTKVEPTVL	X;X;X;X;X;X;X;X;X;X;X;X;X;X;X;Phospho (STY);X;X;X;X;X;X;X;X;X;X;X;X;X;X;X	XXXXXXXXXXPPPPPPPPPPPPPPPXXXXXX	T(0.001)NS(0.219)MGS(0.581)AT(0.198)GPLPGTK	T(-26.93)NS(-4.24)MGS(4.24)AT(-4.67)GPLPGT(-54.08)K	6	2	0.27014																0.81485
O15014	842	O15014	O15014	Zinc finger protein 609	ZNF609	>sp|O15014|ZN609_HUMAN Zinc finger protein 609 OS=Homo sapiens GN=ZNF609 PE=1 SV=2	0.577219	1.40258	1.94045e-06	90.388	68.688	3	S	VVTQNGAEASSVKTNSPAYSDISDAGEDGEG	X;X;X;X;X;X;X;X;X;X;X;X;X;X;X;Phospho (STY);X;X;X;Phospho (STY);X;X;Phospho (STY);X;X;X;X;X;X;X;X	XXXXXXXXXXXXXPPPPPPPPPPPPPPPPPP	T(0.419)NS(0.577)PAY(0.233)S(0.801)DIS(0.97)DAGEDGEGKVDSVK	T(-1.4)NS(1.4)PAY(-5.88)S(5.88)DIS(14.08)DAGEDGEGKVDS(-69.71)VK	3	3	-0.46948																		0.7401	1.0294	0.61757	0.51873		0.70598	0.77348	0.85065		0.81922	1.1906
O15014	846	O15014	O15014	Zinc finger protein 609	ZNF609	>sp|O15014|ZN609_HUMAN Zinc finger protein 609 OS=Homo sapiens GN=ZNF609 PE=1 SV=2	0.91073	9.90098	1.94045e-06	90.388	68.688	3	S	NGAEASSVKTNSPAYSDISDAGEDGEGKVDS	X;X;X;X;X;X;X;X;X;Phospho (STY);X;Phospho (STY);X;X;X;Phospho (STY);X;X;Phospho (STY);X;X;X;X;X;X;X;X;X;X;X;X	XXXXXXXXXPPPPPPPPPPPPPPPPPPPPPP	T(0.49)NS(0.496)PAY(0.157)S(0.911)DIS(0.946)DAGEDGEGKVDSVK	T(0)NS(0)PAY(-9.9)S(9.9)DIS(11.57)DAGEDGEGKVDS(-44.62)VK	7	3	-0.33064																		0.7401	1.0294	0.61757	0.51873	0.58129	0.70598	0.77348	0.85065		0.81922	1.1906
O15014	849	O15014	O15014	Zinc finger protein 609	ZNF609	>sp|O15014|ZN609_HUMAN Zinc finger protein 609 OS=Homo sapiens GN=ZNF609 PE=1 SV=2	0.969649	14.078	1.94045e-06	90.388	68.688	3	S	EASSVKTNSPAYSDISDAGEDGEGKVDSVKS	X;X;X;X;X;X;Phospho (STY);X;Phospho (STY);X;X;X;Phospho (STY);X;X;Phospho (STY);X;X;X;X;X;X;X;X;X;X;X;X;X;X;X	XXXXXXPPPPPPPPPPPPPPPPPPPPPPPPX	T(0.419)NS(0.577)PAY(0.233)S(0.801)DIS(0.97)DAGEDGEGKVDSVK	T(-1.4)NS(1.4)PAY(-5.88)S(5.88)DIS(14.08)DAGEDGEGKVDS(-69.71)VK	10	3	-0.46948																		0.7401	1.0294	0.61757	0.51873	0.58129	0.70598	0.77348	0.85065		0.81922	1.1906
O15020;O15020-2	2171;2171	O15020	O15020	Spectrin beta chain, non-erythrocytic 2	SPTBN2	>sp|O15020|SPTN2_HUMAN Spectrin beta chain, non-erythrocytic 2 OS=Homo sapiens GN=SPTBN2 PE=1 SV=3;>sp|O15020-2|SPTN2_HUMAN Isoform 2 of Spectrin beta chain, non-erythrocytic 2 OS=Homo sapiens GN=SPTBN2	0.999986	50.3257	0.00108182	63.443	18.223	1	S	QRLEHSSFPEGPGPGSGDEANGPRGERQTRT	X;X;X;X;X;X;X;X;X;X;X;X;X;X;X;Phospho (STY);X;X;X;X;X;X;X;X;X;X;X;X;X;X;X	XXPPPPPPPPPPPPPPPPPPPPPPPPPXXXX	LEHSSFPEGPGPGS(1)GDEANGPR	LEHS(-53.46)S(-50.33)FPEGPGPGS(50.33)GDEANGPR	14	3	-1.6654																0.79113	0.83481	2.8468						1.2849
O15027-5;O15027;O15027-2;O15027-4;O15027-3	1895;1895;1895;1895;1895	O15027-5	O15027-5	Protein transport protein Sec16A	SEC16A	>sp|O15027-5|SC16A_HUMAN Isoform 5 of Protein transport protein Sec16A OS=Homo sapiens GN=SEC16A;>sp|O15027|SC16A_HUMAN Protein transport protein Sec16A OS=Homo sapiens GN=SEC16A PE=1 SV=3;>sp|O15027-2|SC16A_HUMAN Isoform 2 of Protein transport protein Sec	0.996293	24.2802	8.71252e-06	67.586	55.554	2	S	TVPDSEAPPGWDRADSGPTQPPLSLSPAPET	X;X;X;X;X;X;X;X;X;X;X;X;X;X;X;Phospho (STY);X;X;X;X;X;X;X;Phospho (STY);X;Phospho (STY);X;X;X;X;X	PPPPPPPPPPPPPPPPPPPPPPPPPPPPPPP	TVPDSEAPPGWDRADS(0.996)GPT(0.038)QPPLS(0.415)LS(0.415)PAPET(0.135)K	T(-55.11)VPDS(-44.56)EAPPGWDRADS(24.28)GPT(-10.8)QPPLS(0)LS(0)PAPET(-4.89)K	16	3	-0.24224				0.5639			0.68026	0.6471								0.69371						0.75145		0.61363	0.81744			0.47438
O15027-5;O15027;O15027-2;O15027-4;O15027-3	1903;1903;1903;1903;1903	O15027-5	O15027-5	Protein transport protein Sec16A	SEC16A	>sp|O15027-5|SC16A_HUMAN Isoform 5 of Protein transport protein Sec16A OS=Homo sapiens GN=SEC16A;>sp|O15027|SC16A_HUMAN Protein transport protein Sec16A OS=Homo sapiens GN=SEC16A PE=1 SV=3;>sp|O15027-2|SC16A_HUMAN Isoform 2 of Protein transport protein Sec	0.999924	41.2316	1.85716e-06	128.85	86.139	1;2	S	PGWDRADSGPTQPPLSLSPAPETKRPGQAAK	X;X;X;X;X;X;X;Phospho (STY);X;X;Phospho (STY);X;X;X;X;Phospho (STY);X;Phospho (STY);X;X;X;X;X;X;X;X;X;X;X;X;X	PPPPPPPPPPPPPPPPPPPPPPPPXXXXXXX	ADSGPTQPPLS(1)LS(1)PAPETK	ADS(-65.95)GPT(-41.23)QPPLS(41.23)LS(35.07)PAPET(-35.07)K	11	3	0.4755				0.5639			0.57746			0.82664				0.30532	0.68553	0.76764	1.0965			0.47098	0.53508	0.67569		0.45324	0.63692
O15027-5;O15027;O15027-2;O15027-4;O15027-3	1905;1905;1905;1905;1905	O15027-5	O15027-5	Protein transport protein Sec16A	SEC16A	>sp|O15027-5|SC16A_HUMAN Isoform 5 of Protein transport protein Sec16A OS=Homo sapiens GN=SEC16A;>sp|O15027|SC16A_HUMAN Protein transport protein Sec16A OS=Homo sapiens GN=SEC16A PE=1 SV=3;>sp|O15027-2|SC16A_HUMAN Isoform 2 of Protein transport protein Sec	0.999998	57.4931	2.53463e-41	188.49	142.65	1;2	S	WDRADSGPTQPPLSLSPAPETKRPGQAAKKE	X;X;X;X;X;Phospho (STY);X;X;X;X;X;X;X;Phospho (STY);X;Phospho (STY);X;X;X;X;X;X;X;X;X;X;X;X;X;X;X	PPPPPPPPPPPPPPPPPPPPPPXXXXXXXXX	ADSGPT(0.007)QPPLS(0.993)LS(1)PAPETK	ADS(-51.66)GPT(-21.76)QPPLS(21.76)LS(57.49)PAPET(-57.49)K	13	3	-0.061679	0.6484	0.63544	0.43949	0.54679	0.58512	0.87691	0.49594	0.8717	0.68267	0.41605	0.52074	0.38975		0.30532	0.8064	0.89122	0.73196	0.79213	0.70793	0.68578	0.73843	0.75845	0.82629	0.69405	0.93772	0.13485	0.64192	0.19276
O15027-5;O15027;O15027-2;O15027-4;O15027-3	779;779;779;779;779	O15027-5	O15027-5	Protein transport protein Sec16A	SEC16A	>sp|O15027-5|SC16A_HUMAN Isoform 5 of Protein transport protein Sec16A OS=Homo sapiens GN=SEC16A;>sp|O15027|SC16A_HUMAN Protein transport protein Sec16A OS=Homo sapiens GN=SEC16A PE=1 SV=3;>sp|O15027-2|SC16A_HUMAN Isoform 2 of Protein transport protein Sec	0.999481	34.4895	1.06034e-27	121.76	98.791	1	S	QKDRKAGSALPGFANSPAGSTSVVLVPPAHG	X;X;X;X;X;X;X;X;X;X;X;X;X;X;X;Phospho (STY);X;X;X;X;X;X;X;X;X;X;X;X;X;X;X	XXXXXPPPPPPPPPPPPPPPPPPPPPPPPPP	AGSALPGFANS(0.999)PAGSTSVVLVPPAHGTLVPDGNK	AGS(-47.52)ALPGFANS(34.49)PAGS(-34.49)T(-41.36)S(-41.36)VVLVPPAHGT(-89.8)LVPDGNK	11	3	0.70703	0.9739	0.73188	0.42047		0.70344		0.81467	0.64121	0.76037	0.63159	0.42802	0.25118	0.1583			0.75193		0.61076	0.75228	0.59887			0.74281		0.71818	0.46898	0.35782
O15027-5;O15027;O15027-2;O15027-4;O15027-3	783;783;783;783;783	O15027-5	O15027-5	Protein transport protein Sec16A	SEC16A	>sp|O15027-5|SC16A_HUMAN Isoform 5 of Protein transport protein Sec16A OS=Homo sapiens GN=SEC16A;>sp|O15027|SC16A_HUMAN Protein transport protein Sec16A OS=Homo sapiens GN=SEC16A PE=1 SV=3;>sp|O15027-2|SC16A_HUMAN Isoform 2 of Protein transport protein Sec	0.759211	7.33233	1.05413e-16	100.15	84.292	1	S	KAGSALPGFANSPAGSTSVVLVPPAHGTLVP	X;X;X;X;X;X;X;X;X;X;X;X;X;X;X;Phospho (STY);X;X;X;X;X;X;X;X;X;X;X;X;X;X;X	XPPPPPPPPPPPPPPPPPPPPPPPPPPPPPP	AGSALPGFANS(0.14)PAGS(0.759)T(0.05)S(0.05)VVLVPPAHGTLVPDGNK	AGS(-48.7)ALPGFANS(-7.33)PAGS(7.33)T(-11.79)S(-11.79)VVLVPPAHGT(-62.4)LVPDGNK	15	3	0.33464						0.84356
O15027-5;O15027;O15027-2;O15027-4;O15027-3	785;785;785;785;785	O15027-5	O15027-5	Protein transport protein Sec16A	SEC16A	>sp|O15027-5|SC16A_HUMAN Isoform 5 of Protein transport protein Sec16A OS=Homo sapiens GN=SEC16A;>sp|O15027|SC16A_HUMAN Protein transport protein Sec16A OS=Homo sapiens GN=SEC16A PE=1 SV=3;>sp|O15027-2|SC16A_HUMAN Isoform 2 of Protein transport protein Sec	0.466909	0.971737	3.44074e-08	79.82	79.82		S	GSALPGFANSPAGSTSVVLVPPAHGTLVPDG	X;X;X;X;X;X;X;X;X;X;X;X;X;X;X;Phospho (STY);X;X;X;X;X;X;X;X;X;X;X;X;X;X;X	PPPPPPPPPPPPPPPPPPPPPPPPPPPPPPP	AGS(0.001)ALPGFANS(0.041)PAGS(0.117)T(0.373)S(0.467)VVLVPPAHGTLVPDGNK	AGS(-26.21)ALPGFANS(-10.55)PAGS(-5.99)T(-0.97)S(0.97)VVLVPPAHGT(-37.13)LVPDGNK	17	3	-0.37525
O15027-5;O15027;O15027-2;O15027-4;O15027-3	891;891;891;891;891	O15027-5	O15027-5	Protein transport protein Sec16A	SEC16A	>sp|O15027-5|SC16A_HUMAN Isoform 5 of Protein transport protein Sec16A OS=Homo sapiens GN=SEC16A;>sp|O15027|SC16A_HUMAN Protein transport protein Sec16A OS=Homo sapiens GN=SEC16A PE=1 SV=3;>sp|O15027-2|SC16A_HUMAN Isoform 2 of Protein transport protein Sec	1	50.1893	8.2096e-05	150.13	114.09	1	S	LERAQQELVPPQQQASPPQLPKAMFSELSNP	X;X;X;X;X;X;X;X;X;X;X;X;X;X;X;Phospho (STY);X;X;X;X;X;X;X;X;X;X;X;X;X;X;X	PPPPPPPPPPPPPPPPPPPPPPXXXXXXXXX	DAQGQPGLERAQQELVPPQQQAS(1)PPQLPK	DAQGQPGLERAQQELVPPQQQAS(50.19)PPQLPK	23	4	0.031694	1.018	0.68997	0.38657	0.66234	0.64974	0.88265	0.69794	0.77216	0.78197	0.78777	0.8085	0.62316	0.75807	0.77971	0.56005	0.50201			0.32576	0.5214	0.53798	0.68071	0.70269	0.55508	0.60048	0.54542	0.71016	0.78731
O15027-5;O15027;O15027-2;O15027-4;O15027-3	1878;1878;1878;1878;1878	O15027-5	O15027-5	Protein transport protein Sec16A	SEC16A	>sp|O15027-5|SC16A_HUMAN Isoform 5 of Protein transport protein Sec16A OS=Homo sapiens GN=SEC16A;>sp|O15027|SC16A_HUMAN Protein transport protein Sec16A OS=Homo sapiens GN=SEC16A PE=1 SV=3;>sp|O15027-2|SC16A_HUMAN Isoform 2 of Protein transport protein Sec	0.945983	12.4335	9.74345e-05	96.171	58.622	1;2	S	LSEENFDGKFANLTPSRTVPDSEAPPGWDRA	X;X;X;X;X;X;X;X;X;X;X;X;X;X;X;Phospho (STY);X;X;X;X;X;Phospho (STY);X;X;X;X;X;X;X;X;X	XXXXXXXXXPPPPPPPPPPPPPPPPPPPPPP	FANLT(0.054)PS(0.946)R	FANLT(-12.43)PS(12.43)R	7	2	0.018261	0.87281					0.99804				0.67011											0.51057	0.59372	0.4975	0.48073	0.65948		0.34477	0.12846
O15027-5;O15027;O15027-2;O15027-4;O15027-3	1884;1884;1884;1884;1884	O15027-5	O15027-5	Protein transport protein Sec16A	SEC16A	>sp|O15027-5|SC16A_HUMAN Isoform 5 of Protein transport protein Sec16A OS=Homo sapiens GN=SEC16A;>sp|O15027|SC16A_HUMAN Protein transport protein Sec16A OS=Homo sapiens GN=SEC16A PE=1 SV=3;>sp|O15027-2|SC16A_HUMAN Isoform 2 of Protein transport protein Sec	0.491263	0.434474	0.000615347	46.847	33.082		S	DGKFANLTPSRTVPDSEAPPGWDRADSGPTQ	X;X;X;X;X;X;X;Phospho (STY);X;Phospho (STY);X;X;X;X;X;Phospho (STY);X;X;X;X;X;X;X;X;X;X;X;X;X;X;X	XXXXXXXXXXXPPPPPPPPPPPPPPPPPPPP	T(0.005)VPDS(0.491)EAPPGWDRADS(0.459)GPT(0.071)QPPLS(0.486)LS(0.486)PAPET(0.001)K	T(-20.33)VPDS(0.43)EAPPGWDRADS(-0.43)GPT(-10.55)QPPLS(0)LS(0)PAPET(-27.11)K	5	3	-0.086468
O15027-5;O15027;O15027-2;O15027-4;O15027-3	1149;1149;1149;1149;1149	O15027-5	O15027-5	Protein transport protein Sec16A	SEC16A	>sp|O15027-5|SC16A_HUMAN Isoform 5 of Protein transport protein Sec16A OS=Homo sapiens GN=SEC16A;>sp|O15027|SC16A_HUMAN Protein transport protein Sec16A OS=Homo sapiens GN=SEC16A PE=1 SV=3;>sp|O15027-2|SC16A_HUMAN Isoform 2 of Protein transport protein Sec	0.96358	14.2343	0.00197964	76.311	61.038	1	S	EKRDNNWRYDPRFTGSFDDDPDPHRDPYGEE	X;X;X;X;X;X;X;X;X;X;X;X;X;X;X;Phospho (STY);X;X;X;X;X;X;X;X;X;X;X;X;X;X;X	XXXXXXXXXXXXPPPPPPPPPPPPPPPPPPP	FT(0.036)GS(0.964)FDDDPDPHRDPYGEEVDRR	FT(-14.23)GS(14.23)FDDDPDPHRDPY(-41.15)GEEVDRR	4	4	-0.49694					0.97425	0.98142
O15027-5;O15027;O15027-2;O15027-4;O15027-3	411;411;411;411;411	O15027-5	O15027-5	Protein transport protein Sec16A	SEC16A	>sp|O15027-5|SC16A_HUMAN Isoform 5 of Protein transport protein Sec16A OS=Homo sapiens GN=SEC16A;>sp|O15027|SC16A_HUMAN Protein transport protein Sec16A OS=Homo sapiens GN=SEC16A PE=1 SV=3;>sp|O15027-2|SC16A_HUMAN Isoform 2 of Protein transport protein Sec	0.874992	10.9345	8.44155e-06	74.874	56.112	3	S	ETDETTVSQNYRGSVSQPSTPSPPKPTGIFQ	X;Phospho (STY);X;X;X;X;X;X;X;X;X;X;X;X;X;Phospho (STY);X;X;Phospho (STY);Phospho (STY);X;Phospho (STY);X;X;X;X;Phospho (STY);X;X;X;X	XXXXXXXXXXXXPPPPPPPPPPPPPPPPPPP	GS(0.078)VS(0.875)QPS(0.458)T(0.557)PS(0.716)PPKPT(0.187)GIFQT(0.051)S(0.049)ANS(0.024)S(0.005)FEPVK	GS(-10.93)VS(10.93)QPS(-0.79)T(0.79)PS(6.43)PPKPT(-6.43)GIFQT(-12.43)S(-12.76)ANS(-17.72)S(-26.01)FEPVK	4	3	-0.062165																	0.15117
O15027-5;O15027;O15027-2;O15027-4;O15027-3	414;414;414;414;414	O15027-5	O15027-5	Protein transport protein Sec16A	SEC16A	>sp|O15027-5|SC16A_HUMAN Isoform 5 of Protein transport protein Sec16A OS=Homo sapiens GN=SEC16A;>sp|O15027|SC16A_HUMAN Protein transport protein Sec16A OS=Homo sapiens GN=SEC16A PE=1 SV=3;>sp|O15027-2|SC16A_HUMAN Isoform 2 of Protein transport protein Sec	0.887359	9.22489	8.44155e-06	74.874	56.112	3	S	ETTVSQNYRGSVSQPSTPSPPKPTGIFQTSA	X;X;X;X;X;X;X;X;X;X;X;X;Phospho (STY);X;X;Phospho (STY);X;X;Phospho (STY);X;X;X;X;Phospho (STY);X;X;X;X;X;X;X	XXXXXXXXXPPPPPPPPPPPPPPPPPPPPPP	GS(0.45)VS(0.526)QPS(0.887)T(0.161)PS(0.951)PPKPT(0.014)GIFQT(0.002)S(0.002)ANS(0.002)S(0.004)FEPVK	GS(-0.73)VS(0.73)QPS(9.22)T(-9.22)PS(15.19)PPKPT(-19.41)GIFQT(-29.63)S(-29.79)ANS(-29.94)S(-27.41)FEPVK	7	3	0.38102
O15027-5;O15027;O15027-2;O15027-4;O15027-3	417;417;417;417;417	O15027-5	O15027-5	Protein transport protein Sec16A	SEC16A	>sp|O15027-5|SC16A_HUMAN Isoform 5 of Protein transport protein Sec16A OS=Homo sapiens GN=SEC16A;>sp|O15027|SC16A_HUMAN Protein transport protein Sec16A OS=Homo sapiens GN=SEC16A PE=1 SV=3;>sp|O15027-2|SC16A_HUMAN Isoform 2 of Protein transport protein Sec	0.987671	21.1956	8.44155e-06	74.874	56.112	3	S	VSQNYRGSVSQPSTPSPPKPTGIFQTSANSS	X;X;X;X;X;X;X;X;X;Phospho (STY);X;X;Phospho (STY);Phospho (STY);X;Phospho (STY);X;X;X;X;X;X;X;X;X;X;X;X;X;X;X	XXXXXXPPPPPPPPPPPPPPPPPPPPPPPPP	GS(0.195)VS(0.784)QPS(0.304)T(0.722)PS(0.988)PPKPT(0.007)GIFQTSANSSFEPVK	GS(-6.12)VS(6.12)QPS(-4.04)T(4.04)PS(21.2)PPKPT(-23.3)GIFQT(-42)S(-42.23)ANS(-42.46)S(-42.23)FEPVK	10	3	-0.16952																	0.15117
O15027-5;O15027;O15027-2;O15027-4;O15027-3	1844;1844;1844;1844;1844	O15027-5	O15027-5	Protein transport protein Sec16A	SEC16A	>sp|O15027-5|SC16A_HUMAN Isoform 5 of Protein transport protein Sec16A OS=Homo sapiens GN=SEC16A;>sp|O15027|SC16A_HUMAN Protein transport protein Sec16A OS=Homo sapiens GN=SEC16A PE=1 SV=3;>sp|O15027-2|SC16A_HUMAN Isoform 2 of Protein transport protein Sec	1	73.096	5.62589e-19	103.4	87.741	1	S	VPPLQERRHLLQEARSPDPGIVPQEAPVGNS	X;X;X;X;X;X;X;X;X;X;X;X;X;X;X;Phospho (STY);X;X;X;X;X;X;X;X;X;X;X;X;X;X;X	XXXXXXXXPPPPPPPPPPPPPPPPPPPPPPP	HLLQEARS(1)PDPGIVPQEAPVGNSLSELSEENFDGK	HLLQEARS(73.1)PDPGIVPQEAPVGNS(-73.1)LS(-81.2)ELS(-93.81)EENFDGK	8	4	0.020655	1.226			0.68649	0.72657	0.85627			1.0808			0.70505	0.38679	0.16861			0.74375	1.6186	1.0375	0.7868			0.9977		1.0402	0.83578	0.84209
O15027-5;O15027;O15027-2;O15027-4;O15027-3	136;136;136;136;136	O15027-5	O15027-5	Protein transport protein Sec16A	SEC16A	>sp|O15027-5|SC16A_HUMAN Isoform 5 of Protein transport protein Sec16A OS=Homo sapiens GN=SEC16A;>sp|O15027|SC16A_HUMAN Protein transport protein Sec16A OS=Homo sapiens GN=SEC16A PE=1 SV=3;>sp|O15027-2|SC16A_HUMAN Isoform 2 of Protein transport protein Sec	1	103.725	6.78505e-05	203.61	118.26	1	S	ESTFRQNPRIVNHWASPELRQNPGVKNEHRP	X;X;X;X;X;X;X;X;X;X;X;X;X;X;X;Phospho (STY);X;X;X;X;X;X;X;X;X;X;X;X;X;X;X	XXXXXXXXXPPPPPPPPPPPPPPPPPXXXXX	IVNHWAS(1)PELRQNPGVK	IVNHWAS(103.73)PELRQNPGVK	7	4	-0.02977				0.47892	0.66374	0.75652			0.71881	0.8441										0.34002			0.71982	0.60773
O15027-5;O15027;O15027-2;O15027-4;O15027-3	1786;1786;1786;1786;1786	O15027-5	O15027-5	Protein transport protein Sec16A	SEC16A	>sp|O15027-5|SC16A_HUMAN Isoform 5 of Protein transport protein Sec16A OS=Homo sapiens GN=SEC16A;>sp|O15027|SC16A_HUMAN Protein transport protein Sec16A OS=Homo sapiens GN=SEC16A PE=1 SV=3;>sp|O15027-2|SC16A_HUMAN Isoform 2 of Protein transport protein Sec	1	77.7982	4.52112e-05	167.03	134.73	1	S	LLPSAPQTLPDGPLASPARVPMFPVPLPPGP	X;X;X;X;X;X;X;X;X;X;X;X;X;X;X;Phospho (STY);X;X;X;X;X;X;X;X;X;X;X;X;X;X;X	PPPPPPPPPPPPPPPPPPPXXXXXXXXXXXX	LLPSAPQTLPDGPLAS(1)PAR	LLPS(-90.16)APQT(-77.8)LPDGPLAS(77.8)PAR	16	3	-0.115	0.75219	0.6632	0.29029			0.63307			0.50522	0.72446					0.92079	0.90939	0.84019	1.8018			1.1616
O15027-5	2074	O15027-5	O15027-5	Protein transport protein Sec16A	SEC16A	>sp|O15027-5|SC16A_HUMAN Isoform 5 of Protein transport protein Sec16A OS=Homo sapiens GN=SEC16A	0.922647	10.8702	5.50659e-18	135.02	103.1	1	S	RPQGRSGRNDGLLALSSPDAEEPQLPDGTGR	X;X;X;X;X;X;X;X;X;X;X;X;X;X;X;Phospho (STY);X;X;X;X;X;X;X;X;X;X;X;X;X;X;X	XXXXXPPPPPPPPPPPPPPPPPPPPPPPPPP	S(0.002)GRNDGLLALS(0.923)S(0.076)PDAEEPQLPDGTGR	S(-27)GRNDGLLALS(10.87)S(-10.87)PDAEEPQLPDGT(-101.17)GR	11	3	0.22041											0.4768
O15027-5	2075	O15027-5	O15027-5	Protein transport protein Sec16A	SEC16A	>sp|O15027-5|SC16A_HUMAN Isoform 5 of Protein transport protein Sec16A OS=Homo sapiens GN=SEC16A	0.960174	14.406	6.78773e-26	149.9	117.53	1	S	PQGRSGRNDGLLALSSPDAEEPQLPDGTGRE	X;X;X;X;X;X;X;X;X;X;X;X;X;X;X;Phospho (STY);X;X;X;X;X;X;X;X;X;X;X;X;X;X;X	XXXXPPPPPPPPPPPPPPPPPPPPPPPPPPX	S(0.005)GRNDGLLALS(0.035)S(0.96)PDAEEPQLPDGTGR	S(-22.83)GRNDGLLALS(-14.41)S(14.41)PDAEEPQLPDGT(-54.96)GR	12	3	0.28638										0.69748					0.82928									0.42489				0.70491
O15027-5;O15027;O15027-2;O15027-4;O15027-3	390;390;390;390;390	O15027-5	O15027-5	Protein transport protein Sec16A	SEC16A	>sp|O15027-5|SC16A_HUMAN Isoform 5 of Protein transport protein Sec16A OS=Homo sapiens GN=SEC16A;>sp|O15027|SC16A_HUMAN Protein transport protein Sec16A OS=Homo sapiens GN=SEC16A PE=1 SV=3;>sp|O15027-2|SC16A_HUMAN Isoform 2 of Protein transport protein Sec	0.920107	10.6134	3.095e-72	205.02	174.09	1	S	KPEDEASGSFFKQIDSSPVGGETDETTVSQN	X;X;X;X;X;X;X;X;X;X;X;X;X;X;X;Phospho (STY);X;X;X;X;X;X;X;X;X;X;X;X;X;X;X	XXXXXXXXXXXXPPPPPPPPPPPPPPPPPPP	QIDS(0.92)S(0.08)PVGGETDETTVSQNYR	QIDS(10.61)S(-10.61)PVGGET(-60.12)DET(-74.29)T(-78.64)VS(-93.01)QNY(-101.53)R	4	2	-0.21047										0.8442					0.81332	0.91097		0.83836	0.68731	0.82058		0.92272		0.74768				0.52171
O15027-5;O15027;O15027-2;O15027-4;O15027-3	391;391;391;391;391	O15027-5	O15027-5	Protein transport protein Sec16A	SEC16A	>sp|O15027-5|SC16A_HUMAN Isoform 5 of Protein transport protein Sec16A OS=Homo sapiens GN=SEC16A;>sp|O15027|SC16A_HUMAN Protein transport protein Sec16A OS=Homo sapiens GN=SEC16A PE=1 SV=3;>sp|O15027-2|SC16A_HUMAN Isoform 2 of Protein transport protein Sec	0.999645	34.4903	2.13039e-89	222.25	175.37	1	S	PEDEASGSFFKQIDSSPVGGETDETTVSQNY	X;X;X;X;X;X;X;X;X;X;X;X;X;X;X;Phospho (STY);X;X;X;X;X;X;X;X;X;X;X;X;X;X;X	XXXXXXXXXXXPPPPPPPPPPPPPPPPPPPP	QIDSS(1)PVGGETDETTVSQNYR	QIDS(-34.49)S(34.49)PVGGET(-82.75)DET(-111.04)T(-109.2)VS(-149.79)QNY(-201.83)R	5	2	0.20667	1.0042		0.44683	0.57583	0.57403	0.78462	0.53774	0.84808	0.81953		0.71528	0.65334	0.76222	0.73357	0.8747	0.90425	0.73709	2.37		0.77569	0.84372	0.86781	0.74108	0.86032	0.81147	0.36754	0.83574	0.51461
O15027-5;O15027;O15027-2;O15027-4;O15027-3	1258;1258;1258;1258;1258	O15027-5	O15027-5	Protein transport protein Sec16A	SEC16A	>sp|O15027-5|SC16A_HUMAN Isoform 5 of Protein transport protein Sec16A OS=Homo sapiens GN=SEC16A;>sp|O15027|SC16A_HUMAN Protein transport protein Sec16A OS=Homo sapiens GN=SEC16A PE=1 SV=3;>sp|O15027-2|SC16A_HUMAN Isoform 2 of Protein transport protein Sec	0.730603	6.0258	8.85523e-06	62.706	48.901	1	S	YGYPADTVWPAMEQVSSRPTSPEKFSVPHVC	X;X;X;X;X;X;X;X;X;X;X;X;X;X;X;Phospho (STY);X;X;X;X;X;X;X;X;X;X;X;X;X;X;X	PPPPPPPPPPPPPPPPPPPPPPPPXXXXXXX	SNFSSGPGFPEY(0.001)GYPADT(0.013)VWPAMEQVS(0.731)S(0.182)RPT(0.036)S(0.036)PEK	S(-55.24)NFS(-58.87)S(-57.24)GPGFPEY(-31.48)GY(-36.02)PADT(-17.36)VWPAMEQVS(6.03)S(-6.03)RPT(-13.02)S(-13.02)PEK	27	3	0.81372
O15027-5;O15027;O15027-2;O15027-4;O15027-3	1259;1259;1259;1259;1259	O15027-5	O15027-5	Protein transport protein Sec16A	SEC16A	>sp|O15027-5|SC16A_HUMAN Isoform 5 of Protein transport protein Sec16A OS=Homo sapiens GN=SEC16A;>sp|O15027|SC16A_HUMAN Protein transport protein Sec16A OS=Homo sapiens GN=SEC16A PE=1 SV=3;>sp|O15027-2|SC16A_HUMAN Isoform 2 of Protein transport protein Sec	0.355949	0	5.16368e-05	51.125	38.661		S	GYPADTVWPAMEQVSSRPTSPEKFSVPHVCA	X;X;X;X;X;X;X;X;X;X;X;X;X;X;X;Phospho (STY);X;X;X;X;X;X;X;X;X;X;X;X;X;X;X	PPPPPPPPPPPPPPPPPPPPPPPXXXXXXXX	SNFSSGPGFPEY(0.001)GY(0.003)PADT(0.066)VWPAMEQVS(0.356)S(0.356)RPT(0.109)S(0.109)PEK	S(-50.7)NFS(-50.09)S(-47.77)GPGFPEY(-24.99)GY(-21.12)PADT(-7.33)VWPAMEQVS(0)S(0)RPT(-5.13)S(-5.13)PEK	28	3	0.22539
O15027-5;O15027;O15027-2;O15027-4;O15027-3	1263;1263;1263;1263;1263	O15027-5	O15027-5	Protein transport protein Sec16A	SEC16A	>sp|O15027-5|SC16A_HUMAN Isoform 5 of Protein transport protein Sec16A OS=Homo sapiens GN=SEC16A;>sp|O15027|SC16A_HUMAN Protein transport protein Sec16A OS=Homo sapiens GN=SEC16A PE=1 SV=3;>sp|O15027-2|SC16A_HUMAN Isoform 2 of Protein transport protein Sec	0.537959	4.51084	1.59672e-05	57.043	45.547	1	S	DTVWPAMEQVSSRPTSPEKFSVPHVCARFGP	X;X;X;X;X;X;X;X;X;X;X;X;X;X;X;Phospho (STY);X;X;X;X;X;X;X;X;X;X;X;X;X;X;X	PPPPPPPPPPPPPPPPPPPXXXXXXXXXXXX	SNFSSGPGFPEYGYPADTVWPAMEQVS(0.19)S(0.19)RPT(0.081)S(0.538)PEK	S(-54.43)NFS(-54.43)S(-52.08)GPGFPEY(-37.6)GY(-38.11)PADT(-30.83)VWPAMEQVS(-4.51)S(-4.51)RPT(-8.24)S(4.51)PEK	32	3	0.77881																		1.0058			0.9986	0.85523	0.96359	0.8579	1.2419	1.5288	1.2734	0.96814
O15042;O15042-2	67;67	O15042	O15042	U2 snRNP-associated SURP motif-containing protein	U2SURP	>sp|O15042|SR140_HUMAN U2 snRNP-associated SURP motif-containing protein OS=Homo sapiens GN=U2SURP PE=1 SV=2;>sp|O15042-2|SR140_HUMAN Isoform 2 of U2 snRNP-associated SURP motif-containing protein OS=Homo sapiens GN=U2SURP	1	66.0326	1.02988e-09	162.26	120.68	1	S	KHNYRNESARESLCDSPHQNLSRPLLENKLK	X;X;X;X;X;X;X;X;X;X;X;X;X;X;X;Phospho (STY);X;X;X;X;X;X;X;X;X;X;X;X;X;X;X	XXXXXXXXXXPPPPPPPPPPPPPPPPPPPXX	ESLCDS(1)PHQNLSRPLLENK	ES(-69.16)LCDS(66.03)PHQNLS(-66.03)RPLLENK	6	4	0.04991	0.99791	0.69998	0.37694	0.62725	0.52361	0.56673	0.35596	0.29606	0.043464						0.8628	0.77744	0.72293	0.65246	0.62253	0.45395	0.39346	0.4643	0.4142	0.23361	0.20445	0.011139	0.014772
O15042;O15042-2	73;73	O15042	O15042	U2 snRNP-associated SURP motif-containing protein	U2SURP	>sp|O15042|SR140_HUMAN U2 snRNP-associated SURP motif-containing protein OS=Homo sapiens GN=U2SURP PE=1 SV=2;>sp|O15042-2|SR140_HUMAN Isoform 2 of U2 snRNP-associated SURP motif-containing protein OS=Homo sapiens GN=U2SURP	0.831041	7.74638	0.00158406	58.835	31.824	1	S	ESARESLCDSPHQNLSRPLLENKLKAFSIGK	X;X;X;X;X;X;X;X;X;X;X;X;X;X;X;Phospho (STY);X;X;X;X;X;X;X;X;X;X;X;X;X;X;X	XXXXPPPPPPPPPPPPPPPPPPPXXXXXXXX	ES(0.029)LCDS(0.14)PHQNLS(0.831)RPLLENK	ES(-14.52)LCDS(-7.75)PHQNLS(7.75)RPLLENK	12	3	0.051984							0.52343
O15042;O15042-2;O15042-3	485;484;76	O15042	O15042	U2 snRNP-associated SURP motif-containing protein	U2SURP	>sp|O15042|SR140_HUMAN U2 snRNP-associated SURP motif-containing protein OS=Homo sapiens GN=U2SURP PE=1 SV=2;>sp|O15042-2|SR140_HUMAN Isoform 2 of U2 snRNP-associated SURP motif-containing protein OS=Homo sapiens GN=U2SURP;>sp|O15042-3|SR140_HUMAN Isoform	0.999965	44.5786	4.16565e-24	181.51	153.55	1	S	HVYYRWKLYSILQGDSPTKWRTEDFRMFKNG	X;X;X;X;X;X;X;X;X;X;X;X;X;X;X;Phospho (STY);X;X;X;X;X;X;X;X;X;X;X;X;X;X;X	XXXXXXXPPPPPPPPPPPPXXXXXXXXXXXX	LYSILQGDS(1)PTK	LY(-132.23)S(-62.8)ILQGDS(44.58)PT(-44.58)K	9	2	0.2217	0.69537	0.67917	0.44225	0.6842	0.58708	0.83824	0.5552	0.75592	0.71365	0.72826	0.64092	0.72605	0.77478	0.62513	0.66523	0.7349	0.64615	0.80923	0.69107	0.50134	0.59007	0.675	0.68263	0.52445	0.62999	0.40607	1.0161	0.58865
O15042;O15042-2	18;18	O15042	O15042	U2 snRNP-associated SURP motif-containing protein	U2SURP	>sp|O15042|SR140_HUMAN U2 snRNP-associated SURP motif-containing protein OS=Homo sapiens GN=U2SURP PE=1 SV=2;>sp|O15042-2|SR140_HUMAN Isoform 2 of U2 snRNP-associated SURP motif-containing protein OS=Homo sapiens GN=U2SURP	0.43755	0	0.00036487	56.172	37.927		S	DKTPGGSQKASSKTRSSDVHSSGSSDAHMDA	X;X;X;X;X;X;X;X;X;X;X;X;X;X;X;Phospho (STY);X;X;X;X;X;X;X;X;X;X;X;X;X;X;X	XXXXXXXXXXXXXPPPPPPPPPPPPPPPPPP	T(0.438)RS(0.438)S(0.117)DVHS(0.002)S(0.002)GS(0.002)S(0.002)DAHMDASGPSDSDMPSR	T(0)RS(0)S(-5.71)DVHS(-23.86)S(-23.86)GS(-23.86)S(-23.86)DAHMDAS(-34.17)GPS(-40.01)DS(-42.4)DMPS(-47.2)R	3	4	-0.26748
O15042;O15042-2	19;19	O15042	O15042	U2 snRNP-associated SURP motif-containing protein	U2SURP	>sp|O15042|SR140_HUMAN U2 snRNP-associated SURP motif-containing protein OS=Homo sapiens GN=U2SURP PE=1 SV=2;>sp|O15042-2|SR140_HUMAN Isoform 2 of U2 snRNP-associated SURP motif-containing protein OS=Homo sapiens GN=U2SURP	0.434164	0	0.000537564	56.172	37.927		S	KTPGGSQKASSKTRSSDVHSSGSSDAHMDAS	X;X;X;X;X;X;X;X;X;X;X;X;X;X;X;X;X;X;X;X;X;X;X;X;X;X;X;X;X;X;X	XXXXXXXXXXXXXXXXXXXXXXXXXXXXXXX	T(0.027)RS(0.434)S(0.434)DVHS(0.041)S(0.041)GS(0.011)S(0.011)DAHMDASGPSDSDMPSR	T(-12.01)RS(0)S(0)DVHS(-10.23)S(-10.23)GS(-15.96)S(-15.96)DAHMDAS(-45.24)GPS(-54.17)DS(-54.07)DMPS(-55.8)R	4	4	0.087655
O15047	565	O15047	O15047	Histone-lysine N-methyltransferase SETD1A	SETD1A	>sp|O15047|SET1A_HUMAN Histone-lysine N-methyltransferase SETD1A OS=Homo sapiens GN=SETD1A PE=1 SV=3	0.484739	0	0.000523019	42.387	42.387		S	DVAPTGSGEPGATRESPKANGQNQASPCSSG	X;X;X;X;X;X;X;X;X;X;X;X;X;X;X;X;X;X;X;X;X;X;X;X;X;X;X;X;X;X;X	XXXXXXXXXXXXXXXXXXXXXXXXXXXXXXX	DT(0.002)GS(0.002)EVPS(0.096)GS(0.242)GHGPCT(0.638)PPPAPANFEDVAPT(0.02)GS(0.029)GEPGAT(0.485)RES(0.485)PK	DT(-24.59)GS(-24.59)EVPS(-8.25)GS(-4.22)GHGPCT(4.22)PPPAPANFEDVAPT(-17.4)GS(-13.83)GEPGAT(0)RES(0)PK	41	4	0.95859
O15047	915	O15047	O15047	Histone-lysine N-methyltransferase SETD1A	SETD1A	>sp|O15047|SET1A_HUMAN Histone-lysine N-methyltransferase SETD1A OS=Homo sapiens GN=SETD1A PE=1 SV=3	0.642032	2.53713	2.10468e-06	125.41	87.492	1	S	PSEISEASEEKRPRPSTPAEEDEDDPEQEKE	X;X;X;X;X;X;X;X;X;X;X;X;X;X;X;Phospho (STY);X;X;X;X;X;X;X;X;X;X;X;X;X;X;X	XXXXXXXXXXXPPPPPPPPPPPPPPPPPPPX	RPRPS(0.642)T(0.358)PAEEDEDDPEQEK	RPRPS(2.54)T(-2.54)PAEEDEDDPEQEK	5	3	0.058498	1.047	1.2834			1.1383	0.83745	0.75412		1.1488				0.8563	0.78368			0.85547			0.46105	0.61159	0.74431		0.74307	0.90589	0.77276	0.893	0.60631
O15047	468	O15047	O15047	Histone-lysine N-methyltransferase SETD1A	SETD1A	>sp|O15047|SET1A_HUMAN Histone-lysine N-methyltransferase SETD1A OS=Homo sapiens GN=SETD1A PE=1 SV=3	0.498662	0	5.29922e-07	92.613	64.203		S	REEVRTSPRPASPARSGSPAPETTNESVPFA	X;X;X;X;X;X;X;X;X;X;X;X;X;X;X;Phospho (STY);X;X;X;X;X;X;X;X;X;X;X;X;X;X;X	XXXXXXXXXXXXXXXPPPPPPPPPPPPPPPP	S(0.499)GS(0.499)PAPET(0.001)T(0.001)NESVPFAQHSSLDSR	S(0)GS(0)PAPET(-25.88)T(-25.88)NES(-36.91)VPFAQHS(-82.42)S(-82.42)LDS(-90.03)R	1	3	-0.17682
O15047	470	O15047	O15047	Histone-lysine N-methyltransferase SETD1A	SETD1A	>sp|O15047|SET1A_HUMAN Histone-lysine N-methyltransferase SETD1A OS=Homo sapiens GN=SETD1A PE=1 SV=3	0.920315	11.1808	6.30302e-08	112.82	85.147	1	S	EVRTSPRPASPARSGSPAPETTNESVPFAQH	X;X;X;X;X;X;X;X;X;X;X;X;X;X;X;Phospho (STY);X;X;X;X;X;X;X;X;X;X;X;X;X;X;X	XXXXXXXXXXXXXPPPPPPPPPPPPPPPPPP	S(0.07)GS(0.92)PAPET(0.007)T(0.003)NESVPFAQHSSLDSR	S(-11.18)GS(11.18)PAPET(-21.29)T(-25.42)NES(-40.54)VPFAQHS(-65.69)S(-65.69)LDS(-69.71)R	3	3	0.47261	0.88393	0.71533		0.55761	0.69318	0.76373							0.67107		0.97963	0.59658	0.55077	0.99908	0.61109	0.57666		0.70353	0.66709	0.52387	0.75605	0.52436	0.94478	0.60415
O15061;O15061-2	1044;1044	O15061	O15061	Synemin	SYNM	>sp|O15061|SYNEM_HUMAN Synemin OS=Homo sapiens GN=SYNM PE=1 SV=2;>sp|O15061-2|SYNEM_HUMAN Isoform 2 of Synemin OS=Homo sapiens GN=SYNM	1	51.4307	0.00371021	51.431	34.712	2	S	KAVESVVRESLSRQRSPAPGSPDEEGGAEAP	X;X;X;X;X;X;X;X;X;X;X;X;X;X;X;Phospho (STY);X;X;X;X;Phospho (STY);X;X;X;X;X;X;X;X;X;X	XXXXXXXXXXXXXPPPPPPPPPPPPPPPPPP	QRS(1)PAPGS(1)PDEEGGAEAPAAGIR	QRS(51.43)PAPGS(51.43)PDEEGGAEAPAAGIR	3	3	0.53751
O15061;O15061-2	1049;1049	O15061	O15061	Synemin	SYNM	>sp|O15061|SYNEM_HUMAN Synemin OS=Homo sapiens GN=SYNM PE=1 SV=2;>sp|O15061-2|SYNEM_HUMAN Isoform 2 of Synemin OS=Homo sapiens GN=SYNM	1	51.4307	0.00371021	51.431	34.712	2	S	VVRESLSRQRSPAPGSPDEEGGAEAPAAGIR	X;X;X;X;X;X;X;X;X;X;Phospho (STY);X;X;X;X;Phospho (STY);X;X;X;X;X;X;X;X;X;X;X;X;X;X;X	XXXXXXXXPPPPPPPPPPPPPPPPPPPPPPP	QRS(1)PAPGS(1)PDEEGGAEAPAAGIR	QRS(51.43)PAPGS(51.43)PDEEGGAEAPAAGIR	8	3	0.53751
O15061	1435	O15061	O15061	Synemin	SYNM	>sp|O15061|SYNEM_HUMAN Synemin OS=Homo sapiens GN=SYNM PE=1 SV=2	0.99993	41.5724	1.43678e-37	180.03	143.08	1	S	RGPVSRTFVLAGSADSPELGKLADSSRTLRH	X;X;X;X;X;X;X;X;X;X;X;X;X;X;X;Phospho (STY);X;X;X;X;X;X;X;X;X;X;X;X;X;X;X	XXXXXXPPPPPPPPPPPPPPPXXXXXXXXXX	TFVLAGSADS(1)PELGK	T(-143.91)FVLAGS(-41.57)ADS(41.57)PELGK	10	2	0.29436
O15063	723	O15063	O15063	Uncharacterized protein KIAA0355	KIAA0355	>sp|O15063|K0355_HUMAN Uncharacterized protein KIAA0355 OS=Homo sapiens GN=KIAA0355 PE=1 SV=2	1	79.3974	3.76287e-05	88.872	45.061	1	S	HTPLTPQPGLAPQQQSPKQQQPQVQYYQHLL	X;X;X;X;X;X;X;X;X;X;X;X;X;X;X;Phospho (STY);X;X;X;X;X;X;X;X;X;X;X;X;X;X;X	PPPPPPPPPPPPPPPPPPXXXXXXXXXXXXX	APQAGAHTPLTPQPGLAPQQQS(1)PK	APQAGAHT(-84.02)PLT(-79.4)PQPGLAPQQQS(79.4)PK	22	3	-0.74885
O15069	1538	O15069	O15069	NAC-alpha domain-containing protein 1	NACAD	>sp|O15069|NACAD_HUMAN NAC-alpha domain-containing protein 1 OS=Homo sapiens GN=NACAD PE=1 SV=3	1	220.499	0.00298058	220.5	12.324	1	S	LELRDIELVMAQANVSRAKAVRALRDNHSDI	X;X;X;X;X;X;X;X;X;Oxidation (M);X;X;X;X;X;Phospho (STY);X;X;X;X;X;X;X;X;X;X;X;X;X;X;X	XXXXPPPPPPPPPPPPPPPXXXXXXXXXXXX	DIELVMAQANVS(1)RAK	DIELVMAQANVS(220.5)RAK	12	3	-0.1173
O15085;O15085-2	251;291	O15085	O15085	Rho guanine nucleotide exchange factor 11	ARHGEF11	>sp|O15085|ARHGB_HUMAN Rho guanine nucleotide exchange factor 11 OS=Homo sapiens GN=ARHGEF11 PE=1 SV=1;>sp|O15085-2|ARHGB_HUMAN Isoform 2 of Rho guanine nucleotide exchange factor 11 OS=Homo sapiens GN=ARHGEF11	0.989579	19.2711	0.000406037	79.332	34.793	2	S	SLMNRNSVLSDPGLDSPRTSPVIMARVAQHH	X;X;X;X;X;X;X;X;X;X;X;X;X;X;X;Phospho (STY);X;X;Phospho (STY);Phospho (STY);X;X;X;X;X;X;X;X;X;X;X	XXXXXPPPPPPPPPPPPPPPPPPPPPXXXXX	NSVLS(0.003)DPGLDS(0.99)PRT(0.804)S(0.203)PVIMAR	NS(-57.55)VLS(-25.7)DPGLDS(19.27)PRT(6.13)S(-6.13)PVIMAR	11	3	-0.12633		1.2573	0.5051	0.87143												0.66611		0.35246						0.61826
O15085;O15085-2	255;295	O15085	O15085	Rho guanine nucleotide exchange factor 11	ARHGEF11	>sp|O15085|ARHGB_HUMAN Rho guanine nucleotide exchange factor 11 OS=Homo sapiens GN=ARHGEF11 PE=1 SV=1;>sp|O15085-2|ARHGB_HUMAN Isoform 2 of Rho guanine nucleotide exchange factor 11 OS=Homo sapiens GN=ARHGEF11	0.852257	7.03547	0.000406037	79.332	34.793	2	S	RNSVLSDPGLDSPRTSPVIMARVAQHHRRQG	X;X;X;X;X;Phospho (STY);X;X;X;X;X;Phospho (STY);X;X;X;Phospho (STY);X;X;X;X;X;X;X;X;X;X;X;X;X;X;X	XPPPPPPPPPPPPPPPPPPPPPXXXXXXXXX	NSVLS(0.041)DPGLDS(0.828)PRT(0.279)S(0.852)PVIMAR	NS(-45.78)VLS(-13.75)DPGLDS(7.04)PRT(-7.04)S(7.04)PVIMAR	15	3	-0.82565		1.2573	0.5051	0.87143												0.66611		0.35246						0.61826
O15085;O15085-2	1457;1497	O15085	O15085	Rho guanine nucleotide exchange factor 11	ARHGEF11	>sp|O15085|ARHGB_HUMAN Rho guanine nucleotide exchange factor 11 OS=Homo sapiens GN=ARHGEF11 PE=1 SV=1;>sp|O15085-2|ARHGB_HUMAN Isoform 2 of Rho guanine nucleotide exchange factor 11 OS=Homo sapiens GN=ARHGEF11	0.827336	9.74231	0.000120094	72.359	51.835	2	S	MELAHRELLKSLGGESSGGTTPVGSFHTEAA	X;X;X;X;X;X;X;X;X;X;X;X;X;X;X;Phospho (STY);Phospho (STY);X;X;Phospho (STY);X;X;X;X;X;X;X;X;X;X;X	XXXXXXXXXXPPPPPPPPPPPPPPPPPPPPP	S(0.013)LGGES(0.827)S(0.827)GGT(0.166)T(0.166)PVGSFHTEAAR	S(-20.79)LGGES(9.74)S(9.74)GGT(-9.74)T(-9.74)PVGS(-43.87)FHT(-56.72)EAAR	6	3	-0.032416															1.0505									0.6731	0.46433	0.48177		0.32877
O15085;O15085-2	1458;1498	O15085	O15085	Rho guanine nucleotide exchange factor 11	ARHGEF11	>sp|O15085|ARHGB_HUMAN Rho guanine nucleotide exchange factor 11 OS=Homo sapiens GN=ARHGEF11 PE=1 SV=1;>sp|O15085-2|ARHGB_HUMAN Isoform 2 of Rho guanine nucleotide exchange factor 11 OS=Homo sapiens GN=ARHGEF11	0.992501	22.0421	0.000104472	170.66	135.91	1;2	S	ELAHRELLKSLGGESSGGTTPVGSFHTEAAR	X;X;X;X;X;X;X;X;X;X;X;X;X;X;Phospho (STY);Phospho (STY);X;X;X;X;X;X;X;X;X;X;X;X;X;X;X	XXXXXXXXXPPPPPPPPPPPPPPPPPPPPPP	SLGGES(0.006)S(0.993)GGT(0.001)TPVGSFHTEAAR	S(-79.34)LGGES(-22.04)S(22.04)GGT(-29.29)T(-39.34)PVGS(-49.1)FHT(-96.01)EAAR	7	3	0.27192															1.0505									0.6731	0.46433	0.48177		0.32877
O15085;O15085-2	556;596	O15085	O15085	Rho guanine nucleotide exchange factor 11	ARHGEF11	>sp|O15085|ARHGB_HUMAN Rho guanine nucleotide exchange factor 11 OS=Homo sapiens GN=ARHGEF11 PE=1 SV=1;>sp|O15085-2|ARHGB_HUMAN Isoform 2 of Rho guanine nucleotide exchange factor 11 OS=Homo sapiens GN=ARHGEF11	0.989556	25.158	0.000474268	60.388	41.332	1	S	GKPKSSSQSTFHIPLSPVEVKPGNVRNIIQH	X;X;X;X;X;X;X;X;X;X;X;X;X;X;X;Phospho (STY);X;X;X;X;X;X;X;X;X;X;X;X;X;X;X	XXXXPPPPPPPPPPPPPPPPPPPPPPXXXXX	S(0.001)S(0.003)S(0.003)QS(0.001)T(0.003)FHIPLS(0.99)PVEVKPGNVR	S(-30.27)S(-25.93)S(-25.93)QS(-28.35)T(-25.16)FHIPLS(25.16)PVEVKPGNVR	12	3	0.16325
O15119;O15119-3;O15119-2	432;432;412	O15119	O15119	T-box transcription factor TBX3	TBX3	>sp|O15119|TBX3_HUMAN T-box transcription factor TBX3 OS=Homo sapiens GN=TBX3 PE=1 SV=4;>sp|O15119-3|TBX3_HUMAN Isoform III of T-box transcription factor TBX3 OS=Homo sapiens GN=TBX3;>sp|O15119-2|TBX3_HUMAN Isoform I of T-box transcription factor TBX3 OS=H	1	76.2295	2.80791e-06	269.04	222.69	2	S	FAAERPRDSGRLDKASPDSRHSPATISSSTR	X;X;X;X;X;X;X;X;X;X;X;X;X;X;X;Phospho (STY);X;X;X;X;X;Phospho (STY);X;X;X;X;X;X;X;X;X	XXXXXXXXXXXXXXPPPPPPPPPPPPPPPPP	AS(1)PDSRHS(1)PATISSSTR	AS(76.23)PDS(-76.23)RHS(34.15)PAT(-34.15)IS(-73.25)S(-117.74)S(-156.88)T(-171.09)R	2	3	0.553																0.68225	1.0104	0.87939		0.65169		1.1795	0.89389				0.60781
O15119;O15119-3;O15119-2	438;438;418	O15119	O15119	T-box transcription factor TBX3	TBX3	>sp|O15119|TBX3_HUMAN T-box transcription factor TBX3 OS=Homo sapiens GN=TBX3 PE=1 SV=4;>sp|O15119-3|TBX3_HUMAN Isoform III of T-box transcription factor TBX3 OS=Homo sapiens GN=TBX3;>sp|O15119-2|TBX3_HUMAN Isoform I of T-box transcription factor TBX3 OS=H	0.999973	45.7303	2.80791e-06	269.04	222.69	2	S	RDSGRLDKASPDSRHSPATISSSTRGLGAEE	X;X;X;X;X;X;X;X;X;Phospho (STY);X;X;X;X;X;Phospho (STY);X;X;X;X;X;X;X;X;X;X;X;X;X;X;X	XXXXXXXXPPPPPPPPPPPPPPPPPXXXXXX	AS(1)PDSRHS(1)PATISSSTR	AS(54.5)PDS(-54.5)RHS(45.73)PAT(-45.73)IS(-91.47)S(-129.18)S(-163.58)T(-194.43)R	8	3	-0.19817																0.68225	1.0104	0.87939		0.65169		1.1795	0.89389				0.60781
O15126;O15126-2	43;43	O15126	O15126	Secretory carrier-associated membrane protein 1	SCAMP1	>sp|O15126|SCAM1_HUMAN Secretory carrier-associated membrane protein 1 OS=Homo sapiens GN=SCAMP1 PE=1 SV=2;>sp|O15126-2|SCAM1_HUMAN Isoform 2 of Secretory carrier-associated membrane protein 1 OS=Homo sapiens GN=SCAMP1	0.824729	6.78173	0.00142661	87.323	69.123	1	S	RNVPPGLDEYNPFSDSRTPPPGGVKMPNVPN	X;X;X;X;X;X;X;X;X;X;X;X;X;X;X;Phospho (STY);X;X;X;X;X;X;X;X;X;X;X;X;X;X;X	XPPPPPPPPPPPPPPPPPPPPPPPPXXXXXX	NVPPGLDEYNPFS(0.002)DS(0.825)RT(0.173)PPPGGVK	NVPPGLDEY(-42.58)NPFS(-25.76)DS(6.78)RT(-6.78)PPPGGVK	15	4	-0.042304					0.48957			0.5504			0.44391							0.54186			0.58009
O15143	310	O15143	O15143	Actin-related protein 2/3 complex subunit 1B	ARPC1B	>sp|O15143|ARC1B_HUMAN Actin-related protein 2/3 complex subunit 1B OS=Homo sapiens GN=ARPC1B PE=1 SV=3	0.999976	46.1314	0.000229885	238.19	194.39	1	S	GLTARERFQNLDKKASSEGGTAAGAGLDSLH	X;X;X;X;X;X;X;X;X;X;X;X;X;X;X;Phospho (STY);X;X;X;X;X;X;X;X;X;X;X;X;X;X;X	XXXXXXXXXXXXXPPPPPPPPPPPPPPPPPP	KAS(1)SEGGTAAGAGLDSLHK	KAS(46.13)S(-46.13)EGGT(-125.65)AAGAGLDS(-185.45)LHK	3	3	-0.046142															0.87168	0.90215	0.76817	0.74282	0.65836	0.69062	0.63785	0.93034	1.2296	1.1771		0.78663	0.57192	0.65494
O15143	311	O15143	O15143	Actin-related protein 2/3 complex subunit 1B	ARPC1B	>sp|O15143|ARC1B_HUMAN Actin-related protein 2/3 complex subunit 1B OS=Homo sapiens GN=ARPC1B PE=1 SV=3	0.76782	5.19437	0.000229885	160.67	113.37	1	S	LTARERFQNLDKKASSEGGTAAGAGLDSLHK	X;X;X;X;X;X;X;X;X;X;X;X;X;X;X;Phospho (STY);X;X;X;X;X;X;X;X;X;X;X;X;X;X;X	XXXXXXXXXXXXPPPPPPPPPPPPPPPPPPP	KAS(0.232)S(0.768)EGGTAAGAGLDSLHK	KAS(-5.19)S(5.19)EGGT(-62.27)AAGAGLDS(-125.02)LHK	4	3	-0.054689																						0.93034
O15156;O15156-2	480;514	O15156	O15156	Zinc finger and BTB domain-containing protein 7B	ZBTB7B	>sp|O15156|ZBT7B_HUMAN Zinc finger and BTB domain-containing protein 7B OS=Homo sapiens GN=ZBTB7B PE=1 SV=2;>sp|O15156-2|ZBT7B_HUMAN Isoform 2 of Zinc finger and BTB domain-containing protein 7B OS=Homo sapiens GN=ZBTB7B	0.769788	7.16156	0.00456749	44.11	27.544	1	S	DDAPPHYPPPSTAAASPAGLDLSNGHLDTFR	X;X;X;X;X;X;X;X;X;X;X;X;X;X;X;Phospho (STY);X;X;X;X;X;X;X;X;X;X;X;X;X;X;X	PPPPPPPPPPPPPPPPPPPPPPPPPPPPPPP	DDAPPHYPPPS(0.011)T(0.026)AAAS(0.77)PAGLDLS(0.148)NGHLDT(0.045)FR	DDAPPHY(-32.22)PPPS(-18.44)T(-14.74)AAAS(7.16)PAGLDLS(-7.16)NGHLDT(-12.34)FR	16	4	0.18313
O15164;O15164-2	209;209	O15164	O15164	Transcription intermediary factor 1-alpha	TRIM24	>sp|O15164|TIF1A_HUMAN Transcription intermediary factor 1-alpha OS=Homo sapiens GN=TRIM24 PE=1 SV=3;>sp|O15164-2|TIF1A_HUMAN Isoform Short of Transcription intermediary factor 1-alpha OS=Homo sapiens GN=TRIM24	0.999952	46.1844	6.08623e-05	81.884	67.005	1	S	VKFTKDHTVRQKEEVSPEAVGVTSQRPVFCP	X;X;X;X;X;X;X;X;X;X;X;X;X;X;X;Phospho (STY);X;X;X;X;X;X;X;X;X;X;X;X;X;X;X	XXXXXXXXXXXXPPPPPPPPPPPPPPPPPPP	EEVS(1)PEAVGVTSQRPVFCPFHK	EEVS(46.18)PEAVGVT(-46.18)S(-46.18)QRPVFCPFHK	4	4	0.41516	1.1034	0.91335	0.47784	1.0056	0.77787	0.86943	0.84411	0.86541	1.0528	0.92423	0.81178	0.61868		0.82546	0.83172	1.5708	0.82721	0.49195	1.0423	0.76298	0.60565	0.85579	0.8131	0.69346	0.71367		0.90738	0.35142
O15164;O15164-2	1025;991	O15164	O15164	Transcription intermediary factor 1-alpha	TRIM24	>sp|O15164|TIF1A_HUMAN Transcription intermediary factor 1-alpha OS=Homo sapiens GN=TRIM24 PE=1 SV=3;>sp|O15164-2|TIF1A_HUMAN Isoform Short of Transcription intermediary factor 1-alpha OS=Homo sapiens GN=TRIM24	0.999803	37.0446	0.000362299	84.653	67.729	2	S	FPKPEFRNESEDNKFSDDSDDDFVQPRKKRL	X;X;X;X;X;X;X;X;X;X;X;X;X;X;X;Phospho (STY);X;X;Phospho (STY);X;X;X;X;X;X;X;X;X;X;X;X	XXXXXXXPPPPPPPPPPPPPPPPPPPPXXXX	NESEDNKFS(1)DDS(1)DDDFVQPR	NES(-37.04)EDNKFS(37.04)DDS(48.32)DDDFVQPR	9	3	0.033692
O15164;O15164-2	1028;994	O15164	O15164	Transcription intermediary factor 1-alpha	TRIM24	>sp|O15164|TIF1A_HUMAN Transcription intermediary factor 1-alpha OS=Homo sapiens GN=TRIM24 PE=1 SV=3;>sp|O15164-2|TIF1A_HUMAN Isoform Short of Transcription intermediary factor 1-alpha OS=Homo sapiens GN=TRIM24	0.999999	58.2414	0.000362299	84.653	67.729	2	S	PEFRNESEDNKFSDDSDDDFVQPRKKRLKSI	X;X;X;X;X;X;X;X;X;X;X;X;Phospho (STY);X;X;Phospho (STY);X;X;X;X;X;X;X;X;X;X;X;X;X;X;X	XXXXPPPPPPPPPPPPPPPPPPPPXXXXXXX	NESEDNKFS(1)DDS(1)DDDFVQPR	NES(-35.75)EDNKFS(35.75)DDS(58.24)DDDFVQPR	12	3	-0.065922
O15164;O15164-2	808;774	O15164	O15164	Transcription intermediary factor 1-alpha	TRIM24	>sp|O15164|TIF1A_HUMAN Transcription intermediary factor 1-alpha OS=Homo sapiens GN=TRIM24 PE=1 SV=3;>sp|O15164-2|TIF1A_HUMAN Isoform Short of Transcription intermediary factor 1-alpha OS=Homo sapiens GN=TRIM24	0.698703	3.65303	0.000148297	174.4	127.83	1	S	HQDNSSNGKSEWLDPSQKSPLHVGETRKEDD	X;X;X;X;X;X;X;X;X;X;X;X;X;X;X;Phospho (STY);X;X;X;X;X;X;X;X;X;X;X;X;X;X;X	XXXXXXXXXPPPPPPPPPPPPPPPPPPXXXX	SEWLDPS(0.699)QKS(0.301)PLHVGETR	S(-52.94)EWLDPS(3.65)QKS(-3.65)PLHVGET(-64.54)R	7	3	-0.013925							0.4597
O15164;O15164-2	811;777	O15164	O15164	Transcription intermediary factor 1-alpha	TRIM24	>sp|O15164|TIF1A_HUMAN Transcription intermediary factor 1-alpha OS=Homo sapiens GN=TRIM24 PE=1 SV=3;>sp|O15164-2|TIF1A_HUMAN Isoform Short of Transcription intermediary factor 1-alpha OS=Homo sapiens GN=TRIM24	1	74.6548	9.8981e-05	265.08	227.23	1	S	NSSNGKSEWLDPSQKSPLHVGETRKEDDPNE	X;X;X;X;X;X;X;X;X;X;X;X;X;X;X;Phospho (STY);X;X;X;X;X;X;X;X;X;X;X;X;X;X;X	XXXXXXPPPPPPPPPPPPPPPPPPXXXXXXX	SEWLDPSQKS(1)PLHVGETR	S(-98.46)EWLDPS(-74.65)QKS(74.65)PLHVGET(-134.57)R	10	3	0.27743					0.71857	0.7798		0.54485	0.65829	0.86165	0.80955	0.58812	0.79143	0.75556		0.7565	0.70962	0.81349	0.89743	0.69134	0.69972	0.65999	0.78764	0.75337	1.065		0.80888
O15164;O15164-2	660;626	O15164	O15164	Transcription intermediary factor 1-alpha	TRIM24	>sp|O15164|TIF1A_HUMAN Transcription intermediary factor 1-alpha OS=Homo sapiens GN=TRIM24 PE=1 SV=3;>sp|O15164-2|TIF1A_HUMAN Isoform Short of Transcription intermediary factor 1-alpha OS=Homo sapiens GN=TRIM24	0.657922	6.14983	9.04823e-05	68.657	42.196	1	S	IDHGQPRPPSNRTVQSPNSSVPSPGLAGPVT	X;X;X;X;X;X;X;X;X;X;X;X;X;X;X;Phospho (STY);X;X;X;X;X;X;X;X;X;X;X;X;X;X;X	XXXXXXXXXXXXPPPPPPPPPPPPPPPPPPP	T(0.017)VQS(0.658)PNS(0.16)S(0.16)VPS(0.006)PGLAGPVTMTSVHPPIR	T(-15.91)VQS(6.15)PNS(-6.15)S(-6.15)VPS(-20.63)PGLAGPVT(-37.8)MT(-41.26)S(-44.25)VHPPIR	4	3	-0.74588
O15164;O15164-2	663;629	O15164	O15164	Transcription intermediary factor 1-alpha	TRIM24	>sp|O15164|TIF1A_HUMAN Transcription intermediary factor 1-alpha OS=Homo sapiens GN=TRIM24 PE=1 SV=3;>sp|O15164-2|TIF1A_HUMAN Isoform Short of Transcription intermediary factor 1-alpha OS=Homo sapiens GN=TRIM24	0.724503	5.64595	6.8219e-08	107.03	71.875	1	S	GQPRPPSNRTVQSPNSSVPSPGLAGPVTMTS	X;X;X;X;X;X;X;X;X;X;X;X;X;X;X;Phospho (STY);X;X;X;X;X;X;X;X;X;X;X;X;X;X;X	XXXXXXXXXPPPPPPPPPPPPPPPPPPPPPP	T(0.001)VQS(0.077)PNS(0.725)S(0.197)VPSPGLAGPVTMTSVHPPIR	T(-28.78)VQS(-9.75)PNS(5.65)S(-5.65)VPS(-33.35)PGLAGPVT(-60.45)MT(-60.78)S(-63.16)VHPPIR	7	3	0.13122
O15169;O15169-2	75;75	O15169	O15169	Axin-1	AXIN1	>sp|O15169|AXIN1_HUMAN Axin-1 OS=Homo sapiens GN=AXIN1 PE=1 SV=2;>sp|O15169-2|AXIN1_HUMAN Isoform 2 of Axin-1 OS=Homo sapiens GN=AXIN1	0.509625	1.80215	0.00205037	52.451	33.234	1	S	TPRRSDLDLGYEPEGSASPTPPYLKWAESLH	X;X;X;X;X;X;X;X;X;X;X;X;X;X;X;Phospho (STY);X;X;X;X;X;X;X;X;X;X;X;X;X;X;X	XXXPPPPPPPPPPPPPPPPPPPPPPXXXXXX	RSDLDLGYEPEGS(0.51)AS(0.111)PT(0.337)PPY(0.042)LK	RS(-32.81)DLDLGY(-34.1)EPEGS(1.8)AS(-6.62)PT(-1.8)PPY(-10.81)LK	13	3	-0.11465
O15169;O15169-2	77;77	O15169	O15169	Axin-1	AXIN1	>sp|O15169|AXIN1_HUMAN Axin-1 OS=Homo sapiens GN=AXIN1 PE=1 SV=2;>sp|O15169-2|AXIN1_HUMAN Isoform 2 of Axin-1 OS=Homo sapiens GN=AXIN1	0.896672	11.444	0.000211325	69.779	36.232	1	S	RRSDLDLGYEPEGSASPTPPYLKWAESLHSL	X;X;X;X;X;X;X;X;X;X;X;X;X;X;X;Phospho (STY);X;X;X;X;X;X;X;X;X;X;X;X;X;X;X	XPPPPPPPPPPPPPPPPPPPPPPXXXXXXXX	RSDLDLGYEPEGS(0.038)AS(0.897)PT(0.064)PPY(0.001)LK	RS(-55.82)DLDLGY(-55.25)EPEGS(-13.68)AS(11.44)PT(-11.44)PPY(-31.75)LK	15	3	-0.24016
O15173;O15173-2	90;114	O15173	O15173	Membrane-associated progesterone receptor component 2	PGRMC2	>sp|O15173|PGRC2_HUMAN Membrane-associated progesterone receptor component 2 OS=Homo sapiens GN=PGRMC2 PE=1 SV=1;>sp|O15173-2|PGRC2_HUMAN Isoform 2 of Membrane-associated progesterone receptor component 2 OS=Homo sapiens GN=PGRMC2	0.996426	25.7264	4.97661e-35	163.78	106.17	1	S	WGRRGLGAGAGAGEESPATSLPRMKKRDFSL	X;X;X;X;X;X;X;X;X;X;X;X;X;X;X;Phospho (STY);X;X;X;X;X;X;X;X;X;X;X;X;X;X;X	XXXPPPPPPPPPPPPPPPPPPPPXXXXXXXX	GLGAGAGAGEES(0.996)PAT(0.003)S(0.001)LPR	GLGAGAGAGEES(25.73)PAT(-25.73)S(-30.4)LPR	12	2	-1.6016																	2.1872	1.4254		1.6022
O15173;O15173-2	208;232	O15173	O15173	Membrane-associated progesterone receptor component 2	PGRMC2	>sp|O15173|PGRC2_HUMAN Membrane-associated progesterone receptor component 2 OS=Homo sapiens GN=PGRMC2 PE=1 SV=1;>sp|O15173-2|PGRC2_HUMAN Isoform 2 of Membrane-associated progesterone receptor component 2 OS=Homo sapiens GN=PGRMC2	0.999511	30.7009	4.79708e-06	120.32	100.65	1;2	S	KYDYVGRLLKPGEEPSEYTDEEDTKDHNKQD	X;X;X;X;X;X;X;X;X;X;X;X;X;X;X;Phospho (STY);X;Phospho (STY);Phospho (STY);X;X;X;X;Phospho (STY);X;X;X;X;X;X;X	XPPPPPPPPPPPPPPPPPPPPPPPPXXXXXX	LLKPGEEPS(1)EY(0.56)T(0.439)DEEDT(0.001)K	LLKPGEEPS(30.7)EY(1.06)T(-1.06)DEEDT(-28.32)K	9	3	-0.63559				2.318
O15213	41	O15213	O15213	WD repeat-containing protein 46	WDR46	>sp|O15213|WDR46_HUMAN WD repeat-containing protein 46 OS=Homo sapiens GN=WDR46 PE=1 SV=3	0.99906	33.2763	5.88081e-05	91.065	78.013	1	S	RRYWEEETVPTTAGASPGPPRNKKNRELRPQ	X;X;X;X;X;X;X;X;X;X;X;X;X;X;X;Phospho (STY);X;X;X;X;X;X;X;X;X;X;X;X;X;X;X	XPPPPPPPPPPPPPPPPPPPPXXXXXXXXXX	RYWEEETVPTTAGAS(0.999)PGPPR	RY(-82.53)WEEET(-71.75)VPT(-33.28)T(-33.28)AGAS(33.28)PGPPR	15	3	0.4708				1.889		0.83745	1.573								0.96651		0.81491		0.72299	0.64789			0.75479			0.43339
O15231;O15231-2;O15231-9;O15231-5;O15231-4;O15231-7;O15231-3;O15231-8;O15231-6	446;209;84;225;387;417;447;449;478	O15231	O15231	Zinc finger protein 185	ZNF185	>sp|O15231|ZN185_HUMAN Zinc finger protein 185 OS=Homo sapiens GN=ZNF185 PE=1 SV=3;>sp|O15231-2|ZN185_HUMAN Isoform 2 of Zinc finger protein 185 OS=Homo sapiens GN=ZNF185;>sp|O15231-9|ZN185_HUMAN Isoform 9 of Zinc finger protein 185 OS=Homo sapiens GN=ZNF1	0.763265	5.22036	3.006e-07	73.936	48.96	2	S	GQGDPAVPAQQPADPSTPERQSSPSGSEQLV	X;X;X;X;X;X;X;X;X;X;X;X;X;X;X;Phospho (STY);Phospho (STY);X;X;X;X;Phospho (STY);Phospho (STY);X;X;X;Phospho (STY);X;X;X;X	PPPPPPPPPPPPPPPPPPPPPPPPPPPPPPP	GGQGDPAVPAQQPADPS(0.763)T(0.241)PERQS(0.39)S(0.39)PS(0.153)GS(0.061)EQLVR	GGQGDPAVPAQQPADPS(5.22)T(-5.22)PERQS(0)S(0)PS(-4.14)GS(-8.19)EQLVR	17	3	-0.094055							1.1764												0.80025		0.70047
O15231;O15231-2;O15231-9;O15231-5;O15231-4;O15231-7;O15231-3;O15231-8;O15231-6	452;215;90;231;393;423;453;455;484	O15231	O15231	Zinc finger protein 185	ZNF185	>sp|O15231|ZN185_HUMAN Zinc finger protein 185 OS=Homo sapiens GN=ZNF185 PE=1 SV=3;>sp|O15231-2|ZN185_HUMAN Isoform 2 of Zinc finger protein 185 OS=Homo sapiens GN=ZNF185;>sp|O15231-9|ZN185_HUMAN Isoform 9 of Zinc finger protein 185 OS=Homo sapiens GN=ZNF1	0.725113	5.62932	6.20331e-22	108.22	87.165	2	S	VPAQQPADPSTPERQSSPSGSEQLVRRESCG	X;X;X;X;X;X;X;X;X;Phospho (STY);Phospho (STY);X;X;X;X;Phospho (STY);Phospho (STY);X;X;X;X;X;X;X;X;X;X;X;Phospho (STY);X;X	PPPPPPPPPPPPPPPPPPPPPPPPPPXXXXX	GGQGDPAVPAQQPADPS(0.066)T(0.025)PERQS(0.725)S(0.463)PS(0.24)GS(0.481)EQLVR	GGQGDPAVPAQQPADPS(-9.42)T(-13.98)PERQS(5.63)S(0)PS(-4.4)GS(0)EQLVR	23	3	1.1936
O15231;O15231-2;O15231-9;O15231-5;O15231-4;O15231-7;O15231-3;O15231-8;O15231-6	453;216;91;232;394;424;454;456;485	O15231	O15231	Zinc finger protein 185	ZNF185	>sp|O15231|ZN185_HUMAN Zinc finger protein 185 OS=Homo sapiens GN=ZNF185 PE=1 SV=3;>sp|O15231-2|ZN185_HUMAN Isoform 2 of Zinc finger protein 185 OS=Homo sapiens GN=ZNF185;>sp|O15231-9|ZN185_HUMAN Isoform 9 of Zinc finger protein 185 OS=Homo sapiens GN=ZNF1	0.493934	3.87222	6.20331e-22	108.22	87.165		S	PAQQPADPSTPERQSSPSGSEQLVRRESCGS	X;X;X;X;X;X;X;X;Phospho (STY);X;X;X;X;X;Phospho (STY);Phospho (STY);X;X;X;X;X;X;X;X;X;X;X;Phospho (STY);X;X;Phospho (STY)	PPPPPPPPPPPPPPPPPPPPPPPPPXXXXXX	GGQGDPAVPAQQPADPS(0.471)T(0.471)PERQS(0.182)S(0.494)PS(0.175)GS(0.208)EQLVR	GGQGDPAVPAQQPADPS(0)T(0)PERQS(-5.42)S(3.87)PS(-4.65)GS(-3.87)EQLVR	24	3	1.6491
O15231;O15231-2;O15231-9;O15231-5;O15231-4;O15231-7;O15231-3;O15231-8;O15231-6	455;218;93;234;396;426;456;458;487	O15231	O15231	Zinc finger protein 185	ZNF185	>sp|O15231|ZN185_HUMAN Zinc finger protein 185 OS=Homo sapiens GN=ZNF185 PE=1 SV=3;>sp|O15231-2|ZN185_HUMAN Isoform 2 of Zinc finger protein 185 OS=Homo sapiens GN=ZNF185;>sp|O15231-9|ZN185_HUMAN Isoform 9 of Zinc finger protein 185 OS=Homo sapiens GN=ZNF1	0.395552	0	2.92114e-05	67.911	45.256		S	QQPADPSTPERQSSPSGSEQLVRRESCGSSV	X;X;X;X;X;X;X;Phospho (STY);X;X;X;X;X;X;X;Phospho (STY);X;X;X;X;X;X;X;X;X;Phospho (STY);X;X;Phospho (STY);X;X	PPPPPPPPPPPPPPPPPPPPPPPXXXXXXXX	GGQGDPAVPAQQPADPS(0.363)T(0.464)PERQS(0.146)S(0.146)PS(0.396)GS(0.485)EQLVR	GGQGDPAVPAQQPADPS(-1.08)T(1.08)PERQS(-5.05)S(-5.05)PS(0)GS(0)EQLVR	26	3	1.7017
O15231;O15231-2;O15231-9;O15231-5;O15231-4;O15231-7;O15231-3;O15231-8;O15231-6	457;220;95;236;398;428;458;460;489	O15231	O15231	Zinc finger protein 185	ZNF185	>sp|O15231|ZN185_HUMAN Zinc finger protein 185 OS=Homo sapiens GN=ZNF185 PE=1 SV=3;>sp|O15231-2|ZN185_HUMAN Isoform 2 of Zinc finger protein 185 OS=Homo sapiens GN=ZNF185;>sp|O15231-9|ZN185_HUMAN Isoform 9 of Zinc finger protein 185 OS=Homo sapiens GN=ZNF1	0.494861	4.67444	2.92114e-05	67.911	45.256		S	PADPSTPERQSSPSGSEQLVRRESCGSSVLT	X;X;X;X;Phospho (STY);Phospho (STY);X;X;X;X;X;X;X;X;X;Phospho (STY);X;X;X;X;X;X;X;Phospho (STY);X;X;Phospho (STY);X;X;X;Phospho (STY)	PPPPPPPPPPPPPPPPPPPPPXXXXXXXXXX	GGQGDPAVPAQQPADPS(0.727)T(0.256)PERQS(0.174)S(0.174)PS(0.175)GS(0.495)EQLVR	GGQGDPAVPAQQPADPS(4.67)T(-4.67)PERQS(-4.67)S(-4.67)PS(-4.67)GS(4.67)EQLVR	28	3	-0.076861
O15231;O15231-2;O15231-9;O15231-5;O15231-4;O15231-7;O15231-3;O15231-8;O15231-6	512;275;150;291;453;483;513;515;544	O15231	O15231	Zinc finger protein 185	ZNF185	>sp|O15231|ZN185_HUMAN Zinc finger protein 185 OS=Homo sapiens GN=ZNF185 PE=1 SV=3;>sp|O15231-2|ZN185_HUMAN Isoform 2 of Zinc finger protein 185 OS=Homo sapiens GN=ZNF185;>sp|O15231-9|ZN185_HUMAN Isoform 9 of Zinc finger protein 185 OS=Homo sapiens GN=ZNF1	0.458496	0	0.000781112	49.707	22.617		S	GQGDPAVPTQQPADPSTPEQQNSPSGSEQFV	X;X;X;X;X;X;X;X;X;X;X;X;X;X;X;Phospho (STY);X;X;X;X;X;X;X;X;Phospho (STY);X;X;X;X;X;X	PPPPPPPPPPPPPPPPPPPPPPPPPPPPPPP	GGQGDPAVPT(0.005)QQPADPS(0.458)T(0.458)PEQQNS(0.401)PS(0.5)GS(0.177)EQFVR	GGQGDPAVPT(-19.52)QQPADPS(0)T(0)PEQQNS(-1.04)PS(1.04)GS(-4.99)EQFVR	17	3	-0.36835
O15231;O15231-2;O15231-9;O15231-5;O15231-4;O15231-7;O15231-3;O15231-8;O15231-6	521;284;159;300;462;492;522;524;553	O15231	O15231	Zinc finger protein 185	ZNF185	>sp|O15231|ZN185_HUMAN Zinc finger protein 185 OS=Homo sapiens GN=ZNF185 PE=1 SV=3;>sp|O15231-2|ZN185_HUMAN Isoform 2 of Zinc finger protein 185 OS=Homo sapiens GN=ZNF185;>sp|O15231-9|ZN185_HUMAN Isoform 9 of Zinc finger protein 185 OS=Homo sapiens GN=ZNF1	0.500289	1.03525	0.000781112	49.707	22.617	2	S	QQPADPSTPEQQNSPSGSEQFVRRESCTSRV	X;X;X;X;X;X;Phospho (STY);X;X;X;X;X;X;X;X;Phospho (STY);X;X;X;X;X;X;X;X;X;X;X;X;X;X;X	PPPPPPPPPPPPPPPPPPPPPPPXXXXXXXX	GGQGDPAVPT(0.005)QQPADPS(0.458)T(0.458)PEQQNS(0.401)PS(0.5)GS(0.177)EQFVR	GGQGDPAVPT(-19.52)QQPADPS(0)T(0)PEQQNS(-1.04)PS(1.04)GS(-4.99)EQFVR	26	3	-0.36835
O15231;O15231-2;O15231-9;O15231-5;O15231-4;O15231-7;O15231-3;O15231-8;O15231-6	465;228;103;244;406;436;466;468;497	O15231	O15231	Zinc finger protein 185	ZNF185	>sp|O15231|ZN185_HUMAN Zinc finger protein 185 OS=Homo sapiens GN=ZNF185 PE=1 SV=3;>sp|O15231-2|ZN185_HUMAN Isoform 2 of Zinc finger protein 185 OS=Homo sapiens GN=ZNF185;>sp|O15231-9|ZN185_HUMAN Isoform 9 of Zinc finger protein 185 OS=Homo sapiens GN=ZNF1	0.999931	41.641	0.0010204	178.55	134.5	1	S	RQSSPSGSEQLVRRESCGSSVLTDFEGKDVA	X;X;Phospho (STY);Phospho (STY);X;Phospho (STY);X;Phospho (STY);X;X;X;X;X;X;X;Phospho (STY);X;X;X;X;X;X;X;X;X;X;X;X;X;X;X	XXXXXXXXXXXXXPPPPPPPPPPPPPPPXXX	RES(1)CGSSVLTDFEGK	RES(41.64)CGS(-41.64)S(-63.27)VLT(-69.36)DFEGK	3	3	-0.43607								0.72177			1.0496		0.68223			1.171						1.1379	0.75961	1.0124	0.64555			0.58031
O15231;O15231-2;O15231-9;O15231-5;O15231-4;O15231-7;O15231-3;O15231-8;O15231-6	468;231;106;247;409;439;469;471;500	O15231	O15231	Zinc finger protein 185	ZNF185	>sp|O15231|ZN185_HUMAN Zinc finger protein 185 OS=Homo sapiens GN=ZNF185 PE=1 SV=3;>sp|O15231-2|ZN185_HUMAN Isoform 2 of Zinc finger protein 185 OS=Homo sapiens GN=ZNF185;>sp|O15231-9|ZN185_HUMAN Isoform 9 of Zinc finger protein 185 OS=Homo sapiens GN=ZNF1	0.866022	8.76543	0.0367559	98.676	54.165	1	S	SPSGSEQLVRRESCGSSVLTDFEGKDVATKV	Phospho (STY);X;Phospho (STY);X;Phospho (STY);X;X;X;X;X;X;X;X;X;X;Phospho (STY);X;X;X;X;X;X;X;X;X;X;X;X;X;X;X	XXXXXXXXXXPPPPPPPPPPPPPPPXXXXXX	RES(0.115)CGS(0.866)S(0.003)VLT(0.016)DFEGK	RES(-8.77)CGS(8.77)S(-25.38)VLT(-17.23)DFEGK	6	3	0.012541
O15234	363	O15234	O15234	Protein CASC3	CASC3	>sp|O15234|CASC3_HUMAN Protein CASC3 OS=Homo sapiens GN=CASC3 PE=1 SV=2	0.999674	37.7364	0.000145801	72.316	49.38	2	S	SYRSRRLEQTSVRDPSPEADAPVLGSPEKEE	X;X;X;X;X;X;X;X;X;X;X;X;X;X;X;Phospho (STY);X;X;X;X;X;X;X;X;X;Phospho (STY);X;X;X;X;X	XXXXXPPPPPPPPPPPPPPPPPPPPPPPPXX	RLEQTSVRDPS(1)PEADAPVLGS(1)PEK	RLEQT(-38.05)S(-37.74)VRDPS(37.74)PEADAPVLGS(62.9)PEK	11	3	-0.26163							0.84165																1.0134	0.66887			1.4387
O15234	373	O15234	O15234	Protein CASC3	CASC3	>sp|O15234|CASC3_HUMAN Protein CASC3 OS=Homo sapiens GN=CASC3 PE=1 SV=2	1	67.7531	0.000145801	72.316	49.38	2	S	SVRDPSPEADAPVLGSPEKEEAASEPPAAAP	X;X;X;X;X;Phospho (STY);X;X;X;X;X;X;X;X;X;Phospho (STY);X;X;X;X;X;X;X;X;X;X;X;X;X;X;X	PPPPPPPPPPPPPPPPPPPXXXXXXXXXXXX	RLEQT(0.007)S(0.003)VRDPS(0.99)PEADAPVLGS(1)PEK	RLEQT(-21.33)S(-25.12)VRDPS(21.33)PEADAPVLGS(67.75)PEK	21	3	0.40846							0.84165																1.0134	0.66887			1.4387
O15234	148	O15234	O15234	Protein CASC3	CASC3	>sp|O15234|CASC3_HUMAN Protein CASC3 OS=Homo sapiens GN=CASC3 PE=1 SV=2	1	64.452	7.43928e-45	179.84	160.74	1	S	EEKPDTKSTVTGERQSGDGQESTEPVENKVG	X;X;X;X;X;X;X;X;X;X;X;X;X;X;X;Phospho (STY);X;X;X;X;X;X;X;X;X;X;X;X;X;X;X	XXXXXXXPPPPPPPPPPPPPPPPPPPPPPXX	STVTGERQS(1)GDGQESTEPVENK	S(-92.31)T(-86.29)VT(-64.45)GERQS(64.45)GDGQES(-86.72)T(-87.16)EPVENK	9	3	-0.028727	0.87076	0.75658	0.45934	0.84421	0.71645	0.8351	0.73245	0.90611	0.73098	0.83489	0.71586	0.56456	0.69796	0.69578	0.8306	0.73535	0.69669	0.65824	0.67956	0.64074	0.64726	0.69585	0.69155	0.69328	0.72573	0.5661	0.71454	0.60567
O15234	265	O15234	O15234	Protein CASC3	CASC3	>sp|O15234|CASC3_HUMAN Protein CASC3 OS=Homo sapiens GN=CASC3 PE=1 SV=2	0.999882	39.2685	0.00103217	203.2	151.56	1	S	PDDIKPRRIRKPRYGSPPQRDPNWNGERLNK	X;X;X;X;X;X;X;X;X;X;X;X;X;X;X;Phospho (STY);X;X;X;X;X;X;X;X;X;X;X;X;X;X;X	XXXXXXXXXXXXXPPPPPPPPPPPPPPPXXX	YGS(1)PPQRDPNWNGER	Y(-39.27)GS(39.27)PPQRDPNWNGER	3	3	-0.17907																1.375	1.2618	1.2736	1.0505	1.2532	1.0093	1.231	1.0848	1.1652			1.1976
O15258	6	O15258	O15258	Protein RER1	RER1	>sp|O15258|RER1_HUMAN Protein RER1 OS=Homo sapiens GN=RER1 PE=1 SV=1	1	100.504	7.76198e-06	296.27	263.71	1	S	__________MSEGDSVGESVHGKPSVVYRF	X;X;X;X;X;X;X;X;X;X;X;X;X;X;X;Phospho (STY);X;X;X;X;X;X;X;X;X;X;X;X;X;X;X	XXXXXXXXXXXPPPPPPPPPPPPPPPPPPPX	SEGDS(1)VGESVHGKPSVVYR	S(-100.52)EGDS(100.5)VGES(-100.5)VHGKPS(-190.39)VVY(-200.43)R	5	3	0.43908	1.2903	0.99561	0.65824												1.0005				1.0215			1.2103	1.0038	1.2029	1.1583	0.31893	0.81806
O15258	95	O15258	O15258	Protein RER1	RER1	>sp|O15258|RER1_HUMAN Protein RER1 OS=Homo sapiens GN=RER1 PE=1 SV=1	0.999998	58.0778	1.92597e-70	204.17	153.13	1	S	IAFLSPKVDPSLMEDSDDGPSLPTKQNEEFR	X;X;X;X;X;X;X;X;X;X;X;X;X;X;X;Phospho (STY);X;X;X;X;X;X;X;X;X;X;X;X;X;X;X	XXXXXXXPPPPPPPPPPPPPPPPPPXXXXXX	VDPSLMEDS(1)DDGPSLPTK	VDPS(-74.24)LMEDS(58.08)DDGPS(-58.08)LPT(-94.31)K	9	2	-0.39156	0.88669			1.253	0.6419	0.76367		0.6578		0.85342		0.78192	0.73569	0.71957	0.70826	0.53492	0.52313	0.53537	0.38134	0.66273	0.78032		0.58192	0.80192	0.80834		0.6004	0.10319
O15258	100	O15258	O15258	Protein RER1	RER1	>sp|O15258|RER1_HUMAN Protein RER1 OS=Homo sapiens GN=RER1 PE=1 SV=1	0.989591	20.241	0.000379215	104.9	82.123	1	S	PKVDPSLMEDSDDGPSLPTKQNEEFRPFIRR	X;X;X;X;X;X;X;X;X;X;X;X;X;X;X;Phospho (STY);X;X;X;X;X;X;X;X;X;X;X;X;X;X;X	XXPPPPPPPPPPPPPPPPPPXXXXXXXXXXX	VDPSLMEDS(0.001)DDGPS(0.99)LPT(0.009)K	VDPS(-77)LMEDS(-29.76)DDGPS(20.24)LPT(-20.24)K	14	3	-0.17213							1.2719		0.86031		0.77282						0.75752
O15265;O15265-3;O15265-2	783;638;783	O15265	O15265	Ataxin-7	ATXN7	>sp|O15265|ATX7_HUMAN Ataxin-7 OS=Homo sapiens GN=ATXN7 PE=1 SV=1;>sp|O15265-3|ATX7_HUMAN Isoform 3 of Ataxin-7 OS=Homo sapiens GN=ATXN7;>sp|O15265-2|ATX7_HUMAN Isoform b of Ataxin-7 OS=Homo sapiens GN=ATXN7	0.920437	10.6334	0.000720812	134.3	99.227	1	S	VNVRHDQSGRGPPTGSPAESIKRMSVMVNSS	X;X;X;X;X;X;X;X;X;X;X;X;X;X;X;Phospho (STY);X;X;X;X;X;X;X;X;X;X;X;X;X;X;X	XXXXPPPPPPPPPPPPPPPPPPXXXXXXXXX	HDQSGRGPPT(0.08)GS(0.92)PAESIK	HDQS(-70.62)GRGPPT(-10.63)GS(10.63)PAES(-49.7)IK	12	3	-0.11727
O15320;Q96PC5;O15320-9;O15320-8;O15320-6;O15320-4;O15320-3;O15320-10;O15320-5	517;1125;479;437;442;517;488;505;522	O15320	O15320	cTAGE family member 5;Melanoma inhibitory activity protein 2	CTAGE5;MIA2	>sp|O15320|CTGE5_HUMAN cTAGE family member 5 OS=Homo sapiens GN=CTAGE5 PE=1 SV=4;>sp|Q96PC5|MIA2_HUMAN Melanoma inhibitory activity protein 2 OS=Homo sapiens GN=MIA2 PE=1 SV=4;>sp|O15320-9|CTGE5_HUMAN Isoform 10 of cTAGE family member 5 OS=Homo sapiens GN=	0.890095	8.55006	2.98502e-07	78.128	60.07	1;2	S	PYALDVPNTAFGREHSPYGPSPLGWPSSETR	X;X;X;X;X;X;X;X;X;X;X;X;X;X;X;Phospho (STY);X;X;X;X;Phospho (STY);X;X;X;X;X;X;X;X;X;X	PPPPPPPPPPPPPPPPPPPPPPPPPPPPPPP	DPYALDVPNT(0.004)AFGREHS(0.89)PY(0.242)GPS(0.856)PLGWPS(0.004)S(0.004)ETR	DPY(-66.02)ALDVPNT(-23.96)AFGREHS(8.55)PY(-7.41)GPS(7.41)PLGWPS(-23.96)S(-23.96)ET(-33.96)R	17	4	-0.96484
O15320;Q96PC5;O15320-9;O15320-8;O15320-6;O15320-4;O15320-3;O15320-10;O15320-5	522;1130;484;442;447;522;493;510;527	O15320	O15320	cTAGE family member 5;Melanoma inhibitory activity protein 2	CTAGE5;MIA2	>sp|O15320|CTGE5_HUMAN cTAGE family member 5 OS=Homo sapiens GN=CTAGE5 PE=1 SV=4;>sp|Q96PC5|MIA2_HUMAN Melanoma inhibitory activity protein 2 OS=Homo sapiens GN=MIA2 PE=1 SV=4;>sp|O15320-9|CTGE5_HUMAN Isoform 10 of cTAGE family member 5 OS=Homo sapiens GN=	0.905559	10.3127	2.98502e-07	78.128	60.07	2	S	VPNTAFGREHSPYGPSPLGWPSSETRAFLSP	X;X;X;X;X;X;X;X;X;X;Phospho (STY);X;X;X;X;Phospho (STY);X;X;X;X;X;X;X;X;X;X;X;X;X;X;X	PPPPPPPPPPPPPPPPPPPPPPPPPPXXXXX	DPYALDVPNT(0.06)AFGREHS(0.75)PY(0.262)GPS(0.906)PLGWPS(0.009)S(0.009)ET(0.004)R	DPY(-44.58)ALDVPNT(-11.55)AFGREHS(5.47)PY(-5.47)GPS(10.31)PLGWPS(-20.59)S(-20.59)ET(-24.83)R	22	4	0.53777
O15320;Q96PC5;O15320-9;O15320-8;O15320-6;O15320-4;O15320-3;O15320-10;O15320-5;O15320-7;O15320-2;Q8IX94;P0CG41;Q86UF2;A4D2H0	137;745;99;57;62;137;108;125;142;108;137;138;138;138;138	O15320;Q8IX94	O15320	cTAGE family member 5;Melanoma inhibitory activity protein 2;cTAGE family member 4;cTAGE family member 8;cTAGE family member 6;cTAGE family member 15	CTAGE5;MIA2;CTAGE4;CTAGE8;CTAGE6;CTAGE15	>sp|O15320|CTGE5_HUMAN cTAGE family member 5 OS=Homo sapiens GN=CTAGE5 PE=1 SV=4;>sp|Q96PC5|MIA2_HUMAN Melanoma inhibitory activity protein 2 OS=Homo sapiens GN=MIA2 PE=1 SV=4;>sp|O15320-9|CTGE5_HUMAN Isoform 10 of cTAGE family member 5 OS=Homo sapiens GN=	1	75.4812	4.838e-06	319.28	272.06	1	S	EEARSLEATCEKLNRSNSELEDEILCLEKDL;TEAQSLEATCEKLNRSNSELEDEILCLEKEL	X;X;X;X;X;X;X;X;X;X;X;X;X;X;X;Phospho (STY);X;X;X;X;X;X;X;X;X;X;X;X;X;X;X	XXXXXXXXXXXXPPPPPPPPPPPPPPPPPXX	LNRS(1)NSELEDEILCLEK	LNRS(75.48)NS(-75.48)ELEDEILCLEK	4	3	-0.053409			0.47967	3.4078	0.96409	1.1551			0.85618	1.3973		0.7226				0.55169	1.0329
O15320;Q96PC5;O15320-9;O15320-8;O15320-6;O15320-4;O15320-3;O15320-10;O15320-5;O15320-7;O15320-2	594;1202;556;514;519;594;565;582;599;522;551	O15320	O15320	cTAGE family member 5;Melanoma inhibitory activity protein 2	CTAGE5;MIA2	>sp|O15320|CTGE5_HUMAN cTAGE family member 5 OS=Homo sapiens GN=CTAGE5 PE=1 SV=4;>sp|Q96PC5|MIA2_HUMAN Melanoma inhibitory activity protein 2 OS=Homo sapiens GN=MIA2 PE=1 SV=4;>sp|O15320-9|CTGE5_HUMAN Isoform 10 of cTAGE family member 5 OS=Homo sapiens GN=	0.784042	6.63482	0.000829993	99.834	43.265	1	S	CDRLTDPHRAPSDTGSLSPPWDQDRRMMFPP	X;X;X;X;X;X;X;X;X;X;X;X;X;X;X;Phospho (STY);X;X;X;X;X;X;X;X;X;X;X;X;X;X;X	XXXPPPPPPPPPPPPPPPPPPPPPPPXXXXX	LTDPHRAPS(0.006)DT(0.04)GS(0.784)LS(0.17)PPWDQDRR	LT(-38.86)DPHRAPS(-21.32)DT(-12.93)GS(6.63)LS(-6.63)PPWDQDRR	13	4	-1.4231
O15320;Q96PC5;O15320-9;O15320-8;O15320-6;O15320-4;O15320-3;O15320-10;O15320-5;O15320-7;O15320-2	596;1204;558;516;521;596;567;584;601;524;553	O15320	O15320	cTAGE family member 5;Melanoma inhibitory activity protein 2	CTAGE5;MIA2	>sp|O15320|CTGE5_HUMAN cTAGE family member 5 OS=Homo sapiens GN=CTAGE5 PE=1 SV=4;>sp|Q96PC5|MIA2_HUMAN Melanoma inhibitory activity protein 2 OS=Homo sapiens GN=MIA2 PE=1 SV=4;>sp|O15320-9|CTGE5_HUMAN Isoform 10 of cTAGE family member 5 OS=Homo sapiens GN=	0.970865	15.9655	0.00140639	99.834	64.362	1	S	RLTDPHRAPSDTGSLSPPWDQDRRMMFPPPG	X;X;X;X;X;X;X;X;X;X;X;X;X;X;X;Phospho (STY);X;X;X;X;X;X;X;X;X;X;X;X;X;X;X	XPPPPPPPPPPPPPPPPPPPPPPPXXXXXXX	LTDPHRAPSDT(0.004)GS(0.025)LS(0.971)PPWDQDRR	LT(-77.51)DPHRAPS(-36.08)DT(-23.52)GS(-15.97)LS(15.97)PPWDQDRR	15	4	-0.33047
O15344;O15344-2	92;92	O15344	O15344	Midline-1	MID1	>sp|O15344|TRI18_HUMAN E3 ubiquitin-protein ligase Midline-1 OS=Homo sapiens GN=MID1 PE=1 SV=1;>sp|O15344-2|TRI18_HUMAN Isoform 2 of E3 ubiquitin-protein ligase Midline-1 OS=Homo sapiens GN=MID1	0.999416	32.2873	0.00197259	156.17	106.83	2	S	VTLQNIIDRFQKASVSGPNSPSETRRERAFD	X;X;X;X;X;X;X;X;X;X;X;X;X;X;X;Phospho (STY);X;X;X;Phospho (STY);X;X;X;X;X;X;X;X;X;X;X	XXXXXXXXXXXXPPPPPPPPPPPPPPXXXXX	AS(0.001)VS(0.999)GPNS(0.891)PS(0.109)ETRR	AS(-32.29)VS(32.29)GPNS(9.14)PS(-9.14)ET(-43.19)RR	4	3	-0.20094
O15344;O15344-2	96;96	O15344	O15344	Midline-1	MID1	>sp|O15344|TRI18_HUMAN E3 ubiquitin-protein ligase Midline-1 OS=Homo sapiens GN=MID1 PE=1 SV=1;>sp|O15344-2|TRI18_HUMAN Isoform 2 of E3 ubiquitin-protein ligase Midline-1 OS=Homo sapiens GN=MID1	0.999999	62.3097	2.40862e-26	250.05	216.74	1;2	S	NIIDRFQKASVSGPNSPSETRRERAFDANTM	X;X;X;X;X;X;X;X;X;X;X;Phospho (STY);X;X;X;Phospho (STY);X;X;X;X;X;X;X;X;X;X;X;X;X;X;X	XXXXXXXXPPPPPPPPPPPPPPXXXXXXXXX	ASVSGPNS(1)PSETRR	AS(-157.68)VS(-121.01)GPNS(62.31)PS(-62.31)ET(-116.31)RR	8	3	-0.49768															0.56903	0.68693	0.39207	0.7922	0.63228	0.39978	0.44153	0.85463	0.83428	0.63338	0.82913	0.61564	0.87074
O15344;O15344-2	98;98	O15344	O15344	Midline-1	MID1	>sp|O15344|TRI18_HUMAN E3 ubiquitin-protein ligase Midline-1 OS=Homo sapiens GN=MID1 PE=1 SV=1;>sp|O15344-2|TRI18_HUMAN Isoform 2 of E3 ubiquitin-protein ligase Midline-1 OS=Homo sapiens GN=MID1	0.874076	8.41788	3.32027e-06	136.33	86.308	1	S	IDRFQKASVSGPNSPSETRRERAFDANTMTS	X;X;X;X;X;X;X;X;X;X;X;X;X;X;X;Phospho (STY);X;X;X;X;X;X;X;X;X;X;X;X;X;X;X	XXXXXXPPPPPPPPPPPPPPXXXXXXXXXXX	ASVSGPNS(0.126)PS(0.874)ETRR	AS(-74.37)VS(-52.44)GPNS(-8.42)PS(8.42)ET(-39.62)RR	10	2	-0.28269																												0.25836
O15355	537	O15355	O15355	Protein phosphatase 1G	PPM1G	>sp|O15355|PPM1G_HUMAN Protein phosphatase 1G OS=Homo sapiens GN=PPM1G PE=1 SV=1	1	171.459	5.12742e-07	308.25	265.01	1	S	LEEVLSTEGAEENGNSDKKKKAKRD______	X;X;X;X;X;X;X;X;X;X;X;X;X;X;X;Phospho (STY);X;X;X;X;X;X;X;X;X;X;X;X;X;X;X	PPPPPPPPPPPPPPPPPPPXXXXXXXXXXXX	LEEVLSTEGAEENGNS(1)DKK	LEEVLS(-199.98)T(-171.46)EGAEENGNS(171.46)DKK	16	3	0.4019																			0.95189	0.65873	0.91115	1.4635
O15355	195	O15355	O15355	Protein phosphatase 1G	PPM1G	>sp|O15355|PPM1G_HUMAN Protein phosphatase 1G OS=Homo sapiens GN=PPM1G PE=1 SV=1	0.527432	4.35937	7.15614e-06	61.12	37.23	1	S	EPGSQGLNGEAGPEDSTRETPSQENGPTAKA	X;X;X;X;X;X;X;X;X;X;X;X;X;X;X;Phospho (STY);X;X;X;X;X;X;X;X;X;X;X;X;X;X;X	PPPPPPPPPPPPPPPPPPPPPPPPPPPPPPX	SGGGTGEEPGSQGLNGEAGPEDS(0.527)T(0.193)RET(0.193)PS(0.073)QENGPT(0.013)AK	S(-49.89)GGGT(-49.77)GEEPGS(-46.18)QGLNGEAGPEDS(4.36)T(-4.36)RET(-4.36)PS(-8.61)QENGPT(-15.97)AK	23	4	-0.10147																					0.60226		0.2657	0.34359
O15355	201	O15355	O15355	Protein phosphatase 1G	PPM1G	>sp|O15355|PPM1G_HUMAN Protein phosphatase 1G OS=Homo sapiens GN=PPM1G PE=1 SV=1	0.462524	1.47183	2.9331e-09	76.001	64.892		S	LNGEAGPEDSTRETPSQENGPTAKAYTGFSS	X;X;X;X;X;X;X;X;X;X;X;X;X;X;X;Phospho (STY);X;X;X;X;X;X;X;X;X;X;X;X;X;X;X	PPPPPPPPPPPPPPPPPPPPPPPPXXXXXXX	SGGGTGEEPGSQGLNGEAGPEDS(0.101)T(0.101)RET(0.33)PS(0.463)QENGPT(0.006)AK	S(-75.08)GGGT(-75.08)GEEPGS(-70.06)QGLNGEAGPEDS(-6.62)T(-6.62)RET(-1.47)PS(1.47)QENGPT(-18.67)AK	29	4	-0.32741
O15357	240	O15357	O15357	Phosphatidylinositol 3,4,5-trisphosphate 5-phosphatase 2	INPPL1	>sp|O15357|SHIP2_HUMAN Phosphatidylinositol 3,4,5-trisphosphate 5-phosphatase 2 OS=Homo sapiens GN=INPPL1 PE=1 SV=2	0.982508	17.5115	3.18962e-05	125.36	95.993	1;4	S	VLSGLEILSKVFDQQSSPMVTRLLQQQNLPQ	X;X;X;X;X;X;X;X;X;X;X;X;X;X;X;Phospho (STY);Phospho (STY);X;Oxidation (M);X;Phospho (STY);X;X;X;X;X;X;X;X;X;X	PPPPPPPPPPPPPPPPPPPPPPXXXXXXXXX	VFDQQS(0.983)S(0.017)PMVTR	VFDQQS(17.51)S(-17.51)PMVT(-41.72)R	6	2	-0.86637	1.0345		0.37411	0.78094	0.80166	0.87991	0.73065	0.74695	0.87654	0.91446	0.86237	0.62336		0.70681		0.65759		0.59406	0.50437	0.60025		0.62358	0.64655	0.59214		0.48502	0.69465	0.51807
O15357	241	O15357	O15357	Phosphatidylinositol 3,4,5-trisphosphate 5-phosphatase 2	INPPL1	>sp|O15357|SHIP2_HUMAN Phosphatidylinositol 3,4,5-trisphosphate 5-phosphatase 2 OS=Homo sapiens GN=INPPL1 PE=1 SV=2	0.985045	18.7097	3.18962e-05	125.36	95.993	1;4	S	LSGLEILSKVFDQQSSPMVTRLLQQQNLPQT	X;X;X;X;X;X;X;X;X;X;X;X;X;X;Phospho (STY);Phospho (STY);X;Oxidation (M);X;Phospho (STY);X;X;X;X;X;X;X;X;X;X;X	PPPPPPPPPPPPPPPPPPPPPXXXXXXXXXX	LHS(0.887)EVDKVLS(0.114)GLEILS(0.084)KVFDQQS(0.965)S(0.985)PMVT(0.965)R	LHS(9.47)EVDKVLS(-9.47)GLEILS(-14.99)KVFDQQS(14.99)S(18.71)PMVT(14.99)R	24	3	1.4148	1.0345		0.37411	0.78094	0.80166	0.87991	0.73065	0.74695	0.87654	0.91446	0.86237	0.62336		0.70681					0.50437	0.60025		0.62358	0.64655	0.59214	0.57137	0.48502		0.51807
O15357;O15357-2	1003;761	O15357	O15357	Phosphatidylinositol 3,4,5-trisphosphate 5-phosphatase 2	INPPL1	>sp|O15357|SHIP2_HUMAN Phosphatidylinositol 3,4,5-trisphosphate 5-phosphatase 2 OS=Homo sapiens GN=INPPL1 PE=1 SV=2;>sp|O15357-2|SHIP2_HUMAN Isoform 2 of Phosphatidylinositol 3,4,5-trisphosphate 5-phosphatase 2 OS=Homo sapiens GN=INPPL1	0.995707	25.0249	1.66081e-08	73.805	51.16	1	S	VLEGVPHQLLPPEPPSPARAPVPSATKNKVA	X;X;X;X;X;X;X;X;X;X;X;X;X;X;X;Phospho (STY);X;X;X;X;X;X;X;X;X;X;X;X;X;X;X	PPPPPPPPPPPPPPPPPPPPPPPPPPPXXXX	NSFNNPAYYVLEGVPHQLLPPEPPS(0.996)PARAPVPS(0.003)AT(0.001)K	NS(-65.26)FNNPAY(-55.18)Y(-55.18)VLEGVPHQLLPPEPPS(25.02)PARAPVPS(-25.02)AT(-29.35)K	25	4	-0.3357			0.34394		0.51796
O15357;O15357-2	1011;769	O15357	O15357	Phosphatidylinositol 3,4,5-trisphosphate 5-phosphatase 2	INPPL1	>sp|O15357|SHIP2_HUMAN Phosphatidylinositol 3,4,5-trisphosphate 5-phosphatase 2 OS=Homo sapiens GN=INPPL1 PE=1 SV=2;>sp|O15357-2|SHIP2_HUMAN Isoform 2 of Phosphatidylinositol 3,4,5-trisphosphate 5-phosphatase 2 OS=Homo sapiens GN=INPPL1	0.356986	0	1.99551e-06	61.725	55.314		S	LLPPEPPSPARAPVPSATKNKVAITVPAPQL	X;X;X;X;X;X;X;X;X;X;X;X;X;X;X;Phospho (STY);X;X;X;X;X;X;X;X;X;X;X;X;X;X;X	PPPPPPPPPPPPPPPPPPPXXXXXXXXXXXX	NSFNNPAYYVLEGVPHQLLPPEPPS(0.286)PARAPVPS(0.357)AT(0.357)K	NS(-60.74)FNNPAY(-54.28)Y(-54.06)VLEGVPHQLLPPEPPS(-0.96)PARAPVPS(0)AT(0)K	33	4	-0.030567
O15372	183	O15372	O15372	Eukaryotic translation initiation factor 3 subunit H	EIF3H	>sp|O15372|EIF3H_HUMAN Eukaryotic translation initiation factor 3 subunit H OS=Homo sapiens GN=EIF3H PE=1 SV=1	1	157.378	8.23544e-06	182.28	66.503	1	S	RLTPKLMEVCKEKDFSPEALKKANITFEYMF	X;X;X;X;X;X;X;X;X;X;X;X;X;X;X;Phospho (STY);X;X;X;X;X;X;X;X;X;X;X;X;X;X;X	XXXXXXXXXXXXXPPPPPPPPPXXXXXXXXX	DFS(1)PEALKK	DFS(157.38)PEALKK	3	3	-0.59133	0.83546	0.50814	0.32382	0.62762	0.53174	0.65337	0.62267	0.53093	0.54835	0.59295	0.55712	0.47034	0.57069	0.62231	0.63086	0.69194	0.54631	0.59449		0.54811	0.43856	0.51206	0.5276	0.48225	0.61214	0.37333	0.6885
O15381;O15381-2	180;74	O15381	O15381	Nuclear valosin-containing protein-like	NVL	>sp|O15381|NVL_HUMAN Nuclear valosin-containing protein-like OS=Homo sapiens GN=NVL PE=1 SV=1;>sp|O15381-2|NVL_HUMAN Isoform 2 of Nuclear valosin-containing protein-like OS=Homo sapiens GN=NVL	1	96.7414	0.00236358	267.07	218.64	2	S	PAKDSEGGWFIDKTPSVKKDSFFLDLSCEKS	X;X;X;X;X;X;X;X;X;X;X;X;X;Phospho (STY);X;Phospho (STY);X;X;X;X;Phospho (STY);X;X;X;X;X;Phospho (STY);X;X;X;X	XXXPPPPPPPPPPPPPPPPXXXXXXXXXXXX	DSEGGWFIDKT(1)PS(1)VKK	DS(-78.97)EGGWFIDKT(78.97)PS(96.74)VKK	13	3	-0.98305	0.96379														0.52709	0.70218			0.38527	0.37545	0.4239	0.45175	0.39324	0.31411	0.35675		0.22262
O15381;O15381-2	185;79	O15381	O15381	Nuclear valosin-containing protein-like	NVL	>sp|O15381|NVL_HUMAN Nuclear valosin-containing protein-like OS=Homo sapiens GN=NVL PE=1 SV=1;>sp|O15381-2|NVL_HUMAN Isoform 2 of Nuclear valosin-containing protein-like OS=Homo sapiens GN=NVL	1	149.653	0.000658117	211.38	175.91	2	S	EGGWFIDKTPSVKKDSFFLDLSCEKSNPKKP	X;X;X;X;X;X;X;X;Phospho (STY);X;Phospho (STY);X;X;X;X;Phospho (STY);X;X;X;X;X;Phospho (STY);X;X;X;X;X;X;X;X;X	XXXXXXXXXXXXXPPPPPPPPPPPPXXXXXX	KDS(1)FFLDLS(1)CEK	KDS(149.65)FFLDLS(149.65)CEK	3	3	-1.8502																1.055
O15381;O15381-2	191;85	O15381	O15381	Nuclear valosin-containing protein-like	NVL	>sp|O15381|NVL_HUMAN Nuclear valosin-containing protein-like OS=Homo sapiens GN=NVL PE=1 SV=1;>sp|O15381-2|NVL_HUMAN Isoform 2 of Nuclear valosin-containing protein-like OS=Homo sapiens GN=NVL	1	149.653	9.23321e-17	211.38	175.91	1;2	S	DKTPSVKKDSFFLDLSCEKSNPKKPITEIQD	X;X;Phospho (STY);X;Phospho (STY);X;X;X;X;Phospho (STY);X;X;X;X;X;Phospho (STY);X;X;X;X;X;X;X;X;X;X;Phospho (STY);X;X;X;X	XXXXXXXPPPPPPPPPPPPXXXXXXXXXXXX	KDS(1)FFLDLS(1)CEK	KDS(149.65)FFLDLS(149.65)CEK	9	3	-1.8502																1.055
O15381;O15381-2;O15381-3;O15381-5	211;105;14;120	O15381	O15381	Nuclear valosin-containing protein-like	NVL	>sp|O15381|NVL_HUMAN Nuclear valosin-containing protein-like OS=Homo sapiens GN=NVL PE=1 SV=1;>sp|O15381-2|NVL_HUMAN Isoform 2 of Nuclear valosin-containing protein-like OS=Homo sapiens GN=NVL;>sp|O15381-3|NVL_HUMAN Isoform 3 of Nuclear valosin-containing	0.988533	19.3556	0.000299441	111.07	67.311	2	S	NPKKPITEIQDSKDSSLLESDMKRKGKLKNK	X;X;X;X;X;X;Phospho (STY);X;X;X;X;X;X;X;X;Phospho (STY);X;X;X;Phospho (STY);X;X;X;X;X;X;X;X;X;X;X	XXXPPPPPPPPPPPPPPPPPPPPXXXXXXXX	DS(0.011)S(0.989)LLES(1)DMK	DS(-19.36)S(19.36)LLES(59.03)DMK	3	2	0.37594
O15381;O15381-2;O15381-3;O15381-5	215;109;18;124	O15381	O15381	Nuclear valosin-containing protein-like	NVL	>sp|O15381|NVL_HUMAN Nuclear valosin-containing protein-like OS=Homo sapiens GN=NVL PE=1 SV=1;>sp|O15381-2|NVL_HUMAN Isoform 2 of Nuclear valosin-containing protein-like OS=Homo sapiens GN=NVL;>sp|O15381-3|NVL_HUMAN Isoform 3 of Nuclear valosin-containing	1	81.5225	0.000299441	111.07	67.311	2	S	PITEIQDSKDSSLLESDMKRKGKLKNKGSKR	X;X;X;X;X;X;X;X;X;X;Phospho (STY);Phospho (STY);X;X;X;Phospho (STY);X;X;X;X;X;X;X;X;X;X;X;X;X;X;X	XXXXXXXXXPPPPPPPPPPXXXXXXXXXXXX	DS(0.012)S(0.988)LLES(1)DMK	DS(-19.23)S(19.23)LLES(81.52)DMK	7	2	0.034179
O15381;O15381-2	134;28	O15381	O15381	Nuclear valosin-containing protein-like	NVL	>sp|O15381|NVL_HUMAN Nuclear valosin-containing protein-like OS=Homo sapiens GN=NVL PE=1 SV=1;>sp|O15381-2|NVL_HUMAN Isoform 2 of Nuclear valosin-containing protein-like OS=Homo sapiens GN=NVL	0.999991	50.161	4.12593e-09	173.19	131.13	2	S	MNSSLLSLYRKGNPDSVSNTPEMEQRETTSS	X;X;X;X;X;X;X;X;X;X;X;X;X;X;X;Phospho (STY);X;Phospho (STY);X;Phospho (STY);X;X;X;X;X;X;X;X;X;X;X	XXXXXXXXXXXPPPPPPPPPPPPPPPPPPPP	GNPDS(1)VS(0.962)NT(0.038)PEMEQR	GNPDS(50.16)VS(13.98)NT(-13.98)PEMEQR	5	2	-0.25328		0.47986	0.35789	0.48875	0.66623	0.74374	0.47138	0.67791	0.37445	0.35873					0.6603	0.75047	0.70327	0.62164	0.63074	0.59651	0.59201	0.64376	0.65829	0.60491	0.63167
O15381;O15381-2	136;30	O15381	O15381	Nuclear valosin-containing protein-like	NVL	>sp|O15381|NVL_HUMAN Nuclear valosin-containing protein-like OS=Homo sapiens GN=NVL PE=1 SV=1;>sp|O15381-2|NVL_HUMAN Isoform 2 of Nuclear valosin-containing protein-like OS=Homo sapiens GN=NVL	0.980216	16.9487	4.02216e-06	129.85	93.558	2	S	SSLLSLYRKGNPDSVSNTPEMEQRETTSSTP	X;X;X;X;X;X;X;X;X;X;X;X;X;Phospho (STY);X;Phospho (STY);X;X;X;X;X;X;X;X;X;X;X;X;X;X;X	XXXXXXXXXPPPPPPPPPPPPPPPXXXXXXX	GNPDS(1)VS(0.98)NT(0.02)PEMEQR	GNPDS(34.66)VS(16.95)NT(-16.95)PEMEQR	7	2	-0.17663		0.47986			0.66623		0.47138	0.67791		0.35873									0.66632				0.67697
O15417	2538	O15417	O15417	Trinucleotide repeat-containing gene 18 protein	TNRC18	>sp|O15417|TNC18_HUMAN Trinucleotide repeat-containing gene 18 protein OS=Homo sapiens GN=TNRC18 PE=1 SV=3	0.725387	6.61022	0.00112962	56.461	24.544	1	S	GDLAQEPGPGLTFEDSGNPKSPDKAQAEQDG	X;X;X;X;X;X;X;X;X;X;X;X;X;X;X;Phospho (STY);X;X;X;X;X;X;X;X;X;X;X;X;X;X;X	PPPPPPPPPPPPPPPPPPPPPPPPXXXXXXX	ATDGDLAQEPGPGLT(0.158)FEDS(0.725)GNPKS(0.116)PDK	AT(-45.58)DGDLAQEPGPGLT(-6.61)FEDS(6.61)GNPKS(-7.95)PDK	19	3	1.0151
O15417	2543	O15417	O15417	Trinucleotide repeat-containing gene 18 protein	TNRC18	>sp|O15417|TNC18_HUMAN Trinucleotide repeat-containing gene 18 protein OS=Homo sapiens GN=TNRC18 PE=1 SV=3	0.993608	22.0981	2.36795e-08	110.6	86.711	1	S	EPGPGLTFEDSGNPKSPDKAQAEQDGAEESE	X;X;X;X;X;X;X;X;X;X;X;X;X;X;X;Phospho (STY);X;X;X;X;X;X;X;X;X;X;X;X;X;X;X	PPPPPPPPPPPPPPPPPPPXXXXXXXXXXXX	ATDGDLAQEPGPGLTFEDS(0.006)GNPKS(0.994)PDK	AT(-103.37)DGDLAQEPGPGLT(-35.78)FEDS(-22.1)GNPKS(22.1)PDK	24	3	-0.19944
O15417;O15417-2	991;991	O15417	O15417	Trinucleotide repeat-containing gene 18 protein	TNRC18	>sp|O15417|TNC18_HUMAN Trinucleotide repeat-containing gene 18 protein OS=Homo sapiens GN=TNRC18 PE=1 SV=3;>sp|O15417-2|TNC18_HUMAN Isoform 2 of Trinucleotide repeat-containing gene 18 protein OS=Homo sapiens GN=TNRC18	1	124.469	0.00128392	174.72	103.44	3	S	PGLAAGPAGTYGKAVSPPPSPRASPVAALKA	X;X;X;X;X;X;X;X;X;X;X;X;X;X;X;Phospho (STY);X;X;X;Phospho (STY);X;X;X;Phospho (STY);X;X;X;X;X;X;X	XXXXXXXXXXXXXPPPPPPPPPPPPPPPPPX	AVS(1)PPPS(1)PRAS(1)PVAALK	AVS(124.47)PPPS(124.47)PRAS(124.47)PVAALK	3	3	0.25072					1.1464			0.60547							0.80868	0.56677	0.51662		0.50203	0.38323	0.38954	0.4563	0.43163	0.32292
O15417;O15417-2	995;995	O15417	O15417	Trinucleotide repeat-containing gene 18 protein	TNRC18	>sp|O15417|TNC18_HUMAN Trinucleotide repeat-containing gene 18 protein OS=Homo sapiens GN=TNRC18 PE=1 SV=3;>sp|O15417-2|TNC18_HUMAN Isoform 2 of Trinucleotide repeat-containing gene 18 protein OS=Homo sapiens GN=TNRC18	1	124.469	0.00128392	174.72	103.44	3	S	AGPAGTYGKAVSPPPSPRASPVAALKAKVIQ	X;X;X;X;X;X;X;X;X;X;X;Phospho (STY);X;X;X;Phospho (STY);X;X;X;Phospho (STY);X;X;X;X;X;X;X;X;X;X;X	XXXXXXXXXPPPPPPPPPPPPPPPPPXXXXX	AVS(1)PPPS(1)PRAS(1)PVAALK	AVS(124.47)PPPS(124.47)PRAS(124.47)PVAALK	7	3	0.25072					1.1464			0.60547							0.80868	0.56677	0.51662		0.50203	0.38323	0.38954	0.4563	0.43163	0.32292
O15417;O15417-2	999;999	O15417	O15417	Trinucleotide repeat-containing gene 18 protein	TNRC18	>sp|O15417|TNC18_HUMAN Trinucleotide repeat-containing gene 18 protein OS=Homo sapiens GN=TNRC18 PE=1 SV=3;>sp|O15417-2|TNC18_HUMAN Isoform 2 of Trinucleotide repeat-containing gene 18 protein OS=Homo sapiens GN=TNRC18	1	124.469	0.00128392	174.72	103.44	3	S	GTYGKAVSPPPSPRASPVAALKAKVIQKLED	X;X;X;X;X;X;X;Phospho (STY);X;X;X;Phospho (STY);X;X;X;Phospho (STY);X;X;X;X;X;X;X;X;X;X;X;X;X;X;X	XXXXXPPPPPPPPPPPPPPPPPXXXXXXXXX	AVS(1)PPPS(1)PRAS(1)PVAALK	AVS(124.47)PPPS(124.47)PRAS(124.47)PVAALK	11	3	0.25072					1.1464			0.60547							0.80868	0.56677	0.51662		0.50203	0.38323	0.38954	0.4563	0.43163	0.32292
O15417;O15417-2;O15417-3	1127;1127;63	O15417	O15417	Trinucleotide repeat-containing gene 18 protein	TNRC18	>sp|O15417|TNC18_HUMAN Trinucleotide repeat-containing gene 18 protein OS=Homo sapiens GN=TNRC18 PE=1 SV=3;>sp|O15417-2|TNC18_HUMAN Isoform 2 of Trinucleotide repeat-containing gene 18 protein OS=Homo sapiens GN=TNRC18;>sp|O15417-3|TNC18_HUMAN Isoform 3 of	1	129.606	0.00066057	240.8	183.01	2	S	PDVPLPADGPERLALSPEDKPIRLSPSKITE	X;X;X;X;X;X;X;X;X;X;X;X;X;X;X;Phospho (STY);X;X;X;X;X;X;X;X;Phospho (STY);X;Phospho (STY);X;X;X;X	XXXXXXXXXXXXPPPPPPPPPPPPPPPPXXX	LALS(1)PEDKPIRLS(0.927)PS(0.073)K	LALS(129.61)PEDKPIRLS(11.02)PS(-11.02)K	4	3	0.22591	0.97759	0.79055	0.38734		0.67818	0.86879	0.61976		0.48173	0.97835	0.64282	0.53191	0.53057	0.38685	0.73653	0.35425	0.78917	0.9132	0.43951	0.36717	0.52967	0.63994	0.41962	0.36485		0.41208	0.60992	0.22105
O15417;O15417-2;O15417-3	1136;1136;72	O15417	O15417	Trinucleotide repeat-containing gene 18 protein	TNRC18	>sp|O15417|TNC18_HUMAN Trinucleotide repeat-containing gene 18 protein OS=Homo sapiens GN=TNRC18 PE=1 SV=3;>sp|O15417-2|TNC18_HUMAN Isoform 2 of Trinucleotide repeat-containing gene 18 protein OS=Homo sapiens GN=TNRC18;>sp|O15417-3|TNC18_HUMAN Isoform 3 of	0.999784	36.6532	0.00066057	240.8	183.01	2	S	PERLALSPEDKPIRLSPSKITEPLREGPEEE	X;X;X;X;X;X;Phospho (STY);X;X;X;X;X;X;X;X;Phospho (STY);X;X;X;X;X;X;X;X;X;X;X;X;X;X;X	XXXPPPPPPPPPPPPPPPPXXXXXXXXXXXX	LALS(1)PEDKPIRLS(1)PSK	LALS(225.23)PEDKPIRLS(36.65)PS(-36.65)K	13	3	0.73787	0.97759	0.79055	0.38734		0.67818	0.86879	0.61976		0.48173	0.97835	0.64282			0.38685			0.78917	0.9132	0.43951		0.52967	0.63994	0.41962	0.36485		0.41208	0.60992	0.22105
O15417;O15417-2;O15417-3	1138;1138;74	O15417	O15417	Trinucleotide repeat-containing gene 18 protein	TNRC18	>sp|O15417|TNC18_HUMAN Trinucleotide repeat-containing gene 18 protein OS=Homo sapiens GN=TNRC18 PE=1 SV=3;>sp|O15417-2|TNC18_HUMAN Isoform 2 of Trinucleotide repeat-containing gene 18 protein OS=Homo sapiens GN=TNRC18;>sp|O15417-3|TNC18_HUMAN Isoform 3 of	0.997151	25.44	0.00198269	223.39	187.8	2	S	RLALSPEDKPIRLSPSKITEPLREGPEEEPL	X;X;X;X;Phospho (STY);X;X;X;X;X;X;X;X;X;X;Phospho (STY);X;X;X;X;X;X;X;X;X;X;X;X;X;X;X	XPPPPPPPPPPPPPPPPXXXXXXXXXXXXXX	LALS(1)PEDKPIRLS(0.003)PS(0.997)K	LALS(199.32)PEDKPIRLS(-25.44)PS(25.44)K	15	3	0.40266												0.53191	0.53057	0.38685	0.73653	0.35425				0.36717				0.36485
O15427	464	O15427	O15427	Monocarboxylate transporter 4	SLC16A3	>sp|O15427|MOT4_HUMAN Monocarboxylate transporter 4 OS=Homo sapiens GN=SLC16A3 PE=1 SV=1	0.9998	36.9991	1.00374e-07	145.52	120.68	1;2	S	AEPEKNGEVVHTPETSV______________	X;X;X;X;X;X;X;X;X;X;X;Phospho (STY);X;X;X;Phospho (STY);X;X;X;X;X;X;X;X;X;X;X;X;X;X;X	XXXXXPPPPPPPPPPPPXXXXXXXXXXXXXX	NGEVVHTPETS(1)V	NGEVVHT(-66.23)PET(-37)S(37)V	11	2	0.36674												0.6187				0.26011	0.22139	0.25521	0.25381	0.26257	0.4304	0.23908	0.25365	0.19804	0.31217	0.23162	0.31972	0.2039
O15439;O15439-4;O15439-3;O15439-2	668;593;668;668	O15439	O15439	Multidrug resistance-associated protein 4	ABCC4	>sp|O15439|MRP4_HUMAN Multidrug resistance-associated protein 4 OS=Homo sapiens GN=ABCC4 PE=1 SV=3;>sp|O15439-4|MRP4_HUMAN Isoform 4 of Multidrug resistance-associated protein 4 OS=Homo sapiens GN=ABCC4;>sp|O15439-3|MRP4_HUMAN Isoform 3 of Multidrug resist	0.493838	0.0584325	0.00061835	103.45	65.837		S	TFSESSVWSQQSSRPSLKDGALESQDTENVP	X;X;X;X;X;X;X;X;X;X;X;X;X;X;X;Phospho (STY);X;X;X;X;X;X;X;X;X;X;X;X;X;X;X	PPPPPPPPPPPPPPPPPPXXXXXXXXXXXXX	TFSESSVWS(0.003)QQS(0.016)S(0.487)RPS(0.494)LK	T(-93.97)FS(-93.08)ES(-70.97)S(-50)VWS(-22.76)QQS(-14.81)S(-0.06)RPS(0.06)LK	16	3	-0.8906
O15440;O15440-5	505;505	O15440	O15440	Multidrug resistance-associated protein 5	ABCC5	>sp|O15440|MRP5_HUMAN Multidrug resistance-associated protein 5 OS=Homo sapiens GN=ABCC5 PE=1 SV=2;>sp|O15440-5|MRP5_HUMAN Isoform 5 of Multidrug resistance-associated protein 5 OS=Homo sapiens GN=ABCC5	0.994088	22.2768	0.000586076	156.58	129.04	2	S	IEMKNATLAWDSSHSSIQNSPKLTPKMKKDK	X;X;X;X;X;X;X;X;X;X;X;X;X;X;X;Phospho (STY);X;X;X;Phospho (STY);X;X;X;X;X;X;X;X;X;X;X	XXXXPPPPPPPPPPPPPPPPPPXXXXXXXXX	NATLAWDSSHS(0.006)S(0.994)IQNS(1)PK	NAT(-130.76)LAWDS(-73.36)S(-45.65)HS(-22.28)S(22.28)IQNS(80.84)PK	12	3	-1.0381
O15440;O15440-5	509;509	O15440	O15440	Multidrug resistance-associated protein 5	ABCC5	>sp|O15440|MRP5_HUMAN Multidrug resistance-associated protein 5 OS=Homo sapiens GN=ABCC5 PE=1 SV=2;>sp|O15440-5|MRP5_HUMAN Isoform 5 of Multidrug resistance-associated protein 5 OS=Homo sapiens GN=ABCC5	1	80.842	0.000203251	212.82	170.73	1;2	S	NATLAWDSSHSSIQNSPKLTPKMKKDKRASR	X;X;X;X;X;X;X;X;X;X;X;Phospho (STY);X;X;X;Phospho (STY);X;X;X;X;X;X;X;X;X;X;X;X;X;X;X	PPPPPPPPPPPPPPPPPPXXXXXXXXXXXXX	NATLAWDSSHS(0.006)S(0.994)IQNS(1)PK	NAT(-130.76)LAWDS(-73.36)S(-45.65)HS(-22.28)S(22.28)IQNS(80.84)PK	16	3	-1.0381
O15446;O15446-2	459;461	O15446	O15446	DNA-directed RNA polymerase I subunit RPA34	CD3EAP	>sp|O15446|RPA34_HUMAN DNA-directed RNA polymerase I subunit RPA34 OS=Homo sapiens GN=CD3EAP PE=1 SV=1;>sp|O15446-2|RPA34_HUMAN Isoform 2 of DNA-directed RNA polymerase I subunit RPA34 OS=Homo sapiens GN=CD3EAP	0.762291	3.44203	2.63942e-05	62.858	45.798	2	S	ELPGEGQPEARATPGSTKKRKKQSQESRMPE	X;X;X;X;X;X;X;X;X;X;X;X;Phospho (STY);X;X;Phospho (STY);Phospho (STY);X;X;X;X;X;X;X;X;X;X;X;X;X;X	PPPPPPPPPPPPPPPPPPXXXXXXXXXXXXX	ERGHTVTEPIQPLEPELPGEGQPEARAT(0.762)PGS(0.762)T(0.475)K	ERGHT(-41.09)VT(-41.2)EPIQPLEPELPGEGQPEARAT(3.44)PGS(3.44)T(-3.44)K	31	4	-0.085761		1.7931
O15446;O15446-2	27;29	O15446	O15446	DNA-directed RNA polymerase I subunit RPA34	CD3EAP	>sp|O15446|RPA34_HUMAN DNA-directed RNA polymerase I subunit RPA34 OS=Homo sapiens GN=CD3EAP PE=1 SV=1;>sp|O15446-2|RPA34_HUMAN Isoform 2 of DNA-directed RNA polymerase I subunit RPA34 OS=Homo sapiens GN=CD3EAP	1	77.1147	0.000268063	226.65	161.47	1	S	FSCPPNFTAKPPASESPRFSLEALTGPDTEL	X;X;X;X;X;X;X;X;X;X;X;X;X;X;X;Phospho (STY);X;X;X;X;X;X;X;X;X;X;X;X;X;X;X	PPPPPPPPPPPPPPPPPPXXXXXXXXXXXXX	FSCPPNFTAKPPASES(1)PR	FS(-171.54)CPPNFT(-127.29)AKPPAS(-77.11)ES(77.11)PR	16	3	-0.27079	0.9766	0.63132	0.44384	0.76056	0.71521	0.98917	0.63268	0.79261	0.65383	0.79246	0.69467	0.50316	0.60354	0.61073	0.88667	1.0425	0.86101	0.83588	0.83677	0.8559	0.83027	0.84995	0.90469	0.81538	1.0186	0.18964	0.82734	0.20148
O15446;O15446-2	124;126	O15446	O15446	DNA-directed RNA polymerase I subunit RPA34	CD3EAP	>sp|O15446|RPA34_HUMAN DNA-directed RNA polymerase I subunit RPA34 OS=Homo sapiens GN=CD3EAP PE=1 SV=1;>sp|O15446-2|RPA34_HUMAN Isoform 2 of DNA-directed RNA polymerase I subunit RPA34 OS=Homo sapiens GN=CD3EAP	0.452227	0	5.1644e-07	73.676	58.605		S	SAPQGTLRILEGPQQSLSGSPLQPIPASPPP	X;X;X;X;X;X;X;X;X;X;X;X;X;X;X;Phospho (STY);X;X;X;X;X;X;X;X;X;X;X;Phospho (STY);X;X;X	XXXXXXXXPPPPPPPPPPPPPPPPPPPPPPP	ILEGPQQS(0.452)LS(0.452)GS(0.096)PLQPIPAS(1)PPPQIPPGLRPR	ILEGPQQS(0)LS(0)GS(-6.75)PLQPIPAS(47.21)PPPQIPPGLRPR	8	3	0.084862
O15446;O15446-2	126;128	O15446	O15446	DNA-directed RNA polymerase I subunit RPA34	CD3EAP	>sp|O15446|RPA34_HUMAN DNA-directed RNA polymerase I subunit RPA34 OS=Homo sapiens GN=CD3EAP PE=1 SV=1;>sp|O15446-2|RPA34_HUMAN Isoform 2 of DNA-directed RNA polymerase I subunit RPA34 OS=Homo sapiens GN=CD3EAP	0.678868	5.25782	2.58141e-11	95.519	95.519	2	S	PQGTLRILEGPQQSLSGSPLQPIPASPPPQI	X;X;X;X;X;X;X;X;X;X;X;X;X;X;X;Phospho (STY);X;X;X;X;X;X;X;X;X;Phospho (STY);X;X;X;X;X	XXXXXXPPPPPPPPPPPPPPPPPPPPPPPPP	ILEGPQQS(0.119)LS(0.679)GS(0.202)PLQPIPAS(1)PPPQIPPGLRPR	ILEGPQQS(-7.57)LS(5.26)GS(-5.26)PLQPIPAS(42.88)PPPQIPPGLRPR	10	3	-0.41926
O15446;O15446-2	128;130	O15446	O15446	DNA-directed RNA polymerase I subunit RPA34	CD3EAP	>sp|O15446|RPA34_HUMAN DNA-directed RNA polymerase I subunit RPA34 OS=Homo sapiens GN=CD3EAP PE=1 SV=1;>sp|O15446-2|RPA34_HUMAN Isoform 2 of DNA-directed RNA polymerase I subunit RPA34 OS=Homo sapiens GN=CD3EAP	0.991834	20.8845	2.30726e-22	110.12	96.908	2	S	GTLRILEGPQQSLSGSPLQPIPASPPPQIPP	X;X;X;X;X;X;X;X;X;X;X;X;X;X;X;Phospho (STY);X;X;X;X;X;X;X;Phospho (STY);X;X;X;X;X;X;X	XXXXPPPPPPPPPPPPPPPPPPPPPPPPPPP	ILEGPQQSLS(0.008)GS(0.992)PLQPIPAS(1)PPPQIPPGLRPR	ILEGPQQS(-41.22)LS(-20.88)GS(20.88)PLQPIPAS(57.36)PPPQIPPGLRPR	12	4	0.2025	0.92171		0.56052		0.76951		0.80343								1.0316			0.78623						0.81404
O15446;O15446-2	136;138	O15446	O15446	DNA-directed RNA polymerase I subunit RPA34	CD3EAP	>sp|O15446|RPA34_HUMAN DNA-directed RNA polymerase I subunit RPA34 OS=Homo sapiens GN=CD3EAP PE=1 SV=1;>sp|O15446-2|RPA34_HUMAN Isoform 2 of DNA-directed RNA polymerase I subunit RPA34 OS=Homo sapiens GN=CD3EAP	1	77.316	2.30726e-22	110.12	96.908	2	S	PQQSLSGSPLQPIPASPPPQIPPGLRPRFCA	X;X;X;Phospho (STY);X;Phospho (STY);X;Phospho (STY);X;X;X;X;X;X;X;Phospho (STY);X;X;X;X;X;X;X;X;X;X;X;X;X;X;X	PPPPPPPPPPPPPPPPPPPPPPPPPPPPXXX	ILEGPQQS(0.052)LS(0.099)GS(0.849)PLQPIPAS(1)PPPQIPPGLRPR	ILEGPQQS(-12.12)LS(-9.33)GS(9.33)PLQPIPAS(77.32)PPPQIPPGLRPR	20	3	0.71551	0.92171		0.56052		0.76951		0.80343								1.0316			0.78623						0.81404
O15446;O15446-2	285;287	O15446	O15446	DNA-directed RNA polymerase I subunit RPA34	CD3EAP	>sp|O15446|RPA34_HUMAN DNA-directed RNA polymerase I subunit RPA34 OS=Homo sapiens GN=CD3EAP PE=1 SV=1;>sp|O15446-2|RPA34_HUMAN Isoform 2 of DNA-directed RNA polymerase I subunit RPA34 OS=Homo sapiens GN=CD3EAP	0.999149	31.1216	2.12585e-50	200.33	130.18	1	S	KQEQINTEPLEDTVLSPTKKRKRQKGTEGME	X;X;X;X;X;X;X;X;X;X;X;X;X;X;X;Phospho (STY);X;X;X;X;X;X;X;X;X;X;X;X;X;X;X	XPPPPPPPPPPPPPPPPPPPXXXXXXXXXXX	QEQINTEPLEDTVLS(0.999)PT(0.001)K	QEQINT(-117.25)EPLEDT(-40.99)VLS(31.12)PT(-31.12)K	15	3	0.1066	0.95351	0.91504	0.43111	0.89228	0.72715	0.94307	0.83846	0.80388	0.50279		0.26166	0.19577	0.129	0.10335	0.81714		0.70576	0.72178	0.8523	0.73166	0.71507	0.72488	1.1214	0.44195	0.86861	0.53814		0.3149
O15446;O15446-2	420;422	O15446	O15446	DNA-directed RNA polymerase I subunit RPA34	CD3EAP	>sp|O15446|RPA34_HUMAN DNA-directed RNA polymerase I subunit RPA34 OS=Homo sapiens GN=CD3EAP PE=1 SV=1;>sp|O15446-2|RPA34_HUMAN Isoform 2 of DNA-directed RNA polymerase I subunit RPA34 OS=Homo sapiens GN=CD3EAP	0.59409	4.04716	1.75839e-09	87.171	63.782	1	S	GPELPDDLEPQAAPTSTKKKKKKKERGHTVT	X;X;X;X;X;X;X;X;X;X;X;X;X;X;X;Phospho (STY);X;X;X;X;X;X;X;X;X;X;X;X;X;X;X	PPPPPPPPPPPPPPPPPPPXXXXXXXXXXXX	QQDATVEPETEVVGPELPDDLEPQAAPT(0.234)S(0.594)T(0.172)KK	QQDAT(-83.85)VEPET(-75.75)EVVGPELPDDLEPQAAPT(-4.05)S(4.05)T(-5.38)KK	29	3	0.16536
O15446;O15446-2	172;174	O15446	O15446	DNA-directed RNA polymerase I subunit RPA34	CD3EAP	>sp|O15446|RPA34_HUMAN DNA-directed RNA polymerase I subunit RPA34 OS=Homo sapiens GN=CD3EAP PE=1 SV=1;>sp|O15446-2|RPA34_HUMAN Isoform 2 of DNA-directed RNA polymerase I subunit RPA34 OS=Homo sapiens GN=CD3EAP	1	186.363	1.13587e-13	306.44	227.91	1;2	S	PVTGPRSALAPNLLTSGKKKKEMQVTEAPVT	X;X;Phospho (STY);X;X;X;X;X;X;X;X;X;X;X;Phospho (STY);Phospho (STY);X;X;X;X;X;X;X;X;X;X;X;X;X;X;X	XXXXXXPPPPPPPPPPPPPXXXXXXXXXXXX	SALAPNLLT(1)S(1)GKK	S(-155.4)ALAPNLLT(155.4)S(186.36)GKK	10	3	-0.033487	0.87971	0.60823	0.29187	0.32165		0.18349		0.13999							0.80611	0.61378	0.25154	0.38539	0.20166	0.15198	0.15154	0.13019		0.050053
O15498;O15498-2	114;114	O15498	O15498	Synaptobrevin homolog YKT6	YKT6	>sp|O15498|YKT6_HUMAN Synaptobrevin homolog YKT6 OS=Homo sapiens GN=YKT6 PE=1 SV=1;>sp|O15498-2|YKT6_HUMAN Isoform 2 of Synaptobrevin homolog YKT6 OS=Homo sapiens GN=YKT6	0.974353	18.5298	9.43675e-05	64.069	51.156	1	S	DEFSKQVDRIDWPVGSPATIHYPALDGHLSR	X;X;X;X;X;X;X;X;X;X;X;X;X;X;X;Phospho (STY);X;X;X;X;X;X;X;X;X;X;X;X;X;X;X	XXXXXPPPPPPPPPPPPPPPPPPPPPPPPPP	QVDRIDWPVGS(0.974)PAT(0.012)IHY(0.014)PALDGHLSR	QVDRIDWPVGS(18.53)PAT(-19.15)IHY(-18.53)PALDGHLS(-38.76)R	11	4	0.45068	0.6069
O15504;O15504-3	340;112	O15504	O15504	Nucleoporin-like protein 2	NUPL2	>sp|O15504|NUPL2_HUMAN Nucleoporin-like protein 2 OS=Homo sapiens GN=NUPL2 PE=1 SV=1;>sp|O15504-3|NUPL2_HUMAN Isoform 3 of Nucleoporin-like protein 2 OS=Homo sapiens GN=NUPL2	0.740895	5.66484	0.00108717	46.371	22.342	1	S	TGPVRAPVAPAFGGGSSVAGFGSPGSHSHTA	X;X;X;X;X;X;X;X;X;X;X;X;X;X;X;Phospho (STY);X;X;X;X;X;X;X;X;X;X;X;X;X;X;X	XXXXXPPPPPPPPPPPPPPPPPPPPPPPPPP	APVAPAFGGGS(0.741)S(0.201)VAGFGS(0.041)PGS(0.006)HS(0.003)HT(0.007)AFS(0.001)K	APVAPAFGGGS(5.66)S(-5.66)VAGFGS(-12.61)PGS(-20.63)HS(-24.31)HT(-20.24)AFS(-27.45)K	11	3	-1.3043
O15504;O15504-3	347;119	O15504	O15504	Nucleoporin-like protein 2	NUPL2	>sp|O15504|NUPL2_HUMAN Nucleoporin-like protein 2 OS=Homo sapiens GN=NUPL2 PE=1 SV=1;>sp|O15504-3|NUPL2_HUMAN Isoform 3 of Nucleoporin-like protein 2 OS=Homo sapiens GN=NUPL2	0.987587	19.3987	6.29164e-05	118.5	98.777	1	S	VAPAFGGGSSVAGFGSPGSHSHTAFSKPSSD	X;X;X;X;X;X;X;X;X;X;X;X;X;X;X;Phospho (STY);X;X;X;X;X;X;X;X;X;X;X;X;X;X;X	PPPPPPPPPPPPPPPPPPPPPPPPPPPXXXX	APVAPAFGGGSS(0.001)VAGFGS(0.988)PGS(0.011)HSHTAFSK	APVAPAFGGGS(-37.3)S(-31.5)VAGFGS(19.4)PGS(-19.4)HS(-37.33)HT(-52.69)AFS(-80.95)K	18	4	-0.23445							0.48034								0.60927
O15504;O15504-3	350;122	O15504	O15504	Nucleoporin-like protein 2	NUPL2	>sp|O15504|NUPL2_HUMAN Nucleoporin-like protein 2 OS=Homo sapiens GN=NUPL2 PE=1 SV=1;>sp|O15504-3|NUPL2_HUMAN Isoform 3 of Nucleoporin-like protein 2 OS=Homo sapiens GN=NUPL2	0.855035	8.43999	0.000396758	102.36	87.24	1	S	AFGGGSSVAGFGSPGSHSHTAFSKPSSDTFG	X;X;X;X;X;X;X;X;X;X;X;X;X;X;X;Phospho (STY);X;X;X;X;X;X;X;X;X;X;X;X;X;X;X	PPPPPPPPPPPPPPPPPPPPPPPPXXXXXXX	APVAPAFGGGS(0.001)S(0.003)VAGFGS(0.122)PGS(0.855)HS(0.019)HTAFSK	APVAPAFGGGS(-31.95)S(-24.42)VAGFGS(-8.44)PGS(8.44)HS(-16.59)HT(-39.13)AFS(-64.19)K	21	4	0.096709		0.7704	0.64015		0.98699			0.86234	0.55945							1.0944	0.68447							0.69802
O15504;O15504-2	104;104	O15504	O15504	Nucleoporin-like protein 2	NUPL2	>sp|O15504|NUPL2_HUMAN Nucleoporin-like protein 2 OS=Homo sapiens GN=NUPL2 PE=1 SV=1;>sp|O15504-2|NUPL2_HUMAN Isoform 2 of Nucleoporin-like protein 2 OS=Homo sapiens GN=NUPL2	0.670845	3.91878	8.84449e-05	150.13	115.86	1	S	TNRKEGFGLSENPFASLSPDEQKDEKKLLEG	X;X;X;X;X;X;X;X;X;X;X;X;X;X;X;Phospho (STY);X;X;X;X;X;X;X;X;X;X;X;X;X;X;X	XXXXPPPPPPPPPPPPPPPPPPPPPPXXXXX	EGFGLS(0.057)ENPFAS(0.671)LS(0.272)PDEQKDEK	EGFGLS(-10.7)ENPFAS(3.92)LS(-3.92)PDEQKDEK	12	3	-0.57762				0.98321										0.73267						0.67998
O15504;O15504-2	106;106	O15504	O15504	Nucleoporin-like protein 2	NUPL2	>sp|O15504|NUPL2_HUMAN Nucleoporin-like protein 2 OS=Homo sapiens GN=NUPL2 PE=1 SV=1;>sp|O15504-2|NUPL2_HUMAN Isoform 2 of Nucleoporin-like protein 2 OS=Homo sapiens GN=NUPL2	1	76.0655	1.54498e-142	257.2	222.93	1	S	RKEGFGLSENPFASLSPDEQKDEKKLLEGIV	X;X;X;X;X;X;X;X;X;X;X;X;X;X;X;Phospho (STY);X;X;X;X;X;X;X;X;X;X;X;X;X;X;X	XXPPPPPPPPPPPPPPPPPPPPPPXXXXXXX	EGFGLSENPFASLS(1)PDEQK	EGFGLS(-133.76)ENPFAS(-76.07)LS(76.07)PDEQK	14	2	-0.093934	0.94358	0.80671	0.53629		0.50228	0.86046	1.0193	0.97126	0.95009	0.8348	1.0319	0.72218	1.2881	0.72639	0.61273	0.99431	1.0213	0.69511	1.6024		0.64722	0.72491	0.63065		0.87613	0.78266
O15530;Q6A1A2;O15530-5;O15530-4;O15530-2	241;214;241;114;191	O15530	O15530	3-phosphoinositide-dependent protein kinase 1;Putative 3-phosphoinositide-dependent protein kinase 2	PDPK1;PDPK2	>sp|O15530|PDPK1_HUMAN 3-phosphoinositide-dependent protein kinase 1 OS=Homo sapiens GN=PDPK1 PE=1 SV=1;>sp|Q6A1A2|PDPK2_HUMAN Putative 3-phosphoinositide-dependent protein kinase 2 OS=Homo sapiens GN=PDPK2P PE=5 SV=1;>sp|O15530-5|PDPK1_HUMAN Isoform 5 of	1	111.101	7.01445e-54	246.42	202.92	1	S	TAKVLSPESKQARANSFVGTAQYVSPELLTE	X;X;X;X;X;X;X;X;X;X;X;X;X;X;X;Phospho (STY);X;X;X;X;X;X;X;X;X;X;X;X;X;X;X	XXXXXXXXXXPPPPPPPPPPPPPPPPPPPPP	ANS(1)FVGTAQYVSPELLTEK	ANS(111.1)FVGT(-111.1)AQY(-165.23)VS(-188.24)PELLT(-239.7)EK	3	3	-0.01931	0.86492	0.67605	0.39503	0.57462	0.63696	0.78761					0.63749	1.196	0.95335	0.91826			0.29245	0.41279
O15530;Q6A1A2;O15530-5;O15530-4;O15530-3	36;9;36;36;36	O15530	O15530	3-phosphoinositide-dependent protein kinase 1;Putative 3-phosphoinositide-dependent protein kinase 2	PDPK1;PDPK2	>sp|O15530|PDPK1_HUMAN 3-phosphoinositide-dependent protein kinase 1 OS=Homo sapiens GN=PDPK1 PE=1 SV=1;>sp|Q6A1A2|PDPK2_HUMAN Putative 3-phosphoinositide-dependent protein kinase 2 OS=Homo sapiens GN=PDPK2P PE=5 SV=1;>sp|O15530-5|PDPK1_HUMAN Isoform 5 of	0.680076	4.05535	2.07851e-06	123.61	94.482	1	S	CSCPSPSMVRTQTESSTPPGIPGGSRQGPAM	X;X;X;X;X;X;X;X;X;X;X;X;X;X;X;Phospho (STY);X;X;X;X;X;X;X;X;X;X;X;X;X;X;X	XXXXXXXXXXPPPPPPPPPPPPPPPPXXXXX	TQT(0.022)ES(0.031)S(0.68)T(0.267)PPGIPGGSR	T(-36.75)QT(-14.94)ES(-13.48)S(4.06)T(-4.06)PPGIPGGS(-36.95)R	6	2	-0.25253
O15541	84	O15541	O15541	RING finger protein 113A	RNF113A	>sp|O15541|R113A_HUMAN RING finger protein 113A OS=Homo sapiens GN=RNF113A PE=1 SV=1	0.998834	29.3232	3.06374e-07	100.53	83.104	2	S	KTRDSGKQKAAYGDLSSEEEEENEPESLGVV	X;X;X;X;X;X;X;X;X;X;X;Phospho (STY);X;X;X;Phospho (STY);Phospho (STY);X;X;X;X;X;X;X;X;X;X;X;X;X;X	XXXXXXXXXPPPPPPPPPPPPPPPPPPPPPP	AAY(0.002)GDLS(0.999)S(0.999)EEEEENEPESLGVVYK	AAY(-29.32)GDLS(29.32)S(29.32)EEEEENEPES(-66.4)LGVVY(-70.76)K	7	2	-0.62222	0.97456	0.76887	0.43621	0.76392	0.84071	0.88628	0.60073	0.7127	0.70869	0.64389	0.50796		0.7832	0.69601	0.79771	0.56168	0.46288	0.53037	0.48956	0.46433	0.43635	0.50676	0.57103	0.3923	0.53364	0.53497	0.66304
O15541	85	O15541	O15541	RING finger protein 113A	RNF113A	>sp|O15541|R113A_HUMAN RING finger protein 113A OS=Homo sapiens GN=RNF113A PE=1 SV=1	0.998834	29.3232	3.06374e-07	100.53	83.104	2	S	TRDSGKQKAAYGDLSSEEEEENEPESLGVVY	X;X;X;X;X;X;X;X;X;X;Phospho (STY);X;X;X;Phospho (STY);Phospho (STY);X;X;X;X;X;X;X;X;X;X;X;X;X;X;X	XXXXXXXXPPPPPPPPPPPPPPPPPPPPPPP	AAY(0.002)GDLS(0.999)S(0.999)EEEEENEPESLGVVYK	AAY(-29.32)GDLS(29.32)S(29.32)EEEEENEPES(-66.4)LGVVY(-70.76)K	8	2	-0.62222	0.97456	0.76887	0.43621	0.76392	0.84071	0.88628	0.60073	0.7127	0.70869	0.64389	0.50796		0.7832	0.69601	0.79771	0.56168	0.46288	0.53037	0.48956	0.46433	0.43635	0.50676	0.57103	0.3923	0.53364	0.53497	0.66304	0.47491
O15541	253	O15541	O15541	RING finger protein 113A	RNF113A	>sp|O15541|R113A_HUMAN RING finger protein 113A OS=Homo sapiens GN=RNF113A PE=1 SV=1	0.999997	55.6695	1.68976e-10	119.2	94.411	1	S	EGRYGVYEDENYEVGSDDEEIPFKCFICRQS	X;X;X;X;X;X;X;X;X;X;X;X;X;X;X;Phospho (STY);X;X;X;X;X;X;X;X;X;X;X;X;X;X;X	PPPPPPPPPPPPPPPPPPPPPPPPXXXXXXX	YGVYEDENYEVGS(1)DDEEIPFK	Y(-85.5)GVY(-85.5)EDENY(-55.67)EVGS(55.67)DDEEIPFK	13	2	-1.1615
O43143	15	O43143	O43143	Putative pre-mRNA-splicing factor ATP-dependent RNA helicase DHX15	DHX15	>sp|O43143|DHX15_HUMAN Pre-mRNA-splicing factor ATP-dependent RNA helicase DHX15 OS=Homo sapiens GN=DHX15 PE=1 SV=2	0.999998	57.3816	0.000838779	259.58	199.75	1	S	_MSKRHRLDLGEDYPSGKKRAGTDGKDRDRD	X;X;X;X;X;X;X;X;X;X;X;X;X;X;X;Phospho (STY);X;X;X;X;X;X;X;X;X;X;X;X;X;X;X	XXXXXXXPPPPPPPPPPPPXXXXXXXXXXXX	LDLGEDYPS(1)GKK	LDLGEDY(-57.38)PS(57.38)GKK	9	3	0.13867																0.63455		0.56888		0.33978
O43149;O43149-3	240;240	O43149	O43149	Zinc finger ZZ-type and EF-hand domain-containing protein 1	ZZEF1	>sp|O43149|ZZEF1_HUMAN Zinc finger ZZ-type and EF-hand domain-containing protein 1 OS=Homo sapiens GN=ZZEF1 PE=1 SV=6;>sp|O43149-3|ZZEF1_HUMAN Isoform 3 of Zinc finger ZZ-type and EF-hand domain-containing protein 1 OS=Homo sapiens GN=ZZEF1	1	65.7838	0.00100705	196.88	162.13	1	S	QLVQKEKESPGDLTRSPEMDKLKSVAKCYAY	X;X;X;X;X;X;X;X;X;X;X;X;X;X;X;Phospho (STY);X;X;Oxidation (M);X;X;X;X;X;X;X;X;X;X;X;X	XXXXXXXPPPPPPPPPPPPPPXXXXXXXXXX	ESPGDLTRS(1)PEMDK	ES(-136.32)PGDLT(-65.78)RS(65.78)PEMDK	9	3	-0.52543	0.78003	0.71118		0.78059	0.49709	0.63789	0.43333	0.62107	0.47278	0.74629	0.78305	0.44105	0.67876	0.71111	0.59343	0.52824	0.64324	0.58605	0.74413	0.49521	0.70662	0.59891	0.53852	0.62917	0.79009	1.1715	0.80291	0.67933
O43149	1509	O43149	O43149	Zinc finger ZZ-type and EF-hand domain-containing protein 1	ZZEF1	>sp|O43149|ZZEF1_HUMAN Zinc finger ZZ-type and EF-hand domain-containing protein 1 OS=Homo sapiens GN=ZZEF1 PE=1 SV=6	0.993348	23.1262	8.65911e-08	78.752	59.286	3	S	QPKLPSSSGLPAADVSPATAEEPLSPSTPTR	X;X;X;X;X;X;X;X;X;X;X;X;X;X;X;Phospho (STY);X;X;Phospho (STY);X;X;X;X;X;Phospho (STY);X;Phospho (STY);Phospho (STY);X;Phospho (STY);X	XXXPPPPPPPPPPPPPPPPPPPPPPPPPPPP	LPSSSGLPAADVS(0.993)PAT(0.687)AEEPLS(0.397)PS(0.359)T(0.359)PT(0.145)RRPPFT(0.058)R	LPS(-40.33)S(-40.33)S(-40.33)GLPAADVS(23.13)PAT(4.9)AEEPLS(1.02)PS(-1.02)T(-1.02)PT(-6.17)RRPPFT(-10.73)R	13	4	-0.38626					0.79928		0.69929									0.72012	0.70873			0.70013
O43149	1518	O43149	O43149	Zinc finger ZZ-type and EF-hand domain-containing protein 1	ZZEF1	>sp|O43149|ZZEF1_HUMAN Zinc finger ZZ-type and EF-hand domain-containing protein 1 OS=Homo sapiens GN=ZZEF1 PE=1 SV=6	0.943543	11.5187	8.65911e-08	78.752	59.286	3	S	LPAADVSPATAEEPLSPSTPTRRPPFTRGRL	X;X;X;X;X;X;Phospho (STY);X;X;Phospho (STY);X;X;X;X;X;Phospho (STY);X;Phospho (STY);Phospho (STY);X;Phospho (STY);X;X;X;X;X;Phospho (STY);X;X;X;X	PPPPPPPPPPPPPPPPPPPPPPPPPPPPXXX	LPSSSGLPAADVS(0.933)PAT(0.079)AEEPLS(0.944)PS(0.472)T(0.472)PT(0.084)RRPPFT(0.014)R	LPS(-34.63)S(-38.36)S(-38.36)GLPAADVS(11.52)PAT(-11.52)AEEPLS(11.52)PS(0)T(0)PT(-7.73)RRPPFT(-16.26)R	22	4	0.24855					0.79928		0.69929									0.72012	0.70873			0.70013
O43149	1520	O43149	O43149	Zinc finger ZZ-type and EF-hand domain-containing protein 1	ZZEF1	>sp|O43149|ZZEF1_HUMAN Zinc finger ZZ-type and EF-hand domain-containing protein 1 OS=Homo sapiens GN=ZZEF1 PE=1 SV=6	0.57648	0	8.65911e-08	78.752	59.286	3	S	AADVSPATAEEPLSPSTPTRRPPFTRGRLRL	X;X;X;X;Phospho (STY);X;X;X;X;X;X;X;X;Phospho (STY);X;Phospho (STY);Phospho (STY);X;X;X;X;X;X;X;X;X;X;X;X;X;X	PPPPPPPPPPPPPPPPPPPPPPPPPPXXXXX	LPS(0.001)S(0.001)S(0.001)GLPAADVS(0.984)PAT(0.104)AEEPLS(0.648)PS(0.576)T(0.576)PT(0.102)RRPPFT(0.007)R	LPS(-33.06)S(-33.06)S(-35.94)GLPAADVS(18.97)PAT(-9.96)AEEPLS(1.09)PS(0)T(0)PT(-9.01)RRPPFT(-22.36)R	24	4	0.96912
O43150;O43150-2	701;701	O43150	O43150	Arf-GAP with SH3 domain, ANK repeat and PH domain-containing protein 2	ASAP2	>sp|O43150|ASAP2_HUMAN Arf-GAP with SH3 domain, ANK repeat and PH domain-containing protein 2 OS=Homo sapiens GN=ASAP2 PE=1 SV=3;>sp|O43150-2|ASAP2_HUMAN Isoform 2 of Arf-GAP with SH3 domain, ANK repeat and PH domain-containing protein 2 OS=Homo sapiens GN	1	213.632	2.77902e-44	369.51	333.48	1	S	HVEYEWRLLHEDLDESDDDMDEKLQPSPNRR	X;X;X;X;X;X;X;X;X;X;X;X;X;X;X;Phospho (STY);X;X;X;Oxidation (M);X;X;X;X;X;X;X;X;X;X;X	XXXXXXXPPPPPPPPPPPPPPPPXXXXXXXX	LLHEDLDES(1)DDDMDEK	LLHEDLDES(213.63)DDDMDEK	9	3	0.67158	0.65221	0.68002	0.48629	0.87846	0.76413	0.93589	0.84078				1.3337	1.424	1.3845		0.71848	0.84062	0.71715	0.8075	0.8908	0.81434	0.78818	0.66218	0.8579	0.95421	0.82192	0.5774	0.86128	0.72142
O43159	53	O43159	O43159	Ribosomal RNA-processing protein 8	RRP8	>sp|O43159|RRP8_HUMAN Ribosomal RNA-processing protein 8 OS=Homo sapiens GN=RRP8 PE=1 SV=2	0.910783	11.4553	0.00014527	72.927	54.063	2	S	RQLLATLRALEAASLSQHPPSLCISDSEEEE	X;X;X;X;X;X;X;X;X;X;X;X;X;X;X;Phospho (STY);X;X;X;X;Phospho (STY);X;X;X;Phospho (STY);X;X;X;X;X;X	XXXXXXXXPPPPPPPPPPPPPPPPPPPPPPP	ALEAAS(0.044)LS(0.911)QHPPS(0.541)LCIS(0.071)DS(0.433)EEEEEER	ALEAAS(-12.11)LS(11.46)QHPPS(1.21)LCIS(-11.46)DS(-1.21)EEEEEER	8	3	-0.20239
O43159	58	O43159	O43159	Ribosomal RNA-processing protein 8	RRP8	>sp|O43159|RRP8_HUMAN Ribosomal RNA-processing protein 8 OS=Homo sapiens GN=RRP8 PE=1 SV=2	0.801338	6.76742	3.19352e-25	149.41	125.83	2	S	TLRALEAASLSQHPPSLCISDSEEEEEERKK	X;X;X;X;X;X;X;X;X;X;Phospho (STY);X;X;X;X;Phospho (STY);X;X;X;X;X;Phospho (STY);X;X;X;X;X;X;X;X;X	XXXPPPPPPPPPPPPPPPPPPPPPPPPPPPX	ALEAAS(0.002)LS(0.046)QHPPS(0.801)LCIS(0.252)DS(0.898)EEEEEER	ALEAAS(-27.61)LS(-14.67)QHPPS(6.77)LCIS(-6.77)DS(9.63)EEEEEER	13	3	0.83243																			1.1437		1.092				1.1856
O43159	62	O43159	O43159	Ribosomal RNA-processing protein 8	RRP8	>sp|O43159|RRP8_HUMAN Ribosomal RNA-processing protein 8 OS=Homo sapiens GN=RRP8 PE=1 SV=2	0.999967	44.869	1.74145e-18	134.56	110.04	2	S	LEAASLSQHPPSLCISDSEEEEEERKKKCPK	X;X;X;X;X;X;Phospho (STY);X;X;X;X;X;X;X;X;Phospho (STY);X;Phospho (STY);X;X;X;X;X;X;X;X;X;X;X;X;X	PPPPPPPPPPPPPPPPPPPPPPPPPPPXXXX	ALEAASLSQHPPSLCIS(1)DS(1)EEEEEER	ALEAAS(-76.33)LS(-69.53)QHPPS(-44.87)LCIS(44.87)DS(52)EEEEEER	17	3	0.18806	0.77582	1.0188	0.67762	1.2376	0.87356		0.85901						0.77528		1.1576	1.0531	0.99247	0.79017	0.75729	0.76108	0.59846	0.72841	0.775	0.72565	0.81792	0.54654	0.76304
O43159	64	O43159	O43159	Ribosomal RNA-processing protein 8	RRP8	>sp|O43159|RRP8_HUMAN Ribosomal RNA-processing protein 8 OS=Homo sapiens GN=RRP8 PE=1 SV=2	0.999994	52.3685	3.19352e-25	149.41	125.83	2	S	AASLSQHPPSLCISDSEEEEEERKKKCPKKA	X;X;X;X;X;X;X;X;X;Phospho (STY);X;X;X;Phospho (STY);X;Phospho (STY);X;X;X;X;X;X;X;X;X;X;X;X;X;X;X	PPPPPPPPPPPPPPPPPPPPPPPPPXXXXXX	ALEAASLSQHPPSLCIS(1)DS(1)EEEEEERK	ALEAAS(-60.52)LS(-59.67)QHPPS(-36.07)LCIS(36.07)DS(52.37)EEEEEERK	19	3	0.094287	0.98369	1.0723	0.64196	1.2083	0.88846		0.85901						0.77528		1.1576	1.0531	0.99247	0.79017	0.75817	0.76108	0.63734	0.72841	0.775	0.72565	0.88231	0.54654	0.76304
O43159	171	O43159	O43159	Ribosomal RNA-processing protein 8	RRP8	>sp|O43159|RRP8_HUMAN Ribosomal RNA-processing protein 8 OS=Homo sapiens GN=RRP8 PE=1 SV=2	0.999151	31.9074	1.19734e-07	110.33	94.219	2;3	S	PKAWKGSTTNDPPKQSPGSTSPKPPHTLSRK	X;X;X;X;X;X;X;X;X;X;X;X;X;X;X;Phospho (STY);X;X;Phospho (STY);Phospho (STY);Phospho (STY);X;X;X;X;X;X;X;X;X;X	XXXXXPPPPPPPPPPPPPPPPPPPPPPPPPX	GSTTNDPPKQS(0.999)PGS(0.124)T(0.439)S(0.439)PKPPHTLSR	GS(-62.67)T(-62.16)T(-61.65)NDPPKQS(31.91)PGS(-5.51)T(0)S(0)PKPPHT(-52.22)LS(-50.75)R	11	3	-0.053955	0.91491	1.2656	0.71422	1.4119	1.3945	1.0063	0.88455	1.1008	0.92953	1.1149	0.80554	0.61913	0.64012	0.61535	1.0337	0.98004	0.96281	0.99154	1.0766	0.86427	0.93992	0.92851	0.97582	0.90014	0.93295	0.23203	1.1713	0.32328
O43159	174	O43159	O43159	Ribosomal RNA-processing protein 8	RRP8	>sp|O43159|RRP8_HUMAN Ribosomal RNA-processing protein 8 OS=Homo sapiens GN=RRP8 PE=1 SV=2	0.979466	14.2384	1.17163e-06	85.849	85.849	2;3	S	WKGSTTNDPPKQSPGSTSPKPPHTLSRKQWR	X;X;X;X;X;X;X;X;X;X;X;X;Phospho (STY);X;X;Phospho (STY);Phospho (STY);Phospho (STY);X;X;X;X;X;X;X;X;X;X;X;X;X	XXPPPPPPPPPPPPPPPPPPPPPPPPPXXXX	GS(0.001)T(0.002)T(0.007)NDPPKQS(0.965)PGS(0.979)T(0.523)S(0.523)PKPPHTLSR	GS(-32.93)T(-28.06)T(-22.93)NDPPKQS(12.32)PGS(14.24)T(0)S(0)PKPPHT(-32.9)LS(-45.11)R	14	4	-0.28678			0.73737	0.99166	1.175						0.49791			0.66303	1.0337	0.95123	0.96869	1.0277	0.6821	0.80841	0.96154	0.71391	0.56101	0.61993	0.65382		0.80919
O43159	176	O43159	O43159	Ribosomal RNA-processing protein 8	RRP8	>sp|O43159|RRP8_HUMAN Ribosomal RNA-processing protein 8 OS=Homo sapiens GN=RRP8 PE=1 SV=2	0.981725	17.8851	1.19734e-07	139.66	139.66	1;2;3	S	GSTTNDPPKQSPGSTSPKPPHTLSRKQWRNR	X;X;X;X;X;X;X;X;X;X;Phospho (STY);X;X;Phospho (STY);Phospho (STY);Phospho (STY);X;X;X;X;X;X;X;X;X;X;X;X;X;X;X	PPPPPPPPPPPPPPPPPPPPPPPPPXXXXXX	QSPGS(0.002)T(0.016)S(0.982)PKPPHTLSR	QS(-70.39)PGS(-26.37)T(-17.89)S(17.89)PKPPHT(-44.74)LS(-64.36)R	7	3	-0.25067	0.91491	1.2656	0.82252	1.2731	1.175	1.0063	0.88455	1.046		1.067	0.49791	0.59306	0.6368	3.0495	1.0337	1.0617	0.96281	0.95668	1.0022	0.90293	0.91879	0.89599	0.97772	0.85458	1.0533		0.89447	0.32328
O43159	124	O43159	O43159	Ribosomal RNA-processing protein 8	RRP8	>sp|O43159|RRP8_HUMAN Ribosomal RNA-processing protein 8 OS=Homo sapiens GN=RRP8 PE=1 SV=2	0.887969	8.9906	3.68269e-06	123.4	74.099	1	S	EVERKKKCHKQALVGSDSAEDEKRKRKCQKH	X;X;X;X;X;X;X;X;X;X;X;X;X;X;X;Phospho (STY);X;X;X;X;X;X;X;X;X;X;X;X;X;X;X	XXXXXXXXXXPPPPPPPPPPPPPXXXXXXXX	QALVGS(0.888)DS(0.112)AEDEK	QALVGS(8.99)DS(-8.99)AEDEK	6	2	0.027191													0.67722	0.7055
O43159	126	O43159	O43159	Ribosomal RNA-processing protein 8	RRP8	>sp|O43159|RRP8_HUMAN Ribosomal RNA-processing protein 8 OS=Homo sapiens GN=RRP8 PE=1 SV=2	0.991422	20.6285	5.8433e-12	160.09	114.09	1	S	ERKKKCHKQALVGSDSAEDEKRKRKCQKHAP	X;X;X;X;X;X;X;X;X;X;X;X;X;X;X;Phospho (STY);X;X;X;X;X;X;X;X;X;X;X;X;X;X;X	XXXXXXXXPPPPPPPPPPPPPXXXXXXXXXX	QALVGS(0.009)DS(0.991)AEDEK	QALVGS(-20.63)DS(20.63)AEDEK	8	2	0.012446	0.93733	0.75736	0.49503	0.78971					0.89602	0.80028	0.75114
O43159	104	O43159	O43159	Ribosomal RNA-processing protein 8	RRP8	>sp|O43159|RRP8_HUMAN Ribosomal RNA-processing protein 8 OS=Homo sapiens GN=RRP8 PE=1 SV=2	1	77.0996	5.19565e-07	185.2	185.2	2	S	GKKGKKKCQKQGPPCSDSEEEVERKKKCHKQ	X;X;X;X;X;X;X;X;X;X;X;X;X;X;X;Phospho (STY);X;Phospho (STY);X;X;X;X;X;X;X;X;X;X;X;X;X	XXXXXXXXXXPPPPPPPPPPPPPPPXXXXXX	QGPPCS(1)DS(1)EEEVERK	QGPPCS(77.1)DS(77.1)EEEVERK	6	2	-0.10818	0.83739	0.65414	0.35253	0.73353	0.65659	0.7273	0.6036	0.7044	0.60498	0.6068	0.6554	0.53745	0.66831	0.72644		0.90239	0.587		0.7951	0.83047	0.62866	0.66419	0.57411		0.84055		0.66269
O43159	106	O43159	O43159	Ribosomal RNA-processing protein 8	RRP8	>sp|O43159|RRP8_HUMAN Ribosomal RNA-processing protein 8 OS=Homo sapiens GN=RRP8 PE=1 SV=2	1	77.0996	5.19565e-07	185.2	185.2	2	S	KGKKKCQKQGPPCSDSEEEVERKKKCHKQAL	X;X;X;X;X;X;X;X;X;X;X;X;X;Phospho (STY);X;Phospho (STY);X;X;X;X;X;X;X;X;X;X;X;X;X;X;X	XXXXXXXXPPPPPPPPPPPPPPPXXXXXXXX	QGPPCS(1)DS(1)EEEVERK	QGPPCS(77.1)DS(77.1)EEEVERK	8	2	-0.10818	0.83739	0.65414	0.35253	0.73353	0.65659	0.7273	0.6036	0.7044	0.60498	0.6068	0.6554	0.53745	0.66831	0.72644		0.90239	0.587		0.7951	0.83047	0.62866	0.66419	0.57411		0.84055		0.66269
O43159	223	O43159	O43159	Ribosomal RNA-processing protein 8	RRP8	>sp|O43159|RRP8_HUMAN Ribosomal RNA-processing protein 8 OS=Homo sapiens GN=RRP8 PE=1 SV=2	1	78.9857	0.000754078	217.48	126.12	1	S	PDQAPAEAPTEKTEVSPVPRTDSHEARAGAL	X;X;X;X;X;X;X;X;X;X;X;X;X;X;X;Phospho (STY);X;X;X;X;X;X;X;X;X;X;X;X;X;X;X	XXXXXXXXXXXXPPPPPPPPPPPPPPPXXXX	TEVS(1)PVPR	T(-78.99)EVS(78.99)PVPR	4	2	0.20506	0.86907		0.35632	0.58691	0.52626	0.77387	0.67074	0.7071	0.70091	0.77053	0.74236	0.56186	0.60014	0.49715	0.6306		0.63742		0.69783	0.6891	0.52316	0.69394		0.54886	0.73213		0.73828	0.31214
O43164;O43164-2	309;309	O43164	O43164	E3 ubiquitin-protein ligase Praja-2	PJA2	>sp|O43164|PJA2_HUMAN E3 ubiquitin-protein ligase Praja-2 OS=Homo sapiens GN=PJA2 PE=1 SV=4;>sp|O43164-2|PJA2_HUMAN Isoform 2 of E3 ubiquitin-protein ligase Praja-2 OS=Homo sapiens GN=PJA2	0.999917	40.7951	0.00117893	138.25	61.123	1	S	CSEQNTNDREKNHGSSPEQVVRPKVRKLISS	X;X;X;X;X;X;X;X;X;X;X;X;X;X;X;Phospho (STY);X;X;X;X;X;X;X;X;X;X;X;X;X;X;X	XXXXXXXXXXXPPPPPPPPPPPPPXXXXXXX	NHGSS(1)PEQVVRPK	NHGS(-40.8)S(40.8)PEQVVRPK	5	3	-0.74356																	0.42021				0.46508	0.34931	0.48191				0.41556
O43164;O43164-2	282;282	O43164	O43164	E3 ubiquitin-protein ligase Praja-2	PJA2	>sp|O43164|PJA2_HUMAN E3 ubiquitin-protein ligase Praja-2 OS=Homo sapiens GN=PJA2 PE=1 SV=4;>sp|O43164-2|PJA2_HUMAN Isoform 2 of E3 ubiquitin-protein ligase Praja-2 OS=Homo sapiens GN=PJA2	0.746746	4.70057	0.00282324	45.423	29.756	1	S	TKQQNNTSQERQTEHSPEDAACGPGHICSEQ	X;X;X;X;X;X;X;X;X;X;X;X;X;X;X;Phospho (STY);X;X;X;X;X;X;X;X;X;X;X;X;X;X;X	XXXXXXXXXXXPPPPPPPPPPPPPPPPPPPP	QT(0.253)EHS(0.747)PEDAACGPGHICSEQNTNDREK	QT(-4.7)EHS(4.7)PEDAACGPGHICS(-35.35)EQNT(-42.79)NDREK	5	4	-0.055731																			0.76998
O43166;O43166-3;O43166-2	1565;1544;1544	O43166	O43166	Signal-induced proliferation-associated 1-like protein 1	SIPA1L1	>sp|O43166|SI1L1_HUMAN Signal-induced proliferation-associated 1-like protein 1 OS=Homo sapiens GN=SIPA1L1 PE=1 SV=4;>sp|O43166-3|SI1L1_HUMAN Isoform 3 of Signal-induced proliferation-associated 1-like protein 1 OS=Homo sapiens GN=SIPA1L1;>sp|O43166-2|SI1L	0.978986	16.7745	0.00183621	113.38	84.308	3	S	PTPESQKSFKFHALSSPQSPFPSTPTSRRAL	X;X;X;X;X;X;X;X;X;X;X;X;X;X;X;Phospho (STY);X;X;Phospho (STY);X;X;X;X;Phospho (STY);X;X;Phospho (STY);X;X;X;X	XXXXXXXXXXPPPPPPPPPPPPPPPPPPXXX	FHALS(0.022)S(0.979)PQS(0.999)PFPS(0.009)T(0.824)PT(0.083)S(0.083)R	FHALS(-16.77)S(16.77)PQS(32.69)PFPS(-19.54)T(9.95)PT(-9.95)S(-9.95)R	6	3	-0.043627															1.0376				0.48775	0.48753	0.33298	0.46832	0.63029	0.49582	0.49733
O43166;O43166-3;O43166-2	1568;1547;1547	O43166	O43166	Signal-induced proliferation-associated 1-like protein 1	SIPA1L1	>sp|O43166|SI1L1_HUMAN Signal-induced proliferation-associated 1-like protein 1 OS=Homo sapiens GN=SIPA1L1 PE=1 SV=4;>sp|O43166-3|SI1L1_HUMAN Isoform 3 of Signal-induced proliferation-associated 1-like protein 1 OS=Homo sapiens GN=SIPA1L1;>sp|O43166-2|SI1L	0.999393	32.6887	0.00183621	113.38	84.308	3	S	ESQKSFKFHALSSPQSPFPSTPTSRRALHRT	X;X;X;X;X;X;X;X;X;X;X;X;Phospho (STY);X;X;Phospho (STY);X;X;X;X;Phospho (STY);X;X;Phospho (STY);X;X;X;X;X;X;X	XXXXXXXPPPPPPPPPPPPPPPPPPXXXXXX	FHALS(0.022)S(0.979)PQS(0.999)PFPS(0.009)T(0.824)PT(0.083)S(0.083)R	FHALS(-16.77)S(16.77)PQS(32.69)PFPS(-19.54)T(9.95)PT(-9.95)S(-9.95)R	9	3	-0.043627															1.0376				0.48775	0.48753	0.33298	0.46832	0.63029	0.49582	0.49733
O43169	19	O43169	O43169	Cytochrome b5 type B	CYB5B	>sp|O43169|CYB5B_HUMAN Cytochrome b5 type B OS=Homo sapiens GN=CYB5B PE=1 SV=2	0.986706	21.9187	0.000417342	220.78	151.7	1	S	AEASGSDGKGQEVETSVTYYRLEEVAKRNSL	X;X;X;X;X;X;X;X;X;X;X;X;X;X;X;Phospho (STY);X;X;X;X;X;X;X;X;X;X;X;X;X;X;X	XXXXXXXXXPPPPPPPPPPPPPPPPPPXXXX	GQEVET(0.006)S(0.987)VT(0.006)Y(0.001)YRLEEVAK	GQEVET(-21.92)S(21.92)VT(-21.92)Y(-32.5)Y(-42.81)RLEEVAK	7	3	0.27557
O43175	326	O43175	O43175	D-3-phosphoglycerate dehydrogenase	PHGDH	>sp|O43175|SERA_HUMAN D-3-phosphoglycerate dehydrogenase OS=Homo sapiens GN=PHGDH PE=1 SV=4	1	92.3522	3.58324e-20	332.96	290.57	1	S	SLTGVVNAQALTSAFSPHTKPWIGLAEALGT	X;X;X;X;X;X;X;X;X;X;X;X;X;X;X;Phospho (STY);X;X;X;X;X;X;X;X;X;X;X;X;X;X;X	PPPPPPPPPPPPPPPPPPPPXXXXXXXXXXX	SLTGVVNAQALTSAFS(1)PHTK	S(-298.54)LT(-294.16)GVVNAQALT(-114.08)S(-92.35)AFS(92.35)PHT(-116.77)K	16	3	0.26052	0.83903	0.56202	0.52128	0.5926	0.88533	0.89807		0.93102	1.0757	0.81042	0.8621	0.7366	1.0343	0.83508	1.0957			0.86129
O43189;O43189-2	20;20	O43189	O43189	PHD finger protein 1	PHF1	>sp|O43189|PHF1_HUMAN PHD finger protein 1 OS=Homo sapiens GN=PHF1 PE=1 SV=3;>sp|O43189-2|PHF1_HUMAN Isoform 1 of PHD finger protein 1 OS=Homo sapiens GN=PHF1	0.999254	31.2918	0.000109556	117.03	94.491	1	S	PRLSRSGASSLWDPASPAPTSGPRPRLWEGQ	X;X;X;X;X;X;X;X;X;X;X;X;X;X;X;Phospho (STY);X;X;X;X;X;X;X;X;X;X;X;X;X;X;X	XXXXXPPPPPPPPPPPPPPPPPPPPPXXXXX	SGASSLWDPAS(0.999)PAPT(0.001)SGPRPR	S(-84.88)GAS(-84.88)S(-72.59)LWDPAS(31.29)PAPT(-31.29)S(-53.8)GPRPR	11	3	0.18138	1.0419		0.58499	1.0072	0.50544	0.78415									0.70271	0.72126	0.83131	0.56614	0.72555	0.6682		0.49363		0.43982		0.31468
O43237;O43237-2	381;304	O43237	O43237	Cytoplasmic dynein 1 light intermediate chain 2	DYNC1LI2	>sp|O43237|DC1L2_HUMAN Cytoplasmic dynein 1 light intermediate chain 2 OS=Homo sapiens GN=DYNC1LI2 PE=1 SV=1;>sp|O43237-2|DC1L2_HUMAN Isoform 2 of Cytoplasmic dynein 1 light intermediate chain 2 OS=Homo sapiens GN=DYNC1LI2	0.668796	4.50866	0.00290899	61.177	41.89	3	S	QQSLLAKQPATPTRASESPARGPSGSPRTQG	X;X;X;X;X;X;X;X;X;X;Phospho (STY);X;X;X;X;Phospho (STY);X;Phospho (STY);X;X;X;X;X;Phospho (STY);X;Phospho (STY);X;X;X;X;X	XXXXXXXPPPPPPPPPPPPPPPPPPPPPXXX	QPAT(0.108)PT(0.261)RAS(0.669)ES(0.948)PARGPS(0.507)GS(0.507)PR	QPAT(-8.94)PT(-4.51)RAS(4.51)ES(16.18)PARGPS(0)GS(0)PR	9	3	-0.080053	1.0266	0.62968		1.0704		0.9004
O43237;O43237-2	383;306	O43237	O43237	Cytoplasmic dynein 1 light intermediate chain 2	DYNC1LI2	>sp|O43237|DC1L2_HUMAN Cytoplasmic dynein 1 light intermediate chain 2 OS=Homo sapiens GN=DYNC1LI2 PE=1 SV=1;>sp|O43237-2|DC1L2_HUMAN Isoform 2 of Cytoplasmic dynein 1 light intermediate chain 2 OS=Homo sapiens GN=DYNC1LI2	0.982711	18.4301	0.00290899	76.446	60.431	2;3	S	SLLAKQPATPTRASESPARGPSGSPRTQGRG	X;X;X;X;X;X;X;X;Phospho (STY);X;X;X;X;Phospho (STY);X;Phospho (STY);X;X;X;X;X;Phospho (STY);X;Phospho (STY);X;X;X;X;X;X;X	XXXXXPPPPPPPPPPPPPPPPPPPPPXXXXX	QPAT(0.987)PT(0.01)RAS(0.02)ES(0.983)PARGPS(0.159)GS(0.841)PR	QPAT(20.65)PT(-20.65)RAS(-18.43)ES(18.43)PARGPS(-7.29)GS(7.29)PR	11	2	0.63168
O43237;O43237-2	389;312	O43237	O43237	Cytoplasmic dynein 1 light intermediate chain 2	DYNC1LI2	>sp|O43237|DC1L2_HUMAN Cytoplasmic dynein 1 light intermediate chain 2 OS=Homo sapiens GN=DYNC1LI2 PE=1 SV=1;>sp|O43237-2|DC1L2_HUMAN Isoform 2 of Cytoplasmic dynein 1 light intermediate chain 2 OS=Homo sapiens GN=DYNC1LI2	0.763171	4.9672	0.00290899	65.817	40.915	2;3	S	PATPTRASESPARGPSGSPRTQGRGGPASVP	X;X;Phospho (STY);X;Phospho (STY);X;X;Phospho (STY);X;Phospho (STY);X;X;X;X;X;Phospho (STY);X;X;X;X;X;X;X;X;X;X;X;X;Phospho (STY);X;X	PPPPPPPPPPPPPPPPPPPPXXXXXXXXXXX	AS(0.202)ES(0.797)PARGPS(0.763)GS(0.237)PR	AS(-5.82)ES(5.82)PARGPS(4.97)GS(-4.97)PR	10	2	-0.85496	1.0266	0.62968		1.0704		0.9004
O43237;O43237-2	391;314	O43237	O43237	Cytoplasmic dynein 1 light intermediate chain 2	DYNC1LI2	>sp|O43237|DC1L2_HUMAN Cytoplasmic dynein 1 light intermediate chain 2 OS=Homo sapiens GN=DYNC1LI2 PE=1 SV=1;>sp|O43237-2|DC1L2_HUMAN Isoform 2 of Cytoplasmic dynein 1 light intermediate chain 2 OS=Homo sapiens GN=DYNC1LI2	0.893778	9.29314	0.00290899	76.446	60.431	2;3	S	TPTRASESPARGPSGSPRTQGRGGPASVPSS	Phospho (STY);X;X;X;X;Phospho (STY);X;Phospho (STY);X;X;X;X;X;X;X;Phospho (STY);X;X;X;X;X;X;X;X;X;X;Phospho (STY);X;X;Phospho (STY);Phospho (STY)	PPPPPPPPPPPPPPPPPPXXXXXXXXXXXXX	QPAT(0.993)PT(0.008)RAS(0.351)ES(0.648)PARGPS(0.107)GS(0.894)PR	QPAT(21.54)PT(-21.54)RAS(-2.67)ES(2.67)PARGPS(-9.29)GS(9.29)PR	19	2	0.4676
O43237;O43237-2	194;117	O43237	O43237	Cytoplasmic dynein 1 light intermediate chain 2	DYNC1LI2	>sp|O43237|DC1L2_HUMAN Cytoplasmic dynein 1 light intermediate chain 2 OS=Homo sapiens GN=DYNC1LI2 PE=1 SV=1;>sp|O43237-2|DC1L2_HUMAN Isoform 2 of Cytoplasmic dynein 1 light intermediate chain 2 OS=Homo sapiens GN=DYNC1LI2	1	78.5227	2.14084e-27	166.93	122.17	1	S	KDFQDYMEPEEGCQGSPQRRGPLTSGSDEEN	X;X;X;X;X;X;Oxidation (M);X;X;X;X;X;X;X;X;Phospho (STY);X;X;X;X;X;X;X;X;X;X;X;X;X;X;X	XPPPPPPPPPPPPPPPPPPPXXXXXXXXXXX	DFQDYMEPEEGCQGS(1)PQR	DFQDY(-78.52)MEPEEGCQGS(78.52)PQR	15	3	-0.25912	0.89495	0.61282		0.59076	0.48456	0.81903	0.60421	0.63399	0.76515	0.67767	0.76015	0.75023	0.64384	0.84073	0.78408	0.76657	0.71676	0.65972	0.71414	0.6889	0.63841	0.76686	0.69628	0.6716	0.76684	0.57443	0.71367	0.50779
O43237;O43237-2	405;328	O43237	O43237	Cytoplasmic dynein 1 light intermediate chain 2	DYNC1LI2	>sp|O43237|DC1L2_HUMAN Cytoplasmic dynein 1 light intermediate chain 2 OS=Homo sapiens GN=DYNC1LI2 PE=1 SV=1;>sp|O43237-2|DC1L2_HUMAN Isoform 2 of Cytoplasmic dynein 1 light intermediate chain 2 OS=Homo sapiens GN=DYNC1LI2	0.906837	11.375	1.46297e-08	132.14	63.385	1;2	S	GSPRTQGRGGPASVPSSSPGTSVKKPDPNIK	X;Phospho (STY);X;X;X;X;X;X;X;X;X;X;X;X;X;Phospho (STY);X;Phospho (STY);X;X;Phospho (STY);Phospho (STY);X;X;X;X;X;X;X;X;X	XXXXXXXXPPPPPPPPPPPPPPPPPPPPPPP	GGPASVPS(0.907)S(0.019)S(0.066)PGT(0.004)S(0.004)VK	GGPAS(-62.32)VPS(11.38)S(-16.86)S(-11.38)PGT(-23.33)S(-23.33)VK	8	2	0.35439						0.84686	0.66573	0.81757	0.66157		0.39762	0.12906	0.084295		1.0149	0.52809	0.32968	0.71723
O43237;O43237-2	406;329	O43237	O43237	Cytoplasmic dynein 1 light intermediate chain 2	DYNC1LI2	>sp|O43237|DC1L2_HUMAN Cytoplasmic dynein 1 light intermediate chain 2 OS=Homo sapiens GN=DYNC1LI2 PE=1 SV=1;>sp|O43237-2|DC1L2_HUMAN Isoform 2 of Cytoplasmic dynein 1 light intermediate chain 2 OS=Homo sapiens GN=DYNC1LI2	0.771483	6.30476	1.38266e-09	141.07	116.59	1;2	S	SPRTQGRGGPASVPSSSPGTSVKKPDPNIKN	Phospho (STY);X;X;X;X;X;X;X;X;X;X;X;X;X;X;Phospho (STY);Phospho (STY);X;X;X;X;X;X;X;X;X;X;X;X;X;X	XXXXXXXPPPPPPPPPPPPPPPPXXXXXXXX	GGPASVPS(0.043)S(0.771)S(0.181)PGT(0.002)S(0.003)VK	GGPAS(-62.86)VPS(-12.5)S(6.3)S(-6.3)PGT(-26.53)S(-24.52)VK	9	2	-0.19929
O43237;O43237-2	407;330	O43237	O43237	Cytoplasmic dynein 1 light intermediate chain 2	DYNC1LI2	>sp|O43237|DC1L2_HUMAN Cytoplasmic dynein 1 light intermediate chain 2 OS=Homo sapiens GN=DYNC1LI2 PE=1 SV=1;>sp|O43237-2|DC1L2_HUMAN Isoform 2 of Cytoplasmic dynein 1 light intermediate chain 2 OS=Homo sapiens GN=DYNC1LI2	0.975509	17.4338	1.38266e-09	141.07	116.59	1;2	S	PRTQGRGGPASVPSSSPGTSVKKPDPNIKNN	X;X;X;X;X;X;X;X;X;X;X;X;X;Phospho (STY);Phospho (STY);Phospho (STY);X;X;X;X;X;X;X;X;X;X;X;X;X;X;X	XXPPPPPPPPPPPPPPPPPPPPPPPPPPPXX	TQGRGGPASVPSS(0.018)S(0.976)PGT(0.006)SVK	T(-104.52)QGRGGPAS(-56.62)VPS(-33.88)S(-17.43)S(17.43)PGT(-21.8)S(-46.06)VK	14	3	-0.092789			0.4141
O43237;O43237-2	411;334	O43237	O43237	Cytoplasmic dynein 1 light intermediate chain 2	DYNC1LI2	>sp|O43237|DC1L2_HUMAN Cytoplasmic dynein 1 light intermediate chain 2 OS=Homo sapiens GN=DYNC1LI2 PE=1 SV=1;>sp|O43237-2|DC1L2_HUMAN Isoform 2 of Cytoplasmic dynein 1 light intermediate chain 2 OS=Homo sapiens GN=DYNC1LI2	0.912067	13.8167	0.000134893	98.062	98.062	1;2	S	GRGGPASVPSSSPGTSVKKPDPNIKNNAASE	X;X;X;X;X;X;X;X;X;Phospho (STY);X;X;X;X;X;Phospho (STY);X;X;X;X;X;X;X;X;X;X;X;X;X;X;X	XXPPPPPPPPPPPPPPPPPPPPPPPXXXXXX	GGPAS(0.001)VPS(0.724)S(0.085)S(0.085)PGT(0.194)S(0.912)VKKPDPNIK	GGPAS(-31.06)VPS(6)S(-10.86)S(-10.86)PGT(-6)S(13.82)VKKPDPNIK	14	3	-0.10449															1.0149	0.52809	0.32968					0.78422
O43237;O43237-2	443;366	O43237	O43237	Cytoplasmic dynein 1 light intermediate chain 2	DYNC1LI2	>sp|O43237|DC1L2_HUMAN Cytoplasmic dynein 1 light intermediate chain 2 OS=Homo sapiens GN=DYNC1LI2 PE=1 SV=1;>sp|O43237-2|DC1L2_HUMAN Isoform 2 of Cytoplasmic dynein 1 light intermediate chain 2 OS=Homo sapiens GN=DYNC1LI2	1	76.0729	1.67733e-42	322.7	286.29	1;2	S	VLASFFNSLLSKKTGSPGSPGAGGVQSTAKK	X;X;X;X;X;X;X;X;X;X;X;X;X;Phospho (STY);X;Phospho (STY);X;X;Phospho (STY);X;X;X;X;X;X;X;Phospho (STY);X;X;X;X	XXXXXXXXXXXXPPPPPPPPPPPPPPPPPPP	KTGS(1)PGS(1)PGAGGVQSTAK	KT(-76.07)GS(76.07)PGS(142.39)PGAGGVQS(-200.61)T(-233.92)AK	4	3	0.28498	0.90762	0.58608	0.34989	0.68261	0.55986	0.74475	0.4498	0.87952	0.30963	0.31274	0.65855				0.62586	0.52053	0.43931	0.45435	0.4559	0.43751	0.42321	0.40691	0.43899	0.36281	0.44447	0.16085	0.087625
O43237;O43237-2	446;369	O43237	O43237	Cytoplasmic dynein 1 light intermediate chain 2	DYNC1LI2	>sp|O43237|DC1L2_HUMAN Cytoplasmic dynein 1 light intermediate chain 2 OS=Homo sapiens GN=DYNC1LI2 PE=1 SV=1;>sp|O43237-2|DC1L2_HUMAN Isoform 2 of Cytoplasmic dynein 1 light intermediate chain 2 OS=Homo sapiens GN=DYNC1LI2	1	79.214	1.67733e-42	322.7	286.29	1;2	S	SFFNSLLSKKTGSPGSPGAGGVQSTAKKSGQ	X;X;X;X;X;X;X;X;X;X;Phospho (STY);X;Phospho (STY);X;X;Phospho (STY);X;X;X;X;X;X;X;Phospho (STY);X;X;X;X;X;X;X	XXXXXXXXXPPPPPPPPPPPPPPPPPPPXXX	T(0.005)GS(0.995)PGS(1)PGAGGVQSTAK	T(-22.95)GS(22.95)PGS(79.21)PGAGGVQS(-94.04)T(-94.69)AK	6	2	0.11079	0.90762	0.56622	0.34212	0.70891	0.72063	0.595	0.72387	0.50506	1.1024	1.0324	0.088345				0.64687	0.44781	0.43931	0.44714	0.41713	0.40885	0.42166	0.40691	0.41519	0.35806	0.85993	0.16085	0.087625
O43272;O43272-2;O43272-1	226;118;142	O43272	O43272	Proline dehydrogenase 1, mitochondrial	PRODH	>sp|O43272|PROD_HUMAN Proline dehydrogenase 1, mitochondrial OS=Homo sapiens GN=PRODH PE=1 SV=3;>sp|O43272-2|PROD_HUMAN Isoform 2 of Proline dehydrogenase 1, mitochondrial OS=Homo sapiens GN=PRODH;>sp|O43272-1|PROD_HUMAN Isoform 3 of Proline dehydrogenase	1	61.4189	0.00485623	67.252	13.304	1	S	HMETFLRCIEASGRVSDDGFIAIKLTALGRP	X;X;X;X;X;X;X;X;X;X;X;X;X;X;X;Phospho (STY);X;X;X;X;X;X;X;X;X;X;X;X;X;X;X	XXXXXXXXXXXXXXPPPPPPPPPPXXXXXXX	VS(1)DDGFIAIK	VS(61.42)DDGFIAIK	2	2	-0.5994
O43290	437	O43290	O43290	U4/U6.U5 tri-snRNP-associated protein 1	SART1	>sp|O43290|SNUT1_HUMAN U4/U6.U5 tri-snRNP-associated protein 1 OS=Homo sapiens GN=SART1 PE=1 SV=1	0.999953	43.2916	0.000187173	78.917	56.968	1	S	DLLPLGDQTQDGDFGSRLRGRGRRRVSEVEE	X;X;X;X;X;X;X;X;X;X;X;X;X;X;X;Phospho (STY);X;X;X;X;X;X;X;X;X;X;Phospho (STY);X;X;X;X	PPPPPPPPPPPPPPPPPPPXXXXXXXXXXXX	ADDLLPLGDQTQDGDFGS(1)RLR	ADDLLPLGDQT(-43.29)QDGDFGS(43.29)RLR	18	3	0.25578	1.1109																0.31612
O43290	521	O43290	O43290	U4/U6.U5 tri-snRNP-associated protein 1	SART1	>sp|O43290|SNUT1_HUMAN U4/U6.U5 tri-snRNP-associated protein 1 OS=Homo sapiens GN=SART1 PE=1 SV=1	1	121.955	0.000880982	269.33	122.37	1	S	GRRLRQLQQLQQLRDSGEKVVEIVKKLESRQ	X;X;X;X;X;X;X;X;X;X;X;X;X;X;X;Phospho (STY);X;X;X;X;X;X;X;X;X;X;X;X;X;X;X	XXXXXPPPPPPPPPPPPPPXXXXXXXXXXXX	QLQQLQQLRDS(1)GEK	QLQQLQQLRDS(121.95)GEK	11	3	-0.14047		0.59519		0.82733	0.56371		0.79207	0.81467	0.58473	0.54141						0.94866	0.83059	0.79628				0.72634
O43290	448	O43290	O43290	U4/U6.U5 tri-snRNP-associated protein 1	SART1	>sp|O43290|SNUT1_HUMAN U4/U6.U5 tri-snRNP-associated protein 1 OS=Homo sapiens GN=SART1 PE=1 SV=1	1	66.9887	0.000230657	79.467	44.376	1	S	GDFGSRLRGRGRRRVSEVEEEKEPVPQPLPS	X;X;X;X;Phospho (STY);X;X;X;X;X;X;X;X;X;X;Phospho (STY);X;X;X;X;X;X;X;X;X;X;X;X;X;X;X	XXXXXXXXXXXXXPPPPPPPPPPPPPPPPPP	RVS(1)EVEEEK	RVS(66.99)EVEEEK	3	2	-0.60338																1.326	0.8449	1.161	0.77282	1.8801	1.3255	0.86398
O43290	591	O43290	O43290	U4/U6.U5 tri-snRNP-associated protein 1	SART1	>sp|O43290|SNUT1_HUMAN U4/U6.U5 tri-snRNP-associated protein 1 OS=Homo sapiens GN=SART1 PE=1 SV=1	0.828023	3.81654	2.58818e-05	75.539	58.393	2	S	EEQEELMDFERDEERSANGGSESDGEENIGW	X;X;X;X;X;X;X;X;X;X;X;X;X;X;X;Phospho (STY);X;X;X;X;Phospho (STY);X;Phospho (STY);X;X;X;X;X;X;X;X	XXXXXXXXXXXXXXXPPPPPPPPPPPPPPPP	S(0.828)ANGGS(0.586)ES(0.586)DGEENIGWSTVNLDEEK	S(3.82)ANGGS(0)ES(0)DGEENIGWS(-45.18)T(-44.58)VNLDEEK	1	3	0.26094															0.82529	0.94924	0.77856			0.97592			0.92121		0.97175		1.014
O43290	596	O43290	O43290	U4/U6.U5 tri-snRNP-associated protein 1	SART1	>sp|O43290|SNUT1_HUMAN U4/U6.U5 tri-snRNP-associated protein 1 OS=Homo sapiens GN=SART1 PE=1 SV=1	0.879848	6.9179	2.58818e-05	75.539	58.393	2	S	LMDFERDEERSANGGSESDGEENIGWSTVNL	X;X;X;X;X;X;X;X;X;X;Phospho (STY);X;X;X;X;Phospho (STY);X;Phospho (STY);X;X;X;X;X;X;X;X;X;X;X;X;X	XXXXXXXXXXPPPPPPPPPPPPPPPPPPPPP	S(0.711)ANGGS(0.88)ES(0.409)DGEENIGWSTVNLDEEK	S(3.1)ANGGS(6.92)ES(-3.1)DGEENIGWS(-47.1)T(-47.1)VNLDEEK	6	3	-0.82159															0.82529	0.94924	0.77856			0.97592		1.1393	0.92121	0.92595			1.014
O43290	598	O43290	O43290	U4/U6.U5 tri-snRNP-associated protein 1	SART1	>sp|O43290|SNUT1_HUMAN U4/U6.U5 tri-snRNP-associated protein 1 OS=Homo sapiens GN=SART1 PE=1 SV=1	0.965176	12.9859	0.000121614	67.136	45.97	2	S	DFERDEERSANGGSESDGEENIGWSTVNLDE	X;X;X;X;X;X;X;X;Phospho (STY);X;X;X;X;Phospho (STY);X;Phospho (STY);X;X;X;X;X;X;X;X;X;X;X;X;X;X;X	XXXXXXXXPPPPPPPPPPPPPPPPPPPPPPP	S(0.309)ANGGS(0.726)ES(0.965)DGEENIGWSTVNLDEEK	S(-4.02)ANGGS(4.02)ES(12.99)DGEENIGWS(-45.91)T(-47.66)VNLDEEK	8	3	0.27006															0.82529	0.94924	0.77856			0.97592		1.1393	0.92121	0.92595	0.97175		1.014
O43301	19	O43301	O43301	Heat shock 70 kDa protein 12A	HSPA12A	>sp|O43301|HS12A_HUMAN Heat shock 70 kDa protein 12A OS=Homo sapiens GN=HSPA12A PE=1 SV=2	0.600045	6.19972	0.00156631	87.647	42.107	1	S	KEAGGSDGPRETAPTSAYSSPARSLGDTGIT	X;X;X;X;X;X;X;X;X;X;X;X;X;X;X;Phospho (STY);X;X;X;X;X;X;X;X;X;X;X;X;X;X;X	XXXXXXXXXXPPPPPPPPPPPPPXXXXXXXX	ETAPT(0.144)S(0.6)AY(0.003)S(0.141)S(0.112)PAR	ET(-51.3)APT(-6.2)S(6.2)AY(-22.6)S(-6.3)S(-7.29)PAR	6	2	0.39615
O43301	22	O43301	O43301	Heat shock 70 kDa protein 12A	HSPA12A	>sp|O43301|HS12A_HUMAN Heat shock 70 kDa protein 12A OS=Homo sapiens GN=HSPA12A PE=1 SV=2	0.761087	6.31639	1.66087e-06	133.15	81.712	1	S	GGSDGPRETAPTSAYSSPARSLGDTGITPLS	X;X;X;X;X;X;X;X;X;X;X;X;X;X;X;Phospho (STY);X;X;X;X;X;X;X;X;X;X;X;X;X;X;X	XXXXXXXPPPPPPPPPPPPPXXXXXXXXXXX	ETAPT(0.017)S(0.009)AY(0.178)S(0.761)S(0.036)PAR	ET(-84.74)APT(-16.57)S(-19.49)AY(-6.32)S(6.32)S(-13.27)PAR	9	2	-0.1437
O43301	23	O43301	O43301	Heat shock 70 kDa protein 12A	HSPA12A	>sp|O43301|HS12A_HUMAN Heat shock 70 kDa protein 12A OS=Homo sapiens GN=HSPA12A PE=1 SV=2	0.9023	11.1928	2.11062e-07	131.72	75.579	1	S	GSDGPRETAPTSAYSSPARSLGDTGITPLSP	X;X;X;X;X;X;X;X;X;X;X;X;X;X;X;Phospho (STY);X;X;X;X;X;X;X;X;X;X;X;X;X;X;X	PPPPPPPPPPPPPPPPPPPXXXXXXXXXXXX	ETAPT(0.019)S(0.01)AYS(0.069)S(0.902)PAR	ET(-72.16)APT(-16.77)S(-19.52)AY(-41.79)S(-11.19)S(11.19)PAR	10	2	1.0427				0.67649	0.52584	0.77083	0.8151	0.5164	0.33007
O43310;O43310-2	293;293	O43310	O43310	CBP80/20-dependent translation initiation factor	CTIF	>sp|O43310|CTIF_HUMAN CBP80/20-dependent translation initiation factor OS=Homo sapiens GN=CTIF PE=1 SV=1;>sp|O43310-2|CTIF_HUMAN Isoform 2 of CBP80/20-dependent translation initiation factor OS=Homo sapiens GN=CTIF	0.659767	5.16494	0.00474642	41.214	26.151	1	S	ENPKLEDTAGDTGHSSLEAPRSPDTLAPVAS	X;X;X;X;X;X;X;X;X;X;X;X;X;X;X;Phospho (STY);X;X;X;X;X;X;X;X;X;X;X;X;X;X;X	XXXXPPPPPPPPPPPPPPPPPPPPPPPPPPP	LEDT(0.025)AGDT(0.023)GHS(0.201)S(0.66)LEAPRS(0.065)PDT(0.026)LAPVAS(0.001)ER	LEDT(-14.26)AGDT(-14.61)GHS(-5.16)S(5.16)LEAPRS(-10.04)PDT(-14.12)LAPVAS(-28.44)ER	12	4	-0.32824
O43310;O43310-2	299;299	O43310	O43310	CBP80/20-dependent translation initiation factor	CTIF	>sp|O43310|CTIF_HUMAN CBP80/20-dependent translation initiation factor OS=Homo sapiens GN=CTIF PE=1 SV=1;>sp|O43310-2|CTIF_HUMAN Isoform 2 of CBP80/20-dependent translation initiation factor OS=Homo sapiens GN=CTIF	0.954866	13.4586	4.77037e-06	79.586	52.467	1	S	DTAGDTGHSSLEAPRSPDTLAPVASERLPPQ	X;X;X;X;X;X;X;X;X;X;X;X;X;X;X;Phospho (STY);X;X;X;X;X;X;X;X;X;X;X;X;X;X;X	PPPPPPPPPPPPPPPPPPPPPPPPPPPXXXX	LEDTAGDTGHS(0.001)S(0.001)LEAPRS(0.955)PDT(0.043)LAPVAS(0.001)ER	LEDT(-45.77)AGDT(-35.46)GHS(-31.76)S(-31.76)LEAPRS(13.46)PDT(-13.46)LAPVAS(-32.79)ER	18	3	0.6095																		0.8874	1.5238		1.264	1.1595
O43314;O43314-2	1006;1006	O43314	O43314	Inositol hexakisphosphate and diphosphoinositol-pentakisphosphate kinase 2	PPIP5K2	>sp|O43314|VIP2_HUMAN Inositol hexakisphosphate and diphosphoinositol-pentakisphosphate kinase 2 OS=Homo sapiens GN=PPIP5K2 PE=1 SV=3;>sp|O43314-2|VIP2_HUMAN Isoform 2 of Inositol hexakisphosphate and diphosphoinositol-pentakisphosphate kinase 2 OS=Homo sa	1	75.3948	0.00468112	131.12	86.691	1	S	LHYTSGVGTGRRRRRSGEQITSSPVSPKSLA	X;X;X;X;X;X;X;X;X;X;X;X;X;X;X;Phospho (STY);X;X;X;X;X;X;X;X;X;X;X;X;X;X;X	XXXXXXXXXXXXXPPPPPPPPPPPPPPPXXX	RRS(1)GEQITSSPVSPK	RRS(75.39)GEQIT(-75.39)S(-96.61)S(-107.52)PVS(-116.28)PK	3	3	-0.9795
O43314;O43314-2	1171;1150	O43314	O43314	Inositol hexakisphosphate and diphosphoinositol-pentakisphosphate kinase 2	PPIP5K2	>sp|O43314|VIP2_HUMAN Inositol hexakisphosphate and diphosphoinositol-pentakisphosphate kinase 2 OS=Homo sapiens GN=PPIP5K2 PE=1 SV=3;>sp|O43314-2|VIP2_HUMAN Isoform 2 of Inositol hexakisphosphate and diphosphoinositol-pentakisphosphate kinase 2 OS=Homo sa	0.499985	0	0.000904605	154.36	96.923	1	S	DVPRKTAEISSTALRSSPIMRKKVSLNTYTP	X;X;X;X;X;X;X;X;X;X;X;X;X;X;X;Phospho (STY);X;X;X;X;X;X;X;X;X;X;X;X;X;X;X	XXXXXPPPPPPPPPPPPPPPPXXXXXXXXXX	TAEISSTALRS(0.5)S(0.5)PIMR	T(-126.82)AEIS(-45.36)S(-55.41)T(-45.36)ALRS(0)S(0)PIMR	11	3	-0.19864
O43314;O43314-2	1172;1151	O43314	O43314	Inositol hexakisphosphate and diphosphoinositol-pentakisphosphate kinase 2	PPIP5K2	>sp|O43314|VIP2_HUMAN Inositol hexakisphosphate and diphosphoinositol-pentakisphosphate kinase 2 OS=Homo sapiens GN=PPIP5K2 PE=1 SV=3;>sp|O43314-2|VIP2_HUMAN Isoform 2 of Inositol hexakisphosphate and diphosphoinositol-pentakisphosphate kinase 2 OS=Homo sa	0.999919	40.9658	0.000736485	240.12	187.95	1	S	VPRKTAEISSTALRSSPIMRKKVSLNTYTPA	X;X;X;X;X;X;X;X;X;X;X;X;X;X;X;Phospho (STY);X;X;Oxidation (M);X;X;X;X;X;X;X;X;X;X;X;X	XXXXPPPPPPPPPPPPPPPPXXXXXXXXXXX	TAEISSTALRSS(1)PIMR	T(-131.63)AEIS(-98.17)S(-80.41)T(-61.32)ALRS(-40.97)S(40.97)PIMR	12	3	0.11097	0.87105	0.64084		0.5687					0.6657	0.7735	0.35633		0.17477		0.94883			0.64429	0.73204		0.47642					0.4436
O43318;O43318-4;O43318-3;O43318-2	439;412;439;412	O43318	O43318	Mitogen-activated protein kinase kinase kinase 7	MAP3K7	>sp|O43318|M3K7_HUMAN Mitogen-activated protein kinase kinase kinase 7 OS=Homo sapiens GN=MAP3K7 PE=1 SV=1;>sp|O43318-4|M3K7_HUMAN Isoform 1D of Mitogen-activated protein kinase kinase kinase 7 OS=Homo sapiens GN=MAP3K7;>sp|O43318-3|M3K7_HUMAN Isoform 1C o	1	68.6702	7.50369e-30	168.16	130.99	1	S	VPEIVISGNGQPRRRSIQDLTVTGTEPGQVS	X;X;X;X;X;X;X;X;X;X;X;X;X;X;X;Phospho (STY);X;X;X;X;X;X;X;X;X;X;X;X;X;X;X	XXXXXXXXXXXXXPPPPPPPPPPPPPPPPPP	RRS(1)IQDLTVTGTEPGQVSSR	RRS(68.67)IQDLT(-68.67)VT(-95.07)GT(-116.03)EPGQVS(-148.65)S(-148.65)R	3	3	0.0033264	0.75127	1.3034	0.8132	0.95671	1.3351				0.94057	1.305			1.1496	0.91169				1.3695	1.6361							3.3925	3.2216
O43353;O43353-2	355;218	O43353	O43353	Receptor-interacting serine/threonine-protein kinase 2	RIPK2	>sp|O43353|RIPK2_HUMAN Receptor-interacting serine/threonine-protein kinase 2 OS=Homo sapiens GN=RIPK2 PE=1 SV=2;>sp|O43353-2|RIPK2_HUMAN Isoform 2 of Receptor-interacting serine/threonine-protein kinase 2 OS=Homo sapiens GN=RIPK2	0.250155	0.635761	0.00226961	40.037	24.012		S	GPQEESCGSSQLHENSGSPETSRSLPAPQDN	X;X;X;X;X;X;X;X;X;X;X;X;X;X;X;Phospho (STY);X;X;X;X;X;X;X;X;X;X;X;X;X;X;X	PPPPPPPPPPPPPPPPPPPPPPPXXXXXXXX	MELSLNIPVNHGPQEES(0.216)CGS(0.216)S(0.216)QLHENS(0.25)GS(0.073)PET(0.014)S(0.014)R	MELS(-37.54)LNIPVNHGPQEES(-0.64)CGS(-0.64)S(-0.64)QLHENS(0.64)GS(-5.32)PET(-12.5)S(-12.5)R	27	4	-0.30635
O43353;O43353-2	529;392	O43353	O43353	Receptor-interacting serine/threonine-protein kinase 2	RIPK2	>sp|O43353|RIPK2_HUMAN Receptor-interacting serine/threonine-protein kinase 2 OS=Homo sapiens GN=RIPK2 PE=1 SV=2;>sp|O43353-2|RIPK2_HUMAN Isoform 2 of Receptor-interacting serine/threonine-protein kinase 2 OS=Homo sapiens GN=RIPK2	0.507139	3.75384	0.000583287	55.844	41.272	1	S	QMGLQPYPEILVVSRSPSLNLLQNKSM____	X;X;X;X;X;X;X;X;X;X;X;X;X;X;X;Phospho (STY);X;X;X;X;X;X;X;X;X;X;X;X;X;X;X	PPPPPPPPPPPPPPPPPPPPPPPPPXXXXXX	QMGLQPY(0.157)PEILVVS(0.122)RS(0.507)PS(0.214)LNLLQNK	QMGLQPY(-5.09)PEILVVS(-6.18)RS(3.75)PS(-3.75)LNLLQNK	16	3	0.43888
O43379;O43379-4	1144;1149	O43379	O43379	WD repeat-containing protein 62	WDR62	>sp|O43379|WDR62_HUMAN WD repeat-containing protein 62 OS=Homo sapiens GN=WDR62 PE=1 SV=4;>sp|O43379-4|WDR62_HUMAN Isoform 4 of WD repeat-containing protein 62 OS=Homo sapiens GN=WDR62	0.999846	38.1375	0.000268063	238.02	190.13	1	S	MDRGGSQPRAGTGYASPDRTHVLAAGKAEET	X;X;X;X;X;X;X;X;X;X;X;X;X;X;X;Phospho (STY);X;X;X;X;X;X;X;X;X;X;X;X;X;X;X	XXXXXXXXXPPPPPPPPPPPPPPPPPPXXXX	AGTGYAS(1)PDRTHVLAAGK	AGT(-113.04)GY(-71.29)AS(38.14)PDRT(-38.14)HVLAAGK	7	3	0.27993	0.93099	0.54608	0.54916	0.77322											0.76482	0.70211	0.6431	0.74349	0.63803	0.76045	0.67632	0.86768				0.49731
O43379;O43379-4	1123;1128	O43379	O43379	WD repeat-containing protein 62	WDR62	>sp|O43379|WDR62_HUMAN WD repeat-containing protein 62 OS=Homo sapiens GN=WDR62 PE=1 SV=4;>sp|O43379-4|WDR62_HUMAN Isoform 4 of WD repeat-containing protein 62 OS=Homo sapiens GN=WDR62	1	75.3152	0.00120698	116.63	66.547	1	S	FTHTFPPRATQCLVKSPEVKLMDRGGSQPRA	X;X;X;X;X;X;X;X;X;X;X;X;X;X;X;Phospho (STY);X;X;X;X;X;X;X;X;X;X;X;X;X;X;X	XXXXXXXXPPPPPPPPPPPPXXXXXXXXXXX	ATQCLVKS(1)PEVK	AT(-75.32)QCLVKS(75.32)PEVK	8	3	0.044938															0.91361	0.65585	0.41987	0.61553		0.81187	0.81889	1.0742	0.96271	0.9323	0.85643	0.85101	0.45292	1.0341
O43379;O43379-4	974;974	O43379	O43379	WD repeat-containing protein 62	WDR62	>sp|O43379|WDR62_HUMAN WD repeat-containing protein 62 OS=Homo sapiens GN=WDR62 PE=1 SV=4;>sp|O43379-4|WDR62_HUMAN Isoform 4 of WD repeat-containing protein 62 OS=Homo sapiens GN=WDR62	0.99948	32.8377	1.41513e-28	167.89	122.55	1	S	CRKEVEAGPGDQQGDSYLRVSSDSPKDQSPP	X;X;X;X;X;X;X;X;X;X;X;X;X;X;X;Phospho (STY);X;X;X;X;X;X;X;X;X;X;X;X;X;X;X	XXXPPPPPPPPPPPPPPPPXXXXXXXXXXXX	EVEAGPGDQQGDS(0.999)Y(0.001)LR	EVEAGPGDQQGDS(32.84)Y(-32.84)LR	13	2	0.32653															0.85236		0.87437		0.84213	0.58096	0.72624		0.70002
O43379;O43379-4;O43379-3;O43379-2	32;32;32;32	O43379	O43379	WD repeat-containing protein 62	WDR62	>sp|O43379|WDR62_HUMAN WD repeat-containing protein 62 OS=Homo sapiens GN=WDR62 PE=1 SV=4;>sp|O43379-4|WDR62_HUMAN Isoform 4 of WD repeat-containing protein 62 OS=Homo sapiens GN=WDR62;>sp|O43379-3|WDR62_HUMAN Isoform 3 of WD repeat-containing protein 62 O	0.569008	1.2065	5.70927e-05	100.58	78.16	1	S	KLPSVMAGVPARRGQSSPPPAPPICLRRRTR	X;X;X;X;X;X;X;X;X;X;X;X;X;X;X;Phospho (STY);X;X;X;X;X;X;X;X;X;X;X;X;X;X;X	XXXXXXXXXXXXXPPPPPPPPPPPPPPXXXX	GQS(0.569)S(0.431)PPPAPPICLR	GQS(1.21)S(-1.21)PPPAPPICLR	3	2	-0.029981
O43379;O43379-4;O43379-3;O43379-2	33;33;33;33	O43379	O43379	WD repeat-containing protein 62	WDR62	>sp|O43379|WDR62_HUMAN WD repeat-containing protein 62 OS=Homo sapiens GN=WDR62 PE=1 SV=4;>sp|O43379-4|WDR62_HUMAN Isoform 4 of WD repeat-containing protein 62 OS=Homo sapiens GN=WDR62;>sp|O43379-3|WDR62_HUMAN Isoform 3 of WD repeat-containing protein 62 O	0.991409	20.6221	0.000831971	77.795	54.94	1	S	LPSVMAGVPARRGQSSPPPAPPICLRRRTRL	X;X;X;X;X;X;X;X;X;X;X;X;X;X;X;Phospho (STY);X;X;X;X;X;X;X;X;X;X;X;X;X;X;X	XXXXXXXXXXXXPPPPPPPPPPPPPPXXXXX	GQS(0.009)S(0.991)PPPAPPICLR	GQS(-20.62)S(20.62)PPPAPPICLR	4	2	-0.22916
O43379;O43379-4	1101;1106	O43379	O43379	WD repeat-containing protein 62	WDR62	>sp|O43379|WDR62_HUMAN WD repeat-containing protein 62 OS=Homo sapiens GN=WDR62 PE=1 SV=4;>sp|O43379-4|WDR62_HUMAN Isoform 4 of WD repeat-containing protein 62 OS=Homo sapiens GN=WDR62	0.986209	18.5438	1.30989e-05	119.62	80.193	1	S	HFFNPRLSISTQFLSSLQKASRFTHTFPPRA	X;X;X;X;X;X;X;X;X;X;X;X;X;X;X;Phospho (STY);X;X;X;X;X;X;X;X;X;X;X;X;X;X;X	XXXXXXPPPPPPPPPPPPPXXXXXXXXXXXX	LSISTQFLS(0.014)S(0.986)LQK	LS(-91.59)IS(-79.64)T(-64.67)QFLS(-18.54)S(18.54)LQK	10	2	0.028872
O43379;O43379-4;O43379-3;O43379-2	49;49;49;49	O43379	O43379	WD repeat-containing protein 62	WDR62	>sp|O43379|WDR62_HUMAN WD repeat-containing protein 62 OS=Homo sapiens GN=WDR62 PE=1 SV=4;>sp|O43379-4|WDR62_HUMAN Isoform 4 of WD repeat-containing protein 62 OS=Homo sapiens GN=WDR62;>sp|O43379-3|WDR62_HUMAN Isoform 3 of WD repeat-containing protein 62 O	0.999872	39.0129	0.00104784	205.31	135.05	1	S	PPPAPPICLRRRTRLSTASEETVQNRVSLEK	X;X;X;X;X;X;X;X;X;X;X;X;X;X;X;Phospho (STY);X;X;X;X;X;X;X;X;X;X;X;X;X;X;X	XXXXXXXXXXXXPPPPPPPPPPPPPPXXXXX	TRLS(1)TASEETVQNR	T(-56.66)RLS(39.01)T(-39.01)AS(-65.7)EET(-82.84)VQNR	4	3	0.071565															0.48069	0.76394	0.63695	0.60383	0.86147	0.86513	0.66469	0.81415	0.84542	0.70256	0.90049	0.48423	0.59973	0.34382
O43379;O43379-4;O43379-3;O43379-2	52;52;52;52	O43379	O43379	WD repeat-containing protein 62	WDR62	>sp|O43379|WDR62_HUMAN WD repeat-containing protein 62 OS=Homo sapiens GN=WDR62 PE=1 SV=4;>sp|O43379-4|WDR62_HUMAN Isoform 4 of WD repeat-containing protein 62 OS=Homo sapiens GN=WDR62;>sp|O43379-3|WDR62_HUMAN Isoform 3 of WD repeat-containing protein 62 O	0.945706	14.4313	0.00254617	109.95	59.867	1	S	APPICLRRRTRLSTASEETVQNRVSLEKVLG	X;X;X;X;X;X;X;X;X;X;X;X;X;X;X;Phospho (STY);X;X;X;X;X;X;X;X;X;X;X;X;X;X;X	XXXXXXXXXPPPPPPPPPPPPPPXXXXXXXX	TRLS(0.034)T(0.02)AS(0.946)EETVQNR	T(-53.49)RLS(-14.43)T(-16.73)AS(14.43)EET(-39.68)VQNR	7	3	-0.11489
O43379;O43379-4	501;501	O43379	O43379	WD repeat-containing protein 62	WDR62	>sp|O43379|WDR62_HUMAN WD repeat-containing protein 62 OS=Homo sapiens GN=WDR62 PE=1 SV=4;>sp|O43379-4|WDR62_HUMAN Isoform 4 of WD repeat-containing protein 62 OS=Homo sapiens GN=WDR62	1	157.591	0.000105503	316.54	205.97	1	S	GTPMDVKAGVRVMQVSPDGQHLASGDRSGNL	X;X;X;X;X;X;X;X;X;X;X;X;X;X;X;Phospho (STY);X;X;X;X;X;X;X;X;X;X;X;X;X;X;X	XXXXXXXXXXXPPPPPPPPPPPPPPPPXXXX	VMQVS(1)PDGQHLASGDR	VMQVS(157.59)PDGQHLAS(-157.59)GDR	5	3	-0.13374	0.83733	0.75907		0.54577	0.56829	0.82485	0.52496	0.68871	0.66419	0.86259	0.85459	0.58974	0.82183	0.80467	1.0151	0.76427	0.71428	0.5294	0.72173	0.5925	0.76314	0.72083	0.77899	0.4953	0.95845		0.8451	0.45681
O43390;O43390-3;O43390-2	22;22;22	O43390	O43390	Heterogeneous nuclear ribonucleoprotein R	HNRNPR	>sp|O43390|HNRPR_HUMAN Heterogeneous nuclear ribonucleoprotein R OS=Homo sapiens GN=HNRNPR PE=1 SV=1;>sp|O43390-3|HNRPR_HUMAN Isoform 3 of Heterogeneous nuclear ribonucleoprotein R OS=Homo sapiens GN=HNRNPR;>sp|O43390-2|HNRPR_HUMAN Isoform 2 of Heterogeneo	0.660926	6.73307	0.000780503	133.96	111.53	1	S	GNAVQLKEEEEPMDTSSVTHTEHYKTLIEAG	X;X;X;X;X;X;X;X;X;X;X;X;X;X;X;Phospho (STY);X;X;X;X;X;X;X;X;X;X;X;X;X;X;X	XXXXXXXPPPPPPPPPPPPPPPPPPXXXXXX	EEEEPMDT(0.14)S(0.661)S(0.121)VT(0.034)HT(0.042)EHY(0.003)K	EEEEPMDT(-6.73)S(6.73)S(-7.39)VT(-12.92)HT(-11.97)EHY(-24.21)K	9	3	1.3011				2.6946
O43390;O43390-3;O43390-2	23;23;23	O43390	O43390	Heterogeneous nuclear ribonucleoprotein R	HNRNPR	>sp|O43390|HNRPR_HUMAN Heterogeneous nuclear ribonucleoprotein R OS=Homo sapiens GN=HNRNPR PE=1 SV=1;>sp|O43390-3|HNRPR_HUMAN Isoform 3 of Heterogeneous nuclear ribonucleoprotein R OS=Homo sapiens GN=HNRNPR;>sp|O43390-2|HNRPR_HUMAN Isoform 2 of Heterogeneo	0.637029	7.05433	0.000834289	74.89	53.47	1	S	NAVQLKEEEEPMDTSSVTHTEHYKTLIEAGL	X;X;X;X;X;X;X;X;X;X;X;X;X;X;X;Phospho (STY);X;X;X;X;X;X;X;X;X;X;X;X;X;X;X	XXXXXXPPPPPPPPPPPPPPPPPPXXXXXXX	EEEEPMDT(0.096)S(0.096)S(0.637)VT(0.126)HT(0.035)EHY(0.01)K	EEEEPMDT(-8.21)S(-8.21)S(7.05)VT(-7.05)HT(-12.62)EHY(-17.97)K	10	3	-0.051249
O43395	131	O43395	O43395	U4/U6 small nuclear ribonucleoprotein Prp3	PRPF3	>sp|O43395|PRPF3_HUMAN U4/U6 small nuclear ribonucleoprotein Prp3 OS=Homo sapiens GN=PRPF3 PE=1 SV=2	0.876147	8.60991	8.58731e-09	92.565	75.648	1	S	FEEVEEEPEVIPGPPSESPGMLTKLQIKQMM	X;X;X;X;X;X;X;X;X;X;X;X;X;X;X;Phospho (STY);X;X;X;X;X;X;X;X;X;X;X;X;X;X;X	PPPPPPPPPPPPPPPPPPPPPPPPXXXXXXX	IPRFEEVEEEPEVIPGPPS(0.876)ES(0.121)PGMLT(0.003)K	IPRFEEVEEEPEVIPGPPS(8.61)ES(-8.61)PGMLT(-24.39)K	19	3	-0.46281							1.2119										1.9305
O43395	133	O43395	O43395	U4/U6 small nuclear ribonucleoprotein Prp3	PRPF3	>sp|O43395|PRPF3_HUMAN U4/U6 small nuclear ribonucleoprotein Prp3 OS=Homo sapiens GN=PRPF3 PE=1 SV=2	0.918404	11.9436	2.82332e-08	92.416	63.982	1	S	EVEEEPEVIPGPPSESPGMLTKLQIKQMMEA	X;X;X;X;X;X;X;X;X;X;X;X;X;X;X;Phospho (STY);X;X;X;X;X;X;X;X;X;X;X;X;X;X;X	PPPPPPPPPPPPPPPPPPPPPPXXXXXXXXX	FEEVEEEPEVIPGPPS(0.059)ES(0.918)PGMLT(0.023)K	FEEVEEEPEVIPGPPS(-11.94)ES(11.94)PGMLT(-16.03)K	18	2	-1.8412	1.3818	1.091
[truncated: 18,065 more rows]
[truncated: 48 more columns]

## Sheet: Filtered and values replaced
Ratio H/L 01_0 min	Ratio H/L 01_01 min	Ratio H/L 01_02 min	Ratio H/L 01_03 min	Ratio H/L 01_04 min	Ratio H/L 01_05 min	Ratio H/L 01_07 min	Ratio H/L 01_08 min	Ratio H/L 01_09 min	Ratio H/L 01_10 min	Ratio H/L 01_15 min	Ratio H/L 01_20 min	Ratio H/L 01_25 min	Ratio H/L 01_30 min	Ratio H/L 02_0 min	Ratio H/L 02_01 min	Ratio H/L 02_02 min	Ratio H/L 02_03 min	Ratio H/L 02_04 min	Ratio H/L 02_05 min	Ratio H/L 02_06 min	Ratio H/L 02_07 min	Ratio H/L 02_08 min	Ratio H/L 02_09 min	Ratio H/L 02_10 min	Ratio H/L 02_15 min	Ratio H/L 02_20 min	Ratio H/L 02_25 min	Ratio H/L 02_30 min	Ratio H/L 02_40 min	Ratio H/L 02_50 min	Ratio H/L 02_60 min	Ratio H/L 03_0 min	Ratio H/L 03_01 min	Ratio H/L 03_02 min	Ratio H/L 03_03 min	Ratio H/L 03_04 min	Ratio H/L 03_05 min	Ratio H/L 03_06 min	Ratio H/L 03_07 min	Ratio H/L 03_08 min	Ratio H/L 03_09 min	Ratio H/L 03_10 min	Ratio H/L 03_15 min	Ratio H/L 03_20 min	Ratio H/L 03_25 min	Ratio H/L 03_30 min	Ratio H/L 03_40 min	Ratio H/L 03_50 min	Ratio H/L 03_60 min
[truncated: 13,467 more rows]
[truncated: 176 more columns]

[truncated: 3 more sheets: Clustered Output, Cluster Half-lives, SP_TP Counts]
