# Supplementary material for: Ordered dephosphorylation initiated by the selective proteolysis of cyclin B drives mitotic exit
Source: eLife. 2020 Sep 1;9:e59885. doi: 10.7554/eLife.59885 (PMC7529458; doi:10.7554/eLife.59885)
Supplement: Figure 2—source data 3. [file elife-59885-fig2-data3.xlsx]

## Sheet: Total proteome MS data
Protein IDs	Majority protein IDs	Peptide counts (all)	Peptide counts (razor+unique)	Peptide counts (unique)	Protein names	Gene names	Fasta headers	Number of proteins	Peptides	Razor + unique peptides	Unique peptides	Sequence coverage [%]	Unique + razor sequence coverage [%]	Unique sequence coverage [%]	Mol. weight [kDa]	Sequence length	Sequence lengths	Ratio H/L Control_01_0min	Ratio H/L Control_01_10min	Ratio H/L Control_01_15min	Ratio H/L Control_01_17min	Ratio H/L Control_01_19min	Ratio H/L Control_01_21min	Ratio H/L Control_01_23min	Ratio H/L Control_01_25min	Ratio H/L Control_01_27min	Ratio H/L Control_01_29min	Ratio H/L Control_01_31min	Ratio H/L Control_01_33min	Ratio H/L Control_01_35min	Ratio H/L Control_01_37min	Ratio H/L Control_01_39min	Ratio H/L Control_01_41min	Ratio H/L Control_01_43min	Ratio H/L Control_01_45min	Ratio H/L Control_02_0min	Ratio H/L Control_02_10min	Ratio H/L Control_02_15min	Ratio H/L Control_02_17min	Ratio H/L Control_02_19min	Ratio H/L Control_02_21min	Ratio H/L Control_02_23min	Ratio H/L Control_02_25min	Ratio H/L Control_02_27min	Ratio H/L Control_02_29min	Ratio H/L Control_02_31min	Ratio H/L Control_02_33min	Ratio H/L Control_02_35min	Ratio H/L Control_02_37min
Q15424;B7ZLP6;A0AV56;Q15424-2;F5GZU3;B7Z2F6;K7ES42;K7EII0	Q15424;B7ZLP6;A0AV56;Q15424-2;F5GZU3;B7Z2F6	27;27;27;26;21;20;6;2	14;14;14;13;8;7;6;2	14;14;14;13;8;7;6;2	Scaffold attachment factor B1	SAFB	>sp|Q15424|SAFB1_HUMAN Scaffold attachment factor B1 OS=Homo sapiens GN=SAFB PE=1 SV=4;>tr|B7ZLP6|B7ZLP6_HUMAN SAFB protein OS=Homo sapiens GN=SAFB PE=2 SV=1;>tr|A0AV56|A0AV56_HUMAN SAFB protein OS=Homo sapiens GN=SAFB PE=2 SV=1;>sp|Q15424-2|SAFB1_HUMAN Is	8	27	14	14	28.1	14.8	14.8	102.64	915	915;916;917;848;747;759;106;153	0.87844	1.2967	1.1646	1.0348	1.2047	1.1069	1.2179	1.0701	1.2329	1.0957	1.2353	1.0858	1.4868	1.2338	1.2632	1.0484	1.1601	1.076	0.89609	1.1721	1.2555	1.1062	1.3228	1.302	1.0183	1.2728	1.1994	1.2175	1.271	1.3246	1.283	1.2797
A0AV96;A0AV96-2;D6R9D6;B7Z8Z7;D6RBS9;D6REZ6;D6R9M7;D6RA49;D6RFL5;D6RBP6;D6RCT1;Q9NQ94-5	A0AV96;A0AV96-2;D6R9D6;B7Z8Z7;D6RBS9;D6REZ6;D6R9M7	10;10;9;9;8;7;5;4;4;3;1;1	10;10;9;9;8;7;5;4;4;3;1;1	9;9;8;8;7;7;5;4;4;3;1;0	RNA-binding protein 47	RBM47	>sp|A0AV96|RBM47_HUMAN RNA-binding protein 47 OS=Homo sapiens GN=RBM47 PE=1 SV=2;>sp|A0AV96-2|RBM47_HUMAN Isoform 2 of RNA-binding protein 47 OS=Homo sapiens GN=RBM47;>tr|D6R9D6|D6R9D6_HUMAN RNA-binding protein 47 OS=Homo sapiens GN=RBM47 PE=2 SV=1;>tr|B7Z	12	10	10	9	23.9	23.9	22.1	64.098	593	593;524;393;555;217;193;159;124;137;114;59;510	NaN	NaN	NaN	NaN	NaN	NaN	NaN	NaN	NaN	NaN	NaN	NaN	NaN	NaN	NaN	NaN	NaN	NaN	NaN	NaN	1.4795	NaN	NaN	NaN	NaN	NaN	NaN	NaN	NaN	NaN	NaN	1.6672
A0AVT1;A0AVT1-2;A0AVT1-3;H0Y8S8;A0AVT1-4;H0Y9U5	A0AVT1;A0AVT1-2	32;21;10;9;9;1	32;21;10;9;9;1	32;21;10;9;9;1	Ubiquitin-like modifier-activating enzyme 6	UBA6	>sp|A0AVT1|UBA6_HUMAN Ubiquitin-like modifier-activating enzyme 6 OS=Homo sapiens GN=UBA6 PE=1 SV=1;>sp|A0AVT1-2|UBA6_HUMAN Isoform 2 of Ubiquitin-like modifier-activating enzyme 6 OS=Homo sapiens GN=UBA6	6	32	32	32	41.3	41.3	41.3	117.97	1052	1052;578;389;271;340;88	0.97752	1.2191	1.2009	0.93204	0.9971	1.2703	0.83784	1.0508	1.1741	1.0444	1.0705	1.2107	1.3724	1.183	1.2384	1.4014	1.2274	1.0688	1.0159	1.1844	1.085	1.219	1.1375	1.1405	0.86123	1.1048	0.96908	1.2124	1.0827	1.1419	1.0222	1.0272
H7BXI1;A0FGR8-6;A0FGR8;A0FGR8-2;F2Z3K9;A0FGR8-5	H7BXI1;A0FGR8-6;A0FGR8;A0FGR8-2	23;23;22;22;9;9	23;23;22;22;9;9	11;11;10;10;7;7	Extended synaptotagmin-2	ESYT2	>tr|H7BXI1|H7BXI1_HUMAN Extended synaptotagmin-2 (Fragment) OS=Homo sapiens GN=ESYT2 PE=2 SV=1;>sp|A0FGR8-6|ESYT2_HUMAN Isoform 6 of Extended synaptotagmin-2 OS=Homo sapiens GN=ESYT2;>sp|A0FGR8|ESYT2_HUMAN Extended synaptotagmin-2 OS=Homo sapiens GN=ESYT2	6	23	23	11	35.7	35.7	18	98.008	884	884;942;921;893;328;328	1.3704	1.0413	1.0499	1.12	0.96874	0.81389	1.0416	0.84267	1.0299	1.068	0.98366	0.99541	1.2289	1.0631	0.73561	0.97659	0.67432	0.90736	1.0965	1.085	0.81209	1.0003	1.1421	0.96787	0.75046	1.3679	1.3672	1.2849	0.97521	1.1468	0.94111	1.1919
A0MZ66;A0MZ66-3;A0MZ66-4;A0MZ66-5;A0MZ66-6;A0MZ66-8;A0MZ66-2;A0MZ66-7	A0MZ66;A0MZ66-3;A0MZ66-4;A0MZ66-5;A0MZ66-6;A0MZ66-8;A0MZ66-2	23;23;22;21;21;20;18;6	23;23;22;21;21;20;18;6	23;23;22;21;21;20;18;6	Shootin-1	KIAA1598	>sp|A0MZ66|SHOT1_HUMAN Shootin-1 OS=Homo sapiens GN=KIAA1598 PE=1 SV=4;>sp|A0MZ66-3|SHOT1_HUMAN Isoform 3 of Shootin-1 OS=Homo sapiens GN=KIAA1598;>sp|A0MZ66-4|SHOT1_HUMAN Isoform 4 of Shootin-1 OS=Homo sapiens GN=KIAA1598;>sp|A0MZ66-5|SHOT1_HUMAN Isoform	8	23	23	23	41.8	41.8	41.8	71.639	631	631;649;558;571;601;498;456;219	NaN	1.1426	1.2754	1.2573	1.2198	0.99687	0.96611	0.87649	1.2329	0.99425	1.071	1.3939	0.84293	1.573	1.1532	NaN	0.93228	NaN	1.0612	1.1687	1.487	1.0569	1.139	NaN	0.94564	NaN	NaN	1.0579	1.0161	1.1413	1.1457	1.0304
A1L0T0;M0R026;E9PJS0;M0R1B5;M0QZX5;E9PL44;E9PNL1	A1L0T0;M0R026;E9PJS0	15;12;8;5;5;4;1	15;12;8;5;5;4;1	15;12;8;5;5;4;1	Acetolactate synthase-like protein	ILVBL	>sp|A1L0T0|ILVBL_HUMAN Acetolactate synthase-like protein OS=Homo sapiens GN=ILVBL PE=1 SV=2;>tr|M0R026|M0R026_HUMAN Acetolactate synthase-like protein OS=Homo sapiens GN=ILVBL PE=4 SV=1;>tr|E9PJS0|E9PJS0_HUMAN Acetolactate synthase-like protein (Fragment)	7	15	15	15	33.2	33.2	33.2	67.867	632	632;525;262;166;230;166;52	0.85322	0.89871	1.0113	0.74325	0.9741	1.0361	1.0273	0.66442	0.9264	0.99117	1.0666	0.98972	1.0599	0.94112	0.99605	1.0167	0.97842	1.1206	0.90551	0.93605	0.8316	0.95629	1.1077	1.0407	0.78528	0.91059	0.98767	1.0709	1.0054	0.90947	1.0087	1.0304
A1L188	A1L188	1	1	1	Uncharacterized protein C17orf89	C17orf89	>sp|A1L188|CQ089_HUMAN Uncharacterized protein C17orf89 OS=Homo sapiens GN=C17orf89 PE=2 SV=1	1	1	1	1	17.6	17.6	17.6	7.7558	74	74	NaN	NaN	NaN	NaN	NaN	NaN	NaN	NaN	NaN	NaN	NaN	NaN	NaN	NaN	NaN	NaN	NaN	NaN	NaN	NaN	NaN	NaN	NaN	NaN	NaN	NaN	NaN	NaN	NaN	NaN	NaN	NaN
A1X283;G3V144	A1X283	14;5	14;5	12;3	SH3 and PX domain-containing protein 2B	SH3PXD2B	>sp|A1X283|SPD2B_HUMAN SH3 and PX domain-containing protein 2B OS=Homo sapiens GN=SH3PXD2B PE=1 SV=3	2	14	14	12	23.3	23.3	21.3	101.58	911	911;430	NaN	1.2239	1.7157	1.0808	NaN	NaN	1.0575	1.1362	1.7237	1.0273	1.1176	0.8665	1.2136	1.2669	NaN	1.2402	NaN	NaN	0.99204	1.4164	1.2305	1.2285	1.6405	1.428	0.96839	1.1692	1.1341	1.1299	1.4213	1.3926	1.3544	1.5246
P16949;A2A2D0;P16949-2	P16949;A2A2D0;P16949-2	5;5;5	5;5;5	4;4;4	Stathmin	STMN1	>sp|P16949|STMN1_HUMAN Stathmin OS=Homo sapiens GN=STMN1 PE=1 SV=3;>tr|A2A2D0|A2A2D0_HUMAN Stathmin (Fragment) OS=Homo sapiens GN=STMN1 PE=2 SV=1;>sp|P16949-2|STMN1_HUMAN Isoform 2 of Stathmin OS=Homo sapiens GN=STMN1	3	5	5	4	28.9	28.9	22.8	17.302	149	149;86;174	NaN	NaN	NaN	NaN	NaN	NaN	NaN	NaN	NaN	NaN	NaN	3.5428	NaN	NaN	NaN	NaN	NaN	NaN	NaN	1.975	NaN	2.2287	3.3235	NaN	NaN	NaN	NaN	NaN	NaN	NaN	NaN	NaN
Q9Y672;A2A2G4	Q9Y672;A2A2G4	2;2	2;2	2;2	Dolichyl pyrophosphate Man9GlcNAc2 alpha-1,3-glucosyltransferase	ALG6	>sp|Q9Y672|ALG6_HUMAN Dolichyl pyrophosphate Man9GlcNAc2 alpha-1,3-glucosyltransferase OS=Homo sapiens GN=ALG6 PE=1 SV=1;>tr|A2A2G4|A2A2G4_HUMAN Dolichyl pyrophosphate Man9GlcNAc2 alpha-1,3-glucosyltransferase OS=Homo sapiens GN=ALG6 PE=4 SV=1	2	2	2	2	4.9	4.9	4.9	58.18	507	507;509	NaN	NaN	NaN	NaN	NaN	NaN	NaN	NaN	NaN	NaN	NaN	NaN	NaN	NaN	NaN	NaN	NaN	NaN	NaN	NaN	NaN	NaN	NaN	NaN	NaN	NaN	NaN	NaN	NaN	NaN	NaN	NaN
Q9Y312;A2A2Q9	Q9Y312;A2A2Q9	11;11	11;11	11;11	Protein AAR2 homolog	AAR2	>sp|Q9Y312|AAR2_HUMAN Protein AAR2 homolog OS=Homo sapiens GN=AAR2 PE=1 SV=2;>tr|A2A2Q9|A2A2Q9_HUMAN Protein AAR2 homolog OS=Homo sapiens GN=AAR2 PE=4 SV=1	2	11	11	11	41.1	41.1	41.1	43.472	384	384;398	1.1238	1.2858	1.1303	1.3131	1.2368	1.2043	1.0303	1.0038	1.4363	1.2659	1.2262	1.1945	0.87968	1.3312	1.0754	1.3437	1.4364	1.0978	0.91191	1.3338	NaN	0.9411	1.1174	1.2045	1.1613	1.1478	NaN	1.29	1.2026	1.6441	1.3527	1.1196
P04156-2;A2A2V1;P04156	P04156-2;A2A2V1;P04156	1;1;1	1;1;1	1;1;1	Major prion protein	PRNP	>sp|P04156-2|PRIO_HUMAN Isoform 2 of Major prion protein OS=Homo sapiens GN=PRNP;>tr|A2A2V1|A2A2V1_HUMAN Major prion protein (Fragment) OS=Homo sapiens GN=PRNP PE=2 SV=1;>sp|P04156|PRIO_HUMAN Major prion protein OS=Homo sapiens GN=PRNP PE=1 SV=1	3	1	1	1	4.9	4.9	4.9	26.885	246	246;249;253	NaN	NaN	NaN	NaN	NaN	NaN	NaN	NaN	NaN	NaN	NaN	NaN	NaN	NaN	NaN	NaN	NaN	NaN	NaN	NaN	NaN	NaN	NaN	NaN	NaN	NaN	NaN	NaN	NaN	NaN	NaN	NaN
P35611;P35611-2;E7EV99;A2A3N8;E7ENY0;P35611-3;Q86XM2;H0Y9H2;H0YFD8;D6RAH3	P35611;P35611-2;E7EV99;A2A3N8;E7ENY0;P35611-3;Q86XM2;H0Y9H2	7;7;7;7;7;7;6;5;2;1	7;7;7;7;7;7;6;5;2;1	7;7;7;7;7;7;6;5;2;1	Alpha-adducin	ADD1	>sp|P35611|ADDA_HUMAN Alpha-adducin OS=Homo sapiens GN=ADD1 PE=1 SV=2;>sp|P35611-2|ADDA_HUMAN Isoform 2 of Alpha-adducin OS=Homo sapiens GN=ADD1;>tr|E7EV99|E7EV99_HUMAN Alpha-adducin OS=Homo sapiens GN=ADD1 PE=2 SV=1;>tr|A2A3N8|A2A3N8_HUMAN Adducin 1 (Alph	10	7	7	7	15.6	15.6	15.6	80.954	737	737;631;632;662;663;768;662;444;105;137	NaN	1.1232	NaN	NaN	NaN	1.1325	NaN	NaN	NaN	NaN	1.0396	0.97486	NaN	NaN	NaN	0.90353	NaN	NaN	NaN	NaN	NaN	NaN	NaN	NaN	NaN	NaN	NaN	NaN	NaN	1.2011	NaN	NaN
O15533;D3YTI9;A8MUD0;A2ABB9;A2AB90;O15533-3;O15533-2;Q6P1N7;O15533-4;F8VS90;C9JA35;Q5HYV0;A2AB92	O15533;D3YTI9;A8MUD0;A2ABB9;A2AB90;O15533-3;O15533-2;Q6P1N7;O15533-4;F8VS90	9;9;9;9;9;9;8;5;5;5;3;1;1	9;9;9;9;9;9;8;5;5;5;3;1;1	9;9;9;9;9;9;8;5;5;5;3;1;1	Tapasin	TAPBP	>sp|O15533|TPSN_HUMAN Tapasin OS=Homo sapiens GN=TAPBP PE=1 SV=1;>tr|D3YTI9|D3YTI9_HUMAN Tapasin OS=Homo sapiens GN=TAPBP PE=4 SV=1;>tr|A8MUD0|A8MUD0_HUMAN Tapasin OS=Homo sapiens GN=TAPBP PE=4 SV=2;>tr|A2ABB9|A2ABB9_HUMAN Tapasin OS=Homo sapiens GN=TAPBP	13	9	9	9	29.5	29.5	29.5	47.625	448	448;448;448;466;466;504;412;156;361;361;192;202;202	0.96765	0.95862	0.93913	NaN	1.0449	NaN	0.95089	0.8966	0.87231	0.96024	0.923	NaN	0.89672	1.0681	0.82969	1.0141	0.77312	0.87358	0.85493	1.0923	1.0263	NaN	1.1282	1.0216	0.91902	0.90277	1.0919	0.96564	0.99815	1.0347	NaN	0.97428
A2ABF8;Q96KQ7-2;H0YIM0;H0YHA9;B0UZY3;Q96KQ7;B0UZY0;B0UZY1;A2ABF9;A2BED6;A2BED7;H0Y4K5	A2ABF8;Q96KQ7-2;H0YIM0;H0YHA9;B0UZY3;Q96KQ7;B0UZY0;B0UZY1;A2ABF9;A2BED6;A2BED7	6;6;6;6;6;6;6;6;6;5;5;1	6;6;6;6;6;6;6;6;6;5;5;1	6;6;6;6;6;6;6;6;6;5;5;1	Histone-lysine N-methyltransferase EHMT2	EHMT2	>tr|A2ABF8|A2ABF8_HUMAN Histone-lysine N-methyltransferase EHMT2 OS=Homo sapiens GN=EHMT2 PE=3 SV=1;>sp|Q96KQ7-2|EHMT2_HUMAN Isoform 2 of Histone-lysine N-methyltransferase EHMT2 OS=Homo sapiens GN=EHMT2;>tr|H0YIM0|H0YIM0_HUMAN Histone-lysine N-methyltrans	12	6	6	6	6.7	6.7	6.7	135.42	1233	1233;1176;1031;1031;1176;1210;1233;1267;1267;888;922;298	NaN	NaN	NaN	NaN	NaN	NaN	NaN	NaN	NaN	NaN	1.1644	1.3605	NaN	1.1615	1.3308	NaN	0.98059	NaN	NaN	NaN	NaN	NaN	1.0997	NaN	NaN	NaN	NaN	NaN	NaN	0.87788	NaN	NaN
P28065;B0V0T3;A2ACR1;P28065-2;B0V0T2;A2ACR0;B4DZW2;B0V060;A2ACQ9	P28065;B0V0T3;A2ACR1;P28065-2;B0V0T2;A2ACR0	4;4;4;4;2;2;1;1;1	4;4;4;4;2;2;1;1;1	4;4;4;4;2;2;1;1;1	Proteasome subunit beta type-9;Proteasome subunit beta type	PSMB9	>sp|P28065|PSB9_HUMAN Proteasome subunit beta type-9 OS=Homo sapiens GN=PSMB9 PE=1 SV=2;>tr|B0V0T3|B0V0T3_HUMAN Proteasome subunit beta type OS=Homo sapiens GN=PSMB9 PE=3 SV=1;>tr|A2ACR1|A2ACR1_HUMAN Proteasome subunit beta type OS=Homo sapiens GN=PSMB9 PE	9	4	4	4	21	21	21	23.264	219	219;196;196;209;131;131;154;178;178	NaN	NaN	NaN	NaN	NaN	NaN	NaN	NaN	NaN	NaN	NaN	NaN	NaN	NaN	NaN	NaN	NaN	NaN	NaN	NaN	NaN	1.1837	1.1854	1.1725	NaN	NaN	NaN	NaN	NaN	1.3753	1.1415	1.1007
Q13084;A2IDC6;Q4TT38;A2IDC7;Q4TT37	Q13084;A2IDC6;Q4TT38;A2IDC7;Q4TT37	6;6;6;5;5	6;6;6;5;5	6;6;6;5;5	39S ribosomal protein L28, mitochondrial	MRPL28	>sp|Q13084|RM28_HUMAN 39S ribosomal protein L28, mitochondrial OS=Homo sapiens GN=MRPL28 PE=1 SV=4;>tr|A2IDC6|A2IDC6_HUMAN 39S ribosomal protein L28, mitochondrial (Fragment) OS=Homo sapiens GN=MRPL28 PE=2 SV=1;>tr|Q4TT38|Q4TT38_HUMAN 39S ribosomal protein	5	6	6	6	22.3	22.3	22.3	30.156	256	256;240;256;194;218	NaN	1.0696	1.5154	1.244	1.0322	1.2586	0.78902	0.78039	1.5234	1.1252	NaN	0.99212	0.85083	1.3122	1.088	1.2249	1.3062	1.0574	NaN	1.0697	NaN	NaN	NaN	NaN	NaN	NaN	NaN	NaN	NaN	NaN	NaN	NaN
A2RRP1;A2RRP1-2;H0Y5G7;H7BZU5;H7BZR3	A2RRP1;A2RRP1-2;H0Y5G7	11;9;7;2;1	11;9;7;2;1	11;9;7;2;1	Neuroblastoma-amplified sequence	NBAS	>sp|A2RRP1|NBAS_HUMAN Neuroblastoma-amplified sequence OS=Homo sapiens GN=NBAS PE=1 SV=2;>sp|A2RRP1-2|NBAS_HUMAN Isoform 2 of Neuroblastoma-amplified sequence OS=Homo sapiens GN=NBAS;>tr|H0Y5G7|H0Y5G7_HUMAN Neuroblastoma-amplified sequence (Fragment) OS=Ho	5	11	11	11	6.1	6.1	6.1	268.57	2371	2371;2251;1419;204;184	NaN	NaN	NaN	NaN	NaN	NaN	NaN	NaN	NaN	NaN	NaN	NaN	NaN	NaN	NaN	NaN	NaN	NaN	NaN	NaN	NaN	NaN	NaN	NaN	NaN	1.1668	1.6161	1.6224	NaN	NaN	NaN	NaN
A3KMH1;A3KMH1-3;E2QRD0;A3KMH1-2;C9JBW2	A3KMH1;A3KMH1-3;E2QRD0;A3KMH1-2	29;29;28;20;3	29;29;28;20;3	29;29;28;20;3	von Willebrand factor A domain-containing protein 8	VWA8	>sp|A3KMH1|VWA8_HUMAN von Willebrand factor A domain-containing protein 8 OS=Homo sapiens GN=VWA8 PE=1 SV=2;>sp|A3KMH1-3|VWA8_HUMAN Isoform 3 of von Willebrand factor A domain-containing protein 8 OS=Homo sapiens GN=VWA8;>tr|E2QRD0|E2QRD0_HUMAN von Willebr	5	29	29	29	20.1	20.1	20.1	214.82	1905	1905;1872;1809;1039;121	1.1276	NaN	1.3332	1.1872	NaN	1.0555	1.2531	NaN	1.1189	1.2944	NaN	NaN	0.87124	NaN	NaN	1.2265	NaN	NaN	NaN	NaN	1.2073	NaN	1.1716	1.0032	0.65733	1.1001	0.91072	1.2339	1.0437	NaN	NaN	NaN
A3KN83;A3KN83-3;A3KN83-2;A3KN83-4	A3KN83;A3KN83-3;A3KN83-2;A3KN83-4	10;10;10;6	10;10;10;6	7;7;7;4	Protein strawberry notch homolog 1	SBNO1	>sp|A3KN83|SBNO1_HUMAN Protein strawberry notch homolog 1 OS=Homo sapiens GN=SBNO1 PE=1 SV=1;>sp|A3KN83-3|SBNO1_HUMAN Isoform 3 of Protein strawberry notch homolog 1 OS=Homo sapiens GN=SBNO1;>sp|A3KN83-2|SBNO1_HUMAN Isoform 2 of Protein strawberry notch ho	4	10	10	7	8.3	8.3	5.7	154.31	1393	1393;1391;1392;732	NaN	NaN	NaN	NaN	NaN	NaN	NaN	NaN	NaN	NaN	NaN	NaN	NaN	NaN	NaN	NaN	NaN	NaN	NaN	NaN	NaN	NaN	NaN	NaN	NaN	NaN	NaN	NaN	NaN	NaN	NaN	NaN
P20839;A4D0Z6;E7EQS0;P20839-3;C9JV30;J3KNX8;P20839-2;P20839-4;C9J381;C9K0R9;C9J029;H7C5T1;H7C511	P20839;A4D0Z6;E7EQS0;P20839-3;C9JV30;J3KNX8;P20839-2;P20839-4;C9J381	21;21;21;21;21;21;20;20;20;10;4;3;3	19;19;19;19;19;19;18;18;18;8;4;3;3	19;19;19;19;19;19;18;18;18;8;4;3;3	Inosine-5-monophosphate dehydrogenase 1;Inosine-5-monophosphate dehydrogenase	IMPDH1	>sp|P20839|IMDH1_HUMAN Inosine-5-monophosphate dehydrogenase 1 OS=Homo sapiens GN=IMPDH1 PE=1 SV=2;>tr|A4D0Z6|A4D0Z6_HUMAN Inosine-5-monophosphate dehydrogenase OS=Homo sapiens GN=IMPDH1 PE=3 SV=1;>tr|E7EQS0|E7EQS0_HUMAN Inosine-5-monophosphate dehydrog	13	21	19	19	54.1	50.8	50.8	55.405	514	514;599;530;563;566;589;489;509;513;289;184;190;226	0.87311	1.1555	1.0272	1.304	1.2775	1.3456	0.96491	0.86953	1.2817	1.1342	1.1945	1.3725	0.97342	1.2229	1.2521	1.1792	1.1104	1.2925	0.94596	1.1468	1.0317	1.0439	1.0916	1.0445	0.90092	1.0085	1.148	1.37	1.1792	1.0571	1.2373	1.1185
A4D1E9;C9J8R7;C9JNI1;A4D1E9-2;C9JEQ8	A4D1E9;C9J8R7;C9JNI1;A4D1E9-2	10;6;6;6;3	10;6;6;6;3	10;6;6;6;3	GTP-binding protein 10	GTPBP10	>sp|A4D1E9|GTPBA_HUMAN GTP-binding protein 10 OS=Homo sapiens GN=GTPBP10 PE=1 SV=1;>tr|C9J8R7|C9J8R7_HUMAN GTP-binding protein 10 (Fragment) OS=Homo sapiens GN=GTPBP10 PE=2 SV=1;>tr|C9JNI1|C9JNI1_HUMAN GTP-binding protein 10 (Fragment) OS=Homo sapiens GN=G	5	10	10	10	33.6	33.6	33.6	42.932	387	387;210;236;308;243	NaN	NaN	NaN	NaN	NaN	NaN	NaN	NaN	NaN	NaN	NaN	NaN	NaN	NaN	NaN	NaN	NaN	NaN	NaN	NaN	NaN	NaN	NaN	NaN	NaN	NaN	NaN	NaN	NaN	NaN	NaN	NaN
O94901;O94901-5;O94901-8;E9PHI4;A4D2Q0;O94901-6;H0Y742;H0Y6N5;O94901-3;O94901-2;O94901-7;H7C2K3;E7EP45;H7C019;C9JK55;C9JR15;O94901-4;C9JS54;C9JJU6;C9K051;H7C3X3	O94901;O94901-5;O94901-8;E9PHI4;A4D2Q0;O94901-6;H0Y742;H0Y6N5	7;7;7;7;7;6;5;4;3;3;3;3;3;2;2;1;1;1;1;1;1	7;7;7;7;7;6;5;4;3;3;3;3;3;2;2;1;1;1;1;1;1	7;7;7;7;7;6;5;4;3;3;3;3;3;2;2;1;1;1;1;1;1	SUN domain-containing protein 1	SUN1;UNC84A	>sp|O94901|SUN1_HUMAN SUN domain-containing protein 1 OS=Homo sapiens GN=SUN1 PE=1 SV=3;>sp|O94901-5|SUN1_HUMAN Isoform 5 of SUN domain-containing protein 1 OS=Homo sapiens GN=SUN1;>sp|O94901-8|SUN1_HUMAN Isoform 8 of SUN domain-containing protein 1 OS=Hom	21	7	7	7	14.3	14.3	14.3	90.063	812	812;702;785;822;974;682;710;634;341;257;278;427;583;171;174;88;109;113;119;135;158	NaN	NaN	NaN	NaN	NaN	NaN	NaN	NaN	NaN	NaN	NaN	NaN	NaN	NaN	NaN	NaN	NaN	NaN	NaN	NaN	NaN	NaN	NaN	NaN	NaN	NaN	NaN	NaN	NaN	NaN	NaN	NaN
A5D8V6;F5H4Q5	A5D8V6;F5H4Q5	2;2	2;2	2;2	Vacuolar protein sorting-associated protein 37C	VPS37C	>sp|A5D8V6|VP37C_HUMAN Vacuolar protein sorting-associated protein 37C OS=Homo sapiens GN=VPS37C PE=1 SV=2;>tr|F5H4Q5|F5H4Q5_HUMAN Vacuolar protein sorting-associated protein 37C (Fragment) OS=Homo sapiens GN=VPS37C PE=2 SV=1	2	2	2	2	6.5	6.5	6.5	38.658	355	355;148	NaN	NaN	NaN	NaN	NaN	NaN	NaN	NaN	NaN	NaN	NaN	NaN	NaN	NaN	NaN	NaN	NaN	NaN	NaN	NaN	NaN	NaN	NaN	NaN	NaN	NaN	NaN	NaN	NaN	NaN	NaN	NaN
A5PLN9;A5PLN9-2;A5PLN9-4;A5PLN9-5;F5GXC3	A5PLN9;A5PLN9-2;A5PLN9-4;A5PLN9-5;F5GXC3	3;3;3;3;3	3;3;3;3;3	1;1;1;1;1	Trafficking protein particle complex subunit 13	TRAPPC13	>sp|A5PLN9|CE044_HUMAN UPF0533 protein C5orf44 OS=Homo sapiens GN=C5orf44 PE=2 SV=2;>sp|A5PLN9-2|CE044_HUMAN Isoform 2 of UPF0533 protein C5orf44 OS=Homo sapiens GN=C5orf44;>sp|A5PLN9-4|CE044_HUMAN Isoform 3 of UPF0533 protein C5orf44 OS=Homo sapiens GN=C5	5	3	3	1	11.3	11.3	5	46.523	417	417;411;412;418;419	NaN	NaN	NaN	NaN	NaN	NaN	NaN	NaN	NaN	NaN	NaN	NaN	NaN	NaN	NaN	NaN	NaN	NaN	NaN	NaN	NaN	NaN	NaN	NaN	NaN	NaN	NaN	NaN	NaN	NaN	NaN	NaN
A5YKK6;A5YKK6-2;A5YKK6-3;B5MDN3;H3BMZ2;H3BNB1;H3BVC9;H3BMH0;H3BTH2;H3BR89;H3BT18;H3BU44	A5YKK6;A5YKK6-2;A5YKK6-3;B5MDN3	49;48;45;27;10;4;4;3;2;2;1;1	49;48;45;27;10;4;4;3;2;2;1;1	20;20;17;20;10;0;0;0;0;0;0;0	CCR4-NOT transcription complex subunit 1	CNOT1	>sp|A5YKK6|CNOT1_HUMAN CCR4-NOT transcription complex subunit 1 OS=Homo sapiens GN=CNOT1 PE=1 SV=2;>sp|A5YKK6-2|CNOT1_HUMAN Isoform 2 of CCR4-NOT transcription complex subunit 1 OS=Homo sapiens GN=CNOT1;>sp|A5YKK6-3|CNOT1_HUMAN Isoform 3 of CCR4-NOT transc	12	49	49	20	28.1	28.1	11.2	266.94	2376	2376;2371;2150;1227;439;185;241;277;68;193;62;96	0.965	1.0308	1.1882	1.0875	1.2219	1.1435	1.0558	1.0996	1.1318	0.95021	1.0831	1.0201	1.024	1.1404	1.242	0.91497	1.1474	1.0224	1.0275	1.1473	1.2525	1.3304	1.3334	1.1989	1.0236	1.3158	1.1175	1.2197	1.1966	1.0619	1.4052	1.339
A6NCC9;C9JJV1;Q9Y5U2-2;Q9Y5U2;E9PME3;C9JHT9;E9PL88;C9JDU0	A6NCC9;C9JJV1;Q9Y5U2-2;Q9Y5U2;E9PME3;C9JHT9	3;3;3;2;2;2;1;1	3;3;3;2;2;2;1;1	3;3;3;2;2;2;1;1	Protein TSSC4	TSSC4	>tr|A6NCC9|A6NCC9_HUMAN Protein TSSC4 OS=Homo sapiens GN=TSSC4 PE=2 SV=1;>tr|C9JJV1|C9JJV1_HUMAN Protein TSSC4 (Fragment) OS=Homo sapiens GN=TSSC4 PE=2 SV=1;>sp|Q9Y5U2-2|TSSC4_HUMAN Isoform 2 of Protein TSSC4 OS=Homo sapiens GN=TSSC4;>sp|Q9Y5U2|TSSC4_HUMAN	8	3	3	3	39.4	39.4	39.4	13.847	127	127;208;265;329;191;203;110;112	NaN	NaN	NaN	NaN	NaN	NaN	NaN	NaN	NaN	NaN	NaN	NaN	NaN	NaN	NaN	NaN	NaN	NaN	NaN	NaN	NaN	NaN	NaN	NaN	NaN	NaN	NaN	NaN	NaN	NaN	NaN	NaN
Q9GZQ8;A6NCE7;H3BTL1	Q9GZQ8;A6NCE7;H3BTL1	1;1;1	1;1;1	1;1;1	Microtubule-associated proteins 1A/1B light chain 3B;Microtubule-associated proteins 1A/1B light chain 3 beta 2	MAP1LC3B;MAP1LC3B2	>sp|Q9GZQ8|MLP3B_HUMAN Microtubule-associated proteins 1A/1B light chain 3B OS=Homo sapiens GN=MAP1LC3B PE=1 SV=3;>sp|A6NCE7|MP3B2_HUMAN Microtubule-associated proteins 1A/1B light chain 3 beta 2 OS=Homo sapiens GN=MAP1LC3B2 PE=2 SV=1;>tr|H3BTL1|H3BTL1_HUM	3	1	1	1	11.2	11.2	11.2	14.688	125	125;125;75	NaN	NaN	NaN	NaN	NaN	NaN	NaN	NaN	NaN	NaN	NaN	NaN	NaN	NaN	NaN	NaN	NaN	NaN	NaN	NaN	NaN	NaN	NaN	NaN	NaN	NaN	NaN	NaN	NaN	NaN	NaN	1.1809
J3KPP0;Q9Y6G3;A6NCI0	J3KPP0;Q9Y6G3;A6NCI0	1;1;1	1;1;1	1;1;1	39S ribosomal protein L42, mitochondrial	MRPL42	>tr|J3KPP0|J3KPP0_HUMAN 39S ribosomal protein L42, mitochondrial OS=Homo sapiens GN=MRPL42 PE=4 SV=1;>sp|Q9Y6G3|RM42_HUMAN 39S ribosomal protein L42, mitochondrial OS=Homo sapiens GN=MRPL42 PE=1 SV=1;>tr|A6NCI0|A6NCI0_HUMAN 39S ribosomal protein L42, mitoc	3	1	1	1	10.8	10.8	10.8	16.204	139	139;142;142	NaN	NaN	NaN	NaN	NaN	NaN	NaN	NaN	NaN	NaN	NaN	NaN	NaN	NaN	NaN	NaN	NaN	NaN	NaN	NaN	NaN	NaN	NaN	NaN	NaN	NaN	NaN	NaN	NaN	NaN	NaN	NaN
Q13564;Q13564-2;A6NCK0;A8MU28;J3QRA5;H3BMR3;J3KRK3;J3QLH4;J3KTE3;H3BSS8	Q13564;Q13564-2;A6NCK0;A8MU28	16;16;16;15;5;4;3;2;2;1	16;16;16;15;5;4;3;2;2;1	16;16;16;15;5;4;3;2;2;1	NEDD8-activating enzyme E1 regulatory subunit	NAE1	>sp|Q13564|ULA1_HUMAN NEDD8-activating enzyme E1 regulatory subunit OS=Homo sapiens GN=NAE1 PE=1 SV=1;>sp|Q13564-2|ULA1_HUMAN Isoform 2 of NEDD8-activating enzyme E1 regulatory subunit OS=Homo sapiens GN=NAE1;>tr|A6NCK0|A6NCK0_HUMAN NEDD8-activating enzyme	10	16	16	16	43.3	43.3	43.3	60.246	534	534;528;537;445;124;109;162;112;130;85	0.92929	0.99793	1.1602	1.0694	1.0751	1.0678	1.1023	1.0088	1.216	1.0624	1.0729	1.1326	1.0282	1.1526	1.2175	1.0562	1.1127	1.1548	1.0818	1.2397	0.99474	1.0063	1.0904	1.0622	0.78253	1.0365	1.1053	1.069	0.99975	0.98471	1.1916	1.0495
P79522-2;P79522;A6NDA2	P79522-2;P79522;A6NDA2	1;1;1	1;1;1	1;1;1	Proline-rich protein 3	PRR3	>sp|P79522-2|PRR3_HUMAN Isoform 2 of Proline-rich protein 3 OS=Homo sapiens GN=PRR3;>sp|P79522|PRR3_HUMAN Proline-rich protein 3 OS=Homo sapiens GN=PRR3 PE=2 SV=2;>tr|A6NDA2|A6NDA2_HUMAN Proline-rich protein 3 OS=Homo sapiens GN=PRR3 PE=2 SV=2	3	1	1	1	9	9	9	18.644	167	167;188;253	NaN	NaN	NaN	NaN	NaN	NaN	NaN	NaN	NaN	NaN	NaN	NaN	NaN	NaN	NaN	NaN	NaN	NaN	NaN	NaN	NaN	NaN	NaN	NaN	NaN	NaN	NaN	NaN	NaN	NaN	NaN	NaN
A6NDG6;H3BV17	A6NDG6	10;1	10;1	10;1	Phosphoglycolate phosphatase	PGP	>sp|A6NDG6|PGP_HUMAN Phosphoglycolate phosphatase OS=Homo sapiens GN=PGP PE=1 SV=1	2	10	10	10	37.7	37.7	37.7	34.006	321	321;57	0.94096	1.0496	1.1464	1.088	1.2248	1.059	1.1329	0.9981	1.0859	1.1283	1.1057	1.0797	1.0191	1.1512	1.197	1.1016	1.0522	1.0681	1.066	1.0914	1.1156	1.0755	1.1322	1.1191	0.83201	1.0628	1.265	1.0783	1.1363	0.86593	1.1269	1.084
Q86YS6;A6NDJ8	Q86YS6;A6NDJ8	2;2	2;2	2;2	Ras-related protein Rab-43;Putative Rab-43-like protein ENSP00000330714	RAB43	>sp|Q86YS6|RAB43_HUMAN Ras-related protein Rab-43 OS=Homo sapiens GN=RAB43 PE=1 SV=1;>sp|A6NDJ8|RB43L_HUMAN Putative Rab-43-like protein ENSP00000330714 OS=Homo sapiens PE=5 SV=3	2	2	2	2	11.8	11.8	11.8	23.339	212	212;181	NaN	NaN	NaN	NaN	NaN	NaN	NaN	NaN	NaN	NaN	NaN	NaN	NaN	NaN	NaN	NaN	NaN	NaN	NaN	NaN	NaN	NaN	NaN	1.3824	NaN	0.92571	NaN	NaN	NaN	NaN	NaN	NaN
A6NDU8	A6NDU8	10	10	10	UPF0600 protein C5orf51	C5orf51	>sp|A6NDU8|CE051_HUMAN UPF0600 protein C5orf51 OS=Homo sapiens GN=C5orf51 PE=1 SV=1	1	10	10	10	48.6	48.6	48.6	33.62	294	294	NaN	0.97445	NaN	0.9203	1.1312	1.0527	1.0737	0.86792	0.86798	0.97273	0.94415	NaN	0.96924	1.1227	1.2582	0.99515	NaN	1.1488	NaN	1.2275	1.0479	NaN	NaN	NaN	NaN	1.1804	NaN	1.8049	0.96474	1.1261	NaN	1.2652
A6NED2;G3V2I3;G3V3Q4	A6NED2;G3V2I3	4;3;1	4;3;1	4;3;1	RCC1 domain-containing protein 1	RCCD1	>sp|A6NED2|RCCD1_HUMAN RCC1 domain-containing protein 1 OS=Homo sapiens GN=RCCD1 PE=1 SV=1;>tr|G3V2I3|G3V2I3_HUMAN RCC1 domain-containing protein 1 OS=Homo sapiens GN=RCCD1 PE=2 SV=1	3	4	4	4	13.3	13.3	13.3	40.078	376	376;374;78	NaN	NaN	NaN	NaN	NaN	NaN	NaN	NaN	NaN	NaN	NaN	NaN	NaN	NaN	NaN	NaN	NaN	NaN	NaN	NaN	NaN	1.4969	1.6595	NaN	NaN	NaN	NaN	NaN	NaN	NaN	NaN	NaN
P51610;P51610-2;A6NEM2;P51610-3;H7C1C4	P51610;P51610-2;A6NEM2	36;36;36;13;11	36;36;36;13;11	35;35;35;13;10	Host cell factor 1;HCF N-terminal chain 1;HCF N-terminal chain 2;HCF N-terminal chain 3;HCF N-terminal chain 4;HCF N-terminal chain 5;HCF N-terminal chain 6;HCF C-terminal chain 1;HCF C-terminal chain 2;HCF C-terminal chain 3;HCF C-terminal chain 4;HCF C-terminal chain 5;HCF C-terminal chain 6	HCFC1	>sp|P51610|HCFC1_HUMAN Host cell factor 1 OS=Homo sapiens GN=HCFC1 PE=1 SV=2;>sp|P51610-2|HCFC1_HUMAN Isoform 2 of Host cell factor 1 OS=Homo sapiens GN=HCFC1;>tr|A6NEM2|A6NEM2_HUMAN HCF N-terminal chain 5 OS=Homo sapiens GN=HCFC1 PE=2 SV=2	5	36	36	35	25.2	25.2	24.8	208.73	2035	2035;1966;2080;428;611	1.0312	1.0326	1.2114	0.98773	0.94057	1.0423	1.1711	1.3005	1.1451	1.193	1.1666	1.1986	1.078	1.1675	1.0906	1.2655	1.1032	1.3045	0.9394	1.3817	1.1701	1.1213	1.2029	1.1607	0.82339	1.2536	1.2976	1.2647	1.2269	1.1229	1.3194	1.3491
Q9Y2X9;A6NF48	Q9Y2X9;A6NF48	2;2	2;2	2;2	Zinc finger protein 281	ZNF281	>sp|Q9Y2X9|ZN281_HUMAN Zinc finger protein 281 OS=Homo sapiens GN=ZNF281 PE=1 SV=1;>tr|A6NF48|A6NF48_HUMAN Zinc finger protein 281 OS=Homo sapiens GN=ZNF281 PE=2 SV=1	2	2	2	2	3	3	3	96.914	895	895;859	NaN	NaN	NaN	NaN	NaN	NaN	NaN	NaN	NaN	NaN	NaN	NaN	NaN	NaN	NaN	NaN	NaN	NaN	NaN	NaN	NaN	NaN	NaN	NaN	NaN	NaN	NaN	NaN	NaN	NaN	NaN	NaN
A6NFI3	A6NFI3	1	1	1	Zinc finger protein 316	ZNF316	>sp|A6NFI3|ZN316_HUMAN Zinc finger protein 316 OS=Homo sapiens GN=ZNF316 PE=1 SV=1	1	1	1	1	2.3	2.3	2.3	108.44	1004	1004	NaN	NaN	NaN	NaN	NaN	NaN	NaN	NaN	NaN	NaN	NaN	NaN	NaN	NaN	NaN	NaN	NaN	NaN	NaN	NaN	NaN	NaN	NaN	NaN	NaN	NaN	NaN	NaN	NaN	NaN	NaN	NaN
Q8IZP0;Q8IZP0-3;Q8IZP0-2;Q8IZP0-10;Q8IZP0-8;F5H1G9;Q8IZP0-7;F8WA55;Q8IZP0-4;Q8IZP0-5;Q8IZP0-6;Q8IZP0-9;F8WA56;A6NFN2;Q8IZP0-12;Q8IZP0-11;F8WAL6	Q8IZP0;Q8IZP0-3;Q8IZP0-2;Q8IZP0-10;Q8IZP0-8;F5H1G9;Q8IZP0-7;F8WA55;Q8IZP0-4;Q8IZP0-5;Q8IZP0-6;Q8IZP0-9;F8WA56;A6NFN2;Q8IZP0-12;Q8IZP0-11	10;10;10;10;10;10;10;10;10;10;10;10;10;10;9;6;1	10;10;10;10;10;10;10;10;10;10;10;10;10;10;9;6;1	6;6;6;6;6;6;6;6;6;6;6;6;6;6;5;5;0	Abl interactor 1	ABI1	>sp|Q8IZP0|ABI1_HUMAN Abl interactor 1 OS=Homo sapiens GN=ABI1 PE=1 SV=4;>sp|Q8IZP0-3|ABI1_HUMAN Isoform 3 of Abl interactor 1 OS=Homo sapiens GN=ABI1;>sp|Q8IZP0-2|ABI1_HUMAN Isoform 2 of Abl interactor 1 OS=Homo sapiens GN=ABI1;>sp|Q8IZP0-10|ABI1_HUMAN Is	17	10	10	6	24.2	24.2	17.3	55.08	508	508;452;446;388;393;394;422;423;451;476;480;481;482;509;496;329;299	NaN	0.93984	0.89028	0.8151	0.8975	NaN	NaN	1.2792	NaN	NaN	NaN	NaN	NaN	0.98975	NaN	NaN	0.82826	NaN	0.8993	1.5663	NaN	0.60863	1.0475	NaN	1.0121	NaN	1.0159	1.0103	0.89247	0.96624	1.0175	1.0208
Q92599;Q92599-2;A6NMH6;A6NFQ9;F6W7K9;F8W8I8;Q92599-3;C9JV02;C9J4G8;H7C604	Q92599;Q92599-2;A6NMH6;A6NFQ9;F6W7K9;F8W8I8;Q92599-3	8;8;8;8;8;8;6;3;2;1	5;5;5;5;5;5;3;2;2;1	5;5;5;5;5;5;3;2;2;1	Septin-8	2008-09-01	>sp|Q92599|SEPT8_HUMAN Septin-8 OS=Homo sapiens GN=SEPT8 PE=1 SV=4;>sp|Q92599-2|SEPT8_HUMAN Isoform 2 of Septin-8 OS=Homo sapiens GN=SEPT8;>tr|A6NMH6|A6NMH6_HUMAN Septin-8 OS=Homo sapiens GN=SEPT8 PE=2 SV=1;>tr|A6NFQ9|A6NFQ9_HUMAN Septin-8 OS=Homo sapiens	10	8	5	5	22.6	15.5	15.5	55.756	483	483;429;430;440;442;460;369;130;97;79	NaN	NaN	1.0747	0.85183	1.2054	NaN	NaN	1.1313	NaN	NaN	NaN	NaN	NaN	NaN	1.0095	NaN	NaN	NaN	NaN	NaN	NaN	NaN	NaN	NaN	NaN	NaN	NaN	NaN	NaN	NaN	NaN	NaN
Q9UKK9;A6NFX8;A6NCQ0;A6NJU6;A6NHE8;H0YEY4;C9JYY9	Q9UKK9;A6NFX8;A6NCQ0;A6NJU6;A6NHE8	10;10;7;7;7;4;3	10;10;7;7;7;4;3	10;10;7;7;7;4;3	ADP-sugar pyrophosphatase	NUDT5	>sp|Q9UKK9|NUDT5_HUMAN ADP-sugar pyrophosphatase OS=Homo sapiens GN=NUDT5 PE=1 SV=1;>tr|A6NFX8|A6NFX8_HUMAN ADP-sugar pyrophosphatase OS=Homo sapiens GN=NUDT5 PE=2 SV=1;>tr|A6NCQ0|A6NCQ0_HUMAN ADP-sugar pyrophosphatase OS=Homo sapiens GN=NUDT5 PE=2 SV=1;>t	7	10	10	10	56.6	56.6	56.6	24.327	219	219;232;180;186;189;137;98	0.94232	1.1869	1.1524	1.1447	1.168	1.1457	1.115	1.0734	1.2156	1.1166	1.2254	1.1498	1.176	1.191	1.3719	1.0753	1.1902	1.0892	1.0293	1.2712	1.1173	1.2025	1.1915	1.1588	0.93213	1.291	1.2119	1.1855	1.2489	1.0774	1.1999	1.1027
Q969T9;K7EIJ0;K7ENL2;A6NG10;K7EMC9;B4DFG2;K7EIN1;K7ESN4;K7EIK1	Q969T9;K7EIJ0;K7ENL2;A6NG10;K7EMC9;B4DFG2;K7EIN1;K7ESN4	6;6;6;6;6;5;3;3;1	6;6;6;6;6;5;3;3;1	6;6;6;6;6;5;3;3;1	WW domain-binding protein 2	WBP2	>sp|Q969T9|WBP2_HUMAN WW domain-binding protein 2 OS=Homo sapiens GN=WBP2 PE=1 SV=1;>tr|K7EIJ0|K7EIJ0_HUMAN WW domain-binding protein 2 (Fragment) OS=Homo sapiens GN=WBP2 PE=4 SV=1;>tr|K7ENL2|K7ENL2_HUMAN WW domain-binding protein 2 OS=Homo sapiens GN=WBP2	9	6	6	6	19.5	19.5	19.5	28.087	261	261;167;231;239;257;216;114;152;205	NaN	NaN	NaN	NaN	NaN	NaN	NaN	NaN	NaN	NaN	NaN	0.93746	1.2068	NaN	NaN	NaN	NaN	NaN	NaN	NaN	NaN	NaN	NaN	NaN	0.89181	NaN	NaN	NaN	NaN	NaN	NaN	NaN
Q92733;A6NG79;H0YE12;H0Y679	Q92733;A6NG79;H0YE12;H0Y679	6;6;3;3	6;6;3;3	6;6;3;3	Proline-rich protein PRCC	PRCC	>sp|Q92733|PRCC_HUMAN Proline-rich protein PRCC OS=Homo sapiens GN=PRCC PE=1 SV=1;>tr|A6NG79|A6NG79_HUMAN Proline-rich protein PRCC OS=Homo sapiens GN=PRCC PE=2 SV=1;>tr|H0YE12|H0YE12_HUMAN Proline-rich protein PRCC (Fragment) OS=Homo sapiens GN=PRCC PE=2	4	6	6	6	17.5	17.5	17.5	52.417	491	491;459;198;257	NaN	1.0801	NaN	NaN	NaN	1.2647	1.0679	NaN	NaN	NaN	NaN	NaN	NaN	1.2239	0.98475	NaN	1.1415	NaN	NaN	1.0678	NaN	1.7866	NaN	NaN	2.0146	NaN	NaN	NaN	NaN	1.4799	1.199	NaN
P51808;A6NGJ0;F2Z328	P51808;A6NGJ0;F2Z328	4;4;3	4;4;3	4;4;3	Dynein light chain Tctex-type 3	DYNLT3	>sp|P51808|DYLT3_HUMAN Dynein light chain Tctex-type 3 OS=Homo sapiens GN=DYNLT3 PE=1 SV=1;>tr|A6NGJ0|A6NGJ0_HUMAN Dynein light chain Tctex-type 3 OS=Homo sapiens GN=DYNLT3 PE=2 SV=1;>tr|F2Z328|F2Z328_HUMAN Dynein light chain Tctex-type 3 OS=Homo sapiens G	3	4	4	4	73.3	73.3	73.3	13.062	116	116;152;122	NaN	NaN	NaN	NaN	NaN	NaN	NaN	NaN	NaN	NaN	NaN	NaN	NaN	NaN	NaN	NaN	NaN	NaN	NaN	NaN	NaN	NaN	0.74647	NaN	1.1477	NaN	NaN	NaN	NaN	NaN	NaN	NaN
O95070;E9PIZ0;C9JST7;A6NGW1;F8W9A1	O95070;E9PIZ0;C9JST7;A6NGW1;F8W9A1	2;2;2;2;1	2;2;2;2;1	2;2;2;2;1	Protein YIF1A	YIF1A	>sp|O95070|YIF1A_HUMAN Protein YIF1A OS=Homo sapiens GN=YIF1A PE=1 SV=2;>tr|E9PIZ0|E9PIZ0_HUMAN Protein YIF1A (Fragment) OS=Homo sapiens GN=YIF1A PE=2 SV=1;>tr|C9JST7|C9JST7_HUMAN Protein YIF1A (Fragment) OS=Homo sapiens GN=YIF1A PE=2 SV=2;>tr|A6NGW1|A6NGW	5	2	2	2	10.9	10.9	10.9	32.011	293	293;160;199;241;297	NaN	NaN	NaN	NaN	NaN	NaN	NaN	NaN	NaN	NaN	NaN	NaN	NaN	NaN	NaN	NaN	NaN	NaN	NaN	NaN	NaN	NaN	NaN	NaN	NaN	NaN	NaN	NaN	NaN	NaN	NaN	NaN
Q14202;A6NHN7;Q14202-2;A6NHB5;Q14202-3;A6NL54	Q14202;A6NHN7;Q14202-2;A6NHB5	4;4;4;4;1;1	4;4;4;4;1;1	4;4;4;4;1;1	Zinc finger MYM-type protein 3	ZMYM3	>sp|Q14202|ZMYM3_HUMAN Zinc finger MYM-type protein 3 OS=Homo sapiens GN=ZMYM3 PE=1 SV=2;>tr|A6NHN7|A6NHN7_HUMAN Zinc finger MYM-type protein 3 OS=Homo sapiens GN=ZMYM3 PE=2 SV=1;>sp|Q14202-2|ZMYM3_HUMAN Isoform 2 of Zinc finger MYM-type protein 3 OS=Homo	6	4	4	4	3.9	3.9	3.9	152.38	1370	1370;1280;1358;1372;495;497	NaN	NaN	NaN	NaN	NaN	NaN	NaN	NaN	NaN	NaN	NaN	NaN	NaN	NaN	NaN	NaN	NaN	NaN	NaN	NaN	NaN	NaN	NaN	NaN	NaN	NaN	NaN	NaN	NaN	NaN	NaN	NaN
A6NHL2-2;A6NHL2	A6NHL2-2;A6NHL2	7;7	3;3	3;3	Tubulin alpha chain-like 3	TUBAL3	>sp|A6NHL2-2|TBAL3_HUMAN Isoform 2 of Tubulin alpha chain-like 3 OS=Homo sapiens GN=TUBAL3;>sp|A6NHL2|TBAL3_HUMAN Tubulin alpha chain-like 3 OS=Homo sapiens GN=TUBAL3 PE=1 SV=2	2	7	3	3	18	10.8	10.8	45.517	406	406;446	NaN	NaN	NaN	NaN	NaN	NaN	NaN	NaN	NaN	NaN	NaN	NaN	NaN	NaN	NaN	NaN	NaN	NaN	NaN	NaN	NaN	NaN	NaN	NaN	NaN	NaN	NaN	NaN	NaN	NaN	NaN	NaN
A6NHQ2	A6NHQ2	4	2	2	rRNA/tRNA 2-O-methyltransferase fibrillarin-like protein 1	FBLL1	>sp|A6NHQ2|FBLL1_HUMAN rRNA/tRNA 2-O-methyltransferase fibrillarin-like protein 1 OS=Homo sapiens GN=FBLL1 PE=1 SV=1	1	4	2	2	11.4	3.6	3.6	34.675	333	333	NaN	NaN	NaN	NaN	NaN	NaN	NaN	0.75175	0.94029	NaN	NaN	NaN	NaN	NaN	NaN	NaN	NaN	NaN	NaN	NaN	NaN	NaN	NaN	NaN	NaN	1.1699	NaN	NaN	NaN	NaN	NaN	NaN
A6NHR9;A6NHR9-2;J3KTL8;A6NHR9-3;J3QSH1;J3KRK8	A6NHR9;A6NHR9-2;J3KTL8	46;45;27;18;2;1	46;45;27;18;2;1	46;45;27;18;2;1	Structural maintenance of chromosomes flexible hinge domain-containing protein 1	SMCHD1	>sp|A6NHR9|SMHD1_HUMAN Structural maintenance of chromosomes flexible hinge domain-containing protein 1 OS=Homo sapiens GN=SMCHD1 PE=1 SV=2;>sp|A6NHR9-2|SMHD1_HUMAN Isoform 2 of Structural maintenance of chromosomes flexible hinge domain-containing protein	6	46	46	46	28.7	28.7	28.7	226.37	2005	2005;1917;1388;762;150;49	0.95595	0.97235	1.0865	1.0115	1.1182	1.0803	1.1831	1.107	1.0702	1.0883	1.0633	1.0074	1.0053	1.0395	1.1854	1.0423	0.95236	1.1036	0.93023	1.088	1.0599	1.096	1.2511	1.0348	0.91159	1.0458	1.1224	1.0205	1.097	1.0644	1.1689	1.1328
P63092;Q5JWF2;A6NI00;Q5JWF2-2;P63092-3;P63092-2;P38405;P38405-2;Q5JWE9;H0Y7F4;Q5JWD1;H0Y7E8	P63092;Q5JWF2;A6NI00;Q5JWF2-2;P63092-3;P63092-2	15;15;15;14;14;14;5;5;3;3;2;2	14;14;14;13;13;13;4;4;2;2;1;1	10;10;10;9;9;9;0;0;2;2;1;1	Guanine nucleotide-binding protein G(s) subunit alpha isoforms short;Guanine nucleotide-binding protein G(s) subunit alpha isoforms XLas	GNAS	>sp|P63092|GNAS2_HUMAN Guanine nucleotide-binding protein G(s) subunit alpha isoforms short OS=Homo sapiens GN=GNAS PE=1 SV=1;>sp|Q5JWF2|GNAS1_HUMAN Guanine nucleotide-binding protein G(s) subunit alpha isoforms XLas OS=Homo sapiens GN=GNAS PE=1 SV=2;>tr|A	12	15	14	10	42.6	39.8	31.5	45.664	394	394;1037;395;1023;379;380;381;458;193;199;87;93	0.93963	1.0982	1.0932	1.1493	1.2355	0.9133	1.0953	1.0379	1.3298	1.1855	1.1211	0.99596	1.065	1.1306	0.85658	1.1414	1.0305	1.2393	1.1094	1.1431	0.99161	1.1733	0.93351	0.78439	0.89431	1.1432	0.97313	1.2997	1.0179	1.0804	1.1651	0.90752
A6NIH7	A6NIH7	4	4	4	Protein unc-119 homolog B	UNC119B	>sp|A6NIH7|U119B_HUMAN Protein unc-119 homolog B OS=Homo sapiens GN=UNC119B PE=1 SV=1	1	4	4	4	27.1	27.1	27.1	28.136	251	251	1.0876	NaN	1.1608	NaN	0.93832	NaN	NaN	NaN	1.1146	NaN	NaN	NaN	NaN	NaN	NaN	NaN	NaN	1.1477	NaN	NaN	NaN	NaN	NaN	NaN	NaN	NaN	NaN	NaN	NaN	NaN	NaN	NaN
A6NJ78;A6NJ78-2;P0C7V9;A6NJ78-4	A6NJ78;A6NJ78-2	4;2;1;1	4;2;1;1	4;2;1;1	Probable methyltransferase-like protein 15	METTL15	>sp|A6NJ78|MET15_HUMAN Probable methyltransferase-like protein 15 OS=Homo sapiens GN=METTL15 PE=2 SV=1;>sp|A6NJ78-2|MET15_HUMAN Isoform 2 of Probable methyltransferase-like protein 15 OS=Homo sapiens GN=METTL15	4	4	4	4	13	13	13	46.121	407	407;273;234;279	NaN	NaN	NaN	NaN	NaN	NaN	NaN	NaN	NaN	NaN	NaN	NaN	NaN	NaN	NaN	NaN	NaN	NaN	NaN	NaN	NaN	NaN	NaN	NaN	NaN	NaN	NaN	NaN	NaN	NaN	NaN	NaN
Q8WTT2;A6NJZ9;F5H677	Q8WTT2;A6NJZ9;F5H677	6;6;3	6;6;3	6;6;3	Nucleolar complex protein 3 homolog	NOC3L	>sp|Q8WTT2|NOC3L_HUMAN Nucleolar complex protein 3 homolog OS=Homo sapiens GN=NOC3L PE=1 SV=1;>tr|A6NJZ9|A6NJZ9_HUMAN Nucleolar complex protein 3 homolog OS=Homo sapiens GN=NOC3L PE=2 SV=1;>tr|F5H677|F5H677_HUMAN Nucleolar complex protein 3 homolog OS=Homo	3	6	6	6	10.5	10.5	10.5	92.547	800	800;800;501	NaN	NaN	NaN	NaN	NaN	NaN	NaN	NaN	NaN	NaN	NaN	NaN	NaN	NaN	NaN	NaN	NaN	NaN	NaN	NaN	NaN	NaN	NaN	NaN	NaN	NaN	NaN	NaN	NaN	NaN	NaN	NaN
A6NKT7;J3KNE0;Q7Z3J3;J3KNY6;H0YBN8;Q7Z3J3-2;H7BZ48	A6NKT7;J3KNE0;Q7Z3J3;J3KNY6	30;30;28;28;4;4;1	2;2;2;2;0;0;0	1;1;1;1;0;0;0	RanBP2-like and GRIP domain-containing protein 3;RanBP2-like and GRIP domain-containing protein 4	RGPD3;RGPD4	>sp|A6NKT7|RGPD3_HUMAN RanBP2-like and GRIP domain-containing protein 3 OS=Homo sapiens GN=RGPD3 PE=2 SV=2;>tr|J3KNE0|J3KNE0_HUMAN RanBP2-like and GRIP domain-containing protein 3 OS=Homo sapiens GN=RGPD3 PE=4 SV=1;>sp|Q7Z3J3|RGPD4_HUMAN RanBP2-like and GR	7	30	2	1	20.4	1.3	0.7	197.48	1758	1758;1766;1758;1766;98;155;202	NaN	NaN	NaN	NaN	NaN	NaN	NaN	NaN	NaN	NaN	NaN	NaN	NaN	NaN	NaN	NaN	NaN	NaN	NaN	NaN	NaN	NaN	NaN	NaN	NaN	NaN	NaN	NaN	NaN	NaN	NaN	NaN
A6NKV8;Q9H074;Q9H074-2;D6REB4;D6RJF2;D6RJ02;D6RD97;D6R9H8	A6NKV8;Q9H074;Q9H074-2;D6REB4	10;9;9;7;3;2;1;1	10;9;9;7;3;2;1;1	10;9;9;7;3;2;1;1	Polyadenylate-binding protein-interacting protein 1	PAIP1	>tr|A6NKV8|A6NKV8_HUMAN Polyadenylate-binding protein-interacting protein 1 OS=Homo sapiens GN=PAIP1 PE=2 SV=1;>sp|Q9H074|PAIP1_HUMAN Polyadenylate-binding protein-interacting protein 1 OS=Homo sapiens GN=PAIP1 PE=1 SV=1;>sp|Q9H074-2|PAIP1_HUMAN Isoform 2	8	10	10	10	37.9	37.9	37.9	42.006	367	367;479;400;351;200;168;95;266	0.92579	1.1494	1.2123	1.0216	1.1723	1.0634	1.2061	1.2095	1.0809	1.0934	1.1606	1.0198	1.1309	1.3874	1.3375	1.0762	1.0945	1.2207	1.158	1.2798	1.0694	1.2103	1.3446	1.1007	1.0214	1.0485	1.0841	1.1386	1.1794	1.1057	1.1519	1.1592
A6NLH6;Q9P003	A6NLH6;Q9P003	1;1	1;1	1;1	Protein cornichon homolog 4	CNIH4	>tr|A6NLH6|A6NLH6_HUMAN Protein cornichon homolog 4 OS=Homo sapiens GN=CNIH4 PE=2 SV=1;>sp|Q9P003|CNIH4_HUMAN Protein cornichon homolog 4 OS=Homo sapiens GN=CNIH4 PE=1 SV=1	2	1	1	1	14.6	14.6	14.6	15.771	137	137;139	NaN	NaN	NaN	NaN	NaN	NaN	NaN	NaN	NaN	NaN	NaN	NaN	NaN	NaN	NaN	NaN	NaN	NaN	NaN	NaN	NaN	NaN	NaN	NaN	NaN	NaN	NaN	NaN	NaN	NaN	NaN	NaN
P60033;E9PJK1;E9PRJ8;H0YDL9;H0YDJ9;E9PIF1;A6NMH8;E9PM31;H0YEE2	P60033;E9PJK1;E9PRJ8;H0YDL9;H0YDJ9;E9PIF1;A6NMH8;E9PM31;H0YEE2	2;2;2;2;2;2;2;1;1	2;2;2;2;2;2;2;1;1	2;2;2;2;2;2;2;1;1	CD81 antigen	CD81	>sp|P60033|CD81_HUMAN CD81 antigen OS=Homo sapiens GN=CD81 PE=1 SV=1;>tr|E9PJK1|E9PJK1_HUMAN CD81 antigen OS=Homo sapiens GN=CD81 PE=4 SV=1;>tr|E9PRJ8|E9PRJ8_HUMAN CD81 antigen (Fragment) OS=Homo sapiens GN=CD81 PE=2 SV=1;>tr|H0YDL9|H0YDL9_HUMAN CD81 antig	9	2	2	2	15.3	15.3	15.3	25.809	236	236;165;209;221;225;242;274;93;148	0.67412	NaN	NaN	NaN	NaN	NaN	NaN	NaN	NaN	NaN	NaN	NaN	NaN	NaN	NaN	NaN	NaN	NaN	0.92189	1.0497	1.0994	0.43335	0.98297	NaN	0.81201	1.0605	0.95024	1.023	1.4182	1.1036	0.94328	0.97462
P09884;A6NMQ1	P09884;A6NMQ1	27;27	27;27	27;27	DNA polymerase alpha catalytic subunit;DNA polymerase	POLA1	>sp|P09884|DPOLA_HUMAN DNA polymerase alpha catalytic subunit OS=Homo sapiens GN=POLA1 PE=1 SV=2;>tr|A6NMQ1|A6NMQ1_HUMAN DNA polymerase OS=Homo sapiens GN=POLA1 PE=2 SV=1	2	27	27	27	23.7	23.7	23.7	165.91	1462	1462;1468	0.86756	1.0909	1.5824	0.90093	1.2608	1.1554	0.71789	1.4327	1.2183	0.94837	1.0151	0.96978	1.0646	1.4699	1.3765	1.0182	1.0976	1.0777	0.94532	1.6803	1.2932	1.18	1.4829	1.0998	1.1223	1.0736	0.97978	1.33	0.92565	1.1553	1.176	1.1002
O43768;O43768-2;O43768-9;O43768-3;O43768-4;A6NMQ3;C9JUF4;Q5T5H1;O43768-6;O43768-5;D6RE62;O43768-7;O43768-8	O43768;O43768-2;O43768-9;O43768-3;O43768-4;A6NMQ3;C9JUF4;Q5T5H1;O43768-6;O43768-5;D6RE62;O43768-7;O43768-8	10;10;10;10;10;10;10;10;8;8;8;8;6	10;10;10;10;10;10;10;10;8;8;8;8;6	9;9;9;9;9;9;9;9;7;7;7;7;6	Alpha-endosulfine	ENSA	>sp|O43768|ENSA_HUMAN Alpha-endosulfine OS=Homo sapiens GN=ENSA PE=1 SV=1;>sp|O43768-2|ENSA_HUMAN Isoform 2 of Alpha-endosulfine OS=Homo sapiens GN=ENSA;>sp|O43768-9|ENSA_HUMAN Isoform 9 of Alpha-endosulfine OS=Homo sapiens GN=ENSA;>sp|O43768-3|ENSA_HUMAN	13	10	10	9	75.2	75.2	66.1	13.389	121	121;117;133;137;140;140;144;187;113;117;121;133;105	0.96664	1.3681	1.5876	1.5851	1.7047	1.435	1.3211	1.1751	1.6279	1.5137	1.8508	1.7971	1.9561	1.5214	1.8382	1.3523	1.5364	1.6254	1.1023	1.3906	1.1672	1.1844	1.2378	1.2308	0.97528	1.3187	1.4621	1.6442	1.6352	1.1786	1.3683	1.333
A6NMY6	A6NMY6	22	1	1	Putative annexin A2-like protein	ANXA2P2	>sp|A6NMY6|AXA2L_HUMAN Putative annexin A2-like protein OS=Homo sapiens GN=ANXA2P2 PE=5 SV=2	1	22	1	1	62.5	7.7	7.7	38.659	339	339	NaN	NaN	NaN	NaN	NaN	NaN	NaN	NaN	NaN	NaN	NaN	NaN	NaN	NaN	NaN	NaN	NaN	NaN	NaN	NaN	NaN	NaN	NaN	NaN	NaN	NaN	NaN	NaN	NaN	NaN	NaN	NaN
A6NN80;E5RK69;E5RK63;E5RJF5;E5RFF0;E5RI05;E5RJR0;E5RIU8;H0YC77	A6NN80;E5RK69	43;26;11;10;10;9;7;6;3	43;26;11;10;10;9;7;6;3	1;1;0;0;0;0;0;0;0	Annexin	ANXA6	>tr|A6NN80|A6NN80_HUMAN Annexin OS=Homo sapiens GN=ANXA6 PE=3 SV=3;>tr|E5RK69|E5RK69_HUMAN Annexin OS=Homo sapiens GN=ANXA6 PE=2 SV=1	9	43	43	1	68.1	68.1	2.1	75.276	667	667;460;150;130;156;129;110;94;91	0.93721	0.92793	1.0518	0.99526	1.0848	0.97915	1.0237	0.92573	1.1073	1.0414	1.0974	0.99516	1.0674	1.0745	1.0762	1.0598	0.90178	1.0286	0.99857	0.95378	0.92272	0.97584	0.9754	0.87193	0.80594	1.0157	1.0074	1.0291	0.88421	1.0078	1.0442	1.0633
P21926;A6NNI4;G8JLH6;F5GXT1	P21926;A6NNI4;G8JLH6	3;3;3;1	3;3;3;1	3;3;3;1	CD9 antigen	CD9	>sp|P21926|CD9_HUMAN CD9 antigen OS=Homo sapiens GN=CD9 PE=1 SV=4;>tr|A6NNI4|A6NNI4_HUMAN CD9 antigen OS=Homo sapiens GN=CD9 PE=2 SV=1;>tr|G8JLH6|G8JLH6_HUMAN CD9 antigen (Fragment) OS=Homo sapiens GN=CD9 PE=2 SV=1	4	3	3	3	18	18	18	25.416	228	228;159;228;142	NaN	NaN	NaN	NaN	NaN	NaN	NaN	NaN	NaN	NaN	NaN	NaN	NaN	NaN	NaN	NaN	NaN	NaN	NaN	NaN	NaN	NaN	NaN	NaN	NaN	NaN	NaN	NaN	0.95592	NaN	NaN	NaN
Q15257;Q15257-3;Q15257-2;A6PVN5;Q15257-4;B4DZF8;Q68CR8;Q5T949;Q5T948;A6PVN9;A6PVN6;B7ZBQ0;A6PVN7;A6PVN8;C9IZ76;H0Y6E5;B7ZBP9;B7ZBP7;B4DDQ6	Q15257;Q15257-3;Q15257-2;A6PVN5;Q15257-4;B4DZF8;Q68CR8;Q5T949;Q5T948;A6PVN9	10;10;10;10;8;8;6;6;6;5;4;3;2;2;2;2;1;1;1	10;10;10;10;8;8;6;6;6;5;4;3;2;2;2;2;1;1;1	10;10;10;10;8;8;6;6;6;5;4;3;2;2;2;2;1;1;1	Serine/threonine-protein phosphatase 2A activator	PPP2R4;DKFZp781M17165	>sp|Q15257|PTPA_HUMAN Serine/threonine-protein phosphatase 2A activator OS=Homo sapiens GN=PPP2R4 PE=1 SV=3;>sp|Q15257-3|PTPA_HUMAN Isoform 3 of Serine/threonine-protein phosphatase 2A activator OS=Homo sapiens GN=PPP2R4;>sp|Q15257-2|PTPA_HUMAN Isoform 1 o	19	10	10	10	34.4	34.4	34.4	40.667	358	358;294;323;329;281;374;104;250;254;263;176;61;64;129;132;218;41;77;151	NaN	NaN	1.0067	NaN	0.97823	1.0877	1.2886	1.0205	1.3484	NaN	1.2497	1.5721	NaN	NaN	NaN	NaN	1.1539	1.0857	NaN	0.50145	0.56888	NaN	1.2303	0.56173	NaN	0.52546	NaN	0.49077	NaN	0.40608	NaN	NaN
Q99755;Q99755-3;A6PW57;Q99755-2;Q99755-4;B4DY52;O14986;A6PW58;A2A5X0;B4DIG7;O14986-2	Q99755;Q99755-3;A6PW57;Q99755-2;Q99755-4	9;9;9;8;8;3;1;1;1;1;1	9;9;9;8;8;3;1;1;1;1;1	4;4;4;3;4;1;0;1;1;0;0	Phosphatidylinositol 4-phosphate 5-kinase type-1 alpha	PIP5K1A	>sp|Q99755|PI51A_HUMAN Phosphatidylinositol 4-phosphate 5-kinase type-1 alpha OS=Homo sapiens GN=PIP5K1A PE=1 SV=1;>sp|Q99755-3|PI51A_HUMAN Isoform 3 of Phosphatidylinositol 4-phosphate 5-kinase type-1 alpha OS=Homo sapiens GN=PIP5K1A;>tr|A6PW57|A6PW57_HUM	11	9	9	4	22.6	22.6	12.5	62.633	562	562;549;550;500;522;198;540;86;101;502;549	NaN	1.0869	0.93242	0.96502	0.98041	0.86787	0.95502	NaN	1.114	1.0192	1.0356	0.95133	0.99502	0.97036	0.94391	0.95717	NaN	1.0506	0.8149	NaN	0.70531	0.64764	NaN	0.66333	0.80329	NaN	1.4908	NaN	NaN	NaN	NaN	0.64266
Q8N884;A6PW79;Q8N884-2	Q8N884;A6PW79;Q8N884-2	5;5;4	5;5;4	5;5;4	Cyclic GMP-AMP synthase	MB21D1	>sp|Q8N884|CGAS_HUMAN Cyclic GMP-AMP synthase OS=Homo sapiens GN=MB21D1 PE=1 SV=2;>tr|A6PW79|A6PW79_HUMAN Cyclic GMP-AMP synthase OS=Homo sapiens GN=MB21D1 PE=4 SV=1;>sp|Q8N884-2|CGAS_HUMAN Isoform 2 of Cyclic GMP-AMP synthase OS=Homo sapiens GN=MB21D1	3	5	5	5	12.3	12.3	12.3	58.814	522	522;505;447	NaN	NaN	NaN	NaN	NaN	NaN	NaN	NaN	NaN	NaN	NaN	NaN	NaN	NaN	NaN	NaN	NaN	NaN	NaN	NaN	NaN	NaN	NaN	NaN	NaN	NaN	NaN	NaN	NaN	NaN	NaN	NaN
A6ZKI3;Q17RB0;Q9BWD3	A6ZKI3;Q17RB0;Q9BWD3	2;1;1	2;1;1	2;1;1	Protein FAM127A;Protein FAM127C;Protein FAM127B	FAM127A;FAM127C;FAM127B	>sp|A6ZKI3|F127A_HUMAN Protein FAM127A OS=Homo sapiens GN=FAM127A PE=1 SV=1;>sp|Q17RB0|F127C_HUMAN Protein FAM127C OS=Homo sapiens GN=FAM127C PE=2 SV=1;>sp|Q9BWD3|F127B_HUMAN Protein FAM127B OS=Homo sapiens GN=FAM127B PE=1 SV=3	3	2	2	2	16.8	16.8	16.8	13.171	113	113;113;113	NaN	NaN	NaN	NaN	NaN	NaN	NaN	NaN	NaN	NaN	NaN	NaN	NaN	NaN	NaN	NaN	NaN	NaN	0.90093	NaN	NaN	NaN	NaN	NaN	NaN	NaN	NaN	NaN	NaN	NaN	NaN	NaN
Q9ULV4;A7MAP0;A7MAP1;B4E3S0;H0YHL7;F8W1H8;F8VUX3;F8VSA4;F8VRE9;F8VTT6;F8VVB7;Q6QEF8;F8VV53;Q6QEF8-4;Q6QEF8-3;Q6QEF8-2;J3QLV6;J3KSS5;Q6QEF8-5	Q9ULV4;A7MAP0;A7MAP1;B4E3S0;H0YHL7	22;22;22;20;14;4;4;4;4;4;4;2;2;2;2;2;2;2;2	22;22;22;20;14;4;4;4;4;4;4;2;2;2;2;2;2;2;2	21;21;21;19;13;4;4;4;4;4;4;2;2;2;2;2;2;2;2	Coronin-1C;Coronin	CORO1C	>sp|Q9ULV4|COR1C_HUMAN Coronin-1C OS=Homo sapiens GN=CORO1C PE=1 SV=1;>tr|A7MAP0|A7MAP0_HUMAN Coronin OS=Homo sapiens GN=CORO1C PE=2 SV=1;>tr|A7MAP1|A7MAP1_HUMAN Coronin OS=Homo sapiens GN=CORO1C PE=2 SV=1;>tr|B4E3S0|B4E3S0_HUMAN Coronin OS=Homo sapiens GN	19	22	22	21	48.5	48.5	47	53.248	474	474;480;527;369;165;151;159;162;163;169;181;472;125;237;285;286;432;471;472	1.0044	1.3231	1.2891	1.3008	1.5931	1.1319	1.4792	1.2413	1.3483	1.4511	1.2859	1.5034	1.2895	1.5473	1.4145	1.2823	1.2786	1.2418	0.90464	1.2972	1.1347	1.2386	1.3631	1.2238	0.95787	1.2214	1.1704	1.2186	1.2607	1.1986	1.3596	1.3256
Q15811;Q15811-3;F8W7U0;E7ERJ0;B4DTM2;Q15811-2;Q15811-4;A8CTY3;A8CTX8;E9PD98;A7Y322;A8DCP3;E7ERJ1;CON__ENSEMBL:ENSBTAP00000001528;C9JQZ7;H0Y523	Q15811;Q15811-3;F8W7U0;E7ERJ0;B4DTM2;Q15811-2;Q15811-4;A8CTY3;A8CTX8;E9PD98;A7Y322;A8DCP3;E7ERJ1;CON__ENSEMBL:ENSBTAP00000001528	11;11;11;11;11;11;11;11;11;11;10;9;9;7;3;2	11;11;11;11;11;11;11;11;11;11;10;9;9;7;3;2	10;10;10;10;10;10;10;10;10;10;9;8;8;6;2;2	Intersectin-1	ITSN1	>sp|Q15811|ITSN1_HUMAN Intersectin-1 OS=Homo sapiens GN=ITSN1 PE=1 SV=3;>sp|Q15811-3|ITSN1_HUMAN Isoform 3 of Intersectin-1 OS=Homo sapiens GN=ITSN1;>tr|F8W7U0|F8W7U0_HUMAN Intersectin-1 OS=Homo sapiens GN=ITSN1 PE=2 SV=1;>tr|E7ERJ0|E7ERJ0_HUMAN Intersecti	16	11	11	10	8.6	8.6	8.1	195.42	1721	1721;1144;1149;1178;1215;1220;1650;1660;1716;1721;1015;914;1020;1222;361;260	3.5324	1.0707	1.5747	NaN	NaN	NaN	NaN	NaN	1.0889	NaN	1.1406	1.2331	1.239	1.7191	NaN	1.5591	NaN	NaN	1.0488	1.2642	NaN	0.97179	NaN	1.3316	0.89665	1.1614	NaN	1.0833	NaN	1.0265	NaN	NaN
Q9Y6M4;Q9Y6M4-3;A8K040;Q9Y6M4-2;B4DSH2;P78368;Q9HCP0;K7ESB6;E7EVD0;Q9HCP0-2;H0YBN6	Q9Y6M4;Q9Y6M4-3;A8K040;Q9Y6M4-2;B4DSH2;P78368;Q9HCP0;K7ESB6;E7EVD0;Q9HCP0-2	4;4;4;4;3;2;2;2;2;2;1	4;4;4;4;3;2;2;2;2;2;1	4;4;4;4;3;2;2;2;2;2;1	Casein kinase I isoform gamma-3;Casein kinase I isoform gamma-2;Casein kinase I isoform gamma-1	CSNK1G3;CSNK1G2;CSNK1G1	>sp|Q9Y6M4|KC1G3_HUMAN Casein kinase I isoform gamma-3 OS=Homo sapiens GN=CSNK1G3 PE=1 SV=2;>sp|Q9Y6M4-3|KC1G3_HUMAN Isoform 3 of Casein kinase I isoform gamma-3 OS=Homo sapiens GN=CSNK1G3;>tr|A8K040|A8K040_HUMAN Casein kinase 1, gamma 3, isoform CRA_f OS=	11	4	4	4	10.3	10.3	10.3	51.388	447	447;423;424;455;348;415;422;299;311;393;164	NaN	NaN	NaN	NaN	NaN	NaN	NaN	NaN	NaN	NaN	NaN	NaN	NaN	NaN	NaN	NaN	NaN	NaN	NaN	NaN	NaN	NaN	NaN	NaN	NaN	NaN	1.4168	NaN	NaN	NaN	NaN	NaN
A8MQB8;Q06787-8;G3V0J0;Q06787-2;G8JL90;Q06787;Q06787-6;Q06787-4;Q06787-5;Q06787-7;Q06787-3;G8JLE9;Q8IXW7;F8W871	A8MQB8;Q06787-8;G3V0J0;Q06787-2;G8JL90;Q06787;Q06787-6;Q06787-4;Q06787-5;Q06787-7;Q06787-3;G8JLE9;Q8IXW7	12;12;12;12;12;11;11;11;11;11;11;10;7;3	10;10;10;10;10;9;9;9;9;9;9;9;6;2	10;10;10;10;10;9;9;9;9;9;9;9;6;2	Fragile X mental retardation protein 1	FMR1	>tr|A8MQB8|A8MQB8_HUMAN Fragile X mental retardation protein 1 OS=Homo sapiens GN=FMR1 PE=2 SV=1;>sp|Q06787-8|FMR1_HUMAN Isoform 8 of Fragile X mental retardation protein 1 OS=Homo sapiens GN=FMR1;>tr|G3V0J0|G3V0J0_HUMAN Fragile X mental retardation 1, iso	14	12	10	10	25.6	21	21	65.821	582	582;586;592;594;611;632;590;603;607;615;620;537;297;262	0.50196	1.1889	1.2645	1.3574	1.2584	1.2264	1.1504	1.1144	0.99663	1.0028	1.0263	0.94877	0.97272	1.4985	NaN	1.2525	1.1354	1.1726	NaN	NaN	0.73904	1.7282	1.6103	NaN	NaN	NaN	NaN	NaN	NaN	0.85543	NaN	0.90533
Q9BY42;A8MSH5;A2A2L5;A2A2L6	Q9BY42;A8MSH5;A2A2L5;A2A2L6	5;5;4;3	5;5;4;3	5;5;4;3	Protein RTF2 homolog	RTFDC1	>sp|Q9BY42|RTF2_HUMAN Protein RTF2 homolog OS=Homo sapiens GN=RTFDC1 PE=1 SV=3;>tr|A8MSH5|A8MSH5_HUMAN Protein RTF2 homolog OS=Homo sapiens GN=RTFDC1 PE=2 SV=2;>tr|A2A2L5|A2A2L5_HUMAN Protein RTF2 homolog (Fragment) OS=Homo sapiens GN=RTFDC1 PE=4 SV=1;>tr|	4	5	5	5	20.6	20.6	20.6	33.886	306	306;336;277;230	NaN	NaN	NaN	NaN	NaN	NaN	NaN	NaN	NaN	NaN	NaN	NaN	NaN	NaN	NaN	NaN	NaN	NaN	NaN	NaN	NaN	NaN	NaN	NaN	NaN	NaN	NaN	NaN	NaN	NaN	NaN	NaN
Q8NCN5;A8MT40;H3BQG3;H3BUH3;B3KSE1;B7ZAR9	Q8NCN5;A8MT40;H3BQG3	6;6;3;1;1;1	6;6;3;1;1;1	6;6;3;1;1;1	Pyruvate dehydrogenase phosphatase regulatory subunit, mitochondrial	PDPR	>sp|Q8NCN5|PDPR_HUMAN Pyruvate dehydrogenase phosphatase regulatory subunit, mitochondrial OS=Homo sapiens GN=PDPR PE=1 SV=2;>tr|A8MT40|A8MT40_HUMAN Pyruvate dehydrogenase phosphatase regulatory subunit, mitochondrial OS=Homo sapiens GN=PDPR PE=2 SV=2;>tr|	6	6	6	6	8.5	8.5	8.5	99.363	879	879;779;491;197;224;237	NaN	NaN	NaN	NaN	NaN	NaN	NaN	NaN	NaN	NaN	NaN	NaN	NaN	NaN	NaN	NaN	NaN	NaN	NaN	NaN	NaN	NaN	NaN	NaN	NaN	NaN	NaN	NaN	NaN	NaN	NaN	NaN
A8MTG8;Q8IUR7;Q8IUR7-3;Q8IUR7-2;B7Z637;Q8IUR7-8;Q8IUR7-7;Q8IUR7-6;C9J2I1;G5E9V7;G5E9V6;H7C5B7;H7C5H2;C9J8P8;C9JAA7;C9JBY2	A8MTG8;Q8IUR7;Q8IUR7-3;Q8IUR7-2;B7Z637;Q8IUR7-8;Q8IUR7-7;Q8IUR7-6;C9J2I1;G5E9V7;G5E9V6	11;10;10;10;9;9;9;6;6;6;6;2;1;1;1;1	11;10;10;10;9;9;9;6;6;6;6;2;1;1;1;1	11;10;10;10;9;9;9;6;6;6;6;2;1;1;1;1	Armadillo repeat-containing protein 8	ARMC8	>tr|A8MTG8|A8MTG8_HUMAN Armadillo repeat-containing protein 8 OS=Homo sapiens GN=ARMC8 PE=2 SV=3;>sp|Q8IUR7|ARMC8_HUMAN Armadillo repeat-containing protein 8 OS=Homo sapiens GN=ARMC8 PE=1 SV=2;>sp|Q8IUR7-3|ARMC8_HUMAN Isoform 3 of Armadillo repeat-containi	16	11	11	11	19	19	19	74.38	663	663;673;631;659;600;606;642;385;352;357;399;113;117;130;198;227	NaN	NaN	0.92683	1.1077	NaN	1.1813	1.3547	NaN	1.4363	NaN	NaN	0.94904	1.0779	1.4053	1.2715	1.5346	1.6022	NaN	NaN	0.98334	0.99111	NaN	NaN	NaN	NaN	0.82225	NaN	0.94555	NaN	NaN	NaN	1.0492
P55854;A8MUA9;B4DUW4;A8MU27	P55854;A8MUA9;B4DUW4;A8MU27	3;3;3;3	2;2;2;2	2;2;2;2	Small ubiquitin-related modifier 3	SUMO3	>sp|P55854|SUMO3_HUMAN Small ubiquitin-related modifier 3 OS=Homo sapiens GN=SUMO3 PE=1 SV=2;>tr|A8MUA9|A8MUA9_HUMAN SMT3 suppressor of mif two 3 homolog 3 (Yeast), isoform CRA_d OS=Homo sapiens GN=SUMO3 PE=4 SV=1;>tr|B4DUW4|B4DUW4_HUMAN Small ubiquitin-re	4	3	2	2	24.3	12.6	12.6	11.637	103	103;135;141;147	0.91186	NaN	NaN	NaN	1.0945	NaN	NaN	NaN	0.87894	NaN	1.1319	NaN	NaN	NaN	0.99215	NaN	NaN	1.0324	NaN	NaN	NaN	NaN	NaN	NaN	NaN	NaN	NaN	NaN	NaN	NaN	NaN	NaN
Q9UJC3;A8MU44	Q9UJC3;A8MU44	5;5	5;5	5;5	Protein Hook homolog 1	HOOK1	>sp|Q9UJC3|HOOK1_HUMAN Protein Hook homolog 1 OS=Homo sapiens GN=HOOK1 PE=1 SV=2;>tr|A8MU44|A8MU44_HUMAN Protein Hook homolog 1 OS=Homo sapiens GN=HOOK1 PE=2 SV=2	2	5	5	5	10.6	10.6	10.6	84.647	728	728;686	NaN	NaN	NaN	NaN	NaN	NaN	NaN	NaN	NaN	NaN	NaN	NaN	NaN	NaN	NaN	NaN	NaN	NaN	NaN	NaN	NaN	NaN	NaN	NaN	NaN	NaN	NaN	NaN	NaN	NaN	NaN	NaN
P68366;A8MUB1;C9JEV8;C9JQ00;C9JJQ8;C9JDL2	P68366;A8MUB1	28;28;9;9;9;5	5;5;4;4;4;2	5;5;4;4;4;2	Tubulin alpha-4A chain	TUBA4A	>sp|P68366|TBA4A_HUMAN Tubulin alpha-4A chain OS=Homo sapiens GN=TUBA4A PE=1 SV=1;>tr|A8MUB1|A8MUB1_HUMAN Tubulin alpha-4A chain OS=Homo sapiens GN=TUBA4A PE=2 SV=1	6	28	5	5	67.6	19.2	19.2	49.924	448	448;433;153;180;198;120	1.0357	1.0773	1.1239	0.99254	1.1379	0.98838	1.063	1.1441	1.0386	1.0651	1.092	0.98667	1.0726	1.0835	1.1496	1.0169	1.018	1.0296	0.96336	1.1807	1.0408	1.0409	1.129	1.0597	0.87171	1.148	1.1092	1.1999	1.1805	1.1208	1.1118	1.0996
Q53HC9;A8MUM1;F8WDS8;C9J0U9;D3YTH5;F8WDX0;F8WB12;C9JVR6	Q53HC9;A8MUM1;F8WDS8;C9J0U9;D3YTH5	5;5;3;3;3;2;2;2	5;5;3;3;3;2;2;2	5;5;3;3;3;2;2;2	Protein TSSC1	TSSC1	>sp|Q53HC9|TSSC1_HUMAN Protein TSSC1 OS=Homo sapiens GN=TSSC1 PE=1 SV=2;>tr|A8MUM1|A8MUM1_HUMAN Protein TSSC1 OS=Homo sapiens GN=TSSC1 PE=2 SV=2;>tr|F8WDS8|F8WDS8_HUMAN Protein TSSC1 OS=Homo sapiens GN=TSSC1 PE=2 SV=1;>tr|C9J0U9|C9J0U9_HUMAN Protein TSSC1	8	5	5	5	20.2	20.2	20.2	43.603	387	387;414;132;155;314;58;87;178	NaN	NaN	NaN	NaN	NaN	NaN	NaN	NaN	NaN	NaN	NaN	NaN	NaN	NaN	NaN	NaN	NaN	NaN	NaN	1.1881	NaN	NaN	NaN	NaN	1.13	NaN	NaN	1.3186	NaN	NaN	NaN	NaN
Q6NW34;E9PFF8;A8MVI8;Q6NW34-2	Q6NW34;E9PFF8;A8MVI8;Q6NW34-2	1;1;1;1	1;1;1;1	1;1;1;1	Uncharacterized protein C3orf17	C3orf17	>sp|Q6NW34|CC017_HUMAN Uncharacterized protein C3orf17 OS=Homo sapiens GN=C3orf17 PE=1 SV=3;>tr|E9PFF8|E9PFF8_HUMAN Uncharacterized protein C3orf17 OS=Homo sapiens GN=C3orf17 PE=2 SV=1;>tr|A8MVI8|A8MVI8_HUMAN Chromosome 3 open reading frame 17, isoform CRA	4	1	1	1	2.5	2.5	2.5	64.551	567	567;238;431;497	NaN	NaN	NaN	NaN	NaN	NaN	NaN	NaN	NaN	NaN	NaN	NaN	NaN	NaN	NaN	NaN	NaN	NaN	NaN	NaN	NaN	NaN	NaN	NaN	NaN	NaN	NaN	NaN	NaN	NaN	NaN	NaN
O43660;A8MW61;O43660-2;D6RA26;H0YA24;B7Z982;H0YAA2	O43660;A8MW61;O43660-2	17;17;16;7;5;3;1	17;17;16;7;5;3;1	17;17;16;7;5;3;1	Pleiotropic regulator 1	PLRG1	>sp|O43660|PLRG1_HUMAN Pleiotropic regulator 1 OS=Homo sapiens GN=PLRG1 PE=1 SV=1;>tr|A8MW61|A8MW61_HUMAN Pleiotropic regulator 1 OS=Homo sapiens GN=PLRG1 PE=2 SV=1;>sp|O43660-2|PLRG1_HUMAN Isoform 2 of Pleiotropic regulator 1 OS=Homo sapiens GN=PLRG1	7	17	17	17	57.4	57.4	57.4	57.193	514	514;514;505;212;156;131;106	0.83623	1.0959	1.1754	1.2822	1.1913	1.1717	1.2279	1.2248	1.1702	1.0609	1.2225	1.155	1.4164	1.2266	1.3553	1.2373	1.1868	1.2462	0.98412	1.2663	1.2939	1.2987	1.2575	1.2023	0.94794	1.3167	1.0539	1.3226	1.2103	1.0179	1.1295	1.3572
P62308;Q49AN9;F5H013;A8MWD9;C9JVQ0	P62308;Q49AN9;F5H013;A8MWD9	3;3;3;3;1	3;3;3;3;1	3;3;3;3;1	Small nuclear ribonucleoprotein G;Small nuclear ribonucleoprotein G-like protein	SNRPG	>sp|P62308|RUXG_HUMAN Small nuclear ribonucleoprotein G OS=Homo sapiens GN=SNRPG PE=1 SV=1;>tr|Q49AN9|Q49AN9_HUMAN SNRPG protein OS=Homo sapiens GN=SNRPG PE=4 SV=1;>tr|F5H013|F5H013_HUMAN Small nuclear ribonucleoprotein G OS=Homo sapiens GN=SNRPG PE=2 SV=1	5	3	3	3	26.3	26.3	26.3	8.496	76	76;64;68;76;96	NaN	1.3166	1.0757	1.0088	NaN	NaN	1.1145	1.1547	NaN	1.2918	1.334	1.2276	1.0082	1.1424	NaN	1.1508	1.1724	NaN	1.1441	1.4985	1.3152	1.2918	1.535	1.4716	1.1555	1.4205	1.5286	1.3546	1.47	1.2528	1.2944	1.4582
P18074;A8MX75;P18074-2;E7EVE9;K7EKF3;K7ENL1;K7EIT8	P18074;A8MX75;P18074-2;E7EVE9;K7EKF3	4;4;3;3;2;1;1	4;4;3;3;2;1;1	4;4;3;3;2;1;1	TFIIH basal transcription factor complex helicase XPD subunit	ERCC2	>sp|P18074|ERCC2_HUMAN TFIIH basal transcription factor complex helicase XPD subunit OS=Homo sapiens GN=ERCC2 PE=1 SV=1;>tr|A8MX75|A8MX75_HUMAN TFIIH basal transcription factor complex helicase XPD subunit (Fragment) OS=Homo sapiens GN=ERCC2 PE=2 SV=2;>sp|	7	4	4	4	7.5	7.5	7.5	86.908	760	760;706;405;682;202;109;292	NaN	NaN	NaN	NaN	NaN	NaN	NaN	NaN	NaN	NaN	NaN	NaN	NaN	NaN	NaN	NaN	NaN	NaN	NaN	NaN	NaN	NaN	NaN	NaN	NaN	NaN	NaN	NaN	NaN	NaN	NaN	NaN
Q9Y343;Q9Y343-2;A8MXB7	Q9Y343;Q9Y343-2;A8MXB7	2;2;2	2;2;2	2;2;2	Sorting nexin-24	SNX24	>sp|Q9Y343|SNX24_HUMAN Sorting nexin-24 OS=Homo sapiens GN=SNX24 PE=1 SV=1;>sp|Q9Y343-2|SNX24_HUMAN Isoform 2 of Sorting nexin-24 OS=Homo sapiens GN=SNX24;>tr|A8MXB7|A8MXB7_HUMAN Sorting nexin-24 OS=Homo sapiens GN=SNX24 PE=2 SV=1	3	2	2	2	11.8	11.8	11.8	19.818	169	169;159;202	NaN	NaN	NaN	NaN	NaN	NaN	NaN	NaN	NaN	NaN	NaN	NaN	NaN	NaN	NaN	NaN	NaN	NaN	NaN	NaN	NaN	NaN	NaN	0.95739	NaN	1.0135	NaN	NaN	NaN	NaN	NaN	1.0478
P53801;A8MZH8;A8MXQ1	P53801;A8MZH8;A8MXQ1	1;1;1	1;1;1	1;1;1	Pituitary tumor-transforming gene 1 protein-interacting protein	PTTG1IP	>sp|P53801|PTTG_HUMAN Pituitary tumor-transforming gene 1 protein-interacting protein OS=Homo sapiens GN=PTTG1IP PE=1 SV=1;>tr|A8MZH8|A8MZH8_HUMAN Pituitary tumor-transforming gene 1 protein-interacting protein OS=Homo sapiens GN=PTTG1IP PE=2 SV=1;>tr|A8MX	3	1	1	1	10	10	10	20.324	180	180;107;159	0.92188	NaN	1.0302	NaN	NaN	NaN	1.0212	0.84499	1.1642	1.0005	0.92745	1.0009	NaN	0.99018	0.88532	1.0357	0.8477	1.0168	NaN	NaN	NaN	NaN	NaN	NaN	NaN	NaN	NaN	NaN	NaN	NaN	NaN	NaN
Q92934;F5GYS3;A8MXU7	Q92934;F5GYS3;A8MXU7	1;1;1	1;1;1	1;1;1	Bcl2 antagonist of cell death	BAD	>sp|Q92934|BAD_HUMAN Bcl2 antagonist of cell death OS=Homo sapiens GN=BAD PE=1 SV=3;>tr|F5GYS3|F5GYS3_HUMAN Bcl2 antagonist of cell death OS=Homo sapiens GN=BAD PE=2 SV=1;>tr|A8MXU7|A8MXU7_HUMAN Bcl2 antagonist of cell death OS=Homo sapiens GN=BAD PE=2 SV=	3	1	1	1	9.5	9.5	9.5	18.392	168	168;157;163	NaN	NaN	NaN	NaN	NaN	NaN	NaN	NaN	NaN	NaN	NaN	NaN	NaN	NaN	NaN	NaN	NaN	NaN	NaN	NaN	NaN	NaN	NaN	NaN	NaN	NaN	NaN	NaN	NaN	NaN	NaN	NaN
A8MXV4	A8MXV4	5	5	5	Nucleoside diphosphate-linked moiety X motif 19, mitochondrial	NUDT19	>sp|A8MXV4|NUD19_HUMAN Nucleoside diphosphate-linked moiety X motif 19, mitochondrial OS=Homo sapiens GN=NUDT19 PE=1 SV=1	1	5	5	5	20.5	20.5	20.5	42.233	375	375	NaN	NaN	NaN	NaN	NaN	NaN	NaN	NaN	NaN	NaN	NaN	NaN	NaN	NaN	NaN	NaN	NaN	NaN	NaN	NaN	NaN	NaN	NaN	NaN	NaN	NaN	NaN	NaN	1.2759	NaN	NaN	NaN
Q9BZG1;A8MYQ9;J3KQW8;C9JBG0;Q9BZG1-4;Q9BZG1-2;C9JY26;E7ES60;K7EIF2;J3QLC6;H7C0Y7;K7EJW7	Q9BZG1;A8MYQ9;J3KQW8;C9JBG0;Q9BZG1-4;Q9BZG1-2;C9JY26;E7ES60	8;8;8;7;7;7;6;6;3;3;3;2	8;8;8;7;7;7;6;6;3;3;3;2	8;8;8;7;7;7;6;6;3;3;3;2	Ras-related protein Rab-34	RAB34	>sp|Q9BZG1|RAB34_HUMAN Ras-related protein Rab-34 OS=Homo sapiens GN=RAB34 PE=1 SV=1;>tr|A8MYQ9|A8MYQ9_HUMAN Ras-related protein Rab-34, isoform NARR OS=Homo sapiens GN=RAB34 PE=2 SV=2;>tr|J3KQW8|J3KQW8_HUMAN Ras-related protein Rab-34, isoform NARR OS=Hom	12	8	8	8	35.1	35.1	35.1	29.044	259	259;260;316;211;237;251;259;268;149;156;171;51	NaN	NaN	NaN	NaN	NaN	NaN	NaN	1.1282	NaN	NaN	1.3297	NaN	NaN	NaN	NaN	NaN	NaN	1.2936	NaN	NaN	NaN	NaN	NaN	NaN	NaN	NaN	NaN	NaN	NaN	NaN	NaN	NaN
Q8NEB9;A8MYT4;M0R0G8;M0R0U1;M0QZG0;M0R2C5;M0R308	Q8NEB9;A8MYT4;M0R0G8	10;10;6;3;2;1;1	10;10;6;3;2;1;1	9;9;6;3;2;1;1	Phosphatidylinositol 3-kinase catalytic subunit type 3	PIK3C3	>sp|Q8NEB9|PK3C3_HUMAN Phosphatidylinositol 3-kinase catalytic subunit type 3 OS=Homo sapiens GN=PIK3C3 PE=1 SV=1;>tr|A8MYT4|A8MYT4_HUMAN Phosphatidylinositol 3-kinase catalytic subunit type 3 OS=Homo sapiens GN=PIK3C3 PE=2 SV=2;>tr|M0R0G8|M0R0G8_HUMAN Pho	7	10	10	9	15.1	15.1	13.5	101.55	887	887;824;372;140;111;51;183	NaN	NaN	NaN	NaN	NaN	NaN	NaN	NaN	NaN	NaN	NaN	NaN	NaN	NaN	NaN	NaN	NaN	NaN	NaN	NaN	NaN	NaN	NaN	NaN	NaN	NaN	NaN	NaN	NaN	NaN	NaN	NaN
A9UHW6;J3KSB8;J3QRZ6;A9UHW6-2;B4DUM7	A9UHW6;J3KSB8;J3QRZ6;A9UHW6-2;B4DUM7	1;1;1;1;1	1;1;1;1;1	1;1;1;1;1	MIF4G domain-containing protein	MIF4GD	>sp|A9UHW6|MI4GD_HUMAN MIF4G domain-containing protein OS=Homo sapiens GN=MIF4GD PE=1 SV=1;>tr|J3KSB8|J3KSB8_HUMAN MIF4G domain-containing protein OS=Homo sapiens GN=MIF4GD PE=4 SV=1;>tr|J3QRZ6|J3QRZ6_HUMAN MIF4G domain-containing protein (Fragment) OS=Hom	5	1	1	1	9.9	9.9	9.9	25.423	222	222;170;205;256;263	NaN	NaN	NaN	NaN	NaN	NaN	NaN	NaN	NaN	NaN	NaN	NaN	NaN	NaN	NaN	NaN	NaN	NaN	NaN	NaN	NaN	NaN	NaN	NaN	NaN	NaN	NaN	NaN	NaN	NaN	NaN	NaN
Q8IYB3;A9Z1X7;Q8IYB3-2;E9PCT1;M0R088;M0R1E7;M0QXG5;B4DED5	Q8IYB3;A9Z1X7;Q8IYB3-2;E9PCT1;M0R088	12;12;12;12;7;4;3;3	12;12;12;12;7;4;3;3	12;12;12;12;7;4;3;3	Serine/arginine repetitive matrix protein 1	SRRM1	>sp|Q8IYB3|SRRM1_HUMAN Serine/arginine repetitive matrix protein 1 OS=Homo sapiens GN=SRRM1 PE=1 SV=2;>tr|A9Z1X7|A9Z1X7_HUMAN Serine/arginine repetitive matrix protein 1 OS=Homo sapiens GN=SRRM1 PE=4 SV=1;>sp|Q8IYB3-2|SRRM1_HUMAN Isoform 2 of Serine/argini	8	12	12	12	15.2	15.2	15.2	102.33	904	904;913;902;916;681;79;102;318	NaN	1.1517	1.5695	0.85163	NaN	0.93981	1.1626	1.0385	1.1379	1.1793	1.4845	1.1829	1.3045	1.3933	1.2113	1.0175	1.345	1.1593	NaN	1.6313	1.2568	NaN	1.4472	1.4825	1.092	NaN	NaN	1.0713	NaN	NaN	1.9631	NaN
O60825;O60825-2;B0FLL2;B4DY91;B4DI16;Q16875;F2Z2I2;Q5VX15;Q5W015;Q16875-2;Q5VX20;Q16877;P16118;Q4VBA9;B4DUN5;Q5XLC2;Q64EX5;B7Z5C3;Q66S35;H0Y483;F5H5L1	O60825;O60825-2;B0FLL2;B4DY91;B4DI16	14;14;14;12;8;4;4;4;4;4;4;3;3;3;3;3;3;3;3;2;1	14;14;14;12;8;4;4;4;4;4;4;3;3;3;3;3;3;3;3;2;1	10;10;10;9;5;0;0;0;0;0;0;1;1;1;1;1;1;1;1;0;0	6-phosphofructo-2-kinase/fructose-2,6-bisphosphatase 2;6-phosphofructo-2-kinase;Fructose-2,6-bisphosphatase	PFKFB2	>sp|O60825|F262_HUMAN 6-phosphofructo-2-kinase/fructose-2,6-bisphosphatase 2 OS=Homo sapiens GN=PFKFB2 PE=1 SV=2;>sp|O60825-2|F262_HUMAN Isoform 2 of 6-phosphofructo-2-kinase/fructose-2,6-bisphosphatase 2 OS=Homo sapiens GN=PFKFB2;>tr|B0FLL2|B0FLL2_HUMAN 6	21	14	14	10	29.5	29.5	21.2	58.476	505	505;471;472;373;264;520;455;500;513;514;526;469;471;271;406;434;435;458;462;143;184	NaN	NaN	NaN	NaN	NaN	NaN	NaN	NaN	NaN	NaN	NaN	NaN	NaN	NaN	NaN	NaN	NaN	NaN	NaN	NaN	1.0772	NaN	0.82756	NaN	NaN	1.3205	NaN	NaN	1.4439	NaN	NaN	NaN
B0I1T2;B0I1T2-3;B0I1T2-4	B0I1T2;B0I1T2-3;B0I1T2-4	3;2;2	3;2;2	3;2;2	Unconventional myosin-Ig;Minor histocompatibility antigen HA-2	MYO1G	>sp|B0I1T2|MYO1G_HUMAN Unconventional myosin-Ig OS=Homo sapiens GN=MYO1G PE=1 SV=2;>sp|B0I1T2-3|MYO1G_HUMAN Isoform 3 of Unconventional myosin-Ig OS=Homo sapiens GN=MYO1G;>sp|B0I1T2-4|MYO1G_HUMAN Isoform 4 of Unconventional myosin-Ig OS=Homo sapiens GN=MYO	3	3	3	3	2.6	2.6	2.6	116.44	1018	1018;525;722	NaN	NaN	NaN	NaN	NaN	NaN	NaN	NaN	NaN	NaN	NaN	NaN	NaN	NaN	NaN	NaN	NaN	NaN	0.76639	NaN	NaN	0.73628	0.7951	NaN	NaN	0.75862	NaN	NaN	NaN	NaN	NaN	0.90898
Q9Y262;B0QY89;Q9Y262-2;J3KN35;B0QY90;C9JHP4;C9K0Q7;H7C3A0;H0Y7E6	Q9Y262;B0QY89;Q9Y262-2;J3KN35;B0QY90	30;30;29;29;23;8;8;6;4	30;30;29;29;23;8;8;6;4	30;30;29;29;23;8;8;6;4	Eukaryotic translation initiation factor 3 subunit L	EIF3L	>sp|Q9Y262|EIF3L_HUMAN Eukaryotic translation initiation factor 3 subunit L OS=Homo sapiens GN=EIF3L PE=1 SV=1;>tr|B0QY89|B0QY89_HUMAN Eukaryotic translation initiation factor 3 subunit L OS=Homo sapiens GN=EIF3L PE=4 SV=1;>sp|Q9Y262-2|EIF3L_HUMAN Isoform	9	30	30	30	52.5	52.5	52.5	66.726	564	564;607;516;531;466;150;183;127;109	0.95827	1.0343	1.0513	1.0448	1.0957	1.0849	0.98994	1.0246	1.0589	0.96937	1.0327	1.0545	1.0187	1.1279	1.1943	1.0007	1.0034	1.1182	0.87221	1.2627	1.1247	1.1512	1.1724	1.2176	0.99328	1.1164	1.1318	1.1708	1.2106	1.193	1.2315	1.224
Q9UH17;B0QYD3;P31941;P31941-2;Q9UH17-3;Q9UH17-2	Q9UH17;B0QYD3;P31941;P31941-2;Q9UH17-3	6;6;4;4;4;1	6;6;4;4;4;1	6;6;4;4;4;1	DNA dC->dU-editing enzyme APOBEC-3B;DNA dC->dU-editing enzyme APOBEC-3A	APOBEC3B;APOBEC3A	>sp|Q9UH17|ABC3B_HUMAN DNA dC->dU-editing enzyme APOBEC-3B OS=Homo sapiens GN=APOBEC3B PE=1 SV=1;>tr|B0QYD3|B0QYD3_HUMAN Probable DNA dC->dU-editing enzyme APOBEC-3B OS=Homo sapiens GN=APOBEC3B PE=2 SV=1;>sp|P31941|ABC3A_HUMAN DNA dC->dU-editing enzyme APO	6	6	6	6	19.4	19.4	19.4	45.924	382	382;490;199;187;357;251	NaN	NaN	NaN	NaN	NaN	2.0809	NaN	NaN	NaN	NaN	NaN	1.1645	1.1878	1.272	NaN	1.2345	NaN	NaN	NaN	NaN	NaN	NaN	NaN	NaN	NaN	1.2272	NaN	1.2166	NaN	NaN	NaN	NaN
Q01844;Q01844-6;B0QYK0;Q01844-3;Q01844-5;Q01844-2;C9JGE3;H7BY36;Q01844-4;F8WC90	Q01844;Q01844-6;B0QYK0;Q01844-3;Q01844-5;Q01844-2;C9JGE3;H7BY36	8;8;8;8;8;7;7;6;1;1	8;8;8;8;8;7;7;6;1;1	8;8;8;8;8;7;7;6;1;1	RNA-binding protein EWS	EWSR1	>sp|Q01844|EWS_HUMAN RNA-binding protein EWS OS=Homo sapiens GN=EWSR1 PE=1 SV=1;>sp|Q01844-6|EWS_HUMAN Isoform 6 of RNA-binding protein EWS OS=Homo sapiens GN=EWSR1;>tr|B0QYK0|B0QYK0_HUMAN RNA-binding protein EWS OS=Homo sapiens GN=EWSR1 PE=4 SV=1;>sp|Q018	10	8	8	8	15.2	15.2	15.2	68.477	656	656;600;618;655;661;583;583;308;354;293	0.9573	1.0918	1.0575	1.0379	1.048	1.1881	1.1726	1.0274	1.1747	1.1652	1.128	1.2771	1.251	1.2416	1.2963	1.1044	1.1821	1.2689	1.0539	1.338	1.3235	1.1993	1.2795	1.235	1.0585	1.2977	1.1235	1.3499	1.3136	0.94885	1.2394	1.3526
Q9UJY5;B0QYR6;Q9UJY5-4;Q9UJY5-3;Q6IC75;Q9UJY5-2;B0QYS4;B0QYS5;Q9UJY4;B0QYR9;B0QYS0;B0QYS1;B0QYS2;B0QYS3;B0QYR5;H3BPI3;H3BMM6	Q9UJY5;B0QYR6;Q9UJY5-4;Q9UJY5-3;Q6IC75;Q9UJY5-2;B0QYS4;B0QYS5	4;4;4;4;4;3;2;2;1;1;1;1;1;1;1;1;1	3;3;3;3;3;3;1;1;0;0;0;0;0;0;0;0;0	3;3;3;3;3;3;1;1;0;0;0;0;0;0;0;0;0	ADP-ribosylation factor-binding protein GGA1	GGA1	>sp|Q9UJY5|GGA1_HUMAN ADP-ribosylation factor-binding protein GGA1 OS=Homo sapiens GN=GGA1 PE=1 SV=1;>tr|B0QYR6|B0QYR6_HUMAN ADP-ribosylation factor-binding protein GGA1 (Fragment) OS=Homo sapiens GN=GGA1 PE=4 SV=1;>sp|Q9UJY5-4|GGA1_HUMAN Isoform 4 of ADP-	17	4	3	3	8.3	7.2	7.2	70.383	639	639;246;552;566;656;606;108;109;613;28;38;40;60;70;105;125;223	NaN	NaN	NaN	NaN	NaN	NaN	NaN	NaN	NaN	NaN	NaN	NaN	NaN	NaN	NaN	NaN	NaN	NaN	NaN	NaN	NaN	NaN	NaN	NaN	NaN	NaN	NaN	NaN	NaN	NaN	NaN	NaN
O43808;B0QYW5;F5GYD1;B4DU97;F8WE74	O43808;B0QYW5;F5GYD1;B4DU97;F8WE74	4;4;4;4;2	4;4;4;4;2	4;4;4;4;2	Peroxisomal membrane protein PMP34	SLC25A17	>sp|O43808|PM34_HUMAN Peroxisomal membrane protein PMP34 OS=Homo sapiens GN=SLC25A17 PE=1 SV=1;>tr|B0QYW5|B0QYW5_HUMAN Peroxisomal membrane protein PMP34 OS=Homo sapiens GN=SLC25A17 PE=4 SV=1;>tr|F5GYD1|F5GYD1_HUMAN Peroxisomal membrane protein PMP34 OS=Ho	5	4	4	4	15.3	15.3	15.3	34.566	307	307;225;234;270;239	NaN	NaN	NaN	NaN	NaN	NaN	NaN	NaN	NaN	NaN	NaN	NaN	NaN	NaN	NaN	NaN	NaN	NaN	NaN	NaN	NaN	NaN	NaN	1.3792	NaN	NaN	NaN	NaN	NaN	NaN	NaN	NaN
Q99829;F2Z2V0;B0QZ18;E7ENH5;A6PVH9;Q5JX45;Q5JX58;Q5JX59;Q5JX60;Q5JX44;Q5JX56;H0Y524;Q5JX61;Q5JX52;Q5JX54;Q5JX55;Q5JX53;Q5JX57;E7EV27	Q99829;F2Z2V0;B0QZ18;E7ENH5;A6PVH9;Q5JX45;Q5JX58;Q5JX59;Q5JX60;Q5JX44	9;9;9;7;7;6;5;5;5;5;4;4;4;4;3;3;2;2;2	9;9;9;7;7;6;5;5;5;5;4;4;4;4;3;3;2;2;2	9;9;9;7;7;6;5;5;5;5;4;4;4;4;3;3;2;2;2	Copine-1	CPNE1	>sp|Q99829|CPNE1_HUMAN Copine-1 OS=Homo sapiens GN=CPNE1 PE=1 SV=1;>tr|F2Z2V0|F2Z2V0_HUMAN Copine-1 (Fragment) OS=Homo sapiens GN=CPNE1 PE=2 SV=1;>tr|B0QZ18|B0QZ18_HUMAN Copine-1 OS=Homo sapiens GN=CPNE1 PE=4 SV=1;>tr|E7ENH5|E7ENH5_HUMAN Copine-1 OS=Homo s	19	9	9	9	14.3	14.3	14.3	59.058	537	537;533;542;427;481;386;202;209;231;304;174;208;213;305;136;152;67;138;138	0.85415	1.0357	0.98049	0.8158	0.97358	1.0822	1.0245	0.90803	1.1377	0.9771	0.968	0.90217	0.89987	1.1536	NaN	0.94571	0.77642	0.86506	1.0409	1.2151	0.99831	1.0191	1.0887	1.0128	0.95321	1.0147	1.1206	1.0396	1.1274	1.0517	1.0076	1.0456
Q96EB6;B0QZ35;E9PC49;Q96EB6-2	Q96EB6;B0QZ35;E9PC49	3;3;3;1	3;3;3;1	3;3;3;1	NAD-dependent protein deacetylase sirtuin-1;SirtT1 75 kDa fragment	SIRT1	>sp|Q96EB6|SIR1_HUMAN NAD-dependent protein deacetylase sirtuin-1 OS=Homo sapiens GN=SIRT1 PE=1 SV=2;>tr|B0QZ35|B0QZ35_HUMAN SirtT1 75 kDa fragment OS=Homo sapiens GN=SIRT1 PE=2 SV=1;>tr|E9PC49|E9PC49_HUMAN SirtT1 75 kDa fragment OS=Homo sapiens GN=SIRT1 P	4	3	3	3	5.8	5.8	5.8	81.68	747	747;444;452;561	NaN	NaN	NaN	NaN	NaN	NaN	NaN	NaN	NaN	NaN	NaN	NaN	NaN	NaN	NaN	NaN	NaN	NaN	NaN	NaN	NaN	NaN	NaN	NaN	NaN	NaN	NaN	NaN	NaN	NaN	NaN	NaN
P25440;H0Y6K2;H0Y5T9;P25440-2;B0S7P1;Q658Y7;F8VXF8;B0V072;H0Y602;B0V073;H0YAU3;H0Y665;H0Y801;H0Y799;E9PIQ3;E9PKQ9	P25440;H0Y6K2;H0Y5T9;P25440-2;B0S7P1;Q658Y7;F8VXF8;B0V072;H0Y602;B0V073;H0YAU3;H0Y665	12;12;12;12;12;11;11;7;7;7;6;6;3;3;3;1	9;9;9;9;9;8;8;6;6;6;4;4;3;3;3;1	9;9;9;9;9;8;8;6;6;6;4;4;3;3;3;1	Bromodomain-containing protein 2	BRD2;DKFZp313H139	>sp|P25440|BRD2_HUMAN Bromodomain-containing protein 2 OS=Homo sapiens GN=BRD2 PE=1 SV=2;>tr|H0Y6K2|H0Y6K2_HUMAN Bromodomain-containing protein 2 (Fragment) OS=Homo sapiens GN=BRD2 PE=4 SV=1;>tr|H0Y5T9|H0Y5T9_HUMAN Bromodomain-containing protein 2 (Fragmen	16	12	9	9	18.2	15.5	15.5	88.06	801	801;807;807;836;836;681;681;613;619;648;328;363;296;296;401;147	NaN	NaN	NaN	1.0069	1.1427	NaN	NaN	NaN	NaN	1.2019	NaN	NaN	NaN	NaN	NaN	NaN	NaN	NaN	0.92361	NaN	0.75592	NaN	NaN	1.0337	0.77689	NaN	0.96176	1.2507	NaN	1.0118	1.0572	0.92502
E7ERM2;P30508;B0S7Z5;Q29960-2;Q29960;B0S7Z4;Q29963;P30510;B0UY14;B0S7Z6;P30505;Q07000;Q9TNN7;Q29865;B0UY12;A2BF25;B0UY15;P30504;P10321;A2BF26;A2BF24;A2AEA2;Q95604;A2AEA4;F5GXA6;P30499;O19617;A2ABE5;A2ABE6;A2ABE7;F8VZB9;P30501;E9PIT7;E9PLQ4;E9PQE4;H0Y7C7;H0Y777;P01893	E7ERM2;P30508;B0S7Z5;Q29960-2;Q29960;B0S7Z4;Q29963;P30510;B0UY14;B0S7Z6;P30505;Q07000;Q9TNN7;Q29865;B0UY12;A2BF25;B0UY15;P30504;P10321;A2BF26;A2BF24;A2AEA2;Q95604;A2AEA4;F5GXA6;P30499;O19617;A2ABE5;A2ABE6;A2ABE7;F8VZB9	14;14;14;13;13;12;12;12;12;12;11;11;10;10;10;10;10;9;8;8;8;8;8;8;8;7;7;7;7;7;7;6;6;5;5;5;5;3	10;10;10;9;9;8;9;9;9;8;8;8;7;8;7;7;7;6;5;5;5;5;6;5;5;5;4;4;4;4;4;5;4;4;3;3;3;2	0;0;0;0;0;0;0;0;0;0;0;0;0;0;0;0;0;0;0;0;0;0;0;0;0;0;0;0;0;0;0;0;0;0;0;0;0;0	HLA class I histocompatibility antigen, Cw-12 alpha chain;HLA class I histocompatibility antigen, Cw-16 alpha chain;HLA class I histocompatibility antigen, Cw-6 alpha chain;HLA class I histocompatibility antigen, Cw-14 alpha chain;HLA class I histocompatibility antigen, Cw-8 alpha chain;HLA class I histocompatibility antigen, Cw-15 alpha chain;HLA class I histocompatibility antigen, Cw-5 alpha ch…	HLA-C	>tr|E7ERM2|E7ERM2_HUMAN HLA class I histocompatibility antigen, Cw-14 alpha chain OS=Homo sapiens GN=HLA-C PE=2 SV=1;>sp|P30508|1C12_HUMAN HLA class I histocompatibility antigen, Cw-12 alpha chain OS=Homo sapiens GN=HLA-C PE=2 SV=2;>tr|B0S7Z5|B0S7Z5_HUMAN	38	14	10	0	51.5	35.9	0	36.858	326	326;366;372;326;366;339;366;366;372;397;366;366;366;366;368;372;397;366;366;397;368;372;372;397;403;366;366;368;372;397;403;366;224;131;224;261;261;362	1.106	0.99245	1.0015	1.0342	1.1098	0.82562	1.1316	0.9807	1.0246	1.098	1.0519	1.0094	0.99079	1.1616	0.66441	1.0343	0.81507	0.92951	1.0331	1.2136	1.0612	1.0429	1.1833	0.97876	0.8889	1.0406	1.0636	1.0924	1.0896	1.1572	1.07	1.0951
Q9UMR5;G8JLQ0;G8JLE1;G3XAH1;B0S872;G8JLL2;B0UYY4;B0S865;B0UYY6;B0UYY2;E9PRP4	Q9UMR5;G8JLQ0;G8JLE1;G3XAH1;B0S872;G8JLL2;B0UYY4;B0S865;B0UYY6;B0UYY2;E9PRP4	4;4;4;4;4;3;3;3;3;3;2	4;4;4;4;4;3;3;3;3;3;2	1;1;1;1;1;0;0;0;0;0;0	Lysosomal thioesterase PPT2	PPT2	>sp|Q9UMR5|PPT2_HUMAN Lysosomal thioesterase PPT2 OS=Homo sapiens GN=PPT2 PE=1 SV=4;>tr|G8JLQ0|G8JLQ0_HUMAN Lysosomal thioesterase PPT2 OS=Homo sapiens GN=PPT2 PE=4 SV=1;>tr|G8JLE1|G8JLE1_HUMAN Lysosomal thioesterase PPT2 OS=Homo sapiens GN=PPT2 PE=2 SV=1;	11	4	4	1	17.5	17.5	4	34.225	302	302;302;308;308;308;180;180;180;236;242;132	0.32185	NaN	NaN	NaN	NaN	0.80282	NaN	NaN	NaN	NaN	NaN	NaN	NaN	NaN	NaN	NaN	NaN	NaN	0.88562	0.9469	0.89572	1.0353	0.62543	0.69831	NaN	NaN	0.70259	NaN	NaN	NaN	0.91126	0.71885
Q14657;B0S8I7	Q14657;B0S8I7	1;1	1;1	1;1	L antigen family member 3	LAGE3	>sp|Q14657|LAGE3_HUMAN L antigen family member 3 OS=Homo sapiens GN=LAGE3 PE=1 SV=2;>tr|B0S8I7|B0S8I7_HUMAN L antigen family member 3 OS=Homo sapiens GN=LAGE3 PE=2 SV=1	2	1	1	1	16.1	16.1	16.1	14.804	143	143;106	NaN	NaN	NaN	NaN	NaN	NaN	NaN	NaN	NaN	NaN	NaN	NaN	NaN	NaN	NaN	NaN	NaN	NaN	NaN	NaN	NaN	NaN	NaN	NaN	NaN	NaN	NaN	NaN	NaN	NaN	NaN	NaN
P46379;P46379-2;B0UX83;P46379-3;G3V1Z5;P46379-5;F8VX53;P46379-4;F6TH84;F6S6P2;F6UR09;F6U1F2;F6XTU0;F6RG75;F6WML8;F6VEM6;F6X9W3;F6U341;F6TC96;H0Y710;H0Y4L1;H0Y7K4;H0Y759;H0Y410;H0Y583;H0Y571	P46379;P46379-2;B0UX83;P46379-3;G3V1Z5;P46379-5;F8VX53;P46379-4;F6TH84	26;26;26;26;26;22;22;20;13;12;8;8;8;8;8;8;8;8;6;4;2;1;1;1;1;1	26;26;26;26;26;22;22;20;13;12;8;8;8;8;8;8;8;8;6;4;2;1;1;1;1;1	26;26;26;26;26;22;22;20;13;12;8;8;8;8;8;8;8;8;6;4;2;1;1;1;1;1	Large proline-rich protein BAG6	BAG6	>sp|P46379|BAG6_HUMAN Large proline-rich protein BAG6 OS=Homo sapiens GN=BAG6 PE=1 SV=2;>sp|P46379-2|BAG6_HUMAN Isoform 2 of Large proline-rich protein BAG6 OS=Homo sapiens GN=BAG6;>tr|B0UX83|B0UX83_HUMAN HLA-B associated transcript 3, isoform CRA_a OS=Hom	26	26	26	26	35.4	35.4	35.4	119.41	1132	1132;1126;1126;1162;1162;1077;1077;903;743;515;197;206;215;233;244;258;259;262;158;226;136;185;238;238;245;245	0.90149	1.0872	0.95667	1.0323	1.1912	1.0585	1.0582	0.95067	1.12	1.1637	1.1621	1.0798	1.1612	1.0024	1.1843	1.2545	1.151	1.0599	1.0131	1.1571	1.0795	1.0845	1.0958	1.1792	0.93662	1.351	0.95274	1.0154	1.1642	0.98145	1.2716	1.1737
O95870;B0UXB6;O95870-2;F6WSP1;B3KNX9;F2Z3H2	O95870;B0UXB6;O95870-2	5;5;4;2;2;1	5;5;4;2;2;1	5;5;4;2;2;1	Abhydrolase domain-containing protein 16A	ABHD16A	>sp|O95870|ABHGA_HUMAN Abhydrolase domain-containing protein 16A OS=Homo sapiens GN=ABHD16A PE=1 SV=3;>tr|B0UXB6|B0UXB6_HUMAN Abhydrolase domain-containing protein 16A OS=Homo sapiens GN=ABHD16A PE=4 SV=1;>sp|O95870-2|ABHGA_HUMAN Isoform 2 of Abhydrolase d	6	5	5	5	12.7	12.7	12.7	63.243	558	558;601;525;264;339;65	NaN	NaN	NaN	NaN	NaN	NaN	NaN	NaN	NaN	NaN	NaN	NaN	NaN	NaN	NaN	NaN	NaN	NaN	NaN	NaN	NaN	1.2929	NaN	NaN	NaN	NaN	NaN	NaN	NaN	NaN	NaN	NaN
P02656;B0YIW2	P02656;B0YIW2	1;1	1;1	1;1	Apolipoprotein C-III	APOC3	>sp|P02656|APOC3_HUMAN Apolipoprotein C-III OS=Homo sapiens GN=APOC3 PE=1 SV=1;>tr|B0YIW2|B0YIW2_HUMAN Apolipoprotein C-III OS=Homo sapiens GN=APOC3 PE=4 SV=1	2	1	1	1	16.2	16.2	16.2	10.852	99	99;117	NaN	NaN	1.3436	1.299	NaN	1.5347	1.3402	NaN	1.5021	NaN	1.2533	NaN	NaN	1.4072	NaN	1.4287	NaN	NaN	NaN	NaN	NaN	NaN	NaN	1.4231	NaN	NaN	NaN	NaN	NaN	NaN	NaN	NaN
B0YJC5	B0YJC5	27	1	0		VIM	>tr|B0YJC5|B0YJC5_HUMAN Vimentin OS=Homo sapiens GN=VIM PE=3 SV=1	1	27	1	0	89	5.3	0	26.859	228	228	NaN	NaN	NaN	NaN	NaN	NaN	NaN	NaN	NaN	NaN	NaN	NaN	NaN	NaN	NaN	NaN	NaN	NaN	NaN	NaN	NaN	NaN	NaN	NaN	NaN	NaN	NaN	NaN	NaN	NaN	NaN	NaN
P09601;B1AHA8	P09601;B1AHA8	8;8	8;8	8;8	Heme oxygenase 1	HMOX1	>sp|P09601|HMOX1_HUMAN Heme oxygenase 1 OS=Homo sapiens GN=HMOX1 PE=1 SV=1;>tr|B1AHA8|B1AHA8_HUMAN Heme oxygenase 1 (Fragment) OS=Homo sapiens GN=HMOX1 PE=4 SV=1	2	8	8	8	34.7	34.7	34.7	32.818	288	288;187	NaN	NaN	NaN	NaN	NaN	NaN	NaN	NaN	NaN	NaN	NaN	NaN	NaN	NaN	NaN	NaN	NaN	NaN	NaN	NaN	NaN	NaN	NaN	NaN	NaN	NaN	NaN	NaN	NaN	NaN	NaN	NaN
B1AHQ6;Q9NSP4;B1AHQ7;Q9NSP4-4;Q9NSP4-2;B1AHQ8;Q9NSP4-3	B1AHQ6;Q9NSP4;B1AHQ7;Q9NSP4-4;Q9NSP4-2;B1AHQ8	4;4;3;3;3;2;1	4;4;3;3;3;2;1	4;4;3;3;3;2;1	Centromere protein M	CENPM	>tr|B1AHQ6|B1AHQ6_HUMAN Centromere protein M OS=Homo sapiens GN=CENPM PE=4 SV=1;>sp|Q9NSP4|CENPM_HUMAN Centromere protein M OS=Homo sapiens GN=CENPM PE=1 SV=1;>tr|B1AHQ7|B1AHQ7_HUMAN Centromere protein M OS=Homo sapiens GN=CENPM PE=4 SV=1;>sp|Q9NSP4-4|CENP	7	4	4	4	39.7	39.7	39.7	16.148	146	146;180;73;107;132;125;58	NaN	NaN	NaN	NaN	NaN	NaN	NaN	NaN	NaN	1.2318	NaN	NaN	NaN	NaN	NaN	NaN	NaN	NaN	1.0385	NaN	NaN	NaN	NaN	NaN	0.94331	1.2059	NaN	NaN	1.2158	NaN	NaN	1.2922
Q86Y82;B1AJQ6	Q86Y82;B1AJQ6	5;5	5;5	5;5	Syntaxin-12	STX12	>sp|Q86Y82|STX12_HUMAN Syntaxin-12 OS=Homo sapiens GN=STX12 PE=1 SV=1;>tr|B1AJQ6|B1AJQ6_HUMAN Syntaxin-12 (Fragment) OS=Homo sapiens GN=STX12 PE=4 SV=1	2	5	5	5	26.4	26.4	26.4	31.642	276	276;234	NaN	NaN	NaN	NaN	NaN	NaN	NaN	NaN	NaN	NaN	NaN	NaN	NaN	NaN	NaN	NaN	NaN	NaN	0.93086	NaN	NaN	NaN	NaN	NaN	NaN	NaN	NaN	NaN	NaN	NaN	1.1102	1.0066
P35914;B1AK13;P35914-2;H0Y2L7	P35914;B1AK13;P35914-2	4;4;2;1	4;4;2;1	4;4;2;1	Hydroxymethylglutaryl-CoA lyase, mitochondrial	HMGCL	>sp|P35914|HMGCL_HUMAN Hydroxymethylglutaryl-CoA lyase, mitochondrial OS=Homo sapiens GN=HMGCL PE=1 SV=2;>tr|B1AK13|B1AK13_HUMAN 3-hydroxymethyl-3-methylglutaryl-Coenzyme A lyase (Hydroxymethylglutaricaciduria), isoform CRA_b OS=Homo sapiens GN=HMGCL PE=2	4	4	4	4	16.6	16.6	16.6	34.36	325	325;300;254;182	NaN	NaN	NaN	NaN	NaN	NaN	NaN	NaN	NaN	NaN	NaN	NaN	NaN	NaN	NaN	NaN	NaN	NaN	NaN	NaN	NaN	NaN	NaN	NaN	NaN	NaN	NaN	NaN	NaN	NaN	NaN	NaN
Q9HAF1;Q9HAF1-2;B1AK64;Q9HAF1-3	Q9HAF1;Q9HAF1-2;B1AK64;Q9HAF1-3	3;3;3;3	3;3;3;3	2;2;2;2	Chromatin modification-related protein MEAF6	MEAF6	>sp|Q9HAF1|EAF6_HUMAN Chromatin modification-related protein MEAF6 OS=Homo sapiens GN=MEAF6 PE=1 SV=1;>sp|Q9HAF1-2|EAF6_HUMAN Isoform 2 of Chromatin modification-related protein MEAF6 OS=Homo sapiens GN=MEAF6;>tr|B1AK64|B1AK64_HUMAN Chromatin modification-	4	3	3	2	22.5	22.5	11	21.635	191	191;191;192;201	NaN	NaN	NaN	NaN	NaN	NaN	NaN	NaN	NaN	NaN	NaN	NaN	NaN	NaN	NaN	NaN	NaN	NaN	NaN	NaN	NaN	NaN	NaN	NaN	NaN	NaN	NaN	NaN	NaN	NaN	NaN	NaN
Q9UJF2;H0Y638;B1AKC7;Q9UJF2-2	Q9UJF2;H0Y638;B1AKC7;Q9UJF2-2	5;5;5;5	5;5;5;5	5;5;5;5	Ras GTPase-activating protein nGAP	RASAL2	>sp|Q9UJF2|NGAP_HUMAN Ras GTPase-activating protein nGAP OS=Homo sapiens GN=RASAL2 PE=1 SV=2;>tr|H0Y638|H0Y638_HUMAN Ras GTPase-activating protein nGAP (Fragment) OS=Homo sapiens GN=RASAL2 PE=4 SV=1;>tr|B1AKC7|B1AKC7_HUMAN Ras GTPase-activating protein nGA	4	5	5	5	8.7	8.7	8.7	128.56	1139	1139;693;1269;1280	NaN	NaN	NaN	NaN	NaN	NaN	NaN	NaN	NaN	NaN	NaN	NaN	NaN	NaN	NaN	NaN	NaN	NaN	NaN	NaN	NaN	NaN	NaN	NaN	NaN	NaN	NaN	NaN	NaN	NaN	NaN	NaN
O43847;O43847-2;B1AKJ5;G3V1R5;F5H7V1;H0Y5G9	O43847;O43847-2;B1AKJ5;G3V1R5;F5H7V1	30;30;30;28;19;12	30;30;30;28;19;12	30;30;30;28;19;12	Nardilysin	NRD1	>sp|O43847|NRDC_HUMAN Nardilysin OS=Homo sapiens GN=NRD1 PE=1 SV=2;>sp|O43847-2|NRDC_HUMAN Isoform 2 of Nardilysin OS=Homo sapiens GN=NRD1;>tr|B1AKJ5|B1AKJ5_HUMAN Nardilysin OS=Homo sapiens GN=NRD1 PE=3 SV=1;>tr|G3V1R5|G3V1R5_HUMAN Nardilysin OS=Homo sapie	6	30	30	30	31	31	31	131.57	1150	1150;1218;1219;1087;747;538	0.93934	0.99043	0.89155	0.91422	1.1795	0.91862	0.89851	1.0447	1.1187	0.93576	1.0861	1.0973	1.0669	1.0726	1.0721	1.0229	1.2117	1.1222	1.2516	1.3262	1.108	1.2112	1.225	1.0777	1.0261	1.1523	1.2173	1.154	1.1333	1.1734	1.1524	1.2063
Q9Y483;Q9Y483-2;Q9Y483-3;B1AKT6	Q9Y483;Q9Y483-2;Q9Y483-3;B1AKT6	2;2;2;2	2;2;2;2	2;2;2;2	Metal-response element-binding transcription factor 2	MTF2	>sp|Q9Y483|MTF2_HUMAN Metal-response element-binding transcription factor 2 OS=Homo sapiens GN=MTF2 PE=1 SV=2;>sp|Q9Y483-2|MTF2_HUMAN Isoform 2 of Metal-response element-binding transcription factor 2 OS=Homo sapiens GN=MTF2;>sp|Q9Y483-3|MTF2_HUMAN Isoform	4	2	2	2	4.2	4.2	4.2	67.105	593	593;262;491;536	NaN	NaN	NaN	NaN	NaN	NaN	NaN	NaN	NaN	NaN	NaN	NaN	NaN	NaN	NaN	NaN	NaN	NaN	NaN	NaN	NaN	NaN	NaN	NaN	NaN	NaN	NaN	NaN	NaN	NaN	NaN	NaN
Q9NVA1;B1AKV6;B1AKV3;Q9NVA1-4;F8WCR2;B7Z1C6;F5H4C5;Q9NVA1-3;H7BYA2;B7Z314;B1AKV4;B1AKV2;Q9NVA1-5;Q9NVA1-2	Q9NVA1;B1AKV6;B1AKV3;Q9NVA1-4;F8WCR2;B7Z1C6;F5H4C5;Q9NVA1-3;H7BYA2;B7Z314;B1AKV4;B1AKV2;Q9NVA1-5;Q9NVA1-2	2;2;2;2;1;1;1;1;1;1;1;1;1;1	2;2;2;2;1;1;1;1;1;1;1;1;1;1	2;2;2;2;1;1;1;1;1;1;1;1;1;1	Ubiquinol-cytochrome c reductase complex chaperone CBP3 homolog	UQCC	>sp|Q9NVA1|UQCC_HUMAN Ubiquinol-cytochrome c reductase complex chaperone CBP3 homolog OS=Homo sapiens GN=UQCC PE=1 SV=3;>tr|B1AKV6|B1AKV6_HUMAN Ubiquinol-cytochrome c reductase complex chaperone CBP3 homolog (Fragment) OS=Homo sapiens GN=UQCC PE=4 SV=1;>tr	14	2	2	2	7.4	7.4	7.4	34.6	299	299;243;249;272;124;144;148;184;187;200;219;221;231;273	NaN	NaN	NaN	NaN	NaN	NaN	NaN	NaN	NaN	NaN	NaN	NaN	NaN	NaN	NaN	NaN	NaN	NaN	NaN	NaN	NaN	NaN	NaN	NaN	NaN	NaN	NaN	NaN	NaN	NaN	NaN	NaN
Q15121;B1AKZ3;B1AKZ5	Q15121;B1AKZ3	4;4;1	4;4;1	4;4;1	Astrocytic phosphoprotein PEA-15	PEA15	>sp|Q15121|PEA15_HUMAN Astrocytic phosphoprotein PEA-15 OS=Homo sapiens GN=PEA15 PE=1 SV=2;>tr|B1AKZ3|B1AKZ3_HUMAN Astrocytic phosphoprotein PEA-15 OS=Homo sapiens GN=PEA15 PE=2 SV=1	3	4	4	4	35.4	35.4	35.4	15.04	130	130;151;108	NaN	NaN	NaN	NaN	NaN	NaN	1.1292	NaN	NaN	1.0114	1.0843	1.2163	NaN	1.0102	1.1595	0.93022	1.062	0.82313	NaN	NaN	NaN	NaN	NaN	NaN	NaN	NaN	NaN	NaN	NaN	NaN	NaN	NaN
Q7L3B6;B1AL69	Q7L3B6;B1AL69	4;4	4;4	4;4	Hsp90 co-chaperone Cdc37-like 1	CDC37L1	>sp|Q7L3B6|CD37L_HUMAN Hsp90 co-chaperone Cdc37-like 1 OS=Homo sapiens GN=CDC37L1 PE=1 SV=1;>tr|B1AL69|B1AL69_HUMAN Hsp90 co-chaperone Cdc37-like 1 OS=Homo sapiens GN=CDC37L1 PE=2 SV=1	2	4	4	4	19.6	19.6	19.6	38.834	337	337;308	NaN	1.1616	NaN	NaN	NaN	NaN	1.3762	NaN	NaN	1.358	NaN	NaN	1.4958	1.4027	NaN	NaN	NaN	1.226	NaN	1.7618	NaN	NaN	NaN	NaN	NaN	NaN	NaN	NaN	NaN	NaN	NaN	NaN
Q14155-1;B1ALK7;B7Z6G2;Q14155-5;Q14155;Q14155-6;Q14155-2;Q14155-3;E7EUY6;E9PDQ5;Q15052;E7EU80;Q15052-2;B7Z3C7;C9JDI6;B1ANY6;E7ENL8	Q14155-1;B1ALK7;B7Z6G2;Q14155-5;Q14155;Q14155-6;Q14155-2;Q14155-3;E7EUY6;E9PDQ5	9;9;9;9;7;7;7;7;6;5;2;2;2;2;1;1;1	9;9;9;9;7;7;7;7;6;5;2;2;2;2;1;1;1	9;9;9;9;7;7;7;7;6;5;2;2;2;2;1;1;1	Rho guanine nucleotide exchange factor 7	ARHGEF7	>sp|Q14155-1|ARHG7_HUMAN Isoform 1 of Rho guanine nucleotide exchange factor 7 OS=Homo sapiens GN=ARHGEF7;>tr|B1ALK7|B1ALK7_HUMAN Rho guanine nucleotide exchange factor 7 OS=Homo sapiens GN=ARHGEF7 PE=2 SV=1;>tr|B7Z6G2|B7Z6G2_HUMAN Rho guanine nucleotide e	17	9	9	9	19	19	19	73.139	646	646;705;721;731;803;625;753;782;447;547;776;151;622;649;61;66;143	NaN	1.4827	NaN	NaN	NaN	NaN	NaN	NaN	NaN	NaN	1.2065	NaN	NaN	NaN	NaN	NaN	1.1066	NaN	0.89201	1.0084	NaN	NaN	NaN	NaN	NaN	NaN	NaN	NaN	NaN	NaN	NaN	NaN
Q9P0T7;B1ALM5;Q9NQ34;Q7Z649	Q9P0T7;B1ALM5	3;3;1;1	3;3;1;1	3;3;1;1	Transmembrane protein 9	TMEM9	>sp|Q9P0T7|TMEM9_HUMAN Transmembrane protein 9 OS=Homo sapiens GN=TMEM9 PE=1 SV=1;>tr|B1ALM5|B1ALM5_HUMAN Transmembrane protein 9 OS=Homo sapiens GN=TMEM9 PE=4 SV=1	4	3	3	3	18.6	18.6	18.6	20.574	183	183;186;198;124	NaN	NaN	NaN	NaN	NaN	NaN	NaN	NaN	NaN	NaN	NaN	NaN	NaN	NaN	NaN	NaN	NaN	NaN	NaN	NaN	NaN	NaN	NaN	NaN	NaN	NaN	NaN	NaN	NaN	NaN	NaN	NaN
Q14141;Q14141-2;Q14141-4;B1AMS2;F5H1J5;B4E049;Q14141-3	Q14141;Q14141-2;Q14141-4;B1AMS2;F5H1J5;B4E049	16;16;16;16;16;12;7	16;16;16;16;16;12;7	9;9;9;9;9;6;5	Septin-6	2006-09-01	>sp|Q14141|SEPT6_HUMAN Septin-6 OS=Homo sapiens GN=SEPT6 PE=1 SV=4;>sp|Q14141-2|SEPT6_HUMAN Isoform I of Septin-6 OS=Homo sapiens GN=SEPT6;>sp|Q14141-4|SEPT6_HUMAN Isoform V of Septin-6 OS=Homo sapiens GN=SEPT6;>tr|B1AMS2|B1AMS2_HUMAN Septin 6, isoform CRA	7	16	16	9	46.8	46.8	32.5	49.716	434	434;427;429;431;457;369;267	1.0366	1.0893	1.1193	1.0754	1.2162	1.3348	1.1228	1.1227	1.104	1.0994	1.1072	1.2119	1.0686	1.2594	1.3181	1.0831	1.2797	1.1625	0.82152	1.2661	0.88935	1.1689	1.2009	1.1604	0.83591	1.2811	1.1822	1.2929	1.2608	1.0536	1.0485	1.389
P19256-3;P19256;P19256-2;B1AMW1;H0YDI1	P19256-3;P19256;P19256-2;B1AMW1	3;3;3;3;1	3;3;3;3;1	3;3;3;3;1	Lymphocyte function-associated antigen 3	CD58	>sp|P19256-3|LFA3_HUMAN Isoform 3 of Lymphocyte function-associated antigen 3 OS=Homo sapiens GN=CD58;>sp|P19256|LFA3_HUMAN Lymphocyte function-associated antigen 3 OS=Homo sapiens GN=CD58 PE=1 SV=1;>sp|P19256-2|LFA3_HUMAN Isoform 2 of Lymphocyte function-	5	3	3	3	13.7	13.7	13.7	27.96	248	248;250;237;240;131	NaN	NaN	NaN	NaN	NaN	NaN	NaN	NaN	NaN	NaN	NaN	NaN	NaN	NaN	NaN	NaN	NaN	NaN	1.0462	NaN	NaN	NaN	NaN	NaN	NaN	NaN	NaN	NaN	NaN	1.2115	NaN	NaN
Q16774;B1ANH5;B1ANH0;Q16774-2;B1ANG9;B1ANH1;B1ANH6;B1ANH2;B1ANH3	Q16774;B1ANH5;B1ANH0;Q16774-2;B1ANG9;B1ANH1;B1ANH6;B1ANH2;B1ANH3	5;5;4;4;4;4;4;4;4	5;5;4;4;4;4;4;4;4	5;5;4;4;4;4;4;4;4	Guanylate kinase	GUK1	>sp|Q16774|KGUA_HUMAN Guanylate kinase OS=Homo sapiens GN=GUK1 PE=1 SV=2;>tr|B1ANH5|B1ANH5_HUMAN Guanylate kinase OS=Homo sapiens GN=GUK1 PE=4 SV=1;>tr|B1ANH0|B1ANH0_HUMAN Guanylate kinase (Fragment) OS=Homo sapiens GN=GUK1 PE=4 SV=1;>sp|Q16774-2|KGUA_HUMA	9	5	5	5	36	36	36	21.725	197	197;199;217;218;218;241;242;253;272	NaN	NaN	NaN	NaN	NaN	NaN	NaN	NaN	NaN	NaN	NaN	NaN	NaN	NaN	NaN	NaN	NaN	NaN	NaN	NaN	NaN	NaN	NaN	NaN	NaN	NaN	NaN	NaN	NaN	NaN	NaN	NaN
P08174;P08174-2;H3BLV0;Q14UF5;E9PSH2;Q14UF4;Q14UF6;B1AP13;B1AP15;H7BY55	P08174;P08174-2;H3BLV0;Q14UF5;E9PSH2;Q14UF4;Q14UF6;B1AP13;B1AP15	13;13;13;13;13;13;13;13;9;4	13;13;13;13;13;13;13;13;9;4	13;13;13;13;13;13;13;13;9;4	Complement decay-accelerating factor	CD55	>sp|P08174|DAF_HUMAN Complement decay-accelerating factor OS=Homo sapiens GN=CD55 PE=1 SV=4;>sp|P08174-2|DAF_HUMAN Isoform 1 of Complement decay-accelerating factor OS=Homo sapiens GN=CD55;>tr|H3BLV0|H3BLV0_HUMAN Complement decay-accelerating factor (Fragm	10	13	13	13	46.7	46.7	46.7	41.4	381	381;440;326;364;377;384;439;444;317;129	0.65176	0.66977	0.76528	0.71217	1.0472	1.0102	0.9355	0.91136	1.189	0.90787	0.93679	1.0191	1.0135	0.89388	0.60997	0.97699	0.78836	1.1281	1.1008	1.0262	0.92735	1.0326	1.2665	1.0753	0.80615	1.1118	1.0443	1.0174	0.94684	1.0638	1.2348	1.3262
P22415;H0YD59;E9PME6;Q7Z5Y1;B1AQP1	P22415;H0YD59;E9PME6;Q7Z5Y1;B1AQP1	2;2;2;2;2	1;1;1;1;1	1;1;1;1;1	Upstream stimulatory factor 1	USF1;usf1-bd	>sp|P22415|USF1_HUMAN Upstream stimulatory factor 1 OS=Homo sapiens GN=USF1 PE=1 SV=1;>tr|H0YD59|H0YD59_HUMAN Upstream stimulatory factor 1 (Fragment) OS=Homo sapiens GN=USF1 PE=4 SV=1;>tr|E9PME6|E9PME6_HUMAN Upstream stimulatory factor 1 (Fragment) OS=Hom	5	2	1	1	6.8	3.5	3.5	33.538	310	310;165;218;251;282	NaN	NaN	NaN	NaN	NaN	NaN	NaN	NaN	NaN	NaN	NaN	NaN	NaN	NaN	NaN	NaN	NaN	NaN	NaN	NaN	NaN	NaN	NaN	NaN	NaN	NaN	NaN	NaN	NaN	NaN	NaN	NaN
P07602;B1AVU8;P07602-2;C9JIZ6;P07602-3	P07602;B1AVU8;P07602-2;C9JIZ6;P07602-3	21;21;20;20;20	21;21;20;20;20	21;21;20;20;20	Proactivator polypeptide;Saposin-A;Saposin-B-Val;Saposin-B;Saposin-C;Saposin-D	PSAP	>sp|P07602|SAP_HUMAN Proactivator polypeptide OS=Homo sapiens GN=PSAP PE=1 SV=2;>tr|B1AVU8|B1AVU8_HUMAN Saposin-D OS=Homo sapiens GN=PSAP PE=2 SV=1;>sp|P07602-2|SAP_HUMAN Isoform Sap-mu-6 of Proactivator polypeptide OS=Homo sapiens GN=PSAP;>tr|C9JIZ6|C9JIZ	5	21	21	21	43.7	43.7	43.7	58.112	524	524;559;526;526;527	0.95779	1.0088	1.143	1.0259	1.1472	1.2116	1.1457	1.0852	1.1484	1.0599	1.072	1.1464	1.0841	1.0862	1.1834	1.0081	1.1175	1.0403	0.93796	1.1348	1.1205	1.0827	1.2261	1.1157	1.0989	1.0951	1.1261	1.2568	1.1977	1.2003	1.2331	1.293
Q03518;B1AZV3;F5H648	Q03518;B1AZV3;F5H648	11;11;8	11;11;8	11;11;8	Antigen peptide transporter 1	TAP1	>sp|Q03518|TAP1_HUMAN Antigen peptide transporter 1 OS=Homo sapiens GN=TAP1 PE=1 SV=2;>tr|B1AZV3|B1AZV3_HUMAN Antigen peptide transporter 1 OS=Homo sapiens GN=TAP1 PE=2 SV=1;>tr|F5H648|F5H648_HUMAN Antigen peptide transporter 1 OS=Homo sapiens GN=TAP1 PE=3	3	11	11	11	23.1	23.1	23.1	87.217	808	808;808;547	NaN	NaN	NaN	NaN	NaN	NaN	0.9981	NaN	NaN	NaN	0.83818	NaN	NaN	NaN	NaN	NaN	NaN	NaN	NaN	NaN	1.0786	0.9203	0.71584	1.0028	0.96013	0.82384	1.1612	1.1828	NaN	0.83847	0.83883	0.99801
B2R5P6;E2QRB9;B7Z2S5;E7EW10;B7Z904;Q16881;Q16881-3;Q16881-5;Q16881-2;Q16881-4;E9PNQ6;Q16881-6;E9PIR7;E7ESI6;F5H780;E9PMY9;E9PKD3;E9PIZ5;E9PLT3;E9PKI4;E9PQI3;E9PRI8;E9PJU2	B2R5P6;E2QRB9;B7Z2S5;E7EW10;B7Z904;Q16881;Q16881-3;Q16881-5;Q16881-2;Q16881-4;E9PNQ6;Q16881-6;E9PIR7;E7ESI6;F5H780;E9PMY9;E9PKD3	25;25;25;25;25;24;24;24;24;24;24;24;23;23;21;20;13;7;5;5;4;1;1	25;25;25;25;25;24;24;24;24;24;24;24;23;23;21;20;13;7;5;5;4;1;1	24;24;24;24;24;23;23;23;23;23;23;23;22;22;20;19;12;6;4;4;4;1;1	Thioredoxin reductase 1, cytoplasmic	TXNRD1	>tr|B2R5P6|B2R5P6_HUMAN Thioredoxin reductase 1, cytoplasmic OS=Homo sapiens GN=TXNRD1 PE=2 SV=1;>tr|E2QRB9|E2QRB9_HUMAN Thioredoxin reductase 1, cytoplasmic OS=Homo sapiens GN=TXNRD1 PE=2 SV=1;>tr|B7Z2S5|B7Z2S5_HUMAN Thioredoxin reductase 1, cytoplasmic O	23	25	25	24	64	64	61	54.546	497	497;541;547;612;647;649;598;499;543;551;568;614;482;581;459;461;175;139;70;72;53;44;96	0.9244	1.0498	1.1787	1.0899	1.2012	1.2453	1.1517	1.0775	1.1773	1.153	1.1472	1.1556	1.1385	1.2132	1.2365	1.0675	1.0182	1.1289	1.0171	1.1733	1.1852	1.0901	1.1716	1.135	0.90152	1.1179	1.1499	1.1415	1.1734	1.0706	1.1978	1.1786
Q6NYC1;B2WTI3;B2WTI4;Q6NYC1-2;K7EJU9;Q6NYC1-3	Q6NYC1;B2WTI3;B2WTI4;Q6NYC1-2;K7EJU9;Q6NYC1-3	11;11;11;11;11;11	11;11;11;11;11;11	11;11;11;11;11;11	Bifunctional arginine demethylase and lysyl-hydroxylase JMJD6	JMJD6	>sp|Q6NYC1|JMJD6_HUMAN Bifunctional arginine demethylase and lysyl-hydroxylase JMJD6 OS=Homo sapiens GN=JMJD6 PE=1 SV=1;>tr|B2WTI3|B2WTI3_HUMAN Bifunctional arginine demethylase and lysyl-hydroxylase JMJD6 OS=Homo sapiens GN=JMJD6 PE=2 SV=1;>tr|B2WTI4|B2WT	6	11	11	11	39.2	39.2	39.2	46.461	403	403;335;361;372;395;414	0.83312	1.0751	1.1464	1.0278	0.98745	1.0486	1.0708	0.97336	0.97024	0.94849	1.0293	1.0657	0.92508	0.90771	1.0003	0.96483	0.98567	0.97669	1.0693	1.5449	1.3318	1.159	NaN	1.1345	NaN	NaN	1.0773	1.2869	1.1926	NaN	1.037	1.2063
Q53GS7;Q53GS7-2;B3KMG0	Q53GS7;Q53GS7-2;B3KMG0	2;2;2	2;2;2	2;2;2	Nucleoporin GLE1	GLE1	>sp|Q53GS7|GLE1_HUMAN Nucleoporin GLE1 OS=Homo sapiens GN=GLE1 PE=1 SV=2;>sp|Q53GS7-2|GLE1_HUMAN Isoform 2 of Nucleoporin GLE1 OS=Homo sapiens GN=GLE1;>tr|B3KMG0|B3KMG0_HUMAN Nucleoporin GLE1 OS=Homo sapiens GN=GLE1 PE=2 SV=1	3	2	2	2	5.4	5.4	5.4	79.835	698	698;659;444	NaN	NaN	NaN	NaN	NaN	NaN	NaN	NaN	NaN	NaN	NaN	NaN	NaN	NaN	NaN	NaN	NaN	NaN	NaN	NaN	NaN	NaN	NaN	NaN	NaN	NaN	NaN	NaN	NaN	NaN	NaN	NaN
B3KNJ4	B3KNJ4	19	1	1		SAE1	>tr|B3KNJ4|B3KNJ4_HUMAN SUMO-1 activating enzyme subunit 1, isoform CRA_a OS=Homo sapiens GN=SAE1 PE=2 SV=1	1	19	1	1	63.5	4.7	4.7	33.384	299	299	NaN	NaN	NaN	NaN	NaN	NaN	NaN	NaN	NaN	NaN	NaN	NaN	NaN	NaN	NaN	NaN	NaN	NaN	NaN	NaN	NaN	NaN	NaN	NaN	NaN	NaN	NaN	NaN	NaN	NaN	NaN	NaN
P55209;F8VY35;B3KNT8;F5H4R6;F8VUX1;F8W0J6;H0YIV4;F8VV59;B3KV44;B7Z9C2;F8W020;F8VXI6;F8W118;F5H1X5;H0YH88;H0YHC3;F8VVB5;F8VRJ2;F8VUC3;B7Z4K9	P55209;F8VY35;B3KNT8;F5H4R6;F8VUX1;F8W0J6;H0YIV4;F8VV59;B3KV44;B7Z9C2;F8W020;F8VXI6;F8W118	15;15;15;15;14;14;14;12;11;11;9;9;8;7;7;7;6;5;5;5	13;13;13;13;12;12;12;10;9;9;7;7;6;5;5;5;4;3;5;5	4;4;4;4;4;4;3;1;1;1;4;4;1;4;0;1;3;1;0;0	Nucleosome assembly protein 1-like 1	NAP1L1	>sp|P55209|NP1L1_HUMAN Nucleosome assembly protein 1-like 1 OS=Homo sapiens GN=NAP1L1 PE=1 SV=1;>tr|F8VY35|F8VY35_HUMAN Nucleosome assembly protein 1-like 1 (Fragment) OS=Homo sapiens GN=NAP1L1 PE=2 SV=1;>tr|B3KNT8|B3KNT8_HUMAN Nucleosome assembly protein	20	15	13	4	53.2	50.4	17.1	45.374	391	391;264;368;383;237;379;385;327;323;349;207;215;209;131;177;198;161;114;200;208	0.92965	1.2812	1.062	1.218	1.2873	1.2085	1.0448	1.2445	1.3555	1.1429	1.3628	1.425	1.4769	1.3207	1.464	1.4188	1.3497	1.4436	0.9783	1.4812	1.6571	1.6272	1.3815	1.7589	1.1257	1.5817	1.5689	1.6582	1.6198	1.6309	1.318	1.7218
B3KQ59;M0R0Y3;M0QXI6;REV__H3BUW6;REV__H3BN64;REV__Q96K21-4;REV__H3BRM1;REV__Q96K21-3;REV__H3BRF9;REV__Q96K21-2;REV__Q96K21	B3KQ59;M0R0Y3	27;18;5;1;1;1;1;1;1;1;1	1;1;1;1;1;1;1;1;1;1;1	0;0;0;0;0;0;0;0;0;0;0		RUVBL2	>tr|B3KQ59|B3KQ59_HUMAN RuvB-like 2 OS=Homo sapiens GN=RUVBL2 PE=2 SV=1;>tr|M0R0Y3|M0R0Y3_HUMAN RuvB-like 2 OS=Homo sapiens GN=RUVBL2 PE=4 SV=1	11	27	1	0	63.9	1.7	0	46.306	418	418;354;109;57;271;296;307;403;448;461;471	NaN	NaN	NaN	NaN	NaN	NaN	NaN	NaN	NaN	NaN	NaN	NaN	NaN	NaN	NaN	NaN	NaN	NaN	NaN	NaN	NaN	NaN	NaN	NaN	NaN	NaN	NaN	NaN	NaN	NaN	NaN	NaN
Q99808;B3KQV7	Q99808;B3KQV7	4;4	4;4	4;4	Equilibrative nucleoside transporter 1	SLC29A1	>sp|Q99808|S29A1_HUMAN Equilibrative nucleoside transporter 1 OS=Homo sapiens GN=SLC29A1 PE=1 SV=3;>tr|B3KQV7|B3KQV7_HUMAN Equilibrative nucleoside transporter 1 OS=Homo sapiens GN=SLC29A1 PE=2 SV=1	2	4	4	4	15.6	15.6	15.6	50.219	456	456;535	NaN	NaN	NaN	NaN	NaN	NaN	NaN	NaN	NaN	NaN	1.1803	NaN	NaN	NaN	NaN	NaN	NaN	1.631	NaN	NaN	NaN	NaN	NaN	NaN	NaN	NaN	NaN	NaN	NaN	NaN	NaN	NaN
Q9H0E2;E9PP67;E9PQ25;B3KXC6;F2Z2Y8;B3KR28;E7EN89	Q9H0E2;E9PP67;E9PQ25;B3KXC6;F2Z2Y8;B3KR28;E7EN89	1;1;1;1;1;1;1	1;1;1;1;1;1;1	1;1;1;1;1;1;1	Toll-interacting protein	TOLLIP	>sp|Q9H0E2|TOLIP_HUMAN Toll-interacting protein OS=Homo sapiens GN=TOLLIP PE=1 SV=1;>tr|E9PP67|E9PP67_HUMAN Toll-interacting protein OS=Homo sapiens GN=TOLLIP PE=2 SV=1;>tr|E9PQ25|E9PQ25_HUMAN Toll-interacting protein (Fragment) OS=Homo sapiens GN=TOLLIP P	7	1	1	1	4.7	4.7	4.7	30.281	274	274;179;186;205;213;224;246	NaN	NaN	NaN	NaN	NaN	NaN	NaN	NaN	NaN	NaN	NaN	NaN	NaN	NaN	NaN	NaN	NaN	NaN	NaN	NaN	NaN	NaN	NaN	NaN	NaN	NaN	1.115	NaN	NaN	NaN	NaN	NaN
P07992;B3KRR0;P07992-2	P07992;B3KRR0;P07992-2	1;1;1	1;1;1	1;1;1	DNA excision repair protein ERCC-1	ERCC1	>sp|P07992|ERCC1_HUMAN DNA excision repair protein ERCC-1 OS=Homo sapiens GN=ERCC1 PE=1 SV=1;>tr|B3KRR0|B3KRR0_HUMAN DNA excision repair protein ERCC-1 OS=Homo sapiens GN=ERCC1 PE=2 SV=1;>sp|P07992-2|ERCC1_HUMAN Isoform 2 of DNA excision repair protein ERC	3	1	1	1	3.7	3.7	3.7	32.562	297	297;225;273	NaN	NaN	NaN	NaN	NaN	NaN	NaN	NaN	NaN	NaN	NaN	NaN	NaN	NaN	NaN	NaN	NaN	NaN	NaN	NaN	NaN	NaN	NaN	NaN	NaN	NaN	NaN	NaN	NaN	NaN	NaN	NaN
O15372;B3KS98;E5RGU4;E5RFW7;E5RFH0;E5RHC7;E5RH59	O15372;B3KS98	17;17;5;2;2;1;1	17;17;5;2;2;1;1	8;8;2;2;2;1;1	Eukaryotic translation initiation factor 3 subunit H	EIF3H;EIF3S3	>sp|O15372|EIF3H_HUMAN Eukaryotic translation initiation factor 3 subunit H OS=Homo sapiens GN=EIF3H PE=1 SV=1;>tr|B3KS98|B3KS98_HUMAN Eukaryotic translation initiation factor 3 subunit H OS=Homo sapiens GN=EIF3S3 PE=2 SV=1	7	17	17	8	54.3	54.3	34.4	39.93	352	352;366;235;97;170;46;56	0.96442	1.4505	1.3123	1.211	1.26	1.3657	1.3745	1.2519	1.3349	1.2972	1.3733	1.241	1.3486	1.442	1.4874	1.1016	1.4263	1.1606	0.85876	1.2041	1.6676	1.0441	1.5066	1.156	0.89788	1.4673	1.2487	1.4249	1.2233	1.1351	1.1279	1.4977
P49356;B3KSC2;B4E1A0;B4DL54;H0YHI0	P49356;B3KSC2;B4E1A0;B4DL54;H0YHI0	2;2;2;2;2	2;2;2;2;2	2;2;2;2;2	Protein farnesyltransferase subunit beta	FNTB;CHURC1-FNTB	>sp|P49356|FNTB_HUMAN Protein farnesyltransferase subunit beta OS=Homo sapiens GN=FNTB PE=1 SV=1;>tr|B3KSC2|B3KSC2_HUMAN Protein CHURC1-FNTB OS=Homo sapiens GN=CHURC1-FNTB PE=2 SV=1;>tr|B4E1A0|B4E1A0_HUMAN Protein CHURC1-FNTB OS=Homo sapiens GN=CHURC1-FNTB	5	2	2	2	6.4	6.4	6.4	48.773	437	437;193;391;471;472	NaN	0.88324	0.72541	NaN	0.86257	0.76983	0.92101	NaN	NaN	NaN	0.66382	NaN	NaN	NaN	0.75573	NaN	1.0002	NaN	NaN	NaN	NaN	NaN	NaN	NaN	NaN	NaN	NaN	NaN	NaN	NaN	NaN	NaN
O00303;B3KSH1;B4DEW9;H0YDT6;E9PQV8	O00303;B3KSH1;B4DEW9	12;12;9;2;2	12;12;9;2;2	12;12;9;2;2	Eukaryotic translation initiation factor 3 subunit F	EIF3F	>sp|O00303|EIF3F_HUMAN Eukaryotic translation initiation factor 3 subunit F OS=Homo sapiens GN=EIF3F PE=1 SV=1;>tr|B3KSH1|B3KSH1_HUMAN Eukaryotic translation initiation factor 3 subunit F OS=Homo sapiens GN=EIF3F PE=2 SV=1;>tr|B4DEW9|B4DEW9_HUMAN Eukaryoti	5	12	12	12	40.3	40.3	40.3	37.563	357	357;372;208;100;124	0.95989	1.0545	1.0667	1.0592	1.0854	1.0517	1.0421	1.0006	1.0798	1.0491	1.0644	1.0562	1.0337	1.0909	1.1739	0.99496	1.0212	1.075	1.0636	1.1996	1.1004	1.1043	1.1654	1.149	0.99094	1.1178	1.034	1.0788	1.1519	1.0223	1.0808	1.0988
B3KSQ1	B3KSQ1	10	10	2		TECR	>tr|B3KSQ1|B3KSQ1_HUMAN Very-long-chain enoyl-CoA reductase OS=Homo sapiens GN=TECR PE=2 SV=1	1	10	10	2	29.4	29.4	6.2	37.467	323	323	0.94645	0.84124	0.97966	1.0973	0.99431	0.7829	0.97559	0.9256	0.99725	1.015	1.0565	0.85698	1.0948	1.0066	0.56455	1.0032	0.66144	0.81857	1.1207	1.1339	1.1195	1.0599	1.1613	0.94697	0.92248	1.0671	0.99317	1.0761	1.1385	1.0837	0.94869	1.2128
O75925;B3KSY9;O75928;H3BSI8;B4DGW0;O75928-3;K7ERV6;Q2TA77;O75928-2	O75925;B3KSY9;O75928;H3BSI8;B4DGW0;O75928-3;K7ERV6;Q2TA77;O75928-2	2;2;1;1;1;1;1;1;1	2;2;1;1;1;1;1;1;1	2;2;1;1;1;1;1;1;1	E3 SUMO-protein ligase PIAS1;E3 SUMO-protein ligase PIAS2	PIAS1;PIAS2	>sp|O75925|PIAS1_HUMAN E3 SUMO-protein ligase PIAS1 OS=Homo sapiens GN=PIAS1 PE=1 SV=2;>tr|B3KSY9|B3KSY9_HUMAN E3 SUMO-protein ligase PIAS1 OS=Homo sapiens GN=PIAS1 PE=2 SV=1;>sp|O75928|PIAS2_HUMAN E3 SUMO-protein ligase PIAS2 OS=Homo sapiens GN=PIAS2 PE=1	9	2	2	2	4.3	4.3	4.3	71.835	651	651;653;621;160;282;405;498;507;572	NaN	NaN	NaN	NaN	NaN	NaN	NaN	NaN	NaN	NaN	NaN	NaN	NaN	NaN	NaN	NaN	NaN	NaN	NaN	NaN	NaN	NaN	NaN	NaN	NaN	NaN	NaN	NaN	NaN	NaN	NaN	NaN
H0YLJ3;Q9UBU8-2;B3KTM8;Q9UBU8;H0YMJ0;Q9UBU8-3;H0YM21;H0YMT8;H0YNE0;H0YLV1;H0YNX3	H0YLJ3;Q9UBU8-2;B3KTM8;Q9UBU8;H0YMJ0;Q9UBU8-3;H0YM21	8;8;8;7;7;5;4;3;3;2;1	6;6;6;5;6;3;3;3;3;2;1	6;6;6;5;6;3;3;3;3;2;1	Mortality factor 4-like protein 1	MORF4L1	>tr|H0YLJ3|H0YLJ3_HUMAN Mortality factor 4-like protein 1 OS=Homo sapiens GN=MORF4L1 PE=2 SV=1;>sp|Q9UBU8-2|MO4L1_HUMAN Isoform 2 of Mortality factor 4-like protein 1 OS=Homo sapiens GN=MORF4L1;>tr|B3KTM8|B3KTM8_HUMAN Mortality factor 4-like protein 1 OS=H	11	8	6	6	38.7	29.4	29.4	31.333	269	269;323;348;362;245;235;156;119;213;113;74	NaN	NaN	NaN	NaN	NaN	NaN	NaN	NaN	NaN	NaN	NaN	NaN	NaN	NaN	NaN	NaN	NaN	NaN	NaN	NaN	NaN	NaN	NaN	NaN	NaN	NaN	NaN	NaN	1.42	NaN	NaN	NaN
P04179;B3KUK2;P04179-2;F5H3C5;F5H4R2;F5GYZ5;G8JLJ2;B4E3K9;G5E9P6;F5GXZ9	P04179;B3KUK2;P04179-2;F5H3C5;F5H4R2;F5GYZ5;G8JLJ2;B4E3K9	8;8;7;6;6;6;4;4;1;1	8;8;7;6;6;6;4;4;1;1	8;8;7;6;6;6;4;4;1;1	Superoxide dismutase [Mn], mitochondrial;Superoxide dismutase	SOD2	>sp|P04179|SODM_HUMAN Superoxide dismutase [Mn], mitochondrial OS=Homo sapiens GN=SOD2 PE=1 SV=2;>tr|B3KUK2|B3KUK2_HUMAN Superoxide dismutase OS=Homo sapiens GN=SOD2 PE=2 SV=1;>sp|P04179-2|SODM_HUMAN Isoform 2 of Superoxide dismutase [Mn], mitochondrial OS	10	8	8	8	39.2	39.2	39.2	24.722	222	222;176;183;111;183;190;61;162;140;141	0.83311	NaN	NaN	NaN	NaN	NaN	NaN	NaN	NaN	1.1862	0.76309	NaN	1.2673	1.1842	0.97944	1.2465	1.009	1.3263	0.95343	1.039	1.0714	1.2077	1.5854	1.1818	0.9815	1.0905	1.1874	1.1237	1.2369	1.0327	1.0768	1.263
Q9BUL5;I3L4Q4;B3KVH8;Q9BUL5-2;I3L0Y2;I3L410;I3L1N0;B4DLK6	Q9BUL5;I3L4Q4;B3KVH8;Q9BUL5-2;I3L0Y2	3;3;3;2;2;1;1;1	3;3;3;2;2;1;1;1	3;3;3;2;2;1;1;1	PHD finger protein 23	PHF23	>sp|Q9BUL5|PHF23_HUMAN PHD finger protein 23 OS=Homo sapiens GN=PHF23 PE=1 SV=1;>tr|I3L4Q4|I3L4Q4_HUMAN PHD finger protein 23 (Fragment) OS=Homo sapiens GN=PHF23 PE=2 SV=1;>tr|B3KVH8|B3KVH8_HUMAN PHD finger protein 23 OS=Homo sapiens GN=PHF23 PE=2 SV=1;>sp	8	3	3	3	9.4	9.4	9.4	43.818	403	403;203;399;158;186;201;273;336	NaN	NaN	NaN	NaN	NaN	NaN	NaN	NaN	NaN	NaN	NaN	NaN	NaN	NaN	NaN	NaN	NaN	NaN	NaN	NaN	NaN	NaN	NaN	NaN	NaN	NaN	NaN	NaN	NaN	NaN	NaN	NaN
Q8TBK6-2;Q8TBK6;B3KVL5	Q8TBK6-2;Q8TBK6;B3KVL5	1;1;1	1;1;1	1;1;1	Zinc finger CCHC domain-containing protein 10	ZCCHC10	>sp|Q8TBK6-2|ZCH10_HUMAN Isoform 2 of Zinc finger CCHC domain-containing protein 10 OS=Homo sapiens GN=ZCCHC10;>sp|Q8TBK6|ZCH10_HUMAN Zinc finger CCHC domain-containing protein 10 OS=Homo sapiens GN=ZCCHC10 PE=2 SV=1;>tr|B3KVL5|B3KVL5_HUMAN Zinc finger CCH	3	1	1	1	8.2	8.2	8.2	18.409	170	170;192;186	NaN	NaN	NaN	NaN	NaN	NaN	NaN	NaN	NaN	NaN	NaN	NaN	NaN	NaN	NaN	NaN	NaN	NaN	NaN	NaN	NaN	NaN	NaN	NaN	NaN	NaN	NaN	NaN	NaN	NaN	NaN	NaN
P14678;P63162;P14678-2;B3KVR1;J3QLE5;P14678-3;J3KRY3	P14678;P63162;P14678-2;B3KVR1;J3QLE5;P14678-3;J3KRY3	8;8;8;8;8;8;5	8;8;8;8;8;8;5	8;8;8;8;8;8;5	Small nuclear ribonucleoprotein-associated proteins B and B;Small nuclear ribonucleoprotein-associated protein N;Small nuclear ribonucleoprotein-associated protein	SNRPB;SNRPN	>sp|P14678|RSMB_HUMAN Small nuclear ribonucleoprotein-associated proteins B and B OS=Homo sapiens GN=SNRPB PE=1 SV=2;>sp|P63162|RSMN_HUMAN Small nuclear ribonucleoprotein-associated protein N OS=Homo sapiens GN=SNRPN PE=1 SV=1;>sp|P14678-2|RSMB_HUMAN Isof	7	8	8	8	26.7	26.7	26.7	24.61	240	240;240;231;244;169;289;59	0.94178	1.0483	1.1125	1.0658	1.1091	1.1933	1.1298	1.0122	1.117	1.048	1.1154	1.0729	1.0518	1.1205	1.1208	1.0425	1.0281	1.0315	0.94141	1.1977	1.1336	1.2536	1.1352	1.1632	0.73881	1.0776	1.0047	1.0542	1.0514	0.95612	1.0947	1.0979
Q9H3R5;B3KVZ3;H0Y9E6;D6RBJ6	Q9H3R5;B3KVZ3;H0Y9E6	5;5;3;1	5;5;3;1	5;5;3;1	Centromere protein H	CENPH	>sp|Q9H3R5|CENPH_HUMAN Centromere protein H OS=Homo sapiens GN=CENPH PE=1 SV=1;>tr|B3KVZ3|B3KVZ3_HUMAN Centromere protein H OS=Homo sapiens GN=CENPH PE=2 SV=1;>tr|H0Y9E6|H0Y9E6_HUMAN Centromere protein H (Fragment) OS=Homo sapiens GN=CENPH PE=4 SV=1	4	5	5	5	26.7	26.7	26.7	28.481	247	247;228;187;98	NaN	NaN	NaN	NaN	NaN	NaN	NaN	NaN	NaN	NaN	NaN	NaN	NaN	NaN	NaN	NaN	NaN	NaN	NaN	NaN	NaN	NaN	NaN	NaN	NaN	NaN	NaN	NaN	NaN	NaN	NaN	NaN
Q8WU10;B3KWN8;B4DEW4;H0YGU0	Q8WU10;B3KWN8;B4DEW4	3;3;2;1	3;3;2;1	3;3;2;1	Pyridine nucleotide-disulfide oxidoreductase domain-containing protein 1	PYROXD1	>sp|Q8WU10|PYRD1_HUMAN Pyridine nucleotide-disulfide oxidoreductase domain-containing protein 1 OS=Homo sapiens GN=PYROXD1 PE=2 SV=1;>tr|B3KWN8|B3KWN8_HUMAN Pyridine nucleotide-disulfide oxidoreductase domain-containing protein 1 OS=Homo sapiens GN=PYROXD1	4	3	3	3	9.8	9.8	9.8	55.792	500	500;429;139;60	NaN	NaN	NaN	NaN	NaN	NaN	NaN	NaN	NaN	NaN	NaN	NaN	NaN	NaN	NaN	NaN	NaN	NaN	NaN	NaN	NaN	NaN	NaN	NaN	NaN	NaN	NaN	NaN	NaN	NaN	NaN	NaN
B3KYA7;Q13188	B3KYA7;Q13188	14;13	14;13	4;3	Serine/threonine-protein kinase 3;Serine/threonine-protein kinase 3 36kDa subunit;Serine/threonine-protein kinase 3 20kDa subunit	STK3	>tr|B3KYA7|B3KYA7_HUMAN Serine/threonine-protein kinase 3 36kDa subunit OS=Homo sapiens GN=STK3 PE=2 SV=1;>sp|Q13188|STK3_HUMAN Serine/threonine-protein kinase 3 OS=Homo sapiens GN=STK3 PE=1 SV=2	2	14	14	4	34.9	34.9	10.2	59.461	519	519;491	1.0688	0.9877	1.286	1.08	1.0238	0.96075	1.0433	NaN	1.0087	0.82484	0.97215	1.2851	0.87568	1.2547	1.0306	1.0417	1.028	1.0633	1.0863	1.2197	1.2265	1.3946	1.0661	1.1572	NaN	1.3508	1.1077	1.1134	1.0065	NaN	0.9645	1.1635
Q99439;B4DDF4;B4DUT8;H3BTZ5;H3BVI6;Q99439-2;H3BQH0;K7ES69;H3BQR6	Q99439;B4DDF4;B4DUT8;H3BTZ5;H3BVI6;Q99439-2;H3BQH0	10;10;10;8;8;7;6;4;2	10;10;10;8;8;7;6;4;2	10;10;10;8;8;7;6;4;2	Calponin-2	CNN2	>sp|Q99439|CNN2_HUMAN Calponin-2 OS=Homo sapiens GN=CNN2 PE=1 SV=4;>tr|B4DDF4|B4DDF4_HUMAN Calponin-2 OS=Homo sapiens GN=CNN2 PE=2 SV=1;>tr|B4DUT8|B4DUT8_HUMAN Calponin-2 OS=Homo sapiens GN=CNN2 PE=2 SV=1;>tr|H3BTZ5|H3BTZ5_HUMAN Calponin-2 (Fragment) OS=Ho	9	10	10	10	42.4	42.4	42.4	33.697	309	309;298;330;191;218;270;212;148;66	0.99337	1.0997	1.2291	0.99265	1.1095	1.2388	1.2007	1.04	1.1584	1.1205	1.1834	1.1771	1.2095	1.2804	1.1909	1.1225	1.1265	1.2269	0.99218	1.2756	1.1745	1.2193	1.3697	1.3075	0.89139	1.3625	1.252	1.1871	1.1384	1.1889	1.289	1.2208
P54619;B4DDT7;Q8N7V9;F8VYY9;H0YHF8;F8VVA3;H0YIC9;F8VZX1;Q9UGJ0;E9PGP6;F8VSH3;F8W046;F8VRY2;F8VU55;F8VSL2;Q9UGJ0-2;G8JLM0;Q9UGJ0-3	P54619;B4DDT7;Q8N7V9;F8VYY9	10;10;10;9;4;4;4;2;1;1;1;1;1;1;1;1;1;1	10;10;10;9;4;4;4;2;1;1;1;1;1;1;1;1;1;1	1;1;1;0;0;1;1;0;0;0;1;1;1;1;1;0;0;0	5-AMP-activated protein kinase subunit gamma-1	PRKAG1	>sp|P54619|AAKG1_HUMAN 5-AMP-activated protein kinase subunit gamma-1 OS=Homo sapiens GN=PRKAG1 PE=1 SV=1;>tr|B4DDT7|B4DDT7_HUMAN 5-AMP-activated protein kinase subunit gamma-1 OS=Homo sapiens GN=PRKAG1 PE=2 SV=1;>tr|Q8N7V9|Q8N7V9_HUMAN 5-AMP-activated	18	10	10	1	34.4	34.4	3	37.579	331	331;299;340;280;93;161;251;203;569;445;69;82;82;91;125;328;444;525	NaN	NaN	NaN	NaN	NaN	NaN	NaN	NaN	NaN	NaN	NaN	NaN	NaN	NaN	NaN	NaN	NaN	NaN	0.98439	1.0133	NaN	NaN	NaN	1.2377	1.0426	NaN	0.99726	1.1628	0.9694	NaN	1.3015	1.3112
P49590;B4DDY8;C9JV49;E9PG66;C9JHI8;B4DQ67;D6RJE6;D6RB22	P49590;B4DDY8;C9JV49;E9PG66;C9JHI8;B4DQ67	15;15;13;12;10;8;5;2	9;9;7;8;6;4;3;2	9;9;7;8;6;4;3;2	Probable histidine--tRNA ligase, mitochondrial	HARS2	>sp|P49590|SYHM_HUMAN Probable histidine--tRNA ligase, mitochondrial OS=Homo sapiens GN=HARS2 PE=1 SV=1;>tr|B4DDY8|B4DDY8_HUMAN Histidyl-tRNA synthetase-like, isoform CRA_a OS=Homo sapiens GN=HARSL PE=2 SV=1;>tr|C9JV49|C9JV49_HUMAN Probable histidine--tRNA	8	15	9	9	28.7	17.2	17.2	56.888	506	506;481;466;432;392;334;181;116	NaN	NaN	NaN	NaN	NaN	NaN	NaN	NaN	NaN	NaN	NaN	NaN	NaN	NaN	NaN	NaN	NaN	NaN	NaN	NaN	NaN	NaN	NaN	NaN	NaN	NaN	NaN	NaN	NaN	NaN	NaN	NaN
Q9H944;B4DE08;B7ZBQ3;A6PVP4	Q9H944;B4DE08;B7ZBQ3;A6PVP4	2;2;2;1	2;2;2;1	2;2;2;1	Mediator of RNA polymerase II transcription subunit 20	MED20	>sp|Q9H944|MED20_HUMAN Mediator of RNA polymerase II transcription subunit 20 OS=Homo sapiens GN=MED20 PE=1 SV=1;>tr|B4DE08|B4DE08_HUMAN Mediator of RNA polymerase II transcription subunit 20 OS=Homo sapiens GN=MED20 PE=2 SV=1;>tr|B7ZBQ3|B7ZBQ3_HUMAN Media	4	2	2	2	18.9	18.9	18.9	23.222	212	212;123;145;140	NaN	NaN	NaN	NaN	NaN	NaN	NaN	NaN	NaN	NaN	NaN	NaN	NaN	NaN	NaN	NaN	NaN	NaN	NaN	NaN	NaN	NaN	NaN	NaN	NaN	NaN	NaN	NaN	NaN	NaN	NaN	NaN
P48651;B4DE85;Q9BUQ5	P48651;B4DE85;Q9BUQ5	5;5;5	5;5;5	5;5;5	Phosphatidylserine synthase 1	PTDSS1	>sp|P48651|PTSS1_HUMAN Phosphatidylserine synthase 1 OS=Homo sapiens GN=PTDSS1 PE=1 SV=1;>tr|B4DE85|B4DE85_HUMAN Phosphatidylserine synthase 1 OS=Homo sapiens GN=PTDSS1 PE=2 SV=1;>tr|Q9BUQ5|Q9BUQ5_HUMAN PTDSS1 protein OS=Homo sapiens GN=PTDSS1 PE=2 SV=2	3	5	5	5	10.1	10.1	10.1	55.527	473	473;301;327	NaN	NaN	NaN	NaN	NaN	NaN	NaN	NaN	1.3014	NaN	NaN	NaN	NaN	NaN	NaN	NaN	NaN	NaN	NaN	NaN	NaN	NaN	NaN	NaN	NaN	NaN	NaN	NaN	NaN	NaN	NaN	NaN
Q96GC9;B4DVV9;K7EPE7;B4DED7;B4DGZ7;F5H2J3	Q96GC9;B4DVV9;K7EPE7;B4DED7;B4DGZ7;F5H2J3	1;1;1;1;1;1	1;1;1;1;1;1	1;1;1;1;1;1	Vacuole membrane protein 1	VMP1	>sp|Q96GC9|VMP1_HUMAN Vacuole membrane protein 1 OS=Homo sapiens GN=VMP1 PE=1 SV=1;>tr|B4DVV9|B4DVV9_HUMAN Vacuole membrane protein 1 OS=Homo sapiens GN=VMP1 PE=2 SV=1;>tr|K7EPE7|K7EPE7_HUMAN Vacuole membrane protein 1 (Fragment) OS=Homo sapiens GN=VMP1 PE	6	1	1	1	7.4	7.4	7.4	46.237	406	406;214;225;272;309;350	NaN	NaN	NaN	NaN	NaN	NaN	NaN	NaN	NaN	NaN	NaN	NaN	NaN	NaN	NaN	NaN	NaN	NaN	NaN	NaN	NaN	NaN	NaN	NaN	NaN	NaN	NaN	NaN	NaN	NaN	NaN	NaN
P43003;B4DF14;P43003-2	P43003;B4DF14;P43003-2	4;4;4	4;4;4	4;4;4	Excitatory amino acid transporter 1	SLC1A3	>sp|P43003|EAA1_HUMAN Excitatory amino acid transporter 1 OS=Homo sapiens GN=SLC1A3 PE=1 SV=1;>tr|B4DF14|B4DF14_HUMAN Excitatory amino acid transporter 1 OS=Homo sapiens GN=SLC1A3 PE=2 SV=1;>sp|P43003-2|EAA1_HUMAN Isoform 2 of Excitatory amino acid transpo	3	4	4	4	12.9	12.9	12.9	59.572	542	542;490;497	NaN	NaN	1.0215	NaN	1.1561	NaN	NaN	0.93294	NaN	1.0849	1.4778	NaN	NaN	NaN	NaN	1.5912	NaN	NaN	0.98467	NaN	NaN	NaN	NaN	NaN	0.75051	0.9031	NaN	1.1339	NaN	NaN	0.99722	0.89418
Q9P0J0;B4DF76;J3KN00;B4DEZ3;K7EJE1;E7ENQ6	Q9P0J0;B4DF76;J3KN00;B4DEZ3;K7EJE1;E7ENQ6	4;4;4;3;3;3	4;4;4;3;3;3	4;4;4;3;3;3	NADH dehydrogenase [ubiquinone] 1 alpha subcomplex subunit 13	NDUFA13;YJEFN3	>sp|Q9P0J0|NDUAD_HUMAN NADH dehydrogenase [ubiquinone] 1 alpha subcomplex subunit 13 OS=Homo sapiens GN=NDUFA13 PE=1 SV=3;>tr|B4DF76|B4DF76_HUMAN NADH dehydrogenase [ubiquinone] 1 alpha subcomplex subunit 13 OS=Homo sapiens GN=NDUFA13 PE=2 SV=1;>tr|J3KN00|	6	4	4	4	30.6	30.6	30.6	16.698	144	144;222;227;120;150;273	0.86412	NaN	NaN	NaN	NaN	NaN	NaN	NaN	1.8477	NaN	NaN	NaN	NaN	NaN	NaN	NaN	NaN	NaN	0.91883	NaN	0.85585	0.84897	0.88949	0.66401	0.60407	0.94702	0.91563	0.9425	0.85283	0.95376	0.7977	0.75306
O60936-2;H3BUP2;H3BUN4;B4DFL0;H3BM67;O60936;J3QLT7;H3BQJ5	O60936-2;H3BUP2;H3BUN4;B4DFL0;H3BM67;O60936	7;7;7;7;6;4;2;2	7;7;7;7;6;4;2;2	7;7;7;7;6;4;2;2	Nucleolar protein 3	NOL3	>sp|O60936-2|NOL3_HUMAN Isoform 2 of Nucleolar protein 3 OS=Homo sapiens GN=NOL3;>tr|H3BUP2|H3BUP2_HUMAN Nucleolar protein 3 (Fragment) OS=Homo sapiens GN=NOL3 PE=2 SV=1;>tr|H3BUN4|H3BUN4_HUMAN Nucleolar protein 3 (Fragment) OS=Homo sapiens GN=NOL3 PE=2 SV	8	7	7	7	56.2	56.2	56.2	22.629	208	208;174;206;270;139;219;131;216	NaN	NaN	NaN	NaN	NaN	NaN	NaN	NaN	NaN	NaN	NaN	NaN	NaN	NaN	NaN	NaN	NaN	NaN	NaN	1.3264	1.2143	0.90567	NaN	NaN	0.99202	1.1728	NaN	NaN	NaN	NaN	1.4055	1.2928
B4DHT5;Q96CM8;B4DFQ6;E9PF16;B4DUF5;D6RF87	B4DHT5;Q96CM8;B4DFQ6;E9PF16;B4DUF5	14;14;14;12;8;6	14;14;14;12;8;6	14;14;14;12;8;6	Acyl-CoA synthetase family member 2, mitochondrial	ACSF2	>tr|B4DHT5|B4DHT5_HUMAN Acyl-CoA synthetase family member 2, mitochondrial OS=Homo sapiens GN=ACSF2 PE=2 SV=1;>sp|Q96CM8|ACSF2_HUMAN Acyl-CoA synthetase family member 2, mitochondrial OS=Homo sapiens GN=ACSF2 PE=1 SV=2;>tr|B4DFQ6|B4DFQ6_HUMAN Acyl-CoA synt	6	14	14	14	32.6	32.6	32.6	66.798	602	602;615;640;572;455;183	NaN	NaN	NaN	NaN	NaN	NaN	NaN	NaN	NaN	NaN	NaN	NaN	NaN	NaN	NaN	NaN	NaN	NaN	1.073	1.2233	NaN	NaN	NaN	NaN	NaN	NaN	NaN	NaN	NaN	NaN	1.4323	NaN
Q6PHR2;Q6PHR2-3;B4DFT0;Q6PHR2-2	Q6PHR2;Q6PHR2-3;B4DFT0;Q6PHR2-2	2;2;2;1	2;2;2;1	2;2;2;1	Serine/threonine-protein kinase ULK3	ULK3	>sp|Q6PHR2|ULK3_HUMAN Serine/threonine-protein kinase ULK3 OS=Homo sapiens GN=ULK3 PE=1 SV=2;>sp|Q6PHR2-3|ULK3_HUMAN Isoform 3 of Serine/threonine-protein kinase ULK3 OS=Homo sapiens GN=ULK3;>tr|B4DFT0|B4DFT0_HUMAN Serine/threonine-protein kinase ULK3 OS=H	4	2	2	2	5.9	5.9	5.9	53.444	472	472;470;483;214	NaN	NaN	NaN	NaN	NaN	NaN	NaN	NaN	NaN	NaN	NaN	NaN	NaN	NaN	NaN	NaN	NaN	NaN	NaN	NaN	NaN	0.7525	NaN	0.95911	NaN	NaN	NaN	NaN	0.66923	NaN	0.76779	NaN
P51812;F5GYC4;B4DG22;B7ZB17;B1AXG1;B1AXG2	P51812;F5GYC4;B4DG22;B7ZB17	29;29;29;29;10;6	19;19;19;19;3;3	15;15;15;15;0;0	Ribosomal protein S6 kinase alpha-3	RPS6KA3	>sp|P51812|KS6A3_HUMAN Ribosomal protein S6 kinase alpha-3 OS=Homo sapiens GN=RPS6KA3 PE=1 SV=1;>tr|F5GYC4|F5GYC4_HUMAN Ribosomal protein S6 kinase alpha-3 OS=Homo sapiens GN=RPS6KA3 PE=2 SV=1;>tr|B4DG22|B4DG22_HUMAN Ribosomal protein S6 kinase alpha-3 OS=	6	29	19	15	46.5	32.4	27.3	83.735	740	740;710;711;712;227;133	0.80633	0.85872	0.90111	1.0603	0.87302	0.94701	1.0593	0.91974	1.3422	1.1594	1.1069	1.3464	0.90912	0.88083	1.3719	0.93285	0.88646	1.1563	0.98035	1.4904	1.2724	1.2095	1.2473	1.0798	0.90767	1.3175	1.527	1.0233	1.0513	1.195	1.3476	1.074
P27824;B4DGP8;B4E2T8;H0Y9Q7;D6RGY2;D6RDP7;D6RB85;D6RFL1;D6RAU8;H0Y9H1;D6RAQ8;D6RHJ3;D6RD16	P27824;B4DGP8;B4E2T8	26;26;21;10;9;8;7;6;6;5;2;1;1	26;26;21;10;9;8;7;6;6;5;2;1;1	26;26;21;10;9;8;7;6;6;5;2;1;1	Calnexin	CANX	>sp|P27824|CALX_HUMAN Calnexin OS=Homo sapiens GN=CANX PE=1 SV=2;>tr|B4DGP8|B4DGP8_HUMAN Calnexin OS=Homo sapiens GN=CANX PE=2 SV=1;>tr|B4E2T8|B4E2T8_HUMAN Calnexin OS=Homo sapiens GN=CANX PE=2 SV=1	13	26	26	26	42.4	42.4	42.4	67.567	592	592;627;484;170;308;168;144;131;134;190;107;79;96	0.93394	0.93664	0.93904	1.0526	1.122	0.81601	1.1276	0.87786	1.0925	1.0772	1.0386	1.0817	1.0997	1.1513	0.69875	1.1607	0.82536	0.93548	0.94513	1.2439	1.2447	1.0703	1.251	1.0727	0.97359	1.106	1.2054	1.2022	1.1534	1.1961	1.0801	1.222
Q9ULH7;Q9ULH7-4;B4DGT8;Q969V6;B0QY84;I3L2S3;Q9ULH7-2;Q9ULH7-3;E7ER32;B0QY83	Q9ULH7;Q9ULH7-4;B4DGT8	4;4;4;1;1;1;1;1;1;1	4;4;4;1;1;1;1;1;1;1	4;4;4;1;1;1;1;1;1;1	MKL/myocardin-like protein 2	MKL2	>sp|Q9ULH7|MKL2_HUMAN MKL/myocardin-like protein 2 OS=Homo sapiens GN=MKL2 PE=1 SV=3;>sp|Q9ULH7-4|MKL2_HUMAN Isoform 4 of MKL/myocardin-like protein 2 OS=Homo sapiens GN=MKL2;>tr|B4DGT8|B4DGT8_HUMAN MKL/myocardin-like 2, isoform CRA_a OS=Homo sapiens GN=MK	10	4	4	4	6	6	6	118.13	1088	1088;1049;1099;931;161;369;378;461;798;881	NaN	NaN	NaN	NaN	NaN	NaN	NaN	NaN	NaN	NaN	NaN	NaN	NaN	NaN	NaN	NaN	NaN	NaN	0.72627	NaN	NaN	NaN	NaN	NaN	NaN	NaN	1.2647	1.0097	1.1891	NaN	NaN	NaN
P48426;B4DGX2;Q5JUT3;H7BXS3;Q5JUT2	P48426;B4DGX2;Q5JUT3	5;5;3;2;1	2;2;2;0;0	2;2;2;0;0	Phosphatidylinositol 5-phosphate 4-kinase type-2 alpha	PIP4K2A	>sp|P48426|PI42A_HUMAN Phosphatidylinositol 5-phosphate 4-kinase type-2 alpha OS=Homo sapiens GN=PIP4K2A PE=1 SV=2;>tr|B4DGX2|B4DGX2_HUMAN Phosphatidylinositol 5-phosphate 4-kinase type-2 alpha OS=Homo sapiens GN=PIP4K2A PE=2 SV=1;>tr|Q5JUT3|Q5JUT3_HUMAN P	5	5	2	2	14.5	6.2	6.2	46.224	406	406;347;215;266;75	NaN	NaN	NaN	NaN	NaN	NaN	NaN	NaN	NaN	NaN	NaN	NaN	NaN	NaN	NaN	NaN	NaN	NaN	NaN	NaN	NaN	NaN	NaN	NaN	NaN	NaN	NaN	NaN	NaN	NaN	NaN	NaN
Q66K74;B4DH53;M0QXQ9;M0QZ50;M0R1M7;M0R1J2	Q66K74;B4DH53	11;11;3;2;2;1	11;11;3;2;2;1	8;8;0;0;2;0	Microtubule-associated protein 1S;MAP1S heavy chain;MAP1S light chain	MAP1S	>sp|Q66K74|MAP1S_HUMAN Microtubule-associated protein 1S OS=Homo sapiens GN=MAP1S PE=1 SV=2;>tr|B4DH53|B4DH53_HUMAN MAP1S light chain OS=Homo sapiens GN=MAP1S PE=2 SV=1	6	11	11	8	16.5	16.5	12.7	112.21	1059	1059;1033;186;93;120;188	NaN	NaN	NaN	NaN	NaN	NaN	NaN	NaN	NaN	NaN	NaN	NaN	NaN	NaN	NaN	NaN	NaN	NaN	0.99513	1.0991	NaN	1.1026	1.2398	0.87901	0.96629	1.0589	1.0436	1.0288	0.89969	NaN	1.7653	NaN
Q9UKB1;Q9UKB1-2;B4DH70;Q9UKB1-3	Q9UKB1;Q9UKB1-2;B4DH70;Q9UKB1-3	3;3;3;3	3;3;3;3	1;1;1;1	F-box/WD repeat-containing protein 11	FBXW11	>sp|Q9UKB1|FBW1B_HUMAN F-box/WD repeat-containing protein 11 OS=Homo sapiens GN=FBXW11 PE=1 SV=1;>sp|Q9UKB1-2|FBW1B_HUMAN Isoform A of F-box/WD repeat-containing protein 11 OS=Homo sapiens GN=FBXW11;>tr|B4DH70|B4DH70_HUMAN F-box/WD repeat-containing protei	4	3	3	1	6.3	6.3	2	62.09	542	542;508;510;529	NaN	NaN	NaN	NaN	NaN	NaN	NaN	NaN	NaN	NaN	NaN	NaN	NaN	NaN	NaN	NaN	NaN	NaN	NaN	NaN	NaN	NaN	NaN	NaN	NaN	NaN	NaN	NaN	NaN	NaN	NaN	NaN
Q9H5N1;B4DHR0;Q9H5N1-2	Q9H5N1;B4DHR0;Q9H5N1-2	3;3;3	3;3;3	3;3;3	Rab GTPase-binding effector protein 2	RABEP2	>sp|Q9H5N1|RABE2_HUMAN Rab GTPase-binding effector protein 2 OS=Homo sapiens GN=RABEP2 PE=1 SV=2;>tr|B4DHR0|B4DHR0_HUMAN Rab GTPase-binding effector protein 2 OS=Homo sapiens GN=RABEP2 PE=2 SV=1;>sp|Q9H5N1-2|RABE2_HUMAN Isoform 2 of Rab GTPase-binding effe	3	3	3	3	6	6	6	63.542	569	569;498;533	NaN	NaN	NaN	NaN	NaN	NaN	NaN	NaN	NaN	NaN	NaN	NaN	NaN	NaN	NaN	NaN	NaN	NaN	NaN	NaN	NaN	NaN	NaN	NaN	NaN	NaN	NaN	NaN	NaN	NaN	NaN	NaN
Q9C005;B4DIS3	Q9C005;B4DIS3	3;3	3;3	3;3	Protein dpy-30 homolog	DPY30;LOC84661	>sp|Q9C005|DPY30_HUMAN Protein dpy-30 homolog OS=Homo sapiens GN=DPY30 PE=1 SV=1;>tr|B4DIS3|B4DIS3_HUMAN Dpy-30-like protein, isoform CRA_b OS=Homo sapiens GN=DPY30 PE=2 SV=1	2	3	3	3	40.4	40.4	40.4	11.25	99	99;120	NaN	NaN	0.771	NaN	NaN	NaN	0.8062	0.88322	NaN	NaN	0.82325	NaN	NaN	NaN	0.98833	0.70767	0.80956	NaN	0.83672	1.3238	NaN	1.2137	NaN	1.2157	0.97346	1.2825	NaN	1.125	1.1037	1.2408	1.3286	NaN
C9J2U4;B4DIY7;Q96BW9;B4E101;H7C1A2;G3V0F3	C9J2U4;B4DIY7;Q96BW9	8;8;7;3;2;1	8;8;7;3;2;1	8;8;7;3;2;1	Mitochondrial translocator assembly and maintenance protein 41 homolog	TAMM41	>tr|C9J2U4|C9J2U4_HUMAN Chromosome 3 open reading frame 31, isoform CRA_f OS=Homo sapiens GN=TAMM41 PE=4 SV=1;>tr|B4DIY7|B4DIY7_HUMAN Mitochondrial translocator assembly and maintenance protein 41 homolog OS=Homo sapiens GN=TAMM41 PE=2 SV=1;>sp|Q96BW9|TAM4	6	8	8	8	40.7	40.7	40.7	38.078	337	337;452;316;151;55;107	NaN	NaN	NaN	NaN	1.0161	0.89548	0.98152	NaN	NaN	NaN	NaN	NaN	NaN	NaN	NaN	NaN	NaN	NaN	NaN	NaN	NaN	NaN	NaN	NaN	NaN	NaN	NaN	NaN	NaN	NaN	NaN	NaN
P20339;B4DJA5;F8VWU4;F8VVZ0;F8VUA5;F8WC93;F8WCY6;F8WD79;F8VPW9;F8VSF8;F8VWZ7	P20339;B4DJA5	8;8;3;3;3;1;1;1;1;1;1	5;5;0;0;0;0;0;0;0;0;0	5;5;0;0;0;0;0;0;0;0;0	Ras-related protein Rab-5A	RAB5A	>sp|P20339|RAB5A_HUMAN Ras-related protein Rab-5A OS=Homo sapiens GN=RAB5A PE=1 SV=2;>tr|B4DJA5|B4DJA5_HUMAN Ras-related protein Rab-5A OS=Homo sapiens GN=RAB5A PE=2 SV=1	11	8	5	5	50.7	35.8	35.8	23.658	215	215;201;92;100;115;61;62;65;73;74;79	0.83918	NaN	NaN	NaN	NaN	0.91176	NaN	NaN	NaN	1.0611	1.0128	NaN	1.1391	NaN	NaN	NaN	0.93144	NaN	NaN	NaN	NaN	NaN	1.0923	NaN	NaN	1.1472	NaN	NaN	NaN	NaN	NaN	NaN
Q96CS7;B4DJB7;Q96CS7-5;Q96CS7-3;B8ZZN1;Q96CS7-2;B7WPA5	Q96CS7;B4DJB7;Q96CS7-5;Q96CS7-3;B8ZZN1;Q96CS7-2;B7WPA5	1;1;1;1;1;1;1	1;1;1;1;1;1;1	1;1;1;1;1;1;1	Pleckstrin homology domain-containing family B member 2	PLEKHB2	>sp|Q96CS7|PKHB2_HUMAN Pleckstrin homology domain-containing family B member 2 OS=Homo sapiens GN=PLEKHB2 PE=1 SV=1;>tr|B4DJB7|B4DJB7_HUMAN Pleckstrin homology domain-containing family B member 2 OS=Homo sapiens GN=PLEKHB2 PE=2 SV=1;>sp|Q96CS7-5|PKHB2_HUMA	7	1	1	1	7.2	7.2	7.2	24.736	222	222;174;178;221;230;309;309	NaN	NaN	NaN	NaN	NaN	NaN	NaN	NaN	NaN	NaN	NaN	NaN	NaN	NaN	NaN	NaN	NaN	NaN	NaN	NaN	NaN	NaN	NaN	NaN	NaN	NaN	NaN	NaN	NaN	NaN	NaN	NaN
Q9BUE6;B4DJI5;Q5TBE2;Q5TBE9	Q9BUE6;B4DJI5;Q5TBE2;Q5TBE9	2;2;1;1	2;2;1;1	2;2;1;1	Iron-sulfur cluster assembly 1 homolog, mitochondrial	ISCA1	>sp|Q9BUE6|ISCA1_HUMAN Iron-sulfur cluster assembly 1 homolog, mitochondrial OS=Homo sapiens GN=ISCA1 PE=2 SV=1;>tr|B4DJI5|B4DJI5_HUMAN HESB like domain containing 2, isoform CRA_b OS=Homo sapiens GN=ISCA1 PE=2 SV=1;>tr|Q5TBE2|Q5TBE2_HUMAN Iron-sulfur clus	4	2	2	2	19.4	19.4	19.4	14.179	129	129;176;31;86	NaN	NaN	NaN	NaN	NaN	NaN	NaN	NaN	NaN	NaN	NaN	NaN	NaN	NaN	NaN	NaN	NaN	NaN	NaN	NaN	NaN	NaN	NaN	NaN	NaN	NaN	NaN	NaN	NaN	NaN	NaN	NaN
Q9NXE8;B4DJK2;B4DZL1;Q9NXE8-2	Q9NXE8;B4DJK2;B4DZL1	3;3;2;1	3;3;2;1	3;3;2;1	Pre-mRNA-splicing factor CWC25 homolog	CWC25	>sp|Q9NXE8|CWC25_HUMAN Pre-mRNA-splicing factor CWC25 homolog OS=Homo sapiens GN=CWC25 PE=1 SV=1;>tr|B4DJK2|B4DJK2_HUMAN Pre-mRNA-splicing factor CWC25 homolog OS=Homo sapiens GN=CWC25 PE=2 SV=1;>tr|B4DZL1|B4DZL1_HUMAN Pre-mRNA-splicing factor CWC25 homolo	4	3	3	3	5.2	5.2	5.2	49.647	425	425;362;157;78	NaN	NaN	NaN	NaN	NaN	NaN	NaN	NaN	NaN	NaN	NaN	NaN	NaN	NaN	NaN	NaN	NaN	NaN	NaN	NaN	NaN	NaN	NaN	NaN	NaN	NaN	NaN	NaN	NaN	NaN	NaN	NaN
Q96SY0;Q96SY0-4;Q96SY0-3;B4DVT3;B4DJL6;H3BRY6	Q96SY0;Q96SY0-4;Q96SY0-3;B4DVT3;B4DJL6;H3BRY6	7;7;7;7;7;6	7;7;7;7;7;6	7;7;7;7;7;6	von Willebrand factor A domain-containing protein 9	VWA9	>sp|Q96SY0|VWA9_HUMAN von Willebrand factor A domain-containing protein 9 OS=Homo sapiens GN=VWA9 PE=1 SV=2;>sp|Q96SY0-4|VWA9_HUMAN Isoform 4 of von Willebrand factor A domain-containing protein 9 OS=Homo sapiens GN=VWA9;>sp|Q96SY0-3|VWA9_HUMAN Isoform 3 o	6	7	7	7	23.7	23.7	23.7	57.47	518	518;439;461;482;554;468	NaN	NaN	NaN	NaN	NaN	NaN	NaN	NaN	NaN	NaN	NaN	1.2378	NaN	NaN	NaN	NaN	NaN	NaN	1.1636	1.3507	1.2252	1.1291	1.1229	1.0267	0.81641	0.79945	0.99676	0.90977	1.4569	1.3067	1.2381	0.89555
P62318;B4DJP7;H3BT13	P62318;B4DJP7;H3BT13	5;5;3	5;5;3	5;5;3	Small nuclear ribonucleoprotein Sm D3	SNRPD3	>sp|P62318|SMD3_HUMAN Small nuclear ribonucleoprotein Sm D3 OS=Homo sapiens GN=SNRPD3 PE=1 SV=1;>tr|B4DJP7|B4DJP7_HUMAN Small nuclear ribonucleoprotein Sm D3 OS=Homo sapiens GN=SNRPD3 PE=2 SV=1;>tr|H3BT13|H3BT13_HUMAN Small nuclear ribonucleoprotein Sm D3	3	5	5	5	53.2	53.2	53.2	13.916	126	126;120;62	0.90769	1.4684	1.7219	1.5727	1.7084	1.2959	1.4877	1.3298	1.3057	1.5257	1.2498	1.749	1.6495	1.8646	1.4665	1.4466	1.2723	1.2279	0.98934	1.8591	1.3543	1.6063	1.3262	1.698	1.2241	1.7026	1.946	1.72	1.4435	1.5712	1.814	2.165
O75390;B4DJV2;H0YIC4;H0YH82;F8VRI6;F8VPF9;F8VPA1;F8W1S4;F8VRP1;F8VX68;F8VR34;F8VTT8;F8W4S1;F8VVF6;F8W642;F8VZK9;F8VX07;F8VWQ5;F8VU34;F8W0J2	O75390;B4DJV2	20;20;9;6;5;5;5;5;4;4;4;4;4;3;2;2;2;2;2;1	20;20;9;6;5;5;5;5;4;4;4;4;4;3;2;2;2;2;2;1	19;19;9;6;5;5;5;5;4;4;3;3;3;2;2;2;2;1;1;0	Citrate synthase, mitochondrial;Citrate synthase	CS	>sp|O75390|CISY_HUMAN Citrate synthase, mitochondrial OS=Homo sapiens GN=CS PE=1 SV=2;>tr|B4DJV2|B4DJV2_HUMAN Citrate synthase OS=Homo sapiens GN=CS PE=2 SV=1	20	20	20	19	48.5	48.5	46.6	51.712	466	466;453;123;190;140;141;144;157;118;120;146;149;178;139;66;81;114;132;142;75	0.8745	0.93417	1.4181	1.1184	1.0794	1.0178	1.0703	0.78481	1.0797	1.0361	0.81734	0.8699	0.99637	0.95099	0.80271	0.98465	0.74647	1.067	1.0345	1.131	1.0998	1.1506	0.99326	1.027	0.88066	1.086	1.2128	1.1412	1.0308	1.0366	1.006	1.0108
Q9H115;Q4G0M0;B4DK44	Q9H115;Q4G0M0;B4DK44	5;5;5	2;2;2	2;2;2	Beta-soluble NSF attachment protein	NAPB	>sp|Q9H115|SNAB_HUMAN Beta-soluble NSF attachment protein OS=Homo sapiens GN=NAPB PE=1 SV=2;>tr|Q4G0M0|Q4G0M0_HUMAN Beta-soluble NSF attachment protein OS=Homo sapiens GN=NAPB PE=2 SV=1;>tr|B4DK44|B4DK44_HUMAN Beta-soluble NSF attachment protein OS=Homo sa	3	5	2	2	20.5	9.1	9.1	33.557	298	298;204;259	NaN	NaN	NaN	NaN	NaN	NaN	NaN	NaN	NaN	NaN	NaN	NaN	NaN	NaN	NaN	NaN	NaN	NaN	NaN	NaN	NaN	NaN	NaN	NaN	NaN	NaN	NaN	NaN	NaN	NaN	NaN	NaN
P30626;C9J0K6;B4DKK2;P30626-2;B4DHQ6	P30626;C9J0K6;B4DKK2;P30626-2;B4DHQ6	11;11;11;11;6	11;11;11;11;6	11;11;11;11;6	Sorcin	SRI	>sp|P30626|SORCN_HUMAN Sorcin OS=Homo sapiens GN=SRI PE=1 SV=1;>tr|C9J0K6|C9J0K6_HUMAN Sorcin OS=Homo sapiens GN=SRI PE=2 SV=1;>tr|B4DKK2|B4DKK2_HUMAN Sorcin OS=Homo sapiens GN=SRI PE=2 SV=1;>sp|P30626-2|SORCN_HUMAN Isoform 2 of Sorcin OS=Homo sapiens GN=S	5	11	11	11	55.1	55.1	55.1	21.676	198	198;155;180;183;158	0.96348	0.91802	0.9396	0.84344	0.92903	1.0642	1.0712	1.0595	0.93121	0.95769	1.0985	0.99875	1.0225	1.0765	1.0592	0.94899	0.93311	1.0781	0.93968	1.1658	1.2182	1.0235	1.1542	1.1026	0.89304	1.092	0.99521	1.1986	1.0729	1.1479	1.0789	1.1646
B4DKT0;Q9H8Y8;Q9H8Y8-2	B4DKT0;Q9H8Y8;Q9H8Y8-2	8;7;7	8;7;7	8;7;7	Golgi reassembly-stacking protein 2	GORASP2	>tr|B4DKT0|B4DKT0_HUMAN Golgi reassembly-stacking protein 2 OS=Homo sapiens GN=GORASP2 PE=2 SV=1;>sp|Q9H8Y8|GORS2_HUMAN Golgi reassembly-stacking protein 2 OS=Homo sapiens GN=GORASP2 PE=1 SV=3;>sp|Q9H8Y8-2|GORS2_HUMAN Isoform 2 of Golgi reassembly-stacking	3	8	8	8	22.6	22.6	22.6	48.674	464	464;452;384	NaN	1.1636	NaN	1.0218	NaN	NaN	0.9852	1.1451	1.353	1.1099	NaN	1.1524	NaN	1.3541	1.4205	NaN	1.3234	1.4905	0.89678	1.3765	1.1636	1.0973	1.2287	1.135	0.84645	1.2242	1.2041	1.2543	1.4136	1.125	1.2416	1.1883
P36542;B4DL14;P36542-2	P36542;B4DL14;P36542-2	9;9;9	9;9;9	9;9;9	ATP synthase subunit gamma, mitochondrial;ATP synthase subunit gamma	ATP5C1	>sp|P36542|ATPG_HUMAN ATP synthase subunit gamma, mitochondrial OS=Homo sapiens GN=ATP5C1 PE=1 SV=1;>tr|B4DL14|B4DL14_HUMAN ATP synthase subunit gamma OS=Homo sapiens GN=ATP5C1 PE=2 SV=1;>sp|P36542-2|ATPG_HUMAN Isoform Heart of ATP synthase subunit gamma,	3	9	9	9	30.2	30.2	30.2	32.996	298	298;250;297	0.94156	0.7148	1.1867	0.96891	1.0376	0.68234	0.95982	0.6227	0.89464	0.97729	0.77902	0.7482	0.8223	0.81102	0.7997	1.0105	0.7354	1.2214	0.81723	NaN	1.2119	1.3287	1.2308	1.113	1.0209	1.2943	1.0813	1.052	0.97027	1.3347	1.0646	0.9559
Q9NVU0;B4DL24;Q9NVU0-4;Q9NVU0-3;Q9NVU0-2;H3BNJ0	Q9NVU0;B4DL24;Q9NVU0-4;Q9NVU0-3;Q9NVU0-2	7;7;7;6;6;1	7;7;7;6;6;1	7;7;7;6;6;1	DNA-directed RNA polymerase III subunit RPC5	POLR3E	>sp|Q9NVU0|RPC5_HUMAN DNA-directed RNA polymerase III subunit RPC5 OS=Homo sapiens GN=POLR3E PE=1 SV=1;>tr|B4DL24|B4DL24_HUMAN DNA-directed RNA polymerase III subunit RPC5 OS=Homo sapiens GN=POLR3E PE=2 SV=1;>sp|Q9NVU0-4|RPC5_HUMAN Isoform 4 of DNA-directe	6	7	7	7	14	14	14	79.897	708	708;672;687;654;666;90	NaN	NaN	NaN	NaN	NaN	NaN	NaN	NaN	NaN	NaN	NaN	NaN	NaN	NaN	NaN	NaN	NaN	NaN	NaN	NaN	NaN	NaN	NaN	NaN	NaN	NaN	NaN	NaN	NaN	NaN	NaN	NaN
Q8N357;B4DLH2	Q8N357;B4DLH2	1;1	1;1	1;1	Solute carrier family 35 member F6	SLC35F6;C2orf18	>sp|Q8N357|S35F6_HUMAN Solute carrier family 35 member F6 OS=Homo sapiens GN=SLC35F6 PE=1 SV=1;>tr|B4DLH2|B4DLH2_HUMAN Chromosome 2 open reading frame 18, isoform CRA_c OS=Homo sapiens GN=SLC35F6 PE=2 SV=1	2	1	1	1	3.2	3.2	3.2	40.214	371	371;288	NaN	NaN	NaN	NaN	NaN	NaN	NaN	NaN	NaN	NaN	NaN	NaN	NaN	NaN	NaN	NaN	NaN	NaN	NaN	NaN	NaN	NaN	NaN	NaN	NaN	NaN	NaN	NaN	NaN	NaN	NaN	NaN
Q9H910;B4DLH4;A6NGP5;H3BU16;Q9H910-2;H3BMV3;H3BMT0;H3BTV5;H3BMM8;B4E1P3;H3BS08	Q9H910;B4DLH4;A6NGP5;H3BU16;Q9H910-2;H3BMV3;H3BMT0;H3BTV5	9;9;8;7;7;7;5;5;3;3;1	9;9;8;7;7;7;5;5;3;3;1	9;9;8;7;7;7;5;5;3;3;1	Hematological and neurological expressed 1-like protein	HN1L	>sp|Q9H910|HN1L_HUMAN Hematological and neurological expressed 1-like protein OS=Homo sapiens GN=HN1L PE=1 SV=1;>tr|B4DLH4|B4DLH4_HUMAN Hematological and neurological-expressed 1-like protein OS=Homo sapiens GN=HN1L PE=2 SV=1;>tr|A6NGP5|A6NGP5_HUMAN Hemato	11	9	9	9	65.3	65.3	65.3	20.063	190	190;218;178;167;174;190;115;116;70;98;77	0.83874	1.1357	1.199	0.99981	1.5268	1.3722	1.9097	1.3937	1.4251	2.0359	2.0814	1.7694	2.1115	2.4679	2.5999	2.2265	1.867	2.1299	0.98453	1.2537	1.5025	1.7263	1.7648	1.9084	0.97835	1.3749	1.8106	1.4036	1.6757	1.9408	1.8544	2.6889
B4DLN1;B4E1E9;I3L1E8	B4DLN1;B4E1E9	15;10;2	15;10;2	0;0;0		SLC25A10	>tr|B4DLN1|B4DLN1_HUMAN Mitochondrial dicarboxylate carrier OS=Homo sapiens GN=SLC25A10 PE=2 SV=1;>tr|B4E1E9|B4E1E9_HUMAN Mitochondrial dicarboxylate carrier OS=Homo sapiens GN=SLC25A10 PE=2 SV=1	3	15	15	0	42.3	42.3	0	48.099	442	442;244;113	1.1057	0.76695	1.3888	1.0172	1.0359	0.88896	1.1042	0.81962	1.0484	1.0482	0.87805	0.96315	1.08	0.96267	0.74841	1.0477	0.8013	1.3267	1.0544	1.394	1.2294	1.0427	1.1398	0.8602	0.85842	1.3264	1.4416	1.3106	1.1262	1.2999	1.0475	1.3045
P23443;P23443-2;Q7Z721;B4DLT4;F6UYM1;K7EIM2;K7ER06	P23443;P23443-2;Q7Z721;B4DLT4;F6UYM1	3;3;3;3;3;1;1	3;3;3;3;3;1;1	3;3;3;3;3;1;1	Ribosomal protein S6 kinase beta-1	RPS6KB1	>sp|P23443|KS6B1_HUMAN Ribosomal protein S6 kinase beta-1 OS=Homo sapiens GN=RPS6KB1 PE=1 SV=2;>sp|P23443-2|KS6B1_HUMAN Isoform Alpha II of Ribosomal protein S6 kinase beta-1 OS=Homo sapiens GN=RPS6KB1;>tr|Q7Z721|Q7Z721_HUMAN RPS6KB1 protein OS=Homo sapien	7	3	3	3	7.6	7.6	7.6	59.139	525	525;502;451;472;502;62;140	NaN	NaN	NaN	NaN	NaN	NaN	NaN	NaN	NaN	NaN	NaN	NaN	NaN	NaN	NaN	NaN	NaN	NaN	NaN	1.9568	NaN	NaN	1.6605	NaN	NaN	1.5379	1.625	2.0931	1.7411	NaN	1.6387	NaN
Q32NB8;B4DLU3;Q32NB8-2;K7EPX0	Q32NB8;B4DLU3;Q32NB8-2	4;4;3;1	4;4;3;1	2;2;1;1	CDP-diacylglycerol--glycerol-3-phosphate 3-phosphatidyltransferase, mitochondrial	PGS1	>sp|Q32NB8|PGPS1_HUMAN CDP-diacylglycerol--glycerol-3-phosphate 3-phosphatidyltransferase, mitochondrial OS=Homo sapiens GN=PGS1 PE=2 SV=1;>tr|B4DLU3|B4DLU3_HUMAN CDP-diacylglycerol--glycerol-3-phosphate 3-phosphatidyltransferase, mitochondrial OS=Homo sap	4	4	4	2	8.5	8.5	5.2	62.73	556	556;421;454;132	NaN	NaN	NaN	NaN	NaN	NaN	NaN	NaN	NaN	NaN	NaN	NaN	NaN	NaN	NaN	NaN	NaN	NaN	NaN	NaN	NaN	NaN	NaN	NaN	NaN	NaN	NaN	NaN	NaN	NaN	NaN	NaN
Q9Y296;B4DME1;E9PQE8;E9PN70;G3V1A0;G5EA23;E9PKS9;J3KP27	Q9Y296;B4DME1;E9PQE8;E9PN70;G3V1A0;G5EA23;E9PKS9;J3KP27	2;2;2;2;1;1;1;1	2;2;2;2;1;1;1;1	2;2;2;2;1;1;1;1	Trafficking protein particle complex subunit 4	TRAPPC4	>sp|Q9Y296|TPPC4_HUMAN Trafficking protein particle complex subunit 4 OS=Homo sapiens GN=TRAPPC4 PE=1 SV=1;>tr|B4DME1|B4DME1_HUMAN Trafficking protein particle complex subunit 4 OS=Homo sapiens GN=TRAPPC4 PE=2 SV=1;>tr|E9PQE8|E9PQE8_HUMAN Trafficking prote	8	2	2	2	11.4	11.4	11.4	24.34	219	219;165;176;257;117;126;126;181	NaN	NaN	NaN	NaN	NaN	NaN	NaN	NaN	NaN	NaN	NaN	NaN	NaN	NaN	NaN	NaN	NaN	NaN	NaN	NaN	NaN	NaN	NaN	NaN	NaN	NaN	NaN	NaN	NaN	NaN	NaN	NaN
P32322;B4DMU0;E2QRB3;P32322-2;J3KQ22;J3QL24;J3QKT4;J3QLK9;J3QL23;J3QL32;J3QR88;J3KTA8;J3QKT3;J3QRZ0;J3KSA9	P32322;B4DMU0;E2QRB3;P32322-2;J3KQ22	16;16;15;14;9;7;7;6;6;6;4;3;3;3;2	16;16;15;14;9;7;7;6;6;6;4;3;3;3;2	15;15;14;13;9;7;6;6;6;6;4;3;3;3;2	Pyrroline-5-carboxylate reductase 1, mitochondrial;Pyrroline-5-carboxylate reductase	PYCR1	>sp|P32322|P5CR1_HUMAN Pyrroline-5-carboxylate reductase 1, mitochondrial OS=Homo sapiens GN=PYCR1 PE=1 SV=2;>tr|B4DMU0|B4DMU0_HUMAN Pyrroline-5-carboxylate reductase OS=Homo sapiens GN=PYCR1 PE=2 SV=1;>tr|E2QRB3|E2QRB3_HUMAN Pyrroline-5-carboxylate reduct	15	16	16	15	52	52	48	33.36	319	319;346;288;316;253;225;242;165;173;217;132;84;94;115;109	0.90458	0.84026	1.3894	1.1613	1.0669	0.94786	1.0125	0.78038	1.0451	1.0723	0.94153	0.92778	1.239	1.0338	0.84405	1.0467	0.83204	1.2159	0.98331	1.1616	1.1254	1.1603	1.1803	1.0964	0.99268	1.1762	1.156	1.1708	1.0702	1.0922	1.0277	1.1359
Q2TAA2;B4DMV3;H7C5G1;C9JDY4;C9J5J2;C9JE02	Q2TAA2;B4DMV3;H7C5G1;C9JDY4;C9J5J2;C9JE02	2;2;2;1;1;1	2;2;2;1;1;1	2;2;2;1;1;1	Isoamyl acetate-hydrolyzing esterase 1 homolog	IAH1	>sp|Q2TAA2|IAH1_HUMAN Isoamyl acetate-hydrolyzing esterase 1 homolog OS=Homo sapiens GN=IAH1 PE=1 SV=1;>tr|B4DMV3|B4DMV3_HUMAN HCG1685787, isoform CRA_b OS=Homo sapiens GN=IAH1 PE=2 SV=1;>tr|H7C5G1|H7C5G1_HUMAN Isoamyl acetate-hydrolyzing esterase 1 homolo	6	2	2	2	15.7	15.7	15.7	27.598	248	248;135;228;47;74;160	NaN	NaN	NaN	NaN	NaN	NaN	NaN	NaN	NaN	NaN	NaN	NaN	NaN	NaN	NaN	NaN	NaN	NaN	NaN	NaN	NaN	NaN	NaN	NaN	NaN	NaN	NaN	NaN	NaN	NaN	NaN	NaN
Q96GC5;F5H702;B4DN34;F5H8D0	Q96GC5;F5H702;B4DN34	4;4;4;1	4;4;4;1	4;4;4;1	39S ribosomal protein L48, mitochondrial	MRPL48	>sp|Q96GC5|RM48_HUMAN 39S ribosomal protein L48, mitochondrial OS=Homo sapiens GN=MRPL48 PE=1 SV=2;>tr|F5H702|F5H702_HUMAN 39S ribosomal protein L48, mitochondrial OS=Homo sapiens GN=MRPL48 PE=4 SV=1;>tr|B4DN34|B4DN34_HUMAN 39S ribosomal protein L48, mitoc	4	4	4	4	21.7	21.7	21.7	23.934	212	212;113;194;121	0.94185	NaN	NaN	NaN	NaN	NaN	NaN	0.83706	NaN	NaN	NaN	NaN	NaN	NaN	NaN	0.98137	NaN	NaN	NaN	0.92546	NaN	NaN	NaN	NaN	NaN	NaN	1.0542	0.97095	NaN	NaN	NaN	NaN
P29558;E7ETU5;P29558-2;B4DN88	P29558;E7ETU5;P29558-2;B4DN88	3;3;3;3	2;2;2;2	1;1;1;1	RNA-binding motif, single-stranded-interacting protein 1	RBMS1	>sp|P29558|RBMS1_HUMAN RNA-binding motif, single-stranded-interacting protein 1 OS=Homo sapiens GN=RBMS1 PE=1 SV=3;>tr|E7ETU5|E7ETU5_HUMAN RNA-binding motif, single-stranded-interacting protein 1 OS=Homo sapiens GN=RBMS1 PE=4 SV=1;>sp|P29558-2|RBMS1_HUMAN	4	3	2	1	9.1	7.4	3.7	44.505	406	406;370;403;419	NaN	NaN	NaN	NaN	NaN	NaN	NaN	NaN	NaN	NaN	NaN	NaN	NaN	NaN	NaN	NaN	NaN	NaN	NaN	NaN	NaN	NaN	NaN	NaN	NaN	NaN	NaN	NaN	NaN	NaN	NaN	NaN
Q01130;J3QL05;J3KP15;B4DN89	Q01130;J3QL05;J3KP15;B4DN89	7;7;7;7	7;7;7;7	5;5;5;5	Serine/arginine-rich splicing factor 2	SRSF2;SFRS2	>sp|Q01130|SRSF2_HUMAN Serine/arginine-rich splicing factor 2 OS=Homo sapiens GN=SRSF2 PE=1 SV=4;>tr|J3QL05|J3QL05_HUMAN Serine/arginine-rich-splicing factor 2 (Fragment) OS=Homo sapiens GN=SRSF2 PE=4 SV=1;>tr|J3KP15|J3KP15_HUMAN Serine/arginine-rich-splic	4	7	7	5	25.3	25.3	21.7	25.476	221	221;130;134;209	0.95631	0.98757	1.0578	0.9667	1.0606	1.0999	1.0258	0.94308	1.0795	1.0101	1.0012	1.0141	1.1172	1.1223	1.0891	1.0493	0.96781	1.0388	1.0827	0.92904	0.84387	0.98994	1.3512	0.83665	1.2089	0.79683	0.96013	0.87004	0.82265	1.0933	0.95376	0.96206
Q8N1B4;B4DNI9;B4DS44;B0UYQ4	Q8N1B4;B4DNI9;B4DS44	6;6;6;1	6;6;6;1	6;6;6;1	Vacuolar protein sorting-associated protein 52 homolog	VPS52	>sp|Q8N1B4|VPS52_HUMAN Vacuolar protein sorting-associated protein 52 homolog OS=Homo sapiens GN=VPS52 PE=1 SV=1;>tr|B4DNI9|B4DNI9_HUMAN Vacuolar protein sorting-associated protein 52 homolog OS=Homo sapiens GN=VPS52 PE=2 SV=1;>tr|B4DS44|B4DS44_HUMAN Vacuo	4	6	6	6	9.3	9.3	9.3	82.22	723	723;598;701;125	NaN	NaN	NaN	NaN	NaN	NaN	NaN	NaN	NaN	NaN	NaN	NaN	NaN	NaN	NaN	NaN	NaN	NaN	NaN	NaN	NaN	NaN	NaN	NaN	NaN	NaN	NaN	NaN	NaN	NaN	NaN	NaN
Q9Y3F4;B4DNJ6;B0AZV0;H0YH33	Q9Y3F4;B4DNJ6;B0AZV0	19;19;15;6	19;19;15;6	19;19;15;6	Serine-threonine kinase receptor-associated protein	STRAP	>sp|Q9Y3F4|STRAP_HUMAN Serine-threonine kinase receptor-associated protein OS=Homo sapiens GN=STRAP PE=1 SV=1;>tr|B4DNJ6|B4DNJ6_HUMAN Serine-threonine kinase receptor-associated protein OS=Homo sapiens GN=STRAP PE=2 SV=1;>tr|B0AZV0|B0AZV0_HUMAN Serine-thre	4	19	19	19	62.3	62.3	62.3	38.438	350	350;363;256;95	0.89334	1.0368	1.0179	1.0563	1.0887	1.1064	1.0493	1.0278	1.0488	1.0392	0.99148	1.0229	1.0718	1.0426	1.1905	1.0199	1.0048	1.0008	1.0222	1.282	1.2022	1.1758	1.2011	1.1623	0.87614	1.1924	1.1628	1.147	1.2201	1.1676	1.2148	1.1667
Q03154;B4DNW0;C9J6I6;C9J9D8;C9JMV9;C9JWD4;C9JYZ0;F8WC59	Q03154;B4DNW0;C9J6I6;C9J9D8;C9JMV9;C9JWD4	14;14;13;12;12;11;5;4	14;14;13;12;12;11;5;4	14;14;13;12;12;11;5;4	Aminoacylase-1	ACY1;ABHD14A-ACY1	>sp|Q03154|ACY1_HUMAN Aminoacylase-1 OS=Homo sapiens GN=ACY1 PE=1 SV=1;>tr|B4DNW0|B4DNW0_HUMAN Aminoacylase-1 OS=Homo sapiens GN=ACY1 PE=2 SV=1;>tr|C9J6I6|C9J6I6_HUMAN Aminoacylase-1 OS=Homo sapiens GN=ACY1 PE=2 SV=1;>tr|C9J9D8|C9J9D8_HUMAN Aminoacylase-1	8	14	14	14	51.5	51.5	51.5	45.884	408	408;498;373;336;509;343;228;201	1.2546	1.1199	1.0277	1.2507	1.1274	1.4107	0.92837	1.0788	1.2528	1.1928	1.1362	1.0291	1.1723	1.3037	0.98668	0.96841	1.2342	NaN	0.6219	0.73745	0.92303	0.61666	1.2572	0.81109	0.99973	1.3303	NaN	0.74188	0.77861	1.1646	1.3349	1.0563
Q13889;F5GWD3;B4DNZ6;F5H6X0;H0YFF7;F5GX35;F5H4K7	Q13889;F5GWD3;B4DNZ6;F5H6X0;H0YFF7;F5GX35;F5H4K7	3;3;3;2;2;2;2	3;3;3;2;2;2;2	1;1;1;0;1;0;0	General transcription factor IIH subunit 3	GTF2H3	>sp|Q13889|TF2H3_HUMAN General transcription factor IIH subunit 3 OS=Homo sapiens GN=GTF2H3 PE=1 SV=2;>tr|F5GWD3|F5GWD3_HUMAN General transcription factor IIH subunit 3 (Fragment) OS=Homo sapiens GN=GTF2H3 PE=2 SV=1;>tr|B4DNZ6|B4DNZ6_HUMAN General transcri	7	3	3	1	13	13	4.5	34.378	308	308;258;267;148;194;200;210	NaN	NaN	NaN	NaN	NaN	NaN	NaN	NaN	NaN	NaN	NaN	NaN	NaN	NaN	NaN	NaN	NaN	NaN	NaN	NaN	NaN	NaN	NaN	NaN	NaN	NaN	NaN	NaN	NaN	NaN	NaN	NaN
Q15185;B4DP11;B4DP21;B4DDC6;B4DHP2	Q15185;B4DP11;B4DP21;B4DDC6	11;11;9;6;5	11;11;9;6;5	11;11;9;6;5	Prostaglandin E synthase 3	PTGES3	>sp|Q15185|TEBP_HUMAN Prostaglandin E synthase 3 OS=Homo sapiens GN=PTGES3 PE=1 SV=1;>tr|B4DP11|B4DP11_HUMAN Prostaglandin E synthase 3 OS=Homo sapiens GN=PTGES3 PE=2 SV=1;>tr|B4DP21|B4DP21_HUMAN Prostaglandin E synthase 3 OS=Homo sapiens GN=PTGES3 PE=2 SV	5	11	11	11	60.6	60.6	60.6	18.697	160	160;139;130;124;127	0.8709	0.99064	1.0367	0.99507	1.1213	1.0843	1.0518	1.068	1.1755	0.96845	1.076	0.99747	1.0455	1.0716	1.2065	1.0221	1.0534	1.1511	1.0351	1.2773	1.2684	1.0013	1.1699	1.0086	0.9576	1.2646	1.3039	1.225	1.2505	1.2138	1.2215	1.097
Q13137;E9PBE5;B4DP36;D6REB0;E7ENK0;Q13137-2;D6RJE7;D6RF70;I3L4E1;I3L493;D6RBI4	Q13137;E9PBE5;B4DP36;D6REB0;E7ENK0;Q13137-2;D6RJE7;D6RF70	6;6;6;5;5;4;3;3;1;1;1	6;6;6;5;5;4;3;3;1;1;1	5;5;5;4;4;3;3;3;1;1;1	Calcium-binding and coiled-coil domain-containing protein 2	CALCOCO2	>sp|Q13137|CACO2_HUMAN Calcium-binding and coiled-coil domain-containing protein 2 OS=Homo sapiens GN=CALCOCO2 PE=1 SV=1;>tr|E9PBE5|E9PBE5_HUMAN Calcium-binding and coiled-coil domain-containing protein 2 OS=Homo sapiens GN=CALCOCO2 PE=4 SV=1;>tr|B4DP36|B4	11	6	6	5	15.2	15.2	12.1	52.253	446	446;467;470;259;374;404;168;193;108;121;154	NaN	NaN	NaN	NaN	NaN	NaN	NaN	NaN	NaN	NaN	NaN	NaN	NaN	NaN	NaN	NaN	NaN	NaN	NaN	NaN	NaN	NaN	NaN	NaN	NaN	NaN	NaN	NaN	NaN	NaN	NaN	NaN
Q9H000;B4DPR4;C9J494	Q9H000;B4DPR4;C9J494	6;6;6	6;6;6	6;6;6	Probable E3 ubiquitin-protein ligase makorin-2	MKRN2	>sp|Q9H000|MKRN2_HUMAN Probable E3 ubiquitin-protein ligase makorin-2 OS=Homo sapiens GN=MKRN2 PE=2 SV=2;>tr|B4DPR4|B4DPR4_HUMAN Makorin, ring finger protein, 2, isoform CRA_b OS=Homo sapiens GN=MKRN2 PE=2 SV=1;>tr|C9J494|C9J494_HUMAN Probable E3 ubiquitin	3	6	6	6	16.6	16.6	16.6	46.94	416	416;373;414	NaN	NaN	NaN	NaN	NaN	NaN	NaN	NaN	NaN	NaN	NaN	NaN	NaN	NaN	NaN	NaN	NaN	NaN	1.1262	NaN	NaN	NaN	2.1502	1.5639	1.1637	NaN	NaN	NaN	NaN	NaN	NaN	NaN
O94842;B4DPY8;O15405;O15405-2;O94900;Q96NM4;B4DQV8;Q96NM4-3;Q96NM4-2	O94842;B4DPY8	10;10;2;2;1;1;1;1;1	10;10;2;2;1;1;1;1;1	9;9;1;1;1;0;0;0;0	TOX high mobility group box family member 4	TOX4	>sp|O94842|TOX4_HUMAN TOX high mobility group box family member 4 OS=Homo sapiens GN=TOX4 PE=1 SV=1;>tr|B4DPY8|B4DPY8_HUMAN TOX high mobility group box family member 4 OS=Homo sapiens GN=TOX4 PE=2 SV=1	9	10	10	9	21.9	21.9	19.6	66.194	621	621;598;576;571;526;488;384;465;515	0.9493	0.90416	NaN	0.93306	NaN	1.2954	NaN	1.0691	NaN	NaN	1.1218	0.96937	0.85526	1.1001	1.0052	NaN	1.0556	NaN	1.0363	1.0666	1.1071	1.0308	1.1149	1.2082	NaN	0.94299	1.0638	0.9139	NaN	1.0143	0.93831	1.1238
B4DQH9;Q6VN20;B4DID0;B4DHL9;B3KP49	B4DQH9;Q6VN20;B4DID0	6;5;3;2;2	4;3;3;2;2	4;3;3;2;2	Ran-binding protein 10	RANBP10	>tr|B4DQH9|B4DQH9_HUMAN Ran-binding protein 10 OS=Homo sapiens GN=RANBP10 PE=2 SV=1;>sp|Q6VN20|RBP10_HUMAN Ran-binding protein 10 OS=Homo sapiens GN=RANBP10 PE=1 SV=1;>tr|B4DID0|B4DID0_HUMAN Ran-binding protein 10 OS=Homo sapiens GN=RANBP10 PE=2 SV=1	5	6	4	4	16.7	10.6	10.6	64.541	594	594;620;533;179;391	NaN	NaN	NaN	NaN	NaN	NaN	NaN	NaN	NaN	NaN	NaN	NaN	NaN	NaN	NaN	NaN	NaN	NaN	NaN	NaN	NaN	NaN	NaN	NaN	NaN	NaN	NaN	NaN	NaN	NaN	NaN	NaN
P52209;B4DQJ8;F5H7U0;K7EM49;K7EMN2;K7EPF6;K7ELN9	P52209;B4DQJ8;F5H7U0;K7EM49	26;26;23;13;11;10;6	26;26;23;13;11;10;6	26;26;23;13;11;10;6	6-phosphogluconate dehydrogenase, decarboxylating	PGD	>sp|P52209|6PGD_HUMAN 6-phosphogluconate dehydrogenase, decarboxylating OS=Homo sapiens GN=PGD PE=1 SV=3;>tr|B4DQJ8|B4DQJ8_HUMAN 6-phosphogluconate dehydrogenase, decarboxylating OS=Homo sapiens GN=PGD PE=2 SV=1;>tr|F5H7U0|F5H7U0_HUMAN 6-phosphogluconate d	7	26	26	26	55.3	55.3	55.3	53.139	483	483;470;461;205;160;256;224	1.0316	1.1293	1.135	1.0961	1.0952	1.0984	1.1006	1.1046	1.2718	1.1078	1.2163	1.1676	1.0676	1.1728	1.1911	1.1261	1.0421	1.1186	0.94229	1.3195	1.1783	1.0955	1.1934	1.2577	0.98885	1.2754	1.1669	1.2183	1.1852	1.1397	1.2397	1.2714
Q7L5Y9;B4DQT1;B4DVN3;E7ESC7;Q7L5Y9-3;Q7L5Y9-2;E7ENL1;Q7L5Y9-4;D6RIB6;D6RE80;D6REW7;D6RID6;Q7L5Y9-5;D6RDW4	Q7L5Y9;B4DQT1;B4DVN3;E7ESC7;Q7L5Y9-3;Q7L5Y9-2;E7ENL1;Q7L5Y9-4;D6RIB6	8;8;8;8;7;6;6;4;4;3;3;2;2;2	8;8;8;8;7;6;6;4;4;3;3;2;2;2	8;8;8;8;7;6;6;4;4;3;3;2;2;2	Macrophage erythroblast attacher	MAEA	>sp|Q7L5Y9|MAEA_HUMAN Macrophage erythroblast attacher OS=Homo sapiens GN=MAEA PE=1 SV=1;>tr|B4DQT1|B4DQT1_HUMAN Macrophage erythroblast attacher OS=Homo sapiens GN=MAEA PE=2 SV=1;>tr|B4DVN3|B4DVN3_HUMAN Macrophage erythroblast attacher OS=Homo sapiens GN=	14	8	8	8	22.2	22.2	22.2	45.287	396	396;348;395;434;355;360;317;328;328;183;274;115;245;245	NaN	NaN	1.194	NaN	NaN	NaN	NaN	1.2657	NaN	NaN	NaN	NaN	NaN	NaN	1.3558	NaN	1.1774	NaN	NaN	NaN	NaN	NaN	NaN	NaN	NaN	NaN	NaN	NaN	NaN	NaN	NaN	NaN
Q86UY6;F5H2C9;B4DR03	Q86UY6;F5H2C9;B4DR03	1;1;1	1;1;1	1;1;1	N-alpha-acetyltransferase 40	NAA40	>sp|Q86UY6|NAA40_HUMAN N-alpha-acetyltransferase 40 OS=Homo sapiens GN=NAA40 PE=2 SV=1;>tr|F5H2C9|F5H2C9_HUMAN N-alpha-acetyltransferase 40 OS=Homo sapiens GN=NAA40 PE=2 SV=1;>tr|B4DR03|B4DR03_HUMAN N-alpha-acetyltransferase 40 OS=Homo sapiens GN=NAA40 PE=	3	1	1	1	5.1	5.1	5.1	27.194	237	237;124;216	NaN	NaN	NaN	NaN	NaN	NaN	NaN	NaN	NaN	NaN	NaN	NaN	NaN	NaN	NaN	NaN	NaN	NaN	NaN	NaN	NaN	NaN	NaN	NaN	NaN	NaN	NaN	NaN	NaN	NaN	NaN	NaN
Q99880;Q99877;Q93079;P58876;O60814;Q99879;Q5QNW6;P62807;P57053;Q5QNW6-2;B4DR52	Q99880;Q99877;Q93079;P58876;O60814;Q99879;Q5QNW6;P62807;P57053;Q5QNW6-2;B4DR52	7;7;7;7;7;7;7;7;7;7;7	2;2;2;2;2;2;2;2;2;2;2	2;2;2;2;2;2;2;2;2;2;2	Histone H2B type 1-L;Histone H2B type 1-N;Histone H2B type 1-H;Histone H2B type 1-D;Histone H2B type 1-K;Histone H2B type 1-M;Histone H2B type 2-F;Histone H2B type 1-C/E/F/G/I;Histone H2B type F-S;Histone H2B	HIST1H2BL;HIST1H2BN;HIST1H2BH;HIST1H2BD;HIST1H2BK;HIST1H2BM;HIST2H2BF;HIST1H2BC;H2BFS	>sp|Q99880|H2B1L_HUMAN Histone H2B type 1-L OS=Homo sapiens GN=HIST1H2BL PE=1 SV=3;>sp|Q99877|H2B1N_HUMAN Histone H2B type 1-N OS=Homo sapiens GN=HIST1H2BN PE=1 SV=3;>sp|Q93079|H2B1H_HUMAN Histone H2B type 1-H OS=Homo sapiens GN=HIST1H2BH PE=1 SV=3;>sp|P58	11	7	2	2	46.8	7.9	7.9	13.952	126	126;126;126;126;126;126;126;126;126;134;166	0.96807	0.83745	1.1311	0.87242	0.82396	1.4471	0.85	1.0103	0.97748	0.77449	1.0721	0.90125	0.88957	0.70439	1.2015	0.9135	1.0416	1.143	0.83227	0.65916	0.72044	0.66477	0.64918	0.72637	0.60646	0.92469	0.94196	0.79909	0.68265	0.73768	0.70577	0.64424
P61619;B4DR61;P61619-3;Q9H9S3;F8W773;H7C1Q9;C9JXC6;H7C069;A6NK38;F2Z2C7;A6NIF9;C9JJV4;F8W776;Q8TC24;Q9H9S3-2	P61619;B4DR61;P61619-3	7;7;5;2;2;2;2;2;2;2;2;2;2;2;2	7;7;5;2;2;2;2;2;2;2;2;2;2;2;2	7;7;5;2;2;2;2;2;2;2;2;2;2;2;2	Protein transport protein Sec61 subunit alpha isoform 1	SEC61A1	>sp|P61619|S61A1_HUMAN Protein transport protein Sec61 subunit alpha isoform 1 OS=Homo sapiens GN=SEC61A1 PE=1 SV=2;>tr|B4DR61|B4DR61_HUMAN Protein transport protein Sec61 subunit alpha isoform 1 OS=Homo sapiens GN=SEC61A1 PE=2 SV=1;>sp|P61619-3|S61A1_HUMA	15	7	7	7	11.8	11.8	11.8	52.264	476	476;482;356;476;454;94;101;145;159;162;168;189;410;418;437	NaN	0.75724	0.83203	0.90097	0.82561	0.72566	0.76391	1.0284	0.92741	0.75091	NaN	0.80437	NaN	NaN	NaN	1.02	NaN	NaN	0.8593	0.96996	0.94849	0.95877	1.116	0.90763	0.78544	1.0252	NaN	0.96374	0.83818	0.76012	0.67877	0.92211
Q9Y673;B4DR67;Q9Y673-2	Q9Y673;B4DR67;Q9Y673-2	4;4;4	4;4;4	4;4;4	Dolichyl-phosphate beta-glucosyltransferase	ALG5	>sp|Q9Y673|ALG5_HUMAN Dolichyl-phosphate beta-glucosyltransferase OS=Homo sapiens GN=ALG5 PE=1 SV=1;>tr|B4DR67|B4DR67_HUMAN Dolichyl-phosphate beta-glucosyltransferase OS=Homo sapiens GN=ALG5 PE=2 SV=1;>sp|Q9Y673-2|ALG5_HUMAN Isoform 2 of Dolichyl-phosphat	3	4	4	4	17.6	17.6	17.6	36.946	324	324;230;294	NaN	NaN	NaN	NaN	NaN	NaN	NaN	NaN	NaN	NaN	NaN	NaN	NaN	NaN	NaN	NaN	NaN	NaN	NaN	NaN	NaN	NaN	NaN	NaN	NaN	NaN	NaN	NaN	NaN	NaN	NaN	NaN
Q9Y6E0;Q9Y6E0-2;B4DR80;H0Y630;Q5JV98;Q5JV99	Q9Y6E0;Q9Y6E0-2;B4DR80;H0Y630;Q5JV98	13;13;13;12;7;5	6;6;6;6;4;3	4;4;4;4;3;3	Serine/threonine-protein kinase 24;Serine/threonine-protein kinase 24 36 kDa subunit;Serine/threonine-protein kinase 24 12 kDa subunit	STK24	>sp|Q9Y6E0|STK24_HUMAN Serine/threonine-protein kinase 24 OS=Homo sapiens GN=STK24 PE=1 SV=1;>sp|Q9Y6E0-2|STK24_HUMAN Isoform A of Serine/threonine-protein kinase 24 OS=Homo sapiens GN=STK24;>tr|B4DR80|B4DR80_HUMAN Serine/threonine-protein kinase 24 12 kDa	6	13	6	4	32.5	19.4	13.5	49.307	443	443;431;412;369;209;142	NaN	NaN	NaN	NaN	NaN	NaN	NaN	NaN	NaN	NaN	NaN	NaN	NaN	NaN	NaN	NaN	NaN	NaN	NaN	NaN	1.0444	NaN	NaN	NaN	NaN	NaN	NaN	NaN	NaN	1.4757	NaN	NaN
Q02809;B4DR87;Q5JXB7;Q5JXB9;Q5JXB8	Q02809;B4DR87	36;36;10;9;7	36;36;10;9;7	36;36;10;9;7	Procollagen-lysine,2-oxoglutarate 5-dioxygenase 1	PLOD1	>sp|Q02809|PLOD1_HUMAN Procollagen-lysine,2-oxoglutarate 5-dioxygenase 1 OS=Homo sapiens GN=PLOD1 PE=1 SV=2;>tr|B4DR87|B4DR87_HUMAN Procollagen-lysine,2-oxoglutarate 5-dioxygenase 1 OS=Homo sapiens GN=PLOD1 PE=2 SV=1	5	36	36	36	56.4	56.4	56.4	83.549	727	727;774;283;199;225	0.89218	1.0309	1.1461	1.0313	1.0318	1.0283	1.0522	1.066	1.0569	1.093	1.0016	1.1246	1.0758	1.0822	1.1952	0.98268	1.0522	1.0585	0.98265	1.1656	1.1387	0.99341	1.1295	1.1078	0.85577	1.0876	1.0948	1.2175	1.0952	1.0342	1.0637	1.0902
Q9NUQ6;Q9NUQ6-2;B4DRE6;B4DT67;B8ZZZ7;C9JW67;F8W6C2;C9JKE4;F8VZ02;F8VT91;C9JGM8;C9IZC3;C9J8M7;H7C2G5;F2Z2S1	Q9NUQ6;Q9NUQ6-2;B4DRE6;B4DT67;B8ZZZ7;C9JW67;F8W6C2	7;7;7;7;6;4;4;2;2;2;2;1;1;1;1	7;7;7;7;6;4;4;2;2;2;2;1;1;1;1	7;7;7;7;6;4;4;2;2;2;2;1;1;1;1	SPATS2-like protein	SPATS2L	>sp|Q9NUQ6|SPS2L_HUMAN SPATS2-like protein OS=Homo sapiens GN=SPATS2L PE=1 SV=2;>sp|Q9NUQ6-2|SPS2L_HUMAN Isoform 2 of SPATS2-like protein OS=Homo sapiens GN=SPATS2L;>tr|B4DRE6|B4DRE6_HUMAN SPATS2-like protein OS=Homo sapiens GN=SPATS2L PE=2 SV=1;>tr|B4DT67	15	7	7	7	15.9	15.9	15.9	61.728	558	558;489;566;588;498;238;266;154;173;188;193;94;115;117;140	NaN	NaN	NaN	NaN	NaN	NaN	NaN	NaN	NaN	NaN	NaN	NaN	NaN	NaN	NaN	NaN	NaN	NaN	NaN	NaN	NaN	NaN	NaN	NaN	NaN	NaN	NaN	NaN	NaN	NaN	NaN	NaN
P18846;B4DRF9	P18846;B4DRF9	3;3	3;3	1;1	Cyclic AMP-dependent transcription factor ATF-1	ATF1	>sp|P18846|ATF1_HUMAN Cyclic AMP-dependent transcription factor ATF-1 OS=Homo sapiens GN=ATF1 PE=1 SV=2;>tr|B4DRF9|B4DRF9_HUMAN Cyclic AMP-dependent transcription factor ATF-1 OS=Homo sapiens GN=ATF1 PE=2 SV=1	2	3	3	1	15.5	15.5	9.6	29.232	271	271;136	0.85887	NaN	NaN	NaN	NaN	NaN	NaN	NaN	NaN	NaN	NaN	NaN	NaN	NaN	NaN	NaN	NaN	NaN	NaN	1.1464	NaN	NaN	NaN	NaN	NaN	0.95307	1.0264	1.1144	1.0476	NaN	NaN	NaN
Q96JJ3;Q5JVZ5;B4DRL5;F5GZP8;Q7Z5G9;B4DZ20;Q5JW01;H0YCM7;Q5JVZ4;Q5JVZ8;Q92556;Q92556-2;Q92556-3	Q96JJ3;Q5JVZ5;B4DRL5;F5GZP8;Q7Z5G9;B4DZ20;Q5JW01;H0YCM7	10;10;10;8;8;7;6;6;3;2;1;1;1	10;10;10;8;8;7;6;6;3;2;1;1;1	10;10;10;8;8;7;6;6;3;2;1;1;1	Engulfment and cell motility protein 2	ELMO2	>sp|Q96JJ3|ELMO2_HUMAN Engulfment and cell motility protein 2 OS=Homo sapiens GN=ELMO2 PE=1 SV=2;>tr|Q5JVZ5|Q5JVZ5_HUMAN Engulfment and cell motility protein 2 OS=Homo sapiens GN=ELMO2 PE=4 SV=1;>tr|B4DRL5|B4DRL5_HUMAN Engulfment and cell motility protein	13	10	10	10	20.4	20.4	20.4	82.614	720	720;718;732;537;632;452;283;441;338;267;727;247;429	NaN	NaN	NaN	NaN	NaN	NaN	NaN	NaN	NaN	NaN	NaN	NaN	NaN	NaN	NaN	NaN	NaN	NaN	NaN	NaN	NaN	NaN	NaN	NaN	NaN	NaN	NaN	NaN	NaN	NaN	NaN	NaN
P24386;B4DRL9	P24386;B4DRL9	7;7	7;7	7;7	Rab proteins geranylgeranyltransferase component A 1	CHM	>sp|P24386|RAE1_HUMAN Rab proteins geranylgeranyltransferase component A 1 OS=Homo sapiens GN=CHM PE=1 SV=3;>tr|B4DRL9|B4DRL9_HUMAN Rab proteins geranylgeranyltransferase component A 1 OS=Homo sapiens GN=CHM PE=2 SV=1	2	7	7	7	15.9	15.9	15.9	73.475	653	653;505	NaN	NaN	NaN	NaN	NaN	NaN	NaN	NaN	NaN	NaN	NaN	NaN	NaN	NaN	NaN	NaN	NaN	NaN	NaN	NaN	NaN	NaN	NaN	NaN	NaN	NaN	NaN	NaN	NaN	NaN	NaN	NaN
Q92552;B4DRT2;G5EA06;D6RH20;D6RJC7;E5RJ73	Q92552;B4DRT2;G5EA06;D6RH20	17;17;16;15;8;4	17;17;16;15;8;4	17;17;16;15;8;4	28S ribosomal protein S27, mitochondrial	MRPS27	>sp|Q92552|RT27_HUMAN 28S ribosomal protein S27, mitochondrial OS=Homo sapiens GN=MRPS27 PE=1 SV=3;>tr|B4DRT2|B4DRT2_HUMAN 28S ribosomal protein S27, mitochondrial OS=Homo sapiens GN=MRPS27 PE=2 SV=1;>tr|G5EA06|G5EA06_HUMAN 28S ribosomal protein S27, mitoc	6	17	17	17	47.8	47.8	47.8	47.611	414	414;428;358;299;197;94	0.82514	0.90657	1.2332	1.0343	0.94601	1.0879	1.043	0.85931	1.1359	0.98692	0.96501	1.0124	0.95293	0.87383	0.8034	0.91882	0.80837	1.3672	0.94358	1.3191	1.3738	1.1014	1.3522	1.1778	0.92977	1.2857	1.3531	1.175	1.0548	1.2165	1.0061	1.1944
Q96JG6;B4DS55;Q96JG6-3;Q75N11;H0Y7Q2;Q5JPD9	Q96JG6;B4DS55;Q96JG6-3;Q75N11;H0Y7Q2;Q5JPD9	3;3;3;2;2;2	3;3;3;2;2;2	3;3;3;2;2;2	Coiled-coil domain-containing protein 132	CCDC132;FLJ20097;DKFZp313I2429	>sp|Q96JG6|CC132_HUMAN Coiled-coil domain-containing protein 132 OS=Homo sapiens GN=CCDC132 PE=1 SV=3;>tr|B4DS55|B4DS55_HUMAN Coiled-coil domain-containing protein 132 OS=Homo sapiens GN=CCDC132 PE=2 SV=1;>sp|Q96JG6-3|CC132_HUMAN Isoform 3 of Coiled-coil d	6	3	3	3	4.4	4.4	4.4	111.17	964	964;684;934;413;469;593	NaN	NaN	NaN	NaN	NaN	NaN	NaN	NaN	NaN	NaN	NaN	NaN	NaN	NaN	NaN	NaN	NaN	NaN	NaN	NaN	NaN	NaN	NaN	NaN	NaN	NaN	NaN	NaN	NaN	NaN	NaN	NaN
Q8N4J0;Q5T8U9;B4DSD4;Q5T8V1	Q8N4J0;Q5T8U9;B4DSD4;Q5T8V1	1;1;1;1	1;1;1;1	1;1;1;1	UPF0586 protein C9orf41	C9orf41	>sp|Q8N4J0|CI041_HUMAN UPF0586 protein C9orf41 OS=Homo sapiens GN=C9orf41 PE=1 SV=1;>tr|Q5T8U9|Q5T8U9_HUMAN UPF0586 protein C9orf41 OS=Homo sapiens GN=C9orf41 PE=2 SV=1;>tr|B4DSD4|B4DSD4_HUMAN UPF0586 protein C9orf41 OS=Homo sapiens GN=C9orf41 PE=2 SV=1;>t	4	1	1	1	2.7	2.7	2.7	47.185	409	409;153;196;238	NaN	NaN	NaN	NaN	NaN	NaN	NaN	NaN	NaN	NaN	NaN	NaN	NaN	NaN	NaN	NaN	NaN	NaN	NaN	NaN	NaN	NaN	NaN	NaN	NaN	NaN	NaN	NaN	NaN	NaN	NaN	NaN
Q9UKA9;Q9UKA9-2;Q9UKA9-4;Q9UKA9-3;B4DSS8;B4DI28;Q9UKA9-5;Q9UKA9-6	Q9UKA9;Q9UKA9-2;Q9UKA9-4;Q9UKA9-3;B4DSS8;B4DI28;Q9UKA9-5;Q9UKA9-6	8;8;8;8;8;6;6;6	8;8;8;8;8;6;6;6	8;8;8;8;8;6;6;6	Polypyrimidine tract-binding protein 2	PTBP2	>sp|Q9UKA9|PTBP2_HUMAN Polypyrimidine tract-binding protein 2 OS=Homo sapiens GN=PTBP2 PE=1 SV=1;>sp|Q9UKA9-2|PTBP2_HUMAN Isoform 2 of Polypyrimidine tract-binding protein 2 OS=Homo sapiens GN=PTBP2;>sp|Q9UKA9-4|PTBP2_HUMAN Isoform 4 of Polypyrimidine trac	8	8	8	8	20.5	20.5	20.5	57.49	531	531;532;536;537;548;325;356;361	NaN	NaN	NaN	NaN	NaN	NaN	NaN	NaN	NaN	NaN	NaN	NaN	NaN	NaN	1.2728	NaN	NaN	NaN	0.25979	0.89526	NaN	NaN	NaN	NaN	0.3251	0.87825	0.25493	0.85706	0.85096	NaN	NaN	0.31557
O43463;B4DST0	O43463;B4DST0	5;5	5;5	5;5	Histone-lysine N-methyltransferase SUV39H1	SUV39H1	>sp|O43463|SUV91_HUMAN Histone-lysine N-methyltransferase SUV39H1 OS=Homo sapiens GN=SUV39H1 PE=1 SV=1;>tr|B4DST0|B4DST0_HUMAN Histone-lysine N-methyltransferase SUV39H1 OS=Homo sapiens GN=SUV39H1 PE=2 SV=1	2	5	5	5	11.9	11.9	11.9	47.907	412	412;423	NaN	NaN	NaN	NaN	NaN	0.94006	NaN	NaN	NaN	NaN	NaN	NaN	NaN	NaN	NaN	NaN	NaN	NaN	1.1702	NaN	NaN	NaN	NaN	1.0055	NaN	NaN	NaN	NaN	NaN	NaN	NaN	NaN
Q7Z3B4;B4DT35;E7EUM5;Q7Z3B4-2	Q7Z3B4;B4DT35;E7EUM5;Q7Z3B4-2	16;16;14;12	16;16;14;12	16;16;14;12	Nucleoporin p54	NUP54	>sp|Q7Z3B4|NUP54_HUMAN Nucleoporin p54 OS=Homo sapiens GN=NUP54 PE=1 SV=2;>tr|B4DT35|B4DT35_HUMAN Nucleoporin p54 OS=Homo sapiens GN=NUP54 PE=2 SV=1;>tr|E7EUM5|E7EUM5_HUMAN Nucleoporin p54 OS=Homo sapiens GN=NUP54 PE=2 SV=2;>sp|Q7Z3B4-2|NUP54_HUMAN Isoform	4	16	16	16	42	42	42	55.435	507	507;459;327;291	0.82717	1.1118	1.024	1.0386	1.4986	1.4629	1.4361	1.1678	1.4509	1.1442	1.1434	1.2464	1.1493	1.2883	1.2059	1.178	0.99822	1.1389	0.97472	1.3044	1.1515	1.0967	1.242	1.122	0.98187	1.167	1.0704	1.1334	1.3057	1.0472	1.1099	1.1726
P20073;B4DT77;P20073-2	P20073;B4DT77;P20073-2	15;15;15	15;15;15	15;15;15	Annexin A7;Annexin	ANXA7	>sp|P20073|ANXA7_HUMAN Annexin A7 OS=Homo sapiens GN=ANXA7 PE=1 SV=3;>tr|B4DT77|B4DT77_HUMAN Annexin OS=Homo sapiens GN=ANXA7 PE=2 SV=1;>sp|P20073-2|ANXA7_HUMAN Isoform 2 of Annexin A7 OS=Homo sapiens GN=ANXA7	3	15	15	15	33.4	33.4	33.4	52.739	488	488;336;466	0.88291	0.98897	1.1027	0.90266	1.2224	0.99331	1.2204	0.9307	1.0975	1.0206	1.101	1.0502	1.0639	1.3218	1.0844	1.1757	0.91544	1.081	1.0284	1.1042	0.96316	1.244	1.1473	1.0008	0.96516	1.1654	1.0828	1.1624	1.0862	1.0296	1.2465	1.1049
Q8ND24;E9PN76;B4DTD1	Q8ND24;E9PN76;B4DTD1	4;4;4	4;4;4	4;4;4	RING finger protein 214	RNF214	>sp|Q8ND24|RN214_HUMAN RING finger protein 214 OS=Homo sapiens GN=RNF214 PE=1 SV=2;>tr|E9PN76|E9PN76_HUMAN RING finger protein 214 OS=Homo sapiens GN=RNF214 PE=2 SV=1;>tr|B4DTD1|B4DTD1_HUMAN RING finger protein 214 OS=Homo sapiens GN=RNF214 PE=2 SV=1	3	4	4	4	6.5	6.5	6.5	77.667	703	703;513;548	NaN	NaN	NaN	NaN	NaN	NaN	NaN	NaN	NaN	NaN	NaN	NaN	NaN	NaN	NaN	NaN	NaN	NaN	NaN	NaN	NaN	NaN	NaN	NaN	NaN	NaN	NaN	NaN	NaN	NaN	NaN	NaN
O15162;B4DTE8;C9J7K9;H7C5I5;C9J0H3;C9J9P4;C9JE06	O15162;B4DTE8;C9J7K9;H7C5I5;C9J0H3;C9J9P4;C9JE06	2;2;2;1;1;1;1	2;2;2;1;1;1;1	2;2;2;1;1;1;1	Phospholipid scramblase 1	PLSCR1	>sp|O15162|PLS1_HUMAN Phospholipid scramblase 1 OS=Homo sapiens GN=PLSCR1 PE=1 SV=1;>tr|B4DTE8|B4DTE8_HUMAN Phospholipid scramblase 1 OS=Homo sapiens GN=PLSCR1 PE=2 SV=1;>tr|C9J7K9|C9J7K9_HUMAN Phospholipid scramblase 1 OS=Homo sapiens GN=PLSCR1 PE=4 SV=1;	7	2	2	2	7.2	7.2	7.2	35.049	318	318;237;311;171;171;248;249	NaN	NaN	NaN	NaN	NaN	NaN	NaN	NaN	NaN	NaN	NaN	NaN	NaN	NaN	NaN	NaN	NaN	NaN	NaN	NaN	NaN	NaN	NaN	NaN	NaN	NaN	NaN	NaN	NaN	NaN	NaN	NaN
Q8ND56;B4DTG6;Q8ND56-2;I3L420;K7EMZ9;I3L3F8	Q8ND56;B4DTG6;Q8ND56-2;I3L420;K7EMZ9	7;7;7;5;4;1	7;7;7;5;4;1	7;7;7;5;4;1	Protein LSM14 homolog A	LSM14A	>sp|Q8ND56|LS14A_HUMAN Protein LSM14 homolog A OS=Homo sapiens GN=LSM14A PE=1 SV=3;>tr|B4DTG6|B4DTG6_HUMAN Protein LSM14 homolog A OS=Homo sapiens GN=LSM14A PE=2 SV=1;>sp|Q8ND56-2|LS14A_HUMAN Isoform 2 of Protein LSM14 homolog A OS=Homo sapiens GN=LSM14A;>	6	7	7	7	17.1	17.1	17.1	50.529	463	463;422;463;344;333;80	NaN	NaN	NaN	NaN	NaN	NaN	NaN	NaN	NaN	NaN	NaN	NaN	NaN	NaN	NaN	NaN	NaN	NaN	NaN	NaN	NaN	NaN	NaN	NaN	NaN	NaN	NaN	NaN	NaN	NaN	0.9317	NaN
P20936;P20936-2;B4DTL2;E9PGC0;Q68CU6	P20936;P20936-2;B4DTL2;E9PGC0	4;4;4;4;1	4;4;4;4;1	4;4;4;4;1	Ras GTPase-activating protein 1	RASA1	>sp|P20936|RASA1_HUMAN Ras GTPase-activating protein 1 OS=Homo sapiens GN=RASA1 PE=1 SV=1;>sp|P20936-2|RASA1_HUMAN Isoform 2 of Ras GTPase-activating protein 1 OS=Homo sapiens GN=RASA1;>tr|B4DTL2|B4DTL2_HUMAN Ras GTPase-activating protein 1 OS=Homo sapiens	5	4	4	4	5.8	5.8	5.8	116.4	1047	1047;870;880;881;539	NaN	NaN	NaN	NaN	NaN	NaN	NaN	NaN	NaN	NaN	NaN	NaN	NaN	NaN	NaN	NaN	NaN	NaN	NaN	NaN	NaN	NaN	NaN	NaN	NaN	NaN	NaN	NaN	NaN	NaN	NaN	NaN
Q13126;B4DUC8;Q13126-4;Q13126-3;Q13126-7;J3QSB7;Q13126-6;F2Z2F3;F8WES2;J3KRN1	Q13126;B4DUC8;Q13126-4;Q13126-3;Q13126-7;J3QSB7;Q13126-6	15;15;14;14;12;12;12;5;1;1	15;15;14;14;12;12;12;5;1;1	1;1;0;0;0;0;0;0;0;0	S-methyl-5-thioadenosine phosphorylase;Purine nucleoside phosphorylase	MTAP	>sp|Q13126|MTAP_HUMAN S-methyl-5-thioadenosine phosphorylase OS=Homo sapiens GN=MTAP PE=1 SV=2;>tr|B4DUC8|B4DUC8_HUMAN S-methyl-5-thioadenosine phosphorylase OS=Homo sapiens GN=MTAP PE=2 SV=1;>sp|Q13126-4|MTAP_HUMAN Isoform 4 of S-methyl-5-thioadenosine	10	15	15	1	77.7	77.7	3.9	31.236	283	283;300;280;334;239;242;293;143;50;112	0.93819	1.0924	1.1096	1.0292	1.1668	1.1468	1.11	1.0603	1.1089	1.0431	1.1349	1.094	1.2153	1.188	1.2788	1.1398	1.0394	1.148	0.9452	1.2248	1.1228	1.1347	1.2251	1.1332	0.90472	1.2026	1.1269	1.1506	1.2188	1.1185	1.1577	1.1638
Q15746;B4DUE3;Q15746-7;Q15746-4;Q15746-5;Q15746-2;Q15746-3;Q15746-6	Q15746;B4DUE3;Q15746-7;Q15746-4;Q15746-5;Q15746-2;Q15746-3;Q15746-6	2;2;2;2;2;2;2;2	2;2;2;2;2;2;2;2	2;2;2;2;2;2;2;2	Myosin light chain kinase, smooth muscle;Myosin light chain kinase, smooth muscle, deglutamylated form	MYLK	>sp|Q15746|MYLK_HUMAN Myosin light chain kinase, smooth muscle OS=Homo sapiens GN=MYLK PE=1 SV=4;>tr|B4DUE3|B4DUE3_HUMAN Myosin light chain kinase, smooth muscle OS=Homo sapiens GN=MYLK PE=2 SV=1;>sp|Q15746-7|MYLK_HUMAN Isoform 5 of Myosin light chain kina	8	2	2	2	0.9	0.9	0.9	210.71	1914	1914;714;992;1794;1841;1845;1863;1913	NaN	NaN	NaN	NaN	NaN	NaN	NaN	NaN	NaN	NaN	NaN	NaN	NaN	NaN	NaN	NaN	NaN	NaN	NaN	NaN	NaN	NaN	NaN	NaN	NaN	NaN	NaN	NaN	NaN	NaN	NaN	NaN
O95861;B4DUS9;O95861-2;A6NF51;B4DPS5;F8VZG4;F8W1J0;F8VVW8;F8VRY7	O95861;B4DUS9;O95861-2;A6NF51;B4DPS5;F8VZG4;F8W1J0	14;14;12;11;8;7;7;6;1	14;14;12;11;8;7;7;6;1	14;14;12;11;8;7;7;6;1	3(2),5-bisphosphate nucleotidase 1	BPNT1	>sp|O95861|BPNT1_HUMAN 3(2),5-bisphosphate nucleotidase 1 OS=Homo sapiens GN=BPNT1 PE=1 SV=1;>tr|B4DUS9|B4DUS9_HUMAN 3(2),5-bisphosphate nucleotidase 1 OS=Homo sapiens GN=BPNT1 PE=2 SV=1;>sp|O95861-2|BPNT1_HUMAN Isoform 2 of 3(2),5-bisphosphate nu	9	14	14	14	52.9	52.9	52.9	33.392	308	308;272;325;291;253;136;170;128;116	1.0031	1.0338	1.0349	1.032	1.1012	1.1119	1.0697	1.0504	1.0959	1.1212	1.114	1.0981	1.1011	1.1136	1.2158	1.0631	1.1482	1.1458	1.0391	1.2105	1.0683	0.99195	1.1786	1.1324	0.98455	1.1485	1.1167	1.1824	1.0163	1.0654	1.1251	1.1782
H3BQM0;B4DV38;Q8NDF8;Q8NDF8-2;Q8NDF8-3;E9PC61;Q8NDF8-4	H3BQM0;B4DV38;Q8NDF8;Q8NDF8-2;Q8NDF8-3;E9PC61;Q8NDF8-4	4;4;3;3;3;3;2	4;4;3;3;3;3;2	4;4;3;3;3;3;2	PAP-associated domain-containing protein 5	PAPD5	>tr|H3BQM0|H3BQM0_HUMAN PAP-associated domain-containing protein 5 OS=Homo sapiens GN=PAPD5 PE=2 SV=1;>tr|B4DV38|B4DV38_HUMAN PAP-associated domain-containing protein 5 OS=Homo sapiens GN=PAPD5 PE=2 SV=1;>sp|Q8NDF8|PAPD5_HUMAN PAP-associated domain-contain	7	4	4	4	8.8	8.8	8.8	64.693	588	588;698;572;465;585;619;370	NaN	NaN	NaN	NaN	NaN	NaN	NaN	NaN	NaN	NaN	NaN	NaN	NaN	NaN	NaN	NaN	NaN	NaN	NaN	NaN	NaN	NaN	NaN	NaN	NaN	NaN	NaN	NaN	NaN	NaN	NaN	NaN
B4DV96;Q9H477	B4DV96;Q9H477	2;2	2;2	2;2	Ribokinase	RBKS	>tr|B4DV96|B4DV96_HUMAN Ribokinase OS=Homo sapiens GN=RBKS PE=2 SV=1;>sp|Q9H477|RBSK_HUMAN Ribokinase OS=Homo sapiens GN=RBKS PE=1 SV=1	2	2	2	2	7	7	7	30.36	286	286;322	NaN	NaN	NaN	NaN	NaN	NaN	NaN	NaN	NaN	NaN	NaN	NaN	NaN	NaN	NaN	NaN	NaN	NaN	NaN	NaN	NaN	NaN	NaN	NaN	NaN	NaN	NaN	NaN	NaN	NaN	NaN	NaN
P50995;B4DVE7;H0Y6E1;P27216;E5RIN3;Q5T0G9;P27216-2	P50995;B4DVE7	17;17;4;1;1;1;1	17;17;4;1;1;1;1	17;17;4;1;1;1;1	Annexin A11;Annexin	ANXA11	>sp|P50995|ANX11_HUMAN Annexin A11 OS=Homo sapiens GN=ANXA11 PE=1 SV=1;>tr|B4DVE7|B4DVE7_HUMAN Annexin OS=Homo sapiens GN=ANXA11 PE=2 SV=1	7	17	17	17	33.7	33.7	33.7	54.389	505	505;472;148;316;113;204;357	0.99351	0.99371	1.1642	1.0161	1.0889	0.9785	1.0652	0.8764	1.0737	1.0708	1.0979	0.95683	0.97817	1.1388	1.0575	1.0156	0.95673	1.1058	1.0361	1.2195	0.99274	1.1136	1.0753	0.94322	0.91205	1.0766	1.1495	1.154	1.0753	1.0962	1.0947	1.0959
O15371;B4DVY1;B0QYA5;B0QYA3;B0QYA4;B0QYA6;B0QYA7;B0QYA8	O15371;B4DVY1	27;27;11;10;9;4;4;3	27;27;11;10;9;4;4;3	27;27;11;10;9;4;4;3	Eukaryotic translation initiation factor 3 subunit D	EIF3D	>sp|O15371|EIF3D_HUMAN Eukaryotic translation initiation factor 3 subunit D OS=Homo sapiens GN=EIF3D PE=1 SV=1;>tr|B4DVY1|B4DVY1_HUMAN Eukaryotic translation initiation factor 3 subunit D OS=Homo sapiens GN=EIF3D PE=2 SV=1	8	27	27	27	55.8	55.8	55.8	63.972	548	548;499;269;172;165;173;186;123	0.87559	1.1392	1.155	1.1399	1.3103	1.2992	1.1561	1.0401	1.1456	1.0831	1.1527	1.1199	1.1326	1.1746	1.294	1.1505	1.1141	1.2044	1.0051	1.2644	1.1874	1.0297	1.1623	1.1213	0.8921	1.1543	1.0897	1.1605	1.2596	1.1009	1.2759	1.2448
Q86WQ0;B4DW92;F5H0B6;K7ERL0;K7ES62	Q86WQ0;B4DW92	3;3;1;1;1	3;3;1;1;1	3;3;1;1;1	Nuclear receptor 2C2-associated protein	NR2C2AP	>sp|Q86WQ0|NR2CA_HUMAN Nuclear receptor 2C2-associated protein OS=Homo sapiens GN=NR2C2AP PE=1 SV=1;>tr|B4DW92|B4DW92_HUMAN Nuclear receptor 2C2-associated protein OS=Homo sapiens GN=NR2C2AP PE=2 SV=1	5	3	3	3	34.5	34.5	34.5	15.876	139	139;167;54;113;144	NaN	NaN	NaN	NaN	NaN	NaN	NaN	NaN	NaN	NaN	NaN	NaN	NaN	NaN	NaN	NaN	NaN	NaN	NaN	NaN	NaN	NaN	NaN	NaN	NaN	NaN	NaN	NaN	NaN	NaN	NaN	NaN
Q9UJ83;B4DWI1;B4DXI5;E9PEN4;B3KPX4;C9J306;C9JJM7	Q9UJ83;B4DWI1;B4DXI5;E9PEN4;B3KPX4	13;13;11;11;8;5;2	13;13;11;11;8;5;2	13;13;11;11;8;5;2	2-hydroxyacyl-CoA lyase 1	HACL1	>sp|Q9UJ83|HACL1_HUMAN 2-hydroxyacyl-CoA lyase 1 OS=Homo sapiens GN=HACL1 PE=1 SV=2;>tr|B4DWI1|B4DWI1_HUMAN 2-hydroxyacyl-CoA lyase 1 OS=Homo sapiens GN=HACL1 PE=2 SV=1;>tr|B4DXI5|B4DXI5_HUMAN 2-hydroxyacyl-CoA lyase 1 OS=Homo sapiens GN=HACL1 PE=2 SV=1;>t	7	13	13	13	34.3	34.3	34.3	63.728	578	578;551;496;518;337;244;157	NaN	NaN	NaN	1.1624	NaN	NaN	1.1191	NaN	NaN	NaN	NaN	NaN	0.85633	0.94864	NaN	1.0716	NaN	1.1312	1.0042	1.1445	1.0153	1.0327	1.0004	1.3572	0.85858	0.95088	NaN	1.2448	NaN	0.90624	0.90621	1.3553
P40616;B4DWW1;F8VYN9;B4DZG7;F8VP99;F8VP63	P40616;B4DWW1;F8VYN9;B4DZG7	7;7;7;6;1;1	7;7;7;6;1;1	7;7;7;6;1;1	ADP-ribosylation factor-like protein 1	ARL1	>sp|P40616|ARL1_HUMAN ADP-ribosylation factor-like protein 1 OS=Homo sapiens GN=ARL1 PE=1 SV=1;>tr|B4DWW1|B4DWW1_HUMAN ADP-ribosylation factor-like protein 1 OS=Homo sapiens GN=ARL1 PE=2 SV=1;>tr|F8VYN9|F8VYN9_HUMAN ADP-ribosylation factor-like protein 1 O	6	7	7	7	51.4	51.4	51.4	20.417	181	181;164;194;135;17;64	NaN	0.96409	0.81267	0.9531	0.94134	0.97446	1.0576	0.93337	1.1206	1.0696	0.95728	1.1254	1.199	1.0318	0.83943	0.90399	1.0358	0.95568	1.0097	1.2348	1.0109	1.0914	1.1597	1.0098	1.1686	1.0667	1.1955	0.97896	1.109	1.1204	1.1261	1.279
B4DXX7;O15523;B4E132;C9J081;C9J8G5	B4DXX7;O15523;B4E132	27;26;16;8;5	2;1;1;2;1	2;1;1;2;1	ATP-dependent RNA helicase DDX3Y	DDX3Y	>tr|B4DXX7|B4DXX7_HUMAN ATP-dependent RNA helicase DDX3Y OS=Homo sapiens GN=DDX3Y PE=2 SV=1;>sp|O15523|DDX3Y_HUMAN ATP-dependent RNA helicase DDX3Y OS=Homo sapiens GN=DDX3Y PE=1 SV=2;>tr|B4E132|B4E132_HUMAN Uncharacterized protein OS=Homo sapiens GN=DDX3Y	5	27	2	2	44.3	3.5	3.5	72.931	657	657;660;407;250;224	NaN	NaN	NaN	NaN	NaN	NaN	NaN	NaN	NaN	NaN	NaN	NaN	NaN	NaN	NaN	NaN	NaN	NaN	0.94989	0.90188	0.98388	1.0063	1.1396	0.89031	0.81928	1.0311	0.92024	1.0589	NaN	0.98303	0.98837	0.97877
P51114;B4DXZ6;P51114-2;P51114-3;E9PFF5;E7EU85;H7C4S4;C9JZE0;C9JY20;C9JAJ4;C9IZ22;C9J5B4	P51114;B4DXZ6;P51114-2;P51114-3;E9PFF5;E7EU85	26;26;24;23;22;21;6;5;5;4;3;2	26;26;24;23;22;21;6;5;5;4;3;2	24;24;22;21;20;19;6;5;5;4;3;2	Fragile X mental retardation syndrome-related protein 1	FXR1	>sp|P51114|FXR1_HUMAN Fragile X mental retardation syndrome-related protein 1 OS=Homo sapiens GN=FXR1 PE=1 SV=3;>tr|B4DXZ6|B4DXZ6_HUMAN Fragile X mental retardation syndrome-related protein 1 OS=Homo sapiens GN=FXR1 PE=2 SV=1;>sp|P51114-2|FXR1_HUMAN Isofor	12	26	26	24	43.3	43.3	40.7	69.72	621	621;608;539;536;490;454;247;119;123;151;94;75	0.94897	1.1041	1.2534	1.1482	1.2305	1.2326	1.1779	1.0126	1.1327	1.0338	1.1741	1.1088	1.0155	1.108	1.1537	1.1971	1.0586	1.1967	1.0385	1.4056	1.0418	1.0535	1.1409	1.1395	0.99461	1.2182	1.1359	1.1889	1.2051	1.1727	1.1727	1.1489
P36897;P36897-3;B4DY26;P36897-2;F8W1R9;F8VXZ5	P36897;P36897-3;B4DY26;P36897-2;F8W1R9;F8VXZ5	4;4;4;4;3;2	4;4;4;4;3;2	4;4;4;4;3;2	TGF-beta receptor type-1	TGFBR1	>sp|P36897|TGFR1_HUMAN TGF-beta receptor type-1 OS=Homo sapiens GN=TGFBR1 PE=1 SV=1;>sp|P36897-3|TGFR1_HUMAN Isoform 3 of TGF-beta receptor type-1 OS=Homo sapiens GN=TGFBR1;>tr|B4DY26|B4DY26_HUMAN TGF-beta receptor type-1 OS=Homo sapiens GN=TGFBR1 PE=2 SV=	6	4	4	4	9.1	9.1	9.1	55.959	503	503;426;434;507;383;114	NaN	NaN	NaN	NaN	NaN	NaN	NaN	NaN	NaN	NaN	NaN	NaN	NaN	NaN	NaN	NaN	NaN	NaN	NaN	NaN	NaN	NaN	0.89305	NaN	NaN	NaN	NaN	NaN	NaN	NaN	NaN	NaN
Q8NFH5;B4DYB4;B4DP57;C9IYQ7;F8WCF5;F8WEL4;C9JWU7;C9JIY9	Q8NFH5;B4DYB4;B4DP57	9;9;6;2;2;2;1;1	9;9;6;2;2;2;1;1	9;9;6;2;2;2;1;1	Nucleoporin NUP53	NUP35	>sp|Q8NFH5|NUP53_HUMAN Nucleoporin NUP53 OS=Homo sapiens GN=NUP35 PE=1 SV=1;>tr|B4DYB4|B4DYB4_HUMAN Nucleoporin NUP53 OS=Homo sapiens GN=NUP35 PE=2 SV=1;>tr|B4DP57|B4DP57_HUMAN Nucleoporin NUP53 OS=Homo sapiens GN=NUP35 PE=2 SV=1	8	9	9	9	40.8	40.8	40.8	34.773	326	326;309;191;115;136;152;53;76	1.035	NaN	NaN	NaN	1.0993	NaN	NaN	NaN	NaN	NaN	NaN	NaN	NaN	NaN	NaN	NaN	NaN	1.422	NaN	NaN	NaN	NaN	NaN	NaN	NaN	0.81084	NaN	NaN	NaN	NaN	NaN	NaN
P15586;H7C3P4;B4DYH8;F6S8M0;F5H260;F5H4C6;H0YFA9	P15586;H7C3P4;B4DYH8;F6S8M0;F5H260;F5H4C6;H0YFA9	12;12;12;12;9;7;7	12;12;12;12;9;7;7	12;12;12;12;9;7;7	N-acetylglucosamine-6-sulfatase	GNS	>sp|P15586|GNS_HUMAN N-acetylglucosamine-6-sulfatase OS=Homo sapiens GN=GNS PE=1 SV=3;>tr|H7C3P4|H7C3P4_HUMAN Glucosamine (N-acetyl)-6-sulfatase (Sanfilippo disease IIID), isoform CRA_b OS=Homo sapiens GN=GNS PE=4 SV=1;>tr|B4DYH8|B4DYH8_HUMAN N-acetylgluco	7	12	12	12	30.3	30.3	30.3	62.081	552	552;496;532;584;344;248;303	0.99309	1.0811	1.0726	0.87512	0.97136	0.89764	0.92589	1.1206	1.1047	1.0487	1.1381	1.1963	1.2637	1.0216	1.4228	1.0699	1.0156	0.8748	0.93421	1.1959	1.1956	1.443	1.2912	1.2064	0.79228	1.1289	0.98838	1.1303	1.1339	1.2304	1.3641	1.1501
Q9UJ41;Q9UJ41-2;E9PFK9;B4DZM7;Q9UJ41-3;E7ERJ8	Q9UJ41;Q9UJ41-2;E9PFK9;B4DZM7;Q9UJ41-3;E7ERJ8	7;7;7;7;7;7	7;7;7;7;7;7	7;7;7;7;7;7	Rab5 GDP/GTP exchange factor	RABGEF1;KCTD7	>sp|Q9UJ41|RABX5_HUMAN Rab5 GDP/GTP exchange factor OS=Homo sapiens GN=RABGEF1 PE=1 SV=2;>sp|Q9UJ41-2|RABX5_HUMAN Isoform 2 of Rab5 GDP/GTP exchange factor OS=Homo sapiens GN=RABGEF1;>tr|E9PFK9|E9PFK9_HUMAN Rab5 GDP/GTP exchange factor OS=Homo sapiens GN=R	6	7	7	7	10.6	10.6	10.6	79.37	708	708;491;504;505;531;531	NaN	NaN	NaN	NaN	NaN	NaN	NaN	NaN	NaN	NaN	NaN	NaN	NaN	NaN	NaN	NaN	NaN	NaN	NaN	NaN	NaN	NaN	NaN	NaN	NaN	NaN	NaN	NaN	NaN	NaN	NaN	NaN
B4E022	B4E022	40	1	1		TKT	>tr|B4E022|B4E022_HUMAN Transketolase OS=Homo sapiens GN=TKT PE=2 SV=1	1	40	1	1	82.8	1.6	1.6	62.878	576	576	NaN	NaN	NaN	NaN	NaN	NaN	NaN	NaN	NaN	NaN	NaN	NaN	NaN	NaN	NaN	NaN	NaN	NaN	NaN	NaN	NaN	NaN	NaN	NaN	NaN	NaN	NaN	NaN	NaN	NaN	NaN	NaN
P11234;Q6ZS74;B4E040;C9J6B1;C9JQB3;F8WEQ6;C9JPE8;C9JYR1	P11234;Q6ZS74;B4E040;C9J6B1;C9JQB3	4;4;4;3;2;1;1;1	2;2;2;2;1;0;0;0	2;2;2;2;1;0;0;0	Ras-related protein Ral-B	RALB	>sp|P11234|RALB_HUMAN Ras-related protein Ral-B OS=Homo sapiens GN=RALB PE=1 SV=1;>tr|Q6ZS74|Q6ZS74_HUMAN Ras-related protein Ral-B OS=Homo sapiens GN=RALB PE=2 SV=1;>tr|B4E040|B4E040_HUMAN Ras-related protein Ral-B OS=Homo sapiens GN=RALB PE=2 SV=1;>tr|C9	8	4	2	2	22.3	13.6	13.6	23.408	206	206;227;228;167;171;46;101;112	NaN	NaN	NaN	NaN	NaN	NaN	NaN	NaN	NaN	NaN	NaN	NaN	NaN	NaN	NaN	NaN	NaN	NaN	NaN	NaN	NaN	NaN	NaN	NaN	NaN	NaN	NaN	NaN	NaN	NaN	NaN	NaN
Q15629;G3XAN4;B4E0K2	Q15629;G3XAN4;B4E0K2	5;5;5	5;5;5	5;5;5	Translocating chain-associated membrane protein 1	TRAM1	>sp|Q15629|TRAM1_HUMAN Translocating chain-associated membrane protein 1 OS=Homo sapiens GN=TRAM1 PE=1 SV=3;>tr|G3XAN4|G3XAN4_HUMAN Translocating chain-associated membrane protein 1 OS=Homo sapiens GN=TRAM1 PE=4 SV=1;>tr|B4E0K2|B4E0K2_HUMAN Translocating c	3	5	5	5	8.8	8.8	8.8	43.071	374	374;288;343	NaN	NaN	NaN	NaN	NaN	NaN	NaN	NaN	NaN	NaN	NaN	NaN	NaN	NaN	NaN	NaN	NaN	NaN	1.1211	NaN	NaN	1.3139	NaN	NaN	NaN	NaN	NaN	NaN	NaN	NaN	NaN	NaN
Q9NYZ1;K7ENL4;J3QL63;J3QL47;B4E0Q0;Q96ET8-3;J3KS67;C9JYS5	Q9NYZ1;K7ENL4;J3QL63;J3QL47;B4E0Q0;Q96ET8-3;J3KS67;C9JYS5	1;1;1;1;1;1;1;1	1;1;1;1;1;1;1;1	1;1;1;1;1;1;1;1	Golgi apparatus membrane protein TVP23 homolog B	TVP23B;TVP23C	>sp|Q9NYZ1|TV23B_HUMAN Golgi apparatus membrane protein TVP23 homolog B OS=Homo sapiens GN=TVP23B PE=2 SV=2;>tr|K7ENL4|K7ENL4_HUMAN Golgi apparatus membrane protein TVP23 homolog B (Fragment) OS=Homo sapiens GN=TVP23B PE=4 SV=1;>tr|J3QL63|J3QL63_HUMAN Golg	8	1	1	1	5.9	5.9	5.9	23.576	205	205;132;141;141;185;203;203;205	NaN	NaN	NaN	NaN	NaN	NaN	NaN	NaN	NaN	NaN	NaN	NaN	NaN	NaN	NaN	NaN	NaN	NaN	NaN	NaN	NaN	NaN	NaN	NaN	NaN	NaN	NaN	NaN	NaN	NaN	NaN	NaN
P50542;P50542-2;P50542-4;B4E0T2;P50542-3;F5H5C0;F5H3X7;J3KPV0;F5H432;F5GXX3;F5H205;F5GZ41;F5H0L9;F5GYB4;F5H637;H0YGT8	P50542;P50542-2;P50542-4;B4E0T2;P50542-3	11;11;11;11;9;5;3;3;2;2;2;2;2;2;2;1	11;11;11;11;9;5;3;3;2;2;2;2;2;2;2;1	11;11;11;11;9;5;3;3;2;2;2;2;2;2;2;1	Peroxisomal targeting signal 1 receptor	PEX5	>sp|P50542|PEX5_HUMAN Peroxisomal targeting signal 1 receptor OS=Homo sapiens GN=PEX5 PE=1 SV=3;>sp|P50542-2|PEX5_HUMAN Isoform 2 of Peroxisomal targeting signal 1 receptor OS=Homo sapiens GN=PEX5;>sp|P50542-4|PEX5_HUMAN Isoform 4 of Peroxisomal targeting	16	11	11	11	23.8	23.8	23.8	70.864	639	639;602;654;660;631;272;248;410;102;104;114;115;119;128;168;31	NaN	NaN	NaN	NaN	NaN	0.88881	NaN	NaN	1.0221	0.87114	NaN	1.0083	1.1586	0.98867	NaN	NaN	NaN	NaN	0.7779	1.0552	NaN	0.78395	1.3276	NaN	1.0562	2.3053	NaN	1.02	0.90576	0.76299	NaN	0.90776
Q9P289;Q8NBY1;B4E0Y9;Q9P289-2;Q9P289-3;C9JJV0	Q9P289;Q8NBY1;B4E0Y9;Q9P289-2;Q9P289-3	21;21;21;17;15;2	21;21;21;17;15;2	13;13;13;11;8;0	Serine/threonine-protein kinase MST4	MST4	>sp|Q9P289|MST4_HUMAN Serine/threonine-protein kinase MST4 OS=Homo sapiens GN=MST4 PE=1 SV=2;>tr|Q8NBY1|Q8NBY1_HUMAN Serine/threonine-protein kinase MST4 OS=Homo sapiens GN=MST4 PE=2 SV=1;>tr|B4E0Y9|B4E0Y9_HUMAN Serine/threonine-protein kinase MST4 OS=Homo	6	21	21	13	53.4	53.4	36.3	46.528	416	416;392;438;339;354;79	0.87169	1.1109	1.1027	1.0482	1.1342	1.0603	1.1307	1.066	1.2122	1.2318	1.146	0.99987	1.0591	1.1634	1.3781	1.1525	1.1123	1.1762	0.96962	1.1725	1.0326	1.0043	1.2205	1.159	0.88326	1.0929	1.0603	1.1752	1.1572	1.2046	1.0509	1.1385
Q9NVS9;B4E1D7;B4E0V0;B4E152;J3QQV6	Q9NVS9;B4E1D7;B4E0V0;B4E152	8;8;6;6;3	8;8;6;6;3	8;8;6;6;3	Pyridoxine-5-phosphate oxidase	PNPO	>sp|Q9NVS9|PNPO_HUMAN Pyridoxine-5-phosphate oxidase OS=Homo sapiens GN=PNPO PE=1 SV=1;>tr|B4E1D7|B4E1D7_HUMAN Pyridoxine-5-phosphate oxidase OS=Homo sapiens GN=PNPO PE=2 SV=1;>tr|B4E0V0|B4E0V0_HUMAN Pyridoxine-5-phosphate oxidase OS=Homo sapiens GN=PNP	5	8	8	8	40.6	40.6	40.6	29.988	261	261;243;166;218;120	NaN	NaN	0.90522	0.92621	NaN	NaN	NaN	NaN	NaN	0.7328	NaN	0.80866	1.0293	NaN	NaN	1.0039	NaN	0.66319	NaN	1.566	NaN	NaN	1.2408	NaN	NaN	1.3786	NaN	NaN	NaN	NaN	NaN	NaN
Q9BUN8;B4E1G1;Q9BUN8-2;E5RGY0	Q9BUN8;B4E1G1;Q9BUN8-2;E5RGY0	3;3;3;2	3;3;3;2	3;3;3;2	Derlin-1	DERL1	>sp|Q9BUN8|DERL1_HUMAN Derlin-1 OS=Homo sapiens GN=DERL1 PE=1 SV=1;>tr|B4E1G1|B4E1G1_HUMAN Derlin-1 OS=Homo sapiens GN=DERL1 PE=2 SV=1;>sp|Q9BUN8-2|DERL1_HUMAN Isoform 2 of Derlin-1 OS=Homo sapiens GN=DERL1;>tr|E5RGY0|E5RGY0_HUMAN Derlin-1 OS=Homo sapiens	4	3	3	3	13.1	13.1	13.1	28.8	251	251;151;231;151	NaN	NaN	NaN	NaN	NaN	NaN	NaN	NaN	NaN	NaN	NaN	NaN	NaN	NaN	NaN	NaN	NaN	NaN	NaN	NaN	NaN	NaN	NaN	NaN	NaN	NaN	NaN	NaN	NaN	NaN	NaN	NaN
P51570;B4E1G6;K7ERJ9;K7EII7	P51570;B4E1G6	13;13;4;4	13;13;4;4	13;13;4;4	Galactokinase	GALK1	>sp|P51570|GALK1_HUMAN Galactokinase OS=Homo sapiens GN=GALK1 PE=1 SV=1;>tr|B4E1G6|B4E1G6_HUMAN Galactokinase OS=Homo sapiens GN=GALK1 PE=2 SV=1	4	13	13	13	43.9	43.9	43.9	42.272	392	392;422;120;184	0.74856	0.98042	1.0988	1.1023	0.92366	NaN	0.96909	NaN	NaN	0.94782	1.1268	NaN	0.89846	NaN	1.2658	0.9429	NaN	1.0321	1.3177	1.305	1.4717	1.1543	1.3549	1.2366	0.88138	1.4235	1.2422	1.2228	1.3293	1.2658	1.2652	1.3326
Q96AQ6;B4E1J0;F5H2F6;Q96AQ6-2;Q96AQ6-3	Q96AQ6;B4E1J0;F5H2F6;Q96AQ6-2;Q96AQ6-3	7;7;7;7;6	7;7;7;7;6	7;7;7;7;6	Pre-B-cell leukemia transcription factor-interacting protein 1	PBXIP1	>sp|Q96AQ6|PBIP1_HUMAN Pre-B-cell leukemia transcription factor-interacting protein 1 OS=Homo sapiens GN=PBXIP1 PE=1 SV=1;>tr|B4E1J0|B4E1J0_HUMAN Pre-B-cell leukemia transcription factor-interacting protein 1 OS=Homo sapiens GN=PBXIP1 PE=2 SV=1;>tr|F5H2F6|	5	7	7	7	11.1	11.1	11.1	80.642	731	731;558;576;702;662	NaN	NaN	NaN	NaN	NaN	NaN	NaN	NaN	NaN	NaN	NaN	NaN	NaN	NaN	NaN	NaN	NaN	0.99798	NaN	NaN	NaN	NaN	NaN	NaN	NaN	NaN	NaN	NaN	NaN	NaN	NaN	NaN
P31431;B4E1S6;P31431-2	P31431;B4E1S6;P31431-2	1;1;1	1;1;1	1;1;1	Syndecan-4;Syndecan	SDC4	>sp|P31431|SDC4_HUMAN Syndecan-4 OS=Homo sapiens GN=SDC4 PE=1 SV=2;>tr|B4E1S6|B4E1S6_HUMAN Syndecan OS=Homo sapiens GN=SDC4 PE=2 SV=1;>sp|P31431-2|SDC4_HUMAN Isoform 2 of Syndecan-4 OS=Homo sapiens GN=SDC4	3	1	1	1	7.1	7.1	7.1	21.641	198	198;126;153	NaN	NaN	NaN	NaN	NaN	NaN	NaN	NaN	NaN	NaN	NaN	NaN	NaN	NaN	NaN	NaN	NaN	NaN	NaN	NaN	NaN	NaN	NaN	NaN	NaN	NaN	NaN	NaN	NaN	NaN	NaN	NaN
P84103;B4E241	P84103;B4E241	9;9	9;9	8;8	Serine/arginine-rich splicing factor 3	SRSF3;SFRS3	>sp|P84103|SRSF3_HUMAN Serine/arginine-rich splicing factor 3 OS=Homo sapiens GN=SRSF3 PE=1 SV=1;>tr|B4E241|B4E241_HUMAN Serine/arginine-rich-splicing factor 3 OS=Homo sapiens GN=SFRS3 PE=2 SV=1	2	9	9	8	45.7	45.7	45.7	19.329	164	164;124	0.94593	1.0258	1.0193	0.96785	1.1433	1.0819	1.1639	1.024	1.0558	1.0469	1.0975	1.0325	1.0432	1.1204	1.2365	1.0435	1.056	1.061	1.0055	1.1801	1.0976	1.1186	1.1444	1.0577	0.85666	1.1652	1.0305	1.139	1.114	1.1163	1.065	1.1129
Q9BVC5;C9J4K0;B4E2G9	Q9BVC5;C9J4K0;B4E2G9	2;2;2	2;2;2	2;2;2	Ashwin	C2orf49	>sp|Q9BVC5|ASHWN_HUMAN Ashwin OS=Homo sapiens GN=C2orf49 PE=1 SV=1;>tr|C9J4K0|C9J4K0_HUMAN Ashwin OS=Homo sapiens GN=C2orf49 PE=2 SV=1;>tr|B4E2G9|B4E2G9_HUMAN Ashwin OS=Homo sapiens GN=C2orf49 PE=2 SV=1	3	2	2	2	14.2	14.2	14.2	25.858	232	232;190;228	NaN	NaN	1.2514	NaN	1.0505	NaN	NaN	NaN	NaN	NaN	NaN	NaN	NaN	NaN	1.1009	NaN	1.1399	NaN	NaN	1.0721	NaN	NaN	NaN	NaN	NaN	0.94645	NaN	NaN	NaN	NaN	1.1503	NaN
Q8WZA0;B4E2N0;K7ES95	Q8WZA0;B4E2N0;K7ES95	4;4;2	4;4;2	4;4;2	Protein LZIC	LZIC	>sp|Q8WZA0|LZIC_HUMAN Protein LZIC OS=Homo sapiens GN=LZIC PE=1 SV=1;>tr|B4E2N0|B4E2N0_HUMAN Protein LZIC OS=Homo sapiens GN=LZIC PE=2 SV=1;>tr|K7ES95|K7ES95_HUMAN Protein LZIC (Fragment) OS=Homo sapiens GN=LZIC PE=4 SV=1	3	4	4	4	28.9	28.9	28.9	21.494	190	190;211;169	NaN	NaN	NaN	NaN	NaN	NaN	NaN	NaN	NaN	NaN	NaN	NaN	NaN	NaN	NaN	NaN	NaN	NaN	NaN	NaN	NaN	NaN	NaN	NaN	NaN	NaN	NaN	NaN	NaN	NaN	NaN	NaN
Q9UNL2;C9JA28;B4E2P2	Q9UNL2;C9JA28;B4E2P2	1;1;1	1;1;1	1;1;1	Translocon-associated protein subunit gamma	SSR3	>sp|Q9UNL2|SSRG_HUMAN Translocon-associated protein subunit gamma OS=Homo sapiens GN=SSR3 PE=1 SV=1;>tr|C9JA28|C9JA28_HUMAN Translocon-associated protein subunit gamma OS=Homo sapiens GN=SSR3 PE=2 SV=1;>tr|B4E2P2|B4E2P2_HUMAN Translocon-associated protein	3	1	1	1	7.6	7.6	7.6	21.08	185	185;174;198	NaN	NaN	NaN	NaN	NaN	NaN	NaN	1.015	NaN	NaN	NaN	NaN	NaN	NaN	NaN	NaN	NaN	NaN	0.95222	1.2628	1.2185	1.082	1.2409	0.99652	0.9466	1.0669	1.1965	1.1736	1.2082	1.2183	1.0732	1.2866
P13473;P13473-2;B4E2S7;P13473-3;B7Z2R9;H0YCG2	P13473;P13473-2;B4E2S7;P13473-3;B7Z2R9	4;4;4;4;3;1	4;4;4;4;3;1	4;4;4;4;3;1	Lysosome-associated membrane glycoprotein 2	LAMP2	>sp|P13473|LAMP2_HUMAN Lysosome-associated membrane glycoprotein 2 OS=Homo sapiens GN=LAMP2 PE=1 SV=2;>sp|P13473-2|LAMP2_HUMAN Isoform LAMP-2B of Lysosome-associated membrane glycoprotein 2 OS=Homo sapiens GN=LAMP2;>tr|B4E2S7|B4E2S7_HUMAN Lysosome-associat	6	4	4	4	9.3	9.3	9.3	44.96	410	410;410;363;411;300;258	1.0615	1.3046	0.89632	1.0391	1.8321	NaN	NaN	NaN	NaN	NaN	NaN	NaN	NaN	NaN	NaN	NaN	NaN	NaN	0.80819	0.94222	NaN	0.96995	1.0272	0.90163	0.79552	0.8787	0.94459	1.0536	0.83592	0.96637	0.96417	1.0822
P27105;B4E2V5;P27105-2	P27105;B4E2V5;P27105-2	6;6;3	6;6;3	6;6;3	Erythrocyte band 7 integral membrane protein	STOM	>sp|P27105|STOM_HUMAN Erythrocyte band 7 integral membrane protein OS=Homo sapiens GN=STOM PE=1 SV=3;>tr|B4E2V5|B4E2V5_HUMAN Erythrocyte band 7 integral membrane protein OS=Homo sapiens GN=STOM PE=2 SV=1;>sp|P27105-2|STOM_HUMAN Isoform 2 of Erythrocyte ban	3	6	6	6	33.7	33.7	33.7	31.73	288	288;237;123	NaN	NaN	NaN	NaN	NaN	NaN	NaN	NaN	NaN	NaN	NaN	NaN	NaN	NaN	NaN	NaN	NaN	NaN	NaN	NaN	0.61537	0.81653	0.96605	0.9353	0.75516	NaN	NaN	NaN	1.1666	0.8523	0.78621	0.82386
P55084;B4E2W0;F5GZQ3;B5MD38;C9JEY0;C9JE81;C9K0M0	P55084;B4E2W0;F5GZQ3;B5MD38	26;26;23;18;6;6;3	26;26;23;18;6;6;3	26;26;23;18;6;6;3	Trifunctional enzyme subunit beta, mitochondrial;3-ketoacyl-CoA thiolase	HADHB	>sp|P55084|ECHB_HUMAN Trifunctional enzyme subunit beta, mitochondrial OS=Homo sapiens GN=HADHB PE=1 SV=3;>tr|B4E2W0|B4E2W0_HUMAN 3-ketoacyl-CoA thiolase OS=Homo sapiens GN=HADHB PE=2 SV=1;>tr|F5GZQ3|F5GZQ3_HUMAN 3-ketoacyl-CoA thiolase OS=Homo sapiens GN=	7	26	26	26	67.5	67.5	67.5	51.294	474	474;452;459;351;150;176;85	0.94267	0.95892	1.4073	1.0782	1.1649	0.97108	1.2076	0.74382	1.0968	1.1551	1.0136	0.8821	1.1128	1.009	0.82696	1.3678	0.74112	1.3154	1.1133	0.96007	1.165	1.0448	1.0802	0.99025	0.93268	1.3435	1.1454	1.1215	1.0475	1.0767	1.0115	0.97088
Q8N6R0;Q8N6R0-3;B4E2X3;Q8N6R0-4;Q8N6R0-2;H3BLW2;Q8N6R0-1	Q8N6R0;Q8N6R0-3;B4E2X3;Q8N6R0-4;Q8N6R0-2;H3BLW2;Q8N6R0-1	12;12;12;10;8;8;6	12;12;12;10;8;8;6	12;12;12;10;8;8;6	Methyltransferase-like protein 13	METTL13	>sp|Q8N6R0|MET13_HUMAN Methyltransferase-like protein 13 OS=Homo sapiens GN=METTL13 PE=1 SV=1;>sp|Q8N6R0-3|MET13_HUMAN Isoform 3 of Methyltransferase-like protein 13 OS=Homo sapiens GN=METTL13;>tr|B4E2X3|B4E2X3_HUMAN Methyltransferase-like protein 13 OS=Ho	7	12	12	12	24.7	24.7	24.7	78.767	699	699;613;698;642;396;399;543	0.85599	NaN	1.4714	1.3331	NaN	1.078	1.1809	NaN	1.4738	1.0106	1.0999	0.99072	1.1925	0.86491	0.94703	0.78635	0.92329	1.2101	1.2145	1.4731	1.2035	NaN	NaN	1.1906	0.94323	1.2609	1.2497	NaN	1.2447	1.4404	NaN	NaN
Q93062-3;Q93062-4;Q93062-5;F5H357;Q93062;Q93062-2;B4E3T4;H0YBU9	Q93062-3;Q93062-4;Q93062-5;F5H357;Q93062;Q93062-2;B4E3T4	3;3;3;3;3;3;3;1	2;2;2;2;2;2;2;0	2;2;2;2;2;2;2;0	RNA-binding protein with multiple splicing	RBPMS	>sp|Q93062-3|RBPMS_HUMAN Isoform C of RNA-binding protein with multiple splicing OS=Homo sapiens GN=RBPMS;>sp|Q93062-4|RBPMS_HUMAN Isoform D of RNA-binding protein with multiple splicing OS=Homo sapiens GN=RBPMS;>sp|Q93062-5|RBPMS_HUMAN Isoform E of RNA-bi	8	3	2	2	17.8	13.2	13.2	24.276	219	219;143;152;153;196;204;224;119	NaN	NaN	NaN	NaN	NaN	NaN	NaN	NaN	NaN	NaN	NaN	NaN	NaN	NaN	NaN	NaN	NaN	NaN	NaN	NaN	NaN	NaN	NaN	NaN	NaN	NaN	NaN	NaN	NaN	NaN	NaN	NaN
Q96FF9;B5MBX0	Q96FF9;B5MBX0	3;3	3;3	3;3	Sororin	CDCA5	>sp|Q96FF9|CDCA5_HUMAN Sororin OS=Homo sapiens GN=CDCA5 PE=1 SV=1;>tr|B5MBX0|B5MBX0_HUMAN Sororin OS=Homo sapiens GN=CDCA5 PE=2 SV=1	2	3	3	3	17.9	17.9	17.9	27.6	252	252;307	NaN	NaN	NaN	NaN	NaN	NaN	NaN	NaN	NaN	NaN	NaN	NaN	NaN	NaN	NaN	NaN	NaN	NaN	NaN	NaN	NaN	NaN	NaN	NaN	NaN	NaN	NaN	NaN	NaN	NaN	NaN	NaN
Q86YP4;Q86YP4-2;B5MC40;H7C3H1;F5H7D9;B4DKZ7;C9JVY3;C9JMI3;C9JGN4;C9JHD7;C9JJK9	Q86YP4;Q86YP4-2;B5MC40;H7C3H1;F5H7D9;B4DKZ7	12;12;12;6;6;6;4;4;4;4;4	11;11;11;5;5;5;4;4;4;4;4	11;11;11;5;5;5;4;4;4;4;4	Transcriptional repressor p66-alpha	GATAD2A	>sp|Q86YP4|P66A_HUMAN Transcriptional repressor p66-alpha OS=Homo sapiens GN=GATAD2A PE=1 SV=1;>sp|Q86YP4-2|P66A_HUMAN Isoform 2 of Transcriptional repressor p66-alpha OS=Homo sapiens GN=GATAD2A;>tr|B5MC40|B5MC40_HUMAN GATA zinc finger domain containing 2A	11	12	11	11	27.6	25.9	25.9	68.062	633	633;608;634;257;262;436;93;126;139;168;177	0.94323	1.0293	0.99767	0.85504	0.83359	1.0161	0.74414	0.84887	0.9566	0.73124	1.0293	0.72834	0.76757	0.90395	1.0436	0.8244	0.80207	1.0592	0.9534	1.1068	0.8028	0.82952	0.9174	0.92216	0.53194	0.89303	NaN	0.95562	1.3713	0.831	0.95237	0.75514
B5MCF1;Q9UKV0-8;Q9UKV0;Q9UKV0-5;Q9UKV0-6;E7EX34;F8W9E0;C9JS87;Q9UKV0-3;Q9UKV0-4;Q9UKV0-7;C9JD56;C9IZS0;C9J1W4;Q9UKV0-2	B5MCF1;Q9UKV0-8;Q9UKV0;Q9UKV0-5;Q9UKV0-6;E7EX34;F8W9E0;C9JS87;Q9UKV0-3;Q9UKV0-4;Q9UKV0-7	3;3;2;2;2;2;2;2;2;2;2;1;1;1;1	3;3;2;2;2;2;2;2;2;2;2;1;1;1;1	3;3;2;2;2;2;2;2;2;2;2;1;1;1;1	Histone deacetylase 9	HDAC9	>tr|B5MCF1|B5MCF1_HUMAN Histone deacetylase 9 OS=Homo sapiens GN=HDAC9 PE=2 SV=2;>sp|Q9UKV0-8|HDAC9_HUMAN Isoform 8 of Histone deacetylase 9 OS=Homo sapiens GN=HDAC9;>sp|Q9UKV0|HDAC9_HUMAN Histone deacetylase 9 OS=Homo sapiens GN=HDAC9 PE=1 SV=2;>sp|Q9UKV0	15	3	3	3	5.5	5.5	5.5	64.245	577	577;588;1011;1066;1025;513;546;562;590;879;1069;110;138;148;923	NaN	NaN	NaN	NaN	NaN	NaN	NaN	NaN	NaN	NaN	NaN	NaN	0.75493	NaN	NaN	NaN	NaN	NaN	NaN	NaN	NaN	NaN	NaN	NaN	NaN	0.88949	0.87763	0.78913	0.86391	NaN	NaN	NaN
O00541;B5MCF9;O00541-2;B3KXD6;C9JXJ1;H7C267	O00541;B5MCF9;O00541-2;B3KXD6	12;12;11;6;5;1	12;12;11;6;5;1	12;12;11;6;5;1	Pescadillo homolog	PES1	>sp|O00541|PESC_HUMAN Pescadillo homolog OS=Homo sapiens GN=PES1 PE=1 SV=1;>tr|B5MCF9|B5MCF9_HUMAN Pescadillo homolog OS=Homo sapiens GN=PES1 PE=2 SV=1;>sp|O00541-2|PESC_HUMAN Isoform 2 of Pescadillo homolog OS=Homo sapiens GN=PES1;>tr|B3KXD6|B3KXD6_HUMAN	6	12	12	12	23.6	23.6	23.6	68.002	588	588;571;583;449;171;194	0.81921	1.6255	1.5473	1.4241	1.6239	1.2569	1.5169	1.4996	1.4412	1.3198	1.4301	1.3876	1.6549	1.5559	1.9508	1.3902	1.3998	1.4148	1.0422	1.6621	1.7046	1.6067	1.5517	1.5422	1.4083	1.7411	1.6111	1.721	1.4923	1.309	1.4825	1.8607
P0CG30;Q6ICJ4;B5MCL2;P0CG29	P0CG30;Q6ICJ4;B5MCL2;P0CG29	7;7;7;7	6;6;6;6	6;6;6;6	Glutathione S-transferase theta-2B;Glutathione S-transferase theta-2	GSTT2B;Em:AP000351.3;GSTT2	>sp|P0CG30|GSTT2_HUMAN Glutathione S-transferase theta-2B OS=Homo sapiens GN=GSTT2B PE=1 SV=1;>tr|Q6ICJ4|Q6ICJ4_HUMAN Em:AP000351.3 protein OS=Homo sapiens GN=Em:AP000351.3 PE=2 SV=1;>tr|B5MCL2|B5MCL2_HUMAN Glutathione S-transferase theta-2 OS=Homo sapiens	4	7	6	6	34	31.1	31.1	27.507	244	244;230;230;244	0.8771	1.1835	1.0872	1.0978	1.1916	1.1106	1.0718	0.98723	1.2032	1.0464	1.1697	1.2531	1.0608	1.2138	1.276	1.1988	1.0466	1.1873	0.84595	1.3143	1.3481	1.2503	1.3031	1.0933	0.89227	1.3155	1.1325	1.3371	1.2254	0.97881	NaN	1.1763
Q15084;B7Z254;F8WA83;B5MCQ5;Q15084-2	Q15084;B7Z254;F8WA83;B5MCQ5;Q15084-2	17;17;17;17;17	17;17;17;17;17	17;17;17;17;17	Protein disulfide-isomerase A6	PDIA6	>sp|Q15084|PDIA6_HUMAN Protein disulfide-isomerase A6 OS=Homo sapiens GN=PDIA6 PE=1 SV=1;>tr|B7Z254|B7Z254_HUMAN Protein disulfide-isomerase A6 OS=Homo sapiens GN=PDIA6 PE=2 SV=1;>tr|F8WA83|F8WA83_HUMAN Protein disulfide-isomerase A6 OS=Homo sapiens GN=PDI	5	17	17	17	48.4	48.4	48.4	48.121	440	440;437;445;488;492	0.91814	1.1518	1.0444	1.0496	1.173	1.1705	1.146	1.0158	1.2496	1.1073	1.1662	1.1271	1.0506	1.0995	1.2276	1.0669	1.1454	1.1316	1.0518	1.1438	1.0416	0.99408	1.0832	1.1632	0.82335	1.0783	1.0671	1.0576	1.1435	1.0573	1.1027	1.0896
Q9H0E9-2;Q9H0E9;H7C128;H7C179;Q9H0E9-4;B5MCW3;H7C127;F8WBH2;F8W820;C9JV05;Q9H0E9-3;F8WDX5;D6RID0;F8WCS7;H7C2P4;H0YA84;H0YAH7	Q9H0E9-2;Q9H0E9;H7C128;H7C179;Q9H0E9-4;B5MCW3;H7C127;F8WBH2;F8W820	6;6;6;6;6;6;6;3;3;2;2;1;1;1;1;1;1	6;6;6;6;6;6;6;3;3;2;2;1;1;1;1;1;1	6;6;6;6;6;6;6;3;3;2;2;1;1;1;1;1;1	Bromodomain-containing protein 8	BRD8	>sp|Q9H0E9-2|BRD8_HUMAN Isoform 2 of Bromodomain-containing protein 8 OS=Homo sapiens GN=BRD8;>sp|Q9H0E9|BRD8_HUMAN Bromodomain-containing protein 8 OS=Homo sapiens GN=BRD8 PE=1 SV=2;>tr|H7C128|H7C128_HUMAN Bromodomain-containing protein 8 (Fragment) OS=Ho	17	6	6	6	7.8	7.8	7.8	102.84	951	951;1235;857;861;866;878;892;79;837;122;757;39;48;67;187;195;292	NaN	NaN	NaN	NaN	NaN	NaN	NaN	NaN	NaN	NaN	1.134	1.0245	0.91667	NaN	0.97356	NaN	1.1111	NaN	NaN	NaN	NaN	NaN	NaN	NaN	NaN	NaN	NaN	NaN	NaN	NaN	NaN	NaN
P62826;B5MDF5;F5H018;B4DV51	P62826;B5MDF5;F5H018;B4DV51	14;14;12;7	14;14;12;7	1;1;0;0	GTP-binding nuclear protein Ran	RAN	>sp|P62826|RAN_HUMAN GTP-binding nuclear protein Ran OS=Homo sapiens GN=RAN PE=1 SV=3;>tr|B5MDF5|B5MDF5_HUMAN GTP-binding nuclear protein Ran OS=Homo sapiens GN=RAN PE=4 SV=1;>tr|F5H018|F5H018_HUMAN GTP-binding nuclear protein Ran (Fragment) OS=Homo sapien	4	14	14	1	50.9	50.9	5.1	24.423	216	216;233;199;128	0.96086	1.0904	1.146	1.0562	1.0878	1.1721	1.0351	1.1383	1.1754	1.145	1.1511	1.1946	1.1583	1.2343	1.3134	1.1359	1.128	1.2016	0.96726	1.0725	1.2562	0.95549	1.2938	1.0527	0.90371	1.158	1.0961	1.1872	1.1909	1.0039	1.2879	1.2225
B5MDU6;Q9H6V9;Q9H6V9-2;B5MCU4;C9JHU6;B5MCE2;C9JUM0;B4DRG3;B7ZA47;B7ZAJ5	B5MDU6;Q9H6V9;Q9H6V9-2;B5MCU4	3;2;2;2;1;1;1;1;1;1	3;2;2;2;1;1;1;1;1;1	3;2;2;2;1;1;1;1;1;1	UPF0554 protein C2orf43	C2orf43	>tr|B5MDU6|B5MDU6_HUMAN UPF0554 protein C2orf43 OS=Homo sapiens GN=C2orf43 PE=2 SV=1;>sp|Q9H6V9|CB043_HUMAN UPF0554 protein C2orf43 OS=Homo sapiens GN=C2orf43 PE=1 SV=1;>sp|Q9H6V9-2|CB043_HUMAN Isoform 2 of UPF0554 protein C2orf43 OS=Homo sapiens GN=C2orf4	10	3	3	3	9.5	9.5	9.5	42.668	370	370;325;331;240;130;146;159;166;195;277	NaN	NaN	NaN	NaN	NaN	NaN	NaN	NaN	NaN	NaN	NaN	NaN	NaN	NaN	NaN	NaN	NaN	NaN	NaN	NaN	NaN	NaN	NaN	NaN	NaN	NaN	NaN	NaN	NaN	NaN	0.97503	NaN
Q9P0V9;E7EW69;Q9P0V9-2;B5ME97;E7EX04;Q9P0V9-3;B7Z371;B7Z277;C9JEW2;C9JNR7;F5GYV2;F5H1W3;F8WC85;C9JEQ7;F5H1F2	Q9P0V9;E7EW69;Q9P0V9-2;B5ME97;E7EX04;Q9P0V9-3;B7Z371	16;16;16;16;14;12;9;6;3;3;1;1;1;1;1	16;16;16;16;14;12;9;6;3;3;1;1;1;1;1	15;15;15;15;13;11;8;5;3;3;1;1;1;1;1	Septin-10	2010-09-01	>sp|Q9P0V9|SEP10_HUMAN Septin-10 OS=Homo sapiens GN=SEPT10 PE=1 SV=2;>tr|E7EW69|E7EW69_HUMAN Septin-10 OS=Homo sapiens GN=SEPT10 PE=2 SV=1;>sp|Q9P0V9-2|SEP10_HUMAN Isoform 2 of Septin-10 OS=Homo sapiens GN=SEPT10;>tr|B5ME97|B5ME97_HUMAN Septin 10, isoform	15	16	16	15	43.6	43.6	39.4	52.592	454	454;450;503;544;473;431;321;283;58;61;26;38;48;97;98	1.0226	1.2682	1.1487	1.2187	1.3356	1.3235	1.4106	1.2127	1.1995	1.3131	0.93189	1.0494	1.1264	1.3163	1.1501	0.94545	1.1198	1.2398	1.3229	1.4535	1.6989	1.3204	1.5766	1.4425	1.1726	1.3558	1.3782	1.5785	1.3043	1.2616	1.4428	1.4297
Q9HCG8;B7WP74;B7WP27	Q9HCG8;B7WP74;B7WP27	5;5;5	5;5;5	5;5;5	Pre-mRNA-splicing factor CWC22 homolog	CWC22	>sp|Q9HCG8|CWC22_HUMAN Pre-mRNA-splicing factor CWC22 homolog OS=Homo sapiens GN=CWC22 PE=1 SV=3;>tr|B7WP74|B7WP74_HUMAN Pre-mRNA-splicing factor CWC22 homolog (Fragment) OS=Homo sapiens GN=CWC22 PE=2 SV=1;>tr|B7WP27|B7WP27_HUMAN Pre-mRNA-splicing factor C	3	5	5	5	4.1	4.1	4.1	105.47	908	908;745;908	NaN	NaN	NaN	NaN	NaN	NaN	NaN	NaN	NaN	NaN	NaN	NaN	NaN	NaN	NaN	NaN	NaN	NaN	NaN	NaN	NaN	NaN	NaN	NaN	NaN	NaN	NaN	NaN	NaN	NaN	NaN	NaN
P78310;P78310-2;B7WPI3;D3YHP0;P78310-5;P78310-4;P78310-3	P78310;P78310-2;B7WPI3;D3YHP0;P78310-5	7;7;7;6;5;3;1	7;7;7;6;5;3;1	7;7;7;6;5;3;1	Coxsackievirus and adenovirus receptor	CXADR	>sp|P78310|CXAR_HUMAN Coxsackievirus and adenovirus receptor OS=Homo sapiens GN=CXADR PE=1 SV=1;>sp|P78310-2|CXAR_HUMAN Isoform 2 of Coxsackievirus and adenovirus receptor OS=Homo sapiens GN=CXADR;>tr|B7WPI3|B7WPI3_HUMAN Coxsackievirus and adenovirus recep	7	7	7	7	23.8	23.8	23.8	40.029	365	365;344;352;324;252;200;89	NaN	NaN	NaN	NaN	NaN	NaN	NaN	NaN	NaN	NaN	NaN	NaN	NaN	NaN	NaN	NaN	NaN	NaN	NaN	NaN	NaN	NaN	NaN	NaN	NaN	NaN	NaN	NaN	NaN	NaN	NaN	NaN
Q03426;B7Z1C2;F5H8H2	Q03426;B7Z1C2;F5H8H2	2;2;2	2;2;2	2;2;2	Mevalonate kinase	MVK	>sp|Q03426|KIME_HUMAN Mevalonate kinase OS=Homo sapiens GN=MVK PE=1 SV=1;>tr|B7Z1C2|B7Z1C2_HUMAN Mevalonate kinase OS=Homo sapiens GN=MVK PE=2 SV=1;>tr|F5H8H2|F5H8H2_HUMAN Mevalonate kinase OS=Homo sapiens GN=MVK PE=3 SV=1	3	2	2	2	12.1	12.1	12.1	42.45	396	396;202;344	NaN	NaN	NaN	NaN	NaN	NaN	NaN	NaN	NaN	NaN	NaN	NaN	NaN	NaN	NaN	NaN	NaN	NaN	NaN	NaN	NaN	NaN	NaN	NaN	NaN	NaN	NaN	NaN	NaN	NaN	NaN	NaN
Q15438;B7Z1T4;Q15438-2;Q99418;O43739;K7ENQ8;Q99418-2;O43739-2;J3KQA6;Q9UIA0;K7EKA2;K7ERV8;M0R2J0;F8W8E2;G5E9B7;B7Z2V9	Q15438;B7Z1T4;Q15438-2;Q99418;O43739;K7ENQ8;Q99418-2;O43739-2;J3KQA6	4;4;4;2;2;2;2;2;2;1;1;1;1;1;1;1	4;4;4;2;2;2;2;2;2;1;1;1;1;1;1;1	4;4;4;2;2;2;2;2;2;1;1;1;1;1;1;1	Cytohesin-1;Cytohesin-2;Cytohesin-3	CYTH1;CYTH2;CYTH3	>sp|Q15438|CYH1_HUMAN Cytohesin-1 OS=Homo sapiens GN=CYTH1 PE=1 SV=1;>tr|B7Z1T4|B7Z1T4_HUMAN Cytohesin-1 OS=Homo sapiens GN=CYTH1 PE=2 SV=1;>sp|Q15438-2|CYH1_HUMAN Isoform 2 of Cytohesin-1 OS=Homo sapiens GN=CYTH1;>sp|Q99418|CYH2_HUMAN Cytohesin-2 OS=Homo	16	4	4	4	11.1	11.1	11.1	46.412	398	398;339;397;400;400;272;399;399;400;394;104;194;214;254;292;314	NaN	NaN	NaN	NaN	NaN	NaN	NaN	NaN	NaN	NaN	NaN	NaN	NaN	NaN	NaN	NaN	NaN	NaN	NaN	NaN	NaN	NaN	NaN	NaN	NaN	NaN	NaN	NaN	NaN	NaN	NaN	1.1011
P49593;B7Z2C3;B5MCT7;A8MX49;C9JL74	P49593;B7Z2C3;B5MCT7;A8MX49	6;6;4;4;2	6;6;4;4;2	6;6;4;4;2	Protein phosphatase 1F	PPM1F	>sp|P49593|PPM1F_HUMAN Protein phosphatase 1F OS=Homo sapiens GN=PPM1F PE=1 SV=3;>tr|B7Z2C3|B7Z2C3_HUMAN Protein phosphatase 1F OS=Homo sapiens GN=PPM1F PE=2 SV=1;>tr|B5MCT7|B5MCT7_HUMAN Protein phosphatase 1F OS=Homo sapiens GN=PPM1F PE=3 SV=1;>tr|A8MX49|	5	6	6	6	18.1	18.1	18.1	49.83	454	454;350;286;361;82	0.60338	1.4883	1.6731	0.76179	1.2753	NaN	NaN	1.0445	1.3774	NaN	1.1572	NaN	1.0986	1.0056	1.5484	0.68361	NaN	NaN	NaN	NaN	1.1204	0.96397	NaN	NaN	NaN	1.0427	1.5423	1.1777	1.0487	1.0013	1.0947	NaN
P09104;B7Z2X9;F5H0C8;F5H1C3;F5H5U1;F5GWQ3;F5GZ30	P09104;B7Z2X9;F5H0C8	7;7;5;3;3;3;3	2;2;1;1;1;1;1	2;2;1;1;1;1;1	Gamma-enolase;Enolase	ENO2	>sp|P09104|ENOG_HUMAN Gamma-enolase OS=Homo sapiens GN=ENO2 PE=1 SV=3;>tr|B7Z2X9|B7Z2X9_HUMAN Enolase OS=Homo sapiens GN=ENO2 PE=2 SV=1;>tr|F5H0C8|F5H0C8_HUMAN Enolase OS=Homo sapiens GN=ENO2 PE=2 SV=1	7	7	2	2	21.7	6.2	6.2	47.268	434	434;391;315;103;107;125;152	NaN	NaN	NaN	NaN	NaN	NaN	NaN	NaN	NaN	NaN	NaN	NaN	NaN	NaN	NaN	NaN	NaN	NaN	NaN	NaN	NaN	NaN	NaN	NaN	NaN	NaN	NaN	NaN	NaN	NaN	NaN	NaN
Q14746;F5H1E5;B7Z2Y2;Q14746-2;B7Z7N2	Q14746;F5H1E5;B7Z2Y2;Q14746-2;B7Z7N2	4;4;4;4;3	4;4;4;4;3	4;4;4;4;3	Conserved oligomeric Golgi complex subunit 2	COG2	>sp|Q14746|COG2_HUMAN Conserved oligomeric Golgi complex subunit 2 OS=Homo sapiens GN=COG2 PE=1 SV=1;>tr|F5H1E5|F5H1E5_HUMAN Conserved oligomeric Golgi complex subunit 2 OS=Homo sapiens GN=COG2 PE=2 SV=1;>tr|B7Z2Y2|B7Z2Y2_HUMAN Conserved oligomeric Golgi c	5	4	4	4	6.8	6.8	6.8	83.207	738	738;622;679;737;427	NaN	NaN	NaN	NaN	NaN	NaN	NaN	NaN	NaN	NaN	NaN	NaN	NaN	NaN	NaN	NaN	NaN	NaN	NaN	NaN	NaN	NaN	NaN	NaN	NaN	1.2834	NaN	NaN	NaN	NaN	NaN	NaN
Q8NCE0;Q8NCE0-4;B7Z355;Q8NCE0-2;C9J7Z4;Q8NCE0-5;Q8NCE0-3	Q8NCE0;Q8NCE0-4;B7Z355;Q8NCE0-2;C9J7Z4;Q8NCE0-5;Q8NCE0-3	4;4;4;4;3;3;3	4;4;4;4;3;3;3	4;4;4;4;3;3;3	tRNA-splicing endonuclease subunit Sen2	TSEN2	>sp|Q8NCE0|SEN2_HUMAN tRNA-splicing endonuclease subunit Sen2 OS=Homo sapiens GN=TSEN2 PE=2 SV=2;>sp|Q8NCE0-4|SEN2_HUMAN Isoform 4 of tRNA-splicing endonuclease subunit Sen2 OS=Homo sapiens GN=TSEN2;>tr|B7Z355|B7Z355_HUMAN cDNA FLJ55685, highly similar to	7	4	4	4	14.6	14.6	14.6	53.246	465	465;406;438;448;378;402;439	NaN	NaN	NaN	NaN	NaN	NaN	NaN	NaN	NaN	NaN	NaN	NaN	NaN	NaN	NaN	NaN	NaN	NaN	1.2654	NaN	NaN	NaN	NaN	NaN	NaN	NaN	NaN	NaN	NaN	NaN	NaN	NaN
B7Z367;Q9UL40;D6RJ07;Q9UL40-2;B7Z4N4;B7Z6B6;B7Z6Q2;B7Z4J8	B7Z367;Q9UL40;D6RJ07;Q9UL40-2;B7Z4N4;B7Z6B6;B7Z6Q2;B7Z4J8	2;2;2;2;1;1;1;1	2;2;2;2;1;1;1;1	2;2;2;2;1;1;1;1	Zinc finger protein 346	ZNF346	>tr|B7Z367|B7Z367_HUMAN Zinc finger protein 346 OS=Homo sapiens GN=ZNF346 PE=2 SV=1;>sp|Q9UL40|ZN346_HUMAN Zinc finger protein 346 OS=Homo sapiens GN=ZNF346 PE=1 SV=1;>tr|D6RJ07|D6RJ07_HUMAN Zinc finger protein 346 OS=Homo sapiens GN=ZNF346 PE=2 SV=1;>sp|Q	8	2	2	2	9.2	9.2	9.2	29.267	262	262;294;310;319;118;131;135;196	NaN	NaN	NaN	NaN	NaN	NaN	NaN	NaN	NaN	NaN	NaN	NaN	NaN	NaN	NaN	NaN	NaN	NaN	NaN	NaN	NaN	NaN	NaN	NaN	NaN	NaN	NaN	NaN	NaN	NaN	NaN	NaN
P13716;B7Z3I9;P13716-2;B7ZBK6	P13716;B7Z3I9;P13716-2	6;6;5;2	6;6;5;2	6;6;5;2	Delta-aminolevulinic acid dehydratase	ALAD	>sp|P13716|HEM2_HUMAN Delta-aminolevulinic acid dehydratase OS=Homo sapiens GN=ALAD PE=1 SV=1;>tr|B7Z3I9|B7Z3I9_HUMAN Delta-aminolevulinic acid dehydratase OS=Homo sapiens GN=ALAD PE=2 SV=1;>sp|P13716-2|HEM2_HUMAN Isoform 2 of Delta-aminolevulinic acid deh	4	6	6	6	31.5	31.5	31.5	36.294	330	330;313;359;120	NaN	NaN	NaN	NaN	NaN	NaN	NaN	NaN	NaN	NaN	NaN	NaN	NaN	NaN	NaN	NaN	NaN	NaN	NaN	NaN	NaN	NaN	NaN	NaN	NaN	NaN	NaN	NaN	NaN	NaN	NaN	NaN
B7Z3P1;Q15813	B7Z3P1;Q15813	10;9	10;9	10;9	Tubulin-specific chaperone E	TBCE	>tr|B7Z3P1|B7Z3P1_HUMAN Tubulin-specific chaperone E OS=Homo sapiens GN=TBCE PE=2 SV=1;>sp|Q15813|TBCE_HUMAN Tubulin-specific chaperone E OS=Homo sapiens GN=TBCE PE=1 SV=1	2	10	10	10	23.5	23.5	23.5	64.851	578	578;527	NaN	1.1033	NaN	0.73247	NaN	1.0721	1.0061	NaN	NaN	NaN	NaN	NaN	1.1765	NaN	NaN	0.94945	NaN	NaN	1.0974	NaN	NaN	NaN	NaN	NaN	NaN	NaN	NaN	NaN	NaN	NaN	NaN	NaN
Q9ULQ1;Q9ULQ1-3;B7Z3R2;H0YIK4	Q9ULQ1;Q9ULQ1-3;B7Z3R2;H0YIK4	2;2;2;1	2;2;2;1	2;2;2;1	Two pore calcium channel protein 1	TPCN1	>sp|Q9ULQ1|TPC1_HUMAN Two pore calcium channel protein 1 OS=Homo sapiens GN=TPCN1 PE=1 SV=3;>sp|Q9ULQ1-3|TPC1_HUMAN Isoform 3 of Two pore calcium channel protein 1 OS=Homo sapiens GN=TPCN1;>tr|B7Z3R2|B7Z3R2_HUMAN Two pore calcium channel protein 1 OS=Homo	4	2	2	2	3.9	3.9	3.9	94.146	816	816;888;748;204	NaN	NaN	NaN	NaN	NaN	NaN	NaN	NaN	NaN	NaN	NaN	NaN	NaN	NaN	NaN	NaN	NaN	NaN	NaN	NaN	NaN	NaN	NaN	NaN	NaN	NaN	NaN	NaN	NaN	NaN	NaN	NaN
P20810;P20810-5;P20810-4;E9PCH5;P20810-8;B7Z574;P20810-2;G5E9D3;B7Z468;E7ESM9;P20810-7;P20810-6;P20810-3;E7ES10;E9PDE4;E7EVY3;H0Y7F0;H0Y9H6;E7EQ12;E7EQA0;H0YD33;F8W7E0;D6RC54;H0YA91;D6RAA8;H0Y944;E9PSG1;E7EQK6	P20810;P20810-5;P20810-4;E9PCH5;P20810-8;B7Z574;P20810-2;G5E9D3;B7Z468;E7ESM9;P20810-7;P20810-6;P20810-3;E7ES10;E9PDE4;E7EVY3;H0Y7F0;H0Y9H6;E7EQ12;E7EQA0;H0YD33	22;22;22;22;22;22;22;22;22;22;22;22;21;21;20;20;19;18;17;16;14;7;3;3;2;2;2;1	22;22;22;22;22;22;22;22;22;22;22;22;21;21;20;20;19;18;17;16;14;7;3;3;2;2;2;1	22;22;22;22;22;22;22;22;22;22;22;22;21;21;20;20;19;18;17;16;14;7;3;3;2;2;2;1	Calpastatin	CAST	>sp|P20810|ICAL_HUMAN Calpastatin OS=Homo sapiens GN=CAST PE=1 SV=4;>sp|P20810-5|ICAL_HUMAN Isoform 5 of Calpastatin OS=Homo sapiens GN=CAST;>sp|P20810-4|ICAL_HUMAN Isoform 4 of Calpastatin OS=Homo sapiens GN=CAST;>tr|E9PCH5|E9PCH5_HUMAN Calpastatin OS=Hom	28	22	22	22	40.3	40.3	40.3	76.572	708	708;756;667;673;686;694;695;750;754;769;772;791;590;642;636;693;436;465;423;431;450;393;91;301;78;288;304;156	0.92651	1.362	1.195	1.1271	1.2775	1.3463	1.1734	1.174	1.2298	1.2227	1.1616	1.1766	1.2044	1.3129	1.4659	1.1307	1.2193	1.4999	1.0082	1.5622	1.4941	1.2371	1.4475	1.4841	0.99836	1.2914	1.4035	1.3355	1.4002	1.2024	1.3306	1.4971
O00115;B7Z4K6;K7ENE5	O00115;B7Z4K6;K7ENE5	6;6;3	6;6;3	6;6;3	Deoxyribonuclease-2-alpha	DNASE2	>sp|O00115|DNS2A_HUMAN Deoxyribonuclease-2-alpha OS=Homo sapiens GN=DNASE2 PE=1 SV=2;>tr|B7Z4K6|B7Z4K6_HUMAN Deoxyribonuclease-2-alpha OS=Homo sapiens GN=DNASE2 PE=2 SV=1;>tr|K7ENE5|K7ENE5_HUMAN Deoxyribonuclease-2-alpha (Fragment) OS=Homo sapiens GN=DNASE	3	6	6	6	16.9	16.9	16.9	39.58	360	360;305;218	0.95383	0.99722	NaN	0.94424	1.0569	1.02	1.0284	0.91941	1.016	0.92388	0.89723	0.93377	0.94757	0.98892	1.1437	0.88934	NaN	0.8759	0.98764	1.0192	0.99662	0.87713	1.0332	1.0625	0.75844	0.99357	1.0461	0.96749	1.0229	1.0097	1.0329	0.98874
O75554;B7Z4M2	O75554;B7Z4M2	3;3	3;3	3;3	WW domain-binding protein 4	WBP4	>sp|O75554|WBP4_HUMAN WW domain-binding protein 4 OS=Homo sapiens GN=WBP4 PE=1 SV=1;>tr|B7Z4M2|B7Z4M2_HUMAN WW domain-binding protein 4 OS=Homo sapiens GN=WBP4 PE=2 SV=1	2	3	3	3	7.7	7.7	7.7	42.506	376	376;355	NaN	NaN	NaN	NaN	NaN	NaN	NaN	NaN	NaN	NaN	NaN	NaN	NaN	NaN	NaN	NaN	NaN	NaN	NaN	NaN	NaN	NaN	NaN	NaN	NaN	NaN	NaN	NaN	NaN	NaN	NaN	NaN
B7Z4Q3	B7Z4Q3	16	1	0	UPF0562 protein C7orf55	C7orf55	>tr|B7Z4Q3|B7Z4Q3_HUMAN Putative RNA-binding protein Luc7-like 2 OS=Homo sapiens GN=LUC7L2 PE=2 SV=1	1	16	1	0	38	2.4	0	54.223	458	458	NaN	NaN	NaN	NaN	NaN	NaN	NaN	NaN	NaN	NaN	NaN	NaN	NaN	NaN	NaN	NaN	NaN	NaN	NaN	NaN	NaN	NaN	NaN	NaN	NaN	NaN	NaN	NaN	NaN	NaN	NaN	NaN
Q9BT40;C9JZB0;B7Z4V9;Q9BT40-2	Q9BT40;C9JZB0;B7Z4V9;Q9BT40-2	1;1;1;1	1;1;1;1	1;1;1;1	Inositol polyphosphate 5-phosphatase K	INPP5K	>sp|Q9BT40|INP5K_HUMAN Inositol polyphosphate 5-phosphatase K OS=Homo sapiens GN=INPP5K PE=1 SV=3;>tr|C9JZB0|C9JZB0_HUMAN Inositol polyphosphate 5-phosphatase K (Fragment) OS=Homo sapiens GN=INPP5K PE=2 SV=1;>tr|B7Z4V9|B7Z4V9_HUMAN Inositol polyphosphate 5	4	1	1	1	2.2	2.2	2.2	51.09	448	448;229;356;372	NaN	NaN	NaN	NaN	NaN	NaN	NaN	NaN	NaN	NaN	NaN	NaN	NaN	NaN	NaN	NaN	NaN	NaN	NaN	NaN	NaN	NaN	NaN	NaN	NaN	NaN	NaN	NaN	NaN	NaN	NaN	NaN
Q16773;Q16773-2;B7Z4W5;Q5T278;Q16773-3;Q5T277;Q5T276	Q16773;Q16773-2;B7Z4W5	8;8;8;3;2;1;1	8;8;8;3;2;1;1	8;8;8;3;2;1;1	Kynurenine--oxoglutarate transaminase 1	CCBL1	>sp|Q16773|KAT1_HUMAN Kynurenine--oxoglutarate transaminase 1 OS=Homo sapiens GN=CCBL1 PE=1 SV=1;>sp|Q16773-2|KAT1_HUMAN Isoform 2 of Kynurenine--oxoglutarate transaminase 1 OS=Homo sapiens GN=CCBL1;>tr|B7Z4W5|B7Z4W5_HUMAN Cysteine conjugate-beta lyase; cy	7	8	8	8	28	28	28	47.875	422	422;372;516;251;250;159;184	NaN	NaN	NaN	NaN	NaN	0.64438	NaN	0.6528	NaN	NaN	NaN	NaN	NaN	NaN	NaN	NaN	0.94208	NaN	0.93295	NaN	NaN	0.73223	NaN	1.103	NaN	NaN	NaN	NaN	NaN	NaN	NaN	0.94417
P48067-3;P48067;B7Z589;P48067-2	P48067-3;P48067;B7Z589;P48067-2	1;1;1;1	1;1;1;1	1;1;1;1	Sodium- and chloride-dependent glycine transporter 1;Transporter	SLC6A9	>sp|P48067-3|SC6A9_HUMAN Isoform GlyT-1B of Sodium- and chloride-dependent glycine transporter 1 OS=Homo sapiens GN=SLC6A9;>sp|P48067|SC6A9_HUMAN Sodium- and chloride-dependent glycine transporter 1 OS=Homo sapiens GN=SLC6A9 PE=2 SV=3;>tr|B7Z589|B7Z589_HUM	4	1	1	1	1.5	1.5	1.5	72.481	652	652;706;522;633	NaN	NaN	NaN	NaN	NaN	NaN	NaN	NaN	NaN	NaN	NaN	NaN	NaN	NaN	NaN	NaN	NaN	NaN	NaN	NaN	NaN	NaN	NaN	NaN	NaN	NaN	NaN	NaN	NaN	NaN	NaN	NaN
Q9Y624;B7Z5W1;B7Z941	Q9Y624;B7Z5W1;B7Z941	6;6;3	6;6;3	6;6;3	Junctional adhesion molecule A	F11R	>sp|Q9Y624|JAM1_HUMAN Junctional adhesion molecule A OS=Homo sapiens GN=F11R PE=1 SV=1;>tr|B7Z5W1|B7Z5W1_HUMAN Junctional adhesion molecule A OS=Homo sapiens GN=F11R PE=2 SV=1;>tr|B7Z941|B7Z941_HUMAN Junctional adhesion molecule A OS=Homo sapiens GN=F11R P	3	6	6	6	33.8	33.8	33.8	32.583	299	299;303;250	NaN	NaN	NaN	NaN	NaN	NaN	NaN	NaN	NaN	NaN	NaN	NaN	NaN	NaN	NaN	NaN	NaN	NaN	NaN	NaN	NaN	NaN	NaN	NaN	0.55887	0.99419	NaN	NaN	NaN	NaN	NaN	0.5898
Q9UKU7;B7Z7F1;B7Z5W4;Q6ZWP6	Q9UKU7;B7Z7F1;B7Z5W4;Q6ZWP6	2;2;2;1	2;2;2;1	2;2;2;1	Isobutyryl-CoA dehydrogenase, mitochondrial	ACAD8	>sp|Q9UKU7|ACAD8_HUMAN Isobutyryl-CoA dehydrogenase, mitochondrial OS=Homo sapiens GN=ACAD8 PE=1 SV=1;>tr|B7Z7F1|B7Z7F1_HUMAN Isobutyryl-CoA dehydrogenase, mitochondrial OS=Homo sapiens GN=ACAD8 PE=2 SV=1;>tr|B7Z5W4|B7Z5W4_HUMAN Isobutyryl-CoA dehydrogenas	4	2	2	2	8.9	8.9	8.9	45.069	415	415;226;357;288	NaN	NaN	NaN	NaN	NaN	NaN	NaN	NaN	NaN	NaN	NaN	NaN	NaN	NaN	NaN	NaN	NaN	NaN	NaN	NaN	NaN	NaN	NaN	NaN	NaN	NaN	NaN	NaN	NaN	NaN	NaN	NaN
P62070;B7Z5Z2;E9PK85;P62070-3;P62070-2;E9PQ87;E9PQK5;E9PQC5	P62070;B7Z5Z2;E9PK85;P62070-3;P62070-2	7;7;6;6;5;2;1;1	7;7;6;6;5;2;1;1	5;5;5;5;5;2;0;0	Ras-related protein R-Ras2	RRAS2	>sp|P62070|RRAS2_HUMAN Ras-related protein R-Ras2 OS=Homo sapiens GN=RRAS2 PE=1 SV=1;>tr|B7Z5Z2|B7Z5Z2_HUMAN Ras-related protein R-Ras2 OS=Homo sapiens GN=RRAS2 PE=2 SV=1;>tr|E9PK85|E9PK85_HUMAN Ras-related protein R-Ras2 (Fragment) OS=Homo sapiens GN=RRAS	8	7	7	5	39.7	39.7	26.5	23.399	204	204;210;166;169;127;69;47;52	1.0587	0.74684	NaN	0.98016	1.0541	NaN	0.8391	NaN	1.0888	1.0005	1.0371	0.83828	0.87833	0.97195	0.69077	1.03	0.81183	1.1322	0.95947	0.9277	0.86595	0.89067	1.0597	NaN	NaN	NaN	NaN	1.1127	0.76385	NaN	0.8508	0.9436
Q12979;B7Z683;Q12979-4;Q12979-2;I3L379;I3L1U8;I3L2P5;I3L434;I3NI05;H0Y554;Q12979-3	Q12979;B7Z683;Q12979-4;Q12979-2	3;3;3;3;1;1;1;1;1;1;1	3;3;3;3;1;1;1;1;1;1;1	2;2;2;2;1;0;0;1;1;0;1	Active breakpoint cluster region-related protein	ABR	>sp|Q12979|ABR_HUMAN Active breakpoint cluster region-related protein OS=Homo sapiens GN=ABR PE=2 SV=2;>tr|B7Z683|B7Z683_HUMAN Active breakpoint cluster region-related protein OS=Homo sapiens GN=ABR PE=2 SV=1;>sp|Q12979-4|ABR_HUMAN Isoform 4 of Active brea	11	3	3	2	3.7	3.7	2.6	97.597	859	859;641;813;822;117;165;168;177;191;257;310	NaN	NaN	NaN	NaN	NaN	NaN	NaN	NaN	NaN	NaN	NaN	NaN	NaN	NaN	NaN	NaN	NaN	NaN	NaN	NaN	1.114	NaN	NaN	NaN	NaN	NaN	NaN	NaN	NaN	NaN	NaN	NaN
Q16698;B7Z6B8;E5RJD2;E5RJG7;E5RFV2;E5RID6;H0YAW3	Q16698;B7Z6B8;E5RJD2;E5RJG7;E5RFV2	10;10;5;5;5;2;1	10;10;5;5;5;2;1	10;10;5;5;5;2;1	2,4-dienoyl-CoA reductase, mitochondrial	DECR1	>sp|Q16698|DECR_HUMAN 2,4-dienoyl-CoA reductase, mitochondrial OS=Homo sapiens GN=DECR1 PE=1 SV=1;>tr|B7Z6B8|B7Z6B8_HUMAN 2,4-dienoyl-CoA reductase, mitochondrial OS=Homo sapiens GN=DECR1 PE=2 SV=1;>tr|E5RJD2|E5RJD2_HUMAN 2,4-dienoyl-CoA reductase, mitocho	7	10	10	10	33.4	33.4	33.4	36.067	335	335;326;151;181;205;95;43	0.91691	NaN	1.7535	1.0192	NaN	NaN	1.3114	NaN	NaN	NaN	NaN	NaN	1.4288	NaN	NaN	NaN	0.95731	0.98024	2.9138	1.0557	1.6611	1.2791	1.1149	1.0928	1.1133	1.3655	1.4653	1.4981	0.97036	1.5403	1.0768	1.3464
Q96B97;B7Z6E8;Q96B97-3;Q96B97-2;Q5JPT2;Q5VSN0	Q96B97;B7Z6E8;Q96B97-3;Q96B97-2;Q5JPT2	9;9;9;9;9;3	9;9;9;9;9;3	9;9;9;9;9;3	SH3 domain-containing kinase-binding protein 1	SH3KBP1	>sp|Q96B97|SH3K1_HUMAN SH3 domain-containing kinase-binding protein 1 OS=Homo sapiens GN=SH3KBP1 PE=1 SV=2;>tr|B7Z6E8|B7Z6E8_HUMAN SH3 domain-containing kinase-binding protein 1 OS=Homo sapiens GN=SH3KBP1 PE=2 SV=1;>sp|Q96B97-3|SH3K1_HUMAN Isoform 3 of SH3	6	9	9	9	16.4	16.4	16.4	73.125	665	665;404;427;628;645;553	NaN	1.0532	NaN	NaN	NaN	NaN	NaN	NaN	NaN	NaN	NaN	1.1781	NaN	NaN	NaN	1.4563	NaN	NaN	1.0233	NaN	NaN	NaN	NaN	0.98735	NaN	NaN	NaN	NaN	NaN	NaN	1.2396	NaN
O95379-2;O95379-3;O95379;D6RCM8;B7Z713	O95379-2;O95379-3;O95379;D6RCM8;B7Z713	3;3;3;3;3	3;3;3;3;3	3;3;3;3;3	Tumor necrosis factor alpha-induced protein 8	TNFAIP8	>sp|O95379-2|TFIP8_HUMAN Isoform 2 of Tumor necrosis factor alpha-induced protein 8 OS=Homo sapiens GN=TNFAIP8;>sp|O95379-3|TFIP8_HUMAN Isoform 3 of Tumor necrosis factor alpha-induced protein 8 OS=Homo sapiens GN=TNFAIP8;>sp|O95379|TFIP8_HUMAN Tumor necro	5	3	3	3	27.9	27.9	27.9	22.047	190	190;188;198;200;210	NaN	NaN	NaN	NaN	NaN	NaN	NaN	NaN	NaN	NaN	NaN	NaN	NaN	NaN	NaN	NaN	NaN	NaN	NaN	NaN	NaN	NaN	1.3124	NaN	1.0099	NaN	1.1235	NaN	NaN	0.91024	NaN	NaN
Q9H6Z4;Q9H6Z4-2;Q9H6Z4-3;B7Z7F3;F5H4C2;K7EIJ4;K7ESQ0;K7EN31;K7EJV3;K7EMH9;K7ENJ2;K7EID7;K7ENB9;K7EPW1	Q9H6Z4;Q9H6Z4-2;Q9H6Z4-3;B7Z7F3;F5H4C2;K7EIJ4	12;12;12;12;11;6;2;2;2;1;1;1;1;1	12;12;12;12;11;6;2;2;2;1;1;1;1;1	12;12;12;12;11;6;2;2;2;1;1;1;1;1	Ran-binding protein 3	RANBP3	>sp|Q9H6Z4|RANB3_HUMAN Ran-binding protein 3 OS=Homo sapiens GN=RANBP3 PE=1 SV=1;>sp|Q9H6Z4-2|RANB3_HUMAN Isoform 2 of Ran-binding protein 3 OS=Homo sapiens GN=RANBP3;>sp|Q9H6Z4-3|RANB3_HUMAN Isoform 3 of Ran-binding protein 3 OS=Homo sapiens GN=RANBP3;>tr	14	12	12	12	27.5	27.5	27.5	60.209	567	567;562;499;494;439;155;122;172;174;51;62;73;74;108	NaN	1.1755	1.1071	0.96516	1.2347	1.0717	1.063	1.0967	1.148	0.9884	1.0866	1.0274	1.0459	1.0579	1.07	0.96682	0.94991	1.0209	0.95697	1.1548	1.1467	0.94643	1.0377	1.0121	NaN	1.1276	0.95989	1.0284	1.0849	0.99603	0.9671	NaN
P48739;P48739-2;B7Z7Q0;B3KYB6;B3KYB7	P48739;P48739-2;B7Z7Q0;B3KYB6;B3KYB7	20;20;20;11;11	20;20;20;11;11	18;18;18;9;10	Phosphatidylinositol transfer protein beta isoform	PITPNB	>sp|P48739|PIPNB_HUMAN Phosphatidylinositol transfer protein beta isoform OS=Homo sapiens GN=PITPNB PE=1 SV=2;>sp|P48739-2|PIPNB_HUMAN Isoform 2 of Phosphatidylinositol transfer protein beta isoform OS=Homo sapiens GN=PITPNB;>tr|B7Z7Q0|B7Z7Q0_HUMAN Phospha	5	20	20	18	68.3	68.3	64.9	31.54	271	271;272;273;120;168	1.0089	1.1297	1.1621	1.123	1.1341	1.1695	1.133	1.1473	1.1631	1.1945	1.0154	1.1669	1.1144	1.2149	1.2461	1.1104	1.0795	1.2091	0.91885	1.246	1.3174	1.3406	1.2335	1.2784	1.058	1.1128	1.3785	1.255	1.2668	1.2603	1.3001	1.3728
Q8NHH9;B7Z7X8;Q8NHH9-4;Q8NHH9-2;Q8NHH9-3;B5MCN0;C9JQQ5;H7C3A2;C9JC25	Q8NHH9;B7Z7X8;Q8NHH9-4;Q8NHH9-2;Q8NHH9-3;B5MCN0;C9JQQ5;H7C3A2	8;8;8;8;7;7;5;4;1	8;8;8;8;7;7;5;4;1	8;8;8;8;7;7;5;4;1	Atlastin-2	ATL2	>sp|Q8NHH9|ATLA2_HUMAN Atlastin-2 OS=Homo sapiens GN=ATL2 PE=1 SV=2;>tr|B7Z7X8|B7Z7X8_HUMAN Atlastin-2 OS=Homo sapiens GN=ATL2 PE=2 SV=1;>sp|Q8NHH9-4|ATLA2_HUMAN Isoform 4 of Atlastin-2 OS=Homo sapiens GN=ATL2;>sp|Q8NHH9-2|ATLA2_HUMAN Isoform 2 of Atlastin	9	8	8	8	18	18	18	66.228	583	583;565;566;579;412;413;175;258;186	NaN	NaN	NaN	NaN	NaN	NaN	NaN	NaN	NaN	NaN	NaN	NaN	NaN	NaN	NaN	NaN	NaN	NaN	NaN	NaN	NaN	NaN	NaN	NaN	NaN	NaN	NaN	NaN	NaN	NaN	NaN	NaN
Q93009;B7Z815;F5H8E5;H3BND8;F5H2X1;H3BUV0;H3BTM1;H3BRA2;H3BQD1;I3L2D8	Q93009;B7Z815;F5H8E5;H3BND8	46;46;45;40;18;3;3;3;3;1	46;46;45;40;18;3;3;3;3;1	46;46;45;40;18;3;3;3;3;1	Ubiquitin carboxyl-terminal hydrolase 7;Ubiquitin carboxyl-terminal hydrolase	USP7	>sp|Q93009|UBP7_HUMAN Ubiquitin carboxyl-terminal hydrolase 7 OS=Homo sapiens GN=USP7 PE=1 SV=2;>tr|B7Z815|B7Z815_HUMAN Ubiquitin carboxyl-terminal hydrolase OS=Homo sapiens GN=USP7 PE=2 SV=1;>tr|F5H8E5|F5H8E5_HUMAN Ubiquitin carboxyl-terminal hydrolase OS	10	46	46	46	50.5	50.5	50.5	128.3	1102	1102;1086;1003;909;509;109;118;130;159;68	0.95817	1.0653	1.1274	1.0669	1.0386	1.0427	1.128	0.92174	1.0814	1.0611	1.0763	1.0538	0.97737	1.0521	1.1725	1.0576	1.0432	1.1779	1.08	1.1462	1.021	1.0395	1.1606	1.1475	1.0164	1.083	1.1139	1.1989	1.1033	1.08	1.226	1.2186
Q15392;B7Z817	Q15392;B7Z817	11;11	11;11	5;5	Delta(24)-sterol reductase	DHCR24	>sp|Q15392|DHC24_HUMAN Delta(24)-sterol reductase OS=Homo sapiens GN=DHCR24 PE=1 SV=2;>tr|B7Z817|B7Z817_HUMAN Delta(24)-sterol reductase OS=Homo sapiens GN=DHCR24 PE=2 SV=1	2	11	11	5	26.9	26.9	8.1	60.101	516	516;475	0.94936	1.181	0.94615	1.2454	1.0485	0.93436	1.0932	0.95414	1.2341	1.3343	1.0482	1.1188	1.0634	1.1565	0.75987	1.2675	0.78382	0.94635	0.94271	1.1158	0.87288	1.0797	1.0168	1.1528	0.82018	1.1542	0.90061	1.2956	1.0587	1.1999	1.0168	1.0982
P11169;Q8TDB8;B7Z844;Q8TDB8-2;B7ZAC3	P11169;Q8TDB8;B7Z844;Q8TDB8-2;B7ZAC3	3;3;3;3;3	3;3;3;3;3	3;3;3;3;3	Solute carrier family 2, facilitated glucose transporter member 3;Solute carrier family 2, facilitated glucose transporter member 14	SLC2A3;SLC2A14	>sp|P11169|GTR3_HUMAN Solute carrier family 2, facilitated glucose transporter member 3 OS=Homo sapiens GN=SLC2A3 PE=1 SV=1;>sp|Q8TDB8|GTR14_HUMAN Solute carrier family 2, facilitated glucose transporter member 14 OS=Homo sapiens GN=SLC2A14 PE=2 SV=1;>tr|B	5	3	3	3	5.8	5.8	5.8	53.924	496	496;520;411;497;535	NaN	NaN	NaN	NaN	NaN	NaN	0.82075	0.5851	NaN	NaN	NaN	NaN	NaN	NaN	NaN	NaN	NaN	NaN	NaN	NaN	NaN	NaN	NaN	NaN	NaN	NaN	NaN	NaN	NaN	NaN	NaN	NaN
P48382;B7Z848;F8W689;H0Y4B4	P48382;B7Z848;F8W689;H0Y4B4	2;2;2;1	2;2;2;1	2;2;2;1	DNA-binding protein RFX5	RFX5	>sp|P48382|RFX5_HUMAN DNA-binding protein RFX5 OS=Homo sapiens GN=RFX5 PE=1 SV=1;>tr|B7Z848|B7Z848_HUMAN DNA-binding protein RFX5 OS=Homo sapiens GN=RFX5 PE=2 SV=1;>tr|F8W689|F8W689_HUMAN DNA-binding protein RFX5 (Fragment) OS=Homo sapiens GN=RFX5 PE=2 SV=	4	2	2	2	4.2	4.2	4.2	65.322	616	616;576;596;235	NaN	NaN	NaN	NaN	NaN	NaN	NaN	NaN	NaN	NaN	NaN	NaN	NaN	NaN	NaN	NaN	NaN	NaN	NaN	NaN	NaN	NaN	NaN	NaN	NaN	NaN	NaN	NaN	NaN	NaN	NaN	NaN
Q9UPN6;B7Z888	Q9UPN6;B7Z888	4;4	3;3	3;3	Protein SCAF8	SCAF8	>sp|Q9UPN6|SCAF8_HUMAN Protein SCAF8 OS=Homo sapiens GN=SCAF8 PE=1 SV=1;>tr|B7Z888|B7Z888_HUMAN Protein SCAF8 OS=Homo sapiens GN=SCAF8 PE=2 SV=1	2	4	3	3	5.4	4.9	4.9	140.52	1271	1271;1337	NaN	NaN	NaN	NaN	NaN	NaN	NaN	NaN	NaN	NaN	NaN	NaN	NaN	NaN	NaN	NaN	NaN	NaN	NaN	NaN	NaN	NaN	NaN	NaN	NaN	1.1824	NaN	NaN	NaN	NaN	NaN	NaN
Q5VW32;B7Z9G5;F5GXQ0;Q5VW33	Q5VW32;B7Z9G5;F5GXQ0	8;8;6;3	8;8;6;3	8;8;6;3	BRO1 domain-containing protein BROX	BROX;C1orf58	>sp|Q5VW32|BROX_HUMAN BRO1 domain-containing protein BROX OS=Homo sapiens GN=BROX PE=1 SV=1;>tr|B7Z9G5|B7Z9G5_HUMAN BRO1 domain-containing protein BROX OS=Homo sapiens GN=C1orf58 PE=2 SV=1;>tr|F5GXQ0|F5GXQ0_HUMAN BRO1 domain-containing protein BROX OS=Homo	4	8	8	8	27.3	27.3	27.3	46.476	411	411;379;338;215	1.1207	1.0156	NaN	NaN	NaN	1.6518	1.056	1.3975	NaN	1.4784	1.6586	1.1942	0.72024	1.1281	NaN	1.3492	0.98449	0.92858	0.9898	1.4019	1.131	0.78913	0.89704	1.027	0.78363	1.1151	1.1712	1.0085	1.1173	1.0574	1.0305	1.0973
B7Z9I1;P11310;P11310-2;Q5T4U5;B4DJE7;E9PJM9;H0YDT5;E9PRX4	B7Z9I1;P11310;P11310-2;Q5T4U5;B4DJE7	19;18;18;18;13;3;2;2	19;18;18;18;13;3;2;2	19;18;18;18;13;3;2;2	Medium-chain specific acyl-CoA dehydrogenase, mitochondrial	ACADM	>tr|B7Z9I1|B7Z9I1_HUMAN Medium-chain-specific acyl-CoA dehydrogenase, mitochondrial OS=Homo sapiens GN=ACADM PE=2 SV=1;>sp|P11310|ACADM_HUMAN Medium-chain specific acyl-CoA dehydrogenase, mitochondrial OS=Homo sapiens GN=ACADM PE=1 SV=1;>sp|P11310-2|ACADM_	8	19	19	19	52.7	52.7	52.7	42.426	385	385;421;425;454;232;104;67;76	0.92985	0.96032	1.5986	1.1362	1.1242	0.89488	1.0644	0.86795	1.1226	1.1403	0.9421	0.88171	1.1181	0.94433	0.76033	1.1603	0.94232	1.2511	1.0334	1.0933	1.054	1.0792	1.0086	0.97239	0.93576	1.0593	1.1301	1.1155	0.98012	1.0391	0.97901	1.0351
O75787;B7Z9I3;H0Y750;H7C3E1;B7Z1I9;B7Z413;H7C240	O75787;B7Z9I3;H0Y750;H7C3E1;B7Z1I9;B7Z413;H7C240	7;7;5;5;5;5;4	7;7;5;5;5;5;4	7;7;5;5;5;5;4	Renin receptor	ATP6AP2	>sp|O75787|RENR_HUMAN Renin receptor OS=Homo sapiens GN=ATP6AP2 PE=1 SV=2;>tr|B7Z9I3|B7Z9I3_HUMAN Renin receptor OS=Homo sapiens GN=ATP6AP2 PE=2 SV=1;>tr|H0Y750|H0Y750_HUMAN Renin receptor (Fragment) OS=Homo sapiens GN=ATP6AP2 PE=4 SV=1;>tr|H7C3E1|H7C3E1_H	7	7	7	7	28.3	28.3	28.3	39.008	350	350;318;243;259;272;274;203	NaN	1.3698	1.1006	NaN	1.2688	1.1512	NaN	1.0329	NaN	1.281	1.0929	1.0036	0.9895	1.0843	NaN	NaN	0.91269	1.3786	1.4798	1.9372	1.662	1.8753	1.406	1.2774	0.86289	1.7039	NaN	1.4808	NaN	1.4127	1.4537	1.7564
Q13409;Q13409-3;Q13409-6;B7ZA04;Q13409-2;Q13409-5;F8W8S0;E7EQL5;E7EV09;E7EQU2;E7ESD3;E7EMU4;E7ET01;E7ETL8;E9PGG1;E7EUM4;E7ERR6;E7ERH4;E7EU01	Q13409;Q13409-3;Q13409-6;B7ZA04;Q13409-2;Q13409-5;F8W8S0;E7EQL5	19;19;19;19;19;19;19;10;9;6;6;6;4;4;2;2;2;2;1	19;19;19;19;19;19;19;10;9;6;6;6;4;4;2;2;2;2;1	19;19;19;19;19;19;19;10;9;6;6;6;4;4;2;2;2;2;1	Cytoplasmic dynein 1 intermediate chain 2	DYNC1I2	>sp|Q13409|DC1I2_HUMAN Cytoplasmic dynein 1 intermediate chain 2 OS=Homo sapiens GN=DYNC1I2 PE=1 SV=3;>sp|Q13409-3|DC1I2_HUMAN Isoform 2C of Cytoplasmic dynein 1 intermediate chain 2 OS=Homo sapiens GN=DYNC1I2;>sp|Q13409-6|DC1I2_HUMAN Isoform 2F of Cytopla	19	19	19	19	49.7	49.7	49.7	71.456	638	638;612;611;630;632;637;638;305;251;185;187;214;173;184;110;137;139;151;121	0.97568	1.1428	1.1305	1.1242	1.2379	1.0906	1.0778	1.1402	1.1537	1.1535	1.099	1.2687	1.2182	1.0868	1.3591	1.2387	0.9926	1.0993	0.99914	1.3807	1.5261	1.3593	1.3921	1.3	0.92213	1.534	1.3846	1.2362	1.291	1.3149	1.622	1.4244
B7ZAQ6;E9PKY3;B7ZAQ6-2;B7ZAQ6-3;P0CG08;A6NKF9;H0YFP4	B7ZAQ6;E9PKY3;B7ZAQ6-2;B7ZAQ6-3;P0CG08;A6NKF9;H0YFP4	2;2;2;2;2;1;1	2;2;2;2;2;1;1	2;2;2;2;2;1;1	Golgi pH regulator A;Golgi pH regulator B;Putative Golgi pH regulator C	GPR89A;GPR89B;GPR89C	>sp|B7ZAQ6|GPHRA_HUMAN Golgi pH regulator A OS=Homo sapiens GN=GPR89A PE=1 SV=2;>tr|E9PKY3|E9PKY3_HUMAN Golgi pH regulator A OS=Homo sapiens GN=GPR89A PE=2 SV=1;>sp|B7ZAQ6-2|GPHRA_HUMAN Isoform 2 of Golgi pH regulator A OS=Homo sapiens GN=GPR89A;>sp|B7ZAQ6	7	2	2	2	5.3	5.3	5.3	52.916	455	455;229;335;430;455;320;122	NaN	NaN	NaN	NaN	NaN	NaN	NaN	NaN	NaN	NaN	NaN	NaN	NaN	NaN	NaN	NaN	NaN	NaN	NaN	NaN	NaN	NaN	NaN	NaN	NaN	NaN	NaN	NaN	NaN	NaN	NaN	NaN
Q99447;B7ZAS0;F5H8B1;Q99447-2;I3L1R7;I3L2Q1;I3L1L9;I3L3V9;I3L1C4;I3L1F9	Q99447;B7ZAS0;F5H8B1;Q99447-2;I3L1R7;I3L2Q1;I3L1L9;I3L3V9	10;10;10;9;9;6;6;5;2;1	10;10;10;9;9;6;6;5;2;1	10;10;10;9;9;6;6;5;2;1	Ethanolamine-phosphate cytidylyltransferase	PCYT2	>sp|Q99447|PCY2_HUMAN Ethanolamine-phosphate cytidylyltransferase OS=Homo sapiens GN=PCYT2 PE=1 SV=1;>tr|B7ZAS0|B7ZAS0_HUMAN Ethanolamine-phosphate cytidylyltransferase OS=Homo sapiens GN=PCYT2 PE=2 SV=1;>tr|F5H8B1|F5H8B1_HUMAN Ethanolamine-phosphate cytid	10	10	10	10	37.5	37.5	37.5	43.835	389	389;357;407;311;367;308;314;207;81;35	NaN	NaN	NaN	1.2415	NaN	1.2127	NaN	0.87681	NaN	NaN	NaN	1.1317	NaN	1.3654	1.5845	1.1309	NaN	NaN	0.89622	1.2697	1.2948	1.1893	1.2849	NaN	0.98225	1.1975	1.0706	1.2458	1.2075	NaN	1.2719	1.2567
Q9H9S4;B7ZBJ4;Q5TAW7	Q9H9S4;B7ZBJ4;Q5TAW7	4;4;4	1;1;1	1;1;1	Calcium-binding protein 39-like	CAB39L	>sp|Q9H9S4|CB39L_HUMAN Calcium-binding protein 39-like OS=Homo sapiens GN=CAB39L PE=1 SV=3;>tr|B7ZBJ4|B7ZBJ4_HUMAN Calcium-binding protein 39-like OS=Homo sapiens GN=CAB39L PE=2 SV=1;>tr|Q5TAW7|Q5TAW7_HUMAN Calcium-binding protein 39-like (Fragment) OS=Hom	3	4	1	1	7.7	3	3	39.087	337	337;193;280	NaN	NaN	NaN	NaN	NaN	NaN	NaN	NaN	NaN	NaN	NaN	NaN	NaN	NaN	NaN	NaN	NaN	NaN	NaN	NaN	NaN	NaN	NaN	NaN	NaN	NaN	NaN	NaN	NaN	NaN	NaN	NaN
Q7Z3K3;Q7Z3K3-5;E9PM80;Q7Z3K3-2;Q7Z3K3-3;B7ZBY5;F5H8H4;H0YCT3;H7C238;M0R2X2;Q7Z3K3-4	Q7Z3K3;Q7Z3K3-5;E9PM80;Q7Z3K3-2;Q7Z3K3-3;B7ZBY5;F5H8H4	15;15;15;15;15;15;11;4;1;1;1	15;15;15;15;15;15;11;4;1;1;1	15;15;15;15;15;15;11;4;1;1;1	Pogo transposable element with ZNF domain	POGZ	>sp|Q7Z3K3|POGZ_HUMAN Pogo transposable element with ZNF domain OS=Homo sapiens GN=POGZ PE=1 SV=2;>sp|Q7Z3K3-5|POGZ_HUMAN Isoform 5 of Pogo transposable element with ZNF domain OS=Homo sapiens GN=POGZ;>tr|E9PM80|E9PM80_HUMAN Pogo transposable element with	11	15	15	15	16.2	16.2	16.2	155.34	1410	1410;1315;1348;1357;1366;1401;772;316;60;109;363	NaN	NaN	NaN	NaN	NaN	NaN	NaN	NaN	NaN	NaN	NaN	NaN	NaN	NaN	NaN	NaN	NaN	NaN	NaN	NaN	NaN	NaN	NaN	NaN	0.71141	NaN	NaN	NaN	NaN	NaN	0.87053	NaN
Q9NR46;B7ZC38;Q9NR46-2;F8WFB9	Q9NR46;B7ZC38;Q9NR46-2	11;11;10;3	10;10;9;2	2;2;1;0	Endophilin-B2	SH3GLB2	>sp|Q9NR46|SHLB2_HUMAN Endophilin-B2 OS=Homo sapiens GN=SH3GLB2 PE=1 SV=1;>tr|B7ZC38|B7ZC38_HUMAN Endophilin-B2 OS=Homo sapiens GN=SH3GLB2 PE=2 SV=1;>sp|Q9NR46-2|SHLB2_HUMAN Isoform 2 of Endophilin-B2 OS=Homo sapiens GN=SH3GLB2	4	11	10	2	33.4	31.4	9.4	43.973	395	395;400;404;127	1.0063	1.1985	1.254	1.2398	1.0915	1.1766	1.1804	0.9645	1.2019	1.0718	1.1515	1.1283	1.0401	1.206	1.3065	0.9763	1.2747	1.1536	0.88175	1.4301	1.2663	NaN	1.7388	1.2938	0.91389	1.1045	1.4509	1.5219	NaN	1.2323	1.5546	1.8947
Q16537;B7ZKK9;J3KQN6;Q15173;Q15173-2	Q16537;B7ZKK9;J3KQN6	10;10;8;2;2	9;9;7;1;1	9;9;7;1;1	Serine/threonine-protein phosphatase 2A 56 kDa regulatory subunit epsilon isoform	PPP2R5E	>sp|Q16537|2A5E_HUMAN Serine/threonine-protein phosphatase 2A 56 kDa regulatory subunit epsilon isoform OS=Homo sapiens GN=PPP2R5E PE=1 SV=1;>tr|B7ZKK9|B7ZKK9_HUMAN PPP2R5E protein OS=Homo sapiens GN=PPP2R5E PE=2 SV=1;>tr|J3KQN6|J3KQN6_HUMAN Serine/threoni	5	10	9	9	24.2	21.6	21.6	54.699	467	467;462;391;497;494	NaN	NaN	NaN	0.82915	1.228	NaN	NaN	NaN	NaN	NaN	NaN	NaN	0.85455	NaN	NaN	NaN	NaN	NaN	NaN	NaN	NaN	NaN	NaN	NaN	NaN	NaN	NaN	NaN	NaN	NaN	NaN	1.1945
O95487;O95487-2;B7ZKM8	O95487;O95487-2;B7ZKM8	18;18;18	18;18;18	17;17;17	Protein transport protein Sec24B	SEC24B	>sp|O95487|SC24B_HUMAN Protein transport protein Sec24B OS=Homo sapiens GN=SEC24B PE=1 SV=2;>sp|O95487-2|SC24B_HUMAN Isoform 2 of Protein transport protein Sec24B OS=Homo sapiens GN=SEC24B;>tr|B7ZKM8|B7ZKM8_HUMAN Protein transport protein Sec24B OS=Homo sa	3	18	18	17	16.5	16.5	15.9	137.42	1268	1268;1233;1298	1.2754	1.2239	1.1813	1.0949	0.98706	1.2458	1.0915	1.1588	1.1378	1.0282	0.98813	0.96322	1.0906	1.2363	1.2487	1.2402	1.1346	1.0981	1.0132	1.3255	1.1471	1.3943	1.1004	1.0928	0.89243	1.0913	1.1792	1.2389	1.1171	1.0785	1.3012	1.2998
Q8WTV0-2;Q8WTV0-4;B7ZKQ9;Q8WTV0-3	Q8WTV0-2;Q8WTV0-4;B7ZKQ9;Q8WTV0-3	9;9;9;7	9;9;9;7	2;2;2;2	Scavenger receptor class B member 1	SCARB1	>sp|Q8WTV0-2|SCRB1_HUMAN Isoform 1 of Scavenger receptor class B member 1 OS=Homo sapiens GN=SCARB1;>sp|Q8WTV0-4|SCRB1_HUMAN Isoform 4 of Scavenger receptor class B member 1 OS=Homo sapiens GN=SCARB1;>tr|B7ZKQ9|B7ZKQ9_HUMAN SCARB1 protein OS=Homo sapiens G	4	9	9	2	20.2	20.2	4.9	56.973	509	509;474;481;409	NaN	0.87183	1.0455	0.87797	1.0699	0.88625	0.95992	0.93045	0.90329	1.0195	NaN	0.85034	0.77292	0.90067	NaN	0.75268	NaN	NaN	0.82703	1.2899	1.0648	1.0902	1.2094	0.89618	0.70903	1.1011	1.1663	NaN	NaN	0.93956	NaN	NaN
Q86UV5;Q86UV5-2;B7ZKS7;Q86UV5-3;Q86UV5-4;Q86UV5-7;Q86UV5-5;H3BLX5;E9PJH5;E9PJ93	Q86UV5;Q86UV5-2;B7ZKS7;Q86UV5-3;Q86UV5-4;Q86UV5-7	10;10;10;7;5;5;4;1;1;1	10;10;10;7;5;5;4;1;1;1	10;10;10;7;5;5;4;1;1;1	Ubiquitin carboxyl-terminal hydrolase 48	USP48	>sp|Q86UV5|UBP48_HUMAN Ubiquitin carboxyl-terminal hydrolase 48 OS=Homo sapiens GN=USP48 PE=1 SV=1;>sp|Q86UV5-2|UBP48_HUMAN Isoform 2 of Ubiquitin carboxyl-terminal hydrolase 48 OS=Homo sapiens GN=USP48;>tr|B7ZKS7|B7ZKS7_HUMAN USP48 protein OS=Homo sapiens	10	10	10	10	13	13	13	119.03	1035	1035;983;1047;703;392;485;521;115;135;147	1.1117	NaN	NaN	1.1168	NaN	NaN	NaN	1.1701	1.1762	NaN	NaN	NaN	NaN	NaN	1.4842	1.323	1.5418	1.3134	NaN	1.4618	1.0981	NaN	1.2915	1.2264	0.93849	1.5927	NaN	1.0735	1.3473	NaN	NaN	NaN
Q9BQS8;B7ZKT7;Q9BQS8-3;Q9BQS8-2	Q9BQS8;B7ZKT7	10;10;1;1	10;10;1;1	10;10;1;1	FYVE and coiled-coil domain-containing protein 1	FYCO1	>sp|Q9BQS8|FYCO1_HUMAN FYVE and coiled-coil domain-containing protein 1 OS=Homo sapiens GN=FYCO1 PE=1 SV=3;>tr|B7ZKT7|B7ZKT7_HUMAN FYVE and coiled-coil domain-containing protein 1 OS=Homo sapiens GN=FYCO1 PE=2 SV=1	4	10	10	10	10.2	10.2	10.2	166.98	1478	1478;1498;379;380	NaN	NaN	NaN	NaN	NaN	NaN	NaN	NaN	NaN	NaN	NaN	NaN	NaN	NaN	NaN	NaN	NaN	NaN	NaN	NaN	NaN	NaN	NaN	NaN	0.92008	NaN	NaN	NaN	NaN	NaN	NaN	NaN
Q9BZQ6;B7ZLZ2;H0Y498	Q9BZQ6;B7ZLZ2;H0Y498	5;5;3	5;5;3	5;5;3	ER degradation-enhancing alpha-mannosidase-like protein 3	EDEM3	>sp|Q9BZQ6|EDEM3_HUMAN ER degradation-enhancing alpha-mannosidase-like protein 3 OS=Homo sapiens GN=EDEM3 PE=1 SV=2;>tr|B7ZLZ2|B7ZLZ2_HUMAN ER degradation-enhancing alpha-mannosidase-like protein 3 OS=Homo sapiens GN=EDEM3 PE=2 SV=1;>tr|H0Y498|H0Y498_HUMAN	3	5	5	5	7.2	7.2	7.2	104.66	932	932;905;380	NaN	NaN	NaN	NaN	NaN	NaN	NaN	NaN	NaN	NaN	NaN	NaN	NaN	NaN	NaN	NaN	NaN	NaN	NaN	1.1646	NaN	NaN	0.89606	NaN	NaN	NaN	1.1609	1.6654	1.0232	0.89041	NaN	NaN
Q75N03;B7ZM03;C9J121;C9J2P9;F8WEM5	Q75N03;B7ZM03;C9J121;C9J2P9	4;4;3;3;1	4;4;3;3;1	4;4;3;3;1	E3 ubiquitin-protein ligase Hakai	CBLL1	>sp|Q75N03|HAKAI_HUMAN E3 ubiquitin-protein ligase Hakai OS=Homo sapiens GN=CBLL1 PE=1 SV=1;>tr|B7ZM03|B7ZM03_HUMAN CBLL1 protein OS=Homo sapiens GN=CBLL1 PE=2 SV=1;>tr|C9J121|C9J121_HUMAN E3 ubiquitin-protein ligase Hakai OS=Homo sapiens GN=CBLL1 PE=2 SV=	5	4	4	4	13.6	13.6	13.6	54.519	491	491;490;282;323;67	NaN	NaN	NaN	NaN	NaN	NaN	NaN	NaN	NaN	NaN	NaN	NaN	NaN	NaN	NaN	NaN	NaN	NaN	NaN	NaN	NaN	NaN	NaN	NaN	NaN	NaN	NaN	NaN	NaN	NaN	NaN	NaN
O95785;M0QXA7;B7ZM82;M0QY21;O95785-2	O95785;M0QXA7;B7ZM82;M0QY21;O95785-2	4;4;4;2;2	4;4;4;2;2	4;4;4;2;2	Protein Wiz	WIZ	>sp|O95785|WIZ_HUMAN Protein Wiz OS=Homo sapiens GN=WIZ PE=1 SV=2;>tr|M0QXA7|M0QXA7_HUMAN Protein Wiz OS=Homo sapiens GN=WIZ PE=4 SV=1;>tr|B7ZM82|B7ZM82_HUMAN Protein Wiz OS=Homo sapiens GN=WIZ PE=2 SV=1;>tr|M0QY21|M0QY21_HUMAN Protein Wiz (Fragment) OS=Ho	5	4	4	4	3	3	3	178.67	1651	1651;968;965;488;794	NaN	NaN	NaN	NaN	NaN	NaN	NaN	NaN	NaN	NaN	NaN	NaN	NaN	NaN	NaN	NaN	NaN	NaN	NaN	NaN	NaN	NaN	NaN	NaN	NaN	NaN	NaN	NaN	NaN	0.70339	NaN	NaN
Q6NZ67;Q6P582;B8ZZ87;H7C173;H7C202	Q6NZ67;Q6P582;B8ZZ87;H7C173;H7C202	4;4;4;3;3	4;4;4;3;3	2;2;2;1;1	Mitotic-spindle organizing protein 2B;Mitotic-spindle organizing protein 2A	MZT2B;MZT2A	>sp|Q6NZ67|MZT2B_HUMAN Mitotic-spindle organizing protein 2B OS=Homo sapiens GN=MZT2B PE=1 SV=1;>sp|Q6P582|MZT2A_HUMAN Mitotic-spindle organizing protein 2A OS=Homo sapiens GN=MZT2A PE=1 SV=2;>tr|B8ZZ87|B8ZZ87_HUMAN Mitotic-spindle organizing protein 2B OS	5	4	4	2	39.9	39.9	17.7	16.225	158	158;158;218;122;140	NaN	NaN	NaN	NaN	NaN	NaN	NaN	NaN	NaN	NaN	NaN	NaN	NaN	1.0652	NaN	NaN	0.95614	1.0812	1.0541	1.3235	NaN	1.177	1.1195	1.1307	0.88985	1.2163	1.2453	1.1528	1.3019	1.1254	1.1766	NaN
P63165;B8ZZN6;B8ZZJ0;B8ZZ67;A8MUS8;B9A032	P63165;B8ZZN6;B8ZZJ0;B8ZZ67;A8MUS8;B9A032	4;4;2;2;2;2	4;4;2;2;2;2	4;4;2;2;2;2	Small ubiquitin-related modifier 1	SUMO1	>sp|P63165|SUMO1_HUMAN Small ubiquitin-related modifier 1 OS=Homo sapiens GN=SUMO1 PE=1 SV=1;>tr|B8ZZN6|B8ZZN6_HUMAN Small ubiquitin-related modifier 1 OS=Homo sapiens GN=SUMO1 PE=2 SV=1;>tr|B8ZZJ0|B8ZZJ0_HUMAN Small ubiquitin-related modifier 1 OS=Homo sa	6	4	4	4	43.6	43.6	43.6	11.557	101	101;146;58;62;76;77	0.98829	1.016	0.96642	NaN	NaN	0.95731	NaN	0.86775	NaN	NaN	NaN	NaN	NaN	NaN	1.03	NaN	NaN	NaN	1.0284	1.0782	NaN	0.91828	1.0417	1.1726	0.89629	1.0946	1.2292	1.1111	1.0379	0.92453	1.2147	1.146
P06454;P06454-2;B8ZZQ6;B8ZZA1;B8ZZW7;H7C2N1	P06454;P06454-2;B8ZZQ6;B8ZZA1;B8ZZW7;H7C2N1	4;4;4;2;2;2	4;4;4;2;2;2	4;4;4;2;2;2	Prothymosin alpha;Prothymosin alpha, N-terminally processed;Thymosin alpha-1	PTMA	>sp|P06454|PTMA_HUMAN Prothymosin alpha OS=Homo sapiens GN=PTMA PE=1 SV=2;>sp|P06454-2|PTMA_HUMAN Isoform 2 of Prothymosin alpha OS=Homo sapiens GN=PTMA;>tr|B8ZZQ6|B8ZZQ6_HUMAN Thymosin alpha-1 OS=Homo sapiens GN=PTMA PE=4 SV=1;>tr|B8ZZA1|B8ZZA1_HUMAN Thym	6	4	4	4	37.8	37.8	37.8	12.203	111	111;110;107;131;136;148	1.0746	NaN	NaN	NaN	NaN	NaN	NaN	NaN	NaN	NaN	NaN	NaN	NaN	NaN	NaN	NaN	NaN	NaN	NaN	NaN	NaN	NaN	NaN	NaN	NaN	NaN	NaN	NaN	NaN	NaN	NaN	NaN
Q8NBF6;Q8NBF6-2;B8ZZW5;H7C0I1;Q8N6Z3	Q8NBF6;Q8NBF6-2;B8ZZW5;H7C0I1	3;3;3;2;1	3;3;3;2;1	3;3;3;2;1	Late secretory pathway protein AVL9 homolog	AVL9	>sp|Q8NBF6|AVL9_HUMAN Late secretory pathway protein AVL9 homolog OS=Homo sapiens GN=AVL9 PE=1 SV=1;>sp|Q8NBF6-2|AVL9_HUMAN Isoform 2 of Late secretory pathway protein AVL9 homolog OS=Homo sapiens GN=AVL9;>tr|B8ZZW5|B8ZZW5_HUMAN Late secretory pathway prot	5	3	3	3	5.1	5.1	5.1	71.947	648	648;591;630;568;463	NaN	NaN	NaN	NaN	NaN	NaN	NaN	NaN	NaN	NaN	NaN	NaN	NaN	NaN	NaN	NaN	NaN	NaN	NaN	NaN	NaN	NaN	NaN	NaN	NaN	NaN	NaN	NaN	NaN	NaN	NaN	NaN
Q96G21;B9A008;E7ENR5;H0Y714;B8ZZ47	Q96G21;B9A008;E7ENR5;H0Y714;B8ZZ47	6;6;6;6;5	6;6;6;6;5	6;6;6;6;5	U3 small nucleolar ribonucleoprotein protein IMP4	IMP4	>sp|Q96G21|IMP4_HUMAN U3 small nucleolar ribonucleoprotein protein IMP4 OS=Homo sapiens GN=IMP4 PE=1 SV=1;>tr|B9A008|B9A008_HUMAN U3 small nucleolar ribonucleoprotein protein IMP4 (Fragment) OS=Homo sapiens GN=IMP4 PE=2 SV=1;>tr|E7ENR5|E7ENR5_HUMAN U3 smal	5	6	6	6	25.1	25.1	25.1	33.756	291	291;172;236;280;248	NaN	NaN	NaN	NaN	NaN	NaN	NaN	NaN	NaN	NaN	NaN	NaN	NaN	NaN	NaN	NaN	NaN	NaN	NaN	NaN	NaN	NaN	NaN	NaN	NaN	NaN	NaN	NaN	NaN	NaN	NaN	NaN
Q53GS9;B9A018;B8ZZD1;Q53GS9-2;G5E9H0;C9JIU2;F8WC91;C9J0X5	Q53GS9;B9A018;B8ZZD1;Q53GS9-2;G5E9H0	15;15;14;12;12;3;3;1	15;15;14;12;12;3;3;1	15;15;14;12;12;3;3;1	U4/U6.U5 tri-snRNP-associated protein 2	USP39	>sp|Q53GS9|SNUT2_HUMAN U4/U6.U5 tri-snRNP-associated protein 2 OS=Homo sapiens GN=USP39 PE=1 SV=2;>tr|B9A018|B9A018_HUMAN U4/U6.U5 tri-snRNP-associated protein 2 OS=Homo sapiens GN=USP39 PE=2 SV=1;>tr|B8ZZD1|B8ZZD1_HUMAN U4/U6.U5 tri-snRNP-associated prote	8	15	15	15	35	35	35	65.38	565	565;536;502;462;488;129;154;113	0.89787	1.1764	1.3034	1.2366	1.2161	1.1493	1.074	0.84884	1.159	1.4774	1.4466	1.0462	1.1187	0.91963	1.0034	0.80919	0.8798	1.0582	0.9847	1.1022	0.87743	1.1486	0.94189	1.2281	0.9435	0.95558	0.99533	0.8011	0.94437	1.2781	0.96474	1.0198
Q9P0S3;Q53FV1;B9A069	Q9P0S3;Q53FV1;B9A069	1;1;1	1;1;1	1;1;1	ORM1-like protein 1;ORM1-like protein 2	ORMDL1;ORMDL2	>sp|Q9P0S3|ORML1_HUMAN ORM1-like protein 1 OS=Homo sapiens GN=ORMDL1 PE=2 SV=1;>sp|Q53FV1|ORML2_HUMAN ORM1-like protein 2 OS=Homo sapiens GN=ORMDL2 PE=2 SV=2;>tr|B9A069|B9A069_HUMAN ORM1-like protein 1 OS=Homo sapiens GN=ORMDL1 PE=4 SV=1	3	1	1	1	9.8	9.8	9.8	17.371	153	153;153;109	NaN	NaN	NaN	NaN	NaN	NaN	NaN	NaN	NaN	NaN	NaN	NaN	NaN	NaN	NaN	NaN	NaN	NaN	NaN	NaN	NaN	NaN	NaN	NaN	NaN	NaN	NaN	NaN	NaN	NaN	NaN	NaN
F8W1Z6;F8VWA6;B9EGP5;Q7Z3U7-4;Q7Z3U7;Q7Z3U7-2;F8VZV1;Q7Z3U7-3;F8VZV6;F8VQS2;F8VZQ3	F8W1Z6;F8VWA6;B9EGP5;Q7Z3U7-4;Q7Z3U7;Q7Z3U7-2;F8VZV1	24;24;24;24;23;23;12;10;1;1;1	24;24;24;24;23;23;12;10;1;1;1	24;24;24;24;23;23;12;10;1;1;1	Protein MON2 homolog	MON2	>tr|F8W1Z6|F8W1Z6_HUMAN Protein MON2 homolog OS=Homo sapiens GN=MON2 PE=2 SV=1;>tr|F8VWA6|F8VWA6_HUMAN Protein MON2 homolog OS=Homo sapiens GN=MON2 PE=2 SV=1;>tr|B9EGP5|B9EGP5_HUMAN MON2 protein OS=Homo sapiens GN=MON2 PE=2 SV=1;>sp|Q7Z3U7-4|MON2_HUMAN Iso	11	24	24	24	16.2	16.2	16.2	185.85	1675	1675;1688;1711;1717;1718;1676;1072;586;43;59;91	NaN	1.478	NaN	1.166	1.2757	1.2126	1.1589	1.0964	1.2468	1.116	1.0817	1.2157	NaN	1.0754	NaN	NaN	NaN	0.91945	1.051	1.0523	1.161	0.9702	0.9011	1.1919	0.986	1.0074	1.0408	1.3356	NaN	1.0959	1.2924	1.0057
Q6GYQ0;Q6GYQ0-2;Q6GYQ0-3;Q6GYQ0-4;B9EK38;Q6GYQ0-5;Q6GYQ0-6	Q6GYQ0;Q6GYQ0-2;Q6GYQ0-3;Q6GYQ0-4;B9EK38;Q6GYQ0-5;Q6GYQ0-6	2;2;2;2;2;2;2	2;2;2;2;2;2;2	2;2;2;2;2;2;2	Ral GTPase-activating protein subunit alpha-1	RALGAPA1;GARNL1	>sp|Q6GYQ0|RGPA1_HUMAN Ral GTPase-activating protein subunit alpha-1 OS=Homo sapiens GN=RALGAPA1 PE=1 SV=1;>sp|Q6GYQ0-2|RGPA1_HUMAN Isoform 2 of Ral GTPase-activating protein subunit alpha-1 OS=Homo sapiens GN=RALGAPA1;>sp|Q6GYQ0-3|RGPA1_HUMAN Isoform 3 of	7	2	2	2	1.2	1.2	1.2	229.83	2036	2036;2083;1104;1961;2049;2073;2083	NaN	NaN	NaN	NaN	NaN	NaN	NaN	NaN	NaN	NaN	NaN	NaN	NaN	NaN	NaN	NaN	NaN	NaN	NaN	NaN	NaN	NaN	NaN	NaN	NaN	NaN	NaN	NaN	NaN	NaN	NaN	NaN
O95602;B9ZVN9;F2Z3I7	O95602;B9ZVN9	29;29;1	29;29;1	28;28;1	DNA-directed RNA polymerase I subunit RPA1;DNA-directed RNA polymerase	POLR1A	>sp|O95602|RPA1_HUMAN DNA-directed RNA polymerase I subunit RPA1 OS=Homo sapiens GN=POLR1A PE=1 SV=2;>tr|B9ZVN9|B9ZVN9_HUMAN DNA-directed RNA polymerase OS=Homo sapiens GN=POLR1A PE=2 SV=1	3	29	29	28	24.4	24.4	23.9	194.81	1720	1720;1659;42	0.78045	1.1031	1.1182	1.405	1.3546	1.0371	1.2972	NaN	1.5047	1.1189	1.2658	1.3817	1.1082	1.358	1.7273	1.2368	1.2394	1.6429	0.81261	1.3052	NaN	NaN	1.4752	1.1733	0.88869	1.5283	1.3964	1.3432	1.1569	1.0989	1.161	0.99666
Q16611;C0H5Y7	Q16611;C0H5Y7	1;1	1;1	1;1	Bcl-2 homologous antagonist/killer	BAK1	>sp|Q16611|BAK_HUMAN Bcl-2 homologous antagonist/killer OS=Homo sapiens GN=BAK1 PE=1 SV=1;>tr|C0H5Y7|C0H5Y7_HUMAN BAK1 protein OS=Homo sapiens GN=BAK1 PE=2 SV=1	2	1	1	1	16.1	16.1	16.1	23.408	211	211;153	NaN	NaN	NaN	NaN	NaN	NaN	NaN	NaN	NaN	NaN	NaN	NaN	NaN	NaN	NaN	NaN	NaN	NaN	NaN	NaN	NaN	NaN	NaN	NaN	NaN	NaN	NaN	NaN	NaN	NaN	NaN	NaN
O94817;C1IDX9	O94817;C1IDX9	2;2	2;2	2;2	Ubiquitin-like protein ATG12	ATG12	>sp|O94817|ATG12_HUMAN Ubiquitin-like protein ATG12 OS=Homo sapiens GN=ATG12 PE=1 SV=1;>tr|C1IDX9|C1IDX9_HUMAN ATG12 autophagy related 12 homolog (S. cerevisiae), isoform CRA_b OS=Homo sapiens GN=ATG12 PE=2 SV=1	2	2	2	2	7.9	7.9	7.9	15.113	140	140;187	NaN	NaN	NaN	NaN	NaN	NaN	NaN	NaN	NaN	NaN	NaN	NaN	NaN	NaN	NaN	NaN	NaN	NaN	NaN	NaN	NaN	NaN	NaN	NaN	NaN	NaN	NaN	NaN	NaN	NaN	NaN	NaN
Q96HR3;C6GKU9	Q96HR3;C6GKU9	2;2	2;2	2;2	Mediator of RNA polymerase II transcription subunit 30	MED30;MED30S	>sp|Q96HR3|MED30_HUMAN Mediator of RNA polymerase II transcription subunit 30 OS=Homo sapiens GN=MED30 PE=1 SV=1;>tr|C6GKU9|C6GKU9_HUMAN Mediator of RNA polymerase II transcription subunit 30 OS=Homo sapiens GN=MED30S PE=2 SV=1	2	2	2	2	11.8	11.8	11.8	20.277	178	178;143	NaN	NaN	NaN	NaN	NaN	NaN	NaN	NaN	NaN	NaN	NaN	NaN	NaN	NaN	NaN	NaN	NaN	NaN	NaN	NaN	NaN	NaN	NaN	NaN	NaN	NaN	NaN	NaN	NaN	NaN	NaN	NaN
Q9UHC7;C9J031;C9IY57;Q9UHC7-4;Q9UHC7-3;Q9UHC7-2;C9JYX8	Q9UHC7;C9J031;C9IY57;Q9UHC7-4;Q9UHC7-3;Q9UHC7-2;C9JYX8	2;2;2;2;2;2;1	2;2;2;2;2;2;1	2;2;2;2;2;2;1	E3 ubiquitin-protein ligase makorin-1	MKRN1	>sp|Q9UHC7|MKRN1_HUMAN E3 ubiquitin-protein ligase makorin-1 OS=Homo sapiens GN=MKRN1 PE=1 SV=3;>tr|C9J031|C9J031_HUMAN E3 ubiquitin-protein ligase makorin-1 (Fragment) OS=Homo sapiens GN=MKRN1 PE=2 SV=1;>tr|C9IY57|C9IY57_HUMAN E3 ubiquitin-protein ligase	7	2	2	2	4.4	4.4	4.4	53.349	482	482;165;193;329;412;418;136	NaN	NaN	NaN	NaN	NaN	NaN	NaN	NaN	NaN	NaN	NaN	NaN	NaN	NaN	NaN	NaN	NaN	NaN	NaN	NaN	NaN	NaN	NaN	NaN	NaN	NaN	NaN	NaN	NaN	NaN	NaN	NaN
Q0PNE2;C9JLH5;C9JA82;C9J2D6;C9J9N8;C9JEX8;C9IYN7;Q0PNE2-2;F8WE64	Q0PNE2;C9JLH5;C9JA82;C9J2D6;C9J9N8;C9JEX8;C9IYN7;Q0PNE2-2;F8WE64	3;3;3;3;3;3;3;3;2	3;3;3;3;3;3;3;3;2	3;3;3;3;3;3;3;3;2	Elongator complex protein 6	ELP6;C3orf75	>sp|Q0PNE2|ELP6_HUMAN Elongator complex protein 6 OS=Homo sapiens GN=ELP6 PE=1 SV=1;>tr|C9JLH5|C9JLH5_HUMAN Elongator complex protein 6 (Fragment) OS=Homo sapiens GN=ELP6 PE=2 SV=1;>tr|C9JA82|C9JA82_HUMAN Elongator complex protein 6 (Fragment) OS=Homo sapi	9	3	3	3	13.5	13.5	13.5	29.793	266	266;80;99;113;151;158;193;250;68	NaN	NaN	NaN	NaN	NaN	NaN	NaN	NaN	NaN	NaN	NaN	NaN	NaN	NaN	NaN	NaN	NaN	NaN	NaN	NaN	NaN	NaN	NaN	NaN	NaN	NaN	NaN	NaN	NaN	NaN	NaN	NaN
Q9BV23;C9J010;C9JNE7	Q9BV23;C9J010;C9JNE7	2;2;2	2;2;2	2;2;2	Monoacylglycerol lipase ABHD6	ABHD6	>sp|Q9BV23|ABHD6_HUMAN Monoacylglycerol lipase ABHD6 OS=Homo sapiens GN=ABHD6 PE=2 SV=1;>tr|C9J010|C9J010_HUMAN Monoacylglycerol lipase ABHD6 (Fragment) OS=Homo sapiens GN=ABHD6 PE=2 SV=1;>tr|C9JNE7|C9JNE7_HUMAN Monoacylglycerol lipase ABHD6 (Fragment) OS=	3	2	2	2	6.8	6.8	6.8	38.33	337	337;173;225	NaN	NaN	NaN	NaN	NaN	NaN	NaN	NaN	NaN	NaN	NaN	NaN	NaN	NaN	NaN	NaN	NaN	NaN	NaN	NaN	NaN	NaN	NaN	NaN	NaN	NaN	NaN	NaN	NaN	NaN	NaN	NaN
Q9GZV5;C9J038;C9J337	Q9GZV5;C9J038;C9J337	2;2;1	2;2;1	2;2;1	WW domain-containing transcription regulator protein 1	WWTR1	>sp|Q9GZV5|WWTR1_HUMAN WW domain-containing transcription regulator protein 1 OS=Homo sapiens GN=WWTR1 PE=1 SV=1;>tr|C9J038|C9J038_HUMAN WW domain-containing transcription regulator protein 1 (Fragment) OS=Homo sapiens GN=WWTR1 PE=2 SV=1;>tr|C9J337|C9J337_	3	2	2	2	7.8	7.8	7.8	44.101	400	400;189;247	NaN	NaN	NaN	NaN	NaN	NaN	NaN	NaN	NaN	NaN	NaN	NaN	NaN	NaN	NaN	NaN	NaN	NaN	NaN	NaN	NaN	NaN	NaN	NaN	NaN	NaN	NaN	NaN	NaN	NaN	NaN	NaN
Q9UQN3;C9J0A7;Q9UQN3-2;Q92828	Q9UQN3;C9J0A7	5;5;2;1	5;5;2;1	5;5;2;1	Charged multivesicular body protein 2b	CHMP2B	>sp|Q9UQN3|CHM2B_HUMAN Charged multivesicular body protein 2b OS=Homo sapiens GN=CHMP2B PE=1 SV=1;>tr|C9J0A7|C9J0A7_HUMAN Charged multivesicular body protein 2b OS=Homo sapiens GN=CHMP2B PE=2 SV=1	4	5	5	5	16.9	16.9	16.9	23.906	213	213;183;172;525	NaN	1.1508	NaN	1.0606	NaN	1.4606	NaN	NaN	NaN	NaN	NaN	0.93959	NaN	NaN	NaN	NaN	NaN	NaN	NaN	NaN	NaN	NaN	NaN	NaN	NaN	NaN	NaN	NaN	NaN	NaN	NaN	NaN
Q86WB0;Q86WB0-3;C9J0I9;Q86WB0-2;C9J672;F8WAU5;F8WBD7;F8WDK5;F8WF13	Q86WB0;Q86WB0-3;C9J0I9;Q86WB0-2	12;12;12;10;4;2;1;1;1	12;12;12;10;4;2;1;1;1	12;12;12;10;4;2;1;1;1	Nuclear-interacting partner of ALK	ZC3HC1	>sp|Q86WB0|NIPA_HUMAN Nuclear-interacting partner of ALK OS=Homo sapiens GN=ZC3HC1 PE=1 SV=1;>sp|Q86WB0-3|NIPA_HUMAN Isoform 3 of Nuclear-interacting partner of ALK OS=Homo sapiens GN=ZC3HC1;>tr|C9J0I9|C9J0I9_HUMAN Nuclear-interacting partner of ALK OS=Hom	9	12	12	12	32.3	32.3	32.3	55.261	502	502;431;459;481;187;95;49;50;53	NaN	1.4012	1.4174	NaN	NaN	1.203	0.87242	1.0481	1.1627	1.117	1.1587	1.0112	NaN	1.1927	1.4118	NaN	0.96553	NaN	0.99701	NaN	1.2104	0.94017	1.2598	1.1618	0.92045	1.0741	1.0718	NaN	NaN	1.164	1.4931	1.3012
Q9Y618;C9JE98;C9J239;Q9Y618-5;C9J0Q5;Q9Y618-4;C9JFD3;Q9Y618-3;C9J7T7;C9JQE8;Q9Y618-2;C9J330;H0YGK8;H7C0P3;H7C1Y3;H7C2D4;H7BZU2;H7C2R5;C9JNV9;H7C1J7	Q9Y618;C9JE98;C9J239;Q9Y618-5;C9J0Q5;Q9Y618-4;C9JFD3;Q9Y618-3;C9J7T7;C9JQE8	16;16;16;16;16;16;15;15;13;11;5;4;3;2;2;2;1;1;1;1	16;16;16;16;16;16;15;15;13;11;5;4;3;2;2;2;1;1;1;1	16;16;16;16;16;16;15;15;13;11;5;4;3;2;2;2;1;1;1;1	Nuclear receptor corepressor 2	NCOR2	>sp|Q9Y618|NCOR2_HUMAN Nuclear receptor corepressor 2 OS=Homo sapiens GN=NCOR2 PE=1 SV=2;>tr|C9JE98|C9JE98_HUMAN Nuclear receptor corepressor 2 OS=Homo sapiens GN=NCOR2 PE=2 SV=1;>tr|C9J239|C9J239_HUMAN Nuclear receptor corepressor 2 OS=Homo sapiens GN=NCO	20	16	16	16	9.9	9.9	9.9	274.8	2525	2525;2458;2459;2462;2504;2508;2514;2517;2075;1451;769;493;275;156;245;311;129;132;162;225	NaN	NaN	NaN	NaN	NaN	NaN	NaN	NaN	NaN	NaN	NaN	NaN	NaN	NaN	NaN	NaN	NaN	NaN	NaN	NaN	NaN	NaN	NaN	NaN	NaN	NaN	NaN	NaN	NaN	NaN	NaN	NaN
Q9BQQ3;C9J5S6;H7C0J2;C9JBH8;C9J0V5;Q9BQQ3-2;Q9BQQ3-3;G3V0G1	Q9BQQ3;C9J5S6;H7C0J2;C9JBH8;C9J0V5;Q9BQQ3-2;Q9BQQ3-3;G3V0G1	1;1;1;1;1;1;1;1	1;1;1;1;1;1;1;1	1;1;1;1;1;1;1;1	Golgi reassembly-stacking protein 1	GORASP1	>sp|Q9BQQ3|GORS1_HUMAN Golgi reassembly-stacking protein 1 OS=Homo sapiens GN=GORASP1 PE=1 SV=3;>tr|C9J5S6|C9J5S6_HUMAN Golgi reassembly-stacking protein 1 (Fragment) OS=Homo sapiens GN=GORASP1 PE=2 SV=1;>tr|H7C0J2|H7C0J2_HUMAN Golgi reassembly-stacking pr	8	1	1	1	4.8	4.8	4.8	46.482	440	440;70;141;158;193;215;246;316	NaN	NaN	NaN	NaN	NaN	NaN	NaN	NaN	NaN	NaN	NaN	NaN	NaN	NaN	NaN	NaN	NaN	NaN	NaN	NaN	NaN	NaN	NaN	NaN	NaN	NaN	NaN	NaN	NaN	NaN	NaN	NaN
P56524;C9J0X4;C9J481;F5H5W4;Q9UQL6;K7EJL6;Q9UQL6-2;Q9UQL6-3	P56524;C9J0X4;C9J481;F5H5W4	3;3;3;3;1;1;1;1	3;3;3;3;1;1;1;1	3;3;3;3;1;1;1;1	Histone deacetylase 4	HDAC4	>sp|P56524|HDAC4_HUMAN Histone deacetylase 4 OS=Homo sapiens GN=HDAC4 PE=1 SV=3;>tr|C9J0X4|C9J0X4_HUMAN Histone deacetylase 4 (Fragment) OS=Homo sapiens GN=HDAC4 PE=2 SV=1;>tr|C9J481|C9J481_HUMAN Histone deacetylase 4 (Fragment) OS=Homo sapiens GN=HDAC4 PE	8	3	3	3	3.3	3.3	3.3	119.04	1084	1084;123;162;737;1122;79;1037;1123	NaN	NaN	NaN	NaN	NaN	NaN	NaN	NaN	NaN	NaN	NaN	NaN	NaN	NaN	NaN	NaN	NaN	NaN	NaN	NaN	NaN	NaN	NaN	NaN	NaN	NaN	NaN	NaN	NaN	NaN	NaN	NaN
Q9P0P0;F8WBU5;C9J391;C9J1C6;H7C426	Q9P0P0;F8WBU5;C9J391;C9J1C6;H7C426	2;2;2;2;1	2;2;2;2;1	2;2;2;2;1	E3 ubiquitin-protein ligase RNF181	RNF181	>sp|Q9P0P0|RN181_HUMAN E3 ubiquitin-protein ligase RNF181 OS=Homo sapiens GN=RNF181 PE=1 SV=1;>tr|F8WBU5|F8WBU5_HUMAN E3 ubiquitin-protein ligase RNF181 OS=Homo sapiens GN=RNF181 PE=2 SV=1;>tr|C9J391|C9J391_HUMAN E3 ubiquitin-protein ligase RNF181 (Fragmen	5	2	2	2	18.3	18.3	18.3	17.909	153	153;78;103;139;170	NaN	NaN	NaN	NaN	NaN	NaN	NaN	NaN	NaN	NaN	NaN	NaN	NaN	NaN	NaN	NaN	NaN	NaN	NaN	NaN	NaN	NaN	NaN	NaN	NaN	NaN	NaN	NaN	NaN	NaN	NaN	NaN
Q9Y6K9;C9J1R1;Q9Y6K9-2;A8MV29;E7EU78;F8W9A9;C9JZ85;C9JN51;Q9Y6K9-3;C9J2V2;C9JH59;C9JCG6	Q9Y6K9;C9J1R1;Q9Y6K9-2;A8MV29;E7EU78;F8W9A9;C9JZ85;C9JN51	9;9;9;8;8;7;6;5;4;3;3;1	9;9;9;8;8;7;6;5;4;3;3;1	9;9;9;8;8;7;6;5;4;3;3;1	NF-kappa-B essential modulator	IKBKG	>sp|Q9Y6K9|NEMO_HUMAN NF-kappa-B essential modulator OS=Homo sapiens GN=IKBKG PE=1 SV=2;>tr|C9J1R1|C9J1R1_HUMAN NF-kappa-B essential modulator OS=Homo sapiens GN=IKBKG PE=2 SV=1;>sp|Q9Y6K9-2|NEMO_HUMAN Isoform 2 of NF-kappa-B essential modulator OS=Homo sa	12	9	9	9	27.4	27.4	27.4	48.197	419	419;418;487;411;412;368;190;251;320;195;206;138	1.4006	NaN	NaN	NaN	NaN	NaN	1.237	0.99236	0.99055	0.95592	1.0194	0.99382	1.1031	0.80523	1.0265	1.1322	1.0768	0.85192	1.1714	NaN	NaN	NaN	1.0686	NaN	NaN	1.0172	1.285	0.90757	0.93491	NaN	1.3236	1.804
Q969M7;H3BUI7;F8WB39;F8WDQ9;Q969M7-5;Q969M7-4;F8WD80;H3BSR4;C9JFD2;C9J212;C9J9P8;Q969M7-2	Q969M7;H3BUI7;F8WB39;F8WDQ9;Q969M7-5;Q969M7-4;F8WD80;H3BSR4;C9JFD2;C9J212;C9J9P8;Q969M7-2	1;1;1;1;1;1;1;1;1;1;1;1	1;1;1;1;1;1;1;1;1;1;1;1	1;1;1;1;1;1;1;1;1;1;1;1	NEDD8-conjugating enzyme UBE2F	UBE2F	>sp|Q969M7|UBE2F_HUMAN NEDD8-conjugating enzyme UBE2F OS=Homo sapiens GN=UBE2F PE=1 SV=1;>tr|H3BUI7|H3BUI7_HUMAN Ubiquitin-conjugating enzyme E2F (Putative), isoform CRA_a OS=Homo sapiens GN=UBE2F PE=4 SV=1;>tr|F8WB39|F8WB39_HUMAN NEDD8-conjugating enzyme	12	1	1	1	7.6	7.6	7.6	21.077	185	185;73;86;101;102;120;123;131;142;164;171;211	NaN	NaN	NaN	NaN	NaN	NaN	NaN	NaN	NaN	NaN	NaN	NaN	NaN	NaN	NaN	NaN	NaN	NaN	NaN	NaN	NaN	NaN	NaN	NaN	NaN	NaN	NaN	NaN	NaN	NaN	NaN	NaN
Q5JS54;C9J2F8;F8WBZ2;D6RB92;D6REN3;E2QRC7;H7C465;F2Z3E0	Q5JS54;C9J2F8;F8WBZ2;D6RB92;D6REN3;E2QRC7;H7C465	5;5;4;4;3;3;3;1	5;5;4;4;3;3;3;1	5;5;4;4;3;3;3;1	Proteasome assembly chaperone 4	PSMG4	>sp|Q5JS54|PSMG4_HUMAN Proteasome assembly chaperone 4 OS=Homo sapiens GN=PSMG4 PE=2 SV=2;>tr|C9J2F8|C9J2F8_HUMAN HCG22882, isoform CRA_a OS=Homo sapiens GN=PSMG4 PE=4 SV=1;>tr|F8WBZ2|F8WBZ2_HUMAN Proteasome assembly chaperone 4 OS=Homo sapiens GN=PSMG4 PE	8	5	5	5	60.2	60.2	60.2	13.775	123	123;162;104;108;76;82;117;124	1.0515	1.3048	1.2342	1.3426	1.1599	1.1422	NaN	1.1133	1.2769	NaN	1.1595	1.1995	1.1103	1.0802	1.2118	NaN	1.0811	1.1401	0.88303	0.97978	0.99952	0.78024	1.2408	1.1848	NaN	NaN	1.2488	1.081	1.0422	1.3383	0.95082	0.89934
P51965;C9J2P0;H7C061;P51965-2;K4DI90	P51965;C9J2P0;H7C061;P51965-2;K4DI90	4;4;4;4;3	1;1;1;1;0	1;1;1;1;0	Ubiquitin-conjugating enzyme E2 E1	UBE2E1	>sp|P51965|UB2E1_HUMAN Ubiquitin-conjugating enzyme E2 E1 OS=Homo sapiens GN=UBE2E1 PE=1 SV=1;>tr|C9J2P0|C9J2P0_HUMAN Ubiquitin-conjugating enzyme E2 E1 (Fragment) OS=Homo sapiens GN=UBE2E1 PE=2 SV=1;>tr|H7C061|H7C061_HUMAN Ubiquitin-conjugating enzyme E2	5	4	1	1	28.5	9.3	9.3	21.404	193	193;147;151;160;176	NaN	NaN	NaN	NaN	0.97196	NaN	NaN	0.82883	NaN	1.1757	1.1331	1.0467	1.1512	NaN	NaN	NaN	NaN	NaN	NaN	NaN	NaN	NaN	NaN	NaN	NaN	NaN	NaN	NaN	NaN	NaN	NaN	NaN
P30876;C9J2Y9;C9J4M6	P30876;C9J2Y9;C9J4M6	21;21;20	21;21;20	21;21;20	DNA-directed RNA polymerase II subunit RPB2;DNA-directed RNA polymerase	POLR2B	>sp|P30876|RPB2_HUMAN DNA-directed RNA polymerase II subunit RPB2 OS=Homo sapiens GN=POLR2B PE=1 SV=1;>tr|C9J2Y9|C9J2Y9_HUMAN DNA-directed RNA polymerase OS=Homo sapiens GN=POLR2B PE=2 SV=2;>tr|C9J4M6|C9J4M6_HUMAN DNA-directed RNA polymerase OS=Homo sapien	3	21	21	21	27	27	27	133.9	1174	1174;1167;1099	1.067	1.4509	1.0425	NaN	1.0766	1.4112	2.493	1.0686	NaN	1.1501	NaN	1.2498	1.235	1.4263	NaN	NaN	1.0574	1.1292	1.2279	1.5402	1.743	1.2059	1.4481	1.3042	0.92662	1.1967	1.3294	1.2944	1.356	1.3929	1.2414	1.1755
C9J384;Q9BQ75;E9PHS3;H7C515	C9J384;Q9BQ75;E9PHS3	8;7;7;2	8;7;7;2	8;7;7;2	Protein CMSS1	CMSS1	>tr|C9J384|C9J384_HUMAN Protein CMSS1 (Fragment) OS=Homo sapiens GN=CMSS1 PE=2 SV=1;>sp|Q9BQ75|CMS1_HUMAN Protein CMSS1 OS=Homo sapiens GN=CMSS1 PE=1 SV=2;>tr|E9PHS3|E9PHS3_HUMAN Protein CMSS1 OS=Homo sapiens GN=CMSS1 PE=2 SV=1	4	8	8	8	43.1	43.1	43.1	26.228	225	225;279;261;82	0.93068	0.96676	1.2884	0.95264	1.3161	0.968	1.2023	NaN	1.0428	1.0688	1.0067	1.1677	0.9116	1.2139	1.2513	0.93703	0.91419	1.0445	NaN	1.3942	1.793	NaN	1.7965	1.3904	NaN	1.42	1.4975	1.4607	NaN	1.5014	NaN	NaN
Q9NQ55;Q9NQ55-2;C9J3F9;A8MV53;H7C446;C9J3W3;C9JHF7	Q9NQ55;Q9NQ55-2;C9J3F9;A8MV53	11;11;11;10;5;5;3	11;11;11;10;5;5;3	11;11;11;10;5;5;3	Suppressor of SWI4 1 homolog	PPAN	>sp|Q9NQ55|SSF1_HUMAN Suppressor of SWI4 1 homolog OS=Homo sapiens GN=PPAN PE=1 SV=1;>sp|Q9NQ55-2|SSF1_HUMAN Isoform 2 of Suppressor of SWI4 1 homolog OS=Homo sapiens GN=PPAN;>tr|C9J3F9|C9J3F9_HUMAN Protein PPAN-P2RY11 OS=Homo sapiens GN=PPAN-P2RY11 PE=4 S	7	11	11	11	29.8	29.8	29.8	53.193	473	473;460;520;420;208;210;97	NaN	NaN	NaN	NaN	0.94305	NaN	1.0254	NaN	NaN	NaN	NaN	NaN	NaN	0.93877	NaN	0.86092	NaN	NaN	NaN	NaN	NaN	NaN	3.2928	NaN	NaN	NaN	NaN	NaN	NaN	NaN	NaN	NaN
C9J3L7;E7EVL6;C9J7N1;C9JZE3;C9JYJ8;Q9BWE0	C9J3L7;E7EVL6;C9J7N1;C9JZE3;C9JYJ8;Q9BWE0	2;2;2;2;2;2	2;2;2;2;2;2	2;2;2;2;2;2	Replication initiator 1	REPIN1	>tr|C9J3L7|C9J3L7_HUMAN Replication initiator 1 OS=Homo sapiens GN=REPIN1 PE=2 SV=2;>tr|E7EVL6|E7EVL6_HUMAN Replication initiator 1 (Fragment) OS=Homo sapiens GN=REPIN1 PE=2 SV=1;>tr|C9J7N1|C9J7N1_HUMAN Replication initiator 1 (Fragment) OS=Homo sapiens GN	6	2	2	2	3.8	3.8	3.8	69.919	624	624;146;204;366;394;567	NaN	NaN	NaN	NaN	NaN	NaN	NaN	NaN	NaN	NaN	NaN	NaN	NaN	NaN	NaN	NaN	NaN	NaN	NaN	NaN	NaN	NaN	NaN	NaN	NaN	NaN	NaN	NaN	NaN	NaN	NaN	NaN
C9J3R0	C9J3R0	13	1	1		RCC1	>tr|C9J3R0|C9J3R0_HUMAN Regulator of chromosome condensation (Fragment) OS=Homo sapiens GN=RCC1 PE=2 SV=1	1	13	1	1	60.1	2.6	2.6	29.57	273	273	NaN	NaN	NaN	NaN	NaN	NaN	NaN	NaN	NaN	NaN	NaN	NaN	NaN	NaN	NaN	NaN	NaN	NaN	NaN	NaN	NaN	NaN	NaN	NaN	NaN	NaN	NaN	NaN	NaN	NaN	NaN	NaN
O60513;C9J5S0;C9J4S5;E7ETS9;C9J3R8;C9JY38;C9J644;C9JE00	O60513;C9J5S0;C9J4S5;E7ETS9;C9J3R8;C9JY38;C9J644;C9JE00	2;2;2;2;2;1;1;1	2;2;2;2;2;1;1;1	2;2;2;2;2;1;1;1	Beta-1,4-galactosyltransferase 4;N-acetyllactosamine synthase;Lactotriaosylceramide beta-1,4-galactosyltransferase	B4GALT4	>sp|O60513|B4GT4_HUMAN Beta-1,4-galactosyltransferase 4 OS=Homo sapiens GN=B4GALT4 PE=1 SV=1;>tr|C9J5S0|C9J5S0_HUMAN N-acetyllactosamine synthase (Fragment) OS=Homo sapiens GN=B4GALT4 PE=2 SV=1;>tr|C9J4S5|C9J4S5_HUMAN N-acetyllactosamine synthase (Fragment	8	2	2	2	8.4	8.4	8.4	40.041	344	344;118;136;246;301;21;42;55	NaN	NaN	NaN	NaN	NaN	NaN	NaN	NaN	NaN	NaN	NaN	NaN	NaN	NaN	NaN	NaN	NaN	NaN	NaN	NaN	NaN	NaN	NaN	NaN	NaN	NaN	NaN	NaN	NaN	NaN	NaN	NaN
C9J406;H7C463	C9J406;H7C463	37;35	1;0	1;0		IMMT	>tr|C9J406|C9J406_HUMAN Mitochondrial inner membrane protein OS=Homo sapiens GN=IMMT PE=2 SV=1;>tr|H7C463|H7C463_HUMAN Mitochondrial inner membrane protein (Fragment) OS=Homo sapiens GN=IMMT PE=4 SV=1	2	37	1	1	61	3.6	3.6	73.253	659	659;613	NaN	NaN	NaN	NaN	NaN	NaN	NaN	NaN	NaN	NaN	NaN	NaN	NaN	NaN	NaN	NaN	NaN	NaN	NaN	NaN	NaN	NaN	NaN	NaN	NaN	NaN	NaN	NaN	NaN	NaN	NaN	NaN
P61513;C9J4Z3;M0R0A1;Q6P4E4;E9PEL3;M0R2L6;G5E9R3;A6NKH3	P61513;C9J4Z3;M0R0A1;Q6P4E4;E9PEL3;M0R2L6	3;3;2;2;2;2;1;1	3;3;2;2;2;2;1;1	3;3;2;2;2;2;1;1	60S ribosomal protein L37a	RPL37A	>sp|P61513|RL37A_HUMAN 60S ribosomal protein L37a OS=Homo sapiens GN=RPL37A PE=1 SV=2;>tr|C9J4Z3|C9J4Z3_HUMAN 60S ribosomal protein L37a OS=Homo sapiens GN=RPL37A PE=4 SV=1;>tr|M0R0A1|M0R0A1_HUMAN 60S ribosomal protein L37a OS=Homo sapiens GN=RPL37A PE=4 S	8	3	3	3	41.3	41.3	41.3	10.275	92	92;68;60;72;75;88;58;93	0.94626	1.2005	0.97581	1.0616	1.4066	1.1891	1.0459	1.5316	1.335	1.4681	0.87776	1.1188	1.2648	1.3169	1.5159	1.2322	1.1532	1.3111	0.88347	1.4227	1.2123	1.4306	1.4736	1.3244	1.1442	1.6764	1.2833	1.2182	1.4017	1.2004	1.3511	1.6146
Q5TKA1;C9J5J4;Q5TKA1-3;H7C4T7;Q5TKA1-2;H0Y322	Q5TKA1;C9J5J4;Q5TKA1-3;H7C4T7;Q5TKA1-2;H0Y322	1;1;1;1;1;1	1;1;1;1;1;1	1;1;1;1;1;1	Protein lin-9 homolog	LIN9	>sp|Q5TKA1|LIN9_HUMAN Protein lin-9 homolog OS=Homo sapiens GN=LIN9 PE=1 SV=1;>tr|C9J5J4|C9J5J4_HUMAN Protein lin-9 homolog OS=Homo sapiens GN=LIN9 PE=2 SV=1;>sp|Q5TKA1-3|LIN9_HUMAN Isoform 3 of Protein lin-9 homolog OS=Homo sapiens GN=LIN9;>tr|H7C4T7|H7C4	6	1	1	1	4.1	4.1	4.1	61.945	542	542;489;507;518;558;613	NaN	NaN	NaN	NaN	NaN	NaN	NaN	NaN	NaN	NaN	NaN	NaN	NaN	NaN	NaN	NaN	NaN	NaN	NaN	NaN	NaN	NaN	NaN	NaN	NaN	NaN	NaN	NaN	NaN	NaN	NaN	NaN
C9J634	C9J634	9	1	1		PDHB	>tr|C9J634|C9J634_HUMAN Pyruvate dehydrogenase E1 component subunit beta, mitochondrial OS=Homo sapiens GN=PDHB PE=2 SV=1	1	9	1	1	36.9	2	2	38.405	350	350	NaN	NaN	NaN	NaN	NaN	NaN	NaN	NaN	NaN	NaN	NaN	NaN	NaN	NaN	NaN	NaN	NaN	NaN	NaN	NaN	NaN	NaN	NaN	NaN	NaN	NaN	NaN	NaN	NaN	NaN	NaN	NaN
Q9GZY4;C9J6J1;C9JA07	Q9GZY4;C9J6J1;C9JA07	1;1;1	1;1;1	1;1;1	Cytochrome c oxidase assembly protein 1 homolog	COA1	>sp|Q9GZY4|COA1_HUMAN Cytochrome c oxidase assembly protein 1 homolog OS=Homo sapiens GN=COA1 PE=1 SV=1;>tr|C9J6J1|C9J6J1_HUMAN Cytochrome c oxidase assembly protein 1 homolog (Fragment) OS=Homo sapiens GN=COA1 PE=2 SV=1;>tr|C9JA07|C9JA07_HUMAN Cytochrome	3	1	1	1	17.8	17.8	17.8	16.694	146	146;88;113	NaN	NaN	NaN	NaN	NaN	NaN	NaN	NaN	NaN	NaN	NaN	NaN	NaN	NaN	NaN	NaN	NaN	NaN	NaN	NaN	NaN	NaN	NaN	NaN	NaN	NaN	NaN	NaN	NaN	NaN	NaN	NaN
C9J6N5;C9JQ40;C9JW51;Q9H098;C9JP05;C9J3Q3;C9JYP1;C9J6Y8;F8WCJ2	C9J6N5;C9JQ40;C9JW51;Q9H098;C9JP05;C9J3Q3;C9JYP1;C9J6Y8	5;5;5;5;4;4;3;3;2	5;5;5;5;4;4;3;3;2	1;1;1;1;1;1;1;1;1	Protein FAM107B	FAM107B	>tr|C9J6N5|C9J6N5_HUMAN Protein FAM107B (Fragment) OS=Homo sapiens GN=FAM107B PE=2 SV=1;>tr|C9JQ40|C9JQ40_HUMAN Protein FAM107B (Fragment) OS=Homo sapiens GN=FAM107B PE=2 SV=1;>tr|C9JW51|C9JW51_HUMAN Protein FAM107B (Fragment) OS=Homo sapiens GN=FAM107B PE	9	5	5	1	48	48	14.4	14.943	125	125;126;128;131;93;101;67;84;51	NaN	NaN	NaN	NaN	NaN	NaN	NaN	NaN	NaN	NaN	NaN	NaN	NaN	NaN	NaN	NaN	NaN	NaN	NaN	1.3299	NaN	0.92229	1.2095	1.1426	0.59264	1.1805	NaN	1.1258	1.2881	NaN	1.0875	1.2801
P35080;C9J712;P35080-2;C9J0J7;C9JQ45;G5E9Q6	P35080;C9J712;P35080-2;C9J0J7;C9JQ45;G5E9Q6	2;2;1;1;1;1	2;2;1;1;1;1	2;2;1;1;1;1	Profilin-2;Profilin	PFN2	>sp|P35080|PROF2_HUMAN Profilin-2 OS=Homo sapiens GN=PFN2 PE=1 SV=3;>tr|C9J712|C9J712_HUMAN Profilin-2 OS=Homo sapiens GN=PFN2 PE=4 SV=1;>sp|P35080-2|PROF2_HUMAN Isoform IIb of Profilin-2 OS=Homo sapiens GN=PFN2;>tr|C9J0J7|C9J0J7_HUMAN Profilin-2 OS=Homo s	6	2	2	2	15.7	15.7	15.7	15.046	140	140;91;140;91;110;188	NaN	NaN	NaN	NaN	NaN	NaN	NaN	NaN	NaN	NaN	NaN	NaN	NaN	NaN	NaN	NaN	NaN	NaN	NaN	NaN	NaN	NaN	NaN	NaN	NaN	NaN	NaN	NaN	NaN	NaN	NaN	NaN
Q9Y2I1;Q9Y2I1-4;Q9Y2I1-3;C9J715	Q9Y2I1;Q9Y2I1-4;Q9Y2I1-3;C9J715	2;2;2;2	2;2;2;2	2;2;2;2	Nischarin	NISCH	>sp|Q9Y2I1|NISCH_HUMAN Nischarin OS=Homo sapiens GN=NISCH PE=1 SV=3;>sp|Q9Y2I1-4|NISCH_HUMAN Isoform 4 of Nischarin OS=Homo sapiens GN=NISCH;>sp|Q9Y2I1-3|NISCH_HUMAN Isoform 3 of Nischarin OS=Homo sapiens GN=NISCH;>tr|C9J715|C9J715_HUMAN Nischarin OS=Homo	4	2	2	2	1.9	1.9	1.9	166.63	1504	1504;515;583;583	NaN	NaN	1.2869	NaN	NaN	NaN	NaN	NaN	1.11	NaN	1.4473	NaN	NaN	NaN	1.4819	NaN	1.3213	NaN	NaN	NaN	NaN	NaN	NaN	NaN	NaN	NaN	NaN	NaN	NaN	NaN	NaN	NaN
Q16644;C9J8E1	Q16644;C9J8E1	5;5	3;3	3;3	MAP kinase-activated protein kinase 3	MAPKAPK3	>sp|Q16644|MAPK3_HUMAN MAP kinase-activated protein kinase 3 OS=Homo sapiens GN=MAPKAPK3 PE=1 SV=1;>tr|C9J8E1|C9J8E1_HUMAN MAP kinase-activated protein kinase 3 (Fragment) OS=Homo sapiens GN=MAPKAPK3 PE=2 SV=1	2	5	3	3	21.7	16.5	16.5	42.987	382	382;332	NaN	NaN	NaN	NaN	NaN	NaN	NaN	NaN	NaN	NaN	NaN	NaN	NaN	NaN	NaN	NaN	NaN	NaN	NaN	NaN	NaN	NaN	NaN	NaN	NaN	NaN	NaN	NaN	NaN	NaN	NaN	NaN
P57772;C9J8T0	P57772;C9J8T0	11;11	11;11	11;11	Selenocysteine-specific elongation factor	EEFSEC	>sp|P57772|SELB_HUMAN Selenocysteine-specific elongation factor OS=Homo sapiens GN=EEFSEC PE=1 SV=4;>tr|C9J8T0|C9J8T0_HUMAN Selenocysteine-specific elongation factor OS=Homo sapiens GN=EEFSEC PE=2 SV=1	2	11	11	11	27.5	27.5	27.5	65.304	596	596;436	NaN	NaN	NaN	1.2751	NaN	1.0001	NaN	1.5156	NaN	1.3439	1.169	NaN	NaN	1.4827	1.5368	1.5584	0.9811	0.99918	NaN	1.1235	NaN	1.5137	1.2887	1.413	0.97807	NaN	1.2676	NaN	1.3343	1.3724	1.3932	1.5187
Q9Y2X8;P51668;H0YGA2;Q9UQL0;C9J9H9	Q9Y2X8;P51668;H0YGA2;Q9UQL0;C9J9H9	2;2;2;2;2	1;1;1;1;1	1;1;1;1;1	Ubiquitin-conjugating enzyme E2 D4;Ubiquitin-conjugating enzyme E2 D1	UBE2D4;UBE2D1	>sp|Q9Y2X8|UB2D4_HUMAN Ubiquitin-conjugating enzyme E2 D4 OS=Homo sapiens GN=UBE2D4 PE=1 SV=1;>sp|P51668|UB2D1_HUMAN Ubiquitin-conjugating enzyme E2 D1 OS=Homo sapiens GN=UBE2D1 PE=1 SV=1;>tr|H0YGA2|H0YGA2_HUMAN Ubiquitin-conjugating enzyme E2 D4 (Fragment	5	2	1	1	19.7	7.5	7.5	16.649	147	147;147;39;109;122	NaN	NaN	NaN	NaN	NaN	NaN	NaN	NaN	NaN	NaN	NaN	NaN	NaN	NaN	NaN	NaN	NaN	NaN	NaN	NaN	NaN	NaN	NaN	NaN	NaN	NaN	NaN	NaN	NaN	NaN	NaN	NaN
P08865;C9J9K3;A6NE09;C9JQR9	P08865;C9J9K3;A6NE09	17;17;14;4	17;17;14;4	17;17;14;4	40S ribosomal protein SA	RPSA;RPSAP58	>sp|P08865|RSSA_HUMAN 40S ribosomal protein SA OS=Homo sapiens GN=RPSA PE=1 SV=4;>tr|C9J9K3|C9J9K3_HUMAN 40S ribosomal protein SA (Fragment) OS=Homo sapiens GN=RPSA PE=2 SV=1;>tr|A6NE09|A6NE09_HUMAN Protein RPSAP58 OS=Homo sapiens GN=RPSAP58 PE=3 SV=1	4	17	17	17	63.7	63.7	63.7	32.854	295	295;264;295;73	0.98641	1.1391	1.1093	1.1198	1.1694	1.1555	1.1304	1.0413	1.16	1.1116	1.1095	1.0708	1.1135	1.1742	1.2815	1.1272	1.1056	1.1364	0.98379	1.273	1.2062	1.1291	1.3021	1.2329	1.0018	1.1402	1.1693	1.2017	1.2115	1.1583	1.2144	1.2176
Q96D46;C9JA08;C9J0B9;C9IZW9;C9K0C2;C9IY70	Q96D46;C9JA08	19;19;8;6;6;5	19;19;8;6;6;5	19;19;8;6;6;5	60S ribosomal export protein NMD3	NMD3	>sp|Q96D46|NMD3_HUMAN 60S ribosomal export protein NMD3 OS=Homo sapiens GN=NMD3 PE=1 SV=1;>tr|C9JA08|C9JA08_HUMAN 60S ribosomal export protein NMD3 OS=Homo sapiens GN=NMD3 PE=2 SV=1	6	19	19	19	49.9	49.9	49.9	57.603	503	503;529;218;156;162;98	1.1103	1.1503	1.1479	1.0741	1.122	1.2338	1.1905	1.0208	1.2594	1.0952	1.0944	1.0937	1.172	1.1816	1.2335	1.0841	1.0528	1.2678	1.0298	1.2905	1.173	1.229	1.0672	1.188	0.99015	1.2572	0.99276	1.0422	1.3618	1.3389	1.0631	0.98835
P18564;C9JA97;E9PEE8	P18564;C9JA97;E9PEE8	1;1;1	1;1;1	1;1;1	Integrin beta-6;Integrin beta	ITGB6	>sp|P18564|ITB6_HUMAN Integrin beta-6 OS=Homo sapiens GN=ITGB6 PE=1 SV=2;>tr|C9JA97|C9JA97_HUMAN Integrin beta OS=Homo sapiens GN=ITGB6 PE=2 SV=1;>tr|E9PEE8|E9PEE8_HUMAN Integrin beta OS=Homo sapiens GN=ITGB6 PE=2 SV=1	3	1	1	1	1.1	1.1	1.1	85.935	788	788;681;746	NaN	NaN	NaN	NaN	NaN	NaN	NaN	NaN	NaN	NaN	NaN	NaN	NaN	NaN	NaN	NaN	NaN	NaN	NaN	NaN	NaN	NaN	NaN	NaN	NaN	NaN	NaN	NaN	NaN	NaN	NaN	NaN
Q16629;Q16629-3;Q16629-2;Q16629-4;C9JAB2	Q16629;Q16629-3;Q16629-2;Q16629-4;C9JAB2	7;7;7;7;7	6;6;6;6;6	6;6;6;6;6	Serine/arginine-rich splicing factor 7	SRSF7	>sp|Q16629|SRSF7_HUMAN Serine/arginine-rich splicing factor 7 OS=Homo sapiens GN=SRSF7 PE=1 SV=1;>sp|Q16629-3|SRSF7_HUMAN Isoform 3 of Serine/arginine-rich splicing factor 7 OS=Homo sapiens GN=SRSF7;>sp|Q16629-2|SRSF7_HUMAN Isoform 2 of Serine/arginine-ric	5	7	6	6	24.4	24.4	24.4	27.366	238	238;132;135;226;235	0.86507	1.019	1.0557	1.032	1.0608	1.0432	1.0007	1.1036	1.0838	1.0083	1.0909	1.0569	1.0603	1.1209	1.1568	0.98012	0.92879	1.0846	0.95649	1.1049	1.0613	1.095	1.1234	1.0365	0.87432	0.91774	0.96262	0.95719	0.9807	0.99205	1.0022	1.0649
Q16595;C9JAX1;H7C585;A8MXJ6;Q16595-2	Q16595;C9JAX1;H7C585	5;5;4;2;2	5;5;4;2;2	5;5;4;2;2	Frataxin, mitochondrial;Frataxin intermediate form;Frataxin(56-210);Frataxin(78-210);Frataxin mature form	FXN	>sp|Q16595|FRDA_HUMAN Frataxin, mitochondrial OS=Homo sapiens GN=FXN PE=1 SV=2;>tr|C9JAX1|C9JAX1_HUMAN Frataxin, mitochondrial OS=Homo sapiens GN=FXN PE=2 SV=1;>tr|H7C585|H7C585_HUMAN Frataxin, mitochondrial (Fragment) OS=Homo sapiens GN=FXN PE=4 SV=1	5	5	5	5	25.7	25.7	25.7	23.135	210	210;135;108;196;171	1.0109	0.87723	1.2874	1.1687	1.1274	0.99884	1.1564	NaN	NaN	1.0902	NaN	NaN	NaN	NaN	NaN	NaN	NaN	NaN	NaN	NaN	1.0445	NaN	NaN	NaN	NaN	0.91524	NaN	NaN	NaN	NaN	NaN	NaN
Q9NW68;Q9NW68-9;Q9NW68-4;Q9NW68-8;C9JB13;Q9NW68-2;Q9NW68-7;Q9NW68-3;E9PS77;E9PQA7;B4DM89	Q9NW68;Q9NW68-9;Q9NW68-4;Q9NW68-8;C9JB13;Q9NW68-2;Q9NW68-7;Q9NW68-3;E9PS77;E9PQA7;B4DM89	2;2;2;2;2;2;2;2;1;1;1	2;2;2;2;2;2;2;2;1;1;1	2;2;2;2;2;2;2;2;1;1;1	BSD domain-containing protein 1	BSDC1	>sp|Q9NW68|BSDC1_HUMAN BSD domain-containing protein 1 OS=Homo sapiens GN=BSDC1 PE=1 SV=1;>sp|Q9NW68-9|BSDC1_HUMAN Isoform 9 of BSD domain-containing protein 1 OS=Homo sapiens GN=BSDC1;>sp|Q9NW68-4|BSDC1_HUMAN Isoform 4 of BSD domain-containing protein 1 O	11	2	2	2	6.3	6.3	6.3	47.163	430	430;335;353;374;422;428;447;474;156;178;369	NaN	NaN	NaN	NaN	NaN	NaN	NaN	NaN	NaN	NaN	NaN	NaN	NaN	NaN	NaN	NaN	NaN	NaN	NaN	NaN	NaN	NaN	NaN	NaN	NaN	NaN	NaN	NaN	NaN	NaN	NaN	NaN
P10646;C9JBB3;P10646-2;C9JKV3;C9JT76;C9JQ14;C9JP39;C9J103	P10646;C9JBB3;P10646-2;C9JKV3;C9JT76;C9JQ14	6;6;5;4;3;3;1;1	6;6;5;4;3;3;1;1	6;6;5;4;3;3;1;1	Tissue factor pathway inhibitor	TFPI	>sp|P10646|TFPI1_HUMAN Tissue factor pathway inhibitor OS=Homo sapiens GN=TFPI PE=1 SV=1;>tr|C9JBB3|C9JBB3_HUMAN Tissue factor pathway inhibitor (Fragment) OS=Homo sapiens GN=TFPI PE=2 SV=1;>sp|P10646-2|TFPI1_HUMAN Isoform Beta of Tissue factor pathway inh	8	6	6	6	31.6	31.6	31.6	35.015	304	304;288;251;215;105;106;61;76	NaN	NaN	NaN	NaN	NaN	NaN	NaN	NaN	NaN	NaN	NaN	NaN	NaN	NaN	NaN	NaN	NaN	NaN	NaN	NaN	NaN	NaN	NaN	NaN	NaN	NaN	NaN	NaN	NaN	NaN	NaN	NaN
Q9Y6A9;C9JBL1	Q9Y6A9;C9JBL1	2;2	2;2	2;2	Signal peptidase complex subunit 1	SPCS1	>sp|Q9Y6A9|SPCS1_HUMAN Signal peptidase complex subunit 1 OS=Homo sapiens GN=SPCS1 PE=1 SV=3;>tr|C9JBL1|C9JBL1_HUMAN Signal peptidase complex subunit 1 OS=Homo sapiens GN=SPCS1 PE=2 SV=1	2	2	2	2	10.1	10.1	10.1	18.298	169	169;80	NaN	NaN	NaN	NaN	NaN	NaN	NaN	NaN	NaN	NaN	NaN	NaN	NaN	NaN	NaN	NaN	NaN	NaN	NaN	NaN	NaN	NaN	NaN	NaN	NaN	NaN	NaN	NaN	NaN	NaN	NaN	NaN
Q96DA6;C9JBV1	Q96DA6;C9JBV1	2;2	2;2	2;2	Mitochondrial import inner membrane translocase subunit TIM14	DNAJC19	>sp|Q96DA6|TIM14_HUMAN Mitochondrial import inner membrane translocase subunit TIM14 OS=Homo sapiens GN=DNAJC19 PE=1 SV=3;>tr|C9JBV1|C9JBV1_HUMAN DnaJ (Hsp40) homolog, subfamily C, member 19, isoform CRA_a OS=Homo sapiens GN=DNAJC19 PE=4 SV=1	2	2	2	2	20.7	20.7	20.7	12.498	116	116;91	NaN	NaN	NaN	NaN	NaN	NaN	NaN	NaN	NaN	NaN	NaN	NaN	NaN	NaN	NaN	NaN	NaN	NaN	NaN	NaN	NaN	NaN	NaN	NaN	NaN	NaN	NaN	NaN	NaN	NaN	NaN	NaN
Q9BT25;Q9BT25-2;C9JBZ4	Q9BT25;Q9BT25-2;C9JBZ4	3;3;3	3;3;3	3;3;3	HAUS augmin-like complex subunit 8	HAUS8	>sp|Q9BT25|HAUS8_HUMAN HAUS augmin-like complex subunit 8 OS=Homo sapiens GN=HAUS8 PE=1 SV=3;>sp|Q9BT25-2|HAUS8_HUMAN Isoform 2 of HAUS augmin-like complex subunit 8 OS=Homo sapiens GN=HAUS8;>tr|C9JBZ4|C9JBZ4_HUMAN HAUS augmin-like complex subunit 8 OS=Hom	3	3	3	3	12	12	12	44.857	410	410;349;409	NaN	NaN	NaN	NaN	NaN	NaN	NaN	NaN	NaN	NaN	NaN	NaN	NaN	NaN	NaN	NaN	NaN	NaN	NaN	NaN	NaN	NaN	NaN	NaN	NaN	NaN	NaN	NaN	NaN	NaN	NaN	NaN
Q14919;Q14919-2;C9JCC6;E9PNC7;E9PQX9;E9PMW2	Q14919;Q14919-2;C9JCC6;E9PNC7;E9PQX9	5;5;5;3;3;2	5;5;5;3;3;2	5;5;5;3;3;2	Dr1-associated corepressor	DRAP1	>sp|Q14919|NC2A_HUMAN Dr1-associated corepressor OS=Homo sapiens GN=DRAP1 PE=1 SV=3;>sp|Q14919-2|NC2A_HUMAN Isoform 2 of Dr1-associated corepressor OS=Homo sapiens GN=DRAP1;>tr|C9JCC6|C9JCC6_HUMAN Dr1-associated corepressor OS=Homo sapiens GN=DRAP1 PE=2 SV	6	5	5	5	27.8	27.8	27.8	22.35	205	205;211;212;156;185;161	NaN	NaN	NaN	NaN	NaN	NaN	NaN	NaN	NaN	NaN	NaN	NaN	NaN	NaN	NaN	NaN	NaN	NaN	0.97882	NaN	1.0765	0.99618	0.99786	1.056	0.7393	0.96616	1.0048	NaN	NaN	1.0182	0.962	0.96489
P15408;C9JCN8;P15408-3;P15408-2	P15408;C9JCN8;P15408-3;P15408-2	2;2;2;1	2;2;2;1	2;2;2;1	Fos-related antigen 2	FOSL2	>sp|P15408|FOSL2_HUMAN Fos-related antigen 2 OS=Homo sapiens GN=FOSL2 PE=1 SV=1;>tr|C9JCN8|C9JCN8_HUMAN Fos-related antigen 2 (Fragment) OS=Homo sapiens GN=FOSL2 PE=2 SV=1;>sp|P15408-3|FOSL2_HUMAN Isoform 3 of Fos-related antigen 2 OS=Homo sapiens GN=FOSL2	4	2	2	2	7.4	7.4	7.4	35.193	326	326;202;287;318	NaN	NaN	NaN	NaN	NaN	NaN	NaN	NaN	NaN	NaN	NaN	NaN	NaN	NaN	NaN	NaN	NaN	NaN	NaN	NaN	NaN	NaN	NaN	NaN	NaN	NaN	NaN	NaN	NaN	NaN	NaN	NaN
Q9Y6Q9;Q9Y6Q9-4;C9JCR8;Q9Y6Q9-2;Q9Y6Q9-3;Q9Y6Q9-5	Q9Y6Q9;Q9Y6Q9-4;C9JCR8;Q9Y6Q9-2;Q9Y6Q9-3;Q9Y6Q9-5	3;3;3;3;3;3	3;3;3;3;3;3	3;3;3;3;3;3	Nuclear receptor coactivator 3	NCOA3	>sp|Q9Y6Q9|NCOA3_HUMAN Nuclear receptor coactivator 3 OS=Homo sapiens GN=NCOA3 PE=1 SV=1;>sp|Q9Y6Q9-4|NCOA3_HUMAN Isoform 4 of Nuclear receptor coactivator 3 OS=Homo sapiens GN=NCOA3;>tr|C9JCR8|C9JCR8_HUMAN Nuclear receptor coactivator 3 OS=Homo sapiens GN	6	3	3	3	3.4	3.4	3.4	155.29	1424	1424;1350;1350;1409;1415;1420	NaN	NaN	NaN	NaN	NaN	NaN	NaN	NaN	NaN	NaN	NaN	NaN	NaN	NaN	NaN	NaN	NaN	NaN	NaN	NaN	NaN	NaN	NaN	NaN	NaN	NaN	NaN	NaN	NaN	NaN	NaN	NaN
Q13685;C9JG97;C9JEH3;C9JTS3;H7C0R2	Q13685;C9JG97;C9JEH3;C9JTS3	4;4;4;3;1	4;4;4;3;1	4;4;4;3;1	Angio-associated migratory cell protein	AAMP	>sp|Q13685|AAMP_HUMAN Angio-associated migratory cell protein OS=Homo sapiens GN=AAMP PE=1 SV=2;>tr|C9JG97|C9JG97_HUMAN Angio-associated migratory cell protein OS=Homo sapiens GN=AAMP PE=2 SV=1;>tr|C9JEH3|C9JEH3_HUMAN Angio-associated migratory cell protei	5	4	4	4	12.9	12.9	12.9	46.75	434	434;415;435;201;189	NaN	NaN	NaN	NaN	NaN	NaN	NaN	1.012	NaN	NaN	NaN	NaN	NaN	NaN	NaN	NaN	NaN	1.1826	NaN	NaN	NaN	NaN	NaN	1.2311	NaN	NaN	NaN	NaN	NaN	NaN	1.1669	1.1734
P49585;C9JEJ2;C9J050;B4E322;H7C1T3;C9J2E1;C9JPY0;H7BZN1;Q9Y5K3;Q9Y5K3-3;Q9Y5K3-2;Q9Y5K3-4;C9JVS0;F8WAZ5;F8WBU2;F2Z2B1	P49585;C9JEJ2;C9J050;B4E322;H7C1T3;C9J2E1	13;13;12;11;8;7;5;5;4;4;4;4;3;3;1;1	13;13;12;11;8;7;5;5;4;4;4;4;3;3;1;1	13;13;12;11;8;7;5;5;4;4;4;4;3;3;1;1	Choline-phosphate cytidylyltransferase A	PCYT1A	>sp|P49585|PCY1A_HUMAN Choline-phosphate cytidylyltransferase A OS=Homo sapiens GN=PCYT1A PE=1 SV=2;>tr|C9JEJ2|C9JEJ2_HUMAN Choline-phosphate cytidylyltransferase A OS=Homo sapiens GN=PCYT1A PE=2 SV=1;>tr|C9J050|C9J050_HUMAN Choline-phosphate cytidylyltran	16	13	13	13	49.3	49.3	49.3	41.731	367	367;380;293;328;201;213;133;137;369;351;330;351;115;134;90;177	0.91124	1.1159	0.99505	0.89725	1.2045	1.1442	1.0778	0.91567	1.1471	1.021	0.99517	1.0271	1.1349	1.2203	1.1855	0.93563	1.103	1.103	1.0498	1.1479	1.0454	1.0239	1.1505	1.0016	0.87966	1.0141	1.0639	1.2424	1.1201	1.227	1.0911	1.085
O95639;C9JEV9;O95639-3;O95639-2;F8WEL7;B7Z7B0;H7C419	O95639;C9JEV9;O95639-3;O95639-2;F8WEL7;B7Z7B0;H7C419	2;2;2;2;1;1;1	2;2;2;2;1;1;1	2;2;2;2;1;1;1	Cleavage and polyadenylation specificity factor subunit 4	CPSF4	>sp|O95639|CPSF4_HUMAN Cleavage and polyadenylation specificity factor subunit 4 OS=Homo sapiens GN=CPSF4 PE=1 SV=1;>tr|C9JEV9|C9JEV9_HUMAN Cleavage and polyadenylation-specificity factor subunit 4 OS=Homo sapiens GN=CPSF4 PE=2 SV=1;>sp|O95639-3|CPSF4_HUMA	7	2	2	2	12.3	12.3	12.3	30.255	269	269;211;243;244;44;191;193	NaN	NaN	NaN	NaN	NaN	NaN	NaN	NaN	NaN	NaN	NaN	NaN	NaN	NaN	NaN	NaN	NaN	NaN	NaN	NaN	NaN	NaN	NaN	NaN	NaN	NaN	NaN	NaN	NaN	NaN	NaN	NaN
Q13098;C9JFE4;Q13098-5;Q13098-7;J3KSA5;J3QLT0;J3KRJ4;J3QS88;J3KTB0;J3QS84;J3QLE8;J3QL53;J3KRE8;J3QQX0	Q13098;C9JFE4;Q13098-5;Q13098-7	22;22;22;22;10;8;8;6;6;4;4;4;4;3	22;22;22;22;10;8;8;6;6;4;4;4;4;3	8;8;8;8;6;6;6;6;6;4;4;4;4;2	COP9 signalosome complex subunit 1	GPS1	>sp|Q13098|CSN1_HUMAN COP9 signalosome complex subunit 1 OS=Homo sapiens GN=GPS1 PE=1 SV=4;>tr|C9JFE4|C9JFE4_HUMAN COP9 signalosome complex subunit 1 OS=Homo sapiens GN=GPS1 PE=4 SV=2;>sp|Q13098-5|CSN1_HUMAN Isoform 4 of COP9 signalosome complex subunit 1	14	22	22	8	45.2	45.2	16.5	55.536	491	491;471;487;527;210;168;253;134;139;101;166;168;186;79	0.87918	0.98807	1.1593	1.0362	1.2129	1.1421	1.2078	1.0491	1.0743	1.0999	1.0546	1.0343	1.2946	1.3141	1.3792	1.1842	1.026	1.225	1.0915	1.2972	1.1519	1.1078	1.1564	1.1474	0.8677	1.2208	1.2212	1.2112	1.2259	1.1763	1.2492	1.2731
P99999;C9JFR7;CON__P62894	P99999;C9JFR7	10;10;3	10;10;3	10;10;3	Cytochrome c	CYCS	>sp|P99999|CYC_HUMAN Cytochrome c OS=Homo sapiens GN=CYCS PE=1 SV=2;>tr|C9JFR7|C9JFR7_HUMAN Cytochrome c (Fragment) OS=Homo sapiens GN=CYCS PE=2 SV=1	3	10	10	10	59	59	59	11.749	105	105;101;105	0.97278	1.0008	1.1672	0.98467	1.095	1.0504	1.0439	0.9796	1.1401	1.1569	0.9667	1.0221	1.0876	1.1462	1.1489	1.1646	0.92706	1.0972	0.94396	1.0467	0.94449	1.0124	1.1374	1.3429	0.89667	1.0268	0.91414	1.0633	0.92941	0.9475	0.91573	0.97095
P19971;C9JGI3;P19971-2	P19971;C9JGI3;P19971-2	11;11;9	11;11;9	11;11;9	Thymidine phosphorylase	TYMP	>sp|P19971|TYPH_HUMAN Thymidine phosphorylase OS=Homo sapiens GN=TYMP PE=1 SV=2;>tr|C9JGI3|C9JGI3_HUMAN Thymidine phosphorylase (Fragment) OS=Homo sapiens GN=TYMP PE=2 SV=1;>sp|P19971-2|TYPH_HUMAN Isoform 2 of Thymidine phosphorylase OS=Homo sapiens GN=TYM	3	11	11	11	28.2	28.2	28.2	49.955	482	482;445;487	0.97379	NaN	1.1712	1.0789	1.0526	NaN	1.0306	0.95575	NaN	1.038	1.1143	0.95053	NaN	NaN	1.1696	0.90924	1.0867	1.0638	0.98562	1.0411	0.94446	0.93472	1.1462	1.008	0.8082	0.98665	1.0021	0.98735	NaN	0.82995	1.2125	1.1771
P13798;C9JIF9;H7C393;H7C1U0;C9JLK2;F8WEH5;H0YFE5	P13798;C9JIF9;H7C393	21;21;11;10;7;2;1	21;21;11;10;7;2;1	21;21;11;10;7;2;1	Acylamino-acid-releasing enzyme	APEH	>sp|P13798|ACPH_HUMAN Acylamino-acid-releasing enzyme OS=Homo sapiens GN=APEH PE=1 SV=4;>tr|C9JIF9|C9JIF9_HUMAN Acylamino-acid-releasing enzyme OS=Homo sapiens GN=APEH PE=2 SV=1;>tr|H7C393|H7C393_HUMAN Acylamino-acid-releasing enzyme (Fragment) OS=Homo sap	7	21	21	21	39.6	39.6	39.6	81.224	732	732;737;284;308;232;50;47	0.84721	1.0534	1.0728	0.99274	1.0747	1.0327	1.0699	0.98675	0.98041	0.92169	1.071	0.95459	1.0233	1.0111	1.1441	1.0295	0.96613	1.0739	0.91216	1.0961	1.0362	1.0458	1.1512	1.0481	0.84073	1.035	1.0566	1.1099	1.0919	1.086	1.092	1.1459
O75688;C9JIR6;O75688-4;O75688-2;B8ZZF0;O75688-5;O75688-3	O75688;C9JIR6;O75688-4;O75688-2;B8ZZF0;O75688-5	7;7;7;7;6;5;2	7;7;7;7;6;5;2	5;5;5;5;4;3;2	Protein phosphatase 1B	PPM1B	>sp|O75688|PPM1B_HUMAN Protein phosphatase 1B OS=Homo sapiens GN=PPM1B PE=1 SV=1;>tr|C9JIR6|C9JIR6_HUMAN Protein phosphatase 1B (Fragment) OS=Homo sapiens GN=PPM1B PE=2 SV=1;>sp|O75688-4|PPM1B_HUMAN Isoform 4 of Protein phosphatase 1B OS=Homo sapiens GN=PP	7	7	7	5	18	18	15	52.642	479	479;378;380;387;303;327;192	NaN	NaN	NaN	NaN	NaN	NaN	NaN	NaN	NaN	NaN	NaN	NaN	NaN	NaN	NaN	NaN	NaN	NaN	1.4304	NaN	NaN	NaN	2.1609	NaN	NaN	2.6341	NaN	NaN	NaN	NaN	NaN	NaN
P82930;C9JJ19;H3BP88	P82930;C9JJ19;H3BP88	10;10;5	10;10;5	10;10;5	28S ribosomal protein S34, mitochondrial	MRPS34	>sp|P82930|RT34_HUMAN 28S ribosomal protein S34, mitochondrial OS=Homo sapiens GN=MRPS34 PE=1 SV=2;>tr|C9JJ19|C9JJ19_HUMAN 28S ribosomal protein S34, mitochondrial OS=Homo sapiens GN=MRPS34 PE=2 SV=2;>tr|H3BP88|H3BP88_HUMAN 28S ribosomal protein S34, mitoc	3	10	10	10	54.1	54.1	54.1	25.65	218	218;225;125	1.1443	0.83217	1.4798	1.0794	1.2218	0.91573	1.1428	0.96815	1.2854	1.2902	1.0029	1.0103	1.3585	1.1557	1.0002	1.1993	0.8643	1.2048	1.0253	1.1857	1.2605	0.87901	1.1544	0.97435	0.81688	1.2507	1.1548	1.2549	1.1574	1.0406	1.1319	1.1016
P22694;P22694-2;P22694-4;P22694-3;P22694-5;P22694-7;P22694-6;C9JK39;P22694-9;P22694-10;B1APF6;B1APF7;B1APG1;B1APG0;B1APG2;B1APF8;B1APF9;P22694-8;B1APG3;P22612	P22694;P22694-2;P22694-4;P22694-3;P22694-5;P22694-7;P22694-6;C9JK39;P22694-9;P22694-10	10;10;10;10;10;10;10;10;10;9;4;4;4;4;4;4;4;4;4;2	2;2;2;2;2;2;2;2;2;1;2;2;2;2;2;2;2;2;2;0	2;2;2;2;2;2;2;2;2;1;2;2;2;2;2;2;2;2;2;0	cAMP-dependent protein kinase catalytic subunit beta	PRKACB	>sp|P22694|KAPCB_HUMAN cAMP-dependent protein kinase catalytic subunit beta OS=Homo sapiens GN=PRKACB PE=1 SV=2;>sp|P22694-2|KAPCB_HUMAN Isoform 2 of cAMP-dependent protein kinase catalytic subunit beta OS=Homo sapiens GN=PRKACB;>sp|P22694-4|KAPCB_HUMAN Is	20	10	2	2	29.6	8.5	8.5	40.622	351	351;398;338;339;354;355;357;357;358;321;175;186;197;206;209;214;245;257;264;351	NaN	NaN	0.87882	NaN	NaN	NaN	NaN	0.83713	NaN	NaN	NaN	NaN	NaN	NaN	NaN	NaN	NaN	NaN	1.1387	NaN	NaN	NaN	NaN	NaN	0.75982	NaN	NaN	NaN	NaN	NaN	0.96944	1.2996
Q5K651;C9JKF1	Q5K651;C9JKF1	2;2	2;2	2;2	Sterile alpha motif domain-containing protein 9	SAMD9	>sp|Q5K651|SAMD9_HUMAN Sterile alpha motif domain-containing protein 9 OS=Homo sapiens GN=SAMD9 PE=1 SV=1;>tr|C9JKF1|C9JKF1_HUMAN Sterile alpha motif domain-containing protein 9 (Fragment) OS=Homo sapiens GN=SAMD9 PE=2 SV=1	2	2	2	2	1.9	1.9	1.9	184.28	1589	1589;1283	NaN	NaN	NaN	NaN	NaN	NaN	NaN	NaN	NaN	NaN	NaN	NaN	NaN	NaN	NaN	NaN	NaN	NaN	NaN	NaN	NaN	NaN	NaN	NaN	NaN	NaN	NaN	NaN	NaN	NaN	NaN	NaN
C9JL08	C9JL08	1	1	1		PIKFYVE	>tr|C9JL08|C9JL08_HUMAN 1-phosphatidylinositol 3-phosphate 5-kinase (Fragment) OS=Homo sapiens GN=PIKFYVE PE=2 SV=1	1	1	1	1	7.9	7.9	7.9	27.407	241	241	NaN	NaN	NaN	NaN	NaN	NaN	NaN	NaN	NaN	NaN	NaN	NaN	NaN	NaN	NaN	NaN	NaN	NaN	NaN	NaN	NaN	NaN	NaN	NaN	NaN	NaN	NaN	NaN	NaN	NaN	NaN	NaN
P32189;C9JLT1;P32189-1;P32189-4;Q14409;P32189-2	P32189;C9JLT1;P32189-1;P32189-4;Q14409;P32189-2	1;1;1;1;1;1	1;1;1;1;1;1	1;1;1;1;1;1	Glycerol kinase;Putative glycerol kinase 3	GK;GK3P	>sp|P32189|GLPK_HUMAN Glycerol kinase OS=Homo sapiens GN=GK PE=1 SV=3;>tr|C9JLT1|C9JLT1_HUMAN Glycerol kinase OS=Homo sapiens GN=GK PE=2 SV=2;>sp|P32189-1|GLPK_HUMAN Isoform 1 of Glycerol kinase OS=Homo sapiens GN=GK;>sp|P32189-4|GLPK_HUMAN Isoform 4 of Gl	6	1	1	1	2.3	2.3	2.3	61.244	559	559;354;524;530;553;553	NaN	NaN	NaN	NaN	NaN	NaN	NaN	NaN	NaN	NaN	NaN	NaN	NaN	NaN	NaN	NaN	NaN	NaN	NaN	NaN	NaN	NaN	NaN	NaN	NaN	NaN	NaN	NaN	NaN	NaN	NaN	NaN
P52434;C9JLU1;C9JCU7;C9JBJ6;C9J413;C9JUA8	P52434;C9JLU1;C9JCU7;C9JBJ6;C9J413	8;8;6;5;4;1	8;8;6;5;4;1	8;8;6;5;4;1	DNA-directed RNA polymerases I, II, and III subunit RPABC3	POLR2H	>sp|P52434|RPAB3_HUMAN DNA-directed RNA polymerases I, II, and III subunit RPABC3 OS=Homo sapiens GN=POLR2H PE=1 SV=4;>tr|C9JLU1|C9JLU1_HUMAN DNA-directed RNA polymerases I, II, and III subunit RPABC3 (Fragment) OS=Homo sapiens GN=POLR2H PE=2 SV=1;>tr|C9JC	6	8	8	8	56.7	56.7	56.7	17.143	150	150;149;175;114;122;86	NaN	1.2812	1.508	1.1339	1.5899	1.1539	1.2116	1.3263	1.1412	1.1939	1.1054	1.1315	0.95868	1.0549	1.2204	1.2768	1.1953	1.1645	0.95237	1.2336	1.0722	1.0536	1.1287	1.1133	1.0223	1.1334	1.29	1.1681	1.2434	1.0044	1.0737	1.0989
O95104;C9JLZ0;O95104-2	O95104;C9JLZ0;O95104-2	5;5;4	5;5;4	4;4;3	Splicing factor, arginine/serine-rich 15	SCAF4	>sp|O95104|SFR15_HUMAN Splicing factor, arginine/serine-rich 15 OS=Homo sapiens GN=SCAF4 PE=1 SV=3;>tr|C9JLZ0|C9JLZ0_HUMAN Splicing factor, arginine/serine-rich 15 OS=Homo sapiens GN=SCAF4 PE=4 SV=2;>sp|O95104-2|SFR15_HUMAN Isoform 2 of Splicing factor, ar	3	5	5	4	6.9	6.9	6.3	125.87	1147	1147;1132;1125	NaN	NaN	NaN	NaN	NaN	NaN	NaN	NaN	NaN	NaN	NaN	NaN	NaN	NaN	NaN	NaN	NaN	NaN	NaN	NaN	NaN	NaN	NaN	NaN	NaN	NaN	NaN	NaN	NaN	NaN	NaN	NaN
Q9Y4F1;Q9Y4F1-2;C9JME2;M0QYB0;H0Y783;M0QXT1;Q9Y4F1-3;M0R262	Q9Y4F1;Q9Y4F1-2;C9JME2	11;11;11;4;3;3;1;1	11;11;11;4;3;3;1;1	11;11;11;4;3;3;1;1	FERM, RhoGEF and pleckstrin domain-containing protein 1	FARP1	>sp|Q9Y4F1|FARP1_HUMAN FERM, RhoGEF and pleckstrin domain-containing protein 1 OS=Homo sapiens GN=FARP1 PE=1 SV=1;>sp|Q9Y4F1-2|FARP1_HUMAN Isoform 2 of FERM, RhoGEF and pleckstrin domain-containing protein 1 OS=Homo sapiens GN=FARP1;>tr|C9JME2|C9JME2_HUMAN	8	11	11	11	13.8	13.8	13.8	118.63	1045	1045;1076;1076;203;215;248;129;171	NaN	NaN	NaN	1.0378	1.6886	NaN	1.2393	NaN	NaN	NaN	1.3844	NaN	NaN	NaN	NaN	NaN	1.1316	NaN	NaN	NaN	0.63932	NaN	1.0425	NaN	NaN	NaN	1.0004	1.073	NaN	NaN	NaN	NaN
P83731;C9JXB8;C9JNW5	P83731;C9JXB8;C9JNW5	6;6;6	6;6;6	6;6;6	60S ribosomal protein L24	RPL24	>sp|P83731|RL24_HUMAN 60S ribosomal protein L24 OS=Homo sapiens GN=RPL24 PE=1 SV=1;>tr|C9JXB8|C9JXB8_HUMAN 60S ribosomal protein L24 OS=Homo sapiens GN=RPL24 PE=2 SV=1;>tr|C9JNW5|C9JNW5_HUMAN 60S ribosomal protein L24 OS=Homo sapiens GN=RPL24 PE=4 SV=1	3	6	6	6	31.8	31.8	31.8	17.779	157	157;121;150	0.94539	1.5146	1.2771	1.4322	1.7268	1.1384	1.4563	1.4998	1.5397	1.4905	1.268	1.2895	1.4663	1.7409	1.3451	1.3896	1.1854	1.3243	1.0252	1.4391	1.4588	1.1968	1.4822	1.3977	1.118	1.3041	1.2994	1.4239	1.3687	1.4802	1.4479	1.6306
C9JP00;Q9NR56;Q9NR56-3;Q9NR56-4;H7C4T5;Q9NR56-7;Q9NR56-6;Q9NR56-2;Q9NR56-5;Q5VZF2;O95205;Q86VM6;Q5VZF2-3;Q5VZF2-2;Q9NUK0;B4E3F7;Q9NUK0-2;B1AKI6;C9J4T8;C9JCX1;H7C4Y1;Q9NUK0-4;Q9NUK0-3	C9JP00;Q9NR56;Q9NR56-3;Q9NR56-4;H7C4T5;Q9NR56-7;Q9NR56-6;Q9NR56-2;Q9NR56-5	7;6;5;5;5;5;5;5;5;3;3;3;3;3;2;2;2;2;1;1;1;1;1	7;6;5;5;5;5;5;5;5;3;3;3;3;3;2;2;2;2;1;1;1;1;1	7;6;5;5;5;5;5;5;5;3;3;3;3;3;2;2;2;2;1;1;1;1;1	Muscleblind-like protein 1	MBNL1	>tr|C9JP00|C9JP00_HUMAN Muscleblind-like protein 1 OS=Homo sapiens GN=MBNL1 PE=2 SV=1;>sp|Q9NR56|MBNL1_HUMAN Muscleblind-like protein 1 OS=Homo sapiens GN=MBNL1 PE=1 SV=2;>sp|Q9NR56-3|MBNL1_HUMAN Isoform 3 of Muscleblind-like protein 1 OS=Homo sapiens GN=M	23	7	7	7	33	33	33	37.898	348	348;388;302;314;329;340;342;370;382;373;255;343;361;367;354;206;334;342;58;155;210;292;304	1.0642	1.2896	NaN	0.59032	0.69057	0.89419	1.0622	NaN	1.0591	0.95613	1.0268	NaN	1.204	1.1643	1.2666	1.0893	1.158	1.2115	NaN	NaN	1.0911	1.3164	NaN	NaN	NaN	1.1746	0.96192	1.1849	1.0838	NaN	1.98	1.0516
C9JPL0;Q9UK58;Q9UK58-4;Q9UK58-5;Q96S94;Q96S94-2;F2Z3J5	C9JPL0;Q9UK58;Q9UK58-4	5;4;4;2;1;1;1	5;4;4;2;1;1;1	5;4;4;2;1;1;1	Cyclin-L1	CCNL1	>tr|C9JPL0|C9JPL0_HUMAN Cyclin-L1 OS=Homo sapiens GN=CCNL1 PE=2 SV=1;>sp|Q9UK58|CCNL1_HUMAN Cyclin-L1 OS=Homo sapiens GN=CCNL1 PE=1 SV=1;>sp|Q9UK58-4|CCNL1_HUMAN Isoform 2 of Cyclin-L1 OS=Homo sapiens GN=CCNL1	7	5	5	5	15.2	15.2	15.2	47.788	428	428;526;232;172;520;226;236	NaN	NaN	NaN	NaN	NaN	NaN	NaN	NaN	NaN	NaN	NaN	NaN	NaN	NaN	NaN	NaN	NaN	NaN	NaN	NaN	NaN	NaN	NaN	NaN	NaN	NaN	NaN	NaN	NaN	NaN	NaN	NaN
Q4VC31;C9JQ41;H7C525;C9JBU9	Q4VC31;C9JQ41;H7C525	5;5;5;1	5;5;5;1	5;5;5;1	Coiled-coil domain-containing protein 58	CCDC58	>sp|Q4VC31|CCD58_HUMAN Coiled-coil domain-containing protein 58 OS=Homo sapiens GN=CCDC58 PE=1 SV=1;>tr|C9JQ41|C9JQ41_HUMAN Coiled-coil domain-containing protein 58 OS=Homo sapiens GN=CCDC58 PE=2 SV=1;>tr|H7C525|H7C525_HUMAN Coiled-coil domain-containing p	4	5	5	5	41	41	41	16.62	144	144;130;141;53	1.0967	NaN	NaN	0.73864	NaN	NaN	0.61237	NaN	NaN	0.69393	1.3242	0.71366	NaN	NaN	NaN	NaN	0.67212	NaN	NaN	NaN	NaN	NaN	NaN	NaN	NaN	NaN	NaN	NaN	NaN	NaN	NaN	NaN
P05166;E7EUY3;E9PDR0;P05166-2;C9JQS9;E7EX59;F8WBI9;E7ETT4;E7ETT1;E9PEC3;E7ENC1;H7C5C9;C9JAW3;C9JVW9;C9JVY9	P05166;E7EUY3;E9PDR0;P05166-2;C9JQS9;E7EX59;F8WBI9;E7ETT4;E7ETT1;E9PEC3;E7ENC1	7;7;7;7;7;7;6;6;6;5;4;2;1;1;1	7;7;7;7;7;7;6;6;6;5;4;2;1;1;1	7;7;7;7;7;7;6;6;6;5;4;2;1;1;1	Propionyl-CoA carboxylase beta chain, mitochondrial	PCCB	>sp|P05166|PCCB_HUMAN Propionyl-CoA carboxylase beta chain, mitochondrial OS=Homo sapiens GN=PCCB PE=1 SV=3;>tr|E7EUY3|E7EUY3_HUMAN Propionyl-CoA carboxylase beta chain, mitochondrial OS=Homo sapiens GN=PCCB PE=2 SV=1;>tr|E9PDR0|E9PDR0_HUMAN Propionyl-CoA	15	7	7	7	21	21	21	58.215	539	539;516;550;559;559;570;405;482;520;423;303;163;84;134;192	NaN	NaN	NaN	NaN	NaN	NaN	NaN	NaN	NaN	NaN	NaN	NaN	NaN	NaN	NaN	NaN	NaN	NaN	NaN	NaN	NaN	NaN	NaN	NaN	NaN	NaN	NaN	NaN	NaN	NaN	NaN	NaN
P54252-2;P54252;G3V2G1;G3V3T6;G3V328;G3V4U9;P54252-3;G3V3R7;E9PB63;C9JQV6;F5H211;G3V2G2;D6RDL9;G3V526;E9PJN5	P54252-2;P54252;G3V2G1;G3V3T6;G3V328;G3V4U9;P54252-3;G3V3R7;E9PB63;C9JQV6;F5H211;G3V2G2;D6RDL9;G3V526;E9PJN5	2;2;2;2;2;2;2;2;2;2;2;1;1;1;1	2;2;2;2;2;2;2;2;2;2;2;1;1;1;1	2;2;2;2;2;2;2;2;2;2;2;1;1;1;1	Ataxin-3	ATXN3	>sp|P54252-2|ATX3_HUMAN Isoform 2 of Ataxin-3 OS=Homo sapiens GN=ATXN3;>sp|P54252|ATX3_HUMAN Ataxin-3 OS=Homo sapiens GN=ATXN3 PE=1 SV=4;>tr|G3V2G1|G3V2G1_HUMAN Ataxin-3 (Fragment) OS=Homo sapiens GN=ATXN3 PE=2 SV=1;>tr|G3V3T6|G3V3T6_HUMAN Ataxin-3 (Fragme	15	2	2	2	10.2	10.2	10.2	41.25	361	361;364;223;232;260;278;306;329;346;354;370;151;182;200;205	NaN	NaN	NaN	NaN	NaN	NaN	NaN	NaN	NaN	NaN	NaN	NaN	NaN	NaN	NaN	NaN	NaN	NaN	NaN	NaN	NaN	NaN	NaN	NaN	NaN	NaN	NaN	NaN	NaN	NaN	NaN	NaN
Q9UGP4;C9JRJ5	Q9UGP4;C9JRJ5	8;8	8;8	8;8	LIM domain-containing protein 1	LIMD1	>sp|Q9UGP4|LIMD1_HUMAN LIM domain-containing protein 1 OS=Homo sapiens GN=LIMD1 PE=1 SV=1;>tr|C9JRJ5|C9JRJ5_HUMAN LIM domain-containing protein 1 OS=Homo sapiens GN=LIMD1 PE=2 SV=1	2	8	8	8	16	16	16	72.189	676	676;620	NaN	1.5242	NaN	1.4389	NaN	1.4602	NaN	1.3768	NaN	NaN	NaN	NaN	NaN	NaN	NaN	NaN	NaN	NaN	NaN	NaN	NaN	NaN	NaN	NaN	NaN	NaN	NaN	NaN	NaN	0.99323	1.1437	0.99236
Q9NX63;C9JRZ6;F8WAR4;G3V1K1;F8WD73	Q9NX63;C9JRZ6;F8WAR4;G3V1K1	7;7;5;4;1	7;7;5;4;1	7;7;5;4;1	Coiled-coil-helix-coiled-coil-helix domain-containing protein 3, mitochondrial	CHCHD3	>sp|Q9NX63|CHCH3_HUMAN Coiled-coil-helix-coiled-coil-helix domain-containing protein 3, mitochondrial OS=Homo sapiens GN=CHCHD3 PE=1 SV=1;>tr|C9JRZ6|C9JRZ6_HUMAN Coiled-coil-helix-coiled-coil-helix domain-containing protein 3, mitochondrial OS=Homo sapiens	5	7	7	7	32.2	32.2	32.2	26.152	227	227;232;241;138;63	0.9263	0.80895	0.9622	0.80031	0.82453	0.9	0.91984	0.72975	0.93335	0.8872	0.87846	0.75611	0.86741	0.87838	0.81402	0.88566	0.82111	0.85851	1.0371	1.1362	0.81947	1.0661	1.0226	NaN	0.83775	1.005	1.0036	0.89151	1.0571	0.7959	0.87676	0.90435
Q687X5;C9JS50;Q687X5-2	Q687X5;C9JS50;Q687X5-2	6;6;4	6;6;4	6;6;4	Metalloreductase STEAP4	STEAP4	>sp|Q687X5|STEA4_HUMAN Metalloreductase STEAP4 OS=Homo sapiens GN=STEAP4 PE=1 SV=1;>tr|C9JS50|C9JS50_HUMAN Metalloreductase STEAP4 OS=Homo sapiens GN=STEAP4 PE=4 SV=1;>sp|Q687X5-2|STEA4_HUMAN Isoform 2 of Metalloreductase STEAP4 OS=Homo sapiens GN=STEAP4	3	6	6	6	20	20	20	51.981	459	459;339;283	NaN	NaN	NaN	NaN	NaN	NaN	NaN	NaN	NaN	NaN	NaN	NaN	NaN	NaN	NaN	NaN	NaN	NaN	NaN	NaN	NaN	NaN	NaN	NaN	NaN	NaN	NaN	0.81162	NaN	NaN	NaN	NaN
Q9H3U5;H7C5U3;Q9H3U5-2;H7C593;H0Y8B7;H0Y874;Q9H3U5-3;C9JS94;J3KQL7	Q9H3U5;H7C5U3;Q9H3U5-2;H7C593;H0Y8B7;H0Y874;Q9H3U5-3;C9JS94;J3KQL7	1;1;1;1;1;1;1;1;1	1;1;1;1;1;1;1;1;1	1;1;1;1;1;1;1;1;1	Major facilitator superfamily domain-containing protein 1	MFSD1	>sp|Q9H3U5|MFSD1_HUMAN Major facilitator superfamily domain-containing protein 1 OS=Homo sapiens GN=MFSD1 PE=2 SV=2;>tr|H7C5U3|H7C5U3_HUMAN Major facilitator superfamily domain-containing protein 1 (Fragment) OS=Homo sapiens GN=MFSD1 PE=2 SV=1;>sp|Q9H3U5-2	9	1	1	1	2.6	2.6	2.6	51.208	465	465;64;78;84;110;112;426;475;514	NaN	NaN	NaN	NaN	NaN	NaN	NaN	NaN	NaN	NaN	NaN	NaN	NaN	NaN	NaN	NaN	NaN	NaN	NaN	NaN	NaN	NaN	NaN	NaN	NaN	NaN	NaN	NaN	NaN	NaN	NaN	NaN
Q5JRX3;Q5JRX3-2;C9JSL2;E7ES23;H0Y7L7;B1APQ0;H0Y4F7;B1APQ1	Q5JRX3;Q5JRX3-2;C9JSL2;E7ES23	25;25;25;22;6;5;2;1	25;25;25;22;6;5;2;1	25;25;25;22;6;5;2;1	Presequence protease, mitochondrial	PITRM1	>sp|Q5JRX3|PREP_HUMAN Presequence protease, mitochondrial OS=Homo sapiens GN=PITRM1 PE=1 SV=2;>sp|Q5JRX3-2|PREP_HUMAN Isoform 2 of Presequence protease, mitochondrial OS=Homo sapiens GN=PITRM1;>tr|C9JSL2|C9JSL2_HUMAN Presequence protease, mitochondrial OS=	8	25	25	25	35.2	35.2	35.2	117.45	1037	1037;1038;1038;939;259;184;233;86	NaN	0.84808	1.6823	1.3278	0.83994	0.86404	1.4571	0.78102	NaN	0.92641	1.1381	0.9187	1.0404	NaN	0.77888	1.0887	0.72988	1.3446	1.1692	1.2252	1.5169	0.96806	1.2305	1.087	NaN	1.3298	0.95637	1.2249	1.1185	1.4062	1.2424	1.0736
C9JTT8;O15155;Q96EA0;Q68DU7;H7C1N3	C9JTT8;O15155;Q96EA0;Q68DU7;H7C1N3	2;1;1;1;1	2;1;1;1;1	2;1;1;1;1	BET1 homolog	BET1;DKFZp781C0425	>tr|C9JTT8|C9JTT8_HUMAN BET1 homolog OS=Homo sapiens GN=BET1 PE=2 SV=1;>sp|O15155|BET1_HUMAN BET1 homolog OS=Homo sapiens GN=BET1 PE=1 SV=1;>tr|Q96EA0|Q96EA0_HUMAN BET1 homolog OS=Homo sapiens GN=BET1 PE=4 SV=1;>tr|Q68DU7|Q68DU7_HUMAN BET1 homolog OS=Homo	5	2	2	2	22.4	22.4	22.4	11.056	98	98;118;83;127;133	NaN	NaN	NaN	NaN	NaN	NaN	NaN	NaN	NaN	NaN	NaN	NaN	NaN	NaN	NaN	NaN	NaN	NaN	NaN	NaN	NaN	NaN	NaN	NaN	NaN	NaN	NaN	NaN	NaN	NaN	NaN	NaN
P08962;F8VV56;F8VZE2;P08962-2;F8W022;F8VWK8;C9JV86;F8VNT9	P08962;F8VV56;F8VZE2;P08962-2;F8W022;F8VWK8;C9JV86;F8VNT9	3;3;3;3;3;3;3;2	3;3;3;3;3;3;3;2	3;3;3;3;3;3;3;2	CD63 antigen	CD63	>sp|P08962|CD63_HUMAN CD63 antigen OS=Homo sapiens GN=CD63 PE=1 SV=2;>tr|F8VV56|F8VV56_HUMAN CD63 antigen OS=Homo sapiens GN=CD63 PE=4 SV=1;>tr|F8VZE2|F8VZE2_HUMAN CD63 antigen OS=Homo sapiens GN=CD63 PE=4 SV=1;>sp|P08962-2|CD63_HUMAN Isoform 2 of CD63 ant	8	3	3	3	16.8	16.8	16.8	25.636	238	238;145;156;215;215;217;236;133	0.71545	NaN	NaN	NaN	0.82369	NaN	NaN	0.62011	NaN	0.81834	NaN	NaN	0.81326	0.90877	NaN	0.79841	NaN	NaN	NaN	NaN	NaN	0.93689	NaN	NaN	NaN	NaN	NaN	NaN	NaN	NaN	NaN	NaN
Q9UPW0;Q9UPW0-2;H7C1Y6;C9JVP0	Q9UPW0;Q9UPW0-2;H7C1Y6;C9JVP0	1;1;1;1	1;1;1;1	1;1;1;1	Forkhead box protein J3	FOXJ3	>sp|Q9UPW0|FOXJ3_HUMAN Forkhead box protein J3 OS=Homo sapiens GN=FOXJ3 PE=1 SV=2;>sp|Q9UPW0-2|FOXJ3_HUMAN Isoform 2 of Forkhead box protein J3 OS=Homo sapiens GN=FOXJ3;>tr|H7C1Y6|H7C1Y6_HUMAN Forkhead box protein J3 (Fragment) OS=Homo sapiens GN=FOXJ3 PE=	4	1	1	1	3.1	3.1	3.1	68.96	622	622;588;125;382	NaN	NaN	NaN	NaN	NaN	NaN	NaN	NaN	NaN	NaN	NaN	NaN	NaN	NaN	NaN	NaN	NaN	NaN	NaN	NaN	NaN	NaN	NaN	NaN	NaN	NaN	NaN	NaN	NaN	NaN	NaN	NaN
O15530;O15530-2;E9PER6;O15530-3;C9JWR9;Q6A1A2;O15530-5;O15530-4;H3BQ10	O15530;O15530-2;E9PER6;O15530-3;C9JWR9;Q6A1A2;O15530-5	3;3;3;3;3;2;2;1;1	3;3;3;3;3;2;2;1;1	3;3;3;3;3;2;2;1;1	3-phosphoinositide-dependent protein kinase 1;Putative 3-phosphoinositide-dependent protein kinase 2	PDPK1;PDPK2	>sp|O15530|PDPK1_HUMAN 3-phosphoinositide-dependent protein kinase 1 OS=Homo sapiens GN=PDPK1 PE=1 SV=1;>sp|O15530-2|PDPK1_HUMAN Isoform 2 of 3-phosphoinositide-dependent protein kinase 1 OS=Homo sapiens GN=PDPK1;>tr|E9PER6|E9PER6_HUMAN 3-phosphoinositide-	9	3	3	3	5.9	5.9	5.9	63.151	556	556;506;529;530;532;396;454;429;149	NaN	NaN	NaN	NaN	NaN	NaN	NaN	NaN	NaN	NaN	NaN	NaN	NaN	NaN	NaN	NaN	NaN	NaN	NaN	NaN	NaN	NaN	NaN	NaN	NaN	NaN	NaN	NaN	NaN	NaN	NaN	NaN
Q8IZP9;Q8IZP9-9;Q8IZP9-8;Q8IZP9-7;Q8IZP9-5;Q8IZP9-6;Q8IZP9-3;C9JWS0;Q8IZP9-4;Q8IZP9-2;Q14CE0	Q8IZP9;Q8IZP9-9;Q8IZP9-8;Q8IZP9-7;Q8IZP9-5;Q8IZP9-6;Q8IZP9-3;C9JWS0;Q8IZP9-4;Q8IZP9-2;Q14CE0	4;4;4;4;4;4;4;4;4;4;3	4;4;4;4;4;4;4;4;4;4;3	4;4;4;4;4;4;4;4;4;4;3	G-protein coupled receptor 64	GPR64	>sp|Q8IZP9|GPR64_HUMAN G-protein coupled receptor 64 OS=Homo sapiens GN=GPR64 PE=1 SV=2;>sp|Q8IZP9-9|GPR64_HUMAN Isoform 9 of G-protein coupled receptor 64 OS=Homo sapiens GN=GPR64;>sp|Q8IZP9-8|GPR64_HUMAN Isoform 8 of G-protein coupled receptor 64 OS=Homo	11	4	4	4	6.4	6.4	6.4	111.59	1017	1017;966;979;987;993;995;1001;1001;1003;1014;898	NaN	NaN	NaN	NaN	NaN	NaN	NaN	NaN	NaN	NaN	NaN	NaN	NaN	NaN	NaN	NaN	NaN	NaN	NaN	NaN	NaN	NaN	NaN	NaN	NaN	NaN	NaN	NaN	NaN	NaN	NaN	NaN
O00566;C9JX83	O00566;C9JX83	8;8	8;8	8;8	U3 small nucleolar ribonucleoprotein protein MPP10	MPHOSPH10	>sp|O00566|MPP10_HUMAN U3 small nucleolar ribonucleoprotein protein MPP10 OS=Homo sapiens GN=MPHOSPH10 PE=1 SV=2;>tr|C9JX83|C9JX83_HUMAN U3 small nucleolar ribonucleoprotein protein MPP10 OS=Homo sapiens GN=MPHOSPH10 PE=2 SV=1	2	8	8	8	15.6	15.6	15.6	78.863	681	681;541	NaN	NaN	1.5942	NaN	NaN	NaN	NaN	NaN	NaN	NaN	NaN	NaN	NaN	NaN	NaN	NaN	NaN	NaN	NaN	NaN	NaN	NaN	0.79143	NaN	NaN	NaN	1.1675	NaN	NaN	NaN	NaN	NaN
Q0VGL1;C9JXA7	Q0VGL1;C9JXA7	2;2	2;2	2;2	Ragulator complex protein LAMTOR4	LAMTOR4	>sp|Q0VGL1|LTOR4_HUMAN Ragulator complex protein LAMTOR4 OS=Homo sapiens GN=LAMTOR4 PE=1 SV=1;>tr|C9JXA7|C9JXA7_HUMAN Ragulator complex protein LAMTOR4 OS=Homo sapiens GN=LAMTOR4 PE=2 SV=1	2	2	2	2	17.2	17.2	17.2	10.741	99	99;137	NaN	NaN	NaN	NaN	NaN	NaN	NaN	NaN	NaN	NaN	NaN	NaN	NaN	NaN	NaN	NaN	NaN	NaN	NaN	NaN	NaN	NaN	NaN	NaN	NaN	NaN	NaN	NaN	NaN	NaN	NaN	NaN
P31350;C9JXC1;P31350-2	P31350;C9JXC1;P31350-2	4;4;4	4;4;4	3;3;3	Ribonucleoside-diphosphate reductase subunit M2	RRM2	>sp|P31350|RIR2_HUMAN Ribonucleoside-diphosphate reductase subunit M2 OS=Homo sapiens GN=RRM2 PE=1 SV=1;>tr|C9JXC1|C9JXC1_HUMAN Ribonucleoside-diphosphate reductase subunit M2 (Fragment) OS=Homo sapiens GN=RRM2 PE=2 SV=1;>sp|P31350-2|RIR2_HUMAN Isoform 2 o	3	4	4	3	14.1	14.1	10.3	44.877	389	389;289;449	NaN	NaN	NaN	NaN	NaN	NaN	NaN	NaN	NaN	NaN	NaN	NaN	NaN	NaN	NaN	NaN	NaN	NaN	NaN	NaN	NaN	NaN	NaN	NaN	NaN	NaN	NaN	NaN	NaN	NaN	NaN	NaN
Q9Y484;H0Y329;C9JYH8;G8JLI5;Q9Y484-3;Q9Y484-2;H7C5B4;H7C4N7;A6NM71	Q9Y484;H0Y329;C9JYH8;G8JLI5;Q9Y484-3;Q9Y484-2;H7C5B4;H7C4N7;A6NM71	2;2;2;2;2;2;1;1;1	2;2;2;2;2;2;1;1;1	2;2;2;2;2;2;1;1;1	WD repeat domain phosphoinositide-interacting protein 4	WDR45	>sp|Q9Y484|WIPI4_HUMAN WD repeat domain phosphoinositide-interacting protein 4 OS=Homo sapiens GN=WDR45 PE=2 SV=1;>tr|H0Y329|H0Y329_HUMAN WD repeat domain phosphoinositide-interacting protein 4 (Fragment) OS=Homo sapiens GN=WDR45 PE=4 SV=1;>tr|C9JYH8|C9JYH	9	2	2	2	5.6	5.6	5.6	39.867	360	360;287;325;346;361;371;81;118;292	NaN	NaN	NaN	NaN	NaN	NaN	NaN	NaN	NaN	NaN	NaN	NaN	NaN	NaN	NaN	NaN	NaN	NaN	NaN	NaN	NaN	NaN	NaN	NaN	NaN	NaN	NaN	NaN	NaN	NaN	NaN	NaN
O75817;C9JYM0	O75817;C9JYM0	3;3	3;3	3;3	Ribonuclease P protein subunit p20	POP7	>sp|O75817|POP7_HUMAN Ribonuclease P protein subunit p20 OS=Homo sapiens GN=POP7 PE=1 SV=2;>tr|C9JYM0|C9JYM0_HUMAN Ribonuclease P protein subunit p20 (Fragment) OS=Homo sapiens GN=POP7 PE=2 SV=1	2	3	3	3	25	25	25	15.651	140	140;137	NaN	NaN	NaN	NaN	NaN	NaN	NaN	NaN	NaN	NaN	NaN	NaN	NaN	NaN	NaN	NaN	NaN	NaN	NaN	NaN	NaN	NaN	NaN	NaN	NaN	NaN	NaN	NaN	NaN	NaN	NaN	NaN
O60716;O60716-3;O60716-13;O60716-11;O60716-10;O60716-9;O60716-5;C9JZR2;O60716-2;O60716-4;O60716-21;O60716-19;O60716-16;O60716-18;O60716-15;O60716-17;O60716-14;O60716-12;O60716-8;O60716-7;O60716-6;O60716-24;O60716-23;O60716-22;O60716-20;O60716-29;O60716-27;O60716-26;O60716-25;O60716-32;O60716-31;O60716-30;O60716-28;E9PRE2;E9PKY0;H0YC95;E9PKL1	O60716;O60716-3;O60716-13;O60716-11;O60716-10;O60716-9;O60716-5;C9JZR2;O60716-2;O60716-4;O60716-21;O60716-19;O60716-16;O60716-18;O60716-15;O60716-17;O60716-14;O60716-12;O60716-8;O60716-7;O60716-6;O60716-24;O60716-23;O60716-22;O60716-20;O60716-29;O60716-27;O60716-26;O60716-25;O60716-32;O60716-31;O60716-30;O60716-28	29;29;29;29;29;29;29;29;29;28;28;28;28;28;28;28;28;28;28;28;28;27;27;27;27;20;20;20;20;19;19;19;19;7;5;3;2	29;29;29;29;29;29;29;29;29;28;28;28;28;28;28;28;28;28;28;28;28;27;27;27;27;20;20;20;20;19;19;19;19;7;5;3;2	29;29;29;29;29;29;29;29;29;28;28;28;28;28;28;28;28;28;28;28;28;27;27;27;27;20;20;20;20;19;19;19;19;7;5;3;2	Catenin delta-1	CTNND1	>sp|O60716|CTND1_HUMAN Catenin delta-1 OS=Homo sapiens GN=CTNND1 PE=1 SV=1;>sp|O60716-3|CTND1_HUMAN Isoform 1AC of Catenin delta-1 OS=Homo sapiens GN=CTNND1;>sp|O60716-13|CTND1_HUMAN Isoform 2A of Catenin delta-1 OS=Homo sapiens GN=CTNND1;>sp|O60716-11|CTN	37	29	29	29	43	43	43	108.17	968	968;939;879;885;908;914;933;938;962;947;832;838;858;861;864;867;887;893;912;918;941;811;817;840;846;610;616;639;645;589;595;618;624;261;126;123;129	0.90746	1.1736	1.1716	1.1369	1.2272	1.0622	1.0533	0.96499	1.2311	1.0653	1.0033	1.0662	1.066	1.216	1.2126	1.0821	1.0325	0.98331	0.93247	1.3306	1.1441	1.0273	1.2054	1.2243	0.84245	1.1183	1.1004	1.1296	1.0332	1.1567	1.2643	1.2345
P62256;C9JZY6;H7C4M9;C9JZG9;P62256-2;C9J8Q9	P62256;C9JZY6;H7C4M9;C9JZG9;P62256-2;C9J8Q9	6;6;5;5;5;3	6;6;5;5;5;3	6;6;5;5;5;3	Ubiquitin-conjugating enzyme E2 H	UBE2H	>sp|P62256|UBE2H_HUMAN Ubiquitin-conjugating enzyme E2 H OS=Homo sapiens GN=UBE2H PE=1 SV=1;>tr|C9JZY6|C9JZY6_HUMAN Ubiquitin-conjugating enzyme E2 H (Fragment) OS=Homo sapiens GN=UBE2H PE=2 SV=1;>tr|H7C4M9|H7C4M9_HUMAN Ubiquitin-conjugating enzyme E2 H (F	6	6	6	6	31.7	31.7	31.7	20.655	183	183;123;62;103;152;149	0.98162	1.2177	1.3704	1.145	NaN	1.4241	1.2466	0.99129	1.1853	1.1855	1.1002	1.1869	1.3	1.358	1.8706	1.2633	1.1554	1.2971	0.97577	1.3156	1.1289	1.4396	1.3701	1.2857	NaN	1.0352	NaN	NaN	1.2762	NaN	1.2483	1.3296
Q7Z422;Q7Z422-4;Q7Z422-2;Q7Z422-3;C9K0U0	Q7Z422;Q7Z422-4;Q7Z422-2;Q7Z422-3;C9K0U0	2;2;2;2;2	2;2;2;2;2	2;2;2;2;2	SUZ domain-containing protein 1	SZRD1	>sp|Q7Z422|SZRD1_HUMAN SUZ domain-containing protein 1 OS=Homo sapiens GN=SZRD1 PE=1 SV=1;>sp|Q7Z422-4|SZRD1_HUMAN Isoform 4 of SUZ domain-containing protein 1 OS=Homo sapiens GN=SZRD1;>sp|Q7Z422-2|SZRD1_HUMAN Isoform 2 of SUZ domain-containing protein 1 O	5	2	2	2	17.8	17.8	17.8	16.997	152	152;133;132;134;151	NaN	NaN	NaN	NaN	NaN	NaN	NaN	NaN	NaN	NaN	NaN	NaN	NaN	NaN	NaN	NaN	NaN	NaN	NaN	NaN	NaN	NaN	NaN	NaN	NaN	NaN	NaN	NaN	NaN	NaN	NaN	NaN
O95149;H3BUB4;C9K0X5;H3BRI5	O95149;H3BUB4;C9K0X5;H3BRI5	4;4;4;2	4;4;4;2	4;4;4;2	Snurportin-1	SNUPN	>sp|O95149|SPN1_HUMAN Snurportin-1 OS=Homo sapiens GN=SNUPN PE=1 SV=1;>tr|H3BUB4|H3BUB4_HUMAN Snurportin-1 (Fragment) OS=Homo sapiens GN=SNUPN PE=2 SV=1;>tr|C9K0X5|C9K0X5_HUMAN Snurportin-1 OS=Homo sapiens GN=SNUPN PE=2 SV=1;>tr|H3BRI5|H3BRI5_HUMAN Snurpor	4	4	4	4	11.1	11.1	11.1	41.142	360	360;200;402;210	NaN	NaN	NaN	NaN	NaN	NaN	NaN	NaN	NaN	NaN	NaN	NaN	NaN	NaN	NaN	NaN	NaN	NaN	NaN	NaN	NaN	0.96416	NaN	NaN	NaN	NaN	NaN	NaN	NaN	1.2037	1.0679	NaN
CON__A2I7N0	CON__A2I7N0	11	3	1			>A2I7N0 TREMBL:A2I7N0;Q28922;Q3ZEJ6 (Bos taurus) SERPINA3-4	1	11	3	1	27.7	7.5	4.6	46.311	411	411	NaN	NaN	NaN	NaN	NaN	NaN	NaN	NaN	NaN	NaN	NaN	NaN	NaN	NaN	NaN	NaN	NaN	NaN	NaN	NaN	NaN	NaN	NaN	NaN	NaN	NaN	NaN	NaN	NaN	NaN	NaN	NaN
CON__A2I7N3	CON__A2I7N3	8	2	2			>A2I7N3 TREMBL:A2I7N3;Q27984 (Bos taurus) SERPINA3-7	1	8	2	2	16.5	4.6	4.6	46.941	417	417	NaN	NaN	1.3679	1.7979	1.5387	NaN	1.3688	1.2211	1.3932	1.9187	1.5167	1.3578	NaN	1.0146	1.3591	NaN	1.44	1.473	NaN	NaN	NaN	NaN	NaN	NaN	NaN	NaN	NaN	NaN	NaN	NaN	NaN	NaN
CON__ENSEMBL:ENSBTAP00000007350	CON__ENSEMBL:ENSBTAP00000007350	20	20	2			>ENSEMBL:ENSBTAP00000007350 (Bos taurus) similar to Complement C4-A precursor	1	20	20	2	14.6	14.6	2	192.99	1742	1742	NaN	NaN	1.4208	NaN	NaN	NaN	NaN	NaN	NaN	NaN	0.65709	NaN	NaN	NaN	NaN	NaN	NaN	NaN	NaN	NaN	NaN	NaN	NaN	NaN	NaN	NaN	NaN	NaN	NaN	NaN	NaN	NaN
CON__ENSEMBL:ENSBTAP00000014147	CON__ENSEMBL:ENSBTAP00000014147	2	2	2			>ENSEMBL:ENSBTAP00000014147 (Bos taurus) 12 kDa protein	1	2	2	2	27.4	27.4	27.4	11.756	113	113	NaN	NaN	NaN	NaN	NaN	NaN	NaN	NaN	NaN	NaN	NaN	NaN	NaN	NaN	NaN	NaN	NaN	NaN	NaN	NaN	NaN	NaN	NaN	NaN	NaN	NaN	NaN	NaN	NaN	NaN	NaN	NaN
CON__ENSEMBL:ENSBTAP00000016046	CON__ENSEMBL:ENSBTAP00000016046	11	6	6			>ENSEMBL:ENSBTAP00000016046 (Bos taurus) similar to fibulin-1 C isoform 1	1	11	6	6	29.7	21	21	77.456	706	706	NaN	NaN	NaN	NaN	NaN	NaN	NaN	NaN	NaN	NaN	NaN	NaN	NaN	NaN	NaN	NaN	NaN	NaN	NaN	NaN	NaN	NaN	NaN	NaN	NaN	NaN	NaN	NaN	NaN	NaN	NaN	NaN
CON__ENSEMBL:ENSBTAP00000018229;P02774;P02774-3;P02774-2;D6RBJ7;D6RF20	CON__ENSEMBL:ENSBTAP00000018229	19;5;5;4;3;1	19;5;5;4;3;1	3;0;0;0;0;0			>ENSEMBL:ENSBTAP00000018229 (Bos taurus) 54 kDa protein	6	19	19	3	45.7	45.7	6.3	53.661	475	475;474;493;352;348;145	1.0294	1.9551	1.9702	1.8453	1.3981	1.8433	1.2789	1.1931	1.7356	2.0942	1.2684	1.6171	1.192	1.5285	1.5096	1.7813	1.9297	1.3994	0.88762	1.9621	2.5456	1.3736	2.1195	2.0208	0.82561	1.6328	1.7613	1.3672	1.84	1.7103	2.1085	2.3213
CON__ENSEMBL:ENSBTAP00000018574;P05546	CON__ENSEMBL:ENSBTAP00000018574	9;1	9;1	9;1			>ENSEMBL:ENSBTAP00000018574 (Bos taurus) 55 kDa protein	2	9	9	9	21.6	21.6	21.6	55.207	496	496;499	NaN	1.9341	NaN	2.0635	NaN	NaN	1.0076	1.8791	1.6189	NaN	NaN	NaN	NaN	NaN	NaN	0.93497	NaN	NaN	NaN	NaN	1.7356	NaN	NaN	NaN	NaN	NaN	NaN	NaN	NaN	NaN	NaN	NaN
CON__ENSEMBL:ENSBTAP00000024146;H0YGH6;F5GXY0	CON__ENSEMBL:ENSBTAP00000024146	55;3;1	55;3;1	47;0;0			>ENSEMBL:ENSBTAP00000024146 (Bos taurus) similar to alpha-2-macroglobulin isoform 1	3	55	55	47	48.1	48.1	43.4	164.34	1477	1477;200;144	0.74202	1.4538	1.6269	1.508	1.4469	1.4969	1.1735	1.2751	1.4928	1.8554	1.1216	1.4465	0.96714	1.1418	1.3204	1.4985	1.336	1.0473	0.93327	1.7236	2.3054	1.1734	1.679	1.896	0.74684	1.6618	1.4653	1.2952	1.7115	1.5716	1.7824	2.0036
CON__ENSEMBL:ENSBTAP00000024466;CON__ENSEMBL:ENSBTAP00000024462	CON__ENSEMBL:ENSBTAP00000024466;CON__ENSEMBL:ENSBTAP00000024462	4;4	4;4	4;4			>ENSEMBL:ENSBTAP00000024466 (Bos taurus) 44 kDa protein;>ENSEMBL:ENSBTAP00000024462 (Bos taurus) 47 kDa protein	2	4	4	4	18	18	18	43.9	401	401;419	NaN	NaN	NaN	NaN	NaN	NaN	NaN	NaN	NaN	NaN	NaN	NaN	NaN	NaN	NaN	NaN	NaN	NaN	NaN	NaN	NaN	NaN	NaN	NaN	NaN	NaN	NaN	NaN	NaN	NaN	NaN	NaN
CON__ENSEMBL:ENSBTAP00000025008;Q9H4B7	CON__ENSEMBL:ENSBTAP00000025008;Q9H4B7	8;6	2;0	2;0	Tubulin beta-1 chain	TUBB1	>ENSEMBL:ENSBTAP00000025008 (Bos taurus) hypothetical protein;>sp|Q9H4B7|TBB1_HUMAN Tubulin beta-1 chain OS=Homo sapiens GN=TUBB1 PE=1 SV=1	2	8	2	2	14.2	7.1	7.1	59.299	536	536;451	NaN	NaN	NaN	NaN	NaN	NaN	NaN	NaN	NaN	NaN	NaN	NaN	NaN	NaN	NaN	NaN	NaN	NaN	NaN	NaN	NaN	NaN	NaN	NaN	NaN	NaN	NaN	NaN	NaN	NaN	NaN	NaN
CON__ENSEMBL:ENSBTAP00000032840	CON__ENSEMBL:ENSBTAP00000032840	14	14	14			>ENSEMBL:ENSBTAP00000032840 (Bos taurus) similar to apolipoprotein B, partial	1	14	14	14	21.7	21.7	21.7	92.273	825	825	NaN	NaN	NaN	NaN	NaN	NaN	NaN	NaN	NaN	NaN	NaN	NaN	NaN	NaN	NaN	NaN	NaN	NaN	NaN	NaN	NaN	NaN	NaN	NaN	NaN	NaN	NaN	NaN	NaN	NaN	NaN	NaN
CON__ENSEMBL:ENSBTAP00000034412	CON__ENSEMBL:ENSBTAP00000034412	10	10	10			>ENSEMBL:ENSBTAP00000034412 (Bos taurus) similar to C4b-binding protein alpha chain	1	10	10	10	48.2	48.2	48.2	22.336	199	199	0.94294	0.68294	0.9203	0.93403	NaN	0.85427	0.77106	0.77236	0.74898	0.90184	1.098	0.97392	1.0354	1.0997	NaN	NaN	NaN	NaN	1.0684	NaN	1.2261	1.0927	1.1426	1.0298	0.87409	1.0232	NaN	1.0539	0.79124	0.95171	0.84169	0.9856
CON__ENSEMBL:ENSBTAP00000037665	CON__ENSEMBL:ENSBTAP00000037665	4	4	4			>ENSEMBL:ENSBTAP00000037665 (Bos taurus) similar to Pregnancy zone protein, partial	1	4	4	4	10.6	10.6	10.6	65.19	578	578	NaN	NaN	NaN	NaN	NaN	NaN	NaN	NaN	NaN	NaN	NaN	NaN	NaN	NaN	NaN	NaN	NaN	NaN	NaN	NaN	NaN	NaN	NaN	NaN	NaN	NaN	NaN	NaN	NaN	NaN	NaN	NaN
CON__ENSEMBL:ENSBTAP00000038329	CON__ENSEMBL:ENSBTAP00000038329	2	1	1			>ENSEMBL:ENSBTAP00000038329 (Bos taurus) 9 kDa protein	1	2	1	1	27.5	15	15	8.5787	80	80	NaN	NaN	NaN	NaN	NaN	NaN	NaN	NaN	NaN	NaN	NaN	NaN	NaN	NaN	NaN	NaN	NaN	NaN	NaN	NaN	NaN	NaN	NaN	NaN	NaN	NaN	NaN	NaN	NaN	NaN	NaN	NaN
CON__H-INV:HIT000292931	CON__H-INV:HIT000292931	26	1	1			>H-INV:HIT000292931 Tax_Id=9606 Gene_Symbol=- Similar to Keratin, type II cytoskeletal 8	1	26	1	1	42	2.5	2.5	49.448	443	443	NaN	NaN	NaN	NaN	NaN	NaN	NaN	NaN	NaN	NaN	NaN	NaN	NaN	NaN	NaN	NaN	NaN	NaN	NaN	NaN	NaN	NaN	NaN	NaN	NaN	NaN	NaN	NaN	NaN	NaN	NaN	NaN
CON__P00735	CON__P00735	19	19	17			>P00735 SWISS-PROT:P00735 (Bos taurus) Prothrombin precursor (Fragment)	1	19	19	17	43.8	43.8	40	70.505	625	625	0.94858	1.3462	NaN	1.2224	1.3244	NaN	1.279	1.2765	1.4286	1.2772	1.1034	NaN	0.93814	NaN	NaN	NaN	1.3854	NaN	0.73825	NaN	1.6009	1.1204	1.1674	1.6208	NaN	NaN	NaN	2.0456	1.5544	1.2352	1.224	1.4757
CON__P00761	CON__P00761	6	6	6			>P00761 SWISS-PROT:P00761|TRYP_PIG Trypsin - Sus scrofa (Pig).	1	6	6	6	25.1	25.1	25.1	24.409	231	231	0.76222	0.82142	0.82174	0.75032	0.8878	0.90989	1.0994	0.90794	0.85922	0.82093	0.90196	0.78241	0.83039	0.94021	0.90011	0.8205	0.81563	0.9608	0.81075	0.86015	0.90334	0.91653	1.0325	0.99779	0.7389	0.93787	0.9141	0.87294	0.91112	0.94075	0.89162	0.79029
CON__P00978	CON__P00978	6	6	6			>P00978 SWISS-PROT:P00978 (Bos taurus) AMBP protein precursor	1	6	6	6	23.3	23.3	23.3	39.234	352	352	1.2629	1.7134	1.7147	NaN	NaN	1.7666	NaN	NaN	1.4355	1.9815	NaN	1.5656	NaN	NaN	1.6633	1.4485	1.3858	1.2648	1.0621	1.5997	2.1961	1.1237	1.8225	1.8187	0.88746	1.5494	1.5726	NaN	1.9078	1.7833	1.6848	1.8987
CON__P01030	CON__P01030	19	1	1			>P01030 SWISS-PROT:P01030 (Bos taurus) similar to Complement C4-A precursor	1	19	1	1	13.6	0.9	0.9	192.79	1741	1741	NaN	NaN	NaN	NaN	NaN	NaN	NaN	NaN	NaN	NaN	NaN	NaN	NaN	NaN	NaN	NaN	NaN	NaN	NaN	NaN	NaN	NaN	NaN	NaN	NaN	NaN	NaN	NaN	NaN	NaN	NaN	NaN
CON__P01044-1;CON__Q2KJ62	CON__P01044-1;CON__Q2KJ62	14;13	14;13	5;5			>P01044-1 SWISS-PROT:P01044-1 (Bos taurus) Isoform HMW of Kininogen-1 precursor;>Q2KJ62 TREMBL:Q2KJ62 (Bos taurus) KNG protein	2	14	14	5	24.3	24.3	11.3	68.889	621	621;621	NaN	1.2133	NaN	1.8796	NaN	1.5027	1.4493	1.6747	NaN	NaN	1.3228	NaN	1.0094	1.0564	1.2117	NaN	1.1139	1.3866	0.95097	1.4468	2.135	1.0181	1.6555	1.6663	0.84607	1.3794	1.4424	0.87043	1.6669	1.7404	1.6775	1.9605
CON__P01045-1	CON__P01045-1	11	2	2			>P01045-1 SWISS-PROT:P01045-1 (Bos taurus) Isoform HMW of Kininogen-2 precursor	1	11	2	2	18.1	3.7	3.7	68.709	619	619	NaN	NaN	NaN	NaN	NaN	NaN	NaN	NaN	NaN	NaN	NaN	NaN	NaN	NaN	NaN	NaN	NaN	NaN	NaN	NaN	NaN	NaN	NaN	NaN	NaN	NaN	NaN	NaN	NaN	NaN	NaN	NaN
CON__P01966;P02008	CON__P01966	9;1	9;1	5;0			>P01966 SWISS-PROT:P01966 (Bos taurus) Hemoglobin subunit alpha	2	9	9	5	83.1	83.1	59.2	15.184	142	142;142	0.99521	1.168	1.2487	1.1826	1.2431	1.2572	1.0514	1.0927	1.3001	1.2885	1.1004	1.1496	1.0437	1.1813	1.2752	1.2572	1.2798	1.1738	1.0462	1.377	1.4644	1.0912	1.3507	1.4208	0.78055	1.2105	1.1693	1.186	1.5202	1.2527	1.3251	1.4888
CON__P02070	CON__P02070	8	4	4			>P02070 SWISS-PROT:P02070 (Bos taurus) Hemoglobin subunit beta	1	8	4	4	62.8	38.6	38.6	15.954	145	145	NaN	NaN	NaN	NaN	NaN	NaN	NaN	NaN	NaN	NaN	NaN	NaN	NaN	NaN	NaN	NaN	NaN	NaN	NaN	NaN	NaN	NaN	NaN	NaN	NaN	NaN	NaN	1.7547	1.6506	NaN	1.23	NaN
P02538;CON__P02538;P48668;CON__P48668;Q01546;CON__Q01546;H0YID6;H0YIN9	P02538;CON__P02538;P48668;CON__P48668	20;20;18;18;4;4;1;1	14;14;12;12;1;1;1;1	3;3;1;1;0;0;0;0	Keratin, type II cytoskeletal 6A;Keratin, type II cytoskeletal 6C	KRT6A;KRT6C	>sp|P02538|K2C6A_HUMAN Keratin, type II cytoskeletal 6A OS=Homo sapiens GN=KRT6A PE=1 SV=3;>P02538 SWISS-PROT:P02538 Tax_Id=9606 Gene_Symbol=KRT6A Keratin, type II cytoskeletal 6A;>sp|P48668|K2C6C_HUMAN Keratin, type II cytoskeletal 6C OS=Homo sapiens GN=K	8	20	14	3	36.5	30.3	6.6	60.044	564	564;564;564;564;638;638;119;196	NaN	NaN	NaN	NaN	NaN	NaN	NaN	NaN	NaN	NaN	NaN	NaN	NaN	NaN	NaN	NaN	NaN	NaN	NaN	NaN	NaN	NaN	NaN	NaN	NaN	NaN	NaN	NaN	NaN	NaN	NaN	NaN
CON__P02584	CON__P02584	8	1	1			>P02584 SWISS-PROT:P02584 (Bos taurus) Profilin-1	1	8	1	1	54.3	12.1	12.1	15.057	140	140	NaN	NaN	NaN	NaN	NaN	NaN	NaN	NaN	NaN	NaN	NaN	NaN	NaN	NaN	NaN	NaN	NaN	NaN	NaN	NaN	NaN	NaN	NaN	NaN	NaN	NaN	NaN	NaN	NaN	NaN	NaN	NaN
CON__P02672	CON__P02672	4	4	4			>P02672 SWISS-PROT:P02672 (Bos taurus) Fibrinogen alpha chain precursor	1	4	4	4	8.5	8.5	8.5	67.011	615	615	NaN	NaN	NaN	NaN	NaN	NaN	NaN	NaN	NaN	NaN	NaN	NaN	NaN	NaN	NaN	NaN	NaN	NaN	NaN	NaN	NaN	NaN	NaN	NaN	NaN	NaN	NaN	NaN	NaN	NaN	NaN	NaN
P02768;CON__P02768-1;H0YA55;P02768-2;C9JKR2;D6RHD5;B7WNR0;H7C013	P02768;CON__P02768-1;H0YA55;P02768-2;C9JKR2;D6RHD5;B7WNR0	11;11;9;8;8;8;8;3	5;5;3;3;3;3;3;2	5;5;3;3;3;3;3;2	Serum albumin	ALB	>sp|P02768|ALBU_HUMAN Serum albumin OS=Homo sapiens GN=ALB PE=1 SV=2;>P02768-1 SWISS-PROT:P02768-1 Tax_Id=9606 Gene_Symbol=ALB Isoform 1 of Serum albumin precursor;>tr|H0YA55|H0YA55_HUMAN Serum albumin (Fragment) OS=Homo sapiens GN=ALB PE=4 SV=1;>sp|P02768	8	11	5	5	19.2	12.5	12.5	69.366	609	609;609;454;417;417;459;494;197	NaN	NaN	NaN	NaN	NaN	NaN	NaN	NaN	NaN	NaN	NaN	NaN	NaN	NaN	NaN	NaN	NaN	NaN	NaN	NaN	NaN	NaN	NaN	NaN	NaN	NaN	NaN	NaN	NaN	NaN	1.1391	NaN
CON__P02769	CON__P02769	55	55	49			>P02769 SWISS-PROT:P02769 (Bos taurus) Bovine serum albumin precursor	1	55	55	49	78.1	78.1	72.8	69.293	607	607	0.95631	1.6743	1.6735	1.6978	1.4829	1.6969	1.1827	1.3928	1.6404	2.0411	1.1022	1.4926	1.0145	1.2661	1.4065	1.5781	1.6518	1.2394	0.9466	1.9525	2.7611	1.212	1.8751	2.0966	0.84604	1.8165	1.6522	1.4934	2.0664	1.6763	2.0242	2.3259
CON__P02777	CON__P02777	2	2	2			>P02777 SWISS-PROT:P02777 (Bos taurus) similar to Platelet factor 4	1	2	2	2	15.2	15.2	15.2	24.241	230	230	NaN	NaN	NaN	NaN	NaN	NaN	NaN	NaN	NaN	NaN	NaN	NaN	NaN	NaN	NaN	NaN	NaN	NaN	NaN	NaN	NaN	NaN	NaN	NaN	NaN	NaN	NaN	NaN	NaN	NaN	NaN	NaN
CON__P04258	CON__P04258	1	1	1			>P04258 SWISS-PROT:P04258 (Bos taurus) Similar to Collagen alpha 1(III) chain	1	1	1	1	1.4	1.4	1.4	138.44	1466	1466	NaN	NaN	NaN	NaN	NaN	NaN	NaN	NaN	NaN	NaN	NaN	NaN	NaN	NaN	NaN	NaN	NaN	NaN	NaN	NaN	NaN	NaN	NaN	NaN	NaN	NaN	NaN	NaN	NaN	NaN	NaN	NaN
CON__P04259;P04259	CON__P04259;P04259	18;17	1;1	1;1	Keratin, type II cytoskeletal 6B	KRT6B	>P04259 SWISS-PROT:P04259 Tax_Id=9606 Gene_Symbol=KRT6B Keratin, type II cytoskeletal 6B;>sp|P04259|K2C6B_HUMAN Keratin, type II cytoskeletal 6B OS=Homo sapiens GN=KRT6B PE=1 SV=5	2	18	1	1	33	3	3	59.998	564	564;564	NaN	NaN	NaN	NaN	NaN	NaN	NaN	NaN	NaN	NaN	NaN	NaN	NaN	NaN	NaN	NaN	NaN	NaN	NaN	NaN	NaN	NaN	NaN	NaN	NaN	NaN	NaN	NaN	NaN	NaN	NaN	NaN
P04264;CON__P04264;CON__ENSEMBL:ENSBTAP00000038253	P04264;CON__P04264	8;8;2	5;5;2	3;3;1	Keratin, type II cytoskeletal 1	KRT1	>sp|P04264|K2C1_HUMAN Keratin, type II cytoskeletal 1 OS=Homo sapiens GN=KRT1 PE=1 SV=6;>P04264 SWISS-PROT:P04264 Tax_Id=9606 Gene_Symbol=KRT1 Keratin, type II cytoskeletal 1	3	8	5	3	11.5	8.1	5	66.038	644	644;644;606	NaN	1.5689	NaN	1.441	NaN	1.4555	1.5769	NaN	NaN	NaN	NaN	NaN	1.4807	NaN	NaN	1.4249	1.5125	1.6532	NaN	NaN	NaN	NaN	NaN	NaN	NaN	2.5221	1.9258	3.0312	NaN	1.6931	NaN	NaN
CON__P05784	CON__P05784	18	3	3			>P05784 SWISS-PROT:P05784 Tax_Id=10090 Gene_Symbol=Krt18 Keratin, type I cytoskeletal 18	1	18	3	3	27.2	9.2	9.2	47.538	423	423	NaN	NaN	NaN	NaN	NaN	NaN	NaN	NaN	NaN	NaN	NaN	NaN	NaN	NaN	NaN	NaN	NaN	NaN	NaN	NaN	NaN	NaN	NaN	NaN	NaN	NaN	NaN	NaN	NaN	NaN	1.7655	NaN
P05787;CON__P05787;P05787-2;F8VU64;F8VUG2;F8VP67;F8VRG4;CON__H-INV:HIT000016045;H0YIB2;F8VVA1;F8VQY3	P05787;CON__P05787;P05787-2;F8VU64;F8VUG2	47;47;47;35;27;18;11;6;4;1;1	44;44;44;33;25;18;9;6;4;1;1	7;7;7;4;1;0;0;0;1;0;0	Keratin, type II cytoskeletal 8	KRT8	>sp|P05787|K2C8_HUMAN Keratin, type II cytoskeletal 8 OS=Homo sapiens GN=KRT8 PE=1 SV=7;>P05787 SWISS-PROT:P05787 Tax_Id=9606 Gene_Symbol=KRT8 Keratin, type II cytoskeletal 8;>sp|P05787-2|K2C8_HUMAN Isoform 2 of Keratin, type II cytoskeletal 8 OS=Homo sapi	11	47	44	7	70.4	68.5	26.9	53.704	483	483;483;511;329;273;113;177;99;83;107;180	0.91742	1.1166	1.1477	1.1372	1.1758	1.1303	1.0503	1.0854	1.1102	1.1511	1.0772	1.1538	1.066	1.1128	1.275	1.0484	1.1158	1.0675	0.94919	1.2281	1.1976	1.1102	1.2389	1.2033	0.91466	1.1312	1.1392	1.1056	1.1533	1.1192	1.1369	1.1749
CON__P06868;P00747	CON__P06868	40;4	40;4	40;4			>P06868 SWISS-PROT:P06868 (Bos taurus) Plasminogen precursor	2	40	40	40	65.3	65.3	65.3	91.215	812	812;810	NaN	1.158	1.0826	1.4244	1.317	1.4045	1.009	1.0859	1.2806	1.315	1.0525	NaN	NaN	0.75806	1.1953	1.0747	NaN	0.96589	1.0265	1.1635	1.2768	0.92751	0.90123	1.3441	0.81206	1.137	1.1471	1.1428	1.2173	1.0674	1.1066	1.1869
CON__P07224	CON__P07224	5	5	5			>P07224 SWISS-PROT:P07224 (Bos taurus) Vitamin K-dependent protein S precursor	1	5	5	5	9.3	9.3	9.3	75.132	675	675	NaN	NaN	NaN	NaN	NaN	NaN	NaN	NaN	NaN	NaN	NaN	NaN	NaN	NaN	NaN	NaN	NaN	NaN	NaN	NaN	NaN	NaN	NaN	NaN	NaN	NaN	NaN	NaN	NaN	NaN	NaN	NaN
CON__P08729	CON__P08729	38	33	1			>P08729 SWISS-PROT:P08729 Tax_Id=9606 Gene_Symbol=KRT7 Keratin, type II cytoskeletal 7	1	38	33	1	67.8	60.1	2.1	51.417	469	469	0.95593	1.0552	1.0257	1.0183	1.1005	1.0475	1.0002	1.0501	1.1061	1.02	1.0652	1.0724	1.0518	1.0813	1.1361	1.0155	0.96766	1.0258	1.0328	1.144	1.0266	0.99156	1.1338	1.0437	0.80568	1.0632	0.9933	1.0745	1.0539	1.0306	1.0823	1.131
CON__P12763	CON__P12763	13	13	10			>P12763 SWISS-PROT:P12763 (Bos taurus) Alpha-2-HS-glycoprotein precursor	1	13	13	10	51	51	45.4	38.418	359	359	0.8973	1.4822	1.5353	1.6276	1.3587	1.5533	1.1351	1.3597	1.4623	1.9407	1.1234	1.371	0.96365	1.3047	1.2503	1.3941	1.4299	1.1457	1.0087	1.4655	2.2302	0.96937	1.5458	1.756	0.74178	1.6606	1.5003	1.0755	1.7277	1.5651	1.7659	1.8135
P13645;CON__P13645;CON__P02535-1	P13645;CON__P13645	9;9;4	7;7;3	6;6;2	Keratin, type I cytoskeletal 10	KRT10	>sp|P13645|K1C10_HUMAN Keratin, type I cytoskeletal 10 OS=Homo sapiens GN=KRT10 PE=1 SV=6;>P13645 SWISS-PROT:P13645 Tax_Id=9606 Gene_Symbol=KRT10 Keratin, type I cytoskeletal 10	3	9	7	6	18	15.6	13.5	58.826	584	584;593;570	NaN	NaN	NaN	NaN	NaN	NaN	NaN	NaN	NaN	NaN	NaN	NaN	NaN	NaN	NaN	NaN	NaN	NaN	NaN	NaN	NaN	NaN	NaN	NaN	NaN	NaN	NaN	NaN	NaN	NaN	NaN	NaN
CON__P15497	CON__P15497	18	18	17			>P15497 SWISS-PROT:P15497 (Bos taurus) Apolipoprotein A-I precursor	1	18	18	17	59.6	59.6	59.6	30.276	265	265	0.97784	1.4644	1.6436	1.5709	1.3896	1.7439	1.1675	1.3553	1.6776	1.853	1.1595	1.4075	1.0804	1.3157	1.3147	1.4791	1.4606	1.2873	1.0069	1.5826	1.9723	1.0521	1.5692	1.6531	0.80483	1.3314	1.3432	1.2176	1.559	1.4044	1.6312	1.6939
CON__P15636	CON__P15636	15	15	15			>P15636 SWISS-PROT:P15636 Protease I precursor Lysyl endopeptidase Achromobacter lyticus.	1	15	15	15	25.4	25.4	25.4	68.124	653	653	0.918	1.0336	1.0448	1.0225	1.045	0.96781	1.0122	0.9488	1.0595	1.0404	1.011	0.96861	1.0777	1.0256	1.1254	1.0993	1.0057	1.0461	0.96293	1.2907	1.2084	1.2229	1.2385	1.2349	1.0779	1.2212	1.207	1.1938	1.2223	1.07	1.215	1.2415
CON__P17690;J3KS17	CON__P17690	15;2	15;2	13;0			>P17690 SWISS-PROT:P17690 (Bos taurus) Beta-2-glycoprotein 1 precursor	2	15	15	13	52.2	52.2	47	38.252	345	345;104	0.91273	1.0111	1.2237	0.89323	0.81263	1.3007	0.95445	0.88303	1.1037	1.3591	1.0909	1.1372	0.93953	0.94113	1.1651	1.1289	1.2562	1.1155	1.0717	1.1959	1.324	0.85846	1.1465	1.4115	0.75506	1.0372	1.2336	1.1533	1.1089	1.1143	1.1112	1.287
CON__P17697	CON__P17697	5	5	5			>P17697 SWISS-PROT:P17697 (Bos taurus) Clusterin precursor	1	5	5	5	13.9	13.9	13.9	51.113	439	439	NaN	NaN	NaN	NaN	NaN	NaN	NaN	NaN	NaN	NaN	NaN	NaN	NaN	NaN	NaN	NaN	NaN	NaN	NaN	NaN	NaN	NaN	NaN	NaN	NaN	NaN	NaN	NaN	NaN	NaN	NaN	NaN
CON__P21752	CON__P21752	2	1	1			>P21752 SWISS-PROT:P21752 (Bos taurus) Thymosin beta-9	1	2	1	1	64.3	33.3	33.3	4.8054	42	42	NaN	NaN	NaN	NaN	NaN	NaN	NaN	NaN	NaN	NaN	NaN	NaN	NaN	NaN	NaN	NaN	NaN	NaN	NaN	NaN	NaN	NaN	NaN	NaN	NaN	NaN	NaN	NaN	NaN	NaN	NaN	NaN
CON__P28800;C9JMH6	CON__P28800	7;2	7;2	5;0			>P28800 SWISS-PROT:P28800 (Bos taurus) Alpha-2-antiplasmin precursor	2	7	7	5	15.9	15.9	9.8	54.71	492	492;255	NaN	NaN	NaN	NaN	NaN	NaN	NaN	1.678	NaN	NaN	NaN	NaN	NaN	NaN	NaN	NaN	NaN	NaN	1.0247	NaN	2.3929	1.1659	1.6117	1.6462	NaN	1.9447	1.424	NaN	1.8091	1.6508	1.8323	NaN
CON__P34955	CON__P34955	22	22	22			>P34955 SWISS-PROT:P34955 (Bos taurus) Alpha-1-antiproteinase precursor	1	22	22	22	42.3	42.3	42.3	46.103	416	416	0.91277	1.5258	1.537	1.5091	1.4188	1.5952	1.1135	1.1545	1.3692	1.7483	0.98049	1.4507	0.91982	1.1517	1.359	1.4662	1.5162	1.1452	0.88226	1.7152	2.528	1.152	1.7959	2.036	0.7585	1.6821	1.6327	1.4515	1.887	1.4958	1.8937	1.9219
P35908;CON__P35908	P35908;CON__P35908	7;7	2;2	2;2	Keratin, type II cytoskeletal 2 epidermal	KRT2	>sp|P35908|K22E_HUMAN Keratin, type II cytoskeletal 2 epidermal OS=Homo sapiens GN=KRT2 PE=1 SV=2;>P35908 SWISS-PROT:P35908 Tax_Id=9606 Gene_Symbol=KRT2 Keratin, type II cytoskeletal 2 epidermal	2	7	2	2	11.7	3.8	3.8	65.432	639	639;645	NaN	NaN	NaN	NaN	NaN	NaN	NaN	NaN	NaN	NaN	NaN	NaN	NaN	NaN	NaN	NaN	NaN	NaN	NaN	NaN	NaN	NaN	NaN	NaN	NaN	NaN	NaN	NaN	NaN	NaN	NaN	NaN
CON__P41361;P01008	CON__P41361	7;2	7;2	7;2			>P41361 SWISS-PROT:P41361 (Bos taurus) Antithrombin-III precursor	2	7	7	7	18.1	18.1	18.1	52.347	465	465;464	NaN	1.9185	NaN	NaN	NaN	NaN	NaN	NaN	NaN	NaN	NaN	1.6009	NaN	1.6819	1.6493	NaN	2.4551	1.7031	NaN	2.1093	1.9247	1.3559	2.1507	NaN	NaN	1.7	1.5523	1.3019	1.9698	1.3476	NaN	2.2097
CON__P50446	CON__P50446	10	2	0			>P50446 SWISS-PROT:P50446 Tax_Id=10090 Gene_Symbol=Krt6a Keratin, type II cytoskeletal 6A	1	10	2	0	16.5	3.6	0	59.334	553	553	NaN	NaN	NaN	NaN	NaN	NaN	NaN	NaN	NaN	NaN	NaN	NaN	NaN	NaN	NaN	NaN	NaN	NaN	NaN	NaN	NaN	NaN	NaN	NaN	NaN	NaN	NaN	NaN	NaN	NaN	NaN	NaN
CON__P50448;P05155;B4E1H2;H9KV48;B4E1F0;E9PGN7	CON__P50448	4;1;1;1;1;1	4;1;1;1;1;1	4;1;1;1;1;1			>P50448 SWISS-PROT:P50448 (Bos taurus) Factor XIIa inhibitor precursor	6	4	4	4	10.5	10.5	10.5	51.723	468	468;500;448;463;505;543	NaN	NaN	NaN	NaN	NaN	NaN	NaN	NaN	NaN	2.019	NaN	NaN	NaN	NaN	NaN	NaN	NaN	NaN	NaN	NaN	NaN	NaN	NaN	NaN	NaN	NaN	NaN	NaN	NaN	NaN	NaN	NaN
P78386;CON__P78386;O43790;P78385;CON__O43790;CON__Q6NT21;CON__P78385;CON__Q14533;Q14533;F5GYI5;Q9NSB4;A6NCN2;CON__Q9NSB4	P78386;CON__P78386;O43790;P78385;CON__O43790;CON__Q6NT21;CON__P78385;CON__Q14533	7;7;4;4;4;4;4;4;3;2;1;1;1	4;4;1;1;1;1;1;1;0;1;0;1;0	4;4;1;1;1;1;1;1;0;1;0;1;0	Keratin, type II cuticular Hb5;Keratin, type II cuticular Hb6;Keratin, type II cuticular Hb3	KRT85;KRT86;KRT83	>sp|P78386|KRT85_HUMAN Keratin, type II cuticular Hb5 OS=Homo sapiens GN=KRT85 PE=1 SV=1;>P78386 SWISS-PROT:P78386 Keratin, type II cuticular Hb5 (Hair keratin, type II Hb5) - Homo sapiens (Human).;>sp|O43790|KRT86_HUMAN Keratin, type II cuticular Hb6 OS=H	13	7	4	4	9.5	5.5	5.5	55.802	507	507;507;486;493;486;493;493;505;505;295;513;255;513	NaN	NaN	NaN	NaN	NaN	NaN	NaN	NaN	NaN	NaN	NaN	NaN	NaN	NaN	NaN	NaN	NaN	NaN	NaN	NaN	NaN	NaN	NaN	NaN	NaN	NaN	NaN	NaN	NaN	NaN	NaN	NaN
CON__P81644	CON__P81644	2	2	2			>P81644 SWISS-PROT:P81644 (Bos taurus) Apolipoprotein A-II precursor	1	2	2	2	11	11	11	11.202	100	100	0.81983	1.291	NaN	NaN	NaN	1.843	0.99156	0.93949	NaN	NaN	NaN	NaN	NaN	1.0259	NaN	NaN	1.3173	NaN	NaN	1.5898	NaN	NaN	NaN	NaN	NaN	NaN	NaN	1.1747	NaN	1.1883	1.186	1.4229
CON__Q03247;P02649	CON__Q03247	8;1	8;1	8;1			>Q03247 SWISS-PROT:Q03247 (Bos taurus) Apolipoprotein E precursor	2	8	8	8	30.7	30.7	30.7	35.979	316	316;317	NaN	NaN	NaN	NaN	NaN	NaN	NaN	NaN	NaN	NaN	NaN	NaN	NaN	NaN	NaN	NaN	NaN	NaN	NaN	NaN	NaN	NaN	NaN	NaN	NaN	NaN	NaN	NaN	NaN	NaN	NaN	NaN
Q04695;CON__Q04695;K7EPJ9	Q04695;CON__Q04695;K7EPJ9	31;31;17	9;9;8	4;4;4	Keratin, type I cytoskeletal 17	KRT17	>sp|Q04695|K1C17_HUMAN Keratin, type I cytoskeletal 17 OS=Homo sapiens GN=KRT17 PE=1 SV=2;>Q04695 SWISS-PROT:Q04695 Tax_Id=9606 Gene_Symbol=KRT17 Keratin, type I cytoskeletal 17;>tr|K7EPJ9|K7EPJ9_HUMAN Keratin, type I cytoskeletal 17 (Fragment) OS=Homo sap	3	31	9	4	69.2	26.4	16.2	48.105	432	432;432;231	NaN	NaN	NaN	NaN	NaN	NaN	NaN	1.0788	NaN	NaN	1.0291	NaN	NaN	NaN	NaN	NaN	0.88036	NaN	1.0861	NaN	0.9773	1.0242	1.1435	0.9138	NaN	NaN	NaN	NaN	NaN	2.2414	1.0317	0.97092
CON__Q05443	CON__Q05443	3	3	1			>Q05443 SWISS-PROT:Q05443 (Bos taurus) Lumican precursor	1	3	3	1	8.2	8.2	2.6	38.756	342	342	NaN	NaN	NaN	NaN	NaN	NaN	NaN	NaN	NaN	NaN	NaN	NaN	NaN	NaN	NaN	NaN	NaN	NaN	NaN	NaN	NaN	NaN	NaN	NaN	NaN	NaN	NaN	NaN	NaN	NaN	NaN	NaN
CON__Q05B55	CON__Q05B55	3	3	3			>Q05B55 TREMBL:Q05B55 (Bos taurus) Similar to Ig kappa chain C region	1	3	3	3	26.7	26.7	26.7	26.59	240	240	NaN	NaN	NaN	NaN	NaN	NaN	NaN	NaN	NaN	NaN	NaN	NaN	NaN	NaN	NaN	NaN	NaN	NaN	NaN	NaN	NaN	NaN	NaN	NaN	NaN	NaN	NaN	NaN	NaN	NaN	NaN	NaN
CON__Q0IIK2;CON__Q29443	CON__Q0IIK2;CON__Q29443	46;45	46;45	42;41			>Q0IIK2 TREMBL:Q0IIK2 (Bos taurus) Transferrin;>Q29443 SWISS-PROT:Q29443 Serotransferrin - Bos taurus (Bovine).	2	46	46	42	67.5	67.5	62.4	77.738	704	704;685	0.98058	1.5229	1.5944	1.5754	1.4652	1.5715	1.1742	1.317	1.5504	1.8607	1.1235	1.5171	1.1094	1.2889	1.4369	1.5014	1.4956	1.3005	1.0175	1.7088	2.1884	1.2302	1.7421	1.8403	0.9382	1.6044	1.5272	1.3717	1.7629	1.5898	1.822	2.0601
CON__Q0V8M9;Q06033;Q06033-2;E7ET33	CON__Q0V8M9	13;4;4;3	13;4;4;3	13;4;4;3			>Q0V8M9 TREMBL:Q0V8M9;Q9TRI0 (Bos taurus) similar to inter-alpha (globulin) inhibitor H3 isoform 2	4	13	13	13	20	20	20	99.536	891	891;890;886;698	NaN	NaN	NaN	NaN	NaN	NaN	NaN	NaN	NaN	2.0568	NaN	NaN	NaN	NaN	NaN	1.4257	NaN	NaN	NaN	NaN	NaN	NaN	NaN	NaN	NaN	NaN	NaN	NaN	NaN	NaN	1.9084	NaN
CON__Q0VCM5	CON__Q0VCM5	2	2	2			>Q0VCM5 TREMBL:Q0VCM5 (Bos taurus) Similar to Inter-alpha-trypsin inhibitor heavy chain H1	1	2	2	2	3.6	3.6	3.6	101.24	906	906	NaN	NaN	NaN	NaN	NaN	NaN	NaN	NaN	NaN	NaN	NaN	NaN	NaN	NaN	NaN	NaN	NaN	NaN	NaN	NaN	NaN	NaN	NaN	NaN	NaN	NaN	NaN	NaN	NaN	NaN	NaN	NaN
CON__Q1RMK2	CON__Q1RMK2	9	9	9			>Q1RMK2 TREMBL:Q1RMK2 (Bos taurus) IGHM protein	1	9	9	9	25.3	25.3	25.3	65.056	597	597	NaN	NaN	NaN	NaN	NaN	NaN	NaN	NaN	NaN	NaN	NaN	NaN	NaN	NaN	NaN	NaN	NaN	NaN	NaN	NaN	NaN	NaN	NaN	NaN	NaN	NaN	NaN	NaN	NaN	NaN	NaN	NaN
CON__Q1RMN8	CON__Q1RMN8	3	3	3			>Q1RMN8 TREMBL:Q1RMN8 (Bos taurus) Similar to Immunoglobulin lambda-like polypeptide 1	1	3	3	3	19.2	19.2	19.2	24.536	234	234	NaN	NaN	NaN	NaN	NaN	NaN	NaN	NaN	NaN	NaN	NaN	NaN	NaN	NaN	NaN	NaN	NaN	NaN	NaN	NaN	NaN	NaN	NaN	NaN	NaN	NaN	NaN	NaN	NaN	NaN	NaN	NaN
CON__Q28065	CON__Q28065	18	18	17			>Q28065 SWISS-PROT:Q28065 (Bos taurus) C4b-binding protein alpha chain precursor	1	18	18	17	33.6	33.6	33.6	68.886	610	610	1.0515	1.2973	1.238	0.98232	1.1573	1.1179	0.81653	1.0194	1.1697	0.98351	1.0311	0.92707	0.72337	0.8439	0.90109	0.65949	0.82986	NaN	0.8404	1.5244	1.2761	1.1742	1.3209	1.2646	0.86522	NaN	NaN	NaN	NaN	1.1883	0.92562	1.4831
CON__Q28085	CON__Q28085	10	10	10			>Q28085 SWISS-PROT:Q28085 (Bos taurus) Complement factor H precursor	1	10	10	10	12.5	12.5	12.5	140.37	1236	1236	NaN	NaN	NaN	NaN	NaN	NaN	NaN	NaN	NaN	NaN	NaN	NaN	NaN	NaN	NaN	NaN	NaN	NaN	NaN	NaN	NaN	NaN	NaN	NaN	NaN	NaN	NaN	NaN	NaN	NaN	NaN	NaN
CON__Q28107;P12259	CON__Q28107	11;2	11;2	11;2			>Q28107 SWISS-PROT:Q28107 (Bos taurus) Coagulation factor V precursor	2	11	11	11	6.9	6.9	6.9	248.98	2211	2211;2224	NaN	NaN	NaN	NaN	NaN	NaN	NaN	NaN	NaN	NaN	NaN	NaN	NaN	NaN	NaN	NaN	NaN	NaN	NaN	NaN	NaN	NaN	NaN	NaN	NaN	NaN	NaN	NaN	NaN	NaN	NaN	NaN
CON__Q2KIF2	CON__Q2KIF2	2	2	2			>Q2KIF2 TREMBL:Q2KIF2 (Bos taurus) Similar to leucine-rich alpha-2-glycoprotein 1	1	2	2	2	5.8	5.8	5.8	38.348	346	346	NaN	NaN	NaN	NaN	NaN	NaN	NaN	NaN	NaN	NaN	NaN	NaN	NaN	NaN	NaN	NaN	NaN	NaN	NaN	NaN	NaN	NaN	NaN	NaN	NaN	NaN	NaN	NaN	NaN	NaN	NaN	NaN
E9PHK0;P05452;CON__Q2KIS7	E9PHK0;P05452;CON__Q2KIS7	3;3;3	3;3;3	3;3;3	Tetranectin	CLEC3B	>tr|E9PHK0|E9PHK0_HUMAN Tetranectin OS=Homo sapiens GN=CLEC3B PE=2 SV=1;>sp|P05452|TETN_HUMAN Tetranectin OS=Homo sapiens GN=CLEC3B PE=1 SV=3;>Q2KIS7 SWISS-PROT:Q2KIS7 (Bos taurus) Tetranectin precursor	3	3	3	3	27.5	27.5	27.5	17.794	160	160;202;202	NaN	NaN	NaN	NaN	NaN	NaN	NaN	NaN	NaN	NaN	NaN	NaN	NaN	NaN	NaN	NaN	NaN	NaN	NaN	NaN	NaN	NaN	NaN	NaN	NaN	NaN	NaN	NaN	NaN	NaN	NaN	NaN
CON__Q2KJF1;P04217-2	CON__Q2KJF1	14;1	14;1	13;0			>Q2KJF1 TREMBL:Q2KJF1 (Bos taurus) Alpha-1-B glycoprotein	2	14	14	13	49.3	49.3	47.9	53.553	503	503;373	0.91977	1.3535	1.5407	1.2598	1.3364	1.7426	1.155	1.3651	NaN	1.7506	NaN	1.3089	0.96967	0.95854	1.2383	1.4663	1.3267	1.0989	NaN	1.4645	NaN	0.92144	1.8114	1.9315	NaN	1.4804	1.5696	1.298	1.6249	1.4637	1.9556	2.3802
CON__Q2UVX4;M0QXZ3	CON__Q2UVX4	48;1	48;1	42;0			>Q2UVX4 SWISS-PROT:Q2UVX4 (Bos taurus) Complement C3 precursor	2	48	48	42	37.2	37.2	33.9	187.37	1662	1662;100	1.1056	1.4686	1.6768	1.3755	1.5003	1.5781	1.1172	1.3399	1.5165	1.8113	1.0951	1.3608	1.0656	1.1502	1.5509	1.5498	1.6842	1.4298	0.98155	1.5815	2.0302	1.3221	1.7876	1.9003	0.99103	1.6288	1.5677	1.3414	2.0982	1.6493	1.567	1.6327
P08729;CON__Q3KNV1;F8VZY5;B4DIR1;K7ELP4;K7EKH9;CON__Q61726;H0YHD9;F8VS61;CON__Q3TTY5	P08729;CON__Q3KNV1;F8VZY5	37;37;28;2;2;2;2;1;1;1	2;2;2;0;0;0;0;0;0;0	2;2;2;0;0;0;0;0;0;0	Keratin, type II cytoskeletal 7	KRT7	>sp|P08729|K2C7_HUMAN Keratin, type II cytoskeletal 7 OS=Homo sapiens GN=KRT7 PE=1 SV=5;>Q3KNV1 TREMBL:Q3KNV1;Q96GE1 Tax_Id=9606 Gene_Symbol=KRT7 keratin 7;>tr|F8VZY5|F8VZY5_HUMAN Keratin, type II cytoskeletal 7 (Fragment) OS=Homo sapiens GN=KRT7 PE=2 SV=1	10	37	2	2	69.1	6	6	51.385	469	469;469;340;179;189;261;479;143;248;707	0.91056	1.1332	1.0682	1.1731	1.215	1.27	1.0544	1.1339	1.3046	1.3245	1.3759	1.0694	1.2217	1.1636	1.3676	0.98739	1.1631	1.09	1.046	1.4807	1.2731	NaN	1.246	1.2139	0.93014	1.2889	1.3229	1.3391	1.3254	NaN	1.302	1.4756
CON__Q3KUS7;B0UXW4;P00751-2	CON__Q3KUS7	17;1;1	17;1;1	16;0;0			>Q3KUS7 TREMBL:Q3KUS7 (Bos taurus) Complement factor B	3	17	17	16	27.1	27.1	26.2	85.411	760	760;589;621	NaN	1.6065	1.3896	NaN	NaN	NaN	0.98288	NaN	1.1877	1.0518	1.1345	NaN	1.0867	1.2352	NaN	1.581	1.3951	NaN	NaN	NaN	NaN	NaN	NaN	NaN	NaN	NaN	NaN	NaN	NaN	NaN	NaN	NaN
CON__Q3MHN5	CON__Q3MHN5	18	2	2			>Q3MHN5 SWISS-PROT:Q3MHN5 (Bos taurus) Vitamin D-binding protein precursor	1	18	2	2	44.7	3.8	3.8	53.341	474	474	NaN	NaN	NaN	NaN	NaN	NaN	NaN	NaN	NaN	1.4017	NaN	NaN	NaN	NaN	NaN	NaN	NaN	NaN	NaN	NaN	NaN	NaN	NaN	NaN	NaN	NaN	NaN	NaN	NaN	NaN	NaN	NaN
CON__Q3SX09;P68871;P02042;E9PFT6;P02100;A8MUF7;F8W6P5;E9PEW8	CON__Q3SX09	13;2;2;2;1;1;1;1	13;2;2;2;1;1;1;1	9;1;1;1;0;0;0;0			>Q3SX09 TREMBL:Q3SX09 (Bos taurus) similar to HBG protein	8	13	13	9	61.7	61.7	44.3	22.06	201	201;147;147;141;147;87;90;104	0.93976	1.179	1.158	1.1171	1.144	1.2394	1.0081	0.9723	1.1572	1.228	1.1642	1.0545	0.98692	0.99331	1.2321	1.1541	1.2009	1.0885	1.0499	1.2421	1.3525	0.97373	1.25	1.2733	0.86978	1.1972	1.1083	1.0669	1.2666	1.1396	1.2965	1.2754
CON__Q3SX14;Q5T0I1;Q5T0I0	CON__Q3SX14	14;2;2	14;2;2	6;0;0			>Q3SX14 TREMBL:Q3SX14 (Bos taurus) Similar to Gelsolin	3	14	14	6	29.4	29.4	16.6	85.686	781	781;228;260	NaN	1.0018	1.0168	1.2733	1.0674	1.3903	1.0335	0.984	1.1687	1.2154	1.1799	1.0968	0.82936	1.0454	1.2792	1.1696	1.0649	NaN	0.70639	NaN	NaN	NaN	NaN	1.2797	1.0572	NaN	0.86429	NaN	NaN	1.2153	1.3171	1.0828
CON__Q3SX28	CON__Q3SX28	24	1	0			>Q3SX28 TREMBL:Q3SX28;Q5KR48 (Bos taurus) Tropomyosin 2	1	24	1	0	53.2	4.6	0	33.012	284	284	NaN	NaN	NaN	NaN	NaN	NaN	NaN	NaN	NaN	NaN	NaN	NaN	NaN	NaN	NaN	NaN	NaN	NaN	NaN	NaN	NaN	NaN	NaN	NaN	NaN	NaN	NaN	NaN	NaN	NaN	NaN	NaN
CON__Q3SZ57;P02771;J3KMX3	CON__Q3SZ57	26;3;3	26;3;3	26;3;3			>Q3SZ57 SWISS-PROT:Q3SZ57 (Bos taurus) Alpha-fetoprotein precursor	3	26	26	26	56.9	56.9	56.9	68.587	610	610;609;622	0.96589	1.7062	1.8204	1.6793	1.3844	1.8653	1.1983	1.2393	1.5849	1.9123	1.1223	1.6105	1.2066	1.3159	1.4184	1.4886	1.7154	1.1781	1.0353	1.9944	2.7568	1.1312	1.8874	1.9814	0.79079	1.7985	1.689	1.5371	1.9625	1.5923	1.9225	2.1816
CON__Q3SZH5	CON__Q3SZH5	15	15	15			>Q3SZH5 TREMBL:Q3SZH5 (Bos taurus) Similar to Angiotensinogen	1	15	15	15	59.7	59.7	59.7	45.456	424	424	NaN	1.2668	1.4434	1.2918	1.2955	1.1795	1.1154	0.77395	1.2976	1.3341	0.66745	NaN	0.90161	1.1196	NaN	1.4134	1.0017	0.80693	NaN	1.4221	1.1216	NaN	NaN	NaN	0.78014	1.1682	1.148	1.1505	1.5687	1.269	1.3751	1.5454
CON__Q3SZR3	CON__Q3SZR3	10	10	10			>Q3SZR3 SWISS-PROT:Q3SZR3 (Bos taurus) Alpha-1-acid glycoprotein precursor	1	10	10	10	42.6	42.6	42.6	23.182	202	202	0.63466	1.361	1.383	1.508	1.2265	1.5645	0.95336	1.1245	1.3684	1.5925	1.0623	1.328	0.97237	1.202	1.4873	1.33	1.8935	1.1063	1.0203	2.0234	2.171	1.2924	1.6068	1.7761	0.94553	1.9095	1.429	1.4364	1.731	1.6303	1.839	2.3548
CON__Q3SZV7	CON__Q3SZV7	12	12	12			>Q3SZV7 TREMBL:Q3SZV7 (Bos taurus) Similar to hemopexin	1	12	12	12	43.9	43.9	43.9	52.295	460	460	NaN	2.1638	1.7143	1.5207	1.5943	1.6338	0.9706	NaN	1.5963	1.9666	1.1297	1.5557	1.318	1.6548	NaN	1.3361	1.7543	1.1494	0.95848	2.2008	2.6301	1.17	1.6864	2.2555	1.0986	1.8671	1.6674	1.5653	2.3021	1.6315	2.2187	1.9986
CON__Q3T052;Q14624;Q14624-2;F5GXQ1;Q14624-4;Q14624-3;B7ZKJ8	CON__Q3T052	21;1;1;1;1;1;1	21;1;1;1;1;1;1	21;1;1;1;1;1;1			>Q3T052 TREMBL:Q3T052;Q5EA67 (Bos taurus) Inter-alpha (Globulin) inhibitor H4	7	21	21	21	26.3	26.3	26.3	101.51	916	916;930;914;560;845;900;935	NaN	NaN	NaN	NaN	NaN	NaN	NaN	1.0697	NaN	NaN	NaN	NaN	NaN	NaN	NaN	NaN	NaN	NaN	NaN	1.0189	2.2532	1.2173	1.4282	1.4772	0.86453	0.96355	1.0134	1.5247	1.899	1.6502	1.78	2.2339
CON__Q3Y5Z3	CON__Q3Y5Z3	4	4	4			>Q3Y5Z3 SWISS-PROT:Q3Y5Z3 (Bos taurus) Adiponectin precursor	1	4	4	4	21.7	21.7	21.7	26.133	240	240	NaN	NaN	NaN	NaN	NaN	NaN	NaN	1.2756	NaN	NaN	NaN	NaN	NaN	NaN	NaN	NaN	NaN	NaN	NaN	NaN	NaN	NaN	NaN	NaN	NaN	NaN	NaN	NaN	NaN	NaN	NaN	1.5115
CON__Q3ZBD7	CON__Q3ZBD7	7	2	2			>Q3ZBD7 SWISS-PROT:Q3ZBD7 (Bos taurus) Glucose-6-phosphate isomerase	1	7	2	2	18.5	6.3	6.3	62.87	557	557	1.1061	1.3616	1.3725	1.2288	1.3211	1.3379	1.3207	1.1923	1.3516	1.3126	1.3669	1.2919	1.2884	1.3965	1.4987	1.2947	1.2885	1.2973	0.86105	1.3693	1.3013	1.2517	1.4265	1.2773	1.0372	NaN	1.3418	1.2281	1.2057	1.2087	1.3775	1.2784
CON__Q3ZBS7	CON__Q3ZBS7	11	11	10			>Q3ZBS7 TREMBL:Q3ZBS7 (Bos taurus) Vitronectin	1	11	11	10	27.3	27.3	24.2	54.099	484	484	0.87899	1.058	1.1097	0.89588	0.98274	1.3053	1.0291	0.95026	1.3027	1.0541	1.0838	0.94065	1.0138	0.91874	1.345	1.1468	1.1954	1.1844	1.0004	1.0966	1.3076	0.81459	1.102	0.98338	0.65624	1.0683	1.1586	1.0314	0.94038	1.1283	1.2585	1.0018
CON__Q497I4;Q92764;C4AM86;Q14532;O76013;O76013-2;CON__Q92764;CON__Q14532;CON__O76013;O76014;CON__A2A5Y0;CON__A2AB72;O76015;CON__O76015;CON__Q148H6;CON__O76014;CON__REFSEQ:XP_986630	CON__Q497I4;Q92764;C4AM86;Q14532;O76013;O76013-2;CON__Q92764;CON__Q14532;CON__O76013	4;3;3;2;2;2;2;2;2;1;1;1;1;1;1;1;1	2;1;1;1;1;1;0;1;1;0;0;0;0;0;0;0;0	2;1;1;1;1;1;0;1;1;0;0;0;0;0;0;0;0	Keratin, type I cuticular Ha5;Keratin, type I cuticular Ha2;Keratin, type I cuticular Ha6	KRT35;KRT32;KRT36	>Q497I4 TREMBL:Q497I4 Tax_Id=10090 Gene_Symbol=Krt35 Krt35 protein;>sp|Q92764|KRT35_HUMAN Keratin, type I cuticular Ha5 OS=Homo sapiens GN=KRT35 PE=2 SV=5;>tr|C4AM86|C4AM86_HUMAN Keratin, type I cuticular Ha5 OS=Homo sapiens GN=KRT35 PE=2 SV=1;>sp|Q14532|K	17	4	2	2	8.6	5.1	5.1	50.529	455	455;455;425;448;467;417;425;448;467;449;416;453;456;456;464;471;476	NaN	NaN	NaN	NaN	NaN	NaN	NaN	NaN	NaN	0.8322	NaN	NaN	NaN	1.0108	NaN	NaN	NaN	0.9376	NaN	1.2529	NaN	1.2166	NaN	NaN	0.89092	1.0316	NaN	NaN	NaN	1.1378	NaN	NaN
CON__Q58D62	CON__Q58D62	9	9	9			>Q58D62 SWISS-PROT:Q58D62 (Bos taurus) Fetuin-B precursor	1	9	9	9	29.7	29.7	29.7	42.663	387	387	0.99711	1.4031	1.6078	1.4645	1.4436	1.5545	1.0688	1.2823	1.4153	1.9314	0.99459	1.3268	1.0183	1.152	1.2155	1.5184	1.5234	1.1038	1.0022	1.7467	2.3128	1.1224	1.7407	2.0309	0.75342	1.6461	1.5287	1.413	1.8418	1.7012	1.991	2.1319
Q9NSB2;CON__Q9NSB2;CON__Q6ISB0	Q9NSB2;CON__Q9NSB2;CON__Q6ISB0	8;8;8	4;4;4	3;3;3	Keratin, type II cuticular Hb4	KRT84	>sp|Q9NSB2|KRT84_HUMAN Keratin, type II cuticular Hb4 OS=Homo sapiens GN=KRT84 PE=2 SV=2;>Q9NSB2 SWISS-PROT:Q9NSB2 Keratin, type II cuticular Hb4 (Hair keratin, type II Hb4) - Homo sapiens (Human).;>Q6ISB0 TREMBL:Q6ISB0 Keratin, hair, basic, 4 - Homo sapie	3	8	4	3	16.3	12.3	10.5	64.842	600	600;600;600	NaN	NaN	NaN	NaN	NaN	NaN	NaN	NaN	NaN	NaN	NaN	NaN	NaN	NaN	NaN	NaN	NaN	NaN	NaN	NaN	NaN	NaN	NaN	NaN	NaN	NaN	NaN	NaN	NaN	NaN	NaN	NaN
Q6KB66;Q6KB66-2;CON__Q6KB66-1;Q6KB66-3	Q6KB66;Q6KB66-2;CON__Q6KB66-1;Q6KB66-3	15;15;15;10	14;14;14;9	10;10;10;6	Keratin, type II cytoskeletal 80	KRT80	>sp|Q6KB66|K2C80_HUMAN Keratin, type II cytoskeletal 80 OS=Homo sapiens GN=KRT80 PE=1 SV=2;>sp|Q6KB66-2|K2C80_HUMAN Isoform 2 of Keratin, type II cytoskeletal 80 OS=Homo sapiens GN=KRT80;>Q6KB66-1 SWISS-PROT:Q6KB66-1 Tax_Id=9606 Gene_Symbol=KRT80 Isoform 1	4	15	14	10	36.7	34.1	24.6	50.525	452	452;422;452;487	NaN	NaN	NaN	NaN	NaN	NaN	NaN	NaN	NaN	NaN	NaN	NaN	NaN	NaN	NaN	NaN	NaN	NaN	NaN	NaN	NaN	NaN	NaN	NaN	NaN	NaN	NaN	NaN	NaN	NaN	NaN	NaN
CON__Q8VED5;Q3SY84;CON__Q3SY84	CON__Q8VED5	10;2;2	3;1;1	1;0;0			>Q8VED5 TREMBL:Q8VED5 Tax_Id=10090 Gene_Symbol=Krt79 Keratin 79	3	10	3	1	15.3	6.2	2.1	57.552	531	531;523;523	NaN	NaN	NaN	NaN	NaN	NaN	NaN	NaN	NaN	NaN	NaN	NaN	NaN	NaN	NaN	NaN	NaN	NaN	NaN	NaN	NaN	NaN	NaN	NaN	NaN	NaN	NaN	NaN	NaN	NaN	NaN	NaN
CON__Q95121;P36955;I3L3M1;I3L425;I3L4F9;I3L107;I3L3Z3;I3L1U4;I3L4Z0;I3L2R7;I3L4N7	CON__Q95121	11;3;2;1;1;1;1;1;1;1;1	11;3;2;1;1;1;1;1;1;1;1	11;3;2;1;1;1;1;1;1;1;1			>Q95121 SWISS-PROT:Q95121 (Bos taurus) Pigment epithelium-derived factor precursor	11	11	11	11	36.1	36.1	36.1	46.228	416	416;418;231;87;91;99;111;114;128;132;138	NaN	NaN	NaN	NaN	NaN	NaN	NaN	NaN	NaN	NaN	NaN	NaN	NaN	NaN	1.6032	2.032	NaN	NaN	NaN	NaN	NaN	NaN	NaN	0.59018	NaN	NaN	NaN	NaN	NaN	NaN	NaN	NaN
CON__Q95M17	CON__Q95M17	1	1	1			>Q95M17 SWISS-PROT:Q95M17 (Bos taurus) Acidic mammalian chitinase precursor	1	1	1	1	3.2	3.2	3.2	52.129	472	472	NaN	NaN	NaN	NaN	NaN	NaN	NaN	NaN	NaN	NaN	NaN	NaN	NaN	NaN	NaN	NaN	NaN	NaN	NaN	NaN	NaN	NaN	NaN	NaN	NaN	NaN	NaN	NaN	NaN	NaN	NaN	NaN
CON__Q9DCV7	CON__Q9DCV7	11	3	3			>Q9DCV7 SWISS-PROT:Q9DCV7 Tax_Id=10090 Gene_Symbol=Krt7 Keratin, type II cytoskeletal 7	1	11	3	3	21.7	6.8	6.8	50.708	457	457	NaN	NaN	NaN	NaN	NaN	NaN	NaN	NaN	NaN	NaN	NaN	NaN	NaN	NaN	NaN	NaN	NaN	NaN	NaN	NaN	NaN	NaN	NaN	NaN	NaN	0.90697	0.95403	NaN	NaN	NaN	NaN	NaN
Q9H552;CON__Q9H552	Q9H552;CON__Q9H552	15;15	1;1	1;1			>tr|Q9H552|Q9H552_HUMAN Uncharacterized protein OS=Homo sapiens PE=3 SV=1;>Q9H552 TREMBL:Q9H552 Tax_Id=9606 Gene_Symbol=- Keratin-8-like protein 1	2	15	1	1	21	2.6	2.6	55.151	499	499;499	NaN	NaN	NaN	NaN	NaN	NaN	NaN	NaN	NaN	NaN	NaN	NaN	NaN	NaN	NaN	NaN	NaN	NaN	NaN	NaN	NaN	NaN	NaN	NaN	NaN	NaN	NaN	NaN	NaN	NaN	NaN	NaN
CON__Q9N2I2	CON__Q9N2I2	2	2	2			>Q9N2I2 SWISS-PROT:Q9N2I2 (Bos taurus) Plasma serine protease inhibitor precursor	1	2	2	2	8.2	8.2	8.2	45.296	404	404	NaN	NaN	NaN	NaN	NaN	NaN	NaN	NaN	NaN	NaN	NaN	NaN	NaN	NaN	NaN	NaN	NaN	NaN	NaN	NaN	NaN	NaN	NaN	NaN	NaN	NaN	NaN	NaN	NaN	NaN	NaN	NaN
CON__Q9TRI1;Q5T987	CON__Q9TRI1	23;1	23;1	17;0			>Q9TRI1 TREMBL:Q9TRI1 (Bos taurus) similar to inter-alpha-trypsin inhibitor heavy chain2	2	23	23	17	30.2	30.2	24.8	106.19	946	946;237	0.90105	1.6057	1.5397	1.6448	1.5818	1.6468	1.1067	1.2215	1.2404	1.6918	0.96118	1.353	0.90369	1.0559	1.4071	1.5141	1.629	1.1285	0.86509	1.7006	1.9951	1.0665	1.5337	1.73	0.85766	1.6071	1.461	1.5042	1.7849	1.2527	1.2763	1.7482
CON__Q9TT36;P05543	CON__Q9TT36	5;2	5;2	5;2			>Q9TT36 SWISS-PROT:Q9TT36 (Bos taurus) Thyroxine-binding globulin precursor	2	5	5	5	14.1	14.1	14.1	46.017	411	411;415	NaN	NaN	NaN	NaN	NaN	NaN	NaN	NaN	NaN	NaN	NaN	NaN	NaN	NaN	NaN	NaN	NaN	NaN	NaN	NaN	NaN	NaN	NaN	1.4974	NaN	NaN	NaN	NaN	NaN	NaN	NaN	NaN
CON__Q9TTE1	CON__Q9TTE1	13	13	5			>Q9TTE1 SWISS-PROT:Q9TTE1 (Bos taurus) Endopin-1 precursor	1	13	13	5	34.3	34.3	14.4	46.203	411	411	0.75143	1.7104	1.885	1.6915	1.5909	1.7993	1.1593	1.2079	1.6685	2.1338	1.2084	1.4379	0.9803	1.1853	1.2841	1.7767	1.6194	1.085	0.91092	1.8187	2.3872	0.94154	1.8167	1.511	0.6134	1.2662	1.0293	1.445	1.3176	1.1412	1.6142	1.8086
CON__REFSEQ:XP_001252647	CON__REFSEQ:XP_001252647	12	11	5			>REFSEQ:XP_001252647 (Bos taurus) similar to endopin 2B	1	12	11	5	30.2	28.3	15.8	46.897	417	417	0.87819	NaN	1.3394	1.2138	1.2457	1.211	0.93044	1.1961	1.3741	1.9439	1.1381	1.3761	0.96441	1.0951	0.91408	1.4044	1.5469	1.2413	0.78772	1.6899	2.9259	1.0755	NaN	2.3797	0.81415	2.5065	NaN	NaN	1.6915	NaN	NaN	NaN
CON__REFSEQ:XP_092267	CON__REFSEQ:XP_092267	5	1	1			>REFSEQ:XP_092267 Tax_Id=9606 Gene_Symbol=LOC150739 similar to Keratin, type II cytoskeletal 8	1	5	1	1	26.3	8.9	8.9	23.122	213	213	NaN	NaN	NaN	NaN	NaN	NaN	NaN	NaN	NaN	NaN	NaN	NaN	NaN	NaN	NaN	NaN	NaN	NaN	NaN	NaN	NaN	NaN	NaN	NaN	NaN	NaN	NaN	NaN	NaN	NaN	NaN	NaN
CON__REFSEQ:XP_585019	CON__REFSEQ:XP_585019	11	11	11			>REFSEQ:XP_585019 (Bos taurus) similar to afamin	1	11	11	11	21.4	21.4	21.4	69.561	604	604	NaN	NaN	NaN	NaN	NaN	NaN	NaN	NaN	NaN	NaN	NaN	NaN	NaN	NaN	NaN	NaN	NaN	NaN	NaN	NaN	NaN	NaN	NaN	NaN	NaN	NaN	NaN	NaN	NaN	NaN	NaN	NaN
P30038;P30038-2;D2D4A3	P30038;P30038-2;D2D4A3	3;3;3	3;3;3	3;3;3	Delta-1-pyrroline-5-carboxylate dehydrogenase, mitochondrial	ALDH4A1	>sp|P30038|AL4A1_HUMAN Delta-1-pyrroline-5-carboxylate dehydrogenase, mitochondrial OS=Homo sapiens GN=ALDH4A1 PE=1 SV=3;>sp|P30038-2|AL4A1_HUMAN Isoform 2 of Delta-1-pyrroline-5-carboxylate dehydrogenase, mitochondrial OS=Homo sapiens GN=ALDH4A1;>tr|D2D4A	3	3	3	3	7.6	7.6	7.6	61.719	563	563;503;512	NaN	NaN	NaN	NaN	NaN	NaN	NaN	NaN	NaN	NaN	NaN	NaN	NaN	NaN	NaN	NaN	NaN	NaN	NaN	NaN	NaN	NaN	NaN	NaN	NaN	NaN	NaN	NaN	NaN	NaN	NaN	NaN
P09914;D3DR31	P09914;D3DR31	19;19	19;19	17;17	Interferon-induced protein with tetratricopeptide repeats 1	IFIT1	>sp|P09914|IFIT1_HUMAN Interferon-induced protein with tetratricopeptide repeats 1 OS=Homo sapiens GN=IFIT1 PE=1 SV=2;>tr|D3DR31|D3DR31_HUMAN Interferon-induced protein with tetratricopeptide repeats 1 OS=Homo sapiens GN=IFIT1 PE=4 SV=1	2	19	19	17	48.5	48.5	47.1	55.36	478	478;447	1.1295	1.7788	1.2347	1.301	1.2604	1.169	1.403	1.425	1.4885	1.2394	1.3331	1.1882	1.2426	1.2111	1.307	1.2096	1.0637	1.1218	0.90648	1.0171	1.1077	1.0139	1.1383	1.0626	0.75198	1.2232	NaN	0.97161	1.2037	1.0639	1.037	1.2632
Q15599;Q15599-2;D3DU85;H3BSA4;H3BQS0;H3BMF5;H3BUQ9;H3BN50;H3BSV6	Q15599;Q15599-2;D3DU85;H3BSA4	10;10;10;6;4;3;3;3;3	10;10;10;6;4;3;3;3;3	10;10;10;6;4;3;3;3;3	Na(+)/H(+) exchange regulatory cofactor NHE-RF2	SLC9A3R2	>sp|Q15599|NHRF2_HUMAN Na(+)/H(+) exchange regulatory cofactor NHE-RF2 OS=Homo sapiens GN=SLC9A3R2 PE=1 SV=2;>sp|Q15599-2|NHRF2_HUMAN Isoform 2 of Na(+)/H(+) exchange regulatory cofactor NHE-RF2 OS=Homo sapiens GN=SLC9A3R2;>tr|D3DU85|D3DU85_HUMAN Na(+)/H(+	9	10	10	10	38.9	38.9	38.9	37.413	337	337;326;326;170;231;151;166;223;226	NaN	NaN	NaN	NaN	0.93173	NaN	NaN	NaN	NaN	NaN	NaN	NaN	NaN	NaN	1.2934	NaN	NaN	NaN	1.0804	NaN	1.7108	1.1442	1.1538	NaN	NaN	0.90824	NaN	NaN	NaN	0.62936	1.2903	1.0101
D3K174;E9PDL9;Q9Y6M7-9;Q9Y6M7-6;E9PGC1;E9PFN4;Q9Y6M7-8;Q9Y6M7-7;B6DY53;B6DY52;Q9Y6M7;Q9Y6M7-3;C9JRP1;Q9Y6M7-2;F8W7E6;H7C3C4;Q9Y6M7-4;Q9Y6M7-5;Q2Y0W8;Q2Y0W8-4;Q2Y0W8-5;Q2Y0W8-3;Q2Y0W8-2	D3K174;E9PDL9;Q9Y6M7-9;Q9Y6M7-6;E9PGC1;E9PFN4;Q9Y6M7-8;Q9Y6M7-7;B6DY53;B6DY52;Q9Y6M7;Q9Y6M7-3;C9JRP1;Q9Y6M7-2;F8W7E6;H7C3C4;Q9Y6M7-4	8;8;7;7;7;7;7;7;6;6;5;5;5;5;4;4;4;3;1;1;1;1;1	8;8;7;7;7;7;7;7;6;6;5;5;5;5;4;4;4;3;1;1;1;1;1	8;8;7;7;7;7;7;7;6;6;5;5;5;5;4;4;4;3;1;1;1;1;1	Sodium bicarbonate cotransporter 3	SLC4A7	>tr|D3K174|D3K174_HUMAN Sodium bicarbonate cotransporter 3 OS=Homo sapiens GN=SLC4A7 PE=2 SV=1;>tr|E9PDL9|E9PDL9_HUMAN Sodium bicarbonate cotransporter 3 OS=Homo sapiens GN=SLC4A7 PE=2 SV=1;>sp|Q9Y6M7-9|S4A7_HUMAN Isoform 9 of Sodium bicarbonate cotranspor	23	8	8	8	9.1	9.1	9.1	127.8	1135	1135;1259;1095;1131;1206;1210;1246;1259;463;574;1214;1018;1051;1090;800;801;1000;800;1093;991;1040;1044;1071	NaN	NaN	1.1338	NaN	1.1381	0.72491	NaN	NaN	1.2527	0.89402	1.3815	NaN	NaN	0.909	NaN	NaN	0.96107	1.1163	1.0264	NaN	0.58116	NaN	NaN	NaN	NaN	0.72403	NaN	NaN	NaN	0.6173	0.58323	NaN
P63098;F6U1T9;D3YTA9;H7BYZ3	P63098;F6U1T9;D3YTA9;H7BYZ3	5;5;5;5	5;5;5;5	4;4;4;4	Calcineurin subunit B type 1	PPP3R1	>sp|P63098|CANB1_HUMAN Calcineurin subunit B type 1 OS=Homo sapiens GN=PPP3R1 PE=1 SV=2;>tr|F6U1T9|F6U1T9_HUMAN Calcineurin subunit B type 1 OS=Homo sapiens GN=PPP3R1 PE=2 SV=1;>tr|D3YTA9|D3YTA9_HUMAN Calcineurin subunit B type 1 OS=Homo sapiens GN=PPP3R1	4	5	5	4	32.9	32.9	24.7	19.3	170	170;160;189;331	NaN	NaN	NaN	NaN	NaN	NaN	NaN	NaN	NaN	NaN	NaN	NaN	NaN	NaN	NaN	NaN	NaN	NaN	NaN	NaN	NaN	NaN	NaN	0.97262	NaN	NaN	NaN	1.2926	NaN	0.8572	0.77613	NaN
P62910;D3YTB1;F8W727;D3YTI8	P62910;D3YTB1;F8W727	11;11;11;1	11;11;11;1	11;11;11;1	60S ribosomal protein L32	RPL32	>sp|P62910|RL32_HUMAN 60S ribosomal protein L32 OS=Homo sapiens GN=RPL32 PE=1 SV=2;>tr|D3YTB1|D3YTB1_HUMAN 60S ribosomal protein L32 (Fragment) OS=Homo sapiens GN=RPL32 PE=2 SV=1;>tr|F8W727|F8W727_HUMAN 60S ribosomal protein L32 OS=Homo sapiens GN=RPL32 PE	4	11	11	11	54.1	54.1	54.1	15.86	135	135;133;153;62	0.86277	1.0632	1.063	1.0384	1.1132	1.1274	1.108	1.0843	1.1313	1.0762	1.0138	1.04	1.0799	1.1375	1.154	1.0211	1.0699	1.0774	0.92931	1.3167	1.2603	1.2456	1.5321	1.2895	1.0245	1.3612	1.3404	1.2435	1.2676	1.2255	1.4238	1.2208
P51617;P51617-4;P51617-2;P51617-3;D3YTB5;H7C3C1;H7C1F0;H7C2I6;F8WAB6;H7C224	P51617;P51617-4;P51617-2;P51617-3;D3YTB5;H7C3C1;H7C1F0;H7C2I6;F8WAB6;H7C224	4;4;4;4;4;2;2;2;2;2	4;4;4;4;4;2;2;2;2;2	4;4;4;4;4;2;2;2;2;2	Interleukin-1 receptor-associated kinase 1	IRAK1	>sp|P51617|IRAK1_HUMAN Interleukin-1 receptor-associated kinase 1 OS=Homo sapiens GN=IRAK1 PE=1 SV=2;>sp|P51617-4|IRAK1_HUMAN Isoform 4 of Interleukin-1 receptor-associated kinase 1 OS=Homo sapiens GN=IRAK1;>sp|P51617-2|IRAK1_HUMAN Isoform 2 of Interleukin	10	4	4	4	11.2	11.2	11.2	76.536	712	712;633;682;693;708;218;234;276;339;392	NaN	NaN	NaN	NaN	NaN	NaN	NaN	NaN	NaN	NaN	NaN	NaN	NaN	NaN	NaN	NaN	NaN	NaN	NaN	NaN	NaN	NaN	NaN	NaN	NaN	NaN	NaN	NaN	NaN	NaN	NaN	NaN
Q6NXT1;D3YTC9;F8WB76;Q6NXT1-2;H7BZV9;B5MCX7;H7C3L3;C9JU48	Q6NXT1;D3YTC9;F8WB76;Q6NXT1-2;H7BZV9;B5MCX7;H7C3L3;C9JU48	2;2;1;1;1;1;1;1	2;2;1;1;1;1;1;1	2;2;1;1;1;1;1;1	Ankyrin repeat domain-containing protein 54	ANKRD54	>sp|Q6NXT1|ANR54_HUMAN Ankyrin repeat domain-containing protein 54 OS=Homo sapiens GN=ANKRD54 PE=1 SV=2;>tr|D3YTC9|D3YTC9_HUMAN Ankyrin repeat domain-containing protein 54 OS=Homo sapiens GN=ANKRD54 PE=4 SV=1;>tr|F8WB76|F8WB76_HUMAN Ankyrin repeat domain-c	8	2	2	2	9.7	9.7	9.7	32.505	300	300;284;156;161;178;180;208;217	NaN	NaN	NaN	NaN	NaN	NaN	NaN	NaN	NaN	NaN	NaN	NaN	NaN	NaN	NaN	NaN	NaN	NaN	NaN	NaN	NaN	NaN	NaN	NaN	NaN	NaN	NaN	NaN	NaN	NaN	NaN	NaN
Q9NNW7;F5H1L4;E7ENA2;Q9NNW7-2;F5H2V0;D3YTF9;D3YTF8;Q9NNW7-3;E7EWK1;Q9NNW7-4	Q9NNW7;F5H1L4;E7ENA2;Q9NNW7-2;F5H2V0;D3YTF9;D3YTF8;Q9NNW7-3;E7EWK1;Q9NNW7-4	10;10;10;10;10;10;9;7;6;5	9;9;9;9;9;9;8;7;5;5	9;9;9;9;9;9;8;7;5;5	Thioredoxin reductase 2, mitochondrial	TXNRD2	>sp|Q9NNW7|TRXR2_HUMAN Thioredoxin reductase 2, mitochondrial OS=Homo sapiens GN=TXNRD2 PE=1 SV=3;>tr|F5H1L4|F5H1L4_HUMAN Thioredoxin reductase 2, mitochondrial OS=Homo sapiens GN=TXNRD2 PE=2 SV=1;>tr|E7ENA2|E7ENA2_HUMAN Thioredoxin reductase 2, mitochondr	10	10	9	9	32.3	29.4	29.4	56.506	524	524;492;494;498;521;523;501;428;338;277	0.89693	0.95877	1.3756	1.0604	1.0956	1.0149	0.93724	0.75359	1.1594	1.128	1.1038	0.92883	1.006	1.0943	0.93302	1.1578	0.99971	1.231	1.1198	1.2431	1.2097	1.3242	1.0574	1.2634	1.0261	1.1482	1.3288	1.1983	1.2271	0.99023	1.372	1.1848
Q13557;Q13557-8;Q13557-12;Q13557-10;D6R938;E9PBG7;Q13557-6;Q13557-11;E9PF82;Q13557-9;Q13557-5;Q13557-3;Q13557-4;H0Y9J2;H0Y9C2	Q13557;Q13557-8;Q13557-12;Q13557-10;D6R938;E9PBG7;Q13557-6;Q13557-11;E9PF82;Q13557-9;Q13557-5;Q13557-3;Q13557-4;H0Y9J2	10;10;10;10;10;10;10;10;10;9;9;9;9;5;4	7;7;7;7;7;7;7;7;7;6;6;6;6;5;3	6;6;6;6;6;6;6;6;6;5;5;5;5;4;2	Calcium/calmodulin-dependent protein kinase type II subunit delta	CAMK2D	>sp|Q13557|KCC2D_HUMAN Calcium/calmodulin-dependent protein kinase type II subunit delta OS=Homo sapiens GN=CAMK2D PE=1 SV=3;>sp|Q13557-8|KCC2D_HUMAN Isoform Delta 6 of Calcium/calmodulin-dependent protein kinase type II subunit delta OS=Homo sapiens GN=CA	15	10	7	6	26.5	18.8	16.6	56.369	499	499;478;478;492;498;512;513;524;533;489;498;510;519;182;194	NaN	NaN	NaN	NaN	NaN	NaN	NaN	NaN	NaN	NaN	NaN	NaN	NaN	NaN	NaN	NaN	NaN	NaN	NaN	NaN	NaN	NaN	NaN	NaN	NaN	NaN	NaN	NaN	NaN	NaN	NaN	NaN
Q01201;D6R992	Q01201;D6R992	2;2	2;2	2;2	Transcription factor RelB	RELB	>sp|Q01201|RELB_HUMAN Transcription factor RelB OS=Homo sapiens GN=RELB PE=1 SV=2;>tr|D6R992|D6R992_HUMAN Transcription factor RelB OS=Homo sapiens GN=RELB PE=4 SV=1	2	2	2	2	6.2	6.2	6.2	62.134	579	579;576	NaN	NaN	NaN	NaN	NaN	NaN	NaN	NaN	NaN	NaN	NaN	NaN	NaN	NaN	NaN	NaN	NaN	NaN	NaN	NaN	NaN	NaN	NaN	NaN	NaN	NaN	NaN	NaN	NaN	NaN	NaN	NaN
Q99729-3;D6R9P3;D6RD18;D6RBZ0;Q99729-2;Q99729;Q99729-4	Q99729-3;D6R9P3;D6RD18;D6RBZ0;Q99729-2;Q99729;Q99729-4	11;11;11;11;11;9;9	11;11;11;11;11;9;9	11;11;11;11;11;9;9	Heterogeneous nuclear ribonucleoprotein A/B	HNRNPAB	>sp|Q99729-3|ROAA_HUMAN Isoform 3 of Heterogeneous nuclear ribonucleoprotein A/B OS=Homo sapiens GN=HNRNPAB;>tr|D6R9P3|D6R9P3_HUMAN Heterogeneous nuclear ribonucleoprotein A/B OS=Homo sapiens GN=HNRNPAB PE=2 SV=1;>tr|D6RD18|D6RD18_HUMAN Heterogeneous nucle	7	11	11	11	29.8	29.8	29.8	30.588	285	285;280;283;327;332;332;286	0.91622	1.2958	1.164	1.1465	1.2014	1.3387	1.1381	1.1898	1.1807	1.1761	1.1051	1.2334	1.0956	1.179	1.2663	1.0603	1.1216	1.2146	1.1049	1.3152	1.3633	1.194	1.1829	1.514	1.0272	1.0573	1.3259	1.2392	1.1992	1.1856	1.433	1.2171
P15954;D6R9Z7	P15954;D6R9Z7	2;2	2;2	2;2	Cytochrome c oxidase subunit 7C, mitochondrial	COX7C	>sp|P15954|COX7C_HUMAN Cytochrome c oxidase subunit 7C, mitochondrial OS=Homo sapiens GN=COX7C PE=1 SV=1;>tr|D6R9Z7|D6R9Z7_HUMAN Cytochrome c oxidase subunit 7C, mitochondrial OS=Homo sapiens GN=COX7C PE=2 SV=1	2	2	2	2	30.2	30.2	30.2	7.2454	63	63;56	NaN	NaN	NaN	NaN	NaN	NaN	NaN	NaN	NaN	NaN	NaN	NaN	NaN	NaN	NaN	NaN	NaN	NaN	NaN	NaN	NaN	NaN	NaN	NaN	NaN	NaN	NaN	NaN	NaN	NaN	NaN	NaN
P78317;H0YAI5;D6RA71;F5H1U2	P78317;H0YAI5;D6RA71;F5H1U2	1;1;1;1	1;1;1;1	1;1;1;1	E3 ubiquitin-protein ligase RNF4	RNF4	>sp|P78317|RNF4_HUMAN E3 ubiquitin-protein ligase RNF4 OS=Homo sapiens GN=RNF4 PE=1 SV=1;>tr|H0YAI5|H0YAI5_HUMAN E3 ubiquitin-protein ligase RNF4 (Fragment) OS=Homo sapiens GN=RNF4 PE=4 SV=1;>tr|D6RA71|D6RA71_HUMAN E3 ubiquitin-protein ligase RNF4 (Fragmen	4	1	1	1	8.9	8.9	8.9	21.319	190	190;106;188;190	NaN	NaN	NaN	NaN	NaN	NaN	NaN	NaN	NaN	NaN	NaN	NaN	NaN	NaN	NaN	NaN	NaN	NaN	NaN	NaN	NaN	NaN	NaN	NaN	NaN	NaN	NaN	NaN	NaN	NaN	NaN	NaN
Q9BWW4;P81877;D6RAC5;P81877-2;P81877-4;P81877-5;P81877-3;Q9BWW4-2;Q9BWW4-3;Q9BWG4;Q9BWW5	Q9BWW4;P81877;D6RAC5;P81877-2;P81877-4;P81877-5;P81877-3;Q9BWW4-2;Q9BWW4-3;Q9BWG4;Q9BWW5	2;2;2;2;2;2;2;2;2;1;1	2;2;2;2;2;2;2;2;2;1;1	2;2;2;2;2;2;2;2;2;1;1	Single-stranded DNA-binding protein 3;Single-stranded DNA-binding protein 2;Single-stranded DNA-binding protein 4	SSBP3;SSBP2;SSBP4;SSDP4	>sp|Q9BWW4|SSBP3_HUMAN Single-stranded DNA-binding protein 3 OS=Homo sapiens GN=SSBP3 PE=1 SV=1;>sp|P81877|SSBP2_HUMAN Single-stranded DNA-binding protein 2 OS=Homo sapiens GN=SSBP2 PE=1 SV=2;>tr|D6RAC5|D6RAC5_HUMAN Single-stranded DNA-binding protein 2 (F	11	2	2	2	6.7	6.7	6.7	40.421	388	388;361;208;298;331;339;341;361;368;385;363	NaN	NaN	NaN	NaN	NaN	NaN	NaN	NaN	NaN	NaN	NaN	NaN	NaN	NaN	NaN	NaN	NaN	NaN	NaN	NaN	NaN	NaN	NaN	NaN	NaN	NaN	NaN	NaN	NaN	NaN	NaN	NaN
Q9C093;D6RAJ9;D6REZ4;Q9C093-2	Q9C093;D6RAJ9;D6REZ4;Q9C093-2	2;2;2;2	2;2;2;2	2;2;2;2	Sperm flagellar protein 2	SPEF2	>sp|Q9C093|SPEF2_HUMAN Sperm flagellar protein 2 OS=Homo sapiens GN=SPEF2 PE=1 SV=2;>tr|D6RAJ9|D6RAJ9_HUMAN Sperm flagellar protein 2 (Fragment) OS=Homo sapiens GN=SPEF2 PE=2 SV=1;>tr|D6REZ4|D6REZ4_HUMAN Sperm flagellar protein 2 OS=Homo sapiens GN=SPEF2 P	4	2	2	2	0.9	0.9	0.9	209.81	1822	1822;389;943;1818	NaN	NaN	NaN	NaN	NaN	NaN	NaN	NaN	NaN	NaN	NaN	NaN	NaN	NaN	NaN	NaN	NaN	NaN	NaN	NaN	NaN	NaN	NaN	NaN	NaN	NaN	NaN	NaN	NaN	NaN	NaN	NaN
Q15283;D6RBA9;G3V0F9	Q15283;D6RBA9;G3V0F9	1;1;1	1;1;1	1;1;1	Ras GTPase-activating protein 2	RASA2	>sp|Q15283|RASA2_HUMAN Ras GTPase-activating protein 2 OS=Homo sapiens GN=RASA2 PE=2 SV=2;>tr|D6RBA9|D6RBA9_HUMAN Ras GTPase-activating protein 2 OS=Homo sapiens GN=RASA2 PE=2 SV=1;>tr|G3V0F9|G3V0F9_HUMAN RAS p21 protein activator 2, isoform CRA_b OS=Homo	3	1	1	1	3.7	3.7	3.7	96.526	849	849;47;850	NaN	NaN	NaN	NaN	NaN	NaN	NaN	NaN	NaN	NaN	NaN	NaN	NaN	NaN	NaN	NaN	NaN	NaN	NaN	NaN	NaN	NaN	NaN	NaN	NaN	NaN	NaN	NaN	NaN	NaN	NaN	NaN
Q9H201;D6RBR6;D6RFG3;D6REL6;Q9H201-2;I6L9I8;B4DIQ9;F6QWW5	Q9H201;D6RBR6;D6RFG3;D6REL6;Q9H201-2;I6L9I8;B4DIQ9;F6QWW5	2;2;2;2;2;2;1;1	1;1;1;1;1;1;1;1	1;1;1;1;1;1;1;1	Epsin-3	EPN3	>sp|Q9H201|EPN3_HUMAN Epsin-3 OS=Homo sapiens GN=EPN3 PE=2 SV=1;>tr|D6RBR6|D6RBR6_HUMAN Epsin-3 (Fragment) OS=Homo sapiens GN=EPN3 PE=2 SV=1;>tr|D6RFG3|D6RFG3_HUMAN Epsin-3 (Fragment) OS=Homo sapiens GN=EPN3 PE=2 SV=1;>tr|D6REL6|D6REL6_HUMAN Epsin-3 (Fragm	8	2	1	1	3.5	1.6	1.6	68.221	632	632;108;136;168;208;318;250;660	NaN	NaN	NaN	NaN	NaN	NaN	NaN	NaN	NaN	NaN	NaN	NaN	NaN	NaN	NaN	NaN	NaN	NaN	NaN	NaN	NaN	NaN	NaN	NaN	NaN	NaN	NaN	NaN	NaN	NaN	NaN	NaN
Q8NBQ5;D6RCD0	Q8NBQ5;D6RCD0	8;8	8;8	8;8	Estradiol 17-beta-dehydrogenase 11	HSD17B11	>sp|Q8NBQ5|DHB11_HUMAN Estradiol 17-beta-dehydrogenase 11 OS=Homo sapiens GN=HSD17B11 PE=1 SV=3;>tr|D6RCD0|D6RCD0_HUMAN Estradiol 17-beta-dehydrogenase 11 OS=Homo sapiens GN=HSD17B11 PE=2 SV=1	2	8	8	8	33.3	33.3	33.3	32.935	300	300;256	NaN	NaN	NaN	NaN	NaN	NaN	NaN	NaN	NaN	NaN	NaN	NaN	NaN	NaN	NaN	NaN	NaN	NaN	1.0549	NaN	NaN	NaN	NaN	NaN	0.95573	NaN	NaN	NaN	NaN	NaN	NaN	NaN
Q9Y2J4;D6RCL7;Q9Y2J4-3;Q9Y2J4-2;Q9Y2J4-4;D6RIC7;D6RBK2;D6RJA4;D6RF61	Q9Y2J4;D6RCL7;Q9Y2J4-3;Q9Y2J4-2;Q9Y2J4-4;D6RIC7;D6RBK2;D6RJA4;D6RF61	2;2;2;2;2;1;1;1;1	2;2;2;2;2;1;1;1;1	2;2;2;2;2;1;1;1;1	Angiomotin-like protein 2	AMOTL2	>sp|Q9Y2J4|AMOL2_HUMAN Angiomotin-like protein 2 OS=Homo sapiens GN=AMOTL2 PE=1 SV=3;>tr|D6RCL7|D6RCL7_HUMAN Angiomotin-like protein 2 (Fragment) OS=Homo sapiens GN=AMOTL2 PE=2 SV=1;>sp|Q9Y2J4-3|AMOL2_HUMAN Isoform 3 of Angiomotin-like protein 2 OS=Homo sa	9	2	2	2	2.4	2.4	2.4	85.763	779	779;198;777;780;837;123;127;144;151	NaN	NaN	NaN	NaN	NaN	NaN	NaN	NaN	NaN	NaN	NaN	NaN	NaN	NaN	NaN	NaN	NaN	NaN	NaN	NaN	NaN	NaN	NaN	NaN	NaN	NaN	NaN	NaN	NaN	NaN	NaN	NaN
D6RDI3;Q9BVS4;H0Y919	D6RDI3;Q9BVS4	6;5;1	6;5;1	6;5;1	Serine/threonine-protein kinase RIO2	RIOK2	>tr|D6RDI3|D6RDI3_HUMAN Serine/threonine-protein kinase RIO2 OS=Homo sapiens GN=RIOK2 PE=2 SV=1;>sp|Q9BVS4|RIOK2_HUMAN Serine/threonine-protein kinase RIO2 OS=Homo sapiens GN=RIOK2 PE=1 SV=2	3	6	6	6	18.4	18.4	18.4	54.508	474	474;552;140	NaN	NaN	NaN	NaN	NaN	NaN	NaN	NaN	NaN	NaN	1.8411	NaN	1.2643	1.7193	NaN	1.467	1.5113	NaN	NaN	NaN	NaN	NaN	NaN	NaN	NaN	NaN	NaN	NaN	NaN	NaN	NaN	NaN
Q9H173;D6REA1;D6RIU8;A0RZB6;D6RG16;D6RBP7;D6RAI3	Q9H173;D6REA1	10;10;3;1;1;1;1	10;10;3;1;1;1;1	10;10;3;1;1;1;1	Nucleotide exchange factor SIL1	SIL1	>sp|Q9H173|SIL1_HUMAN Nucleotide exchange factor SIL1 OS=Homo sapiens GN=SIL1 PE=1 SV=1;>tr|D6REA1|D6REA1_HUMAN Nucleotide exchange factor SIL1 OS=Homo sapiens GN=SIL1 PE=2 SV=1	7	10	10	10	23.9	23.9	23.9	52.084	461	461;468;163;83;123;123;125	NaN	NaN	NaN	NaN	NaN	NaN	NaN	NaN	NaN	NaN	NaN	NaN	NaN	NaN	NaN	NaN	NaN	NaN	NaN	NaN	NaN	0.93651	0.8566	0.84763	NaN	NaN	NaN	0.93921	0.93416	NaN	1.0511	0.99733
P12081;D6REN6;B4DDD8;B3KWE1;J3KNE5;P12081-2;E7ETE2;C9JWK3;D6RF05	P12081;D6REN6;B4DDD8;B3KWE1;J3KNE5;P12081-2;E7ETE2;C9JWK3	22;22;20;20;20;20;14;14;2	22;22;20;20;20;20;14;14;2	2;2;2;2;0;0;2;0;0	Histidine--tRNA ligase, cytoplasmic	HARS	>sp|P12081|SYHC_HUMAN Histidine--tRNA ligase, cytoplasmic OS=Homo sapiens GN=HARS PE=1 SV=2;>tr|D6REN6|D6REN6_HUMAN Histidine--tRNA ligase, cytoplasmic OS=Homo sapiens GN=HARS PE=2 SV=1;>tr|B4DDD8|B4DDD8_HUMAN Histidine--tRNA ligase, cytoplasmic OS=Homo sa	9	22	22	2	46.8	46.8	4.3	57.41	509	509;489;435;440;449;469;288;314;60	0.94388	0.99448	1.0601	1.0169	1.067	1.0617	1.0206	1.0396	1.0408	1.0006	1.0403	1.0525	1.0435	1.0801	1.0744	0.99943	0.9415	1.0771	1.0292	1.1964	1.0916	1.1134	1.2211	1.1073	0.96607	1.1835	1.2012	1.1203	1.1799	1.0716	1.169	1.1981
Q9NVA2;D6RGI3;D6RER5;Q9NVA2-2;D6RDU5;H0Y961;H0Y9G8;D6RDP1;D6R9Y6	Q9NVA2;D6RGI3;D6RER5;Q9NVA2-2;D6RDU5;H0Y961	15;15;15;14;10;9;4;3;3	7;7;7;6;2;4;4;2;2	7;7;7;6;2;4;4;2;2	Septin-11	2011-09-01	>sp|Q9NVA2|SEP11_HUMAN Septin-11 OS=Homo sapiens GN=SEPT11 PE=1 SV=3;>tr|D6RGI3|D6RGI3_HUMAN Septin 11, isoform CRA_b OS=Homo sapiens GN=SEPT11 PE=3 SV=1;>tr|D6RER5|D6RER5_HUMAN Septin-11 OS=Homo sapiens GN=SEPT11 PE=2 SV=1;>sp|Q9NVA2-2|SEP11_HUMAN Isoform	9	15	7	7	36.4	17.5	17.5	49.398	429	429;425;432;439;372;160;82;126;136	NaN	1.5645	NaN	1.0151	NaN	NaN	NaN	NaN	NaN	NaN	NaN	NaN	NaN	NaN	NaN	NaN	NaN	NaN	NaN	NaN	NaN	NaN	NaN	NaN	NaN	1.64	NaN	NaN	1.2258	NaN	NaN	NaN
O94979;D6REX3;O94979-3;O94979-4;O94979-9;O94979-2;O94979-8;O94979-6;B7ZL00;D6RHZ5;H7BXG7;O94979-5;H0YAB3;H0Y8V7;H0Y9K1;H0Y9T9;H0Y8W8;H0YAF5;D6RE64;D6RCQ9;D6RBT0;D6RHE8;H0Y9V3	O94979;D6REX3;O94979-3;O94979-4;O94979-9;O94979-2;O94979-8;O94979-6;B7ZL00;D6RHZ5;H7BXG7;O94979-5	34;34;33;33;33;33;33;32;32;26;24;19;15;11;9;8;7;3;2;2;1;1;1	34;34;33;33;33;33;33;32;32;26;24;19;15;11;9;8;7;3;2;2;1;1;1	10;10;9;9;9;9;9;8;8;9;0;8;0;0;0;8;0;0;2;2;1;1;0	Protein transport protein Sec31A	SEC31A	>sp|O94979|SC31A_HUMAN Protein transport protein Sec31A OS=Homo sapiens GN=SEC31A PE=1 SV=3;>tr|D6REX3|D6REX3_HUMAN Protein transport protein Sec31A OS=Homo sapiens GN=SEC31A PE=2 SV=1;>sp|O94979-3|SC31A_HUMAN Isoform 3 of Protein transport protein Sec31A	23	34	34	10	32.4	32.4	9.6	133.01	1220	1220;1251;1106;1181;1200;1205;1233;1067;1166;877;969;509;443;286;237;235;383;181;165;166;81;92;219	0.91196	1.0057	1.0847	1.1278	1.1369	1.1222	1.0524	1.0367	1.1214	0.98746	1.1093	1.0822	1.0856	1.0687	1.2352	1.0354	1.043	1.0756	1.0729	1.249	1.2305	1.1954	1.1798	1.1485	0.97332	1.1353	1.1369	1.0815	1.1876	1.1388	1.2434	1.3844
O95394;D6RF12;E9PF86;J3KN95;D6RCQ8;D6RIS6;D6RF77;H0Y987;H0Y8I3;D6RCD1;D6RC77	O95394;D6RF12;E9PF86;J3KN95	16;16;15;12;5;5;4;4;3;2;2	16;16;15;12;5;5;4;4;3;2;2	16;16;15;12;5;5;4;4;3;2;2	Phosphoacetylglucosamine mutase	PGM3	>sp|O95394|AGM1_HUMAN Phosphoacetylglucosamine mutase OS=Homo sapiens GN=PGM3 PE=1 SV=1;>tr|D6RF12|D6RF12_HUMAN Phosphoacetylglucosamine mutase OS=Homo sapiens GN=PGM3 PE=2 SV=1;>tr|E9PF86|E9PF86_HUMAN Phosphoacetylglucosamine mutase OS=Homo sapiens GN=PGM	11	16	16	16	42.6	42.6	42.6	59.851	542	542;566;570;461;147;173;157;197;113;71;114	0.93488	0.96962	1.0683	1.0641	1.1272	1.0341	1.1595	0.93844	1.0465	0.98498	0.97763	0.97148	1.0632	1.0477	1.1866	1.0341	0.93957	1.0372	NaN	1.4913	0.84041	0.74236	1.1348	1.0478	0.7084	1.1816	1.0766	1.0338	1.2395	1.2402	0.95273	NaN
P27707;D6RFG8;D6RCP9;D6RG38	P27707;D6RFG8;D6RCP9	6;6;5;1	6;6;5;1	6;6;5;1	Deoxycytidine kinase	DCK	>sp|P27707|DCK_HUMAN Deoxycytidine kinase OS=Homo sapiens GN=DCK PE=1 SV=1;>tr|D6RFG8|D6RFG8_HUMAN Deoxycytidine kinase OS=Homo sapiens GN=DCK PE=2 SV=1;>tr|D6RCP9|D6RCP9_HUMAN Deoxycytidine kinase OS=Homo sapiens GN=DCK PE=2 SV=1	4	6	6	6	31.2	31.2	31.2	30.518	260	260;317;199;48	NaN	1.0577	1.0762	1.1204	NaN	NaN	NaN	NaN	NaN	NaN	NaN	NaN	NaN	NaN	NaN	NaN	NaN	1.0793	0.89519	1.1852	NaN	1.4566	1.0953	1.0102	1.07	NaN	NaN	1.2369	0.68685	1.1543	1.2219	0.9198
Q9GZM5;D6RGI4;D6RFI3;E7EQR8;D6RGY8;H0Y9A1;J3KN17;D6RED8	Q9GZM5;D6RGI4;D6RFI3;E7EQR8;D6RGY8;H0Y9A1;J3KN17	5;5;5;5;4;3;3;1	5;5;5;5;4;3;3;1	5;5;5;5;4;3;3;1	Protein YIPF3;Protein YIPF3, 36 kDa form III	YIPF3	>sp|Q9GZM5|YIPF3_HUMAN Protein YIPF3 OS=Homo sapiens GN=YIPF3 PE=1 SV=1;>tr|D6RGI4|D6RGI4_HUMAN Protein YIPF3 OS=Homo sapiens GN=YIPF3 PE=2 SV=1;>tr|D6RFI3|D6RFI3_HUMAN Protein YIPF3 (Fragment) OS=Homo sapiens GN=YIPF3 PE=2 SV=1;>tr|E7EQR8|E7EQR8_HUMAN Pro	8	5	5	5	22	22	22	38.247	350	350;209;262;356;109;136;155;261	NaN	NaN	NaN	NaN	NaN	NaN	NaN	NaN	NaN	NaN	NaN	NaN	NaN	NaN	NaN	NaN	NaN	NaN	NaN	NaN	NaN	NaN	NaN	NaN	NaN	NaN	NaN	NaN	NaN	NaN	NaN	NaN
Q99715;D6RGG3;Q99715-4;Q99715-2;H0Y4P7;H0Y5N9;H0Y991	Q99715;D6RGG3;Q99715-4;Q99715-2	54;54;52;31;12;10;4	54;54;52;31;12;10;4	54;54;52;31;12;10;4	Collagen alpha-1(XII) chain	COL12A1	>sp|Q99715|COCA1_HUMAN Collagen alpha-1(XII) chain OS=Homo sapiens GN=COL12A1 PE=1 SV=2;>tr|D6RGG3|D6RGG3_HUMAN Collagen alpha-1(XII) chain OS=Homo sapiens GN=COL12A1 PE=2 SV=1;>sp|Q99715-4|COCA1_HUMAN Isoform 4 of Collagen alpha-1(XII) chain OS=Homo sapie	7	54	54	54	25.9	25.9	25.9	333.14	3063	3063;3062;2987;1899;638;756;207	0.92379	1.0043	1.0536	1.0585	1.2571	1.0103	1.2229	0.93631	1.0978	1.1087	1.1027	1.1206	1.024	1.1573	1.1397	1.1184	1.0407	0.96258	1.0312	1.1219	1.5132	NaN	1.4237	1.1209	0.95674	1.2792	1.14	1.5673	1.0821	1.304	1.3858	1.6603
P14406;D6RIE3;D6RGV5;H0UI06;D6R9C3	P14406;D6RIE3;D6RGV5;H0UI06;D6R9C3	2;2;2;2;1	2;2;2;2;1	2;2;2;2;1	Cytochrome c oxidase subunit 7A2, mitochondrial	COX7A2	>sp|P14406|CX7A2_HUMAN Cytochrome c oxidase subunit 7A2, mitochondrial OS=Homo sapiens GN=COX7A2 PE=1 SV=1;>tr|D6RIE3|D6RIE3_HUMAN Cytochrome c oxidase subunit 7A2, mitochondrial OS=Homo sapiens GN=COX7A2 PE=4 SV=1;>tr|D6RGV5|D6RGV5_HUMAN Cytochrome c oxid	5	2	2	2	27.7	27.7	27.7	9.3959	83	83;91;103;115;53	NaN	0.67058	NaN	NaN	0.96512	0.72119	NaN	0.57414	0.92189	0.85915	0.83651	NaN	1.021	0.93537	NaN	1.0822	0.76217	NaN	NaN	NaN	NaN	NaN	1.0312	0.90908	0.69191	NaN	NaN	0.9527	NaN	0.99139	NaN	NaN
Q9BS16;D6RHD3;D6RJF0;H0Y9K8;D6RC76;D6RAX0	Q9BS16;D6RHD3;D6RJF0;H0Y9K8	5;5;4;3;2;1	5;5;4;3;2;1	5;5;4;3;2;1	Centromere protein K	CENPK	>sp|Q9BS16|CENPK_HUMAN Centromere protein K OS=Homo sapiens GN=CENPK PE=1 SV=1;>tr|D6RHD3|D6RHD3_HUMAN Centromere protein K OS=Homo sapiens GN=CENPK PE=2 SV=1;>tr|D6RJF0|D6RJF0_HUMAN Centromere protein K OS=Homo sapiens GN=CENPK PE=2 SV=1;>tr|H0Y9K8|H0Y9K8	6	5	5	5	26.4	26.4	26.4	31.655	269	269;239;206;137;176;132	NaN	NaN	NaN	NaN	NaN	NaN	NaN	NaN	NaN	NaN	NaN	NaN	NaN	NaN	NaN	NaN	NaN	NaN	1.1282	1.4767	1.5192	1.1008	1.1	NaN	1.0615	1.2701	1.4336	1.7075	NaN	1.5768	1.5755	1.5012
O00584;H0YAE9;D6RHI9;D6REQ6;O00584-2;J3QQ64	O00584;H0YAE9;D6RHI9;D6REQ6;O00584-2	4;4;4;3;2;1	4;4;4;3;2;1	4;4;4;3;2;1	Ribonuclease T2	RNASET2	>sp|O00584|RNT2_HUMAN Ribonuclease T2 OS=Homo sapiens GN=RNASET2 PE=1 SV=2;>tr|H0YAE9|H0YAE9_HUMAN Uncharacterized protein (Fragment) OS=Homo sapiens PE=3 SV=1;>tr|D6RHI9|D6RHI9_HUMAN Ribonuclease T2 (Fragment) OS=Homo sapiens GN=RNASET2 PE=2 SV=1;>tr|D6RE	6	4	4	4	19.1	19.1	19.1	29.48	256	256;185;254;218;121;71	NaN	NaN	NaN	NaN	NaN	NaN	NaN	NaN	NaN	NaN	NaN	NaN	NaN	NaN	NaN	NaN	NaN	NaN	NaN	NaN	NaN	NaN	NaN	NaN	NaN	NaN	NaN	NaN	NaN	NaN	NaN	NaN
Q6P1K8;Q13888;D6RID8;D6RAW1;D6RIT7;D6RGC9;D6RJD3;J3KQC7;F5GZM1	Q6P1K8;Q13888;D6RID8;D6RAW1;D6RIT7;D6RGC9;D6RJD3;J3KQC7;F5GZM1	2;2;2;1;1;1;1;1;1	2;2;2;1;1;1;1;1;1	2;2;2;1;1;1;1;1;1	General transcription factor IIH subunit 2-like protein;General transcription factor IIH subunit 2	GTF2H2C;GTF2H2	>sp|Q6P1K8|T2H2L_HUMAN General transcription factor IIH subunit 2-like protein OS=Homo sapiens GN=GTF2H2C PE=2 SV=1;>sp|Q13888|TF2H2_HUMAN General transcription factor IIH subunit 2 OS=Homo sapiens GN=GTF2H2 PE=1 SV=1;>tr|D6RID8|D6RID8_HUMAN General transc	9	2	2	2	6.3	6.3	6.3	44.452	395	395;395;253;51;92;123;165;338;338	NaN	NaN	NaN	NaN	NaN	NaN	NaN	NaN	NaN	NaN	NaN	NaN	NaN	NaN	NaN	NaN	NaN	NaN	NaN	NaN	NaN	NaN	NaN	NaN	NaN	NaN	NaN	NaN	NaN	NaN	NaN	NaN
Q8WVV9;Q8WVV9-4;D6W592;Q5JB52;B7WPG3;H7C464;Q8WVV9-3;C9JJZ7;H7C0J6	Q8WVV9;Q8WVV9-4;D6W592;Q5JB52;B7WPG3	18;18;18;17;17;6;6;4;3	17;17;17;16;16;5;6;4;3	11;11;11;11;11;5;0;0;3	Heterogeneous nuclear ribonucleoprotein L-like	HNRNPLL;HNRPLL	>sp|Q8WVV9|HNRLL_HUMAN Heterogeneous nuclear ribonucleoprotein L-like OS=Homo sapiens GN=HNRPLL PE=1 SV=1;>sp|Q8WVV9-4|HNRLL_HUMAN Isoform 4 of Heterogeneous nuclear ribonucleoprotein L-like OS=Homo sapiens GN=HNRPLL;>tr|D6W592|D6W592_HUMAN Heterogeneous n	9	18	17	11	52.8	51.5	35.4	60.082	542	542;537;542;508;508;133;275;149;108	0.78302	0.90133	1.1692	0.76307	1.0691	0.92731	0.92589	0.8895	0.94727	0.98508	1.0248	1.0102	1.0141	0.98601	1.1233	NaN	0.92335	0.96892	1.0668	0.929	0.98628	1.1372	1.1618	1.6208	1.1353	0.95189	0.76034	1.0666	0.8288	0.98673	1.3189	1.25
Q96HN2;Q96HN2-4;Q96HN2-3;D7UEQ7;H0Y8B3;F8W7N8;Q96HN2-2;C9K0S0	Q96HN2;Q96HN2-4;Q96HN2-3;D7UEQ7;H0Y8B3;F8W7N8;Q96HN2-2	13;13;13;13;13;13;13;1	3;3;3;3;3;3;3;1	3;3;3;3;3;3;3;1	Putative adenosylhomocysteinase 3;Adenosylhomocysteinase	AHCYL2	>sp|Q96HN2|SAHH3_HUMAN Putative adenosylhomocysteinase 3 OS=Homo sapiens GN=AHCYL2 PE=1 SV=1;>sp|Q96HN2-4|SAHH3_HUMAN Isoform 4 of Putative adenosylhomocysteinase 3 OS=Homo sapiens GN=AHCYL2;>sp|Q96HN2-3|SAHH3_HUMAN Isoform 3 of Putative adenosylhomocystei	8	13	3	3	22.7	7.5	7.5	66.72	611	611;508;508;509;518;530;610;183	NaN	NaN	NaN	NaN	NaN	NaN	NaN	NaN	NaN	NaN	NaN	NaN	NaN	NaN	NaN	NaN	NaN	NaN	NaN	NaN	NaN	NaN	NaN	NaN	NaN	NaN	NaN	NaN	NaN	NaN	NaN	NaN
Q96BD0;Q96BD0-2;E1P5H9;Q96BD0-3;Q96BD0-4	Q96BD0;Q96BD0-2;E1P5H9;Q96BD0-3;Q96BD0-4	2;2;2;2;2	2;2;2;2;2	2;2;2;2;2	Solute carrier organic anion transporter family member 4A1	SLCO4A1	>sp|Q96BD0|SO4A1_HUMAN Solute carrier organic anion transporter family member 4A1 OS=Homo sapiens GN=SLCO4A1 PE=1 SV=2;>sp|Q96BD0-2|SO4A1_HUMAN Isoform 2 of Solute carrier organic anion transporter family member 4A1 OS=Homo sapiens GN=SLCO4A1;>tr|E1P5H9|E1	5	2	2	2	4	4	4	77.193	722	722;583;620;661;722	NaN	NaN	NaN	NaN	NaN	NaN	NaN	NaN	NaN	NaN	NaN	NaN	NaN	NaN	NaN	NaN	NaN	NaN	NaN	NaN	NaN	NaN	NaN	NaN	NaN	NaN	NaN	NaN	NaN	NaN	NaN	NaN
E2QRD5;P59780;Q7Z6K5;H0YLI7;B4DGQ3;H0YMP5;H0YL03;H0YLX6;H0YN38;H0YMK0;H0YL85	E2QRD5;P59780;Q7Z6K5;H0YLI7	6;3;3;3;1;1;1;1;1;1;1	6;3;3;3;1;1;1;1;1;1;1	6;3;3;3;1;1;1;1;1;1;1	UPF0552 protein C15orf38;AP-3 complex subunit sigma-2	C15orf38;AP3S2	>tr|E2QRD5|E2QRD5_HUMAN Protein C15orf38-AP3S2 OS=Homo sapiens GN=C15orf38-AP3S2 PE=2 SV=1;>sp|P59780|AP3S2_HUMAN AP-3 complex subunit sigma-2 OS=Homo sapiens GN=AP3S2 PE=2 SV=1;>sp|Q7Z6K5|CO038_HUMAN UPF0552 protein C15orf38 OS=Homo sapiens GN=C15orf38 PE	11	6	6	6	15.7	15.7	15.7	43.881	394	394;193;226;205;124;130;136;136;156;184;185	NaN	NaN	NaN	NaN	NaN	NaN	NaN	NaN	NaN	NaN	NaN	NaN	NaN	NaN	NaN	NaN	NaN	NaN	NaN	NaN	NaN	NaN	NaN	NaN	NaN	NaN	NaN	NaN	NaN	NaN	NaN	NaN
O75496;H7C608;E2QRF9;C9K0U5	O75496;H7C608;E2QRF9;C9K0U5	2;2;2;1	2;2;2;1	2;2;2;1	Geminin	GMNN	>sp|O75496|GEMI_HUMAN Geminin OS=Homo sapiens GN=GMNN PE=1 SV=1;>tr|H7C608|H7C608_HUMAN Geminin (Fragment) OS=Homo sapiens GN=GMNN PE=2 SV=1;>tr|E2QRF9|E2QRF9_HUMAN Geminin (Fragment) OS=Homo sapiens GN=GMNN PE=2 SV=1;>tr|C9K0U5|C9K0U5_HUMAN Geminin (Fragm	4	2	2	2	17.7	17.7	17.7	23.565	209	209;102;179;66	NaN	NaN	NaN	NaN	NaN	NaN	NaN	NaN	NaN	NaN	NaN	NaN	NaN	NaN	NaN	NaN	NaN	NaN	NaN	NaN	NaN	NaN	NaN	NaN	NaN	NaN	NaN	NaN	NaN	NaN	NaN	NaN
Q9NYP7;Q9NYP7-3;E2QRH7;Q9NYP7-2	Q9NYP7;Q9NYP7-3;E2QRH7;Q9NYP7-2	1;1;1;1	1;1;1;1	1;1;1;1	Elongation of very long chain fatty acids protein 5	ELOVL5	>sp|Q9NYP7|ELOV5_HUMAN Elongation of very long chain fatty acids protein 5 OS=Homo sapiens GN=ELOVL5 PE=1 SV=1;>sp|Q9NYP7-3|ELOV5_HUMAN Isoform 3 of Elongation of very long chain fatty acids protein 5 OS=Homo sapiens GN=ELOVL5;>tr|E2QRH7|E2QRH7_HUMAN Elong	4	1	1	1	4.3	4.3	4.3	35.293	299	299;88;289;326	NaN	NaN	NaN	NaN	NaN	NaN	NaN	NaN	NaN	NaN	NaN	NaN	NaN	NaN	NaN	NaN	NaN	NaN	NaN	NaN	NaN	NaN	NaN	NaN	NaN	NaN	NaN	NaN	NaN	NaN	NaN	NaN
O75330;E3W978;O75330-4;O75330-2;O75330-3	O75330;E3W978;O75330-4;O75330-2;O75330-3	9;9;9;9;9	9;9;9;9;9	9;9;9;9;9	Hyaluronan mediated motility receptor	HMMR	>sp|O75330|HMMR_HUMAN Hyaluronan mediated motility receptor OS=Homo sapiens GN=HMMR PE=1 SV=2;>tr|E3W978|E3W978_HUMAN Hyaluronan mediated motility receptor OS=Homo sapiens GN=HMMR PE=2 SV=2;>sp|O75330-4|HMMR_HUMAN Isoform 4 of Hyaluronan mediated motility	5	9	9	9	17	17	17	84.099	724	724;610;638;709;725	NaN	NaN	NaN	NaN	NaN	NaN	NaN	NaN	NaN	NaN	NaN	NaN	NaN	NaN	NaN	NaN	NaN	NaN	NaN	NaN	NaN	NaN	NaN	NaN	NaN	NaN	NaN	NaN	NaN	NaN	NaN	NaN
O60313-2;E5KLK1;E5KLJ9;E5KLJ5;O60313;E5KLJ6;H7C3G2;H7C321	O60313-2;E5KLK1;E5KLJ9;E5KLJ5;O60313;E5KLJ6	39;39;39;39;37;37;2;2	39;39;39;39;37;37;2;2	30;30;30;30;28;28;0;2	Dynamin-like 120 kDa protein, mitochondrial;Dynamin-like 120 kDa protein, form S1	OPA1	>sp|O60313-2|OPA1_HUMAN Isoform 2 of Dynamin-like 120 kDa protein, mitochondrial OS=Homo sapiens GN=OPA1;>tr|E5KLK1|E5KLK1_HUMAN Dynamin-like 120 kDa protein, mitochondrial OS=Homo sapiens GN=OPA1 PE=3 SV=1;>tr|E5KLJ9|E5KLJ9_HUMAN Dynamin-like 120 kDa prot	8	39	39	30	43.7	43.7	36.7	115.88	997	997;961;979;1015;960;978;131;185	0.88999	0.87946	0.97	0.72357	0.76724	0.88838	0.92108	0.71152	0.93765	0.85831	0.82994	0.81419	0.63211	0.88421	0.76294	0.88534	0.97579	1.0999	1.061	1.3739	0.97373	0.8976	0.79308	0.98797	0.8978	1.0969	0.96444	0.85464	1.0906	1.1017	0.8192	0.91064
E5RFJ1;Q96MF7	E5RFJ1;Q96MF7	1;1	1;1	1;1	E3 SUMO-protein ligase NSE2	NSMCE2	>tr|E5RFJ1|E5RFJ1_HUMAN E3 SUMO-protein ligase NSE2 OS=Homo sapiens GN=NSMCE2 PE=2 SV=1;>sp|Q96MF7|NSE2_HUMAN E3 SUMO-protein ligase NSE2 OS=Homo sapiens GN=NSMCE2 PE=1 SV=2	2	1	1	1	7.5	7.5	7.5	21.807	187	187;247	NaN	NaN	NaN	NaN	NaN	NaN	NaN	NaN	NaN	NaN	NaN	NaN	NaN	NaN	NaN	NaN	NaN	NaN	NaN	NaN	NaN	NaN	NaN	NaN	NaN	NaN	NaN	NaN	NaN	NaN	NaN	NaN
Q6P1N9;E5RG17;G5EA19;Q6P1N9-2;H0YBX2;E5RGF2;E5RK70;E5RG62;E5RI69;E5RID7;E5RJY6	Q6P1N9;E5RG17;G5EA19;Q6P1N9-2;H0YBX2;E5RGF2;E5RK70	9;9;8;8;7;7;5;4;1;1;1	9;9;8;8;7;7;5;4;1;1;1	9;9;8;8;7;7;5;4;1;1;1	Putative deoxyribonuclease TATDN1	TATDN1	>sp|Q6P1N9|TATD1_HUMAN Putative deoxyribonuclease TATDN1 OS=Homo sapiens GN=TATDN1 PE=1 SV=2;>tr|E5RG17|E5RG17_HUMAN Putative deoxyribonuclease TATDN1 (Fragment) OS=Homo sapiens GN=TATDN1 PE=2 SV=1;>tr|G5EA19|G5EA19_HUMAN Putative deoxyribonuclease TATDN1	11	9	9	9	36.7	36.7	36.7	33.601	297	297;322;207;250;202;210;110;93;56;62;75	NaN	NaN	NaN	NaN	NaN	NaN	NaN	NaN	NaN	NaN	NaN	NaN	NaN	NaN	NaN	NaN	NaN	NaN	NaN	NaN	NaN	NaN	NaN	NaN	NaN	NaN	1.5016	NaN	NaN	NaN	NaN	NaN
O00244;E5RGN3;E5RIM7	O00244;E5RGN3;E5RIM7	7;7;7	7;7;7	7;7;7	Copper transport protein ATOX1	ATOX1	>sp|O00244|ATOX1_HUMAN Copper transport protein ATOX1 OS=Homo sapiens GN=ATOX1 PE=1 SV=1;>tr|E5RGN3|E5RGN3_HUMAN Copper transport protein ATOX1 OS=Homo sapiens GN=ATOX1 PE=4 SV=1;>tr|E5RIM7|E5RIM7_HUMAN Copper transport protein ATOX1 OS=Homo sapiens GN=ATO	3	7	7	7	51.5	51.5	51.5	7.4016	68	68;59;73	0.82073	1.0698	1.0179	1.0487	1.0665	1.1723	1.0802	1.0603	0.94514	1.1983	1.264	1.2733	1.2541	1.259	1.3223	1.0512	1.1699	1.1975	1.2256	1.3084	1.2485	1.3559	1.1418	1.1163	1.3417	1.163	1.2469	1.2361	1.4303	1.1991	1.1022	1.3227
Q9H446;E5RGQ3;Q9H446-2;E5RGS5;E5RJE3	Q9H446;E5RGQ3;Q9H446-2;E5RGS5	3;3;3;2;1	3;3;3;2;1	3;3;3;2;1	RWD domain-containing protein 1	RWDD1	>sp|Q9H446|RWDD1_HUMAN RWD domain-containing protein 1 OS=Homo sapiens GN=RWDD1 PE=1 SV=1;>tr|E5RGQ3|E5RGQ3_HUMAN RWD domain-containing protein 1 (Fragment) OS=Homo sapiens GN=RWDD1 PE=2 SV=1;>sp|Q9H446-2|RWDD1_HUMAN Isoform 2 of RWD domain-containing prot	5	3	3	3	15.2	15.2	15.2	27.939	243	243;72;147;67;51	NaN	NaN	1.1701	NaN	1.2629	NaN	1.4093	1.3641	1.1676	0.99898	1.0601	1.1167	1.2278	1.1307	1.5474	NaN	1.1681	1.3245	NaN	NaN	1.3996	NaN	1.5052	NaN	1.0304	NaN	1.3537	NaN	NaN	NaN	1.3273	NaN
O60925;E5RGS4;D6RGG5	O60925;E5RGS4	6;6;2	6;6;2	6;6;2	Prefoldin subunit 1	PFDN1	>sp|O60925|PFD1_HUMAN Prefoldin subunit 1 OS=Homo sapiens GN=PFDN1 PE=1 SV=2;>tr|E5RGS4|E5RGS4_HUMAN Prefoldin subunit 1 OS=Homo sapiens GN=PFDN1 PE=2 SV=1	3	6	6	6	37.7	37.7	37.7	14.21	122	122;117;35	1.0266	1.1329	0.8665	0.93153	0.83422	0.88606	0.8234	1.1681	1.0244	0.91323	0.91501	0.9364	1.0516	NaN	1.2153	0.90726	1.1232	0.96615	NaN	1.0674	1.0899	0.9762	NaN	1.1605	0.79037	1.0028	1.1132	0.98709	NaN	NaN	NaN	NaN
Q93045;E5RGX5;Q93045-2	Q93045;E5RGX5;Q93045-2	2;2;2	1;1;1	1;1;1	Stathmin-2;Stathmin	STMN2	>sp|Q93045|STMN2_HUMAN Stathmin-2 OS=Homo sapiens GN=STMN2 PE=1 SV=3;>tr|E5RGX5|E5RGX5_HUMAN Stathmin OS=Homo sapiens GN=STMN2 PE=2 SV=1;>sp|Q93045-2|STMN2_HUMAN Isoform 2 of Stathmin-2 OS=Homo sapiens GN=STMN2	3	2	1	1	10.6	5.6	5.6	20.828	179	179;168;187	NaN	NaN	NaN	NaN	NaN	NaN	NaN	NaN	NaN	NaN	NaN	NaN	NaN	NaN	NaN	NaN	NaN	NaN	NaN	NaN	NaN	NaN	NaN	NaN	NaN	NaN	NaN	NaN	NaN	NaN	NaN	NaN
Q15369;E5RHG8;Q15369-2;E5RJ89	Q15369;E5RHG8;Q15369-2;E5RJ89	6;6;5;3	6;6;5;3	6;6;5;3	Transcription elongation factor B polypeptide 1	TCEB1	>sp|Q15369|ELOC_HUMAN Transcription elongation factor B polypeptide 1 OS=Homo sapiens GN=TCEB1 PE=1 SV=1;>tr|E5RHG8|E5RHG8_HUMAN Transcription elongation factor B polypeptide 1 (Fragment) OS=Homo sapiens GN=TCEB1 PE=2 SV=1;>sp|Q15369-2|ELOC_HUMAN Isoform 2	4	6	6	6	57.1	57.1	57.1	12.473	112	112;89;96;99	0.98336	1.1449	1.1194	1.1021	1.0812	1.0775	1.1729	1.0541	1.076	1.0518	1.1035	1.1	1.0543	1.1606	1.1796	1.0355	1.1002	1.0903	1.0701	1.2079	1.1506	1.1154	1.1421	1.3123	0.88841	1.1592	1.1395	1.1864	1.1703	1.2241	1.1933	1.1783
O94905;E5RHW4;E5RJ09;O94905-2;O94905-3	O94905;E5RHW4	14;14;5;3;3	14;14;5;3;3	13;13;5;2;2	Erlin-2	ERLIN2	>sp|O94905|ERLN2_HUMAN Erlin-2 OS=Homo sapiens GN=ERLIN2 PE=1 SV=1;>tr|E5RHW4|E5RHW4_HUMAN Erlin-2 (Fragment) OS=Homo sapiens GN=ERLIN2 PE=2 SV=1	5	14	14	13	46.3	46.3	42.8	37.839	339	339;338;197;152;206	0.87233	1.0107	1.0627	0.92421	1.0504	0.87525	1.0984	1.1223	1.0963	1.1078	1.0718	1.1439	1.1238	1.119	1.1303	1.109	0.99954	1.1467	1.0498	1.2898	1.1337	1.042	1.2873	1.1168	0.93066	1.1342	1.176	1.1478	1.1638	1.0794	1.0951	1.1432
O43513;E5RIE8	O43513;E5RIE8	2;2	2;2	2;2	Mediator of RNA polymerase II transcription subunit 7	MED7	>sp|O43513|MED7_HUMAN Mediator of RNA polymerase II transcription subunit 7 OS=Homo sapiens GN=MED7 PE=1 SV=1;>tr|E5RIE8|E5RIE8_HUMAN Mediator of RNA polymerase II transcription subunit 7 (Fragment) OS=Homo sapiens GN=MED7 PE=2 SV=1	2	2	2	2	16.3	16.3	16.3	27.245	233	233;195	NaN	NaN	NaN	NaN	NaN	NaN	NaN	NaN	NaN	NaN	NaN	NaN	NaN	NaN	NaN	NaN	NaN	NaN	NaN	NaN	NaN	NaN	NaN	NaN	NaN	NaN	NaN	NaN	NaN	NaN	NaN	NaN
Q6NXR4;E5RIH5;E5RIZ0;E5RH83;E5RHM7	Q6NXR4;E5RIH5;E5RIZ0;E5RH83	3;3;3;2;1	3;3;3;2;1	3;3;3;2;1	TELO2-interacting protein 2	TTI2	>sp|Q6NXR4|TTI2_HUMAN TELO2-interacting protein 2 OS=Homo sapiens GN=TTI2 PE=1 SV=1;>tr|E5RIH5|E5RIH5_HUMAN TELO2-interacting protein 2 OS=Homo sapiens GN=TTI2 PE=2 SV=1;>tr|E5RIZ0|E5RIZ0_HUMAN TELO2-interacting protein 2 OS=Homo sapiens GN=TTI2 PE=2 SV=1;	5	3	3	3	7.5	7.5	7.5	56.914	508	508;477;497;343;101	NaN	NaN	NaN	NaN	NaN	NaN	NaN	NaN	NaN	NaN	NaN	NaN	NaN	NaN	NaN	NaN	NaN	NaN	NaN	NaN	NaN	NaN	NaN	NaN	NaN	NaN	NaN	NaN	NaN	NaN	NaN	NaN
E5RIQ5;Q9BX73-2;Q9BX73	E5RIQ5;Q9BX73-2;Q9BX73	1;1;1	1;1;1	1;1;1	TM2 domain-containing protein 2	TM2D2	>tr|E5RIQ5|E5RIQ5_HUMAN TM2 domain-containing protein 2 (Fragment) OS=Homo sapiens GN=TM2D2 PE=2 SV=1;>sp|Q9BX73-2|TM2D2_HUMAN Isoform 2 of TM2 domain-containing protein 2 OS=Homo sapiens GN=TM2D2;>sp|Q9BX73|TM2D2_HUMAN TM2 domain-containing protein 2 OS=H	3	1	1	1	23.1	23.1	23.1	13.662	121	121;171;214	NaN	NaN	NaN	NaN	NaN	NaN	NaN	NaN	NaN	NaN	NaN	NaN	NaN	NaN	NaN	NaN	NaN	NaN	NaN	NaN	NaN	NaN	NaN	NaN	NaN	NaN	NaN	NaN	NaN	NaN	NaN	NaN
O75347;E5RIW3;E5RJD8;B4DT30;E5RIX8	O75347;E5RIW3;E5RJD8;B4DT30;E5RIX8	13;13;13;9;7	13;13;13;9;7	9;9;9;5;3	Tubulin-specific chaperone A	TBCA	>sp|O75347|TBCA_HUMAN Tubulin-specific chaperone A OS=Homo sapiens GN=TBCA PE=1 SV=3;>tr|E5RIW3|E5RIW3_HUMAN Tubulin-specific chaperone A OS=Homo sapiens GN=TBCA PE=2 SV=1;>tr|E5RJD8|E5RJD8_HUMAN Tubulin-specific chaperone A OS=Homo sapiens GN=TBCA PE=2 SV	5	13	13	9	61.1	61.1	49.1	12.855	108	108;84;119;129;79	0.8583	1.0485	1.0846	1.0215	1.0931	1.1447	1.1355	1.0214	1.1607	1.124	1.2068	1.0579	1.1696	1.0931	1.242	1.0241	1.0033	1.1661	0.99306	0.98059	1.184	1.0834	1.1936	1.0904	0.91537	1.059	1.1	1.2906	1.2529	1.0945	1.2744	1.2397
Q13884;E5RIX7;Q13884-2	Q13884;E5RIX7;Q13884-2	1;1;1	1;1;1	1;1;1	Beta-1-syntrophin	SNTB1	>sp|Q13884|SNTB1_HUMAN Beta-1-syntrophin OS=Homo sapiens GN=SNTB1 PE=1 SV=3;>tr|E5RIX7|E5RIX7_HUMAN Beta-1-syntrophin (Fragment) OS=Homo sapiens GN=SNTB1 PE=2 SV=1;>sp|Q13884-2|SNTB1_HUMAN Isoform 2 of Beta-1-syntrophin OS=Homo sapiens GN=SNTB1	3	1	1	1	3.3	3.3	3.3	58.06	538	538;28;382	NaN	NaN	NaN	NaN	NaN	NaN	NaN	NaN	NaN	NaN	NaN	NaN	NaN	NaN	NaN	NaN	NaN	NaN	NaN	NaN	NaN	NaN	NaN	NaN	NaN	NaN	NaN	NaN	NaN	NaN	NaN	NaN
O00203;E5RJ68;F5GYB0;H0YBD0;F5GWU4	O00203;E5RJ68	34;34;2;2;2	34;34;2;2;2	28;28;0;2;0	AP-3 complex subunit beta-1	AP3B1	>sp|O00203|AP3B1_HUMAN AP-3 complex subunit beta-1 OS=Homo sapiens GN=AP3B1 PE=1 SV=3;>tr|E5RJ68|E5RJ68_HUMAN AP-3 complex subunit beta-1 OS=Homo sapiens GN=AP3B1 PE=2 SV=1	5	34	34	28	34.6	34.6	28.7	121.32	1094	1094;1045;141;154;193	0.89704	1.1555	1.1912	1.0303	1.1206	1.1709	1.1255	1.0491	1.1479	1.1415	1.0915	1.129	1.1222	1.1953	1.2692	1.1026	1.0703	1.1268	1.02	1.3795	1.1133	1.0891	1.02	0.9767	0.85149	1.0863	1.0654	1.1432	1.2098	0.95359	1.1226	1.1326
Q9NUL3;Q9NUL3-4;E5RJN7;Q9NUL3-6;Q9NUL3-8;Q9NUL3-3;F8VPI7;E7EPX0;Q9NUL3-7;E7EVJ4;Q9NUL3-2;E9PH62;G5EA18;E7EVI1;E5RJ67;H0YBY0;E5RFK1	Q9NUL3;Q9NUL3-4;E5RJN7;Q9NUL3-6;Q9NUL3-8;Q9NUL3-3;F8VPI7;E7EPX0;Q9NUL3-7;E7EVJ4;Q9NUL3-2;E9PH62;G5EA18;E7EVI1	7;7;7;7;7;7;7;7;7;7;7;7;6;6;2;1;1	7;7;7;7;7;7;7;7;7;7;7;7;6;6;2;1;1	7;7;7;7;7;7;7;7;7;7;7;7;6;6;2;1;1	Double-stranded RNA-binding protein Staufen homolog 2	STAU2	>sp|Q9NUL3|STAU2_HUMAN Double-stranded RNA-binding protein Staufen homolog 2 OS=Homo sapiens GN=STAU2 PE=1 SV=1;>sp|Q9NUL3-4|STAU2_HUMAN Isoform 4 of Double-stranded RNA-binding protein Staufen homolog 2 OS=Homo sapiens GN=STAU2;>tr|E5RJN7|E5RJN7_HUMAN Dou	17	7	7	7	14	14	14	62.64	570	570;314;320;398;473;479;479;491;504;511;538;538;291;390;135;162;204	NaN	NaN	NaN	NaN	NaN	NaN	NaN	NaN	NaN	NaN	NaN	NaN	NaN	NaN	NaN	NaN	NaN	NaN	NaN	NaN	NaN	NaN	NaN	NaN	NaN	NaN	NaN	NaN	NaN	NaN	NaN	NaN
P63208;E5RJR5;E7ERH2;F8W8N3;P63208-2;E5RGM3;E5RI56	P63208;E5RJR5;E7ERH2;F8W8N3;P63208-2;E5RGM3	13;13;9;9;9;7;2	13;13;9;9;9;7;2	13;13;9;9;9;7;2	S-phase kinase-associated protein 1	SKP1	>sp|P63208|SKP1_HUMAN S-phase kinase-associated protein 1 OS=Homo sapiens GN=SKP1 PE=1 SV=2;>tr|E5RJR5|E5RJR5_HUMAN S-phase kinase-associated protein 1 OS=Homo sapiens GN=SKP1 PE=2 SV=1;>tr|E7ERH2|E7ERH2_HUMAN S-phase kinase-associated protein 1 (Fragment)	7	13	13	13	65.6	65.6	65.6	18.658	163	163;163;142;158;160;102;91	0.88609	1.4401	1.3569	1.4702	1.325	1.424	1.2395	1.0782	1.3822	1.2658	1.3195	1.3073	1.2718	1.3941	1.3822	1.285	1.3998	1.4447	1.0041	1.3521	1.1562	1.0996	1.2194	1.3674	0.91312	1.1104	1.309	1.306	1.1039	0.94727	1.1442	1.33
Q15390;E5RJS5;H0YBZ4;E7EP84;E5RIB6	Q15390;E5RJS5;H0YBZ4;E7EP84	3;3;2;2;1	3;3;2;2;1	3;3;2;2;1	Mitochondrial fission regulator 1	MTFR1	>sp|Q15390|MTFR1_HUMAN Mitochondrial fission regulator 1 OS=Homo sapiens GN=MTFR1 PE=1 SV=2;>tr|E5RJS5|E5RJS5_HUMAN Mitochondrial fission regulator 1 OS=Homo sapiens GN=MTFR1 PE=4 SV=1;>tr|H0YBZ4|H0YBZ4_HUMAN Mitochondrial fission regulator 1 (Fragment) OS	5	3	3	3	12	12	12	37	333	333;317;291;300;56	NaN	NaN	NaN	NaN	NaN	NaN	NaN	NaN	NaN	NaN	NaN	NaN	NaN	NaN	NaN	NaN	NaN	NaN	NaN	NaN	NaN	NaN	NaN	NaN	NaN	NaN	NaN	NaN	NaN	NaN	NaN	NaN
Q7L5N1;E7EM64;H7C3T0	Q7L5N1;E7EM64	10;10;2	10;10;2	10;10;2	COP9 signalosome complex subunit 6	COPS6	>sp|Q7L5N1|CSN6_HUMAN COP9 signalosome complex subunit 6 OS=Homo sapiens GN=COPS6 PE=1 SV=1;>tr|E7EM64|E7EM64_HUMAN COP9 signalosome complex subunit 6 OS=Homo sapiens GN=COPS6 PE=2 SV=1	3	10	10	10	50.8	50.8	50.8	36.163	327	327;326;123	0.96058	NaN	1.0373	0.84287	1.1355	1.0788	1.1208	0.88134	1.2887	1.0484	0.96872	1.0249	NaN	1.0876	1.2056	0.691	1.0027	1.2672	1.0703	1.3203	1.0795	1.1098	1.2344	1.2102	0.89686	1.0037	1.0277	0.96716	1.0979	1.2653	1.0435	1.0078
Q99942;E9PN08;E7EM95	Q99942;E9PN08;E7EM95	1;1;1	1;1;1	1;1;1	E3 ubiquitin-protein ligase RNF5	RNF5	>sp|Q99942|RNF5_HUMAN E3 ubiquitin-protein ligase RNF5 OS=Homo sapiens GN=RNF5 PE=1 SV=1;>tr|E9PN08|E9PN08_HUMAN E3 ubiquitin-protein ligase RNF5 OS=Homo sapiens GN=RNF5 PE=2 SV=1;>tr|E7EM95|E7EM95_HUMAN E3 ubiquitin-protein ligase RNF5 OS=Homo sapiens GN=	3	1	1	1	9.4	9.4	9.4	19.881	180	180;91;182	NaN	NaN	NaN	NaN	NaN	NaN	NaN	NaN	NaN	NaN	NaN	NaN	NaN	NaN	NaN	NaN	NaN	NaN	NaN	NaN	NaN	NaN	NaN	NaN	NaN	NaN	NaN	NaN	NaN	NaN	NaN	NaN
O95208;O95208-2;F6PQP6;E9PBC1;E7EMC3;I3L2B2;E9PBC2;O95208-3;J3KSF8;J3KTF6;J3QRG9;J3KSA6;J3KSC7;J3QLN2	O95208;O95208-2;F6PQP6;E9PBC1;E7EMC3;I3L2B2;E9PBC2;O95208-3	4;4;4;4;4;4;4;3;1;1;1;1;1;1	4;4;4;4;4;4;4;3;1;1;1;1;1;1	4;4;4;4;4;4;4;3;1;1;1;1;1;1	Epsin-2	EPN2	>sp|O95208|EPN2_HUMAN Epsin-2 OS=Homo sapiens GN=EPN2 PE=1 SV=3;>sp|O95208-2|EPN2_HUMAN Isoform 2 of Epsin-2 OS=Homo sapiens GN=EPN2;>tr|F6PQP6|F6PQP6_HUMAN Epsin-2 (Fragment) OS=Homo sapiens GN=EPN2 PE=2 SV=1;>tr|E9PBC1|E9PBC1_HUMAN Epsin-2 OS=Homo sapien	14	4	4	4	8.9	8.9	8.9	68.481	641	641;583;410;484;499;577;584;544;32;38;39;62;75;95	NaN	NaN	NaN	NaN	NaN	NaN	NaN	NaN	NaN	NaN	NaN	NaN	NaN	NaN	NaN	NaN	NaN	NaN	NaN	NaN	NaN	NaN	NaN	NaN	NaN	NaN	NaN	NaN	NaN	NaN	NaN	NaN
E7EMC7;E3W990;E9PFW8;C9JRJ8;D6RBF1;C9J6J8	E7EMC7;E3W990;E9PFW8	12;7;6;5;3;3	1;0;0;0;0;0	1;0;0;0;0;0		SQSTM1	>tr|E7EMC7|E7EMC7_HUMAN Sequestosome-1 OS=Homo sapiens GN=SQSTM1 PE=2 SV=1;>tr|E3W990|E3W990_HUMAN Sequestosome-1 (Fragment) OS=Homo sapiens GN=SQSTM1 PE=2 SV=1;>tr|E9PFW8|E9PFW8_HUMAN Sequestosome-1 (Fragment) OS=Homo sapiens GN=SQSTM1 PE=2 SV=1	6	12	1	1	51.1	3.2	3.2	41.013	378	378;190;167;140;69;73	NaN	NaN	NaN	NaN	NaN	NaN	NaN	NaN	NaN	0.83147	0.97899	NaN	NaN	NaN	NaN	NaN	NaN	NaN	NaN	NaN	NaN	NaN	NaN	NaN	NaN	NaN	NaN	NaN	NaN	NaN	NaN	NaN
O43572;E7EMD6	O43572;E7EMD6	1;1	1;1	1;1	A-kinase anchor protein 10, mitochondrial	AKAP10	>sp|O43572|AKA10_HUMAN A-kinase anchor protein 10, mitochondrial OS=Homo sapiens GN=AKAP10 PE=1 SV=2;>tr|E7EMD6|E7EMD6_HUMAN A-kinase anchor protein 10, mitochondrial (Fragment) OS=Homo sapiens GN=AKAP10 PE=2 SV=2	2	1	1	1	3.2	3.2	3.2	73.817	662	662;604	NaN	NaN	NaN	NaN	NaN	NaN	NaN	NaN	NaN	NaN	NaN	NaN	NaN	NaN	NaN	NaN	NaN	NaN	NaN	NaN	NaN	NaN	NaN	NaN	NaN	NaN	NaN	NaN	NaN	NaN	NaN	NaN
Q14254;J3QLD9;E7EMK3;K7EKW9	Q14254;J3QLD9;E7EMK3	17;17;17;8	17;17;17;8	17;17;17;8	Flotillin-2	FLOT2	>sp|Q14254|FLOT2_HUMAN Flotillin-2 OS=Homo sapiens GN=FLOT2 PE=1 SV=2;>tr|J3QLD9|J3QLD9_HUMAN Flotillin-2 OS=Homo sapiens GN=FLOT2 PE=4 SV=1;>tr|E7EMK3|E7EMK3_HUMAN Flotillin-2 OS=Homo sapiens GN=FLOT2 PE=2 SV=1	4	17	17	17	46.3	46.3	46.3	47.064	428	428;428;483;249	NaN	1.226	0.90451	NaN	NaN	0.59671	NaN	NaN	NaN	NaN	0.84401	NaN	NaN	NaN	NaN	0.81913	NaN	NaN	NaN	1.1201	1.0821	NaN	NaN	1.0491	0.42083	NaN	NaN	NaN	NaN	1.4088	0.90849	1.0322
Q13510;E7EMM4;Q13510-3;Q13510-2;E7ERV9	Q13510;E7EMM4;Q13510-3;Q13510-2;E7ERV9	3;3;3;3;2	3;3;3;3;2	3;3;3;3;2	Acid ceramidase;Acid ceramidase subunit alpha;Acid ceramidase subunit beta	ASAH1	>sp|Q13510|ASAH1_HUMAN Acid ceramidase OS=Homo sapiens GN=ASAH1 PE=1 SV=5;>tr|E7EMM4|E7EMM4_HUMAN Acid ceramidase OS=Homo sapiens GN=ASAH1 PE=2 SV=1;>sp|Q13510-3|ASAH1_HUMAN Isoform 3 of Acid ceramidase OS=Homo sapiens GN=ASAH1;>sp|Q13510-2|ASAH1_HUMAN Iso	5	3	3	3	8.4	8.4	8.4	44.659	395	395;370;389;411;305	NaN	NaN	NaN	NaN	NaN	NaN	NaN	NaN	NaN	NaN	NaN	NaN	NaN	NaN	NaN	NaN	NaN	NaN	NaN	NaN	NaN	NaN	NaN	NaN	NaN	NaN	NaN	NaN	NaN	NaN	NaN	NaN
Q96FZ2;E7EMP6;D6R9T3;D6RGK7;D6RAZ3;D6RAI0	Q96FZ2;E7EMP6;D6R9T3;D6RGK7;D6RAZ3	8;8;6;4;4;3	8;8;6;4;4;3	8;8;6;4;4;3	UPF0361 protein C3orf37	C3orf37	>sp|Q96FZ2|CC037_HUMAN UPF0361 protein C3orf37 OS=Homo sapiens GN=C3orf37 PE=1 SV=1;>tr|E7EMP6|E7EMP6_HUMAN UPF0361 protein C3orf37 OS=Homo sapiens GN=C3orf37 PE=2 SV=1;>tr|D6R9T3|D6R9T3_HUMAN UPF0361 protein C3orf37 (Fragment) OS=Homo sapiens GN=C3orf37 P	6	8	8	8	31.1	31.1	31.1	40.574	354	354;312;282;183;233;140	NaN	NaN	NaN	NaN	NaN	NaN	NaN	NaN	NaN	NaN	NaN	NaN	NaN	NaN	NaN	NaN	NaN	NaN	1.1582	NaN	NaN	NaN	NaN	NaN	NaN	NaN	NaN	NaN	NaN	NaN	NaN	NaN
P43357;E7EMU0	P43357;E7EMU0	1;1	1;1	1;1	Melanoma-associated antigen 3	MAGEA3	>sp|P43357|MAGA3_HUMAN Melanoma-associated antigen 3 OS=Homo sapiens GN=MAGEA3 PE=1 SV=1;>tr|E7EMU0|E7EMU0_HUMAN Melanoma-associated antigen 3 (Fragment) OS=Homo sapiens GN=MAGEA3 PE=2 SV=1	2	1	1	1	3.5	3.5	3.5	34.747	314	314;198	NaN	NaN	NaN	NaN	NaN	NaN	NaN	NaN	NaN	NaN	NaN	NaN	NaN	NaN	NaN	NaN	NaN	NaN	NaN	NaN	NaN	NaN	NaN	NaN	NaN	NaN	NaN	NaN	NaN	NaN	NaN	NaN
E7EMZ9;O95359-3;E9PBC6;O95359;O95359-2;Q4VXL4;O95359-6;D6RAA5;O95359-1;Q4VXL8;O95359-5;H0Y9C3;H0Y911;E9PGB3;H0Y9Y7;O75410-5;O75410-4;O75410-6;E7EVI4;E7ET87;O75410-3;O75410-7;O75410-8;B4E3H6;H0YBT8;H0YAY0	E7EMZ9;O95359-3;E9PBC6;O95359	41;41;41;40;16;16;15;15;15;15;15;6;6;3;2;2;2;2;2;2;2;2;1;1;1;1	41;41;41;40;16;16;15;15;15;15;15;6;6;3;2;2;2;2;2;2;2;2;1;1;1;1	39;39;39;38;14;14;13;13;13;13;13;5;6;3;2;0;0;0;0;0;0;0;0;0;0;0	Transforming acidic coiled-coil-containing protein 2	TACC2	>tr|E7EMZ9|E7EMZ9_HUMAN Transforming acidic coiled-coil-containing protein 2 OS=Homo sapiens GN=TACC2 PE=2 SV=1;>sp|O95359-3|TACC2_HUMAN Isoform 3 of Transforming acidic coiled-coil-containing protein 2 OS=Homo sapiens GN=TACC2;>tr|E9PBC6|E9PBC6_HUMAN Tran	26	41	41	39	24.6	24.6	24.3	296.74	2826	2826;2871;2875;2948;571;575;996;1008;1026;1038;1094;153;409;669;165;367;379;395;581;609;610;731;154;242;454;562	1.0916	1.0065	1.1855	1.1532	1.1118	1.1367	1.2335	0.95046	0.98398	0.93784	1.1307	0.9872	0.95286	1.1495	1.356	1.1935	1.0362	1.0389	0.98526	1.1497	1.0689	1.0794	1.1545	1.1382	0.81103	1.1312	1.0984	1.1033	1.1077	1.4024	1.1649	1.1666
O95819;E7ENQ1;H7C360;E7EN19;O95819-5;O95819-4;G3XAA2;O95819-2;E7ESS2;O95819-3;G5E948;E7EX83;C9J840;H7C0P6	O95819;E7ENQ1;H7C360;E7EN19;O95819-5;O95819-4;G3XAA2;O95819-2;E7ESS2;O95819-3;G5E948;E7EX83;C9J840;H7C0P6	11;11;11;11;10;10;10;10;10;10;10;9;8;8	5;5;5;5;4;4;4;4;4;4;4;4;3;4	5;5;5;5;4;4;4;4;4;4;4;4;3;4	Mitogen-activated protein kinase kinase kinase kinase 4	MAP4K4	>sp|O95819|M4K4_HUMAN Mitogen-activated protein kinase kinase kinase kinase 4 OS=Homo sapiens GN=MAP4K4 PE=1 SV=2;>tr|E7ENQ1|E7ENQ1_HUMAN Mitogen-activated protein kinase kinase kinase kinase 4 OS=Homo sapiens GN=MAP4K4 PE=2 SV=1;>tr|H7C360|H7C360_HUMAN Mi	14	11	5	5	10.5	6.1	6.1	142.1	1239	1239;1154;1170;1272;1242;1165;1166;1211;1279;1319;1320;1038;1042;1056	NaN	NaN	NaN	NaN	NaN	NaN	NaN	NaN	NaN	NaN	NaN	NaN	NaN	NaN	NaN	NaN	NaN	NaN	NaN	NaN	NaN	NaN	NaN	NaN	NaN	NaN	NaN	NaN	NaN	NaN	NaN	NaN
E7EN22;O94966-6;O94966-5;O94966;O94966-3;O94966-4;E7EST9;B5MEG5;E7ESU0;O94966-2;C9J8M4	E7EN22;O94966-6;O94966-5;O94966;O94966-3;O94966-4;E7EST9;B5MEG5;E7ESU0	13;13;13;12;12;12;11;11;9;6;5	13;13;13;12;12;12;11;11;9;6;5	13;13;13;12;12;12;11;11;9;6;5	Ubiquitin carboxyl-terminal hydrolase 19;Ubiquitin carboxyl-terminal hydrolase	USP19	>tr|E7EN22|E7EN22_HUMAN Ubiquitin carboxyl-terminal hydrolase OS=Homo sapiens GN=USP19 PE=2 SV=1;>sp|O94966-6|UBP19_HUMAN Isoform 6 of Ubiquitin carboxyl-terminal hydrolase 19 OS=Homo sapiens GN=USP19;>sp|O94966-5|UBP19_HUMAN Isoform 5 of Ubiquitin carboxy	11	13	13	13	17.3	17.3	17.3	150.66	1372	1372;1404;1419;1318;1281;1268;1321;1358;1089;660;569	NaN	NaN	NaN	2.3774	NaN	0.93122	NaN	0.71144	NaN	1.578	1.0089	1.3942	1.1799	NaN	1.284	1.7582	1.3154	1.0935	NaN	NaN	1.236	1.1755	1.0196	NaN	NaN	NaN	1.4851	NaN	1.1843	NaN	1.5208	NaN
O00255;O00255-2;E7EN32;O00255-3;E7EPR4;E7ET29	O00255;O00255-2;E7EN32;O00255-3	5;5;5;5;1;1	5;5;5;5;1;1	5;5;5;5;1;1	Menin	MEN1	>sp|O00255|MEN1_HUMAN Menin OS=Homo sapiens GN=MEN1 PE=1 SV=4;>sp|O00255-2|MEN1_HUMAN Isoform 2 of Menin OS=Homo sapiens GN=MEN1;>tr|E7EN32|E7EN32_HUMAN Menin OS=Homo sapiens GN=MEN1 PE=2 SV=1;>sp|O00255-3|MEN1_HUMAN Isoform 3 of Menin OS=Homo sapiens GN=M	6	5	5	5	11.1	11.1	11.1	68.023	615	615;610;555;575;281;346	NaN	NaN	NaN	NaN	NaN	NaN	NaN	NaN	NaN	NaN	NaN	NaN	NaN	NaN	NaN	NaN	NaN	NaN	NaN	NaN	NaN	NaN	NaN	NaN	NaN	NaN	NaN	NaN	NaN	NaN	NaN	NaN
Q53H47;E7EN68;B9ZVV8	Q53H47;E7EN68;B9ZVV8	5;5;3	5;5;3	5;5;3	Histone-lysine N-methyltransferase SETMAR;Histone-lysine N-methyltransferase;Mariner transposase Hsmar1	SETMAR	>sp|Q53H47|SETMR_HUMAN Histone-lysine N-methyltransferase SETMAR OS=Homo sapiens GN=SETMAR PE=1 SV=1;>tr|E7EN68|E7EN68_HUMAN Histone-lysine N-methyltransferase OS=Homo sapiens GN=SETMAR PE=2 SV=1;>tr|B9ZVV8|B9ZVV8_HUMAN Histone-lysine N-methyltransferase (	3	5	5	5	9.1	9.1	9.1	76.668	671	671;545;212	NaN	NaN	NaN	NaN	NaN	NaN	NaN	NaN	NaN	NaN	NaN	NaN	NaN	NaN	NaN	NaN	NaN	NaN	NaN	NaN	NaN	NaN	NaN	NaN	NaN	NaN	NaN	NaN	NaN	NaN	NaN	NaN
Q8IZA0;Q8IZA0-2;E7EN73;C9J519;Q8IZA0-3;B1AN15;C9JQ56;C9JVB2;H0Y4S8;B4DYG9;E7ETQ9	Q8IZA0;Q8IZA0-2;E7EN73;C9J519;Q8IZA0-3;B1AN15	8;8;8;5;5;4;1;1;1;1;1	8;8;8;5;5;4;1;1;1;1;1	8;8;8;5;5;4;1;1;1;1;1	Dyslexia-associated protein KIAA0319-like protein	KIAA0319L	>sp|Q8IZA0|K319L_HUMAN Dyslexia-associated protein KIAA0319-like protein OS=Homo sapiens GN=KIAA0319L PE=1 SV=2;>sp|Q8IZA0-2|K319L_HUMAN Isoform 2 of Dyslexia-associated protein KIAA0319-like protein OS=Homo sapiens GN=KIAA0319L;>tr|E7EN73|E7EN73_HUMAN Dys	11	8	8	8	8.2	8.2	8.2	115.66	1049	1049;996;1026;486;491;685;179;273;304;344;422	NaN	1.4767	1.5791	1.8089	NaN	1.8948	1.6241	1.7747	1.6986	1.2252	NaN	NaN	1.14	1.7808	1.5989	1.8939	NaN	1.6841	NaN	NaN	NaN	NaN	NaN	0.75239	NaN	NaN	NaN	NaN	NaN	NaN	NaN	NaN
Q15528;E9PGW7;Q5T8T7;E7EN96;Q5T8T8;Q15528-2	Q15528;E9PGW7;Q5T8T7;E7EN96;Q5T8T8;Q15528-2	3;3;3;3;3;3	3;3;3;3;3;3	3;3;3;3;3;3	Mediator of RNA polymerase II transcription subunit 22	MED22	>sp|Q15528|MED22_HUMAN Mediator of RNA polymerase II transcription subunit 22 OS=Homo sapiens GN=MED22 PE=1 SV=2;>tr|E9PGW7|E9PGW7_HUMAN Mediator of RNA polymerase II transcription subunit 22 (Fragment) OS=Homo sapiens GN=MED22 PE=2 SV=1;>tr|Q5T8T7|Q5T8T7_	6	3	3	3	21.5	21.5	21.5	22.22	200	200;111;134;135;137;140	NaN	NaN	NaN	NaN	NaN	NaN	NaN	NaN	NaN	NaN	NaN	NaN	NaN	NaN	NaN	NaN	NaN	NaN	NaN	NaN	NaN	1.9341	1.6478	NaN	0.84216	NaN	NaN	NaN	1.3641	1.7941	NaN	NaN
P28290;E7END2;P28290-2;E9PHV5;P28290-3;E7EUL7;H7BZ26;H7BZN0	P28290;E7END2;P28290-2;E9PHV5;P28290-3;E7EUL7	7;7;7;7;7;6;2;1	7;7;7;7;7;6;2;1	7;7;7;7;7;6;2;1	Sperm-specific antigen 2	SSFA2	>sp|P28290|SSFA2_HUMAN Sperm-specific antigen 2 OS=Homo sapiens GN=SSFA2 PE=1 SV=3;>tr|E7END2|E7END2_HUMAN Sperm-specific antigen 2 OS=Homo sapiens GN=SSFA2 PE=2 SV=1;>sp|P28290-2|SSFA2_HUMAN Isoform 2 of Sperm-specific antigen 2 OS=Homo sapiens GN=SSFA2;>	8	7	7	7	8.1	8.1	8.1	138.38	1259	1259;1084;1106;1237;1256;768;201;69	NaN	NaN	NaN	NaN	NaN	NaN	NaN	NaN	NaN	NaN	NaN	NaN	NaN	NaN	NaN	NaN	NaN	NaN	NaN	NaN	NaN	NaN	NaN	NaN	NaN	NaN	NaN	NaN	NaN	NaN	NaN	NaN
P55265;P55265-4;E7ENU4;P55265-5	P55265;P55265-4;E7ENU4;P55265-5	46;46;46;44	46;46;46;44	3;3;3;3	Double-stranded RNA-specific adenosine deaminase	ADAR	>sp|P55265|DSRAD_HUMAN Double-stranded RNA-specific adenosine deaminase OS=Homo sapiens GN=ADAR PE=1 SV=4;>sp|P55265-4|DSRAD_HUMAN Isoform 4 of Double-stranded RNA-specific adenosine deaminase OS=Homo sapiens GN=ADAR;>tr|E7ENU4|E7ENU4_HUMAN Double-stranded	4	46	46	3	45.3	45.3	3.3	136.06	1226	1226;1269;1269;931	0.93573	1.1106	1.2036	1.0856	1.1369	1.1895	1.1158	0.98243	1.1379	1.2146	1.1126	1.0377	1.0612	1.2956	1.2348	1.2746	1.0803	1.0668	1.0191	1.3319	1.166	1.1916	1.3172	1.2219	0.91645	1.2941	1.1697	1.3462	1.2537	1.2023	1.2903	1.3287
Q86YQ8;E7ENV7;Q86VY2;Q8IYJ1;Q9HCH3;Q8IYJ1-2	Q86YQ8;E7ENV7	12;12;5;2;2;1	11;11;4;1;1;1	11;11;4;1;1;1	Copine-8	CPNE8	>sp|Q86YQ8|CPNE8_HUMAN Copine-8 OS=Homo sapiens GN=CPNE8 PE=1 SV=2;>tr|E7ENV7|E7ENV7_HUMAN Copine-8 OS=Homo sapiens GN=CPNE8 PE=2 SV=2	6	12	11	11	28.4	26.8	26.8	63.107	564	564;552;233;553;593;503	NaN	NaN	NaN	NaN	NaN	NaN	NaN	NaN	NaN	NaN	NaN	NaN	NaN	NaN	NaN	NaN	NaN	NaN	0.90948	NaN	NaN	0.70797	NaN	NaN	0.7406	NaN	NaN	NaN	NaN	0.74273	0.7362	0.8081
Q03519;Q03519-2;E7EUZ6;E7ENX8;B0V2J7;F8VX49	Q03519;Q03519-2;E7EUZ6;E7ENX8;B0V2J7;F8VX49	5;5;5;5;4;4	5;5;5;5;4;4	5;5;5;5;4;4	Antigen peptide transporter 2	TAP2	>sp|Q03519|TAP2_HUMAN Antigen peptide transporter 2 OS=Homo sapiens GN=TAP2 PE=1 SV=1;>sp|Q03519-2|TAP2_HUMAN Isoform 2 of Antigen peptide transporter 2 OS=Homo sapiens GN=TAP2;>tr|E7EUZ6|E7EUZ6_HUMAN Antigen peptide transporter 2 OS=Homo sapiens GN=TAP2 P	6	5	5	5	12	12	12	75.663	686	686;653;769;843;653;769	NaN	NaN	NaN	NaN	NaN	NaN	1.0621	0.74748	0.94208	0.98984	0.88281	1.1403	0.74187	1.2517	NaN	0.8925	0.93579	0.87923	1.0008	1.1349	1.3473	NaN	0.98049	1.0378	0.78515	NaN	1.1368	1.1761	1.1183	1.1714	0.9081	1.2049
Q9NYB9;Q9NYB9-2;E7EW77;E7EP65;Q9NYB9-4;J3KNB2;E9PEZ7;Q9NYB9-3;E7EUA1;F8WAU3;F8WCD7;F8WAZ8;F8WBL5;F8WAQ3;F8WEB9;H7C3Q7;H0Y6B5	Q9NYB9;Q9NYB9-2;E7EW77;E7EP65;Q9NYB9-4;J3KNB2;E9PEZ7;Q9NYB9-3	9;9;9;9;9;9;8;5;2;2;2;2;2;2;2;2;2	5;5;5;5;5;5;4;3;2;2;2;2;2;2;2;2;1	5;5;5;5;5;5;4;3;2;2;2;2;2;2;2;2;1	Abl interactor 2	ABI2	>sp|Q9NYB9|ABI2_HUMAN Abl interactor 2 OS=Homo sapiens GN=ABI2 PE=1 SV=1;>sp|Q9NYB9-2|ABI2_HUMAN Isoform 2 of Abl interactor 2 OS=Homo sapiens GN=ABI2;>tr|E7EW77|E7EW77_HUMAN Abl interactor 2 OS=Homo sapiens GN=ABI2 PE=2 SV=1;>tr|E7EP65|E7EP65_HUMAN Abl in	17	9	5	5	20.3	13.5	13.5	55.663	513	513;475;480;486;507;513;458;401;44;53;59;75;87;97;108;201;293	NaN	NaN	NaN	NaN	NaN	NaN	NaN	NaN	NaN	NaN	NaN	NaN	0.99862	NaN	NaN	NaN	NaN	NaN	NaN	NaN	NaN	NaN	NaN	NaN	NaN	NaN	NaN	NaN	NaN	NaN	NaN	NaN
P50914;E7EPB3	P50914;E7EPB3	5;5	5;5	5;5	60S ribosomal protein L14	RPL14	>sp|P50914|RL14_HUMAN 60S ribosomal protein L14 OS=Homo sapiens GN=RPL14 PE=1 SV=4;>tr|E7EPB3|E7EPB3_HUMAN 60S ribosomal protein L14 OS=Homo sapiens GN=RPL14 PE=2 SV=1	2	5	5	5	24.7	24.7	24.7	23.432	215	215;124	1.1211	1.5642	1.0114	1.6155	1.9227	0.97658	1.6472	1.729	1.6653	1.8862	1.0956	1.555	1.4438	1.7796	1.0861	1.4648	1.0235	0.99389	0.91682	1.8344	1.962	1.8773	2.0286	1.5433	1.4236	1.4473	1.4142	1.8103	1.7116	1.8809	1.5565	2.1116
P16070;P16070-18;P16070-12;P16070-14;P16070-13;P16070-11;P16070-10;P16070-16;P16070-8;P16070-17;P16070-6;P16070-4;P16070-3;P16070-7;E7EPC6;P16070-5;H0YD13;H0Y2P0;H0YE40;H0YDW7;H0YCV9;P16070-15;H0Y5E4;P16070-9;H0YDX6;H0YD17;E9PKC6;Q86UZ1;P16070-19;H0YF08;H0YD90;H0YEV3;H0YEU1	P16070;P16070-18;P16070-12;P16070-14;P16070-13;P16070-11;P16070-10;P16070-16;P16070-8;P16070-17;P16070-6;P16070-4;P16070-3;P16070-7;E7EPC6;P16070-5;H0YD13;H0Y2P0;H0YE40	9;9;9;9;9;9;9;9;9;9;9;9;9;9;9;9;8;8;5;4;4;4;4;4;3;3;2;1;1;1;1;1;1	9;9;9;9;9;9;9;9;9;9;9;9;9;9;9;9;8;8;5;4;4;4;4;4;3;3;2;1;1;1;1;1;1	7;7;7;7;7;7;7;7;7;7;7;7;7;7;7;7;6;6;3;4;4;4;4;4;3;3;2;1;1;1;1;1;1	CD44 antigen	CD44	>sp|P16070|CD44_HUMAN CD44 antigen OS=Homo sapiens GN=CD44 PE=1 SV=3;>sp|P16070-18|CD44_HUMAN Isoform 18 of CD44 antigen OS=Homo sapiens GN=CD44;>sp|P16070-12|CD44_HUMAN Isoform 12 of CD44 antigen OS=Homo sapiens GN=CD44;>sp|P16070-14|CD44_HUMAN Isoform 14	33	9	9	7	13.9	13.9	12	81.537	742	742;340;361;396;425;429;493;668;674;691;699;699;711;713;714;734;185;287;82;240;249;294;294;675;181;230;78;80;139;187;195;243;249	0.96776	1.0248	1.0702	0.88785	1.0691	0.89329	0.88446	0.77459	1.1562	1.2071	1.0821	0.92154	1.06	0.9743	0.65556	0.99914	0.83304	1.1299	1.0911	0.95765	0.82438	0.9322	0.97487	0.75699	0.76526	0.91319	1.0787	1.0774	0.89724	0.96953	0.97607	1.0189
Q3KR37;Q3KR37-2;J3KNL5;E7EPH8;E9PRD6;Q3KR37-3	Q3KR37;Q3KR37-2;J3KNL5;E7EPH8;E9PRD6	6;6;6;6;5;2	6;6;6;6;5;2	5;5;5;5;4;2	GRAM domain-containing protein 1B	GRAMD1B	>sp|Q3KR37|GRM1B_HUMAN GRAM domain-containing protein 1B OS=Homo sapiens GN=GRAMD1B PE=1 SV=1;>sp|Q3KR37-2|GRM1B_HUMAN Isoform 2 of GRAM domain-containing protein 1B OS=Homo sapiens GN=GRAMD1B;>tr|J3KNL5|J3KNL5_HUMAN GRAM domain-containing protein 1B OS=Ho	6	6	6	5	8.7	8.7	7.5	85.399	738	738;698;738;745;441;425	NaN	NaN	NaN	NaN	NaN	NaN	NaN	NaN	NaN	NaN	NaN	NaN	NaN	NaN	NaN	NaN	NaN	NaN	NaN	NaN	NaN	NaN	NaN	NaN	NaN	NaN	NaN	NaN	NaN	NaN	NaN	NaN
Q6P996;E7EPL4;H3BNZ1;J3KNK7;H3BND4;E7EMH5;Q86XE2;Q6P996-2;Q6P474;H3BNL6;H3BU11;H3BQ54;H3BPV5;H3BM88	Q6P996;E7EPL4;H3BNZ1;J3KNK7;H3BND4;E7EMH5	22;22;22;21;21;19;10;9;6;4;2;2;1;1	22;22;22;21;21;19;10;9;6;4;2;2;1;1	22;22;22;21;21;19;10;9;6;4;2;2;1;1	Pyridoxal-dependent decarboxylase domain-containing protein 1	PDXDC1	>sp|Q6P996|PDXD1_HUMAN Pyridoxal-dependent decarboxylase domain-containing protein 1 OS=Homo sapiens GN=PDXDC1 PE=1 SV=2;>tr|E7EPL4|E7EPL4_HUMAN Pyridoxal-dependent decarboxylase domain-containing protein 1 OS=Homo sapiens GN=PDXDC1 PE=2 SV=1;>tr|H3BNZ1|H3	14	22	22	22	45.4	45.4	45.4	86.706	788	788;760;761;773;806;697;498;429;469;271;120;185;64;81	1.0141	1.0731	1.0558	0.94362	NaN	1.085	0.96028	NaN	0.9911	1.0881	0.95708	1.0907	1.179	1.1454	1.1787	0.90888	0.96485	1.1305	1.0493	1.2006	1.0902	0.88969	1.1363	1.6164	1.1145	1.1656	1.0045	1.1694	0.81111	1.137	1.0301	1.1821
P19404;E7EPT4	P19404;E7EPT4	8;8	8;8	8;8	NADH dehydrogenase [ubiquinone] flavoprotein 2, mitochondrial	NDUFV2	>sp|P19404|NDUV2_HUMAN NADH dehydrogenase [ubiquinone] flavoprotein 2, mitochondrial OS=Homo sapiens GN=NDUFV2 PE=1 SV=2;>tr|E7EPT4|E7EPT4_HUMAN NADH dehydrogenase [ubiquinone] flavoprotein 2, mitochondrial OS=Homo sapiens GN=NDUFV2 PE=2 SV=1	2	8	8	8	47	47	47	27.391	249	249;252	NaN	NaN	NaN	0.83541	NaN	NaN	1.3834	NaN	NaN	NaN	NaN	NaN	NaN	1.3233	NaN	0.84998	NaN	NaN	0.81613	0.98666	1.0481	0.78665	1.0879	NaN	0.74712	0.92607	1.0415	0.95332	0.8792	NaN	0.8541	NaN
Q14643;Q14643-4;Q14643-3;G5E9P1;Q14643-8;Q14643-7;Q14643-5;Q14643-6;Q14643-2;E7EVP7;E7EPX7;B7ZMI3	Q14643;Q14643-4;Q14643-3;G5E9P1;Q14643-8;Q14643-7;Q14643-5;Q14643-6;Q14643-2;E7EVP7;E7EPX7	48;48;48;48;48;48;48;48;48;48;48;13	48;48;48;48;48;48;48;48;48;48;48;13	41;41;41;41;41;41;41;41;41;41;41;10	Inositol 1,4,5-trisphosphate receptor type 1	ITPR1	>sp|Q14643|ITPR1_HUMAN Inositol 1,4,5-trisphosphate receptor type 1 OS=Homo sapiens GN=ITPR1 PE=1 SV=2;>sp|Q14643-4|ITPR1_HUMAN Isoform 4 of Inositol 1,4,5-trisphosphate receptor type 1 OS=Homo sapiens GN=ITPR1;>sp|Q14643-3|ITPR1_HUMAN Isoform 3 of Inosito	12	48	48	41	22.7	22.7	20.7	313.94	2758	2758;2695;2710;2710;2719;2728;2734;2743;2743;2743;2743;721	0.83126	1.2061	0.80461	1.1974	1.4496	0.93111	1.3178	0.90074	1.2442	1.5057	1.1812	1.3345	1.1891	1.3893	0.67009	1.3425	0.86524	0.97026	0.99104	1.1601	1.1579	1.0987	1.1885	1.0381	0.94329	1.0295	1.2619	1.1293	0.93341	1.2947	1.1613	1.2446
O14653;I3L1K7;I3L4Z6;O14653-3;I3L0K1;O14653-2;E7EQ34	O14653;I3L1K7;I3L4Z6;O14653-3;I3L0K1;O14653-2;E7EQ34	2;2;2;2;2;2;2	2;2;2;2;2;2;2	1;1;1;1;1;1;1	Golgi SNAP receptor complex member 2	GOSR2	>sp|O14653|GOSR2_HUMAN Golgi SNAP receptor complex member 2 OS=Homo sapiens GN=GOSR2 PE=1 SV=2;>tr|I3L1K7|I3L1K7_HUMAN Golgi SNAP receptor complex member 2 OS=Homo sapiens GN=GOSR2 PE=2 SV=1;>tr|I3L4Z6|I3L4Z6_HUMAN Golgi SNAP receptor complex member 2 OS=H	7	2	2	1	10.4	10.4	5.2	24.775	212	212;143;165;195;199;213;232	NaN	NaN	NaN	NaN	NaN	NaN	NaN	NaN	NaN	NaN	NaN	NaN	NaN	NaN	NaN	NaN	NaN	NaN	NaN	NaN	NaN	NaN	NaN	NaN	NaN	NaN	NaN	NaN	NaN	NaN	NaN	NaN
E7EQ69;Q9GZZ1;C9J5D1;Q9GZZ1-2;C9JZU6;C9J5J3;B0AZT5;F8WCK0	E7EQ69;Q9GZZ1;C9J5D1	13;12;8;6;5;4;4;3	13;12;8;6;5;4;4;3	13;12;8;6;5;4;4;3	N-alpha-acetyltransferase 50	NAA50	>tr|E7EQ69|E7EQ69_HUMAN N-alpha-acetyltransferase 50 OS=Homo sapiens GN=NAA50 PE=2 SV=1;>sp|Q9GZZ1|NAA50_HUMAN N-alpha-acetyltransferase 50 OS=Homo sapiens GN=NAA50 PE=1 SV=1;>tr|C9J5D1|C9J5D1_HUMAN N-alpha-acetyltransferase 50 OS=Homo sapiens GN=NAA50 PE=	8	13	13	13	60.1	60.1	60.1	19.311	168	168;169;129;81;57;58;95;48	1.0563	1.0323	1.1348	1.1733	1.0969	1.2799	1.1258	0.96871	1.252	1.027	1.0396	1.0034	1.1332	1.1577	1.1634	0.96971	1.0561	1.0764	0.99924	1.4692	1.1464	1.2769	1.2418	1.2796	0.99668	1.1028	1.2194	1.1223	1.2098	1.1422	1.0085	1.3089
Q14691;E7EQ95	Q14691;E7EQ95	3;3	3;3	3;3	DNA replication complex GINS protein PSF1	GINS1	>sp|Q14691|PSF1_HUMAN DNA replication complex GINS protein PSF1 OS=Homo sapiens GN=GINS1 PE=1 SV=1;>tr|E7EQ95|E7EQ95_HUMAN DNA replication complex GINS protein PSF1 OS=Homo sapiens GN=GINS1 PE=2 SV=1	2	3	3	3	17.3	17.3	17.3	22.988	196	196;165	NaN	NaN	NaN	NaN	NaN	NaN	NaN	NaN	NaN	NaN	NaN	NaN	NaN	NaN	NaN	NaN	NaN	NaN	NaN	NaN	NaN	NaN	NaN	NaN	NaN	NaN	NaN	NaN	NaN	NaN	NaN	NaN
P22570;J3QQX3;P22570-2;E7EQC1;P22570-3;B7Z7G2;B4DX24;B4DQQ4;G3V0F2;J3QKZ8;J3QQW7;J3KS64	P22570;J3QQX3;P22570-2;E7EQC1;P22570-3;B7Z7G2;B4DX24;B4DQQ4	14;14;14;14;14;13;13;12;5;4;3;1	14;14;14;14;14;13;13;12;5;4;3;1	14;14;14;14;14;13;13;12;5;4;3;1	NADPH:adrenodoxin oxidoreductase, mitochondrial	FDXR	>sp|P22570|ADRO_HUMAN NADPH:adrenodoxin oxidoreductase, mitochondrial OS=Homo sapiens GN=FDXR PE=1 SV=3;>tr|J3QQX3|J3QQX3_HUMAN NADPH:adrenodoxin oxidoreductase, mitochondrial OS=Homo sapiens GN=FDXR PE=3 SV=1;>sp|P22570-2|ADRO_HUMAN Isoform Long of NADPH:	12	14	14	14	38.5	38.5	38.5	53.836	491	491;463;497;522;534;439;483;451;381;164;178;91	NaN	NaN	NaN	NaN	NaN	NaN	NaN	NaN	0.55605	NaN	NaN	NaN	NaN	NaN	NaN	NaN	NaN	NaN	0.80399	NaN	0.71753	NaN	NaN	0.98271	NaN	0.9463	0.63305	NaN	0.88479	0.84239	0.85577	0.87694
Q8NBI5;E9PS74;E7EQD2;H0YD64	Q8NBI5;E9PS74;E7EQD2	5;5;5;2	5;5;5;2	5;5;5;2	Solute carrier family 43 member 3	SLC43A3	>sp|Q8NBI5|S43A3_HUMAN Solute carrier family 43 member 3 OS=Homo sapiens GN=SLC43A3 PE=1 SV=2;>tr|E9PS74|E9PS74_HUMAN Solute carrier family 43 member 3 (Fragment) OS=Homo sapiens GN=SLC43A3 PE=2 SV=1;>tr|E7EQD2|E7EQD2_HUMAN Solute carrier family 43 member	4	5	5	5	11.6	11.6	11.6	54.528	491	491;331;504;137	NaN	NaN	NaN	NaN	NaN	NaN	NaN	0.66318	NaN	NaN	NaN	NaN	NaN	NaN	NaN	NaN	NaN	NaN	0.88632	0.80646	0.77677	0.73235	NaN	NaN	0.66451	0.89732	1.0208	0.97916	0.84166	0.93144	NaN	NaN
P98171;F5GZW3;E7EQN5;P98171-2;C9JLA8;C9J5M2;H7C3G3;E9PCM6;H7C120;F8WAR0	P98171;F5GZW3;E7EQN5;P98171-2	5;5;5;5;2;2;2;2;1;1	5;5;5;5;2;2;2;2;1;1	5;5;5;5;2;2;2;2;1;1	Rho GTPase-activating protein 4	ARHGAP4	>sp|P98171|RHG04_HUMAN Rho GTPase-activating protein 4 OS=Homo sapiens GN=ARHGAP4 PE=1 SV=2;>tr|F5GZW3|F5GZW3_HUMAN Rho GTPase-activating protein 4 OS=Homo sapiens GN=ARHGAP4 PE=2 SV=1;>tr|E7EQN5|E7EQN5_HUMAN Rho GTPase-activating protein 4 OS=Homo sapiens	10	5	5	5	8.5	8.5	8.5	105.02	946	946;923;925;986;174;177;196;768;214;217	NaN	NaN	NaN	NaN	NaN	NaN	NaN	NaN	NaN	NaN	NaN	NaN	NaN	NaN	NaN	NaN	NaN	NaN	NaN	NaN	NaN	NaN	NaN	NaN	NaN	NaN	NaN	NaN	NaN	NaN	NaN	NaN
Q9UKV3;E7EQT4;Q9UKV3-5;Q9UKV3-3;Q9UKV3-2;G3V3B0;G3V3T3	Q9UKV3;E7EQT4;Q9UKV3-5;Q9UKV3-3;Q9UKV3-2	31;31;30;16;16;15;4	31;31;30;16;16;15;4	31;31;30;16;16;15;4	Apoptotic chromatin condensation inducer in the nucleus	ACIN1	>sp|Q9UKV3|ACINU_HUMAN Apoptotic chromatin condensation inducer in the nucleus OS=Homo sapiens GN=ACIN1 PE=1 SV=2;>tr|E7EQT4|E7EQT4_HUMAN Apoptotic chromatin condensation inducer in the nucleus OS=Homo sapiens GN=ACIN1 PE=2 SV=2;>sp|Q9UKV3-5|ACINU_HUMAN Is	7	31	31	31	30.1	30.1	30.1	151.86	1341	1341;1301;1328;583;614;582;194	0.9285	1.1766	0.95231	1.0766	1.118	1.1089	1.191	1.0262	1.0734	1.061	1.0846	1.1373	1.1277	1.2102	1.2151	1.0878	1.1249	1.1677	0.95567	1.2857	1.119	1.0154	1.1341	1.1605	0.92699	1.1864	1.1053	1.1251	1.2166	1.1056	1.0967	1.1742
O15347;E9PES6;E7ES08;E7EQU1;P0C6E5	O15347;E9PES6;E7ES08;E7EQU1	8;8;8;8;1	8;8;8;8;1	8;8;8;8;1	High mobility group protein B3	HMGB3	>sp|O15347|HMGB3_HUMAN High mobility group protein B3 OS=Homo sapiens GN=HMGB3 PE=1 SV=4;>tr|E9PES6|E9PES6_HUMAN High mobility group protein B3 (Fragment) OS=Homo sapiens GN=HMGB3 PE=2 SV=1;>tr|E7ES08|E7ES08_HUMAN High mobility group protein B3 (Fragment)	5	8	8	8	35	35	35	22.98	200	200;153;188;193;187	0.88676	1.1048	1.1352	1.2741	1.1457	1.5774	NaN	1.3934	1.2561	NaN	1.5236	1.1282	NaN	1.8937	1.4708	1.3995	1.3589	1.4962	1.0114	1.3819	1.2529	1.4824	1.1086	1.0486	1.2281	1.0451	1.6373	1.2612	1.1506	0.98749	NaN	1.2747
P61313;E7EQV9;E7ENU7;E7EX53;P61313-2;E7ERA2	P61313;E7EQV9;E7ENU7;E7EX53	10;10;9;5;4;1	10;10;9;5;4;1	10;10;9;5;4;1	60S ribosomal protein L15;Ribosomal protein L15	RPL15	>sp|P61313|RL15_HUMAN 60S ribosomal protein L15 OS=Homo sapiens GN=RPL15 PE=1 SV=2;>tr|E7EQV9|E7EQV9_HUMAN Ribosomal protein L15 (Fragment) OS=Homo sapiens GN=RPL15 PE=2 SV=1;>tr|E7ENU7|E7ENU7_HUMAN Ribosomal protein L15 (Fragment) OS=Homo sapiens GN=RPL15	6	10	10	10	38.7	38.7	38.7	24.146	204	204;174;175;133;145;59	0.85421	1.1351	1.1812	1.0399	1.1537	1.1235	1.0652	1.033	1.1165	1.0042	1.1818	1.0843	1.0383	1.1055	1.1031	1.0892	1.1088	1.0542	0.90274	1.1955	1.1276	1.0693	1.2657	1.2425	1.1417	1.2351	1.0807	1.0852	1.1099	1.0624	1.2816	1.2287
Q9BTC8;Q9BTC8-2;E7EQY4;E7EV10;E9PCS8;D6W5A2;E9PF88;H0YIT0	Q9BTC8;Q9BTC8-2;E7EQY4;E7EV10;E9PCS8;D6W5A2	13;13;13;13;11;11;2;1	8;8;8;8;6;6;2;1	6;6;6;6;4;5;1;0	Metastasis-associated protein MTA3	MTA3	>sp|Q9BTC8|MTA3_HUMAN Metastasis-associated protein MTA3 OS=Homo sapiens GN=MTA3 PE=1 SV=2;>sp|Q9BTC8-2|MTA3_HUMAN Isoform 2 of Metastasis-associated protein MTA3 OS=Homo sapiens GN=MTA3;>tr|E7EQY4|E7EQY4_HUMAN Metastasis-associated protein MTA3 OS=Homo sa	8	13	8	6	25.8	18.4	13.6	67.503	594	594;515;514;590;392;537;91;57	NaN	1.5534	2.0902	NaN	NaN	2.0436	1.4317	1.5022	1.273	1.3931	1.4233	1.2327	1.2905	1.3623	1.6784	0.61213	1.3737	NaN	1.3034	1.4582	1.1939	1.2142	1.5165	1.867	NaN	1.6856	NaN	1.4643	NaN	1.0828	NaN	NaN
Q16637;Q16637-3;E7EQZ4;Q16637-4;Q16637-2;B4DP61;H0YBZ9;I3L4C1	Q16637;Q16637-3;E7EQZ4;Q16637-4;Q16637-2;B4DP61	8;8;8;7;7;5;1;1	8;8;8;7;7;5;1;1	8;8;8;7;7;5;1;1	Survival motor neuron protein	SMN1	>sp|Q16637|SMN_HUMAN Survival motor neuron protein OS=Homo sapiens GN=SMN1 PE=1 SV=1;>sp|Q16637-3|SMN_HUMAN Isoform SMN-delta7 of Survival motor neuron protein OS=Homo sapiens GN=SMN1;>tr|E7EQZ4|E7EQZ4_HUMAN Survival motor neuron protein OS=Homo sapiens GN	8	8	8	8	34.4	34.4	34.4	31.848	294	294;282;294;250;262;227;79;143	NaN	1.434	0.96761	NaN	0.96356	NaN	NaN	NaN	NaN	NaN	NaN	0.89247	0.83263	NaN	1.0654	NaN	NaN	NaN	0.97488	0.97903	0.8823	1.2206	1.0595	0.92268	0.84517	0.88394	0.80416	1.1073	1.1239	0.96763	1.153	0.97742
Q658Y4;E7ER68;G3V120;H0YBR6	Q658Y4;E7ER68	10;10;3;1	10;10;3;1	10;10;3;1	Protein FAM91A1	FAM91A1	>sp|Q658Y4|F91A1_HUMAN Protein FAM91A1 OS=Homo sapiens GN=FAM91A1 PE=1 SV=3;>tr|E7ER68|E7ER68_HUMAN Protein FAM91A1 OS=Homo sapiens GN=FAM91A1 PE=2 SV=1	4	10	10	10	16.2	16.2	16.2	93.908	838	838;789;218;114	NaN	1.3824	NaN	NaN	NaN	1.1638	0.94813	NaN	NaN	NaN	NaN	1.042	NaN	NaN	1.2043	NaN	NaN	NaN	NaN	NaN	NaN	NaN	0.92233	NaN	0.85992	0.83658	NaN	NaN	NaN	1.0777	NaN	NaN
O95340;E7ER89;O95340-2	O95340;E7ER89;O95340-2	29;29;29	29;29;29	28;28;28	Bifunctional 3-phosphoadenosine 5-phosphosulfate synthase 2;Sulfate adenylyltransferase;Adenylyl-sulfate kinase	PAPSS2	>sp|O95340|PAPS2_HUMAN Bifunctional 3-phosphoadenosine 5-phosphosulfate synthase 2 OS=Homo sapiens GN=PAPSS2 PE=1 SV=2;>tr|E7ER89|E7ER89_HUMAN Sulfate adenylyltransferase OS=Homo sapiens GN=PAPSS2 PE=2 SV=2;>sp|O95340-2|PAPS2_HUMAN Isoform B of Bifunctio	3	29	29	28	54.4	54.4	52.1	69.5	614	614;618;619	0.96922	1.0442	1.144	1.0491	1.0961	1.1123	1.0505	0.94025	1.1181	1.0709	1.1116	1.0461	0.97819	1.0624	1.2313	0.98512	1.0614	1.0337	1.0694	1.225	1.1282	1.14	1.1727	1.1313	0.90569	1.1146	1.1615	1.1075	1.146	1.0109	1.1718	1.1157
Q9P203;E7ERI4;H0YJ41;Q9P203-5	Q9P203;E7ERI4;H0YJ41;Q9P203-5	1;1;1;1	1;1;1;1	1;1;1;1	BTB/POZ domain-containing protein 7	BTBD7	>sp|Q9P203|BTBD7_HUMAN BTB/POZ domain-containing protein 7 OS=Homo sapiens GN=BTBD7 PE=1 SV=3;>tr|E7ERI4|E7ERI4_HUMAN BTB/POZ domain-containing protein 7 OS=Homo sapiens GN=BTBD7 PE=2 SV=1;>tr|H0YJ41|H0YJ41_HUMAN BTB/POZ domain-containing protein 7 (Fragme	4	1	1	1	0.9	0.9	0.9	126.37	1132	1132;706;747;781	NaN	NaN	NaN	NaN	NaN	NaN	NaN	NaN	NaN	NaN	NaN	NaN	NaN	NaN	NaN	NaN	NaN	NaN	NaN	NaN	NaN	NaN	NaN	NaN	NaN	NaN	NaN	NaN	NaN	NaN	NaN	NaN
Q9UI10;E7ERK9;H7C2L8;F8W8L6	Q9UI10;E7ERK9	16;16;6;5	16;16;6;5	1;1;0;1	Translation initiation factor eIF-2B subunit delta	EIF2B4	>sp|Q9UI10|EI2BD_HUMAN Translation initiation factor eIF-2B subunit delta OS=Homo sapiens GN=EIF2B4 PE=1 SV=2;>tr|E7ERK9|E7ERK9_HUMAN Translation initiation factor eIF-2B subunit delta OS=Homo sapiens GN=EIF2B4 PE=2 SV=1	4	16	16	1	49.5	49.5	4	57.557	523	523;544;194;235	NaN	NaN	0.8261	1.0755	0.94497	NaN	NaN	1.2658	NaN	0.99167	NaN	1.4129	NaN	1.0391	0.99465	1.0343	NaN	0.98874	1.0464	1.0319	0.99261	1.0166	1.0335	0.96715	1.1509	1.1498	0.85875	0.73679	NaN	0.89554	0.94315	1.0874
Q86VM9;E7ERS3;Q86VM9-2;H3BRN6;H3BRH3;H3BPD0;H3BP01	Q86VM9;E7ERS3;Q86VM9-2	8;8;7;2;1;1;1	8;8;7;2;1;1;1	8;8;7;2;1;1;1	Zinc finger CCCH domain-containing protein 18	ZC3H18	>sp|Q86VM9|ZCH18_HUMAN Zinc finger CCCH domain-containing protein 18 OS=Homo sapiens GN=ZC3H18 PE=1 SV=2;>tr|E7ERS3|E7ERS3_HUMAN Zinc finger CCCH domain-containing protein 18 OS=Homo sapiens GN=ZC3H18 PE=2 SV=1;>sp|Q86VM9-2|ZCH18_HUMAN Isoform 2 of Zinc fi	7	8	8	8	14	14	14	106.38	953	953;977;757;75;196;197;238	NaN	1.3334	1.0499	0.97251	1.1672	NaN	1.1787	1.18	1.0003	1.0356	1.0001	1.2264	1.1345	1.1819	1.1823	1.2079	NaN	1.0172	0.99658	1.1167	NaN	1.0193	1.2207	1.0426	0.96371	1.0893	0.98263	0.98461	1.0346	0.9518	1.0704	1.0627
O95757;E7ES43;E9PDE8;D6RJ96	O95757;E7ES43;E9PDE8;D6RJ96	41;41;40;22	37;37;36;19	37;37;36;19	Heat shock 70 kDa protein 4L	HSPA4L	>sp|O95757|HS74L_HUMAN Heat shock 70 kDa protein 4L OS=Homo sapiens GN=HSPA4L PE=1 SV=3;>tr|E7ES43|E7ES43_HUMAN Heat shock 70 kDa protein 4L OS=Homo sapiens GN=HSPA4L PE=2 SV=2;>tr|E9PDE8|E9PDE8_HUMAN Heat shock 70 kDa protein 4L OS=Homo sapiens GN=HSPA4L	4	41	37	37	60.5	54.2	54.2	94.511	839	839;870;813;531	1.0269	1.1073	1.1345	1.0897	1.2589	1.2176	1.1384	1.0728	1.1273	1.1193	1.125	1.0926	1.1352	1.1768	1.2163	1.0598	1.0562	1.1183	1.0462	1.3265	1.1157	1.1206	1.3086	1.1884	0.97086	1.1429	1.1217	1.1249	1.1843	1.1485	1.1709	1.2785
Q05397;Q8IYN9;H0YBP1;Q05397-5;J3QT16;E7ESA6;Q05397-2;Q8N9D7;H0YB16;H0YBZ1;E9PEI4;Q05397-6;B4DWJ1;E5RHD8;Q05397-3;E5RI03;H0YB99;Q05397-4;E5RG86;H0YAS0;H0YB33;E5RJQ2;E5RG80;E5RGA6;E5RJI4	Q05397;Q8IYN9;H0YBP1;Q05397-5;J3QT16;E7ESA6;Q05397-2;Q8N9D7;H0YB16;H0YBZ1;E9PEI4;Q05397-6;B4DWJ1	12;12;12;12;12;12;10;10;10;10;9;6;6;4;3;2;2;2;1;1;1;1;1;1;1	12;12;12;12;12;12;10;10;10;10;9;6;6;4;3;2;2;2;1;1;1;1;1;1;1	12;12;12;12;12;12;10;10;10;10;9;6;6;4;3;2;2;2;1;1;1;1;1;1;1	Focal adhesion kinase 1	PTK2	>sp|Q05397|FAK1_HUMAN Focal adhesion kinase 1 OS=Homo sapiens GN=PTK2 PE=1 SV=2;>tr|Q8IYN9|Q8IYN9_HUMAN Focal adhesion kinase 1 OS=Homo sapiens GN=PTK2 PE=2 SV=1;>tr|H0YBP1|H0YBP1_HUMAN Focal adhesion kinase 1 (Fragment) OS=Homo sapiens GN=PTK2 PE=4 SV=1;>	25	12	12	12	15.7	15.7	15.7	119.23	1052	1052;1006;1017;1065;1065;1096;879;720;724;753;680;360;362;115;554;120;319;431;59;72;128;132;133;156;169	NaN	0.98623	NaN	NaN	NaN	1.1323	NaN	0.92962	NaN	0.91736	NaN	1.0902	NaN	NaN	NaN	NaN	0.87144	NaN	NaN	1.3715	NaN	0.98862	NaN	NaN	NaN	NaN	NaN	NaN	0.86381	NaN	NaN	NaN
F8VX32;E7ESB2;H0Y304;E7EQR9;P11532-5;P11532-6;P11532-9;B4DSV7;P11532-8;P11532-7	F8VX32;E7ESB2;H0Y304;E7EQR9;P11532-5;P11532-6;P11532-9;B4DSV7;P11532-8;P11532-7	14;14;14;13;12;12;11;11;11;11	1;1;1;1;1;1;1;1;0;0	1;1;1;1;1;1;1;1;0;0	Dystrophin	DMD	>tr|F8VX32|F8VX32_HUMAN Dystrophin OS=Homo sapiens GN=DMD PE=2 SV=1;>tr|E7ESB2|E7ESB2_HUMAN Dystrophin OS=Homo sapiens GN=DMD PE=2 SV=1;>tr|H0Y304|H0Y304_HUMAN Dystrophin (Fragment) OS=Homo sapiens GN=DMD PE=2 SV=1;>tr|E7EQR9|E7EQR9_HUMAN Dystrophin OS=Hom	10	14	1	1	15.8	1.3	1.3	141.77	1230	1230;1243;1386;1133;622;635;525;525;604;617	NaN	NaN	NaN	NaN	NaN	NaN	NaN	NaN	NaN	NaN	NaN	NaN	NaN	NaN	NaN	NaN	NaN	NaN	NaN	NaN	NaN	1.1487	NaN	NaN	NaN	NaN	NaN	NaN	NaN	NaN	NaN	1.2376
Q9Y4E1;Q9Y4E1-6;E7ESD2;Q9Y4E1-2;Q9Y4E1-4;Q641Q2-2;Q641Q2;Q5SNT6;Q9Y4E1-5;F8W7U3;J3KP36;Q9Y4E1-3;Q5T1D7;F5GY39;A6NLG0;B1AP61;Q5SRD0	Q9Y4E1;Q9Y4E1-6;E7ESD2;Q9Y4E1-2;Q9Y4E1-4;Q641Q2-2;Q641Q2;Q5SNT6;Q9Y4E1-5;F8W7U3;J3KP36;Q9Y4E1-3;Q5T1D7	9;9;9;9;9;9;9;8;8;8;8;8;5;3;2;2;1	9;9;9;9;9;9;9;8;8;8;8;8;5;3;2;2;1	9;9;9;9;9;9;9;8;8;8;8;8;5;3;2;2;1	WASH complex subunit FAM21C;WASH complex subunit FAM21A;WASH complex subunit FAM21B	FAM21C;FAM21A;FAM21B	>sp|Q9Y4E1|FA21C_HUMAN WASH complex subunit FAM21C OS=Homo sapiens GN=FAM21C PE=1 SV=3;>sp|Q9Y4E1-6|FA21C_HUMAN Isoform 6 of WASH complex subunit FAM21C OS=Homo sapiens GN=FAM21C;>tr|E7ESD2|E7ESD2_HUMAN WASH complex subunit FAM21A OS=Homo sapiens GN=FAM21A	17	9	9	9	10.5	10.5	10.5	144.67	1318	1318;1279;1279;1310;1320;1320;1341;1253;1245;1253;1262;1263;1067;510;132;156;308	NaN	NaN	1.2114	NaN	NaN	NaN	NaN	NaN	1.1451	NaN	NaN	1.2523	0.914	NaN	1.0814	NaN	0.85415	0.77943	NaN	1.6389	NaN	NaN	1.0212	NaN	NaN	NaN	NaN	1.0747	NaN	NaN	0.93055	NaN
Q9NWU5;E7ESL0;J3KQY1;Q9NWU5-2;Q9NWU5-3	Q9NWU5;E7ESL0;J3KQY1;Q9NWU5-2;Q9NWU5-3	5;5;5;4;4	5;5;5;4;4	5;5;5;4;4	39S ribosomal protein L22, mitochondrial	MRPL22	>sp|Q9NWU5|RM22_HUMAN 39S ribosomal protein L22, mitochondrial OS=Homo sapiens GN=MRPL22 PE=1 SV=1;>tr|E7ESL0|E7ESL0_HUMAN 39S ribosomal protein L22, mitochondrial OS=Homo sapiens GN=MRPL22 PE=2 SV=1;>tr|J3KQY1|J3KQY1_HUMAN 39S ribosomal protein L22, mitoc	5	5	5	5	29.1	29.1	29.1	23.64	206	206;212;232;120;126	NaN	NaN	NaN	NaN	NaN	NaN	NaN	NaN	NaN	NaN	NaN	NaN	NaN	NaN	NaN	NaN	NaN	NaN	NaN	NaN	NaN	NaN	NaN	NaN	NaN	NaN	NaN	NaN	NaN	NaN	NaN	NaN
Q71RG4;K7EKW3;E7ESS3;Q71RG4-2;Q71RG4-3	Q71RG4;K7EKW3;E7ESS3;Q71RG4-2;Q71RG4-3	2;2;2;2;1	2;2;2;2;1	2;2;2;2;1	Transmembrane and ubiquitin-like domain-containing protein 2	TMUB2	>sp|Q71RG4|TMUB2_HUMAN Transmembrane and ubiquitin-like domain-containing protein 2 OS=Homo sapiens GN=TMUB2 PE=2 SV=2;>tr|K7EKW3|K7EKW3_HUMAN Transmembrane and ubiquitin-like domain-containing protein 2 (Fragment) OS=Homo sapiens GN=TMUB2 PE=4 SV=1;>tr|E7	5	2	2	2	9.7	9.7	9.7	33.788	321	321;194;264;301;181	NaN	NaN	NaN	NaN	NaN	NaN	NaN	NaN	NaN	NaN	NaN	NaN	NaN	NaN	NaN	NaN	NaN	NaN	NaN	NaN	NaN	NaN	NaN	NaN	NaN	NaN	NaN	NaN	NaN	NaN	NaN	NaN
Q13330;Q13330-3;E7ESY4;Q13330-2;F8VSM3;H0Y4T7;F8W9Y9;H7C3F3;C9JJM0;H0YIV8	Q13330;Q13330-3;E7ESY4;Q13330-2;F8VSM3;H0Y4T7	13;13;13;10;8;7;3;1;1;1	8;8;8;5;4;5;3;1;1;1	8;8;8;5;4;5;3;1;1;1	Metastasis-associated protein MTA1	MTA1	>sp|Q13330|MTA1_HUMAN Metastasis-associated protein MTA1 OS=Homo sapiens GN=MTA1 PE=1 SV=2;>sp|Q13330-3|MTA1_HUMAN Isoform 3 of Metastasis-associated protein MTA1 OS=Homo sapiens GN=MTA1;>tr|E7ESY4|E7ESY4_HUMAN Metastasis-associated protein MTA1 OS=Homo sa	10	13	8	8	22	13.7	13.7	80.785	715	715;698;703;430;228;511;255;55;125;142	NaN	0.94097	0.66583	0.61239	1.1275	NaN	NaN	NaN	NaN	NaN	NaN	NaN	NaN	NaN	NaN	NaN	NaN	NaN	NaN	1.0503	NaN	NaN	NaN	NaN	NaN	1.4173	0.95935	1.0791	1.0778	NaN	NaN	NaN
O95299;E7ESZ7;Q8WXC9;Q8N1B9;C9J6X0;H7C2W5;H7C1Y7;H7C2X4	O95299;E7ESZ7;Q8WXC9	12;12;10;5;5;3;3;3	12;12;10;5;5;3;3;3	12;12;10;5;5;3;3;3	NADH dehydrogenase [ubiquinone] 1 alpha subcomplex subunit 10, mitochondrial	NDUFA10	>sp|O95299|NDUAA_HUMAN NADH dehydrogenase [ubiquinone] 1 alpha subcomplex subunit 10, mitochondrial OS=Homo sapiens GN=NDUFA10 PE=1 SV=1;>tr|E7ESZ7|E7ESZ7_HUMAN NADH dehydrogenase [ubiquinone] 1 alpha subcomplex subunit 10, mitochondrial OS=Homo sapiens GN	8	12	12	12	38.6	38.6	38.6	40.75	355	355;390;429;201;245;129;133;138	0.83947	1.0179	1.467	NaN	NaN	NaN	1.0269	0.71564	1.0101	0.99777	0.76496	0.80938	0.86674	NaN	0.74938	1.0112	0.9721	1.0452	1.0182	1.4681	1.1209	0.98711	1.0985	0.96187	0.82111	1.0948	0.9923	1.0909	1.0014	1.063	1.1494	1.0323
Q8NCG7;Q8NCG7-2;Q8NCG7-4;E7ET49;B4DVJ1;E7EVQ4	Q8NCG7;Q8NCG7-2;Q8NCG7-4;E7ET49	10;10;10;10;3;3	10;10;10;10;3;3	10;10;10;10;3;3	Sn1-specific diacylglycerol lipase beta	DAGLB	>sp|Q8NCG7|DGLB_HUMAN Sn1-specific diacylglycerol lipase beta OS=Homo sapiens GN=DAGLB PE=1 SV=2;>sp|Q8NCG7-2|DGLB_HUMAN Isoform 2 of Sn1-specific diacylglycerol lipase beta OS=Homo sapiens GN=DAGLB;>sp|Q8NCG7-4|DGLB_HUMAN Isoform 4 of Sn1-specific diacylg	6	10	10	10	18.2	18.2	18.2	73.731	672	672;391;543;631;220;379	NaN	0.73802	NaN	0.76362	NaN	NaN	0.72624	NaN	NaN	0.83842	0.87358	NaN	NaN	NaN	0.90051	NaN	NaN	NaN	NaN	NaN	NaN	NaN	NaN	0.94223	NaN	NaN	NaN	NaN	NaN	NaN	NaN	0.95953
Q15154;E7EV56;Q15154-2;E7ETA6;A6NNN6;H0YBA1;H0YAQ4;Q15154-3;E9PGW9;E7EV93	Q15154;E7EV56;Q15154-2;E7ETA6	11;11;11;11;3;3;2;1;1;1	11;11;11;11;3;3;2;1;1;1	11;11;11;11;3;3;2;1;1;1	Pericentriolar material 1 protein	PCM1	>sp|Q15154|PCM1_HUMAN Pericentriolar material 1 protein OS=Homo sapiens GN=PCM1 PE=1 SV=4;>tr|E7EV56|E7EV56_HUMAN Pericentriolar material 1 protein OS=Homo sapiens GN=PCM1 PE=2 SV=1;>sp|Q15154-2|PCM1_HUMAN Isoform 2 of Pericentriolar material 1 protein OS=	10	11	11	11	6.5	6.5	6.5	228.53	2024	2024;1860;1969;2016;723;764;115;530;530;749	NaN	NaN	NaN	NaN	NaN	NaN	NaN	NaN	NaN	NaN	NaN	NaN	NaN	NaN	NaN	NaN	NaN	NaN	NaN	NaN	NaN	NaN	NaN	NaN	NaN	NaN	NaN	NaN	NaN	NaN	NaN	NaN
Q9ULA0;E7ETB3;B9ZVU2;F8WAN0;E7EMB6;E7EPX3;C9JBE1;E5RJ35;C9JRG3;C9J1E2	Q9ULA0;E7ETB3;B9ZVU2;F8WAN0;E7EMB6;E7EPX3;C9JBE1	8;8;5;5;5;4;4;3;1;1	8;8;5;5;5;4;4;3;1;1	8;8;5;5;5;4;4;3;1;1	Aspartyl aminopeptidase	DNPEP	>sp|Q9ULA0|DNPEP_HUMAN Aspartyl aminopeptidase OS=Homo sapiens GN=DNPEP PE=1 SV=1;>tr|E7ETB3|E7ETB3_HUMAN Aspartyl aminopeptidase OS=Homo sapiens GN=DNPEP PE=2 SV=1;>tr|B9ZVU2|B9ZVU2_HUMAN Aspartyl aminopeptidase (Fragment) OS=Homo sapiens GN=DNPEP PE=2 SV	10	8	8	8	22.1	22.1	22.1	52.428	475	475;493;270;273;410;224;331;89;117;138	NaN	1.1334	NaN	NaN	NaN	NaN	NaN	NaN	NaN	NaN	NaN	NaN	1.7954	NaN	NaN	NaN	NaN	1.1297	NaN	1.2665	NaN	NaN	NaN	NaN	NaN	1.2193	NaN	NaN	NaN	1.34	1.4957	1.6819
Q12830;Q12830-4;Q12830-2;E7ETD6;F5GXF5;J3QQQ8;J3KSK9;E9PE19	Q12830;Q12830-4;Q12830-2;E7ETD6;F5GXF5	3;3;3;3;2;1;1;1	3;3;3;3;2;1;1;1	3;3;3;3;2;1;1;1	Nucleosome-remodeling factor subunit BPTF	BPTF	>sp|Q12830|BPTF_HUMAN Nucleosome-remodeling factor subunit BPTF OS=Homo sapiens GN=BPTF PE=1 SV=3;>sp|Q12830-4|BPTF_HUMAN Isoform 4 of Nucleosome-remodeling factor subunit BPTF OS=Homo sapiens GN=BPTF;>sp|Q12830-2|BPTF_HUMAN Isoform 2 of Nucleosome-remodel	8	3	3	3	1.5	1.5	1.5	338.26	3046	3046;2903;2920;2764;2457;420;484;650	NaN	NaN	0.95413	NaN	NaN	NaN	NaN	NaN	NaN	NaN	NaN	NaN	NaN	NaN	NaN	NaN	NaN	NaN	0.90741	NaN	NaN	1.2639	1.3885	1.1772	NaN	NaN	0.93092	1.1502	1.173	NaN	1.2181	1.3366
P62847;P62847-2;E7ETK0;P62847-3;P62847-4	P62847;P62847-2;E7ETK0;P62847-3;P62847-4	6;6;6;6;6	6;6;6;6;6	6;6;6;6;6	40S ribosomal protein S24	RPS24	>sp|P62847|RS24_HUMAN 40S ribosomal protein S24 OS=Homo sapiens GN=RPS24 PE=1 SV=1;>sp|P62847-2|RS24_HUMAN Isoform 2 of 40S ribosomal protein S24 OS=Homo sapiens GN=RPS24;>tr|E7ETK0|E7ETK0_HUMAN 40S ribosomal protein S24 OS=Homo sapiens GN=RPS24 PE=2 SV=1;	5	6	6	6	36.1	36.1	36.1	15.423	133	133;130;131;132;289	0.9396	1.1464	1.1452	1.1196	1.3656	1.2486	1.1507	1.2855	1.2556	1.2366	1.1979	1.355	1.1162	1.3828	1.2556	1.1675	1.1372	1.1888	0.9617	1.2931	1.2389	1.2361	1.2672	1.2532	0.95869	1.205	1.1911	1.2141	1.2767	1.1902	1.2407	1.3219
Q07864;F5H1D6;E7ETS8;F5H7H6;F5H5Q5;B3KS74;F5H7E4	Q07864;F5H1D6;E7ETS8;F5H7H6	11;11;11;6;3;2;1	11;11;11;6;3;2;1	11;11;11;6;3;2;1	DNA polymerase epsilon catalytic subunit A;DNA polymerase	POLE	>sp|Q07864|DPOE1_HUMAN DNA polymerase epsilon catalytic subunit A OS=Homo sapiens GN=POLE PE=1 SV=5;>tr|F5H1D6|F5H1D6_HUMAN DNA polymerase OS=Homo sapiens GN=POLE PE=2 SV=1;>tr|E7ETS8|E7ETS8_HUMAN DNA polymerase OS=Homo sapiens GN=POLE PE=2 SV=2;>tr|F5H7H6	7	11	11	11	5.6	5.6	5.6	261.51	2286	2286;2259;2297;1164;180;496;310	NaN	NaN	NaN	NaN	NaN	NaN	NaN	NaN	NaN	NaN	NaN	NaN	NaN	NaN	NaN	NaN	NaN	NaN	NaN	NaN	NaN	NaN	NaN	NaN	NaN	NaN	NaN	NaN	NaN	NaN	NaN	NaN
P09001;H0Y9G6;E7ETU7;E9PF06;D6RC14;D6RBQ5	P09001;H0Y9G6;E7ETU7;E9PF06	8;8;8;6;3;1	8;8;8;6;3;1	8;8;8;6;3;1	39S ribosomal protein L3, mitochondrial	MRPL3	>sp|P09001|RM03_HUMAN 39S ribosomal protein L3, mitochondrial OS=Homo sapiens GN=MRPL3 PE=1 SV=1;>tr|H0Y9G6|H0Y9G6_HUMAN 39S ribosomal protein L3, mitochondrial (Fragment) OS=Homo sapiens GN=MRPL3 PE=3 SV=1;>tr|E7ETU7|E7ETU7_HUMAN 39S ribosomal protein L3,	6	8	8	8	35.6	35.6	35.6	38.632	348	348;363;375;176;155;28	NaN	0.83904	1.7151	0.9637	1.2366	0.81414	1.0831	0.92931	0.90293	1.0684	0.91723	1.0016	1.1076	1.2318	0.68128	1.1969	1.0278	1.1716	NaN	NaN	1.5706	NaN	NaN	NaN	1.0948	NaN	1.2339	NaN	1.2646	0.93382	NaN	NaN
Q7KZI7;Q7KZI7-4;Q7KZI7-10;Q7KZI7-13;Q7KZI7-7;E7ETY4;Q7KZI7-2;Q7KZI7-15;Q7KZI7-5;Q7KZI7-16;Q7KZI7-9;Q7KZI7-12;Q7KZI7-14;Q7KZI7-3;Q7KZI7-6;Q7KZI7-11;Q7KZI7-8;E9PC69;F5H6N2;F5H4F6;P27448;Q9P0L2;P27448-3;P27448-6;H0YKP9;A2SY06;H0YIY6;Q9P0L2-2;P27448-8;P27448-4;P27448-2;Q9P0L2-3;P27448-7;J3KNR0	Q7KZI7;Q7KZI7-4;Q7KZI7-10;Q7KZI7-13;Q7KZI7-7;E7ETY4;Q7KZI7-2;Q7KZI7-15;Q7KZI7-5;Q7KZI7-16;Q7KZI7-9;Q7KZI7-12;Q7KZI7-14;Q7KZI7-3;Q7KZI7-6;Q7KZI7-11;Q7KZI7-8;E9PC69	5;5;5;5;5;5;5;5;5;5;5;5;5;5;5;5;5;5;2;2;1;1;1;1;1;1;1;1;1;1;1;1;1;1	5;5;5;5;5;5;5;5;5;5;5;5;5;5;5;5;5;5;2;2;1;1;1;1;1;1;1;1;1;1;1;1;1;1	5;5;5;5;5;5;5;5;5;5;5;5;5;5;5;5;5;5;2;2;1;1;1;1;1;1;1;1;1;1;1;1;1;1	Serine/threonine-protein kinase MARK2	MARK2	>sp|Q7KZI7|MARK2_HUMAN Serine/threonine-protein kinase MARK2 OS=Homo sapiens GN=MARK2 PE=1 SV=2;>sp|Q7KZI7-4|MARK2_HUMAN Isoform 4 of Serine/threonine-protein kinase MARK2 OS=Homo sapiens GN=MARK2;>sp|Q7KZI7-10|MARK2_HUMAN Isoform 10 of Serine/threonine-pr	34	5	5	5	7.5	7.5	7.5	87.91	788	788;725;686;691;692;699;701;709;719;724;734;740;745;746;755;773;779;780;112;161;753;795;729;713;222;331;505;645;659;744;752;758;760;776	NaN	NaN	NaN	NaN	NaN	NaN	NaN	NaN	NaN	NaN	NaN	NaN	NaN	NaN	NaN	NaN	NaN	NaN	NaN	NaN	NaN	NaN	NaN	NaN	NaN	NaN	NaN	NaN	NaN	NaN	NaN	NaN
Q9Y6E2;E7ETZ4;B5MCH7;B5MCE7;Q75MG1;E7EMS9;C9JF98;E9PFD4;F8WDX8	Q9Y6E2;E7ETZ4;B5MCH7;B5MCE7;Q75MG1	23;23;20;15;15;9;7;5;5	23;23;20;15;15;9;7;5;5	21;21;18;14;14;8;6;5;5	Basic leucine zipper and W2 domain-containing protein 2	BZW2	>sp|Q9Y6E2|BZW2_HUMAN Basic leucine zipper and W2 domain-containing protein 2 OS=Homo sapiens GN=BZW2 PE=1 SV=1;>tr|E7ETZ4|E7ETZ4_HUMAN Basic leucine zipper and W2 domain-containing protein 2 (Fragment) OS=Homo sapiens GN=BZW2 PE=2 SV=1;>tr|B5MCH7|B5MCH7_H	9	23	23	21	43.2	43.2	39.9	48.162	419	419;408;343;225;274;208;163;161;170	1.0222	1.0194	1.0585	1.1377	1.1419	1.0879	0.98328	1.0904	1.1624	1.0108	1.0814	1.2147	1.1341	1.1755	1.2543	1.0277	1.0901	1.1078	0.94112	1.258	1.1846	1.0888	1.1149	1.0999	0.91351	1.1477	1.0676	1.1325	1.2548	1.2044	1.1688	1.1307
P50395;E7EU23;P50395-2;Q5SX87;Q5SX86;Q5SX90	P50395;E7EU23;P50395-2	31;31;28;14;9;8	31;31;28;14;9;8	18;18;17;7;5;4	Rab GDP dissociation inhibitor beta	GDI2	>sp|P50395|GDIB_HUMAN Rab GDP dissociation inhibitor beta OS=Homo sapiens GN=GDI2 PE=1 SV=2;>tr|E7EU23|E7EU23_HUMAN Rab GDP dissociation inhibitor beta OS=Homo sapiens GN=GDI2 PE=2 SV=1;>sp|P50395-2|GDIB_HUMAN Isoform 2 of Rab GDP dissociation inhibitor be	6	31	31	18	73.3	73.3	38.4	50.663	445	445;449;400;263;155;148	0.94112	1.1016	1.1171	1.068	1.138	1.1709	1.0784	1.0832	1.1205	1.0777	1.1113	1.0878	1.0972	1.119	1.2348	1.0678	1.0755	1.1224	0.99917	1.2646	1.1672	1.059	1.1983	1.1492	0.9394	1.149	1.0913	1.1653	1.1471	1.141	1.1754	1.1766
P68400;E7EU96;P68400-2	P68400;E7EU96;P68400-2	16;16;9	16;16;9	16;16;9	Casein kinase II subunit alpha	CSNK2A1	>sp|P68400|CSK21_HUMAN Casein kinase II subunit alpha OS=Homo sapiens GN=CSNK2A1 PE=1 SV=1;>tr|E7EU96|E7EU96_HUMAN Casein kinase II subunit alpha OS=Homo sapiens GN=CSNK2A1 PE=2 SV=1;>sp|P68400-2|CSK21_HUMAN Isoform 2 of Casein kinase II subunit alpha OS=H	3	16	16	16	51.7	51.7	51.7	45.143	391	391;385;255	0.90459	1.243	1.1159	1.1615	1.1601	1.0646	1.0967	1.0664	1.1657	1.108	1.1309	1.2336	1.3362	1.3401	1.2757	1.0564	1.1015	1.1308	0.96712	1.2152	1.2747	1.0894	1.3127	1.2348	0.90555	1.1676	1.1804	1.2723	1.1692	1.1751	1.2052	1.3153
P28288;E7EUE1;F5GYC1;P28288-2;P28288-3	P28288;E7EUE1;F5GYC1;P28288-2	20;20;19;15;2	20;20;19;15;2	20;20;19;15;2	ATP-binding cassette sub-family D member 3	ABCD3	>sp|P28288|ABCD3_HUMAN ATP-binding cassette sub-family D member 3 OS=Homo sapiens GN=ABCD3 PE=1 SV=1;>tr|E7EUE1|E7EUE1_HUMAN ATP-binding cassette sub-family D member 3 OS=Homo sapiens GN=ABCD3 PE=2 SV=1;>tr|F5GYC1|F5GYC1_HUMAN ATP-binding cassette sub-fami	5	20	20	20	35.1	35.1	35.1	75.475	659	659;683;586;549;236	0.95917	1.0464	1.1443	1.0936	1.0702	0.96649	1.0371	0.93734	1.1699	1.1021	0.93567	0.92918	0.99295	0.94624	0.9687	0.87864	1.0022	0.87012	0.96258	1.2529	0.95328	0.93971	1.0916	0.95837	0.79963	1.1211	1.0084	1.0937	1.1897	1.0225	1.0114	0.97621
P05091;F8W0A9;F8VXI5;E7EUE5	P05091;F8W0A9;F8VXI5;E7EUE5	2;2;2;2	1;1;1;1	1;1;1;1	Aldehyde dehydrogenase, mitochondrial	ALDH2	>sp|P05091|ALDH2_HUMAN Aldehyde dehydrogenase, mitochondrial OS=Homo sapiens GN=ALDH2 PE=1 SV=2;>tr|F8W0A9|F8W0A9_HUMAN Aldehyde dehydrogenase, mitochondrial OS=Homo sapiens GN=ALDH2 PE=2 SV=1;>tr|F8VXI5|F8VXI5_HUMAN Aldehyde dehydrogenase, mitochondrial O	4	2	1	1	4.1	2.3	2.3	56.381	517	517;377;441;470	NaN	NaN	NaN	NaN	NaN	NaN	NaN	NaN	NaN	NaN	NaN	NaN	NaN	NaN	NaN	NaN	NaN	NaN	NaN	NaN	NaN	NaN	NaN	NaN	NaN	NaN	NaN	NaN	NaN	NaN	NaN	NaN
E7EUI8;E7EM57	E7EUI8;E7EM57	25;23	1;1	1;1	Glucose-6-phosphate 1-dehydrogenase	G6PD	>tr|E7EUI8|E7EUI8_HUMAN Glucose-6-phosphate 1-dehydrogenase (Fragment) OS=Homo sapiens GN=G6PD PE=2 SV=1;>tr|E7EM57|E7EM57_HUMAN Glucose-6-phosphate 1-dehydrogenase (Fragment) OS=Homo sapiens GN=G6PD PE=2 SV=1	2	25	1	1	74.3	3.2	3.2	38.521	339	339;320	NaN	NaN	NaN	NaN	NaN	NaN	NaN	NaN	NaN	NaN	NaN	NaN	NaN	NaN	NaN	NaN	NaN	NaN	NaN	NaN	NaN	NaN	NaN	NaN	NaN	NaN	NaN	NaN	NaN	NaN	NaN	NaN
E7EUT4	E7EUT4	24	1	1	Glyceraldehyde-3-phosphate dehydrogenase	GAPDH	>tr|E7EUT4|E7EUT4_HUMAN Glyceraldehyde-3-phosphate dehydrogenase OS=Homo sapiens GN=GAPDH PE=2 SV=1	1	24	1	1	85	4.1	4.1	31.548	293	293	NaN	NaN	NaN	NaN	NaN	NaN	NaN	NaN	NaN	NaN	NaN	NaN	NaN	NaN	NaN	NaN	NaN	NaN	NaN	NaN	NaN	NaN	NaN	NaN	NaN	NaN	NaN	NaN	NaN	NaN	NaN	NaN
O75179;G5E964;H0YM23;E7EUV3;O75179-2;O75179-4;O75179-3;O75179-5;H0YMS3;H0YLQ3;H3BLS9	O75179;G5E964;H0YM23;E7EUV3;O75179-2;O75179-4;O75179-3	22;22;22;22;22;13;12;10;8;8;5	22;22;22;22;22;13;12;10;8;8;5	12;12;12;12;12;8;6;5;4;3;0	Ankyrin repeat domain-containing protein 17	ANKRD17	>sp|O75179|ANR17_HUMAN Ankyrin repeat domain-containing protein 17 OS=Homo sapiens GN=ANKRD17 PE=1 SV=3;>tr|G5E964|G5E964_HUMAN Ankyrin repeat domain 17, isoform CRA_b OS=Homo sapiens GN=ANKRD17 PE=4 SV=1;>tr|H0YM23|H0YM23_HUMAN Ankyrin repeat domain-conta	11	22	22	12	10.9	10.9	6.1	274.25	2603	2603;2352;2487;2490;2602;2010;1187;751;828;862;687	0.77897	1.1703	0.91208	1.2974	NaN	1.0323	0.89874	0.93243	0.92469	1.5	1.0818	0.99561	NaN	NaN	1.2986	1.0668	NaN	0.78497	1.0331	1.2743	NaN	1.8177	1.1196	0.97184	0.86316	1.0236	0.81816	0.99807	1.0202	1.3998	0.90784	1.0415
E7EV46;Q03468;D6R9X7;Q8N328	E7EV46;Q03468;D6R9X7	6;4;3;2	6;4;3;2	6;4;3;2	DNA excision repair protein ERCC-6	PGBD3;ERCC6	>tr|E7EV46|E7EV46_HUMAN PiggyBac transposable element-derived protein 3 OS=Homo sapiens GN=PGBD3 PE=4 SV=1;>sp|Q03468|ERCC6_HUMAN DNA excision repair protein ERCC-6 OS=Homo sapiens GN=ERCC6 PE=1 SV=1;>tr|D6R9X7|D6R9X7_HUMAN DNA excision repair protein ERCC	4	6	6	6	8	8	8	119.49	1061	1061;1493;179;593	NaN	NaN	NaN	NaN	NaN	NaN	NaN	NaN	NaN	NaN	NaN	NaN	NaN	NaN	NaN	NaN	NaN	NaN	NaN	NaN	NaN	NaN	NaN	NaN	NaN	NaN	NaN	NaN	NaN	NaN	NaN	NaN
E7EVA0;P27816;P27816-6;B9ZVR1;P27816-4;E9PGM5;B5MEG9	E7EVA0;P27816;P27816-6;B9ZVR1	46;39;38;24;16;16;13	46;39;38;24;16;16;13	10;4;4;0;2;2;2	Microtubule-associated protein;Microtubule-associated protein 4	MAP4	>tr|E7EVA0|E7EVA0_HUMAN Microtubule-associated protein OS=Homo sapiens GN=MAP4 PE=2 SV=1;>sp|P27816|MAP4_HUMAN Microtubule-associated protein 4 OS=Homo sapiens GN=MAP4 PE=1 SV=3;>sp|P27816-6|MAP4_HUMAN Isoform 6 of Microtubule-associated protein 4 OS=Homo	7	46	46	10	28.2	28.2	6.6	245.44	2297	2297;1152;1135;811;872;887;712	0.89454	1.016	0.90025	0.92191	0.96274	1.124	1.023	1.0484	0.94902	1.1466	0.98104	1.0295	1.0788	1.1775	1.1395	1.0143	1.0646	1.0394	0.95106	1.3496	1.3845	1.2184	1.2853	1.2728	1.0039	1.2866	1.3111	1.2852	1.4326	1.3071	1.3199	1.6343
Q14676;Q14676-3;F8VV34;E7EVA7;Q14676-2;E9PGY5;Q14676-4;F8W1C2;F8VZP8;F8VU38;A2AB05;E7ENQ0;A1Z5I7;A2AB06;A2AB07;F8WCC2;E7ER07	Q14676;Q14676-3;F8VV34;E7EVA7;Q14676-2;E9PGY5;Q14676-4;F8W1C2;F8VZP8;F8VU38	17;17;17;17;17;17;15;14;14;14;5;5;5;2;2;2;2	17;17;17;17;17;17;15;14;14;14;5;5;5;2;2;2;2	17;17;17;17;17;17;15;14;14;14;5;5;5;2;2;2;2	Mediator of DNA damage checkpoint protein 1	MDC1	>sp|Q14676|MDC1_HUMAN Mediator of DNA damage checkpoint protein 1 OS=Homo sapiens GN=MDC1 PE=1 SV=3;>sp|Q14676-3|MDC1_HUMAN Isoform 3 of Mediator of DNA damage checkpoint protein 1 OS=Homo sapiens GN=MDC1;>tr|F8VV34|F8VV34_HUMAN Mediator of DNA damage chec	17	17	17	17	14.1	14.1	14.1	226.66	2089	2089;1802;1802;1802;1825;1825;1066;1655;1655;1655;162;244;245;113;127;221;221	0.91073	1.1159	0.7809	0.84374	0.91629	NaN	NaN	0.49622	0.082019	NaN	NaN	0.05947	0.7362	0.0074687	0.0070556	NaN	NaN	0.05418	0.96117	1.0604	0.94461	1.247	1.0474	1.1185	0.87959	0.92798	0.76284	0.74383	0.95988	0.63471	0.63796	0.57964
Q676U5;Q676U5-2;E7EVC7;Q676U5-5;Q676U5-3;Q676U5-4;C9JAY7;C9JK97;C9J1B2	Q676U5;Q676U5-2;E7EVC7;Q676U5-5;Q676U5-3	6;6;6;5;5;2;1;1;1	6;6;6;5;5;2;1;1;1	6;6;6;5;5;2;1;1;1	Autophagy-related protein 16-1	ATG16L1	>sp|Q676U5|A16L1_HUMAN Autophagy-related protein 16-1 OS=Homo sapiens GN=ATG16L1 PE=1 SV=2;>sp|Q676U5-2|A16L1_HUMAN Isoform 2 of Autophagy-related protein 16-1 OS=Homo sapiens GN=ATG16L1;>tr|E7EVC7|E7EVC7_HUMAN Autophagy-related protein 16-1 OS=Homo sapien	9	6	6	6	16	16	16	68.264	607	607;588;624;444;470;428;164;178;187	NaN	NaN	NaN	NaN	NaN	NaN	NaN	NaN	NaN	NaN	NaN	NaN	NaN	NaN	NaN	NaN	NaN	NaN	1.1329	NaN	NaN	0.80023	0.95509	NaN	NaN	NaN	NaN	NaN	NaN	1.0914	NaN	NaN
E7EVJ5;Q96F07-2;E7EVF4;Q96F07;F5H583;E7EWA4;E7EW33;H7C229;E5RJW3;H0YNP0;E5RFQ0	E7EVJ5;Q96F07-2;E7EVF4;Q96F07;F5H583;E7EWA4;E7EW33;H7C229	19;19;19;17;17;17;15;11;1;1;1	3;3;3;3;3;3;2;2;0;0;0	3;3;3;3;3;3;2;2;0;0;0	Cytoplasmic FMR1-interacting protein 2	CYFIP2	>tr|E7EVJ5|E7EVJ5_HUMAN Cytoplasmic FMR1-interacting protein 2 OS=Homo sapiens GN=CYFIP2 PE=2 SV=1;>sp|Q96F07-2|CYFP2_HUMAN Isoform 2 of Cytoplasmic FMR1-interacting protein 2 OS=Homo sapiens GN=CYFIP2;>tr|E7EVF4|E7EVF4_HUMAN Cytoplasmic FMR1-interacting p	11	19	3	3	17.1	3.2	3.2	142.58	1227	1227;1253;1253;1278;1178;1278;1057;952;71;77;95	NaN	NaN	NaN	NaN	NaN	NaN	NaN	NaN	NaN	NaN	NaN	NaN	NaN	NaN	NaN	NaN	NaN	NaN	NaN	NaN	NaN	NaN	NaN	NaN	NaN	NaN	NaN	NaN	NaN	NaN	NaN	NaN
E7EVH7;Q07866;Q07866-4;Q07866-8;G3V2E7;Q07866-2;Q07866-3;F8W6L3;Q07866-7;G3V3H3;Q07866-5;F8VTM4;Q07866-6;G3V5R9;Q07866-9;G5E9S8;G3V2P7;H0YG16;H0YJU9;H0YJL0;H0YJT3;H0YGB8;Q96IL0;H7BZ67	E7EVH7;Q07866;Q07866-4;Q07866-8;G3V2E7;Q07866-2;Q07866-3;F8W6L3;Q07866-7;G3V3H3;Q07866-5;F8VTM4;Q07866-6;G3V5R9;Q07866-9;G5E9S8	22;21;21;21;21;21;21;21;21;21;21;21;21;21;21;20;6;6;5;5;5;2;1;1	15;14;14;14;14;14;14;14;14;14;14;14;14;14;14;14;6;6;5;5;5;2;1;1	13;12;12;12;12;12;12;12;12;12;12;12;12;12;12;12;6;5;4;4;4;2;1;1	Kinesin light chain 1	KLC1	>tr|E7EVH7|E7EVH7_HUMAN Kinesin light chain 1 OS=Homo sapiens GN=KLC1 PE=2 SV=1;>sp|Q07866|KLC1_HUMAN Kinesin light chain 1 OS=Homo sapiens GN=KLC1 PE=1 SV=2;>sp|Q07866-4|KLC1_HUMAN Isoform J of Kinesin light chain 1 OS=Homo sapiens GN=KLC1;>sp|Q07866-8|KL	24	22	15	13	38.3	26.1	23.2	83.694	732	732;573;637;551;551;560;564;576;584;609;616;618;628;630;639;549;150;268;131;150;161;60;206;118	0.9395	0.89463	0.95343	0.9809	NaN	1.125	0.91638	1.2212	1.0753	0.99791	1.0585	1.2439	1.1566	1.0968	1.2457	0.90698	1.0666	0.99747	NaN	NaN	NaN	NaN	NaN	0.66837	NaN	1.0655	NaN	NaN	NaN	NaN	NaN	0.93174
Q9H490;Q9H490-2;E7EVL4	Q9H490;Q9H490-2;E7EVL4	1;1;1	1;1;1	1;1;1	Phosphatidylinositol glycan anchor biosynthesis class U protein	PIGU	>sp|Q9H490|PIGU_HUMAN Phosphatidylinositol glycan anchor biosynthesis class U protein OS=Homo sapiens GN=PIGU PE=1 SV=3;>sp|Q9H490-2|PIGU_HUMAN Isoform 2 of Phosphatidylinositol glycan anchor biosynthesis class U protein OS=Homo sapiens GN=PIGU;>tr|E7EVL4|	3	1	1	1	2.5	2.5	2.5	50.051	435	435;415;423	NaN	NaN	NaN	NaN	NaN	NaN	NaN	NaN	NaN	NaN	NaN	NaN	NaN	NaN	NaN	NaN	NaN	NaN	NaN	NaN	NaN	NaN	NaN	NaN	NaN	NaN	NaN	NaN	NaN	NaN	NaN	NaN
Q8WWY3;E7EVX8;E7ESA8;Q8WWY3-3;Q8WWY3-2;E7EU94;E7ESX0;E7EN72	Q8WWY3;E7EVX8;E7ESA8;Q8WWY3-3;Q8WWY3-2;E7EU94;E7ESX0;E7EN72	15;15;12;10;10;8;8;8	15;15;12;10;10;8;8;8	15;15;12;10;10;8;8;8	U4/U6 small nuclear ribonucleoprotein Prp31	PRPF31	>sp|Q8WWY3|PRP31_HUMAN U4/U6 small nuclear ribonucleoprotein Prp31 OS=Homo sapiens GN=PRPF31 PE=1 SV=2;>tr|E7EVX8|E7EVX8_HUMAN U4/U6 small nuclear ribonucleoprotein Prp31 OS=Homo sapiens GN=PRPF31 PE=2 SV=1;>tr|E7ESA8|E7ESA8_HUMAN U4/U6 small nuclear ribon	8	15	15	15	44.1	44.1	44.1	55.455	499	499;493;450;278;364;261;276;284	0.95466	1.028	NaN	0.99582	0.91704	NaN	1.0604	1.5697	1.107	0.74584	1.3026	NaN	1.1153	1.1211	NaN	0.60273	NaN	0.9234	0.93108	NaN	1.1603	0.95389	1.266	1.0182	NaN	1.1336	0.97636	0.89065	1.1125	1.0512	1.1761	1.1298
Q15070;E7EVY0;J3KNA0;Q15070-2;Q15070-3;C9JC63	Q15070;E7EVY0;J3KNA0;Q15070-2;Q15070-3	7;7;7;6;4;3	7;7;7;6;4;3	7;7;7;6;4;3	Mitochondrial inner membrane protein OXA1L	OXA1L	>sp|Q15070|OXA1L_HUMAN Mitochondrial inner membrane protein OXA1L OS=Homo sapiens GN=OXA1L PE=1 SV=3;>tr|E7EVY0|E7EVY0_HUMAN Mitochondrial inner membrane protein OXA1L OS=Homo sapiens GN=OXA1L PE=2 SV=1;>tr|J3KNA0|J3KNA0_HUMAN Mitochondrial inner membrane	6	7	7	7	18.2	18.2	18.2	48.547	435	435;408;495;419;263;112	NaN	NaN	NaN	NaN	NaN	NaN	NaN	NaN	NaN	NaN	NaN	NaN	NaN	NaN	NaN	NaN	NaN	NaN	0.94547	NaN	1.0077	NaN	NaN	0.51335	0.6212	1.2554	NaN	NaN	NaN	0.98941	0.88274	0.91196
Q9UM54-6;E7EW20;Q9UM54;Q9UM54-5;Q9UM54-4;Q9UM54-2;Q9UM54-1	Q9UM54-6;E7EW20;Q9UM54;Q9UM54-5;Q9UM54-4;Q9UM54-2;Q9UM54-1	15;15;14;14;14;14;14	15;15;14;14;14;14;14	15;15;14;14;14;14;14	Unconventional myosin-VI	MYO6	>sp|Q9UM54-6|MYO6_HUMAN Isoform 6 of Unconventional myosin-VI OS=Homo sapiens GN=MYO6;>tr|E7EW20|E7EW20_HUMAN Unconventional myosin-VI OS=Homo sapiens GN=MYO6 PE=2 SV=1;>sp|Q9UM54|MYO6_HUMAN Unconventional myosin-VI OS=Homo sapiens GN=MYO6 PE=1 SV=4;>sp|Q9	7	15	15	15	15.9	15.9	15.9	148.66	1285	1285;1286;1294;1253;1285;1262;1285	NaN	NaN	NaN	NaN	NaN	NaN	NaN	NaN	NaN	NaN	NaN	NaN	NaN	NaN	NaN	NaN	NaN	NaN	NaN	NaN	NaN	NaN	NaN	NaN	NaN	NaN	NaN	NaN	NaN	NaN	NaN	NaN
Q13356;Q13356-2;E7EW80	Q13356;Q13356-2;E7EW80	2;2;2	2;2;2	2;2;2	Peptidyl-prolyl cis-trans isomerase-like 2	PPIL2	>sp|Q13356|PPIL2_HUMAN Peptidyl-prolyl cis-trans isomerase-like 2 OS=Homo sapiens GN=PPIL2 PE=1 SV=1;>sp|Q13356-2|PPIL2_HUMAN Isoform 2 of Peptidyl-prolyl cis-trans isomerase-like 2 OS=Homo sapiens GN=PPIL2;>tr|E7EW80|E7EW80_HUMAN Peptidyl-prolyl cis-trans	3	2	2	2	4.6	4.6	4.6	58.823	520	520;527;489	NaN	NaN	NaN	NaN	NaN	NaN	NaN	NaN	NaN	NaN	NaN	NaN	NaN	NaN	NaN	NaN	NaN	NaN	NaN	NaN	NaN	NaN	NaN	NaN	NaN	NaN	NaN	NaN	NaN	NaN	NaN	NaN
[truncated: 4,629 more rows]
[truncated: 7 more columns]

## Sheet: Total filtered and replaced
Protein IDs	Majority protein IDs	Peptide counts (all)	Peptide counts (razor+unique)	Peptide counts (unique)	Protein names	Gene names	Fasta headers	Number of proteins	Peptides	Razor + unique peptides	Unique peptides	Sequence coverage [%]	Unique + razor sequence coverage [%]	Unique sequence coverage [%]	Mol. weight [kDa]	Sequence length	Sequence lengths	Ratio H/L Control_01_0min	Ratio H/L Control_01_10min	Ratio H/L Control_01_15min	Ratio H/L Control_01_17min	Ratio H/L Control_01_19min	Ratio H/L Control_01_21min	Ratio H/L Control_01_23min	Ratio H/L Control_01_25min	Ratio H/L Control_01_27min	Ratio H/L Control_01_29min	Ratio H/L Control_01_31min	Ratio H/L Control_01_33min	Ratio H/L Control_01_35min	Ratio H/L Control_01_37min	Ratio H/L Control_01_39min	Ratio H/L Control_01_41min	Ratio H/L Control_01_43min	Ratio H/L Control_01_45min	Ratio H/L Control_02_0min	Ratio H/L Control_02_10min	Ratio H/L Control_02_15min	Ratio H/L Control_02_17min	Ratio H/L Control_02_19min	Ratio H/L Control_02_21min	Ratio H/L Control_02_23min	Ratio H/L Control_02_25min	Ratio H/L Control_02_27min	Ratio H/L Control_02_29min	Ratio H/L Control_02_31min	Ratio H/L Control_02_33min	Ratio H/L Control_02_35min	Ratio H/L Control_02_37min
[truncated: 5,077 more rows]
[truncated: 7 more columns]

[truncated: 5 more sheets: Total proteome clustered Output, Phospho-proteome MS Data, Phospho filtered and replaced, Phospho Clustered output, Cluster Half-lives]
