# Supplementary material for: Ordered dephosphorylation initiated by the selective proteolysis of cyclin B drives mitotic exit
Source: eLife. 2020 Sep 1;9:e59885. doi: 10.7554/eLife.59885 (PMC7529458; doi:10.7554/eLife.59885)
Supplement: Figure 6—source data 1. [file elife-59885-fig6-data1.xlsx]

## Sheet: Phospho-site MS data DMSO APCCi
Ratio H/L DMSO 00 min	Ratio H/L DMSO 01 min	Ratio H/L DMSO 02 min	Ratio H/L DMSO 03 min	Ratio H/L DMSO 04 min	Ratio H/L DMSO 05 min	Ratio H/L DMSO 06 min	Ratio H/L DMSO 07 min	Ratio H/L DMSO 08 min	Ratio H/L DMSO 09 min	Ratio H/L DMSO 10 min	Ratio H/L DMSO 15 min	Ratio H/L DMSO 20 min	Ratio H/L DMSO 25 min	Ratio H/L DMSO 30 min	Ratio H/L DMSO 40 min	Ratio H/L DMSO 50 min	Ratio H/L DMSO 60 min	Ratio H/L APC/Ci 00 min	Ratio H/L APC/Ci 01 min	Ratio H/L APC/Ci 02 min	Ratio H/L APC/Ci 03 min	Ratio H/L APC/Ci 04 min	Ratio H/L APC/Ci 05 min	Ratio H/L APC/Ci 06 min	Ratio H/L APC/Ci 07 min	Ratio H/L APC/Ci 08 min	Ratio H/L APC/Ci 09 min	Ratio H/L APC/Ci 10 min	Ratio H/L APC/Ci 15 min	Ratio H/L APC/Ci 20 min	Ratio H/L APC/Ci 25 min	Ratio H/L APC/Ci 30 min	Ratio H/L APC/Ci 40 min	Ratio H/L APC/Ci 50 min	Ratio H/L APC/Ci 60 min	Amino acid	Charge	Reverse	Potential contaminant	Localization prob	PEP	Score	Delta score	Score for localization	Mass error [ppm]	Intensity	Intensity L	Intensity H	Position
NaN	NaN	NaN	NaN	NaN	NaN	NaN	NaN	NaN	NaN	NaN	NaN	NaN	NaN	NaN	NaN	NaN	NaN	NaN	NaN	NaN	NaN	NaN	NaN	NaN	NaN	NaN	1.1241	NaN	NaN	1.0129	NaN	NaN	NaN	NaN	0.745	S	3			0.931467	0.00160719	66.708	39.765	66.708	0.92709	8085700	4587000	3498800	755
NaN	NaN	NaN	NaN	NaN	NaN	NaN	NaN	NaN	NaN	NaN	NaN	NaN	NaN	NaN	NaN	NaN	NaN	NaN	NaN	NaN	NaN	NaN	NaN	NaN	NaN	NaN	NaN	0.94553	NaN	NaN	NaN	NaN	NaN	NaN	NaN	S	3			0.863092	0.00171014	82.705	53.613	82.705	0.1163	6488600	5252000	1236600	758
NaN	NaN	NaN	NaN	NaN	NaN	NaN	NaN	NaN	NaN	NaN	NaN	NaN	NaN	NaN	NaN	NaN	NaN	NaN	NaN	NaN	NaN	NaN	0.78022	0.80623	NaN	0.89889	0.94072	1.634	NaN	NaN	NaN	NaN	NaN	2.2197	2.8078	S	4			0.895813	0.00203516	45.276	31.613	45.276	-0.22055	59106000	21567000	37539000	691
NaN	NaN	NaN	NaN	NaN	NaN	NaN	NaN	NaN	NaN	NaN	NaN	NaN	NaN	NaN	NaN	NaN	NaN	NaN	NaN	NaN	NaN	NaN	0.78022	0.80623	NaN	0.89889	0.94072	1.634	NaN	NaN	NaN	NaN	NaN	2.2197	2.8078	S	4			0.929145	0.00203516	45.276	31.613	45.276	-0.22055	59106000	21567000	37539000	693
NaN	NaN	NaN	NaN	NaN	NaN	NaN	NaN	NaN	NaN	NaN	NaN	NaN	NaN	NaN	NaN	NaN	NaN	NaN	NaN	NaN	NaN	NaN	NaN	NaN	NaN	NaN	NaN	NaN	NaN	NaN	NaN	NaN	NaN	NaN	NaN	S	2			0.376346	0.00369193	76.78	39.603	76.78	0.68331	0	0	0	737
NaN	NaN	NaN	NaN	NaN	NaN	NaN	NaN	NaN	NaN	NaN	NaN	NaN	NaN	NaN	NaN	NaN	NaN	NaN	NaN	NaN	NaN	NaN	NaN	NaN	NaN	NaN	NaN	NaN	NaN	NaN	NaN	NaN	NaN	NaN	NaN	S	2			0.352202	0.000390727	100.45	44.695	86.258	0.35328	0	0	0	738
1.162	0.66632	0.65521	NaN	0.64727	0.62758	0.3724	0.6346	0.41782	0.30267	0.33455	0.26806	0.16842	0.12374	NaN	NaN	NaN	NaN	1.1378	0.64101	0.48248	0.50538	0.59362	0.49463	0.4588	0.52528	0.37035	0.40313	0.55213	0.24531	NaN	NaN	NaN	NaN	NaN	NaN	S	3			0.999996	2.80837e-06	278.62	246.37	266.07	0.037578	579310000	396720000	182590000	739
1.1393	0.77799	0.74221	0.6309	0.67174	0.81842	0.61835	0.87184	0.81103	0.47854	0.65617	0.65627	0.53894	0.45082	0.34729	0.1856	0.14747	0.11606	1.0189	0.78103	0.58009	0.72545	0.77974	0.7783	0.6966	0.65835	0.68131	0.5818	0.90575	0.4829	0.52701	0.46662	0.35547	0.26389	0.22605	0.21779	S	3			1	3.92337e-11	365.28	315.19	240	-0.048652	8514800000	5065200000	3449700000	743
1.3037	0.63716	0.70873	0.33441	0.31523	0.42597	0.29461	0.59795	0.33769	0.21921	0.40483	0.74047	0.59992	0.53254	NaN	NaN	NaN	NaN	0.97682	0.71064	NaN	0.42745	0.8986	0.7071	0.56597	NaN	NaN	0.41456	0.49561	NaN	0.80587	0.40369	NaN	NaN	NaN	NaN	S	3			1	0.000377623	290.38	214.7	240	-0.048652	283960000	180390000	103570000	748
NaN	NaN	NaN	NaN	NaN	NaN	NaN	NaN	NaN	NaN	NaN	NaN	NaN	NaN	NaN	NaN	NaN	NaN	NaN	NaN	NaN	NaN	1.3853	NaN	NaN	NaN	NaN	NaN	NaN	NaN	NaN	NaN	NaN	NaN	NaN	NaN	S	3			0.999986	0.000911229	103.31	68.561	103.31	-0.56942	7224300	3243500	3980800	1066
1.0977	0.76327	0.76133	0.58998	0.62685	0.78856	0.68161	0.83066	0.89996	0.61078	0.99949	0.65048	1.0449	0.61832	0.69928	0.98275	0.4982	0.74483	1.0134	0.73899	1.3071	0.82941	0.65366	0.56229	0.81648	0.77652	0.8888	0.66438	0.92688	0.71435	0.71556	0.75927	0.65917	0.27943	0.67955	0.6048	S	3			1	8.18309e-11	115.38	88.113	115.38	0.10357	1659000000	912480000	746520000	619
NaN	NaN	0.28389	0.24056	NaN	NaN	NaN	NaN	NaN	NaN	NaN	NaN	NaN	NaN	NaN	NaN	NaN	NaN	1.0324	NaN	0.27146	0.25914	NaN	NaN	NaN	NaN	NaN	NaN	NaN	NaN	NaN	NaN	NaN	NaN	NaN	NaN	S	2			0.972238	5.16622e-08	139	79.78	106.38	-0.13725	83543000	66504000	17039000	512
1.018	0.53923	NaN	NaN	0.19897	NaN	NaN	NaN	NaN	NaN	NaN	NaN	NaN	NaN	NaN	0.18612	NaN	NaN	NaN	NaN	NaN	NaN	NaN	NaN	NaN	NaN	NaN	NaN	NaN	NaN	NaN	NaN	NaN	NaN	NaN	NaN	S	2			0.848423	1.69309e-15	163.9	126.3	146.1	-0.45622	75781000	54853000	20927000	514
1.1992	NaN	NaN	NaN	NaN	NaN	NaN	NaN	NaN	NaN	NaN	NaN	NaN	NaN	NaN	NaN	NaN	NaN	NaN	0.569	NaN	NaN	NaN	NaN	NaN	NaN	NaN	NaN	NaN	NaN	NaN	NaN	NaN	NaN	NaN	NaN	S	2			0.968147	9.26779e-23	176.17	125.08	155.2	-0.14942	142280000	102290000	39992000	515
0.95536	0.78895	0.702	0.71791	0.71092	0.73021	0.49101	0.68793	0.56999	0.29928	0.25596	0.20311	0.69364	0.74775	0.57296	0.49087	0.56686	0.40299	1.0582	0.88038	0.70109	0.73611	0.78757	0.75021	0.45265	0.48774	0.47649	0.68387	0.33972	1.0056	0.61008	0.71528	NaN	0.47126	NaN	NaN	S	3			0.999434	8.61242e-07	91.926	69.296	83.202	0.55005	2084500000	1340800000	743720000	532
NaN	0.56949	NaN	0.57308	0.81857	0.59302	0.63748	0.60741	0.54314	0.56507	0.49649	0.62297	0.69364	NaN	0.57296	0.49087	0.56686	0.40299	0.89415	1.0384	NaN	0.73769	0.50835	0.38981	0.67997	0.66392	1.076	0.35611	1.0019	0.68165	0.90254	0.50059	0.41912	0.56827	0.94769	0.40163	S	3			0.999684	7.30118e-06	83.202	55.778	68.309	-0.18752	713320000	437230000	276090000	534
0.889	NaN	NaN	0.65709	NaN	NaN	NaN	NaN	NaN	NaN	NaN	NaN	NaN	NaN	NaN	NaN	NaN	NaN	NaN	NaN	NaN	NaN	NaN	NaN	NaN	NaN	NaN	NaN	NaN	NaN	NaN	NaN	NaN	NaN	NaN	NaN	S	2			0.874591	3.93173e-62	212	188.13	199.94	0.080351	250020000	140020000	110010000	493
0.98318	0.72192	0.72552	NaN	0.7733	0.72479	0.67549	0.84665	0.81558	0.64354	0.65613	0.73941	0.96392	0.94092	0.76045	0.68291	1.6221	0.33681	1.0033	0.6623	0.61164	0.61601	0.65729	0.67367	0.70051	0.67629	0.68826	0.68147	0.71713	0.62992	0.71674	0.57703	0.52827	0.48657	0.48026	0.38626	S	2			0.995107	1.61807e-114	251.7	226.75	149.9	0.29023	6472400000	3768600000	2703800000	494
0.97601	0.57336	0.56334	0.55584	0.58627	0.59932	0.5056	0.67289	0.54811	0.42461	0.39469	0.20074	0.13583	0.10653	NaN	NaN	NaN	NaN	1.2868	0.65272	0.51242	0.6078	0.60778	0.4463	0.57333	0.41513	0.41028	NaN	0.48494	0.19995	0.18154	0.12817	NaN	NaN	0.077257	NaN	S	2			1	0.000126378	112.5	73.536	103.88	0.060848	267700000	183650000	84049000	76
NaN	NaN	NaN	NaN	0.66402	NaN	NaN	NaN	NaN	NaN	NaN	NaN	NaN	NaN	NaN	NaN	NaN	NaN	NaN	NaN	NaN	NaN	NaN	NaN	NaN	NaN	NaN	NaN	NaN	NaN	0.78082	NaN	NaN	NaN	NaN	NaN	S	2			0.7053	0.00344396	66.977	32.106	40.798	2.6066	31175000	19011000	12164000	823
NaN	NaN	NaN	NaN	NaN	NaN	NaN	NaN	NaN	NaN	NaN	NaN	NaN	NaN	NaN	NaN	NaN	NaN	NaN	NaN	NaN	NaN	NaN	NaN	NaN	NaN	NaN	NaN	NaN	NaN	NaN	NaN	NaN	0.50833	NaN	NaN	S	2			0.685244	0.0032642	69.979	48.303	66.738	0.31907	18065000	8097900	9967500	824
0.86286	NaN	NaN	0.52026	NaN	0.65019	0.52966	NaN	0.72851	NaN	0.62292	NaN	0.61245	NaN	NaN	0.38218	NaN	NaN	NaN	NaN	0.59117	0.72249	NaN	NaN	NaN	NaN	NaN	NaN	NaN	0.51406	NaN	0.54725	0.47721	NaN	NaN	NaN	S	2			0.999397	5.2654e-05	110.32	76.215	108.71	-0.085812	273750000	146420000	127330000	827
0.92636	0.56239	0.46363	NaN	0.6269	NaN	NaN	0.6919	0.5927	0.30884	NaN	NaN	0.1702	NaN	NaN	NaN	NaN	NaN	NaN	0.78142	0.42189	0.61068	0.71433	NaN	NaN	0.44254	0.50214	NaN	0.54358	0.25489	NaN	NaN	NaN	NaN	NaN	NaN	S	4			0.976408	0.000284377	68.576	46.525	56.488	-0.083652	506240000	338870000	167380000	962
1.0043	NaN	NaN	NaN	NaN	0.75277	0.66793	0.78556	0.87909	0.62162	NaN	NaN	NaN	NaN	0.65952	NaN	NaN	0.454	1.0542	0.76001	NaN	0.74094	NaN	NaN	NaN	0.6737	0.673	NaN	NaN	0.70666	NaN	0.58966	0.54432	NaN	0.61393	NaN	S	3			0.949857	5.14491e-05	89.756	76.133	58.319	-0.32505	432290000	226700000	205590000	291
NaN	0.62787	0.72276	0.59551	0.63882	NaN	0.70486	0.79669	0.85393	NaN	0.66435	0.58312	0.74888	0.66647	0.67598	0.71566	NaN	0.454	0.89964	0.76001	0.7954	0.72158	NaN	0.5798	0.76654	0.64567	NaN	0.77377	0.82889	NaN	0.40461	0.67204	0.5839	NaN	0.57303	NaN	S	4			0.965015	2.56492e-05	95.195	79.066	92.034	-0.10975	692400000	405330000	287070000	293
NaN	NaN	NaN	NaN	NaN	NaN	NaN	NaN	NaN	NaN	NaN	NaN	NaN	NaN	NaN	NaN	NaN	NaN	NaN	NaN	NaN	NaN	NaN	2.0263	2.4816	1.865	NaN	1.7894	NaN	NaN	1.3951	1.2427	1.536	1.6376	2.0565	NaN	S	2			0.999302	8.99689e-13	147.11	120.76	147.11	0.12233	24041000	9158100	14882000	473
NaN	NaN	1.1691	NaN	NaN	NaN	NaN	0.79025	NaN	NaN	0.67693	0.53057	0.38239	NaN	NaN	NaN	NaN	NaN	NaN	NaN	NaN	NaN	NaN	NaN	NaN	NaN	NaN	NaN	NaN	NaN	NaN	NaN	NaN	NaN	NaN	NaN	S	2			0.965158	0.00226198	72.583	32.2	72.583	0.3942	89648000	49165000	40484000	273
1.0264	0.96479	0.97111	0.66788	0.78883	1.0562	0.70876	1.046	0.85737	0.45528	0.56756	0.4004	0.36629	0.2603	0.22436	0.21269	NaN	NaN	1.1408	0.76627	NaN	0.77786	NaN	0.55664	0.75317	0.864	0.66043	0.6296	NaN	NaN	NaN	NaN	NaN	0.11947	NaN	NaN	S	2			0.983791	0.000238965	88.951	12.258	88.951	0.80571	549480000	333510000	215970000	274
1.0008	0.97611	1.1691	0.62779	0.73842	1.1603	0.74887	0.79025	0.82287	0.4943	0.67693	0.53057	0.38239	0.24535	0.22436	0.21269	NaN	NaN	NaN	NaN	NaN	NaN	NaN	NaN	NaN	NaN	NaN	NaN	NaN	NaN	NaN	NaN	NaN	NaN	NaN	NaN	S	2			0.977311	0.000238965	88.951	12.258	88.951	0.80571	360030000	221320000	138710000	275
1.0264	0.82047	0.94821	0.86675	0.78883	0.76619	0.66657	0.90106	0.89047	0.41933	0.48265	0.46517	NaN	0.3113	NaN	NaN	NaN	NaN	1.1408	0.76627	NaN	0.77786	NaN	0.55664	0.75317	0.864	0.66043	0.6296	NaN	NaN	NaN	NaN	NaN	0.11947	NaN	NaN	S	2			0.980578	0.00226198	72.583	32.2	58.712	0.25682	219850000	132490000	87363000	278
1.1222	0.76466	0.60364	0.5943	0.6342	0.72933	0.54629	0.59681	0.51794	NaN	0.3116	NaN	NaN	NaN	NaN	NaN	NaN	NaN	0.84407	0.57734	0.61566	0.79064	0.60005	0.67494	0.60029	0.44871	NaN	NaN	0.36444	NaN	NaN	NaN	NaN	NaN	NaN	NaN	S	2			0.997965	0.00125523	111.06	111.06	93.598	0.13639	159100000	109680000	49423000	214
NaN	NaN	NaN	NaN	NaN	NaN	NaN	NaN	NaN	NaN	NaN	NaN	NaN	NaN	NaN	NaN	NaN	NaN	NaN	1.0065	1.5829	1.2438	1.7159	1.265	1.1503	1.725	1.359	1.5213	1.7656	1.0469	0.66994	0.65659	0.31548	NaN	0.2092	NaN	S	3			0.956841	0.00015707	80.859	61.439	80.859	0.39627	72050000	34400000	37650000	272
NaN	NaN	NaN	NaN	NaN	NaN	NaN	NaN	NaN	NaN	NaN	NaN	NaN	NaN	NaN	NaN	NaN	NaN	NaN	1.0065	1.5829	1.2438	1.7159	1.265	1.1503	1.725	1.359	1.5213	1.7656	1.0469	0.66994	0.65659	0.31548	NaN	0.2092	NaN	S	3			0.844513	0.00015707	80.859	61.439	42.639	0.66134	73878000	36228000	37650000	277
1.2427	0.97134	1.1606	0.82098	1.0019	0.83218	0.9156	1.0789	0.98861	0.57238	0.99325	1.2705	1.0411	1.8708	1.394	1.1647	1.3818	1.0748	1.3766	1.2339	0.89659	NaN	1.3814	NaN	NaN	NaN	NaN	NaN	1.2442	1.3639	1.5209	1.4084	1.2625	1.4399	1.4006	1.386	S	3			0.999907	2.5723e-06	118.23	90.519	118.23	0.058486	291820000	143980000	147840000	474
NaN	NaN	NaN	NaN	NaN	NaN	NaN	NaN	NaN	NaN	NaN	NaN	NaN	NaN	NaN	NaN	NaN	NaN	NaN	NaN	NaN	NaN	NaN	NaN	NaN	NaN	NaN	NaN	NaN	NaN	NaN	NaN	NaN	NaN	NaN	NaN	S	3			0.818345	0.000207962	57.629	36.732	57.629	0.48042	3738600	3738600	0	92
NaN	NaN	NaN	NaN	NaN	NaN	NaN	NaN	NaN	NaN	NaN	0.74066	NaN	NaN	NaN	NaN	0.94262	0.89558	NaN	NaN	NaN	NaN	NaN	NaN	NaN	0.76729	NaN	NaN	NaN	NaN	NaN	0.82868	NaN	0.84571	0.64421	NaN	S	3			0.950752	1.04396e-07	96.181	74.888	96.181	-0.90027	33832000	18613000	15219000	184
1.0143	NaN	NaN	NaN	NaN	NaN	NaN	NaN	NaN	NaN	NaN	NaN	NaN	NaN	NaN	NaN	NaN	NaN	NaN	NaN	NaN	NaN	NaN	NaN	NaN	NaN	NaN	NaN	NaN	NaN	NaN	NaN	NaN	NaN	NaN	NaN	S	2			0.999863	7.31348e-05	107.98	50.543	107.98	0.042664	70115000	53467000	16648000	666
NaN	NaN	NaN	NaN	NaN	NaN	NaN	NaN	NaN	NaN	NaN	NaN	NaN	NaN	NaN	NaN	NaN	NaN	NaN	NaN	NaN	NaN	NaN	NaN	NaN	NaN	NaN	NaN	NaN	NaN	NaN	NaN	NaN	NaN	NaN	NaN	S	2			0.999141	0.000224348	93.5	66.472	87.319	1.884	0	0	0	10
NaN	0.68614	0.91199	0.55617	0.45169	0.52366	0.47993	NaN	NaN	NaN	NaN	NaN	NaN	NaN	NaN	NaN	NaN	NaN	1.1376	0.59104	NaN	0.46701	0.30667	NaN	NaN	NaN	NaN	NaN	NaN	NaN	NaN	NaN	NaN	NaN	NaN	NaN	S	3			1	0.000167567	244.23	209.75	191.63	0.09937	81786000	62489000	19297000	811
NaN	NaN	0.96286	1.2422	NaN	NaN	NaN	NaN	1.4136	NaN	NaN	1.0766	1.7888	1.0898	1.7323	1.4131	1.2618	0.95299	NaN	NaN	1.1723	1.1482	1.5669	NaN	NaN	NaN	NaN	NaN	NaN	NaN	NaN	NaN	NaN	NaN	NaN	NaN	S	2			1	9.92189e-41	186.44	155.3	186.44	-0.35489	54172000	24833000	29339000	402
1.0295	NaN	NaN	NaN	NaN	NaN	NaN	NaN	NaN	NaN	NaN	NaN	NaN	NaN	NaN	NaN	NaN	NaN	NaN	NaN	0.51356	0.56101	NaN	NaN	NaN	0.57833	NaN	NaN	0.80405	0.52813	NaN	NaN	NaN	NaN	NaN	NaN	S	2			0.996881	0.00125523	109.29	19.592	109.29	0.3678	12753000	8107400	4645300	736
NaN	NaN	NaN	NaN	NaN	NaN	NaN	NaN	NaN	NaN	NaN	NaN	NaN	NaN	NaN	NaN	NaN	NaN	NaN	NaN	NaN	NaN	NaN	NaN	NaN	NaN	NaN	NaN	NaN	NaN	NaN	NaN	NaN	NaN	NaN	NaN	S	3			0.338869	0.00389265	55.208	17.358	55.208	0.17343	0	0	0	1153
NaN	NaN	NaN	NaN	NaN	NaN	NaN	NaN	NaN	NaN	NaN	NaN	NaN	NaN	NaN	NaN	NaN	NaN	NaN	0.91068	NaN	NaN	NaN	NaN	NaN	NaN	NaN	NaN	NaN	NaN	NaN	NaN	NaN	NaN	NaN	NaN	S	3			0.502644	0.000828903	54.306	34.953	44.848	-1.0294	6910100	4001400	2908600	1155
1.1669	NaN	NaN	NaN	NaN	NaN	NaN	NaN	NaN	NaN	0.68789	NaN	0.71248	NaN	NaN	NaN	NaN	NaN	1.0545	NaN	1.0252	0.74779	0.84204	NaN	NaN	NaN	NaN	NaN	NaN	NaN	NaN	NaN	NaN	NaN	NaN	NaN	S	3			0.551236	0.000627021	57.142	32.189	45.243	-0.3246	62736000	33284000	29452000	1156
0.97968	0.75977	0.55095	0.86809	0.75914	0.71038	0.78783	0.85391	0.80499	1.0033	NaN	NaN	NaN	0.62037	0.90776	NaN	0.78456	0.65418	1.0546	0.84223	0.80165	0.5608	0.83652	NaN	0.66406	NaN	NaN	0.65162	0.99711	0.65089	NaN	0.86776	NaN	NaN	0.87274	NaN	S	3			0.993801	0.000543037	147.73	109.43	147.73	0.026968	61115000	35993000	25122000	603
1.3692	0.54762	NaN	NaN	0.81309	NaN	0.70246	0.78798	NaN	NaN	0.33799	NaN	NaN	NaN	NaN	NaN	NaN	NaN	NaN	NaN	NaN	NaN	NaN	NaN	NaN	NaN	NaN	NaN	NaN	NaN	NaN	NaN	NaN	NaN	NaN	NaN	S	2			0.685158	0.000331907	99.669	34.724	69.672	0.47307	22730000	12518000	10212000	243
1.3216	NaN	1.108	0.70188	1.1914	0.7267	NaN	0.78713	1.0064	1.0027	0.79306	0.77578	0.88897	0.8767	1.1845	0.89382	0.5189	0.90494	1.1739	0.76051	0.97308	0.83263	0.8384	0.49181	0.6357	0.70681	0.65544	0.88751	0.66802	0.74975	0.56507	0.68373	0.65096	NaN	1.1928	NaN	S	3			1	1.6985e-06	293.38	256.22	293.38	-0.54157	172260000	91894000	80366000	357
NaN	NaN	NaN	NaN	NaN	NaN	NaN	NaN	NaN	NaN	NaN	NaN	NaN	NaN	NaN	NaN	NaN	NaN	1.1625	0.75628	0.47286	0.62721	0.6325	NaN	NaN	NaN	NaN	NaN	NaN	NaN	NaN	NaN	NaN	NaN	NaN	NaN	S	2			0.995536	9.10295e-05	101.38	72.305	101.38	0.2871	29760000	16861000	12899000	264
0.96572	0.79035	NaN	NaN	0.58874	NaN	NaN	NaN	NaN	NaN	NaN	NaN	NaN	0.095551	NaN	NaN	NaN	NaN	NaN	NaN	NaN	0.46801	NaN	0.27137	0.41444	NaN	0.3566	0.30973	NaN	0.14644	NaN	0.1329	0.1372	NaN	NaN	0.12213	S	3			0.997104	4.71081e-06	84.166	67.02	84.166	-0.24186	402640000	271400000	131240000	674
0.91538	NaN	NaN	NaN	NaN	NaN	NaN	NaN	NaN	NaN	NaN	NaN	NaN	NaN	NaN	NaN	NaN	NaN	NaN	NaN	NaN	NaN	NaN	NaN	NaN	NaN	NaN	NaN	NaN	NaN	NaN	NaN	NaN	NaN	NaN	NaN	S	2			0.999998	0.00201915	105.13	41.44	105.13	0.5906	40246000	33209000	7037500	291
NaN	NaN	NaN	NaN	NaN	NaN	NaN	NaN	NaN	NaN	NaN	NaN	NaN	NaN	NaN	NaN	NaN	NaN	NaN	NaN	NaN	NaN	NaN	NaN	NaN	NaN	NaN	NaN	NaN	NaN	NaN	NaN	NaN	NaN	NaN	NaN	S	2			1	8.09011e-05	84.753	42.405	55.291	-0.59038	0	0	0	2
1.0126	0.758	0.58901	0.50571	0.40704	0.43819	0.26946	0.32677	NaN	NaN	0.077934	NaN	NaN	NaN	NaN	NaN	NaN	NaN	1.0073	0.71999	0.49252	NaN	0.483	NaN	0.25771	NaN	0.12593	NaN	NaN	0.064616	NaN	NaN	NaN	NaN	NaN	NaN	S	2			0.999648	3.59514e-05	131.83	84.12	97.163	-0.08033	395610000	292850000	102750000	246
NaN	NaN	NaN	NaN	NaN	NaN	NaN	NaN	NaN	NaN	NaN	NaN	NaN	NaN	NaN	NaN	NaN	NaN	NaN	NaN	NaN	NaN	NaN	NaN	NaN	NaN	NaN	NaN	NaN	NaN	NaN	NaN	NaN	NaN	NaN	NaN	S	2			0.865231	6.80141e-05	100.58	69.177	100.58	0.09172	4055800	0	4055800	271
NaN	NaN	NaN	NaN	NaN	NaN	NaN	NaN	NaN	NaN	NaN	NaN	NaN	NaN	NaN	NaN	NaN	NaN	NaN	NaN	NaN	NaN	NaN	NaN	NaN	NaN	NaN	NaN	NaN	NaN	NaN	NaN	NaN	NaN	NaN	NaN	S	3			0.48192	2.10653e-08	102.43	83.41	102.43	0.14221	0	0	0	274
NaN	NaN	NaN	NaN	NaN	0.70224	NaN	NaN	NaN	NaN	NaN	NaN	NaN	NaN	0.21515	NaN	NaN	NaN	NaN	NaN	NaN	NaN	NaN	NaN	NaN	NaN	NaN	NaN	0.40173	NaN	NaN	NaN	NaN	NaN	NaN	0.13086	S	3			0.707516	2.10653e-08	102.43	83.41	90.06	0.066866	329460000	214810000	114650000	275
NaN	NaN	NaN	NaN	0.69031	NaN	NaN	NaN	NaN	NaN	NaN	NaN	NaN	NaN	NaN	NaN	NaN	NaN	NaN	NaN	NaN	NaN	NaN	NaN	NaN	NaN	NaN	NaN	NaN	NaN	NaN	NaN	NaN	NaN	NaN	NaN	S	3			0.51484	4.018e-05	72.167	54.489	58.5	0.20921	76159000	44208000	31951000	277
NaN	NaN	0.82084	NaN	NaN	NaN	0.48549	NaN	NaN	0.26684	NaN	NaN	NaN	NaN	NaN	NaN	NaN	0.096732	NaN	NaN	0.66643	0.64373	NaN	NaN	NaN	NaN	NaN	NaN	NaN	NaN	NaN	NaN	NaN	NaN	NaN	NaN	S	3			0.761817	5.58418e-05	69.272	47.587	56.131	0.69765	521660000	367850000	153800000	278
0.96324	NaN	NaN	0.48626	NaN	NaN	NaN	NaN	NaN	NaN	NaN	NaN	NaN	NaN	NaN	NaN	NaN	NaN	NaN	NaN	NaN	NaN	NaN	0.59693	NaN	0.49139	NaN	NaN	NaN	NaN	NaN	NaN	NaN	NaN	NaN	NaN	S	3			0.887104	6.99798e-08	95.19	76.133	59.226	0.33032	194000000	101950000	92055000	935
NaN	NaN	NaN	NaN	NaN	NaN	NaN	NaN	NaN	NaN	NaN	NaN	NaN	NaN	NaN	NaN	NaN	NaN	NaN	NaN	NaN	NaN	NaN	NaN	0.54572	NaN	NaN	NaN	NaN	NaN	NaN	NaN	0.37482	NaN	NaN	NaN	S	3			0.719089	4.1251e-05	67.396	50.931	60.762	0.69475	41029000	27079000	13950000	939
0.84546	NaN	NaN	NaN	NaN	NaN	NaN	NaN	NaN	NaN	NaN	NaN	NaN	NaN	NaN	NaN	NaN	NaN	NaN	NaN	NaN	NaN	NaN	0.48277	0.81127	0.75766	0.62857	NaN	0.84656	0.60385	NaN	0.52485	0.48855	0.5353	0.51244	0.46285	S	3			0.774635	0.00415899	78.848	44.584	78.848	-0.18504	76456000	44425000	32031000	654
1.1023	0.65001	0.95784	NaN	0.64581	0.46872	NaN	0.6064	0.69618	NaN	0.54426	0.34196	0.31951	0.18185	NaN	NaN	NaN	NaN	0.9961	0.58322	NaN	0.57662	0.58073	0.47959	NaN	0.79641	0.85455	NaN	NaN	NaN	NaN	NaN	NaN	NaN	NaN	NaN	S	2			0.998489	0.000546694	89.231	54.481	67.234	0.029183	90221000	58105000	32115000	199
NaN	NaN	NaN	NaN	NaN	0.76631	NaN	0.95488	NaN	NaN	NaN	NaN	NaN	NaN	NaN	NaN	NaN	0.69941	NaN	NaN	NaN	NaN	NaN	NaN	NaN	NaN	NaN	NaN	NaN	NaN	NaN	NaN	NaN	NaN	NaN	NaN	S	2			0.999986	0.0031755	77.031	43.442	77.031	0.44584	501810000	279040000	222770000	1263
NaN	NaN	NaN	NaN	NaN	0.76631	NaN	0.95488	NaN	NaN	NaN	NaN	NaN	NaN	NaN	NaN	NaN	0.69941	NaN	NaN	NaN	NaN	NaN	NaN	NaN	NaN	NaN	NaN	NaN	NaN	NaN	NaN	NaN	NaN	NaN	NaN	S	2			0.997482	0.0031755	77.031	43.442	57.41	0.53367	501810000	279040000	222770000	1267
NaN	NaN	NaN	NaN	NaN	0.76631	NaN	0.95488	NaN	NaN	NaN	NaN	NaN	NaN	NaN	NaN	NaN	0.69941	NaN	NaN	NaN	NaN	NaN	NaN	NaN	NaN	NaN	NaN	NaN	NaN	NaN	NaN	NaN	NaN	NaN	NaN	S	2			0.987937	0.0031755	77.031	43.442	77.031	0.44584	501810000	279040000	222770000	1272
NaN	0.96415	0.81488	0.75087	0.62685	0.66783	0.45029	1.1923	0.83677	0.75037	1.4813	1.0432	0.84571	2.2233	NaN	0.762	1.6273	0.79713	NaN	NaN	NaN	NaN	NaN	NaN	NaN	NaN	NaN	NaN	NaN	NaN	NaN	NaN	NaN	NaN	NaN	NaN	S	2			1	0.000361128	93.478	47.486	93.478	0.5815	58869000	33043000	25826000	209
NaN	NaN	NaN	NaN	NaN	NaN	NaN	NaN	NaN	NaN	NaN	NaN	NaN	NaN	NaN	NaN	NaN	NaN	NaN	NaN	NaN	NaN	NaN	NaN	NaN	NaN	NaN	NaN	NaN	NaN	NaN	NaN	NaN	NaN	NaN	NaN	S	3			0.809974	0.00438284	61.657	25.894	61.657	0.45321	1722100	1722100	0	856
NaN	NaN	NaN	NaN	NaN	NaN	NaN	NaN	NaN	NaN	NaN	NaN	NaN	NaN	NaN	NaN	NaN	NaN	NaN	NaN	NaN	NaN	NaN	NaN	NaN	NaN	NaN	NaN	NaN	NaN	NaN	NaN	NaN	NaN	NaN	NaN	S	3			0.928491	0.00605563	67.785	40.522	67.785	1.0007	1922400	1922400	0	859
NaN	NaN	NaN	NaN	NaN	NaN	NaN	NaN	NaN	NaN	NaN	NaN	NaN	NaN	NaN	NaN	NaN	NaN	NaN	NaN	NaN	NaN	NaN	NaN	NaN	NaN	NaN	NaN	NaN	NaN	NaN	NaN	NaN	NaN	NaN	NaN	S	2			0.997106	2.08573e-05	104.67	74.425	104.67	-0.97536	180620000	180620000	0	10
1.2162	NaN	1.0173	0.70771	NaN	NaN	0.66646	0.69945	NaN	NaN	NaN	0.66708	NaN	NaN	NaN	0.36986	0.40533	NaN	1.115	0.75088	NaN	NaN	NaN	NaN	NaN	0.49172	NaN	NaN	0.66272	0.3458	NaN	NaN	NaN	NaN	NaN	NaN	S	2		+	0.896962	2.01006e-54	208.88	154.89	80.832	0.080446	128190000	77515000	50676000	901
1.032	0.75601	0.61187	0.72432	0.71191	0.67239	0.61003	0.83817	0.54396	0.63024	0.55508	0.40762	0.25784	0.12071	0.13499	0.092932	0.43784	NaN	1.0073	1.1231	0.74466	0.65779	0.66005	0.7003	0.61978	0.55829	0.53178	0.63197	0.56476	0.35105	0.25208	0.16527	0.12145	0.083205	0.38612	0.079205	S	2		+	0.984074	2.35698e-143	268.31	231.71	220.83	0.43016	2343900000	1511600000	832290000	902
1.0256	0.7334	0.58696	0.68997	1.0443	0.75398	1.3762	0.83429	0.88579	0.55519	0.66855	0.5751	0.59986	0.77426	0.53513	0.47645	0.39423	0.58757	1.2567	0.67219	0.62378	0.45969	1.0299	0.82012	0.64816	0.61157	0.70555	0.58435	0.76229	0.55722	0.60472	0.54494	0.54245	0.4939	0.38612	0.35623	S	3		+	0.999832	4.44527e-41	196.01	161.36	69.986	0.073601	1536000000	949090000	586940000	904
1.0788	0.87537	0.79591	0.74534	0.76465	1.0028	0.91902	NaN	0.88491	1.3621	NaN	NaN	0.78688	0.46427	0.70691	NaN	NaN	0.56522	0.89225	0.66488	1.6979	0.76966	0.56604	0.71257	0.73365	0.80115	NaN	0.67426	0.93126	NaN	0.5851	NaN	NaN	0.58712	NaN	NaN	S	3		+	1	1.86507e-05	224.43	165.16	105.14	0.028084	138240000	74890000	63353000	334
0.89837	0.38803	0.31795	0.30395	0.4838	0.23664	0.36231	0.64546	0.35656	0.33312	1.1696	0.30199	0.51878	0.23251	0.26021	0.31706	0.23005	0.23866	NaN	NaN	0.50579	0.54277	NaN	NaN	NaN	NaN	1.1477	1.2302	NaN	NaN	NaN	NaN	7.6977	NaN	NaN	0.69043	S	3		+	1	1.022e-16	281.99	281.99	188.91	-0.631	490340000	312130000	178210000	46
0.89837	0.46719	0.27957	0.30395	0.51342	0.19601	0.36231	0.64546	0.39252	0.33312	1.1696	0.30199	0.51878	0.23251	0.26021	0.31706	0.23005	0.23866	NaN	NaN	0.50579	0.54277	NaN	NaN	NaN	NaN	1.1477	1.2302	NaN	NaN	NaN	NaN	7.6977	NaN	NaN	0.69043	S	3		+	0.999915	1.022e-16	281.99	281.99	235.66	-0.49991	477480000	303590000	173900000	48
1.0273	0.60099	0.53233	0.48041	0.57982	0.36241	0.97647	0.74015	0.529	0.58744	1.7653	0.48	0.59519	0.3068	1.1679	0.54383	0.3711	0.54289	1.0709	0.93009	0.52237	0.83952	0.60455	1.198	1.3794	1.1529	1.3878	2.651	1.7301	0.84813	0.7747	0.5295	7.6168	0.64913	0.72929	1.6242	S	4		+	1	6.05409e-05	184.51	123.42	111.73	-0.22986	1647200000	869050000	778170000	115
1.0438	0.49335	0.43608	0.45239	0.55871	0.26969	0.5012	0.68075	0.4872	0.37192	2.0319	0.34402	0.60645	0.32776	0.29456	NaN	0.36637	0.32631	1.0379	1.8031	NaN	NaN	0.73608	1.3254	NaN	1.3994	NaN	NaN	1.7402	NaN	0.80026	0.49157	5.3112	0.865	0.76841	2.0753	S	2		+	0.99277	1.55928e-07	137.79	91.377	115.38	0.40411	324490000	164030000	160470000	143
0.82794	0.50144	0.47501	0.44908	0.61577	0.34092	0.74841	0.72907	0.55213	0.53525	1.3804	0.50318	0.59915	0.35434	0.88014	0.55323	0.42075	0.39895	0.95817	1.023	0.44789	0.57615	0.68101	1.0464	1.0531	0.89029	1.0279	1.8664	1.1843	0.6432	0.55816	0.56554	5.9677	0.6212	0.51078	1.1847	S	2		+	1	1.81179e-254	344.66	301.16	272.32	-0.11	2469800000	1322700000	1147100000	35
0.98719	0.4673	0.56333	0.31226	0.87138	0.23606	0.19753	0.20626	0.84387	0.11205	0.10907	0.10739	0.10176	0.36734	0.34286	0.29816	0.32371	0.16126	0.99497	0.47934	0.24404	0.56184	0.27052	0.2125	0.17729	0.13923	0.096621	0.13278	0.1341	0.083163	0.43265	0.30554	0.06078	0.075956	0.073529	0.3049	S	3		+	0.999975	7.15076e-07	284.91	240.47	284.91	0.13757	15921000000	11173000000	4748200000	21
1.0091	NaN	NaN	NaN	NaN	NaN	NaN	0.70099	NaN	NaN	NaN	NaN	NaN	NaN	NaN	NaN	NaN	NaN	NaN	NaN	NaN	NaN	0.71527	0.63827	NaN	NaN	NaN	NaN	0.13673	NaN	NaN	NaN	NaN	NaN	NaN	NaN	S	2		+	0.966326	1.72214e-06	131.45	107.81	131.45	0.06785	7516400000	4274400000	3242000000	22
1.019	0.59986	0.56042	0.55247	0.6205	0.52999	0.4089	0.62635	0.61642	0.1876	0.42766	0.49509	0.32299	0.51389	0.30446	0.30469	0.39396	0.29244	0.93681	0.78514	0.33234	0.58013	0.67771	0.63118	0.50846	0.41184	0.41301	0.48245	0.48812	0.36577	0.41789	0.30506	0.30933	0.36281	0.27124	0.30435	S	3		+	0.999999	1.66312e-05	348.24	317.02	335.1	-0.13306	91553000000	60777000000	30775000000	24
1.0165	NaN	0.49482	0.4732	0.54237	0.4136	NaN	0.48333	NaN	0.2654	0.28688	0.43502	0.27918	0.30455	0.20382	0.14569	0.17756	0.12579	1.02	0.62916	0.41022	0.50682	0.56205	NaN	0.4425	0.42807	0.38204	0.47137	0.64455	0.44252	NaN	NaN	NaN	0.21032	NaN	NaN	S	3		+	0.999998	0.000458637	309.94	286.82	284.91	0.36389	452290000	314730000	137560000	27
1.0864	0.95272	0.61762	NaN	0.78034	0.64284	0.61072	0.7632	0.72857	NaN	0.64677	1.1144	1.1226	0.61092	0.43824	0.33326	0.26407	NaN	1.0377	0.75971	0.65021	0.62573	0.80413	0.8855	0.88001	0.77568	0.76753	0.87017	0.90508	0.78585	0.86204	0.63489	0.58601	NaN	NaN	NaN	S	3		+	1	5.99925e-06	278.36	237.64	278.36	-0.069472	430880000	254660000	176220000	31
1.0318	0.77595	0.97416	1.4638	2.3667	2.2817	2.4466	4.4472	4.2849	4.0898	3.571	7.1069	4.4551	5.1779	2.9452	2.1106	1.7854	1.1038	0.9889	0.77389	0.56815	1.5014	3.2389	3.6443	3.8068	4.0415	4.7988	5.7303	8.0664	6.223	6.9229	5.0318	4.5935	2.8675	2.4045	1.9944	S	3		+	0.999996	5.03289e-07	345.3	295.96	298.1	-0.053323	9276100000	2514400000	6761700000	34
NaN	NaN	NaN	NaN	NaN	NaN	NaN	NaN	NaN	NaN	NaN	0.27175	NaN	NaN	NaN	NaN	NaN	NaN	NaN	NaN	NaN	NaN	NaN	NaN	NaN	NaN	NaN	NaN	NaN	NaN	NaN	NaN	NaN	NaN	NaN	NaN	S	2		+	0.636806	0.00106816	107.11	74.254	53.21	0.57761	22278000	16925000	5353400	35
1.0366	0.89867	NaN	0.63934	0.74629	0.77365	0.7678	0.84623	0.91468	0.67633	0.6646	0.93106	0.23451	0.7994	0.5746	0.26707	0.51475	0.49344	NaN	NaN	NaN	NaN	NaN	0.70936	0.86554	0.69053	0.75757	0.89113	0.91361	0.74225	0.82409	0.71143	0.67869	0.63142	0.26921	0.50231	S	3		+	0.999998	1.29048e-05	302.2	261.52	268.93	0.040248	484990000	298290000	186700000	37
1.015	0.54473	0.45626	0.36737	0.39337	0.36765	0.28849	0.39832	0.35197	0.14351	0.22982	0.27293	NaN	0.27753	0.23162	0.25724	0.38362	0.34627	0.90697	0.65072	0.34833	0.39315	0.4224	0.38224	0.30927	0.26357	0.24065	0.28054	0.27844	0.24199	0.18877	NaN	NaN	0.27839	0.26426	0.2704	S	3		+	1	3.44506e-08	349.81	324.48	349.81	0.46023	1635700000	1115700000	519980000	39
0.98318	0.78893	0.6392	0.69173	0.79676	0.74802	0.80303	0.9383	0.88369	0.83211	0.67074	0.89879	0.76107	0.68863	0.70402	0.74938	0.70284	0.52071	1.0119	0.75822	0.97705	0.77335	0.74455	0.75173	0.77758	0.76252	0.71886	0.73814	0.93126	0.94731	0.62244	0.7327	0.73657	0.58712	0.60127	0.60785	S	4		+	1	1.86507e-05	224.43	165.16	174.19	-0.0788	4223700000	2347600000	1876100000	274
NaN	NaN	NaN	NaN	NaN	NaN	NaN	NaN	NaN	NaN	NaN	NaN	NaN	NaN	NaN	NaN	NaN	NaN	NaN	NaN	NaN	NaN	NaN	NaN	NaN	NaN	NaN	NaN	NaN	NaN	NaN	NaN	NaN	NaN	NaN	NaN	S	2		+	0.689798	5.00915e-05	99.378	70.301	99.378	0.27786	3240500	3240500	0	243
NaN	NaN	NaN	NaN	NaN	NaN	NaN	NaN	NaN	NaN	NaN	NaN	NaN	NaN	NaN	NaN	NaN	NaN	NaN	NaN	NaN	NaN	NaN	NaN	NaN	NaN	NaN	NaN	NaN	NaN	NaN	NaN	NaN	NaN	NaN	NaN	S	3		+	0.796399	0.000282692	118.48	76.938	118.48	0.085792	2492700	2492700	0	247
NaN	NaN	NaN	NaN	NaN	1.2509	NaN	0.84882	0.84811	1.2259	0.94074	NaN	1.2367	NaN	NaN	NaN	NaN	NaN	NaN	NaN	NaN	NaN	NaN	1.0191	0.9107	1.1563	1.3668	1.0176	1.7466	1.1854	0.90755	0.94732	0.77959	0.57753	0.94231	1.3412	S	3		+	1	0.00100117	128.57	72.586	123.11	0.055629	91757000	45799000	45959000	330
1.7972	NaN	NaN	0.79199	0.77624	NaN	0.72358	NaN	NaN	0.46315	0.49993	NaN	0.952	0.6835	0.43249	NaN	0.46008	NaN	NaN	0.68325	1.7832	0.70879	NaN	0.65986	NaN	NaN	NaN	NaN	NaN	NaN	NaN	NaN	NaN	NaN	NaN	NaN	S	4		+	0.999978	9.74263e-05	122.46	90.688	110.15	-0.10394	385260000	250040000	135220000	404
0.97186	0.90079	0.71287	0.70882	0.47629	0.59928	0.54778	0.66852	0.61509	0.37747	0.38606	0.46392	0.41829	0.40499	0.25655	0.29016	0.21231	0.23493	1.066	0.7852	0.87031	0.7377	0.5648	0.49546	0.54805	0.6405	0.63361	0.52403	0.5136	0.43841	0.30003	0.37031	0.26969	0.23399	0.23569	0.20548	S	3		+	1	6.96105e-06	305.6	224.7	232.84	-0.17228	16701000000	10343000000	6358100000	410
0.94573	0.68073	0.66476	0.62456	0.6981	0.62745	0.59651	0.76068	0.66558	0.5336	0.35456	0.53914	0.56017	0.58811	0.52362	0.58371	0.54462	0.37804	1.1437	0.66476	0.9312	0.64083	0.71933	0.49908	0.80237	0.53151	0.60019	0.6086	0.61894	0.59746	0.4296	0.43075	0.45303	0.49912	0.47525	0.41955	S	4		+	0.999997	1.15251e-05	162.37	138.94	110.15	-0.42459	4565400000	2702600000	1862800000	400
0.98704	0.79872	0.85219	0.8143	1.0002	0.7387	NaN	1.0738	0.87374	0.52306	0.46774	0.60037	0.73938	0.80997	0.73959	0.66964	0.58998	0.57098	0.89757	0.73397	0.6626	0.89195	0.66752	0.678	0.73965	0.85739	0.65114	0.84918	0.84279	0.61352	0.7502	0.6175	0.84213	0.75055	0.62297	0.65289	S	2		+	0.999907	3.25347e-08	130.19	104.21	130.19	0.40967	538120000	304030000	234090000	475
NaN	NaN	NaN	NaN	NaN	NaN	NaN	NaN	NaN	NaN	NaN	NaN	NaN	NaN	NaN	NaN	NaN	NaN	NaN	NaN	NaN	NaN	NaN	0.51629	NaN	0.36154	0.48801	0.47534	0.8302	0.67827	0.50977	0.50162	0.44677	NaN	0.30521	NaN	S	2		+	0.851925	3.44999e-05	109.95	54.914	80.746	0.048359	57134000	38733000	18401000	477
1.2225	NaN	0.67107	0.74256	NaN	0.54149	NaN	0.76047	0.55344	0.43496	0.48264	NaN	0.45055	0.39634	0.34087	0.31779	0.32139	0.2955	NaN	NaN	NaN	NaN	NaN	0.51629	NaN	NaN	NaN	NaN	NaN	NaN	NaN	NaN	NaN	NaN	NaN	NaN	S	2		+	0.860009	8.27662e-05	102.33	47.845	102.33	-0.099166	201450000	135250000	66204000	478
0.88099	0.73035	0.68066	0.92694	0.59328	0.80222	0.4621	1.0188	0.68994	0.81064	0.51161	0.65054	NaN	0.82531	0.76432	0.71744	0.57431	0.76715	NaN	NaN	NaN	NaN	0.72368	0.52694	0.56499	0.63686	0.54128	0.53869	0.8279	0.64935	0.71785	0.62693	0.65953	0.47229	0.58923	0.58692	S	2		+	1	3.78096e-40	198.95	129.98	165.58	1.3195	1805600000	1056800000	748820000	258
1.1101	0.70113	1.1222	1.7765	2.9247	3.7148	3.8395	4.9255	5.1161	5.2838	3.8145	3.8415	4.4232	2.4783	2.5279	1.8161	0.60059	0.68819	1.1995	NaN	1.2347	2.0291	2.5066	NaN	6.321	5.8269	6.1467	8.6428	7.6319	4.7486	2.7368	3.7767	3.0104	1.4114	1.7999	0.80416	S	3		+	0.999977	0.000135616	240.37	169.21	209.8	-0.091334	1667800000	483780000	1184000000	13
NaN	NaN	NaN	NaN	NaN	NaN	NaN	NaN	NaN	NaN	NaN	NaN	NaN	NaN	NaN	NaN	NaN	NaN	NaN	NaN	NaN	NaN	NaN	NaN	NaN	NaN	NaN	NaN	NaN	NaN	NaN	NaN	NaN	NaN	NaN	NaN	S	3		+	0.28048	0.000133344	47.464	32.39	47.464	0.59841	0	0	0	425
NaN	NaN	NaN	NaN	NaN	NaN	NaN	NaN	NaN	NaN	NaN	NaN	NaN	NaN	NaN	NaN	NaN	NaN	NaN	NaN	NaN	NaN	NaN	NaN	NaN	NaN	NaN	NaN	NaN	NaN	NaN	NaN	NaN	NaN	NaN	NaN	S	3		+	0.418069	4.08936e-05	58.058	30.387	58.058	0.5625	0	0	0	432
NaN	NaN	NaN	NaN	NaN	NaN	NaN	NaN	NaN	NaN	NaN	NaN	NaN	NaN	NaN	NaN	NaN	NaN	NaN	NaN	NaN	NaN	NaN	NaN	NaN	NaN	NaN	NaN	NaN	NaN	NaN	NaN	NaN	NaN	NaN	NaN	S	3		+	0.418588	0.000280076	43.036	22.966	43.036	0.69438	0	0	0	436
NaN	NaN	NaN	NaN	NaN	NaN	NaN	NaN	NaN	NaN	NaN	NaN	NaN	NaN	NaN	NaN	NaN	NaN	NaN	NaN	NaN	NaN	0.64374	0.59021	0.26269	0.66244	0.73169	0.76484	0.9517	0.77119	0.70242	0.74806	0.7138	0.47266	0.67637	0.60182	S	2		+	1	0.000268462	96.866	13.335	96.866	-0.082603	57785000	35341000	22444000	291
0.94463	0.74927	0.59991	NaN	NaN	NaN	NaN	NaN	NaN	NaN	0.44405	NaN	NaN	NaN	NaN	NaN	NaN	NaN	NaN	0.46622	NaN	NaN	0.62774	0.63937	0.42243	NaN	0.33056	0.44284	NaN	NaN	NaN	NaN	0.22335	NaN	NaN	NaN	S	3		+	0.999972	8.40326e-07	94.313	58.762	77.505	0.17525	312580000	189570000	123000000	71
NaN	NaN	0.7006	NaN	0.59721	NaN	NaN	NaN	NaN	NaN	NaN	NaN	NaN	NaN	NaN	NaN	NaN	NaN	NaN	NaN	NaN	NaN	NaN	NaN	NaN	NaN	NaN	NaN	NaN	NaN	NaN	NaN	NaN	NaN	NaN	NaN	S	3		+	0.809826	0.00176186	61.087	49.862	57.41	0.75939	281030000	195890000	85142000	36
NaN	NaN	NaN	NaN	NaN	NaN	NaN	NaN	NaN	NaN	NaN	NaN	NaN	NaN	NaN	NaN	NaN	NaN	NaN	NaN	NaN	NaN	NaN	NaN	NaN	NaN	NaN	NaN	NaN	NaN	NaN	NaN	NaN	NaN	NaN	NaN	S	4		+	0.448044	0.00142293	108.69	90.371	108.69	-0.12834	0	0	0	37
0.96139	0.77312	0.62508	0.58425	0.54044	0.55319	NaN	0.4578	0.47029	0.33116	0.31909	NaN	0.23295	NaN	NaN	0.29211	0.26028	0.32995	1.0936	0.96777	1.0282	0.67455	0.52743	0.59345	0.49998	0.32674	NaN	0.28483	0.30983	0.28712	NaN	NaN	NaN	0.20584	0.19877	0.21582	S	4		+	0.988644	5.99134e-09	195.55	178	147.91	-0.33457	2765100000	1877900000	887130000	38
NaN	NaN	0.53049	NaN	0.39206	0.21811	NaN	NaN	NaN	NaN	NaN	NaN	NaN	NaN	NaN	NaN	NaN	NaN	1.437	0.74105	NaN	NaN	NaN	NaN	NaN	NaN	NaN	NaN	NaN	NaN	NaN	NaN	NaN	NaN	NaN	NaN	S	4		+	0.999957	0.000418866	129.75	99.27	116.92	-0.13018	65465000	54052000	11413000	45
NaN	NaN	NaN	NaN	NaN	NaN	NaN	NaN	NaN	NaN	NaN	NaN	NaN	NaN	NaN	NaN	NaN	NaN	NaN	NaN	NaN	NaN	NaN	NaN	NaN	NaN	NaN	NaN	NaN	NaN	NaN	NaN	NaN	NaN	NaN	NaN	S	3		+	1	0.000105845	112.41	71.735	112.41	0.13783	0	0	0	2
NaN	NaN	NaN	NaN	NaN	NaN	NaN	NaN	NaN	NaN	NaN	NaN	NaN	NaN	NaN	NaN	NaN	NaN	NaN	NaN	NaN	NaN	NaN	NaN	NaN	NaN	NaN	NaN	NaN	NaN	NaN	NaN	NaN	NaN	NaN	NaN	S	2		+	0.999939	0.000263247	98.227	98.227	82.663	0.2193	0	0	0	6
NaN	NaN	NaN	NaN	NaN	NaN	NaN	NaN	NaN	NaN	NaN	NaN	NaN	NaN	NaN	NaN	NaN	NaN	NaN	NaN	NaN	NaN	NaN	NaN	NaN	NaN	NaN	NaN	NaN	NaN	NaN	NaN	NaN	NaN	NaN	NaN	S	2		+	0.999961	1.53386e-23	198.61	173.78	98.227	0.18749	0	0	0	7
NaN	NaN	NaN	NaN	NaN	NaN	NaN	NaN	NaN	NaN	NaN	NaN	NaN	NaN	NaN	NaN	NaN	NaN	NaN	NaN	NaN	NaN	NaN	NaN	NaN	NaN	NaN	NaN	NaN	NaN	NaN	NaN	NaN	NaN	NaN	NaN	S	3		+	0.499642	0.00200831	93.598	63.606	93.598	0.183	0	0	0	135
1.0834	0.75666	0.82341	0.80356	0.75226	0.83256	0.66463	1.1099	0.97632	0.83957	0.87662	0.76337	0.8615	0.99487	0.77549	0.83981	0.74943	0.76896	1.0905	0.80706	0.66643	0.69931	0.76177	NaN	1.1169	0.87121	0.74796	0.60929	0.90029	0.66066	0.93966	0.93172	0.78633	0.75244	0.94102	1.0467	S	2		+	1	5.68422e-11	219.72	173.65	152.94	-0.30173	3309600000	1770700000	1538900000	138
NaN	NaN	NaN	NaN	NaN	NaN	NaN	NaN	NaN	NaN	NaN	NaN	NaN	NaN	NaN	NaN	NaN	NaN	NaN	NaN	NaN	NaN	NaN	NaN	NaN	NaN	NaN	NaN	NaN	NaN	NaN	NaN	NaN	NaN	NaN	NaN	S	3		+	0.396819	0.00291316	50.493	30.824	50.493	-0.22902	0	0	0	316
NaN	NaN	NaN	NaN	NaN	NaN	NaN	NaN	NaN	NaN	NaN	NaN	NaN	NaN	NaN	NaN	NaN	NaN	NaN	NaN	NaN	NaN	NaN	NaN	NaN	NaN	NaN	NaN	NaN	NaN	NaN	NaN	NaN	NaN	NaN	NaN	S	3		+	0.595257	0.00123916	70.391	52.035	70.391	-0.13423	9126100	9126100	0	320
0.95052	1.1278	0.57175	NaN	0.90426	0.98317	0.84888	NaN	1.0077	1.2705	1.1253	0.79866	NaN	1.0629	0.76353	0.74859	NaN	0.5861	NaN	NaN	NaN	NaN	NaN	NaN	1.2923	0.96218	NaN	0.98798	NaN	1.2318	0.70476	1.0834	0.6021	NaN	0.71598	NaN	S	3		+	0.963061	6.03281e-06	93.388	67.902	80.477	0.21289	349240000	180530000	168710000	323
NaN	NaN	NaN	NaN	NaN	NaN	NaN	NaN	NaN	NaN	NaN	NaN	NaN	NaN	NaN	NaN	NaN	NaN	NaN	NaN	NaN	NaN	NaN	0.76223	NaN	0.60762	0.63832	1.2392	NaN	NaN	NaN	NaN	NaN	NaN	NaN	NaN	S	3		+	0.833986	0.00310528	51.232	21.157	51.232	-0.27244	27666000	17456000	10209000	324
NaN	NaN	1.6149	NaN	NaN	NaN	NaN	NaN	NaN	NaN	NaN	NaN	NaN	NaN	NaN	NaN	NaN	NaN	NaN	NaN	NaN	NaN	NaN	0.76223	NaN	0.60762	0.63832	1.2392	NaN	NaN	NaN	NaN	NaN	NaN	NaN	NaN	S	3		+	0.920462	0.00136548	54.985	31.35	51.232	-0.27244	36513000	18533000	17979000	325
0.82594	0.84318	0.88513	0.8295	0.96668	1.1025	0.9922	1.205	1.2479	1.0596	1.0242	1.1875	1.12	1.3626	1.1157	1.169	1.0305	0.85911	1.042	0.99895	1.1752	0.91571	1.097	1.1302	1.188	1.0071	1.063	1.0196	1.1498	1.3079	1.3328	1.1986	1.1268	1.2161	1.1309	1.1507	S	3		+	1	0.000300077	278.62	239.81	203.2	-0.11313	3200400000	1526900000	1673500000	32
1.0269	0.86063	NaN	0.75788	0.81172	0.80418	0.75755	0.86488	0.72712	NaN	NaN	NaN	NaN	NaN	NaN	0.28899	0.15746	NaN	1.0756	0.94407	0.87872	NaN	0.79801	NaN	NaN	NaN	NaN	0.57969	NaN	NaN	NaN	NaN	NaN	NaN	NaN	NaN	S	3		+	0.974284	6.80678e-06	81.799	59.173	66.122	-0.095621	1599400000	1074300000	525050000	396
NaN	NaN	NaN	NaN	NaN	NaN	NaN	NaN	NaN	NaN	NaN	NaN	NaN	NaN	NaN	NaN	NaN	NaN	NaN	NaN	NaN	NaN	NaN	NaN	NaN	0.58834	NaN	NaN	NaN	NaN	NaN	NaN	NaN	NaN	NaN	NaN	S	3		+	0.562025	0.00134547	63.869	43.698	56.488	-0.62282	86860000	65250000	21610000	398
NaN	NaN	NaN	NaN	NaN	NaN	NaN	NaN	NaN	NaN	NaN	NaN	NaN	NaN	NaN	NaN	NaN	NaN	NaN	NaN	NaN	NaN	NaN	NaN	NaN	NaN	NaN	NaN	NaN	NaN	NaN	NaN	NaN	NaN	NaN	NaN	S	3			1	7.0203e-08	280.94	46.136	249.69	-0.43792	179360000	105120000	74231000	2054
0.90548	1.087	NaN	0.97859	1.2624	NaN	1.1119	1.2515	1.2719	1.0548	NaN	NaN	1.3834	NaN	1.2165	NaN	NaN	NaN	NaN	NaN	1.9664	0.92323	0.7806	NaN	NaN	NaN	NaN	NaN	NaN	NaN	NaN	NaN	NaN	NaN	NaN	1.2359	S	3			0.972984	2.06904e-07	68.948	50.944	68.948	0.17028	10341000000	4886800000	5454400000	2029
0.78364	NaN	NaN	NaN	NaN	NaN	NaN	NaN	NaN	NaN	NaN	NaN	NaN	NaN	NaN	NaN	NaN	NaN	NaN	NaN	NaN	NaN	0.40698	0.45727	0.51932	NaN	NaN	NaN	NaN	0.58442	0.60226	NaN	NaN	0.73675	0.69888	NaN	S	3			0.945501	0.00135144	103.13	74.323	64.701	-2.1847	63420000	38483000	24936000	65
1.1882	NaN	NaN	NaN	NaN	1.0339	0.89438	NaN	NaN	NaN	NaN	NaN	NaN	NaN	NaN	NaN	0.88942	0.91104	NaN	NaN	NaN	NaN	NaN	NaN	NaN	NaN	NaN	NaN	NaN	NaN	NaN	NaN	NaN	NaN	NaN	NaN	S	4			0.987355	0.00577177	48.773	36.954	48.773	0.13338	235320000	120050000	115270000	53
1.1882	NaN	NaN	NaN	NaN	1.0339	0.89438	NaN	NaN	NaN	NaN	NaN	NaN	NaN	NaN	NaN	0.88942	0.91104	NaN	NaN	NaN	NaN	NaN	NaN	NaN	NaN	NaN	NaN	NaN	NaN	NaN	NaN	NaN	NaN	NaN	NaN	S	4			0.972387	0.00577177	48.773	36.954	48.773	0.13338	235320000	120050000	115270000	57
1.1882	NaN	NaN	NaN	NaN	1.0339	0.89438	NaN	NaN	NaN	NaN	NaN	NaN	NaN	NaN	NaN	0.88942	0.91104	NaN	NaN	NaN	NaN	NaN	NaN	NaN	NaN	NaN	NaN	NaN	NaN	NaN	NaN	NaN	NaN	NaN	NaN	S	4			0.949098	0.00577177	48.773	36.954	48.773	0.13338	235320000	120050000	115270000	61
1.14	0.80595	0.78534	NaN	NaN	NaN	NaN	NaN	NaN	NaN	NaN	NaN	NaN	NaN	NaN	NaN	NaN	NaN	NaN	NaN	NaN	NaN	NaN	1.0897	1.0282	0.86784	0.8233	0.89685	0.98997	1.5034	NaN	NaN	NaN	NaN	NaN	NaN	S	3			0.998183	1.27013e-17	118.68	118.68	70.71	-0.087274	104990000	59687000	45304000	140
0.99406	0.94302	NaN	0.85859	0.82659	1.0562	NaN	NaN	0.58862	NaN	NaN	0.59729	NaN	NaN	NaN	NaN	NaN	NaN	NaN	NaN	NaN	NaN	NaN	NaN	NaN	NaN	NaN	NaN	NaN	NaN	NaN	NaN	NaN	NaN	NaN	NaN	S	4			0.975732	0.000196555	50.534	31.534	50.534	0.11625	71780000	38982000	32798000	74
0.99406	0.94302	NaN	0.85859	0.82659	1.0562	NaN	NaN	0.58862	NaN	NaN	0.59729	NaN	NaN	NaN	NaN	NaN	NaN	NaN	NaN	NaN	NaN	NaN	NaN	NaN	NaN	NaN	NaN	NaN	NaN	NaN	NaN	NaN	NaN	NaN	NaN	S	4			0.843215	0.000196555	52.069	38.244	50.534	0.11625	75986000	43188000	32798000	78
NaN	NaN	NaN	NaN	NaN	NaN	NaN	NaN	NaN	NaN	NaN	NaN	NaN	NaN	NaN	NaN	NaN	NaN	NaN	NaN	NaN	NaN	NaN	NaN	NaN	NaN	NaN	NaN	NaN	NaN	NaN	NaN	NaN	NaN	NaN	NaN	S	4			0.799299	0.000391389	52.069	38.244	52.069	0.010047	4206300	4206300	0	80
NaN	NaN	NaN	NaN	NaN	NaN	NaN	NaN	NaN	NaN	NaN	NaN	NaN	NaN	NaN	NaN	NaN	NaN	NaN	NaN	NaN	NaN	NaN	NaN	NaN	NaN	NaN	NaN	NaN	NaN	NaN	NaN	NaN	NaN	NaN	NaN	S	4			0.800174	0.000478128	57.347	42.273	57.347	0.48711	176410000	176410000	0	25
0.83502	NaN	NaN	0.73929	0.81474	0.88453	NaN	NaN	0.80696	0.59434	0.71686	NaN	NaN	NaN	NaN	NaN	NaN	NaN	0.95941	0.94634	0.90691	0.97541	1.0346	NaN	NaN	NaN	NaN	NaN	NaN	NaN	NaN	NaN	NaN	NaN	NaN	NaN	S	3			0.999954	0.000168621	205.56	155.41	204.03	-0.055533	58711000	33151000	25560000	38
0.89442	1.0222	0.63099	NaN	1.0206	NaN	1.0153	NaN	0.6131	0.67989	0.60898	NaN	NaN	NaN	NaN	NaN	NaN	NaN	NaN	NaN	NaN	NaN	NaN	NaN	NaN	NaN	NaN	NaN	0.46309	NaN	NaN	NaN	NaN	NaN	NaN	NaN	S	3			0.999979	0.00024792	203.93	171.61	182.92	0.24121	31624000	16233000	15391000	41
0.79387	NaN	NaN	NaN	NaN	NaN	NaN	NaN	NaN	NaN	NaN	NaN	NaN	NaN	NaN	NaN	NaN	NaN	NaN	NaN	NaN	NaN	NaN	NaN	NaN	NaN	NaN	NaN	NaN	NaN	NaN	NaN	NaN	NaN	NaN	NaN	S	3			1	0.000177794	152.67	113.11	152.67	-0.41464	16534000	10220000	6313900	118
1.0227	0.6127	0.58868	0.65016	0.54564	0.5403	0.40079	0.51002	0.36882	0.23087	0.1856	0.03498	NaN	NaN	NaN	NaN	0.018213	NaN	1.0049	0.63008	0.51913	0.52025	0.54051	0.46754	0.44011	0.31848	0.25231	0.22065	0.21326	0.059725	0.031347	NaN	NaN	0.026149	NaN	NaN	S	3			0.999546	1.95849e-35	178.07	156.82	140.49	-0.026677	18288000000	13197000000	5091600000	130
NaN	NaN	NaN	NaN	NaN	NaN	NaN	NaN	NaN	NaN	NaN	NaN	NaN	NaN	NaN	NaN	NaN	NaN	NaN	NaN	NaN	NaN	0.50466	0.50322	NaN	NaN	NaN	0.23712	NaN	NaN	NaN	NaN	NaN	NaN	NaN	NaN	S	3			0.810219	1.68345e-06	129.29	102.59	69.612	-0.2061	660490000	446690000	213800000	133
0.99275	0.64	0.58799	0.71245	0.65774	0.59991	0.52245	0.66632	0.57258	0.4046	0.32741	0.10992	0.042647	0.036283	0.025949	0.022783	0.018278	NaN	1.0374	0.61324	0.54435	0.54836	0.57642	0.49646	0.48855	0.42086	0.35557	0.36937	0.38778	0.12139	0.069936	0.038153	0.026224	NaN	0.022801	NaN	S	2			0.999994	1.12055e-07	128.35	128.35	103.11	0.033234	3803600000	2521300000	1282400000	90
0.96431	0.58527	0.60653	0.5482	NaN	0.6218	0.48679	0.7349	0.64199	0.52599	0.51183	0.53235	0.64266	0.68447	0.61759	0.55829	0.57204	0.5231	NaN	0.57398	0.54066	0.5332	0.54012	0.47858	0.513	0.493	0.5259	0.54558	0.63351	0.52182	0.61212	0.5181	0.51596	0.51913	0.59915	NaN	S	2			0.99978	2.81856e-05	142	142	135.86	-0.038139	2374000000	1395600000	978420000	408
NaN	NaN	NaN	NaN	0.56809	NaN	NaN	NaN	NaN	NaN	NaN	NaN	NaN	NaN	NaN	NaN	NaN	NaN	0.92855	NaN	NaN	NaN	NaN	NaN	NaN	NaN	NaN	NaN	NaN	NaN	NaN	NaN	NaN	NaN	NaN	0.50272	S	2			0.971602	0.000730746	134.57	134.57	134.57	0.20906	189600000	105980000	83618000	410
0.93901	0.64974	0.70059	0.60427	0.67504	0.78011	0.61702	0.86069	0.77044	0.53273	0.50253	0.54176	0.55019	0.56271	0.50793	0.50778	0.46197	0.42064	1.0183	0.70786	0.67021	0.59	0.63768	0.66655	0.59661	0.5756	0.49008	0.47286	0.65823	0.42123	0.55	0.49204	0.45771	0.46714	0.46343	0.47175	S	3			1	6.39545e-44	298.1	257.13	234.36	0.022897	6893400000	4099800000	2793600000	110
1.0201	NaN	0.70328	0.69488	0.81305	0.817	0.59166	0.88887	0.84218	0.46447	0.59592	0.72833	0.80208	0.7865	0.77449	NaN	0.67352	0.69693	1.0088	0.90978	0.79521	0.68802	0.75341	0.79061	0.65903	0.634	0.68213	0.59753	0.75242	0.5794	0.75771	0.65186	0.61019	0.67107	0.61727	0.60959	S	3			1	8.11697e-17	120.33	99.046	83.115	-0.16964	1547100000	873020000	674050000	44
1.0201	NaN	0.70328	0.69488	0.81305	0.817	0.59166	0.88887	0.84218	0.46447	0.59592	0.72833	0.80208	0.7865	0.77449	NaN	0.67352	0.69693	1.0088	0.90978	0.79521	0.68802	0.75341	0.79061	0.65903	0.634	0.68213	0.59753	0.75242	0.5794	0.75771	0.65186	0.61019	0.67107	0.61727	0.60959	S	3			1	8.11697e-17	120.33	99.046	83.115	-0.16964	1547100000	873020000	674050000	47
1.0104	0.71261	0.72764	0.63999	0.58997	0.70923	0.47898	0.88799	0.81496	0.37491	0.64988	0.81433	0.69109	0.80289	0.71616	0.51852	0.6259	0.49568	0.92128	0.69735	0.46856	0.6745	0.72696	0.65855	0.48454	0.44685	0.53997	0.44177	0.75653	0.69653	0.72715	0.62985	0.64931	0.70366	0.59718	0.74935	S	3			1	1.73895e-54	255.91	188.5	255.91	-0.86829	2903200000	1666400000	1236800000	580
NaN	0.82308	NaN	NaN	NaN	NaN	NaN	NaN	NaN	NaN	NaN	NaN	NaN	NaN	NaN	NaN	NaN	NaN	1.0863	NaN	NaN	NaN	NaN	NaN	0.92547	NaN	NaN	0.49729	NaN	NaN	NaN	NaN	NaN	NaN	NaN	NaN	S	3			0.836495	3.2771e-07	103.41	79.979	81.878	0.19661	116960000	82816000	34139000	8
1.0866	NaN	NaN	0.88565	0.70274	0.78991	0.67943	0.72069	0.66574	0.52326	NaN	NaN	NaN	NaN	NaN	NaN	NaN	NaN	NaN	NaN	NaN	0.79893	0.70525	0.60625	0.64955	0.67398	NaN	NaN	NaN	NaN	NaN	NaN	NaN	NaN	NaN	NaN	S	2			0.99048	2.88802e-17	151.35	120.76	87.155	-0.34249	240710000	143590000	97122000	12
1.0172	NaN	NaN	NaN	NaN	NaN	NaN	NaN	NaN	NaN	NaN	NaN	NaN	NaN	NaN	NaN	NaN	NaN	NaN	NaN	NaN	NaN	NaN	NaN	NaN	NaN	NaN	NaN	NaN	NaN	NaN	NaN	NaN	NaN	NaN	NaN	S	3			0.972899	0.000152226	66.777	41.079	56.708	0.17047	78888000	39909000	38979000	17
1.1014	0.82308	1.1431	0.81461	1.0282	1.4132	0.51211	1.0222	0.64689	1.5222	2.2081	3.6149	NaN	NaN	NaN	NaN	1.681	1.7841	1.0399	NaN	0.92445	0.75232	0.80175	0.81038	1.1024	0.66941	NaN	1.3673	0.49579	2.5424	NaN	2.6548	2.4856	1.6899	2.2207	1.7661	S	2			0.853024	1.50176e-16	142.32	91.536	98.657	0.43793	984230000	554370000	429860000	24
1.1014	0.82308	1.1431	NaN	1.0282	0.84184	0.51211	1.0222	1.7983	1.5222	2.2081	0.16599	3.9094	3.3328	2.7081	2.0185	1.681	1.7841	1.0399	0.87008	0.92445	0.83006	0.7458	0.81038	1.1024	1.6163	1.7944	1.3673	0.49579	NaN	NaN	2.6548	2.4856	1.6899	2.2207	1.7661	S	2			0.944578	1.42371e-34	179.43	129.19	179.43	-0.20452	1030200000	594000000	436180000	25
NaN	NaN	NaN	NaN	NaN	NaN	NaN	NaN	NaN	NaN	NaN	NaN	NaN	NaN	NaN	NaN	NaN	NaN	NaN	NaN	NaN	0.59116	NaN	NaN	NaN	NaN	NaN	NaN	NaN	NaN	NaN	NaN	NaN	NaN	NaN	NaN	S	2			0.999404	0.00478905	59.918	36.26	59.918	-0.57613	2079900	1252000	827920	864
0.90985	1.6097	NaN	2.5582	1.3449	0.1156	0.1688	3.3197	0.90743	0.078657	0.13494	NaN	1.5397	1.5812	1.1269	NaN	1.4631	2.932	NaN	3.1624	0.31848	0.42394	3.8976	NaN	NaN	2.3169	0.37643	NaN	3.6897	NaN	1.9222	0.65422	1.3649	4.6974	NaN	NaN	S	3			1	7.74164e-05	76.068	53.442	54.072	-0.034326	886590000	358480000	528110000	147
1.0366	NaN	NaN	NaN	NaN	NaN	NaN	NaN	NaN	NaN	NaN	NaN	NaN	NaN	NaN	NaN	NaN	0.99612	NaN	NaN	NaN	NaN	NaN	0.93805	NaN	NaN	NaN	NaN	NaN	NaN	NaN	0.71812	NaN	NaN	NaN	NaN	S	3			0.499999	1.80294e-15	138.25	116.56	97.94	0.55726	117330000	62739000	54591000	15
0.92896	0.80217	0.72013	0.73521	0.96998	0.89477	0.95985	0.92453	1.0848	1.3166	0.81326	0.95307	0.92214	0.96421	0.81912	0.99926	0.84225	0.78935	1.1846	1.0535	1.5425	0.93256	1.0056	1.0673	1.0335	0.85191	0.91651	0.77634	0.89221	0.77499	0.88681	0.87394	0.6966	0.83596	0.79786	0.7599	S	3			0.973103	1.80294e-15	138.25	116.56	96.016	0.13679	14921000000	7708500000	7212600000	17
NaN	NaN	NaN	NaN	NaN	NaN	NaN	NaN	NaN	NaN	NaN	NaN	NaN	NaN	NaN	NaN	NaN	NaN	NaN	NaN	NaN	NaN	NaN	NaN	1.0255	NaN	NaN	NaN	NaN	NaN	NaN	NaN	NaN	NaN	NaN	NaN	S	4			0.929239	5.25674e-05	75.956	61.27	50.285	0.23698	79001000	39263000	39738000	24
1.2693	0.84078	NaN	NaN	NaN	NaN	NaN	NaN	NaN	0.79083	NaN	NaN	NaN	1.0551	NaN	NaN	NaN	NaN	NaN	NaN	NaN	NaN	NaN	NaN	NaN	NaN	NaN	NaN	NaN	1.5168	NaN	NaN	NaN	NaN	NaN	NaN	S	3			0.773099	1.07385e-05	87.748	66.154	67.097	1.0009	1194100000	628710000	565360000	25
1.0104	0.73717	0.70223	0.65869	0.74791	0.72021	0.59499	0.87971	0.77863	0.6223	0.64382	0.68252	0.74019	0.81507	0.71413	0.70613	0.73222	0.64282	1.0424	0.65854	0.60022	0.63426	0.59491	0.62523	0.63854	0.59961	0.65171	0.66133	0.74106	0.55346	0.74464	0.62462	0.60866	0.64643	0.71015	0.68831	S	2			1	4.00978e-08	135.91	106.27	132.97	0.034908	1131600000	644020000	487610000	276
NaN	NaN	NaN	NaN	NaN	NaN	NaN	NaN	NaN	NaN	NaN	NaN	NaN	NaN	NaN	NaN	NaN	NaN	NaN	NaN	NaN	NaN	NaN	NaN	NaN	NaN	NaN	NaN	NaN	NaN	NaN	NaN	NaN	NaN	NaN	NaN	S	3			0.486104	4.25077e-05	62.781	48.442	62.781	-0.49317	0	0	0	180
0.95271	0.84747	0.69492	0.8202	0.81881	0.81695	0.6785	1.0125	0.86449	0.68368	0.69164	0.72165	0.70596	0.77607	0.6265	0.60727	0.52504	0.41485	1.0235	0.7338	NaN	0.64778	0.65914	0.7565	0.64013	0.72258	NaN	0.6882	0.80931	0.74099	0.80456	0.64753	0.65001	0.56721	0.55923	0.44533	S	3			0.998975	1.44872e-12	111.97	93.286	111.97	-0.027414	1895700000	1065800000	829870000	183
1.0496	0.70282	NaN	0.48294	0.67852	0.63033	0.46692	0.60882	NaN	NaN	0.27945	NaN	NaN	NaN	NaN	NaN	NaN	0.053414	0.91663	0.74955	0.50171	0.60807	0.56246	0.59597	NaN	0.62211	NaN	0.345	0.54788	NaN	NaN	NaN	NaN	NaN	NaN	NaN	S	2			0.999741	1.33625e-07	140.96	117.78	139	-0.8833	358410000	255480000	102940000	182
1.2151	0.59121	0.84416	1.6239	1.7795	1.9155	1.3847	2.0509	0.95565	0.96782	1.1716	2.051	2.3135	0.55207	1.3462	1.7822	1.6075	0.65585	0.98761	1.6987	1.3933	0.68856	1.2899	0.48681	0.66262	0.61121	0.88461	0.78118	0.8133	0.59387	0.46572	0.80508	0.73525	1.2824	0.94204	0.41024	S	2			0.999995	9.54833e-69	231.62	191.02	213.69	-0.089633	26458000000	15098000000	11361000000	181
NaN	NaN	NaN	NaN	NaN	NaN	0.68658	NaN	NaN	NaN	NaN	NaN	NaN	NaN	NaN	NaN	NaN	NaN	NaN	NaN	NaN	NaN	NaN	NaN	NaN	NaN	NaN	NaN	NaN	NaN	NaN	NaN	NaN	NaN	NaN	NaN	S	3			0.638671	6.61883e-09	124.82	99.237	124.82	0.083674	108550000	65615000	42932000	54
1.0194	0.8922	0.71448	0.80634	0.80433	0.8821	0.80763	1.0506	0.93395	1.3715	0.78444	0.85349	1.0931	0.98967	1.005	0.87874	0.96383	0.80211	1.1052	0.95118	0.67748	0.79526	0.85179	0.9624	0.91183	0.85021	0.88834	0.8564	1.1207	0.80425	1.0629	0.90805	0.92595	1.1751	0.89398	1.0272	S	3			0.999993	2.84326e-23	166.59	135.99	156.58	0.090514	5991800000	3187300000	2804500000	57
0.96581	NaN	NaN	NaN	NaN	NaN	NaN	NaN	NaN	NaN	NaN	NaN	NaN	NaN	NaN	NaN	NaN	NaN	1.083	0.13282	NaN	0.090441	NaN	NaN	NaN	NaN	NaN	NaN	NaN	NaN	NaN	NaN	NaN	NaN	NaN	NaN	S	3			1	1.20361e-10	225.55	172.95	128.57	-0.57344	1282400000	1045100000	237340000	666
NaN	NaN	NaN	NaN	NaN	NaN	NaN	NaN	NaN	NaN	NaN	NaN	NaN	NaN	NaN	NaN	NaN	NaN	NaN	NaN	NaN	NaN	NaN	NaN	NaN	NaN	NaN	NaN	NaN	NaN	NaN	NaN	NaN	NaN	NaN	NaN	S	2			0.565256	0.00156049	73.802	51.988	73.802	-0.44416	15369000	7357600	8011900	670
1.0691	NaN	NaN	0.15908	NaN	NaN	NaN	NaN	NaN	NaN	NaN	NaN	NaN	NaN	NaN	NaN	NaN	NaN	1.0554	NaN	NaN	NaN	NaN	NaN	NaN	NaN	NaN	NaN	NaN	NaN	NaN	NaN	NaN	NaN	NaN	NaN	S	3			0.999983	0.000661523	197.21	158.4	197.21	0.35793	92935000	67971000	24965000	671
0.8301	NaN	NaN	NaN	NaN	NaN	NaN	NaN	NaN	NaN	NaN	NaN	NaN	NaN	NaN	NaN	NaN	NaN	NaN	NaN	NaN	NaN	NaN	NaN	NaN	NaN	NaN	NaN	NaN	NaN	0.20231	NaN	NaN	NaN	NaN	NaN	S	2			0.770714	6.94133e-05	97.797	72.714	68.952	0.93507	45569000	35142000	10427000	789
1.0074	NaN	NaN	NaN	NaN	NaN	NaN	NaN	NaN	NaN	NaN	NaN	NaN	NaN	NaN	NaN	NaN	NaN	NaN	NaN	NaN	NaN	NaN	NaN	NaN	0.16572	NaN	NaN	NaN	NaN	NaN	NaN	0.24755	NaN	NaN	NaN	S	2			0.942898	0.00493786	74.657	47.318	62.055	-0.40312	40734000	32682000	8052000	773
1.0591	0.69796	0.70471	0.67732	0.73973	0.77279	0.61075	0.86935	0.75898	0.65874	0.65721	0.68844	0.72247	0.71345	0.64171	0.5958	0.54224	0.50643	1.1006	0.70076	0.64166	0.6704	0.69624	NaN	NaN	0.64052	0.65424	0.6438	0.74963	0.5821	0.72232	0.59031	0.56172	0.59211	0.58637	0.55855	S	2			1	1.57923e-07	127.3	106.27	44.612	0.075358	2964600000	1704500000	1260200000	315
NaN	0.76347	NaN	NaN	NaN	NaN	NaN	NaN	NaN	0.7465	NaN	NaN	NaN	NaN	NaN	NaN	NaN	NaN	NaN	NaN	NaN	NaN	NaN	NaN	NaN	NaN	NaN	NaN	0.95314	NaN	NaN	NaN	NaN	0.87935	NaN	NaN	S	3			0.639777	3.79974e-18	126.96	109.19	51.473	-0.10435	625050000	343840000	281210000	319
1.0584	NaN	0.69828	0.75322	NaN	0.8409	0.64611	0.86296	1.0516	NaN	0.72941	0.92256	0.88406	1.0026	NaN	0.83572	0.83076	0.82416	NaN	0.81721	NaN	0.82096	0.79096	NaN	0.87339	0.77718	NaN	0.78386	NaN	NaN	NaN	0.69546	NaN	0.78659	NaN	0.68326	S	3			0.893066	5.20746e-22	136.37	109.97	124.91	-0.12032	2710700000	1539400000	1171300000	320
NaN	NaN	NaN	NaN	NaN	NaN	NaN	NaN	NaN	NaN	NaN	NaN	NaN	NaN	0.94208	NaN	NaN	NaN	1.1782	NaN	NaN	NaN	NaN	NaN	NaN	NaN	NaN	NaN	NaN	NaN	NaN	NaN	NaN	NaN	NaN	NaN	S	3			0.916034	1.30351e-06	83.992	70.088	74.627	-0.089916	149470000	93121000	56349000	323
NaN	NaN	0.86477	0.85585	NaN	NaN	NaN	NaN	NaN	NaN	NaN	0.87729	0.69659	1.0266	NaN	NaN	NaN	0.69825	NaN	0.82975	0.58109	0.8548	0.96384	NaN	0.65792	NaN	NaN	NaN	0.80006	NaN	NaN	NaN	0.59058	0.69714	NaN	NaN	S	3			0.947964	3.74855e-06	82.294	58.425	74.876	0.21119	136680000	81799000	54885000	156
1.067	0.77144	1.0776	0.72916	0.73789	0.82115	0.73296	1.0535	0.88116	0.67114	0.76196	0.8285	0.78783	0.85149	0.74178	0.70027	0.67461	0.621	1.163	0.62491	1.4012	0.72197	0.75853	0.80165	0.74496	0.79977	0.7141	0.60635	0.85688	0.81346	0.65955	0.61198	0.56302	0.52377	0.64144	0.44988	S	2			1	5.9682e-22	156.87	116.97	74.173	0.090863	11340000000	6085800000	5254500000	258
1.2412	0.72193	0.65626	0.68531	0.76359	0.74913	0.58098	0.83445	0.65551	NaN	0.5174	0.33362	0.28584	0.1879	0.13074	NaN	NaN	NaN	NaN	NaN	NaN	0.69505	0.67278	NaN	NaN	NaN	NaN	0.76308	NaN	NaN	0.2509	0.23354	0.11209	NaN	NaN	0.1269	S	2			0.998251	5.26514e-05	106.82	63.401	82.663	-0.30679	316440000	217460000	98984000	211
NaN	NaN	NaN	NaN	NaN	NaN	NaN	NaN	NaN	NaN	NaN	NaN	NaN	NaN	NaN	NaN	NaN	NaN	NaN	NaN	NaN	NaN	NaN	NaN	NaN	NaN	NaN	NaN	NaN	NaN	NaN	NaN	NaN	NaN	NaN	NaN	S	3			1	0.00120133	218.34	156.24	218.34	-0.55103	19412000	19412000	0	302
0.89731	0.99942	0.88833	0.80634	0.93482	0.95074	1.024	1.0471	1.2966	0.85337	0.76483	1.1371	0.95795	1.0042	0.80782	1.2909	0.83061	1.0398	NaN	1.5547	1.8843	0.99783	0.94302	0.97841	1.0207	0.83484	0.98715	0.97145	1.0759	1.4772	0.94945	1.0523	0.83286	0.78945	0.9251	0.82507	S	3			1	1.37821e-21	139.75	139.75	133.17	0.12498	636750000	317480000	319270000	827
NaN	NaN	NaN	NaN	NaN	NaN	NaN	NaN	NaN	NaN	NaN	NaN	NaN	NaN	NaN	NaN	NaN	0.036496	NaN	NaN	0.62103	0.67076	NaN	NaN	NaN	0.22573	NaN	0.095825	0.09432	NaN	NaN	NaN	NaN	NaN	NaN	NaN	S	3			1	8.00487e-05	291.5	291.5	284.62	0.078238	227300000	199200000	28100000	74
1.018	0.72036	0.65441	0.62787	0.69073	0.66558	0.66019	0.85393	0.73329	0.63031	0.57148	0.51886	0.4466	0.40549	0.28849	0.24069	0.15674	0.13634	1.0492	0.72723	0.66096	0.63464	0.62581	0.57628	0.59598	0.56819	0.58876	0.59475	0.73456	0.49481	0.43448	0.36208	0.32373	0.23702	0.21117	0.16698	S	3			1	0.000807521	190.86	190.86	190.86	-0.23614	9419900000	5867900000	3552000000	616
NaN	NaN	NaN	NaN	NaN	NaN	NaN	NaN	NaN	NaN	NaN	NaN	NaN	NaN	NaN	NaN	NaN	NaN	NaN	NaN	NaN	NaN	NaN	NaN	NaN	NaN	NaN	NaN	NaN	NaN	NaN	NaN	NaN	NaN	NaN	NaN	S	4			0.513994	0.00261557	60.325	40.276	60.325	0.35351	4557300	0	4557300	1551
NaN	NaN	NaN	NaN	0.73883	NaN	0.61433	0.79365	0.69765	0.72633	NaN	0.64882	0.55869	0.70004	0.52552	NaN	0.44979	0.35363	0.98881	NaN	0.58628	0.69672	0.70518	NaN	0.6252	NaN	0.881	0.60391	NaN	NaN	NaN	NaN	NaN	NaN	NaN	NaN	S	2			0.998737	1.81731e-08	140.24	108.54	138.77	0.90346	156630000	100580000	56050000	1553
0.92069	NaN	0.39922	0.65317	0.79709	0.5851	0.3655	0.63222	NaN	0.53065	0.36811	0.35847	0.28545	0.33164	0.32543	NaN	NaN	NaN	0.88344	NaN	0.56397	NaN	0.64445	NaN	NaN	NaN	NaN	NaN	NaN	NaN	NaN	NaN	NaN	NaN	NaN	NaN	S	2			0.999988	5.25694e-07	124.47	91.152	100.22	0.08208	107680000	58339000	49339000	108
1.126	0.62162	0.62325	0.60081	0.66294	0.7671	NaN	NaN	0.73431	0.49102	0.63002	0.58024	NaN	0.68809	0.62443	NaN	NaN	0.42935	NaN	NaN	NaN	NaN	NaN	NaN	NaN	NaN	NaN	NaN	NaN	NaN	NaN	NaN	NaN	NaN	NaN	NaN	S	2			0.999835	0.0052807	69.03	23.662	56.414	0.063725	149210000	89474000	59739000	259
NaN	NaN	NaN	NaN	NaN	NaN	NaN	NaN	NaN	NaN	NaN	NaN	NaN	NaN	NaN	NaN	NaN	NaN	NaN	NaN	NaN	NaN	NaN	NaN	NaN	NaN	NaN	NaN	NaN	NaN	NaN	NaN	NaN	NaN	NaN	NaN	S	3			0.992754	0.00297782	60.246	25.202	60.246	0.60306	217840000	106030000	111800000	258
NaN	NaN	NaN	NaN	NaN	NaN	NaN	NaN	NaN	NaN	NaN	NaN	NaN	NaN	NaN	NaN	NaN	NaN	NaN	NaN	NaN	NaN	NaN	NaN	NaN	NaN	NaN	NaN	NaN	NaN	NaN	NaN	NaN	NaN	NaN	NaN	S	3			0.999807	0.00297782	60.246	25.202	60.246	0.60306	217840000	106030000	111800000	266
0.78526	NaN	0.86284	NaN	NaN	NaN	NaN	NaN	NaN	NaN	NaN	NaN	NaN	NaN	NaN	NaN	NaN	NaN	NaN	NaN	NaN	NaN	NaN	NaN	NaN	NaN	NaN	NaN	NaN	NaN	NaN	NaN	NaN	NaN	NaN	NaN	S	4			0.838812	0.00239311	69.292	43.465	69.292	-0.29107	23922000	13162000	10759000	196
NaN	NaN	NaN	NaN	NaN	NaN	NaN	NaN	NaN	NaN	NaN	NaN	NaN	NaN	NaN	NaN	NaN	0.47522	NaN	NaN	NaN	NaN	NaN	NaN	NaN	NaN	NaN	NaN	NaN	NaN	NaN	NaN	NaN	NaN	NaN	NaN	S	3			0.822494	2.21229e-12	194.3	152.27	110.61	-0.20739	148130000	80908000	67217000	133
0.98216	0.67035	0.61659	0.53152	0.77971	0.79998	0.8112	0.72423	0.65103	0.85975	0.61173	0.60577	0.85126	1.3772	0.7591	1.2	0.52621	0.84281	0.93229	0.475	0.81759	0.57457	0.21674	0.36851	0.70492	0.62653	0.54695	0.89384	0.86128	0.8332	0.45222	0.87694	1.3605	1.2349	2.5602	0.62382	S	3			1	5.24377e-19	170.26	133.67	115.09	0.22894	3022400000	1804900000	1217600000	296
0.56845	0.67035	0.64942	0.77075	0.77971	0.69508	0.8112	0.7105	0.70284	0.85975	0.78755	0.99849	1.2139	0.93224	1.7119	1.3485	1.6146	1.8313	0.90347	0.96798	0.98257	0.62566	1.2001	0.59007	0.66603	0.50732	0.68351	0.9041	0.84679	0.94606	0.9002	0.87694	0.83714	0.61987	1.6534	1.6368	S	3			1	9.33102e-06	170.26	133.67	115.09	0.22894	2532000000	1512200000	1019800000	298
1.2127	0.71196	0.58543	0.6313	0.7358	0.86329	0.65248	1.0943	1.0496	0.71724	0.70359	0.36752	0.94678	0.84388	1.0066	1.1046	0.93432	0.93599	1.1151	0.76394	0.81759	0.64068	1.0301	0.90651	0.78824	0.75628	0.60327	0.80952	0.95482	0.63636	0.96796	0.77489	0.7051	1.0501	0.73743	0.72755	S	3			1	5.24377e-19	170.26	133.67	170.26	0.18272	3148000000	1896200000	1251800000	303
1.1221	0.92628	0.74134	0.77559	0.90949	0.9716	0.84305	1.0475	1.077	0.79752	0.79347	0.71154	0.6739	0.74912	0.55292	0.58842	0.57303	0.40375	1.2005	1.0289	1.0212	1.0189	0.97556	NaN	NaN	0.43798	NaN	NaN	NaN	NaN	NaN	NaN	NaN	NaN	NaN	NaN	S	3			1	0.00131871	108.77	90.871	82.01	0.089646	589140000	321740000	267390000	56
0.86032	0.82777	0.71363	0.62233	0.83006	0.63179	0.60809	0.65688	0.64074	0.82633	0.45629	0.49937	0.73319	0.39451	0.60229	0.6612	0.42579	0.54674	1.0028	0.47185	0.95256	0.4732	0.69607	0.73755	0.53159	0.75845	0.74963	0.55368	0.71605	0.75191	0.69209	0.65546	0.47412	0.49736	0.52033	0.70013	S	3			1	6.72366e-45	201.29	163.07	82.01	0.089646	4334300000	2448800000	1885500000	60
NaN	NaN	0.42421	NaN	NaN	NaN	NaN	NaN	0.62348	0.48745	0.62234	0.61056	0.61266	0.53306	0.45621	0.41918	0.44073	0.34257	1.0506	NaN	NaN	NaN	NaN	NaN	0.77008	NaN	NaN	0.58287	0.80557	0.61541	0.57904	0.40115	0.41185	0.5244	0.40831	0.58752	S	3			0.999178	0.000341151	237.21	155.76	225.32	-0.014625	221990000	125690000	96298000	687
NaN	NaN	NaN	NaN	NaN	NaN	NaN	NaN	0.62348	0.48745	0.62234	NaN	NaN	NaN	NaN	NaN	NaN	NaN	NaN	NaN	NaN	NaN	NaN	NaN	NaN	0.51246	0.60831	NaN	NaN	NaN	NaN	NaN	NaN	0.5244	0.40831	NaN	S	3			0.949457	0.000585051	204.52	146.93	204.52	-0.0097539	48203000	26734000	21469000	689
NaN	0.59015	NaN	NaN	0.71703	0.69402	0.57538	0.61118	0.71722	0.44533	NaN	NaN	NaN	NaN	NaN	NaN	NaN	NaN	NaN	NaN	NaN	NaN	NaN	NaN	NaN	NaN	NaN	NaN	NaN	NaN	NaN	NaN	NaN	NaN	NaN	NaN	S	3			0.999987	1.52219e-05	81.316	64.702	81.316	0.66524	54423000	35394000	19029000	857
NaN	NaN	NaN	NaN	NaN	NaN	NaN	NaN	NaN	NaN	NaN	NaN	NaN	NaN	NaN	NaN	NaN	NaN	NaN	NaN	NaN	NaN	NaN	NaN	NaN	NaN	NaN	NaN	NaN	NaN	NaN	NaN	NaN	NaN	NaN	NaN	S	3			0.386368	0.00022337	160.46	116.96	46.415	-0.046362	0	0	0	153
NaN	NaN	NaN	NaN	NaN	NaN	NaN	NaN	NaN	NaN	NaN	NaN	NaN	NaN	NaN	NaN	NaN	NaN	NaN	NaN	NaN	NaN	NaN	NaN	NaN	NaN	NaN	NaN	NaN	NaN	NaN	NaN	NaN	NaN	NaN	NaN	S	3			0.429786	0.00022337	160.46	116.96	99.603	-1.2189	0	0	0	154
1.2192	0.46662	1.0146	0.76122	0.75264	0.92289	0.49697	0.75233	0.73774	1.0269	0.74083	0.79614	0.83217	0.78524	0.87505	0.78458	0.69955	1.3607	1.1989	0.65237	0.66205	0.72071	0.67152	0.63871	NaN	0.50715	0.63179	0.67411	1.2786	0.69538	0.81186	0.69755	NaN	0.76543	0.75223	1.024	S	2			1	3.63055e-08	131.27	105.21	131.27	0.26118	2160900000	1174000000	986850000	36
1.1865	1.136	1.0377	NaN	1.0698	1.1864	0.90398	1.2418	1.1971	1.2403	0.9034	1.0178	1.033	1.0993	1.0346	NaN	0.52138	NaN	1.2395	1.4667	NaN	0.89731	0.89853	1.2828	1.0979	NaN	NaN	NaN	NaN	NaN	NaN	NaN	NaN	NaN	NaN	NaN	S	2			0.999766	8.3566e-27	183.25	153.39	140.04	-0.13019	161880000	82653000	79231000	62
NaN	NaN	NaN	NaN	NaN	NaN	NaN	NaN	NaN	NaN	NaN	NaN	NaN	NaN	NaN	NaN	NaN	NaN	NaN	NaN	NaN	NaN	NaN	NaN	NaN	NaN	NaN	NaN	NaN	NaN	NaN	NaN	NaN	NaN	NaN	NaN	S	3			1	0.00619278	50.202	30.947	45.511	-0.57643	7306100	0	7306100	139
NaN	NaN	NaN	NaN	NaN	NaN	NaN	NaN	NaN	NaN	NaN	NaN	NaN	NaN	NaN	NaN	NaN	NaN	NaN	NaN	NaN	NaN	NaN	NaN	NaN	NaN	NaN	NaN	NaN	NaN	NaN	NaN	NaN	NaN	NaN	NaN	S	4			0.999721	0.00161957	47.795	33.877	47.795	0.1539	4292100	0	4292100	242
0.71374	0.77773	0.64429	0.68367	0.68534	0.93098	0.88999	1.1708	0.98904	0.52894	0.73043	0.86341	1.0274	0.93053	0.68158	0.22123	0.86418	1.0032	0.97454	0.99614	0.61868	0.82033	0.59633	0.53708	0.78711	0.60161	0.54714	0.62963	0.94876	0.57702	0.50727	0.46945	0.32554	0.69608	0.23278	0.23215	S	3			1	1.34556e-25	232.37	197.72	160.46	0.33431	7838600000	4547900000	3290700000	519
1.0505	0.97276	0.68758	0.71712	0.89044	0.60213	0.70772	1.1605	0.97094	0.50912	0.85822	0.80628	0.92467	0.74499	0.91629	0.76916	0.85826	0.75758	0.74489	0.9195	0.62328	0.72791	0.80715	0.81199	0.80719	0.87196	0.74894	0.768	1.0566	0.74861	0.77521	0.80885	0.74742	0.75425	0.86131	0.93121	S	3			1	6.31221e-110	295.78	273.24	160.46	0.33431	21141000000	11577000000	9564000000	520
NaN	NaN	0.83964	0.32952	0.51074	1.1064	NaN	0.10008	1.046	0.16303	0.17245	NaN	NaN	NaN	NaN	NaN	NaN	0.015313	1.1981	0.8474	0.45232	0.45727	0.57464	NaN	NaN	NaN	NaN	NaN	NaN	NaN	NaN	NaN	NaN	NaN	NaN	NaN	S	3			1	5.03289e-07	380.65	308.78	153.41	0.19888	6053300000	4325300000	1728000000	554
NaN	NaN	NaN	NaN	0.84352	1.1064	NaN	1.5095	1.046	0.18087	NaN	NaN	NaN	NaN	NaN	NaN	NaN	NaN	NaN	NaN	NaN	NaN	NaN	NaN	NaN	NaN	NaN	NaN	NaN	NaN	NaN	NaN	NaN	NaN	NaN	NaN	S	3			1	0.000134251	232.78	181.31	153.41	0.19888	207430000	166820000	40610000	556
NaN	NaN	NaN	NaN	NaN	NaN	NaN	NaN	NaN	NaN	NaN	NaN	NaN	NaN	NaN	NaN	NaN	NaN	NaN	NaN	NaN	NaN	NaN	NaN	NaN	NaN	NaN	NaN	NaN	NaN	NaN	NaN	NaN	NaN	NaN	NaN	S	3			0.345571	5.86117e-06	95.988	79.972	95.988	-0.033296	0	0	0	500
0.90311	NaN	NaN	NaN	NaN	NaN	NaN	NaN	NaN	NaN	0.14978	NaN	NaN	0.080539	NaN	NaN	NaN	NaN	1.0694	0.75485	NaN	NaN	0.40968	NaN	NaN	NaN	NaN	NaN	NaN	NaN	NaN	NaN	NaN	NaN	NaN	NaN	S	3			0.86325	5.14719e-07	120.23	105.81	97.999	-0.34613	298160000	210290000	87873000	502
NaN	0.64345	0.55052	0.36993	0.40008	0.38752	0.23468	0.31023	NaN	NaN	NaN	NaN	0.074204	NaN	NaN	NaN	NaN	NaN	NaN	NaN	0.45444	0.39379	NaN	0.2758	NaN	0.15427	NaN	0.22651	0.25172	0.14864	NaN	NaN	NaN	NaN	NaN	NaN	S	3			0.941674	4.548e-06	110.25	82.217	54.56	-0.14532	521140000	428200000	92940000	504
1.0513	0.76917	NaN	0.62255	0.94435	NaN	NaN	1.0983	1.538	1.6508	1.6147	1.3432	NaN	1.1636	1.2395	1.0786	0.23185	NaN	0.87888	0.59943	1.5758	NaN	NaN	0.49549	1.2102	1.0277	1.456	1.0849	1.4176	1.3072	0.40427	1.0296	NaN	0.28679	0.80159	0.28477	S	3			0.935817	0.000167567	268.93	213.26	227.93	-0.3874	1551900000	740650000	811280000	537
0.9881	NaN	0.44048	0.345	NaN	NaN	NaN	NaN	0.15285	0.093974	0.070785	NaN	NaN	NaN	NaN	NaN	NaN	NaN	NaN	NaN	NaN	NaN	NaN	0.48366	NaN	NaN	NaN	NaN	0.22008	NaN	NaN	NaN	0.10045	NaN	NaN	NaN	S	3			0.999998	1.44161e-35	352.53	310.44	302.2	-1.5406	217660000	169070000	48591000	605
0.96448	0.6987	0.69971	0.59469	0.65498	0.73252	0.60453	0.60484	0.64687	0.44979	0.41356	0.39576	0.40196	0.3385	0.25594	0.22114	0.19957	0.17438	1.0716	0.78147	0.95181	0.67535	0.68033	0.59191	0.57217	0.56014	0.50844	0.44573	0.53504	0.38704	0.34625	0.25509	0.27067	0.23491	0.20586	0.18251	S	3			1	1.33278e-05	289.59	234.42	260.23	0.10544	2477500000	1551200000	926370000	594
NaN	NaN	NaN	NaN	NaN	NaN	NaN	NaN	NaN	NaN	NaN	NaN	NaN	NaN	NaN	NaN	NaN	NaN	NaN	NaN	NaN	NaN	NaN	NaN	NaN	NaN	NaN	NaN	NaN	NaN	NaN	NaN	NaN	NaN	NaN	NaN	S	4			0.798412	1.26919e-09	75.942	58.08	75.942	0.53263	3302000	3302000	0	23
NaN	NaN	NaN	NaN	NaN	NaN	NaN	NaN	NaN	NaN	NaN	NaN	NaN	NaN	NaN	NaN	NaN	NaN	NaN	NaN	NaN	NaN	NaN	NaN	NaN	NaN	NaN	NaN	NaN	NaN	NaN	NaN	NaN	NaN	NaN	NaN	S	4			0.371162	0.00381443	44.292	26.429	44.292	0.76073	0	0	0	24
0.9847	0.66228	0.54684	0.50689	0.52611	0.44817	0.3737	0.33304	0.26106	0.12881	NaN	NaN	NaN	NaN	NaN	NaN	NaN	NaN	1.1712	0.76256	0.74603	0.5674	0.4752	0.45113	0.3945	0.23128	NaN	0.11475	0.15617	NaN	NaN	NaN	NaN	NaN	NaN	NaN	S	3			1	5.96958e-05	273.38	198.17	261.98	-0.063803	471280000	342760000	128520000	90
1.2462	1.1415	NaN	0.96146	0.81895	0.90191	1.0066	1.2361	1.2699	0.92421	NaN	1.0482	NaN	NaN	1.0043	NaN	NaN	0.93209	NaN	NaN	1.4993	0.83616	NaN	0.96372	NaN	NaN	0.74691	0.93873	NaN	NaN	0.968	0.94721	NaN	0.79647	0.88261	NaN	S	4			0.869156	1.05732e-14	116.16	100.75	74.525	0.68015	2076300000	1007400000	1068800000	519
NaN	NaN	NaN	0.96954	NaN	NaN	NaN	NaN	NaN	NaN	NaN	NaN	NaN	NaN	NaN	NaN	NaN	NaN	1.1772	NaN	NaN	NaN	NaN	NaN	NaN	NaN	NaN	NaN	NaN	NaN	NaN	NaN	NaN	NaN	NaN	NaN	S	3			0.544815	1.49496e-09	94.669	80.43	64.422	-0.47356	100510000	48427000	52080000	520
0.95915	1.0905	1.0152	0.92806	0.98424	1.0993	1.126	0.81101	0.95154	1.482	0.70227	0.33365	0.54291	0.35927	0.48121	0.71503	NaN	0.44855	1.1118	0.81707	2.3327	1.0736	0.75413	0.85629	0.92709	0.94432	0.81766	0.63313	0.73048	NaN	0.27875	0.24436	NaN	NaN	NaN	0.11983	S	3			1	6.18772e-17	158.91	133.89	158.91	-0.21559	1005800000	561290000	444500000	60
NaN	NaN	NaN	1.2147	NaN	NaN	NaN	NaN	NaN	NaN	NaN	NaN	NaN	NaN	NaN	NaN	NaN	NaN	NaN	NaN	NaN	NaN	NaN	NaN	NaN	NaN	NaN	1.414	NaN	NaN	NaN	NaN	NaN	NaN	NaN	NaN	S	3			0.997304	0.000552027	218.34	187.77	218.34	-0.29292	24781000	10357000	14424000	311
NaN	1.405	1.2176	NaN	1.5418	1.4524	NaN	1.5099	NaN	1.4111	1.2806	NaN	NaN	0.91453	0.48518	0.41074	NaN	NaN	1.0903	NaN	2.6801	1.3314	1.6015	NaN	NaN	1.5812	NaN	1.414	NaN	2.3114	0.83766	0.90206	NaN	NaN	0.63279	0.49962	S	3			0.998858	0.000260205	282.09	222.72	228.49	-1.0998	321580000	142580000	178990000	312
1.4108	2.2641	2.4937	2.0116	2.9866	3.4209	3.0072	3.6481	4.8488	1.4737	1.7864	2.6945	3.3218	NaN	2.2656	4.7762	3.2804	3.8459	0.8394	3.3706	2.7414	3.3149	3.1324	3.0733	2.4044	2.4743	3.3351	2.2024	3.2883	3.0171	2.3465	1.4607	2.5912	3.5285	3.4966	3.6674	S	3			0.999993	1.78808e-05	297.83	204.49	265.67	0.20391	610120000	161720000	448400000	261
0.95955	0.59469	0.48804	0.74726	0.75808	0.68743	0.52522	0.95788	NaN	NaN	NaN	0.50083	0.75863	0.77657	NaN	0.46451	0.34163	0.49525	NaN	NaN	NaN	NaN	NaN	NaN	NaN	NaN	NaN	NaN	NaN	NaN	NaN	NaN	NaN	NaN	NaN	NaN	S	2			1	3.71326e-06	129.11	76.938	129.11	-0.77136	138960000	77030000	61927000	203
NaN	1.0975	0.72511	0.73807	0.97763	0.95468	0.75175	1.0485	NaN	NaN	NaN	NaN	NaN	NaN	NaN	NaN	NaN	NaN	1.5313	0.98811	0.92151	0.90522	0.82239	0.56863	0.62135	0.47522	NaN	0.44751	0.49956	NaN	NaN	NaN	NaN	NaN	NaN	NaN	S	3			0.982095	0.000452239	106.76	67.762	74.89	-0.2145	170000000	102880000	67123000	764
NaN	1.0975	0.72511	0.73807	0.97763	0.95468	0.75175	1.0485	NaN	NaN	NaN	NaN	NaN	NaN	NaN	NaN	NaN	NaN	1.5313	0.98811	0.92151	0.90522	0.82239	0.56863	0.62135	0.47522	NaN	0.44751	NaN	NaN	NaN	NaN	NaN	NaN	NaN	NaN	S	3			0.999773	0.000452239	106.76	67.762	98.676	-0.19271	164560000	99667000	64895000	772
NaN	NaN	NaN	NaN	NaN	NaN	NaN	NaN	NaN	NaN	NaN	NaN	NaN	NaN	NaN	NaN	NaN	NaN	NaN	NaN	NaN	NaN	NaN	NaN	NaN	NaN	NaN	NaN	NaN	NaN	NaN	NaN	NaN	NaN	NaN	NaN	S	2			0.78712	0.00560062	77.221	40.277	66.809	0.54962	21415000	1889300	19525000	381
NaN	NaN	NaN	NaN	NaN	NaN	NaN	NaN	NaN	NaN	NaN	NaN	NaN	NaN	NaN	NaN	NaN	NaN	NaN	NaN	NaN	NaN	NaN	NaN	NaN	NaN	NaN	NaN	NaN	NaN	1.0554	NaN	NaN	NaN	0.63353	NaN	S	2			0.824531	0.00323503	83.54	62.226	83.54	-0.70456	23336000	5751000	17585000	382
NaN	NaN	NaN	NaN	NaN	NaN	NaN	NaN	NaN	NaN	NaN	NaN	NaN	NaN	NaN	NaN	NaN	NaN	NaN	NaN	NaN	NaN	NaN	NaN	NaN	NaN	NaN	NaN	NaN	NaN	NaN	NaN	NaN	NaN	NaN	NaN	S	4			0.699878	1.80156e-06	64.594	49.284	53.033	1.6088	20555000	20555000	0	24
NaN	NaN	NaN	NaN	NaN	NaN	NaN	NaN	NaN	NaN	NaN	NaN	NaN	NaN	NaN	NaN	NaN	NaN	NaN	NaN	NaN	NaN	NaN	NaN	NaN	NaN	NaN	NaN	NaN	NaN	NaN	NaN	NaN	NaN	NaN	NaN	S	4			0.247423	7.71627e-07	70.57	54.105	70.57	0.95127	0	0	0	26
NaN	NaN	NaN	NaN	NaN	NaN	NaN	NaN	NaN	NaN	NaN	NaN	NaN	NaN	NaN	NaN	NaN	NaN	NaN	NaN	NaN	NaN	NaN	NaN	NaN	NaN	NaN	NaN	NaN	NaN	NaN	NaN	NaN	NaN	NaN	NaN	S	4			0.3179	2.12703e-06	62.706	44.179	62.706	1.1308	0	0	0	28
NaN	NaN	NaN	NaN	NaN	NaN	NaN	NaN	NaN	NaN	NaN	NaN	NaN	NaN	NaN	NaN	NaN	NaN	NaN	NaN	NaN	NaN	NaN	NaN	NaN	NaN	NaN	NaN	NaN	NaN	NaN	NaN	NaN	NaN	NaN	NaN	S	4			0.221282	0.000287434	51.096	37.557	51.096	0.19973	0	0	0	32
NaN	NaN	NaN	NaN	NaN	NaN	NaN	NaN	NaN	NaN	NaN	NaN	NaN	NaN	NaN	NaN	NaN	NaN	NaN	NaN	NaN	NaN	NaN	NaN	NaN	NaN	NaN	NaN	NaN	NaN	NaN	NaN	NaN	NaN	NaN	NaN	S	4			0.370249	0.000287434	51.096	37.557	46.968	1.1584	0	0	0	33
NaN	NaN	NaN	NaN	NaN	NaN	NaN	NaN	NaN	NaN	NaN	NaN	NaN	NaN	NaN	NaN	NaN	NaN	NaN	NaN	NaN	NaN	NaN	NaN	NaN	NaN	NaN	NaN	NaN	NaN	NaN	NaN	NaN	NaN	NaN	NaN	S	3			0.460607	0.00622426	91.845	51.966	91.845	0.17985	0	0	0	420
1.2009	0.61831	0.73961	0.72635	0.76114	0.6769	0.61901	0.87209	0.65204	0.35504	0.38417	0.41003	0.15852	NaN	NaN	NaN	NaN	NaN	NaN	NaN	NaN	NaN	NaN	NaN	NaN	NaN	NaN	NaN	NaN	NaN	NaN	NaN	NaN	NaN	NaN	NaN	S	3			0.874007	0.00194656	145.52	97.84	134.04	-0.44425	84815000	52922000	31892000	421
1.0741	0.86251	0.82219	0.69211	0.84272	NaN	NaN	NaN	1.1128	0.68138	0.86354	0.95643	NaN	0.92135	NaN	0.9291	NaN	0.8236	NaN	1.0737	NaN	0.87472	0.8203	NaN	NaN	NaN	0.81721	NaN	NaN	NaN	NaN	0.88668	NaN	NaN	NaN	1.0197	S	3			0.973645	9.55072e-08	95.122	65.966	83.436	-0.53873	391420000	205480000	185940000	374
NaN	NaN	NaN	NaN	NaN	NaN	NaN	NaN	NaN	NaN	NaN	NaN	0.99896	NaN	NaN	NaN	NaN	NaN	NaN	NaN	NaN	NaN	NaN	NaN	NaN	NaN	NaN	NaN	NaN	NaN	NaN	NaN	NaN	NaN	1.0221	NaN	S	3			0.855068	0.000337857	58.5	27.84	57.829	-0.4781	17296000	8550600	8745500	376
0.92218	0.70228	0.69238	0.6346	0.74358	0.82335	0.42223	0.83808	0.77818	0.22568	0.46415	0.32608	0.10415	0.14625	0.11686	0.10736	0.077206	0.069169	1.0469	0.6529	0.34454	0.6856	0.66306	0.56618	0.52402	0.51995	0.51044	0.48044	0.55789	0.20794	0.25165	0.21277	0.14909	0.15933	0.11059	0.12262	S	2			0.999993	4.49599e-13	156	156	126.63	-0.43131	2637100000	1794900000	842200000	368
NaN	NaN	NaN	NaN	NaN	NaN	NaN	NaN	NaN	NaN	NaN	NaN	NaN	NaN	NaN	NaN	NaN	NaN	NaN	NaN	NaN	NaN	NaN	0.65878	NaN	NaN	NaN	NaN	NaN	NaN	NaN	NaN	NaN	NaN	NaN	NaN	S	3			0.770953	8.09382e-05	85.423	38.334	85.423	-0.070553	171030000	100590000	70435000	181
NaN	NaN	NaN	0.66458	NaN	NaN	NaN	NaN	NaN	NaN	NaN	NaN	NaN	NaN	NaN	NaN	NaN	NaN	NaN	NaN	NaN	NaN	NaN	NaN	NaN	NaN	NaN	NaN	NaN	NaN	NaN	NaN	NaN	NaN	NaN	NaN	S	3			0.612517	8.09382e-05	73.448	48.943	61.959	0.027721	14547000	6793000	7754400	182
1.0128	0.63723	0.72519	0.68838	NaN	0.74783	NaN	0.8104	0.83691	0.72214	0.60747	0.72673	0.78859	0.92414	0.74944	0.6512	0.66132	0.46514	NaN	0.54076	NaN	0.5589	0.54781	0.63268	0.68468	0.70118	0.63884	0.51498	NaN	0.61442	0.85686	0.66571	0.72085	0.47638	NaN	0.72866	S	2			0.999998	7.04559e-11	132.33	112.93	118.9	-0.13948	2221100000	1289600000	931480000	188
NaN	NaN	NaN	NaN	NaN	NaN	NaN	NaN	NaN	NaN	NaN	NaN	NaN	NaN	NaN	NaN	NaN	NaN	NaN	NaN	NaN	NaN	NaN	NaN	NaN	NaN	NaN	NaN	NaN	NaN	NaN	NaN	NaN	NaN	NaN	NaN	S	2			0.456144	4.70397e-05	109.1	63.889	87.669	0.11769	0	0	0	325
NaN	NaN	NaN	NaN	NaN	0.69147	NaN	NaN	0.81325	NaN	NaN	NaN	NaN	NaN	NaN	0.66431	NaN	NaN	NaN	NaN	NaN	NaN	NaN	NaN	NaN	0.6477	NaN	NaN	NaN	NaN	NaN	NaN	NaN	NaN	NaN	NaN	S	2			0.726057	1.23771e-05	124.68	40.543	114.06	-0.05302	630460000	411340000	219120000	326
NaN	NaN	0.67966	NaN	0.74326	NaN	0.56245	0.86557	NaN	0.63128	0.60421	0.68989	0.73798	0.72946	0.67881	NaN	NaN	NaN	1.0383	0.69248	NaN	0.66075	0.65505	0.64981	0.66814	NaN	0.65598	0.64509	NaN	NaN	NaN	0.62576	NaN	NaN	0.68051	NaN	S	2			0.99094	2.0672e-10	148.41	80.238	148.41	0.039399	3070100000	1825800000	1244400000	327
NaN	NaN	NaN	NaN	NaN	NaN	NaN	NaN	NaN	NaN	NaN	NaN	NaN	NaN	NaN	NaN	NaN	NaN	NaN	NaN	NaN	NaN	NaN	NaN	NaN	NaN	NaN	NaN	NaN	0.58963	NaN	0.43701	0.51263	0.70575	NaN	NaN	S	3			0.982593	0.000432913	98.407	71.402	98.407	-2.0764	28820000	21174000	7646000	278
1.1131	0.73088	0.73007	0.64527	0.73071	0.70289	0.60552	0.88169	0.83859	0.69154	0.67285	0.73011	0.69354	0.78385	0.757	0.72358	0.60719	0.62289	1.0633	0.68977	0.62463	0.64876	0.65854	1.0162	NaN	0.66689	0.68441	0.74168	0.76166	0.59541	0.77621	0.67919	0.64133	0.67102	0.68768	0.63668	S	2			0.998498	3.59086e-47	196.44	144.07	167.35	-0.17925	5079200000	2958700000	2120500000	415
NaN	NaN	NaN	NaN	NaN	NaN	NaN	NaN	NaN	NaN	NaN	NaN	NaN	NaN	NaN	NaN	NaN	NaN	NaN	NaN	NaN	NaN	NaN	NaN	NaN	NaN	NaN	NaN	NaN	NaN	NaN	NaN	NaN	NaN	NaN	NaN	S	2			0.52369	0.00158885	74.505	34.988	74.505	-0.52331	16306000	7572200	8733900	470
1.0443	0.69965	0.69231	0.66838	0.77379	0.59165	0.48235	0.532	0.40088	0.2492	0.13316	0.046539	0.034811	0.037365	0.033381	0.038495	0.040078	0.04218	0.97398	0.82307	0.7333	0.6409	0.66312	0.66644	0.46752	0.3718	0.2391	0.2227	0.20944	0.072878	0.069308	0.058244	0.059147	0.057577	0.067605	0.067691	S	3			0.999982	0.000196931	174.87	116.63	174.87	-0.44248	4182900000	3015300000	1167600000	480
NaN	NaN	NaN	NaN	NaN	NaN	NaN	0.72062	NaN	0.30342	0.3226	NaN	NaN	NaN	NaN	NaN	NaN	NaN	NaN	NaN	NaN	NaN	NaN	NaN	NaN	NaN	NaN	NaN	NaN	NaN	NaN	NaN	NaN	NaN	NaN	NaN	S	2			0.702151	0.00580564	69.92	17.022	69.92	-0.23841	13337000	8799900	4537500	1443
0.87639	NaN	NaN	NaN	NaN	NaN	NaN	0.76075	NaN	NaN	0.9681	NaN	0.60671	0.88046	NaN	0.72598	0.66909	NaN	NaN	NaN	NaN	NaN	NaN	NaN	NaN	NaN	NaN	NaN	NaN	1.6832	0.96283	0.79469	0.53292	0.8474	NaN	NaN	S	3			1	0.00334736	170.26	106.58	142.12	-0.47705	42235000	23388000	18847000	1993
1.0633	0.75537	0.71263	0.6905	0.68828	0.68741	0.56071	0.73975	0.69374	0.51698	0.4796	0.2636	0.14152	0.12695	0.10669	0.11851	0.08808	0.074782	0.97612	0.73709	0.63009	0.60892	0.67606	0.69514	0.58522	0.51453	0.4921	0.58423	0.62659	0.27778	0.18329	0.14645	0.13922	0.11396	0.12485	0.11398	S	2			0.999999	5.58585e-41	199.05	138.42	174.59	0.17688	764810000	509480000	255340000	440
1.2037	NaN	NaN	0.73333	NaN	NaN	NaN	NaN	NaN	NaN	NaN	NaN	0.70614	0.79182	NaN	NaN	0.65884	NaN	NaN	NaN	NaN	0.78832	0.84389	NaN	NaN	NaN	NaN	NaN	NaN	NaN	0.72134	0.82825	NaN	NaN	NaN	NaN	S	3			0.934685	0.000740799	110.32	88.542	79.341	-0.17563	79045000	42560000	36485000	10
NaN	0.61701	0.80849	0.73333	0.68866	0.90336	0.64759	NaN	1.0837	0.70115	0.72082	0.69676	NaN	0.79182	0.79492	0.73344	0.65884	0.68805	0.96064	0.8649	0.75434	0.78832	0.84389	0.67712	0.67985	0.69411	0.71217	0.7206	1.0054	0.76377	NaN	0.82825	0.68293	0.70308	0.76561	0.67983	S	3			0.990078	0.000718228	110.32	88.542	94.639	0.62287	222460000	120460000	102000000	13
1.0946	0.61643	NaN	0.49213	0.50373	NaN	NaN	NaN	1.024	NaN	NaN	0.77725	NaN	NaN	NaN	NaN	NaN	NaN	NaN	NaN	NaN	NaN	NaN	NaN	NaN	NaN	NaN	NaN	NaN	NaN	NaN	NaN	NaN	NaN	NaN	NaN	S	3			0.995198	0.00287071	169.76	141.71	167.93	1.3159	75175000	42203000	32972000	45
NaN	NaN	NaN	NaN	NaN	NaN	NaN	NaN	NaN	NaN	NaN	NaN	NaN	NaN	NaN	NaN	NaN	NaN	NaN	NaN	NaN	1.6228	NaN	NaN	NaN	NaN	NaN	NaN	NaN	1.4636	NaN	NaN	NaN	NaN	NaN	NaN	S	3			0.672609	2.61345e-08	75.436	45.435	71.688	0.33557	17945000	6304800	11640000	785
1.4277	NaN	NaN	NaN	1.1887	1.1629	NaN	1.3633	1.3592	NaN	1.305	NaN	NaN	NaN	NaN	NaN	NaN	NaN	NaN	NaN	NaN	NaN	NaN	NaN	NaN	NaN	NaN	NaN	NaN	NaN	NaN	NaN	NaN	NaN	NaN	NaN	S	3			0.973205	0.00563932	65.416	43.769	65.416	-0.36338	201810000	118040000	83770000	426
0.97052	0.95928	0.88694	0.88765	0.82539	1.0673	NaN	0.8953	0.99805	1.6611	0.96581	1.232	1.6647	1.44	1.6443	1.5471	0.9783	1.067	1.0807	0.61076	1.2337	0.82812	0.56181	0.77392	0.74554	0.8443	0.95628	0.76406	1.1032	1.0916	1.3207	1.2991	1.2531	1.0155	1.1621	0.94446	S	2			0.999917	1.95325e-23	179.46	150.11	139.74	-0.56617	918230000	454560000	463670000	431
0.89104	0.71127	0.6896	0.57145	0.55479	0.63153	0.3772	0.43951	0.24444	0.19371	0.11443	NaN	NaN	NaN	NaN	NaN	NaN	NaN	1.0121	0.65822	0.73048	0.67069	NaN	0.39721	0.41504	0.26928	0.13261	0.20655	NaN	NaN	NaN	NaN	NaN	NaN	NaN	NaN	S	3			0.999976	1.01355e-05	164.92	127.26	156.83	-0.031563	734850000	515060000	219790000	640
1.0458	NaN	NaN	NaN	NaN	NaN	NaN	NaN	NaN	NaN	NaN	NaN	NaN	NaN	NaN	NaN	NaN	NaN	NaN	NaN	NaN	0.61338	0.62519	NaN	NaN	NaN	NaN	NaN	NaN	NaN	NaN	NaN	NaN	NaN	NaN	NaN	S	2			0.971677	2.95056e-05	120.79	93.525	107.18	-0.057809	59229000	32438000	26791000	455
1.1217	0.69317	0.69466	0.6285	0.65799	0.61476	0.46471	0.50976	0.37322	0.1875	NaN	NaN	NaN	NaN	NaN	NaN	NaN	NaN	1.0781	0.77745	0.5776	NaN	NaN	0.57922	0.52853	NaN	NaN	NaN	NaN	NaN	NaN	NaN	NaN	NaN	NaN	NaN	S	2			0.999944	2.75317e-15	156.08	122.71	120.56	-0.059791	443430000	326610000	116820000	458
NaN	NaN	NaN	NaN	NaN	NaN	NaN	NaN	NaN	NaN	NaN	NaN	NaN	NaN	NaN	NaN	NaN	NaN	NaN	NaN	NaN	NaN	NaN	NaN	NaN	NaN	NaN	NaN	NaN	NaN	NaN	NaN	NaN	NaN	NaN	NaN	S	4			0.3321	0.00362294	63.681	42.322	63.681	0.72406	0	0	0	362
NaN	NaN	NaN	NaN	NaN	NaN	NaN	NaN	NaN	NaN	NaN	NaN	NaN	NaN	NaN	NaN	NaN	NaN	NaN	NaN	NaN	NaN	NaN	NaN	NaN	NaN	NaN	NaN	NaN	NaN	NaN	NaN	NaN	NaN	NaN	NaN	S	4			0.801285	0.000187086	74.89	57.966	71.545	-0.42039	20270000	20270000	0	363
NaN	NaN	NaN	NaN	NaN	NaN	NaN	NaN	NaN	NaN	NaN	NaN	NaN	NaN	NaN	NaN	NaN	NaN	NaN	1.1859	NaN	0.75877	0.78847	NaN	NaN	NaN	NaN	NaN	NaN	NaN	NaN	NaN	NaN	NaN	NaN	NaN	S	3			0.999224	2.9656e-05	106.76	106.76	102.39	0.33161	217500000	171470000	46030000	367
NaN	NaN	NaN	NaN	0.81527	NaN	NaN	0.86349	0.87262	0.83504	0.70092	NaN	0.21621	0.2348	NaN	0.21369	0.16414	NaN	NaN	NaN	NaN	NaN	NaN	NaN	NaN	NaN	NaN	NaN	NaN	NaN	NaN	NaN	NaN	NaN	NaN	NaN	S	2			0.683756	0.00157514	81.346	40.579	81.346	-0.17307	186550000	113760000	72787000	1672
0.90209	0.8012	1.0626	0.43637	0.50693	0.70205	0.64944	0.94766	0.86825	0.46825	0.55253	0.38771	NaN	NaN	0.24089	0.21743	0.18285	0.16881	NaN	0.7259	0.73846	0.84928	NaN	NaN	NaN	1.0032	NaN	0.76768	0.78333	NaN	NaN	NaN	NaN	NaN	NaN	NaN	S	3			1	0.00104204	158.47	104.49	152.54	-0.17755	355970000	238030000	117940000	1677
NaN	NaN	NaN	NaN	NaN	NaN	NaN	NaN	NaN	NaN	NaN	NaN	NaN	NaN	NaN	NaN	NaN	NaN	NaN	NaN	NaN	NaN	NaN	NaN	NaN	NaN	NaN	NaN	NaN	NaN	NaN	NaN	NaN	NaN	NaN	NaN	S	3			0.333165	0.000100914	54.167	41.671	54.167	-0.0047839	0	0	0	1384
NaN	NaN	NaN	NaN	NaN	NaN	NaN	NaN	NaN	NaN	NaN	NaN	NaN	NaN	NaN	NaN	NaN	NaN	NaN	NaN	NaN	NaN	NaN	NaN	NaN	NaN	NaN	NaN	NaN	NaN	NaN	NaN	NaN	NaN	NaN	NaN	S	3			0.333165	0.000100914	54.167	41.671	54.167	-0.0047839	0	0	0	1385
NaN	NaN	NaN	NaN	NaN	NaN	NaN	NaN	NaN	NaN	NaN	NaN	NaN	NaN	NaN	NaN	NaN	NaN	NaN	NaN	NaN	NaN	NaN	NaN	NaN	NaN	NaN	NaN	NaN	NaN	NaN	NaN	NaN	NaN	NaN	NaN	S	3			0.333165	0.000100914	54.167	41.671	54.167	-0.0047839	0	0	0	1387
NaN	NaN	NaN	NaN	0.5802	NaN	NaN	NaN	NaN	NaN	NaN	NaN	NaN	NaN	NaN	NaN	NaN	NaN	NaN	NaN	NaN	NaN	NaN	NaN	NaN	NaN	NaN	NaN	NaN	NaN	NaN	NaN	NaN	NaN	NaN	NaN	S	2			0.565794	0.000394827	92.247	51.083	92.247	-0.17492	23119000	14431000	8687800	89
1.1064	0.67747	0.66531	0.64169	NaN	0.59674	0.37047	0.45285	0.30603	0.13939	0.088707	NaN	NaN	NaN	NaN	NaN	NaN	NaN	1.0258	0.67071	0.49305	0.61466	0.56065	0.45171	0.37834	0.23354	0.12695	0.15779	NaN	NaN	NaN	NaN	NaN	NaN	NaN	NaN	S	2			0.999884	5.28645e-08	133.32	83.873	129.34	-0.24763	896840000	642310000	254530000	90
0.94284	0.88605	0.77843	0.86972	NaN	0.97566	0.85903	NaN	NaN	NaN	NaN	NaN	0.91206	1.0412	0.83751	0.88437	0.80736	NaN	NaN	NaN	NaN	0.83503	0.87785	0.82947	NaN	NaN	0.86643	NaN	NaN	0.843	NaN	0.89537	0.84041	0.73778	NaN	NaN	S	3			0.999988	0.0004131	62.792	39.499	62.792	-0.38615	2082800000	1112700000	970190000	1040
NaN	NaN	NaN	NaN	NaN	NaN	NaN	NaN	NaN	NaN	NaN	NaN	NaN	NaN	NaN	NaN	NaN	NaN	NaN	NaN	NaN	NaN	NaN	NaN	NaN	NaN	NaN	NaN	NaN	NaN	NaN	NaN	NaN	NaN	NaN	NaN	S	3			0.356938	0.000431867	60.272	35.865	60.272	-0.032332	0	0	0	114
NaN	NaN	NaN	NaN	NaN	NaN	NaN	NaN	NaN	NaN	NaN	NaN	NaN	NaN	NaN	NaN	NaN	NaN	NaN	NaN	NaN	NaN	NaN	NaN	NaN	NaN	NaN	NaN	NaN	NaN	NaN	NaN	NaN	NaN	NaN	NaN	S	4			0.420353	0.000309776	111.73	79.16	111.73	-0.13608	0	0	0	34
0.82351	0.62235	0.72289	0.64653	1.0466	0.68485	1.0542	0.96557	1.1537	0.72947	0.83538	0.72214	0.48899	0.59948	0.66378	NaN	NaN	NaN	0.89394	1.1606	1.3653	NaN	1.2791	0.85805	0.90875	1.1856	0.6963	0.83944	0.80801	0.85087	0.70022	0.5021	0.64592	NaN	0.2753	0.28376	S	3			0.999918	5.20092e-05	231.62	182.54	208.4	2.0379	551670000	306500000	245170000	35
NaN	NaN	NaN	NaN	NaN	NaN	NaN	NaN	NaN	NaN	NaN	NaN	NaN	NaN	NaN	NaN	NaN	NaN	1.2614	0.70193	0.67266	0.69966	0.69134	0.64429	NaN	0.52031	0.44548	0.4671	NaN	NaN	NaN	NaN	NaN	NaN	NaN	NaN	S	2			1	0.00568892	132.03	86.947	72.662	0.16212	170650000	140140000	30513000	326
NaN	NaN	NaN	NaN	NaN	NaN	NaN	NaN	NaN	NaN	NaN	NaN	NaN	NaN	NaN	NaN	NaN	NaN	1.2614	0.70193	0.67266	0.69966	0.69134	0.64429	NaN	0.52031	0.44548	0.4671	NaN	NaN	NaN	NaN	NaN	NaN	NaN	NaN	S	2			1	0.00568892	132.03	86.947	72.662	0.16212	170650000	140140000	30513000	330
NaN	NaN	NaN	NaN	NaN	NaN	NaN	NaN	NaN	NaN	NaN	NaN	NaN	NaN	NaN	NaN	NaN	NaN	NaN	NaN	NaN	NaN	NaN	NaN	NaN	NaN	NaN	NaN	NaN	NaN	NaN	NaN	NaN	NaN	NaN	NaN	S	3			1	1.04176e-06	336.71	270.04	60.55	0.30752	9771600	7674600	2097000	1798
0.95703	0.43274	0.56866	0.41512	0.55888	NaN	NaN	NaN	0.55011	0.33848	NaN	NaN	NaN	NaN	NaN	NaN	NaN	NaN	1.1238	NaN	NaN	NaN	NaN	NaN	NaN	NaN	NaN	NaN	NaN	NaN	NaN	NaN	NaN	NaN	NaN	NaN	S	3			0.989352	1.85698e-08	103.36	78.623	85.002	0.72458	135550000	93922000	41630000	3199
NaN	NaN	NaN	NaN	NaN	NaN	NaN	NaN	NaN	NaN	0.41429	NaN	NaN	NaN	NaN	NaN	NaN	NaN	NaN	NaN	NaN	NaN	NaN	NaN	NaN	NaN	NaN	NaN	NaN	NaN	NaN	NaN	NaN	NaN	NaN	NaN	S	3			0.735078	1.82319e-05	76.161	57.336	62.069	1.5065	7425900	5584900	1841000	3202
NaN	NaN	NaN	NaN	NaN	NaN	NaN	NaN	NaN	NaN	NaN	NaN	NaN	NaN	NaN	NaN	NaN	NaN	NaN	NaN	NaN	NaN	NaN	NaN	NaN	NaN	NaN	NaN	NaN	NaN	NaN	NaN	NaN	NaN	NaN	NaN	S	3			0.352728	3.06286e-06	76.161	57.336	76.161	-0.18388	0	0	0	3207
NaN	0.72602	0.61723	0.48004	NaN	0.60076	NaN	0.76318	0.78785	0.65187	0.40818	0.45493	0.67431	0.59006	0.98838	0.57079	0.35065	NaN	1.0304	0.53405	0.72963	NaN	NaN	NaN	0.69797	0.54368	NaN	0.66682	1.0645	0.55938	0.57012	0.76842	NaN	0.63552	0.75687	0.48177	S	3			0.998927	0.000851657	224.67	145.18	146.77	0.18367	154470000	92827000	61639000	4849
NaN	NaN	NaN	NaN	NaN	NaN	NaN	NaN	NaN	NaN	NaN	NaN	NaN	NaN	NaN	NaN	NaN	NaN	NaN	NaN	NaN	NaN	NaN	NaN	NaN	NaN	NaN	NaN	NaN	NaN	NaN	NaN	NaN	NaN	NaN	NaN	S	2			0.999933	0.00536521	75.057	50.558	75.057	0.24474	1630000	1630000	0	4822
0.99246	NaN	NaN	NaN	NaN	NaN	NaN	NaN	NaN	NaN	NaN	NaN	NaN	NaN	NaN	NaN	NaN	NaN	NaN	NaN	NaN	NaN	NaN	0.71321	0.61425	0.66559	0.66359	0.66404	NaN	NaN	1.9094	0.86259	0.78221	0.83612	1.0127	0.8978	S	2			1	0.000150088	72.207	54.761	52.019	2.8895	236270000	126890000	109380000	1671
NaN	NaN	NaN	NaN	0.73959	0.99143	NaN	NaN	NaN	0.64965	NaN	NaN	NaN	NaN	NaN	NaN	0.35624	0.39822	NaN	NaN	NaN	NaN	NaN	0.8218	NaN	NaN	NaN	NaN	NaN	0.64958	NaN	NaN	NaN	NaN	NaN	NaN	S	2			0.948301	0.000229043	106.26	46.891	106.26	-0.19349	26890000	17825000	9065200	2640
NaN	NaN	NaN	NaN	NaN	NaN	NaN	NaN	NaN	NaN	NaN	NaN	NaN	NaN	NaN	NaN	NaN	NaN	NaN	NaN	NaN	NaN	NaN	NaN	NaN	NaN	NaN	NaN	NaN	NaN	NaN	NaN	NaN	NaN	NaN	NaN	S	3			0.866572	0.000312139	149.42	123.81	149.42	-0.1765	23125000	9325000	13800000	3836
1.0519	0.62872	0.57091	0.41742	0.53035	0.52146	0.32442	0.36138	0.18553	NaN	NaN	NaN	NaN	NaN	NaN	NaN	NaN	NaN	0.92382	NaN	0.54521	0.5236	0.56892	0.39795	0.28371	0.24214	NaN	NaN	NaN	NaN	NaN	NaN	NaN	NaN	NaN	NaN	S	3			0.999987	0.000117819	252.12	205.25	244.27	-0.28001	394920000	288190000	106730000	3837
0.93197	0.50039	0.69953	0.59465	0.6999	0.76937	0.72359	0.92916	0.67202	0.65073	0.5835	0.51957	0.51262	0.96593	0.34821	NaN	0.40617	NaN	1.0145	0.57388	0.70502	0.63283	0.74176	0.7244	0.70736	0.66396	0.64576	0.61829	0.76532	0.58718	0.52705	0.39599	0.34967	0.23466	0.1849	0.20004	S	3			1	8.82312e-07	325.61	242.84	56.708	-0.52125	27712000000	16768000000	10945000000	280
NaN	0.68312	0.69297	0.6124	0.63743	0.67956	0.55352	NaN	NaN	0.5121	0.47755	0.37295	0.25569	0.1964	0.12453	NaN	0.059488	NaN	0.93883	0.66954	0.50438	0.65307	0.58164	0.64404	0.64246	0.57775	0.57607	0.53158	0.70043	0.39003	0.39853	0.24023	0.1656	0.099334	0.093497	NaN	S	2			1	9.00535e-07	119.39	57.047	98.368	0.25268	394710000	261710000	133000000	46
NaN	NaN	NaN	NaN	NaN	NaN	NaN	NaN	NaN	NaN	NaN	NaN	NaN	NaN	NaN	NaN	NaN	NaN	NaN	NaN	NaN	NaN	NaN	NaN	NaN	NaN	NaN	NaN	NaN	NaN	NaN	NaN	NaN	NaN	NaN	NaN	S	2			0.491935	2.72111e-05	114.78	88.369	114.78	-0.4502	0	0	0	290
NaN	NaN	NaN	NaN	NaN	NaN	NaN	NaN	NaN	NaN	NaN	NaN	NaN	NaN	NaN	NaN	NaN	NaN	NaN	NaN	NaN	NaN	NaN	NaN	NaN	NaN	NaN	NaN	NaN	0.53333	NaN	0.68577	NaN	1.0968	NaN	1.2682	S	2			0.625703	1.27198e-07	135.76	106.19	117.02	-0.83967	22691000	11778000	10913000	291
1.1911	NaN	1.2022	1.2619	NaN	NaN	NaN	NaN	0.90231	0.75163	0.94273	NaN	NaN	0.73528	NaN	NaN	NaN	1.3926	NaN	NaN	NaN	NaN	NaN	NaN	NaN	NaN	NaN	NaN	NaN	NaN	NaN	NaN	NaN	NaN	NaN	NaN	S	2			0.999834	9.05761e-05	101.43	72.302	101.43	-1.6557	23508000	10963000	12545000	186
0.91456	NaN	NaN	NaN	0.72163	0.64893	0.58347	0.7373	0.78089	0.64186	0.58835	NaN	NaN	NaN	NaN	NaN	0.11918	NaN	0.85828	0.68862	NaN	0.5492	0.523	0.06562	NaN	NaN	NaN	NaN	NaN	NaN	NaN	0.18775	0.17008	0.13537	NaN	NaN	S	3			0.999239	1.37114e-05	83.826	59.345	83.411	-0.31759	1046200000	689970000	356190000	301
NaN	NaN	NaN	NaN	NaN	0.84252	NaN	NaN	NaN	NaN	NaN	NaN	NaN	NaN	NaN	NaN	NaN	NaN	NaN	NaN	NaN	NaN	NaN	NaN	NaN	NaN	0.54544	NaN	NaN	NaN	NaN	NaN	NaN	NaN	NaN	NaN	S	3			0.916965	1.60081e-31	210.35	168.32	161.93	0.025482	34332000	18718000	15614000	331
NaN	0.65941	0.99188	NaN	0.85174	0.99309	NaN	NaN	NaN	NaN	NaN	0.81357	0.39877	NaN	0.52859	NaN	NaN	NaN	NaN	NaN	NaN	NaN	NaN	NaN	NaN	NaN	NaN	NaN	NaN	NaN	NaN	NaN	NaN	NaN	NaN	NaN	S	3			0.992329	0.00077754	192.4	160.74	167.12	-0.24806	18911000	10892000	8018800	333
NaN	NaN	NaN	NaN	NaN	NaN	NaN	0.64399	NaN	NaN	NaN	NaN	NaN	NaN	NaN	NaN	NaN	NaN	NaN	NaN	NaN	NaN	0.60969	NaN	NaN	NaN	NaN	NaN	NaN	NaN	NaN	NaN	NaN	NaN	NaN	NaN	S	2			0.755716	0.000156526	115.91	88.193	115.91	0.1033	56319000	28713000	27606000	284
1.0105	NaN	0.66237	0.64155	0.63938	0.68812	0.49754	NaN	0.50634	NaN	NaN	0.1237	0.11157	0.10856	NaN	0.089347	NaN	NaN	NaN	0.68754	NaN	NaN	NaN	0.59121	0.49344	0.37738	NaN	NaN	NaN	NaN	0.093856	0.076861	0.084594	0.066193	NaN	NaN	S	2			0.984715	6.59519e-06	125.03	105.75	98.391	0.12874	464230000	318780000	145460000	286
NaN	NaN	NaN	NaN	NaN	NaN	NaN	NaN	NaN	NaN	NaN	NaN	NaN	NaN	NaN	NaN	NaN	NaN	NaN	NaN	NaN	NaN	NaN	NaN	NaN	NaN	0.36194	NaN	NaN	NaN	NaN	NaN	NaN	NaN	NaN	NaN	S	2			0.649938	0.00491964	77.644	37.766	74.776	0.33151	22955000	12978000	9976900	288
0.9698	0.976	0.70691	0.65953	0.54856	0.98089	NaN	1.1628	0.74642	NaN	0.79902	0.47464	0.52225	1.1055	0.6718	0.45652	NaN	NaN	0.99284	1.1251	0.66797	0.66589	0.83513	0.73754	NaN	0.60872	1.7483	NaN	0.75923	0.50144	NaN	0.43565	0.53155	0.79964	NaN	NaN	S	3			0.999968	0.000370554	256.36	216.57	256.36	0.19084	154690000	92222000	62469000	833
NaN	NaN	NaN	NaN	NaN	NaN	NaN	NaN	NaN	NaN	NaN	NaN	NaN	NaN	NaN	NaN	NaN	NaN	NaN	NaN	NaN	NaN	NaN	NaN	NaN	NaN	NaN	NaN	NaN	NaN	NaN	NaN	NaN	NaN	NaN	NaN	S	3			0.499747	1.03708e-07	123.61	75.669	76.015	-0.23047	0	0	0	366
NaN	NaN	NaN	0.80143	NaN	NaN	0.66095	0.85138	NaN	NaN	NaN	NaN	NaN	NaN	NaN	NaN	NaN	NaN	1.0338	0.90769	0.73909	NaN	0.71592	NaN	0.8571	NaN	NaN	NaN	0.55038	NaN	NaN	NaN	NaN	NaN	NaN	0.27329	S	3			0.957185	2.04652e-11	130.89	106.21	130.89	0.69618	208530000	136670000	71859000	367
NaN	NaN	NaN	NaN	NaN	NaN	NaN	0.55412	0.49889	NaN	NaN	NaN	0.64371	NaN	NaN	NaN	0.57483	0.32186	NaN	NaN	NaN	NaN	NaN	NaN	NaN	NaN	NaN	NaN	NaN	NaN	NaN	NaN	NaN	NaN	NaN	NaN	S	3			0.928833	0.00123215	136.7	73.518	136.7	0.40385	17519000	12091000	5428000	917
0.98456	0.61801	NaN	NaN	NaN	NaN	NaN	NaN	NaN	NaN	NaN	NaN	NaN	NaN	NaN	NaN	NaN	NaN	1.2127	0.70931	NaN	NaN	NaN	NaN	NaN	NaN	NaN	NaN	NaN	NaN	NaN	NaN	NaN	NaN	NaN	NaN	S	3			0.999974	2.30736e-08	121.82	98.382	116.39	0.53366	275110000	209510000	65602000	11
NaN	NaN	NaN	NaN	NaN	NaN	NaN	NaN	NaN	NaN	NaN	NaN	NaN	NaN	NaN	NaN	NaN	NaN	NaN	NaN	NaN	NaN	NaN	0.67319	NaN	1.0085	1.0464	0.82607	1.0506	NaN	NaN	1.0317	NaN	0.7804	1.0766	NaN	S	3			0.960474	0.000154478	71.592	42.012	71.592	0.68048	32187000	17214000	14973000	196
NaN	0.69054	0.64198	0.59239	0.76817	0.83274	0.7439	0.8855	NaN	0.70148	NaN	0.69625	0.96565	0.88364	NaN	0.90288	0.72164	NaN	1.0559	0.78662	1.0077	NaN	NaN	NaN	NaN	0.62375	0.71065	0.6486	NaN	0.84515	0.64329	0.80474	0.64587	0.64333	NaN	0.67295	S	3			0.998841	0.000421646	234.47	201.28	234.47	0.077131	1427400000	816750000	610640000	31
0.98393	0.72474	0.62253	NaN	0.75561	0.87351	0.71216	0.88058	NaN	0.51304	NaN	0.72896	NaN	NaN	0.64472	0.4986	NaN	NaN	0.93192	0.62135	0.66041	0.62114	0.64043	1.0438	1.1226	0.74208	0.51788	0.7483	0.85262	0.6875	0.80933	0.75001	0.83835	0.62875	0.55192	0.48184	S	2			1	3.29839e-22	176.94	124.44	144.97	-0.073788	371610000	216740000	154870000	203
0.76968	0.85234	0.75461	0.74085	0.96121	0.98877	0.76697	1.0281	1.1434	0.84032	0.72014	0.6786	NaN	0.91714	NaN	0.91184	0.72605	1.9613	0.77607	0.86172	NaN	NaN	NaN	0.74378	NaN	NaN	NaN	NaN	0.8626	NaN	0.92116	NaN	NaN	NaN	NaN	0.85265	S	2			0.987106	1.37802e-12	143.09	110.61	87.155	-0.12981	1146700000	615950000	530750000	61
0.98234	0.82762	0.80153	0.56482	0.77496	0.78124	0.87441	0.93971	1.1321	0.97678	0.80786	0.86501	NaN	1.1825	1.1564	0.96627	1.1723	1.0995	1.2465	1.179	NaN	1.2307	1.36	NaN	0.78393	0.79516	0.59371	1.1484	0.9051	0.82226	0.78456	0.72817	NaN	0.54377	0.98527	0.84894	S	3			0.999996	6.26831e-05	262.24	211.79	249.36	0.40453	462830000	263140000	199690000	672
NaN	NaN	NaN	NaN	NaN	NaN	NaN	NaN	NaN	NaN	NaN	NaN	NaN	NaN	NaN	NaN	NaN	NaN	NaN	NaN	NaN	NaN	NaN	NaN	NaN	NaN	NaN	NaN	NaN	NaN	NaN	NaN	0.57227	NaN	NaN	0.66924	S	2			0.836433	0.000187951	93.909	55.609	64.52	-0.2047	9569200	6141000	3428200	50
NaN	NaN	NaN	NaN	NaN	NaN	NaN	NaN	NaN	NaN	NaN	NaN	NaN	NaN	NaN	NaN	NaN	NaN	NaN	NaN	NaN	NaN	NaN	NaN	NaN	NaN	NaN	NaN	NaN	0.5974	NaN	0.66683	NaN	0.70798	0.51549	NaN	S	2			0.931651	7.90046e-05	102.65	66.62	81.526	0.20468	29652000	17958000	11694000	51
1.0834	0.54084	0.69774	0.8273	0.74437	0.83514	NaN	1.1557	0.80031	NaN	0.82796	1.1018	NaN	1.3599	0.71243	0.52358	1.3816	0.4748	1.1347	1.2711	NaN	0.56669	1.0502	1.1764	0.45184	NaN	NaN	0.88086	NaN	0.74221	0.87573	0.71279	0.62042	NaN	0.72215	0.83864	S	3			0.565658	0.00122815	140.16	78.076	110.98	0.42963	104900000	54356000	50547000	388
1.0834	0.54084	0.69774	0.8273	0.74437	0.83514	NaN	1.1557	0.80031	NaN	0.82796	1.1018	0.63755	NaN	0.71243	0.52358	1.3816	0.4748	1.1347	1.2711	NaN	0.56669	1.0502	1.1764	0.45184	NaN	NaN	0.88086	NaN	0.74221	0.87573	0.71279	0.62042	NaN	0.72215	0.83864	S	3			0.807769	0.00122815	140.16	78.076	46.206	0.086411	102120000	53459000	48661000	389
NaN	NaN	NaN	NaN	NaN	NaN	NaN	NaN	NaN	NaN	NaN	NaN	NaN	NaN	NaN	NaN	NaN	NaN	NaN	NaN	NaN	NaN	0.89344	NaN	NaN	NaN	NaN	NaN	NaN	NaN	NaN	NaN	NaN	NaN	NaN	NaN	S	2			0.797929	0.00235474	68.291	43.867	68.291	1.2049	3448700	2429000	1019700	571
0.9829	0.92946	0.84241	0.78967	1.012	0.85889	0.75279	1.0091	1.0583	0.84975	1.0529	0.71552	0.93377	0.87385	0.73605	0.72185	0.66986	0.76652	1.0704	0.90571	1.5271	0.91715	0.67117	0.68297	0.7666	0.71082	0.83202	0.83995	0.97353	0.96067	0.89329	0.71872	1.1725	0.69059	0.80077	0.81493	S	3			1	0.000421296	296.28	271.38	110.38	0.1494	2354400000	1299200000	1055200000	20
NaN	NaN	NaN	NaN	NaN	NaN	NaN	NaN	NaN	NaN	NaN	NaN	NaN	NaN	NaN	NaN	NaN	NaN	NaN	NaN	NaN	NaN	NaN	NaN	0.64201	NaN	NaN	NaN	NaN	NaN	0.51165	NaN	NaN	NaN	NaN	NaN	S	3			0.890686	0.00202736	49.66	37.273	49.66	0.14611	64503000	40407000	24096000	240
NaN	NaN	NaN	NaN	NaN	NaN	NaN	NaN	NaN	NaN	NaN	NaN	NaN	NaN	NaN	NaN	NaN	NaN	NaN	NaN	NaN	NaN	NaN	NaN	NaN	NaN	NaN	NaN	NaN	NaN	NaN	NaN	NaN	NaN	NaN	NaN	S	3			0.436296	0.00473824	45.885	29.825	40.197	0.077322	0	0	0	243
NaN	NaN	NaN	NaN	NaN	NaN	NaN	NaN	NaN	NaN	NaN	NaN	NaN	NaN	NaN	NaN	NaN	NaN	NaN	NaN	NaN	NaN	NaN	NaN	NaN	NaN	NaN	NaN	NaN	NaN	NaN	0.37835	NaN	NaN	NaN	NaN	S	3			0.635312	0.00473824	45.885	29.825	40.622	0.19285	35503000	26264000	9238900	246
0.96883	0.49754	0.50039	0.43366	0.46004	0.41678	0.24716	NaN	0.41145	NaN	NaN	NaN	NaN	NaN	NaN	NaN	NaN	NaN	NaN	NaN	NaN	NaN	NaN	0.41665	NaN	NaN	NaN	NaN	NaN	NaN	NaN	NaN	NaN	NaN	NaN	NaN	S	3			0.977559	0.000446038	150.9	85.638	150.9	0.22153	40047000	26173000	13874000	53
NaN	NaN	NaN	NaN	NaN	NaN	NaN	NaN	NaN	NaN	NaN	NaN	NaN	NaN	NaN	NaN	NaN	NaN	NaN	NaN	NaN	NaN	NaN	NaN	NaN	NaN	NaN	NaN	NaN	NaN	NaN	NaN	NaN	NaN	NaN	NaN	S	3			0.987739	0.000446038	148.89	108.65	148.89	0.30343	2420100	2420100	0	54
NaN	NaN	NaN	NaN	NaN	NaN	NaN	NaN	NaN	NaN	NaN	NaN	NaN	NaN	NaN	NaN	NaN	NaN	0.96239	0.49385	0.87959	0.57145	0.41562	NaN	NaN	NaN	NaN	NaN	NaN	NaN	NaN	NaN	NaN	NaN	NaN	NaN	S	3			1	0.00129153	213.63	116.96	172.56	0.54407	51004000	41878000	9125600	432
NaN	NaN	NaN	NaN	NaN	0.68902	NaN	0.67367	1.2493	1.5583	0.78975	0.39359	1.092	0.629	NaN	1.5291	NaN	0.96298	0.9639	0.73239	1.9322	0.76482	0.36644	NaN	0.9502	0.87023	0.83618	0.64989	0.89872	0.90443	NaN	0.72704	0.6778	NaN	0.75142	NaN	S	3			1	0.00102826	196.52	160.98	159.66	0.016808	137150000	74949000	62206000	422
1.0385	0.64474	0.68441	0.64134	0.71336	0.81837	0.57891	0.85284	0.78127	0.49394	0.65018	0.73412	0.7375	0.80423	0.72124	0.59476	0.78642	0.65749	1.0186	0.79262	0.75791	0.66315	0.84933	0.74926	0.677	0.70047	0.68197	0.65173	0.76384	0.81002	0.83266	0.63128	0.64707	0.70746	0.68973	0.82672	S	3			1	4.32493e-40	363.48	336.38	197.21	-0.20396	4139200000	2324000000	1815200000	299
0.9833	0.48148	0.37206	0.32179	0.25321	NaN	0.31739	NaN	NaN	0.27848	NaN	NaN	NaN	1.0711	1.4635	NaN	NaN	2.5336	NaN	NaN	NaN	NaN	NaN	NaN	NaN	NaN	NaN	NaN	NaN	NaN	0.83342	1.2122	1.8248	2.279	NaN	2.3549	S	2			0.976701	0.00484152	71.176	40.447	59.728	0.25887	118510000	62208000	56297000	507
NaN	0.97477	1.0119	0.98196	NaN	1.0686	1.1633	1.4358	1.2001	NaN	NaN	NaN	0.97902	1.4621	NaN	1.1501	NaN	NaN	0.94775	1.149	0.64711	0.65983	1.0059	1.0069	NaN	NaN	1.2173	NaN	NaN	NaN	NaN	NaN	NaN	NaN	NaN	NaN	S	3			0.960725	1.91942e-06	284.1	230.56	226.09	0.54486	730220000	315250000	414970000	695
NaN	NaN	NaN	NaN	NaN	NaN	NaN	NaN	NaN	NaN	NaN	NaN	NaN	NaN	NaN	NaN	NaN	NaN	NaN	NaN	NaN	NaN	NaN	NaN	NaN	NaN	NaN	NaN	NaN	NaN	NaN	NaN	NaN	NaN	NaN	NaN	S	3			0.460027	7.46754e-05	60.218	49.289	60.218	0.064442	0	0	0	862
0.95289	1.204	0.74303	0.71214	1.028	1.0008	1.1934	1.0711	1.1724	1.0056	0.87929	0.86897	0.87712	1.0193	0.97277	1.3162	NaN	1.2598	1.0509	0.96439	2.0399	1.0212	1.3823	NaN	1.1642	0.84287	0.93704	0.93442	1.0148	1.0101	1.2261	0.94349	0.8166	0.64353	0.92978	1.4603	S	3			0.985358	5.89003e-09	100.7	100.7	81.315	-0.46001	1200100000	587710000	612390000	871
NaN	NaN	NaN	NaN	1.1011	NaN	NaN	NaN	NaN	NaN	NaN	NaN	NaN	NaN	NaN	NaN	NaN	NaN	NaN	NaN	NaN	NaN	NaN	NaN	NaN	NaN	NaN	NaN	NaN	NaN	NaN	NaN	NaN	NaN	NaN	NaN	S	4			0.64551	7.83879e-05	61.039	46.057	42.557	0.46288	20113000	11155000	8958300	877
0.93584	0.81673	0.68157	0.71146	0.5283	0.58882	0.44746	0.51143	0.53491	0.46115	0.49037	0.92943	1.5575	1.4273	1.8364	1.8507	1.8109	1.7005	1.0054	0.59519	0.56683	0.56366	0.31122	0.43405	0.50751	NaN	0.4421	0.59255	0.95445	0.96817	1.2702	0.90289	1.5361	1.4065	1.8751	1.7448	S	2			0.998361	2.14603e-05	123.55	99.298	96.391	0.06172	341580000	174910000	166670000	445
NaN	NaN	NaN	NaN	NaN	NaN	NaN	NaN	NaN	NaN	NaN	NaN	NaN	NaN	NaN	NaN	NaN	NaN	NaN	NaN	NaN	NaN	NaN	NaN	NaN	NaN	NaN	NaN	NaN	NaN	NaN	NaN	NaN	NaN	NaN	NaN	S	3			0.789034	0.000120199	55.472	39.039	46.024	0.87147	6206000	6206000	0	409
NaN	NaN	NaN	0.59144	NaN	NaN	0.79299	NaN	NaN	NaN	NaN	NaN	NaN	1.7293	NaN	1.0706	NaN	NaN	NaN	NaN	NaN	NaN	NaN	NaN	1.1435	NaN	0.82161	NaN	0.67728	NaN	1.0972	NaN	0.89358	1.0982	NaN	1.4296	S	4			0.993862	2.27311e-05	58.566	43.994	58.566	-0.050308	139070000	71812000	67258000	770
NaN	NaN	NaN	NaN	NaN	NaN	NaN	NaN	NaN	NaN	NaN	NaN	NaN	NaN	NaN	NaN	NaN	NaN	NaN	NaN	NaN	NaN	NaN	NaN	NaN	NaN	NaN	NaN	NaN	NaN	NaN	NaN	NaN	NaN	NaN	NaN	S	4			0.464213	2.27311e-05	58.566	43.994	42.59	-0.1889	0	0	0	778
NaN	NaN	NaN	NaN	NaN	NaN	NaN	NaN	NaN	NaN	NaN	NaN	NaN	NaN	NaN	NaN	NaN	NaN	NaN	NaN	NaN	NaN	NaN	NaN	NaN	NaN	NaN	NaN	NaN	NaN	NaN	NaN	NaN	NaN	NaN	NaN	S	4			0.464169	2.27311e-05	58.566	43.994	42.59	-0.1889	0	0	0	780
NaN	0.7483	0.79611	0.71048	0.56782	0.76404	0.42024	0.87188	0.79874	0.54647	0.62422	0.70271	0.73559	NaN	0.63719	0.42632	0.40228	0.3108	1.026	NaN	0.81843	0.63069	0.61064	0.7579	0.51635	0.43487	0.65336	0.45998	0.56081	0.42098	0.63006	0.5069	0.46509	0.63908	0.50409	0.4577	S	3			1	0.000375265	237.06	178.17	216.71	-0.11886	310590000	186600000	123990000	178
0.93021	0.57913	0.74779	0.71792	0.70191	0.71634	0.5967	0.91559	0.81376	0.56909	0.67621	0.59978	0.77934	0.73963	0.67222	0.68128	0.61878	0.63018	1.0161	0.59388	0.63024	0.65466	0.60727	0.64176	0.66733	0.67483	0.63627	0.7162	0.6989	0.5425	0.73373	0.5853	0.61224	0.60039	0.77332	0.6155	S	3			0.999997	1.61113e-16	238.83	197.21	191.79	0.11913	1519400000	870230000	649150000	241
NaN	NaN	NaN	NaN	NaN	NaN	NaN	NaN	NaN	NaN	NaN	NaN	NaN	NaN	0.79158	NaN	NaN	NaN	NaN	NaN	NaN	NaN	NaN	NaN	NaN	NaN	NaN	NaN	NaN	NaN	NaN	NaN	NaN	NaN	NaN	NaN	S	3			0.909051	0.000772124	132.79	91.71	123.96	-0.18898	17485000	9964800	7519700	245
0.97404	NaN	0.94032	NaN	NaN	1.0546	NaN	NaN	1.1562	NaN	0.88262	1.0139	1.035	NaN	0.89331	NaN	0.65367	NaN	1.2418	0.74519	0.83037	0.85402	NaN	NaN	0.84275	0.89523	0.72487	0.73522	NaN	0.72665	0.83548	0.8492	0.76515	0.71309	0.90798	0.78426	S	2			0.98668	1.17528e-16	169.49	146.96	136.85	0.58666	357820000	192230000	165590000	1031
NaN	NaN	NaN	NaN	NaN	NaN	NaN	NaN	NaN	NaN	NaN	NaN	NaN	NaN	NaN	NaN	NaN	NaN	NaN	NaN	NaN	NaN	NaN	NaN	NaN	NaN	NaN	NaN	NaN	NaN	NaN	NaN	NaN	NaN	NaN	NaN	S	3			0.798714	0.000257503	75.529	55.233	75.529	-0.48822	5368500	5368500	0	387
1.1197	0.91132	0.76601	0.84942	NaN	NaN	NaN	NaN	1.0447	NaN	NaN	NaN	NaN	NaN	NaN	NaN	NaN	NaN	1.1602	NaN	NaN	NaN	NaN	0.74427	NaN	NaN	NaN	0.7882	NaN	NaN	NaN	NaN	0.48369	NaN	NaN	NaN	S	3			0.951339	0.000108805	80.236	50.654	80.236	-1.4878	161950000	87007000	74944000	389
NaN	0.91208	NaN	NaN	NaN	NaN	NaN	1.0322	1.0703	NaN	NaN	NaN	NaN	NaN	NaN	NaN	NaN	NaN	NaN	1.0159	NaN	0.90062	NaN	NaN	NaN	NaN	NaN	0.92431	NaN	NaN	NaN	NaN	NaN	NaN	0.56941	NaN	S	4			0.945529	0.000572851	108.99	91.093	108.99	-0.38172	187740000	82729000	105010000	391
NaN	NaN	NaN	NaN	NaN	NaN	0.91653	NaN	NaN	0.7544	NaN	NaN	NaN	NaN	NaN	0.66773	0.50531	NaN	1.1589	NaN	NaN	NaN	NaN	NaN	NaN	NaN	NaN	NaN	0.97566	NaN	NaN	NaN	NaN	NaN	NaN	NaN	S	4			0.945124	0.00125323	65.374	65.374	62.861	-0.26064	108900000	55654000	53243000	395
1.0369	NaN	0.78508	0.65654	0.56005	0.62729	NaN	NaN	NaN	NaN	NaN	NaN	0.51179	0.8332	1.0551	NaN	2.0548	1.8707	1.4945	0.76167	0.79201	0.62058	0.64859	NaN	NaN	NaN	0.57538	0.49481	0.55387	0.51658	0.59707	0.74514	1.1399	1.6887	1.909	2.2838	S	3			1	3.34014e-05	85.563	61.725	85.563	-0.19363	302940000	156980000	145960000	1055
NaN	0.89369	0.60515	0.47376	0.5564	0.64263	0.50886	NaN	NaN	NaN	NaN	NaN	NaN	NaN	NaN	NaN	NaN	NaN	NaN	NaN	NaN	NaN	NaN	NaN	NaN	NaN	NaN	NaN	NaN	NaN	NaN	NaN	NaN	NaN	NaN	NaN	S	2			0.996374	0.00260708	80.96	53.278	80.96	1.6109	24350000	14063000	10287000	257
NaN	NaN	NaN	NaN	NaN	NaN	NaN	NaN	NaN	NaN	NaN	NaN	NaN	NaN	NaN	NaN	NaN	NaN	NaN	NaN	NaN	NaN	NaN	NaN	NaN	NaN	NaN	NaN	NaN	NaN	NaN	NaN	NaN	NaN	NaN	NaN	S	2			0.99829	7.66268e-07	130.56	97.415	130.56	-0.34041	4195000	4195000	0	261
NaN	0.76967	NaN	0.77627	0.88031	NaN	NaN	0.78746	NaN	1.0003	0.74088	0.53815	NaN	NaN	0.62119	0.58448	NaN	0.48672	0.92741	0.81003	1.2399	NaN	NaN	NaN	NaN	NaN	0.63351	NaN	NaN	1.0328	0.70663	0.67023	0.7059	NaN	0.75418	0.63819	S	3			0.987181	2.68092e-05	107.15	87.399	107.15	0.080541	62175000	33712000	28463000	91
0.74639	0.95532	NaN	NaN	NaN	0.83276	NaN	NaN	1.3893	NaN	NaN	NaN	NaN	NaN	NaN	NaN	NaN	1.0935	NaN	NaN	NaN	NaN	NaN	NaN	NaN	NaN	NaN	NaN	NaN	NaN	NaN	NaN	NaN	NaN	NaN	NaN	S	3			0.594719	0.000314349	69.024	52.712	69.024	0.45769	10639000	5493100	5146100	95
0.9011	0.73132	0.70068	0.63333	0.7518	0.75691	NaN	0.84693	NaN	0.60604	0.62218	0.70289	0.51188	NaN	NaN	NaN	NaN	NaN	0.87091	0.95964	0.66661	0.66745	0.72751	0.70723	0.61599	NaN	NaN	NaN	NaN	NaN	NaN	NaN	NaN	NaN	NaN	NaN	S	3			0.999108	0.000251933	128.01	77.71	97.631	-0.10863	173940000	101960000	71983000	1232
NaN	NaN	NaN	NaN	NaN	NaN	NaN	NaN	NaN	NaN	NaN	NaN	NaN	NaN	NaN	NaN	NaN	NaN	NaN	NaN	0.72802	0.53619	0.5603	NaN	NaN	0.57972	NaN	NaN	NaN	NaN	NaN	NaN	NaN	NaN	NaN	NaN	S	3			0.999999	4.75062e-05	148.89	106.81	148.89	-0.37205	30310000	18814000	11496000	758
0.93641	0.48086	0.47801	0.46517	0.47074	0.45952	0.33175	0.47155	0.41073	0.33423	0.27133	0.20267	0.11685	NaN	NaN	NaN	NaN	NaN	1.0126	0.41239	0.49843	NaN	0.35574	0.32182	0.28781	0.25575	0.27591	0.27923	0.37149	0.24165	NaN	NaN	NaN	NaN	NaN	NaN	S	2			1	0.000451896	100.11	67.112	74.966	0.0061636	238580000	169220000	69366000	743
0.8707	0.87446	0.74387	0.71681	0.83044	NaN	0.60466	0.82665	0.94259	0.73054	0.55688	NaN	0.73982	0.64233	0.68549	0.56396	0.40602	NaN	1.029	0.53811	0.7608	0.6211	0.59117	0.60221	0.75913	0.68177	0.74926	0.58637	0.85519	0.5118	0.55428	0.59097	0.56414	0.35998	0.54095	0.45572	S	2			0.998307	1.39577e-10	151.56	117.51	119.87	0.011943	329370000	195370000	133990000	358
NaN	NaN	NaN	NaN	NaN	NaN	NaN	NaN	NaN	NaN	NaN	NaN	NaN	NaN	NaN	NaN	NaN	NaN	NaN	NaN	NaN	NaN	NaN	NaN	NaN	NaN	NaN	NaN	NaN	NaN	NaN	NaN	NaN	NaN	NaN	NaN	S	2			0.416399	5.18133e-05	114.31	70.549	114.31	-0.28489	0	0	0	361
0.91469	NaN	0.80823	1.2146	0.56689	1.0276	0.53195	0.55669	0.69673	0.68596	NaN	NaN	NaN	NaN	NaN	NaN	NaN	NaN	1.0531	NaN	NaN	0.73983	0.59491	0.58162	0.7158	0.61535	0.48198	0.52626	0.54021	NaN	NaN	NaN	NaN	NaN	NaN	NaN	S	2			0.999365	4.69974e-18	219.89	183.9	169.84	0.90759	379370000	247560000	131820000	804
NaN	0.9725	NaN	NaN	0.56689	NaN	0.76089	NaN	NaN	NaN	NaN	NaN	NaN	NaN	NaN	NaN	NaN	NaN	NaN	NaN	NaN	NaN	NaN	NaN	NaN	NaN	NaN	NaN	0.37313	NaN	NaN	NaN	NaN	NaN	NaN	NaN	S	3			0.916803	0.000271128	196.48	161.73	183.33	0.17506	61679000	44376000	17304000	806
1.2095	1.0394	0.88139	0.78994	0.92656	0.87477	0.60861	NaN	1.036	0.64679	0.71715	0.5887	0.36197	0.32214	0.37419	0.4301	0.39032	0.47097	0.92867	0.96738	NaN	0.9426	1.1285	NaN	NaN	NaN	NaN	NaN	0.75955	0.46401	0.38513	0.33865	0.27765	0.22366	NaN	NaN	S	3			1	0.000515188	108.9	104.2	79.036	-0.91535	360290000	209110000	151180000	491
NaN	NaN	NaN	NaN	NaN	NaN	NaN	NaN	NaN	NaN	NaN	NaN	NaN	NaN	NaN	NaN	NaN	NaN	NaN	NaN	NaN	NaN	NaN	NaN	NaN	0.55404	NaN	NaN	NaN	NaN	NaN	0.63168	NaN	NaN	NaN	NaN	S	3			0.999466	5.74395e-06	134.68	81.447	111.09	0.34407	5170700	3281500	1889100	452
NaN	NaN	NaN	NaN	NaN	NaN	NaN	NaN	NaN	NaN	NaN	NaN	NaN	NaN	NaN	NaN	NaN	NaN	NaN	NaN	NaN	NaN	NaN	NaN	NaN	0.55404	NaN	NaN	NaN	NaN	NaN	0.63168	NaN	NaN	NaN	NaN	S	3			0.992936	5.74395e-06	134.68	81.447	111.09	0.34407	5170700	3281500	1889100	453
1.0314	0.5575	NaN	NaN	NaN	NaN	NaN	NaN	NaN	NaN	0.58164	0.55579	NaN	0.68746	NaN	NaN	NaN	NaN	0.89378	0.68558	0.57889	0.68203	0.69757	0.69463	0.60085	0.6395	0.67538	0.62203	0.70665	0.54647	0.64032	0.51612	0.55631	0.56464	0.57589	0.55116	S	2			0.999248	4.03986e-05	103.45	82.203	103.45	0.55463	291130000	169910000	121230000	467
NaN	NaN	0.53867	0.58626	0.58488	NaN	0.43842	0.67397	0.60717	0.50287	NaN	NaN	0.67563	NaN	0.5729	NaN	0.6423	0.67244	NaN	NaN	NaN	NaN	NaN	NaN	NaN	NaN	NaN	NaN	NaN	NaN	NaN	NaN	NaN	NaN	NaN	NaN	S	2			0.564849	0.0021909	71.001	39.337	71.001	-0.090288	112040000	69187000	42852000	470
NaN	NaN	NaN	NaN	NaN	NaN	NaN	NaN	NaN	NaN	NaN	NaN	NaN	NaN	NaN	NaN	NaN	NaN	1.5168	0.94977	NaN	1.0086	0.82695	NaN	1.5533	1.4213	1.5276	1.1273	1.1745	NaN	0.91352	NaN	0.7123	NaN	NaN	NaN	S	3			0.999767	0.000816457	72.321	52.329	72.321	-0.10796	42893000	20620000	22272000	2171
NaN	NaN	NaN	NaN	NaN	NaN	NaN	NaN	NaN	NaN	NaN	NaN	NaN	NaN	NaN	NaN	NaN	NaN	NaN	0.7208	NaN	NaN	0.63693	NaN	NaN	NaN	NaN	NaN	NaN	NaN	NaN	NaN	NaN	0.35603	NaN	NaN	S	3			0.724165	1.8192e-07	78.128	59.829	47.085	1.9207	80711000	60968000	19744000	1903
0.97334	0.60964	0.64234	0.58848	0.71156	0.76564	0.70478	0.97319	0.73534	0.83492	0.62689	0.40521	0.49058	0.29736	0.32164	0.28439	0.15569	0.13887	1.0023	0.64758	0.93427	0.76567	0.58736	0.54507	0.62569	0.62995	0.58562	0.61834	0.74384	0.47199	0.37193	0.32502	0.30011	0.20995	0.22483	0.16763	S	3			0.999946	1.77069e-18	177.21	141.59	132.52	-0.27934	2808500000	1834100000	974350000	1905
1.1037	NaN	NaN	0.63399	0.74753	0.69754	NaN	NaN	0.77859	0.59087	0.5147	0.35638	0.27124	0.21513	NaN	0.095915	0.068598	NaN	1.1954	0.81322	NaN	0.64947	NaN	0.66618	NaN	0.57121	0.58846	0.56161	0.57662	0.36104	0.29619	0.19865	0.19374	0.12051	NaN	0.10101	S	4			0.996959	1.61892e-10	87.868	67.386	61.738	-0.29571	1582100000	1036300000	545810000	779
NaN	NaN	NaN	NaN	NaN	0.70352	NaN	NaN	NaN	NaN	NaN	NaN	NaN	NaN	NaN	NaN	NaN	NaN	NaN	NaN	NaN	NaN	NaN	NaN	NaN	NaN	NaN	NaN	NaN	NaN	NaN	NaN	NaN	NaN	NaN	NaN	S	3			0.650215	2.04894e-10	87.025	70.313	68.93	0.23022	78601000	44362000	34239000	783
NaN	NaN	NaN	NaN	NaN	NaN	NaN	NaN	NaN	NaN	NaN	NaN	NaN	NaN	NaN	NaN	NaN	NaN	NaN	NaN	NaN	NaN	NaN	NaN	NaN	NaN	NaN	NaN	NaN	NaN	NaN	0.19755	NaN	NaN	NaN	NaN	S	3			0.686471	7.78231e-10	79.82	79.82	69.913	0.45848	23516000	20039000	3476900	785
1.0546	0.74781	0.72694	0.69124	0.75448	0.76001	0.65967	0.91614	0.78226	0.69776	0.66522	0.72497	0.79785	0.85395	0.74062	0.73515	0.71217	0.70497	1.0285	0.74171	0.66233	0.65096	0.67733	NaN	NaN	NaN	NaN	NaN	NaN	0.66182	0.73121	0.71473	0.69524	0.82946	0.74372	0.6863	S	2			1	6.50228e-05	111.07	94.076	56.588	0.071908	2177700000	1208300000	969390000	891
0.93994	NaN	NaN	NaN	0.71694	NaN	NaN	0.75022	NaN	NaN	0.42647	NaN	NaN	NaN	0.1575	NaN	0.075965	NaN	NaN	NaN	NaN	0.52472	0.5953	NaN	0.51134	NaN	NaN	NaN	NaN	0.21768	NaN	0.11563	0.10155	NaN	NaN	0.075376	S	2			0.96749	0.00196417	91.469	45.063	89.698	0.020577	260340000	183770000	76576000	1878
NaN	1.3774	0.7381	1.0472	0.89329	NaN	1.1082	NaN	0.97346	0.81636	0.89814	0.72394	NaN	0.70124	0.75335	0.83049	NaN	NaN	NaN	NaN	2.3356	NaN	1.0527	NaN	NaN	NaN	NaN	NaN	NaN	1.3447	NaN	NaN	NaN	NaN	NaN	NaN	S	4			0.88513	0.0021402	63.754	46.036	49.066	-0.015404	235210000	119140000	116080000	1149
NaN	NaN	NaN	NaN	NaN	NaN	NaN	NaN	NaN	NaN	NaN	0.61256	NaN	NaN	NaN	NaN	0.56509	NaN	NaN	NaN	NaN	NaN	NaN	NaN	NaN	NaN	NaN	NaN	NaN	NaN	0.78629	NaN	NaN	NaN	NaN	NaN	S	3			0.874992	0.00340568	52.455	31.958	52.455	-0.12508	90573000	67812000	22761000	411
NaN	NaN	NaN	NaN	NaN	NaN	NaN	NaN	NaN	NaN	NaN	NaN	NaN	NaN	NaN	NaN	NaN	NaN	NaN	NaN	NaN	NaN	NaN	NaN	NaN	NaN	NaN	NaN	NaN	NaN	0.78629	NaN	NaN	NaN	NaN	NaN	S	3			0.68225	0.00538382	45.652	30.129	40.697	-0.32364	27942000	20178000	7763800	414
NaN	NaN	NaN	NaN	NaN	NaN	NaN	NaN	NaN	NaN	NaN	0.61256	NaN	NaN	NaN	NaN	0.56509	NaN	NaN	NaN	NaN	NaN	NaN	NaN	NaN	NaN	NaN	NaN	NaN	NaN	0.78629	NaN	NaN	NaN	NaN	NaN	S	3			0.958924	0.00340568	52.455	31.958	47.394	0.3593	90573000	67812000	22761000	417
0.57362	1.1675	1.0787	NaN	1.0616	0.82582	0.62515	0.83789	0.86861	0.61627	0.68304	NaN	0.47538	NaN	0.1977	NaN	NaN	NaN	NaN	0.63698	1.1296	NaN	0.6954	NaN	NaN	NaN	NaN	NaN	NaN	0.76021	0.68968	0.59333	NaN	NaN	NaN	0.14957	S	4			1	2.34047e-14	103.4	87.741	103.4	-0.041327	2510300000	1492400000	1017900000	1844
0.9993	0.65374	0.60176	0.65123	0.65025	0.73966	0.59554	0.82678	0.7099	0.62027	0.61015	0.61697	0.47229	0.45242	0.35479	0.25845	0.20621	0.13926	0.92189	0.67758	0.6071	0.60403	0.69682	1.5678	0.62664	0.59843	0.63865	0.64795	0.76767	0.53749	0.58619	0.37819	0.26493	0.26223	0.20908	0.16522	S	3			1	4.90097e-07	252.21	147.02	213.63	0.59918	1590300000	940260000	650040000	136
1.0973	0.88032	0.73914	0.77165	0.68362	1.0369	0.9453	0.57824	0.87956	1.7729	0.49327	0.27055	0.33702	NaN	0.28604	0.21834	NaN	0.16788	1.0408	0.58632	1.5709	0.65555	0.4996	0.51797	0.63257	0.61378	0.68435	NaN	0.6789	0.29882	NaN	0.28141	NaN	NaN	0.36811	NaN	S	3			1	0.000183308	167.03	134.73	116.58	-0.12015	465930000	287030000	178900000	1786
0.98624	0.8632	0.80163	0.672	0.73453	1.2844	NaN	0.86456	NaN	1.7295	0.66677	0.69583	NaN	0.64428	0.46191	NaN	NaN	NaN	NaN	NaN	NaN	0.61051	NaN	0.75764	NaN	NaN	NaN	NaN	NaN	NaN	0.79586	NaN	0.59097	NaN	NaN	NaN	S	3			0.922647	5.00712e-11	110.25	87.928	110.25	0.23109	618060000	365050000	253010000	2074
1.1977	1.2135	0.80163	0.672	0.73453	1.2844	NaN	0.86456	0.83609	1.7295	0.66677	0.69583	0.48624	NaN	0.39429	NaN	NaN	NaN	NaN	NaN	NaN	NaN	0.62319	NaN	NaN	0.73043	NaN	NaN	0.82808	0.81091	NaN	NaN	0.59097	0.51445	NaN	NaN	S	3			0.902783	2.3598e-11	114.21	85.037	114.21	0.23808	633620000	367110000	266500000	2075
NaN	NaN	NaN	0.81561	NaN	NaN	NaN	1.0484	1.0681	NaN	NaN	0.86906	NaN	0.95932	0.93563	0.97868	NaN	NaN	1.0729	0.84963	NaN	0.84321	NaN	NaN	NaN	0.8419	NaN	0.86306	NaN	0.88753	NaN	NaN	NaN	0.87369	NaN	NaN	S	3			0.82424	1.69923e-49	205.02	167.72	102.47	0.19629	973470000	526020000	447450000	390
1.0115	0.92812	0.8886	0.83202	0.88503	0.95801	0.79975	1.0945	NaN	0.85784	0.78981	0.83263	0.92853	0.90213	0.82885	0.99346	0.81617	0.88255	1.1307	NaN	0.80385	0.84539	0.77531	0.7929	0.87968	0.77074	0.81766	0.84966	1.0302	NaN	0.8905	0.84642	0.84292	NaN	0.85478	0.87657	S	2			0.999645	8.43202e-63	211.98	174.54	211.98	0.3388	1749900000	949820000	800090000	391
NaN	NaN	NaN	NaN	NaN	NaN	NaN	NaN	NaN	NaN	NaN	NaN	NaN	NaN	NaN	NaN	NaN	NaN	NaN	NaN	NaN	NaN	NaN	NaN	NaN	NaN	NaN	NaN	NaN	NaN	NaN	NaN	NaN	NaN	NaN	NaN	S	3			0.544968	3.64648e-07	73.919	58.531	73.919	-0.19959	7254900	0	7254900	1258
NaN	NaN	NaN	NaN	NaN	NaN	NaN	NaN	NaN	NaN	NaN	NaN	NaN	NaN	NaN	NaN	NaN	NaN	NaN	NaN	NaN	NaN	NaN	NaN	NaN	NaN	NaN	NaN	NaN	NaN	NaN	NaN	NaN	NaN	NaN	NaN	S	3			0.355949	6.60276e-05	51.125	38.661	51.125	0.20213	0	0	0	1259
NaN	NaN	NaN	NaN	NaN	NaN	NaN	NaN	NaN	NaN	NaN	NaN	NaN	NaN	NaN	NaN	NaN	NaN	NaN	NaN	NaN	NaN	NaN	NaN	NaN	NaN	NaN	NaN	NaN	NaN	NaN	NaN	NaN	NaN	NaN	NaN	S	3			0.388839	3.21311e-05	57.934	40.243	53.28	0.28282	0	0	0	1263
1.0059	0.65175	0.56723	0.4587	0.46931	0.37848	0.28327	0.21108	0.10425	0.043996	0.024051	0.014475	NaN	0.010971	NaN	0.0080665	0.0069678	NaN	0.98139	0.66214	0.74794	0.59189	0.46469	0.37612	0.21846	0.092951	0.03852	0.068308	0.044913	0.012218	0.013431	0.0093245	0.0080402	0.012229	0.0065937	0.012784	S	4			0.999999	3.79296e-05	162.26	120.68	162.26	-0.27871	13569000000	10121000000	3448500000	67
0.88699	0.81778	0.68816	0.61567	0.62057	0.68773	0.56633	0.71795	0.67127	0.62052	0.52412	0.64912	0.68295	0.78349	0.73122	0.64395	0.57131	0.61746	1.0172	0.67484	0.52312	0.52491	0.55426	0.63284	0.61876	0.52768	0.59381	0.60826	0.62596	0.47328	0.6397	0.61242	0.5999	0.62709	0.58179	0.66835	S	2			0.999718	4.73571e-15	157.58	157.58	157.58	-0.18498	614330000	356060000	258270000	485
NaN	NaN	NaN	NaN	NaN	NaN	NaN	NaN	NaN	NaN	NaN	NaN	NaN	NaN	NaN	NaN	NaN	NaN	NaN	NaN	NaN	NaN	0.8499	NaN	NaN	NaN	NaN	NaN	NaN	NaN	NaN	NaN	NaN	NaN	NaN	NaN	S	3			0.499916	1.50339e-07	92.613	64.203	75.224	-0.25143	26964000	14370000	12594000	468
0.95081	NaN	NaN	NaN	0.90091	0.87641	0.8377	0.96922	NaN	0.83144	NaN	NaN	NaN	NaN	NaN	0.89777	NaN	0.89693	0.97832	1.0034	0.72656	0.83987	0.8499	0.75916	0.73877	0.72749	NaN	0.75649	0.91749	0.79337	0.79228	0.86793	0.80156	0.6401	0.90418	0.73491	S	3			0.837069	1.50339e-07	92.613	64.203	84.689	-0.59	562920000	323480000	239440000	470
NaN	NaN	NaN	NaN	NaN	NaN	NaN	NaN	NaN	NaN	NaN	NaN	NaN	NaN	NaN	NaN	NaN	0.35165	NaN	NaN	NaN	NaN	NaN	NaN	NaN	NaN	NaN	NaN	NaN	NaN	NaN	NaN	NaN	NaN	NaN	NaN	S	3			1	0.00247105	51.431	34.712	51.431	0.78655	2815500	2185400	630120	1044
NaN	NaN	NaN	NaN	NaN	NaN	NaN	NaN	NaN	NaN	NaN	NaN	NaN	NaN	NaN	NaN	NaN	0.35165	NaN	NaN	NaN	NaN	NaN	NaN	NaN	NaN	NaN	NaN	NaN	NaN	NaN	NaN	NaN	NaN	NaN	NaN	S	3			1	0.00247105	51.431	34.712	51.431	0.78655	2815500	2185400	630120	1049
1.1038	NaN	NaN	NaN	NaN	NaN	NaN	NaN	NaN	NaN	NaN	NaN	NaN	NaN	NaN	NaN	NaN	NaN	0.94874	NaN	NaN	0.39543	0.46459	NaN	NaN	NaN	NaN	NaN	NaN	NaN	NaN	NaN	NaN	NaN	NaN	NaN	S	2			0.999954	6.61969e-24	180.03	143.08	157.88	-0.087405	39367000	27594000	11773000	1435
1.0621	0.65569	0.86846	0.74466	0.8112	0.56484	0.60792	1.1089	0.80346	NaN	0.86776	0.90353	0.58995	1.0998	0.74304	0.61246	1.1039	0.76272	1.0341	0.75029	NaN	0.78112	1.127	1.0708	0.83956	0.76055	0.83326	0.68068	0.98066	0.7233	1.2471	0.71728	0.68143	NaN	0.87564	1.001	S	2			1	0.000726283	120.06	52.728	110.39	-0.036494	175730000	92112000	83617000	191
1.4597	NaN	NaN	NaN	1.2057	1.1592	NaN	1.6268	NaN	1.3347	0.94606	NaN	1.1723	0.7361	0.75929	NaN	0.77026	0.53033	1.5215	1.154	1.1439	1.0941	0.77446	NaN	NaN	NaN	NaN	NaN	NaN	NaN	NaN	NaN	NaN	NaN	NaN	NaN	S	3			0.989579	0.000182244	77.554	53.074	70.837	-0.11782	156810000	82631000	74176000	251
NaN	NaN	NaN	NaN	NaN	1.1592	NaN	1.6268	NaN	NaN	NaN	NaN	1.1723	0.7361	NaN	NaN	0.77026	NaN	1.5215	1.154	1.1439	1.0941	NaN	NaN	NaN	NaN	NaN	NaN	NaN	NaN	NaN	NaN	NaN	NaN	NaN	NaN	S	3			0.934125	0.000182244	71.637	52.29	71.637	-0.19414	76252000	39606000	36646000	255
NaN	NaN	NaN	NaN	NaN	NaN	NaN	NaN	NaN	NaN	NaN	NaN	NaN	NaN	NaN	NaN	NaN	NaN	NaN	NaN	0.96769	NaN	NaN	NaN	NaN	NaN	NaN	NaN	NaN	NaN	NaN	NaN	NaN	NaN	NaN	NaN	S	3			0.937888	0.000744433	82.515	60.655	82.515	1.2137	11239000	6321200	4918300	1458
0.94595	NaN	NaN	NaN	NaN	NaN	NaN	NaN	NaN	0.88527	NaN	NaN	NaN	NaN	NaN	NaN	NaN	NaN	NaN	NaN	NaN	NaN	NaN	NaN	NaN	NaN	NaN	NaN	NaN	NaN	NaN	NaN	NaN	NaN	NaN	NaN	S	3			0.989556	0.000570821	60.388	41.332	60.388	0.18633	23373000	13658000	9714900	556
0.9467	0.70931	0.73853	NaN	NaN	0.75937	NaN	NaN	NaN	0.53689	0.51531	0.4742	0.37078	NaN	0.24002	NaN	NaN	NaN	NaN	NaN	NaN	NaN	NaN	NaN	0.7071	0.64514	0.66391	NaN	0.71759	NaN	0.48424	0.36164	NaN	NaN	NaN	NaN	S	4			0.824729	0.00165087	87.323	69.123	87.323	-0.084515	503940000	310860000	193070000	43
1.0471	0.65601	0.75804	0.69961	0.76515	0.91093	0.6849	0.84657	0.78684	0.64955	0.66489	0.42366	0.21256	0.23414	NaN	NaN	NaN	NaN	NaN	NaN	1.1023	0.78186	NaN	0.79136	0.87878	0.77458	0.69772	0.52446	0.68988	0.6148	0.36371	0.22304	0.19603	NaN	NaN	NaN	S	3			0.99895	0.000226782	238.19	206.79	238.19	-0.44651	333580000	193950000	139620000	310
NaN	NaN	0.75804	NaN	0.76515	0.91093	0.6849	0.84657	NaN	0.64955	0.66489	0.42366	0.21256	NaN	0.17413	NaN	NaN	NaN	NaN	NaN	NaN	NaN	NaN	NaN	NaN	NaN	NaN	NaN	NaN	NaN	NaN	NaN	NaN	NaN	NaN	NaN	S	3			0.76782	0.000284342	160.67	113.37	160.67	-0.051956	127980000	81137000	46848000	311
0.94241	0.59996	0.61138	0.48655	0.63362	0.65604	0.62738	0.7705	0.79357	0.45583	0.70371	0.77026	0.72482	0.97358	0.7189	0.82354	0.74222	0.63075	1.1062	0.845	NaN	0.8184	0.81641	0.7239	0.74884	0.75274	0.72097	0.76744	0.73432	0.79823	0.79437	0.66512	0.75791	0.66158	0.69192	0.57643	S	4			0.999945	0.000396174	72.916	54.761	49.924	0.08863	1138100000	644400000	493750000	209
NaN	NaN	NaN	NaN	NaN	NaN	NaN	NaN	NaN	NaN	NaN	NaN	NaN	NaN	NaN	NaN	NaN	NaN	NaN	NaN	NaN	NaN	NaN	NaN	0.66187	0.66883	0.68131	NaN	0.78225	NaN	NaN	NaN	0.47666	0.46114	0.58608	0.63208	S	3			0.999804	0.00016807	75.682	57.421	61.096	0.17626	140730000	76645000	64084000	1025
NaN	NaN	NaN	NaN	NaN	NaN	NaN	NaN	NaN	NaN	NaN	NaN	NaN	NaN	NaN	NaN	NaN	NaN	NaN	NaN	NaN	NaN	NaN	NaN	0.66187	0.66883	0.68131	NaN	0.78225	NaN	NaN	NaN	0.47666	0.46114	0.58608	0.63208	S	3			0.999991	0.00016807	75.682	57.421	61.096	0.17626	140730000	76645000	64084000	1028
NaN	NaN	0.70412	NaN	NaN	NaN	NaN	NaN	NaN	NaN	NaN	NaN	NaN	NaN	NaN	NaN	NaN	NaN	NaN	NaN	NaN	NaN	NaN	NaN	0.9035	NaN	NaN	NaN	NaN	NaN	NaN	NaN	NaN	NaN	NaN	NaN	S	3			0.5	0.000306916	168.22	130.37	162.81	0.11846	23654000	13020000	10634000	808
1.1911	0.59428	0.70412	0.61689	0.60749	0.84093	0.87825	0.55161	0.85981	1.377	0.6194	0.3255	0.86579	0.29265	0.63315	1.0725	NaN	0.31538	1.0203	0.59653	1.3714	0.56438	NaN	NaN	0.9035	0.70986	0.76691	0.50155	0.78339	0.75895	NaN	0.59847	0.40038	NaN	NaN	NaN	S	3			1	3.65867e-05	281.49	243.33	166.92	0.27032	512830000	298230000	214600000	811
NaN	NaN	NaN	NaN	NaN	NaN	NaN	NaN	NaN	NaN	NaN	NaN	NaN	NaN	NaN	NaN	NaN	NaN	NaN	NaN	NaN	NaN	NaN	NaN	NaN	NaN	NaN	NaN	NaN	NaN	NaN	NaN	NaN	NaN	NaN	NaN	S	3			0.659583	5.827e-06	76.161	56.468	76.161	-0.37113	12532000	0	12532000	660
NaN	NaN	NaN	NaN	NaN	NaN	NaN	NaN	NaN	NaN	NaN	NaN	NaN	NaN	NaN	NaN	NaN	NaN	NaN	NaN	NaN	NaN	NaN	NaN	NaN	NaN	NaN	NaN	NaN	NaN	NaN	NaN	NaN	NaN	NaN	NaN	S	3			0.724503	4.08863e-07	107.03	71.875	70.771	0.17792	12003000	0	12003000	663
NaN	NaN	NaN	NaN	NaN	NaN	NaN	NaN	NaN	NaN	NaN	NaN	NaN	NaN	NaN	NaN	NaN	NaN	NaN	NaN	NaN	NaN	NaN	NaN	NaN	NaN	NaN	NaN	NaN	NaN	NaN	NaN	NaN	NaN	NaN	NaN	S	3			0.309632	0.000753796	58.294	35.075	58.294	0.1498	0	0	0	664
NaN	NaN	NaN	NaN	NaN	NaN	NaN	NaN	0.90411	NaN	NaN	NaN	NaN	NaN	NaN	NaN	0.79449	NaN	NaN	NaN	NaN	NaN	NaN	NaN	NaN	NaN	NaN	NaN	NaN	NaN	NaN	NaN	NaN	NaN	NaN	NaN	S	3			0.509625	0.00129002	52.451	33.234	44.441	-0.11476	17341000	9498600	7842600	75
NaN	0.7378	0.78421	0.82262	NaN	0.72674	0.6437	0.9089	NaN	0.60718	NaN	0.92693	0.72134	0.91444	0.77508	0.67265	NaN	0.6004	NaN	NaN	NaN	0.75552	0.66866	0.62877	NaN	0.70872	0.75448	0.81476	0.79242	0.64684	NaN	0.49911	NaN	0.5918	NaN	NaN	S	3			0.896672	6.70122e-05	71.434	43.681	67.848	-0.27775	169480000	99341000	70140000	77
1.0517	1.0308	NaN	0.82169	1.029	0.92343	0.99785	NaN	1.0253	1.3096	0.79052	0.6515	NaN	0.57809	1.1699	1.1582	NaN	NaN	0.96563	0.68555	NaN	1.0087	0.8097	NaN	NaN	NaN	NaN	NaN	NaN	NaN	NaN	NaN	NaN	1.161	NaN	NaN	S	2			0.99505	4.24669e-26	163.78	106.17	110.1	-0.44339	157940000	71240000	86697000	90
1.0697	0.77894	0.66243	0.60266	0.61445	0.81896	0.49843	0.77488	0.59189	0.51877	0.56822	0.68754	0.64642	0.81041	0.58428	0.68794	0.54528	0.67726	0.85286	NaN	0.76859	0.71872	0.56322	NaN	NaN	0.5758	0.59938	0.50419	NaN	NaN	0.66768	NaN	NaN	0.54735	NaN	0.60716	S	3			0.999511	3.16043e-07	136.77	136.77	85.469	-0.68637	1071100000	664410000	406740000	208
NaN	NaN	NaN	NaN	0.86513	1.1984	NaN	NaN	NaN	NaN	NaN	NaN	0.32791	NaN	NaN	NaN	NaN	NaN	NaN	NaN	NaN	NaN	NaN	0.94349	0.80933	0.87968	0.52704	0.65005	0.9861	0.59833	0.55977	NaN	0.36721	NaN	0.27801	NaN	S	3			0.999631	0.000293621	133.48	103.47	76.693	0.46337	193230000	115330000	77899000	41
NaN	NaN	NaN	NaN	NaN	NaN	NaN	NaN	NaN	NaN	NaN	NaN	NaN	NaN	NaN	NaN	NaN	NaN	NaN	NaN	NaN	NaN	NaN	NaN	NaN	NaN	NaN	NaN	NaN	NaN	NaN	NaN	NaN	NaN	NaN	NaN	S	3			0.461221	0.000123882	52.402	33.164	40.336	0.17367	0	0	0	446
NaN	NaN	NaN	NaN	NaN	NaN	NaN	NaN	NaN	NaN	NaN	NaN	NaN	NaN	NaN	NaN	NaN	NaN	NaN	NaN	NaN	NaN	NaN	NaN	NaN	NaN	NaN	NaN	NaN	NaN	NaN	NaN	NaN	NaN	NaN	NaN	S	3			0.426848	0.000123882	53.064	43.563	53.064	-0.44668	0	0	0	452
NaN	NaN	NaN	NaN	NaN	NaN	NaN	NaN	NaN	NaN	NaN	NaN	NaN	NaN	NaN	NaN	NaN	NaN	NaN	NaN	NaN	NaN	NaN	NaN	NaN	NaN	NaN	NaN	NaN	NaN	NaN	NaN	NaN	NaN	NaN	NaN	S	3			0.426848	0.000123882	53.064	43.563	53.064	-0.44668	0	0	0	453
0.72268	0.88476	NaN	0.66715	1.0042	0.83251	0.89321	1.1083	1.1574	0.90517	NaN	NaN	0.85381	0.95589	0.7077	0.77753	0.78512	0.8421	NaN	0.83056	0.96827	0.65395	0.82079	NaN	0.69011	0.63572	0.9805	0.75965	NaN	0.64255	0.89312	0.83274	0.63756	0.7487	NaN	0.83677	S	3			1	0.000760345	202.65	177.31	202.65	-0.14875	198820000	110710000	88114000	465
NaN	NaN	NaN	NaN	NaN	NaN	NaN	NaN	NaN	NaN	0.66988	NaN	NaN	NaN	NaN	NaN	NaN	NaN	1.2808	NaN	NaN	NaN	NaN	NaN	NaN	NaN	NaN	NaN	NaN	NaN	NaN	NaN	NaN	NaN	NaN	NaN	S	3			0.866022	0.0397802	98.676	54.165	98.676	-0.10207	17991000	8909500	9081100	468
0.68252	1.1188	NaN	0.91042	1.0871	0.72653	NaN	1.7065	NaN	NaN	0.79912	1.5273	0.87439	1.6901	0.91716	0.57642	1.8824	1.1773	NaN	1.6509	1.0592	1.0645	2.7122	2.3121	NaN	NaN	NaN	NaN	NaN	NaN	2.6777	0.97664	1.0818	2.6225	0.90027	1.862	S	3			0.999707	0.00014404	73.296	50.163	73.296	-0.29292	377030000	164310000	212720000	363
0.68252	1.1188	NaN	0.91042	1.0871	0.72653	NaN	1.7065	NaN	NaN	0.79912	1.5273	0.87439	1.6901	0.91716	0.57642	1.8824	1.1773	NaN	1.6509	1.0592	1.0645	2.7122	2.3121	NaN	NaN	NaN	NaN	NaN	NaN	2.6777	0.97664	1.0818	2.6225	0.90027	1.862	S	3			1	0.00014404	73.296	50.163	71.988	0.38603	377030000	164310000	212720000	373
0.9669	0.67102	0.65555	0.73013	0.71139	0.65585	0.68041	0.89781	0.89119	0.66848	0.69471	0.65483	0.69732	0.77743	0.75422	0.70655	0.63789	0.65904	NaN	0.81517	0.78714	0.7081	0.73968	0.68785	0.80062	0.64566	0.7031	0.55861	0.85495	0.68433	0.71737	0.64588	0.72882	0.68338	0.67292	0.75881	S	3			0.999962	2.79289e-11	136.85	111.27	136.85	-0.38013	622180000	346200000	275980000	148
1.0913	0.84597	0.77867	0.80368	0.77469	0.87758	0.81696	1.0206	0.93691	0.85193	0.82221	0.86918	0.73909	0.70908	0.69399	0.70835	0.62618	0.71234	1.1349	0.89986	0.99936	0.89654	0.87893	0.85372	0.87711	0.74419	0.83698	0.83071	0.95892	0.71761	0.77798	NaN	0.58916	0.576	0.64353	0.69618	S	3			0.999998	0.00081102	222.88	175.99	168.89	0.025148	609930000	351700000	258230000	265
0.97406	0.85769	0.67833	0.81425	0.86983	0.89082	0.79849	1.0604	0.91207	0.86756	0.69554	0.58794	0.77159	0.96688	0.70081	0.56037	0.55155	0.4079	1.1416	0.7897	1.4789	0.7968	0.53242	0.52917	1.1165	0.74285	0.73514	0.73635	0.8392	0.97955	0.5192	0.64681	0.44051	0.2885	0.5055	0.26169	S	3			1	1.6985e-06	296.27	263.71	270.99	0.39874	591820000	333110000	258710000	6
1.0139	0.70952	0.81353	0.5112	NaN	0.78001	0.63704	0.95464	0.84641	0.79558	NaN	0.68338	0.77569	0.8073	0.69735	0.68058	0.79414	NaN	0.72306	NaN	NaN	NaN	0.67515	0.71517	0.5865	0.69167	0.81	0.71524	0.97716	0.63947	0.87659	0.68909	0.56868	0.53632	0.45798	0.94377	S	2			0.999998	7.15629e-37	189.57	158.19	154.66	-0.38998	1996700000	983890000	1012800000	95
NaN	NaN	NaN	NaN	0.76605	NaN	NaN	NaN	NaN	NaN	0.71646	NaN	NaN	NaN	NaN	NaN	NaN	0.5693	1.0134	NaN	NaN	0.67683	NaN	NaN	NaN	NaN	NaN	NaN	NaN	NaN	NaN	NaN	NaN	NaN	0.83833	NaN	S	3			0.989591	0.000371635	126.04	75.733	100.93	-0.21523	360180000	187210000	172970000	100
NaN	NaN	NaN	NaN	NaN	NaN	NaN	NaN	NaN	NaN	NaN	NaN	NaN	NaN	NaN	NaN	NaN	NaN	0.85336	1.0725	1.3208	NaN	NaN	NaN	0.54861	0.40683	NaN	NaN	NaN	NaN	NaN	NaN	NaN	NaN	NaN	NaN	S	4			0.85712	0.00185389	69.422	28.165	47.73	0.37785	55002000	33536000	21465000	517
NaN	NaN	NaN	NaN	NaN	NaN	NaN	NaN	NaN	NaN	NaN	NaN	NaN	NaN	NaN	NaN	NaN	NaN	NaN	NaN	NaN	NaN	NaN	NaN	0.54861	0.40683	NaN	NaN	NaN	NaN	NaN	NaN	NaN	NaN	NaN	NaN	S	4			0.914205	0.00185389	49.095	33.913	49.095	0.91386	19364000	16609000	2754900	522
0.9292	1.1357	1.0397	0.76567	0.76495	0.70783	0.68506	1.0512	0.99141	0.71079	0.76766	NaN	NaN	1.0474	1.0785	NaN	NaN	0.71017	1.0327	0.88139	0.89075	0.81877	1.0183	0.86422	0.75485	0.75433	0.794	0.81983	0.99007	0.69997	0.90146	0.82096	0.78805	0.83163	0.80908	0.86519	S	3			1	5.11863e-07	319.28	272.06	263.45	-0.034957	3358300000	1860600000	1497700000	137
NaN	NaN	NaN	NaN	NaN	NaN	NaN	NaN	NaN	0.58354	NaN	NaN	NaN	NaN	NaN	NaN	NaN	NaN	NaN	0.8751	NaN	NaN	NaN	NaN	NaN	NaN	NaN	NaN	NaN	NaN	NaN	NaN	NaN	NaN	NaN	NaN	S	2			0.831576	0.00310936	72.99	52.3	63.225	-1.0631	47059000	26170000	20889000	139
NaN	NaN	NaN	NaN	NaN	NaN	NaN	NaN	NaN	NaN	NaN	NaN	NaN	NaN	NaN	NaN	NaN	NaN	NaN	NaN	NaN	NaN	NaN	NaN	NaN	NaN	NaN	NaN	NaN	NaN	NaN	NaN	NaN	NaN	NaN	NaN	S	4			0.713893	0.000402058	85.909	49.252	53.981	-0.40763	9356800	0	9356800	594
NaN	NaN	NaN	NaN	NaN	NaN	NaN	NaN	NaN	NaN	NaN	NaN	1.2489	NaN	NaN	NaN	0.75582	NaN	NaN	NaN	NaN	NaN	NaN	NaN	NaN	NaN	NaN	NaN	NaN	NaN	NaN	NaN	NaN	NaN	NaN	NaN	S	4			0.970865	0.000423914	99.834	64.362	99.834	-0.32228	36070000	10826000	25244000	596
NaN	NaN	NaN	NaN	NaN	NaN	NaN	NaN	NaN	NaN	NaN	NaN	NaN	NaN	NaN	NaN	NaN	NaN	NaN	NaN	NaN	NaN	0.44014	0.38221	0.41497	NaN	NaN	NaN	NaN	NaN	NaN	NaN	NaN	NaN	NaN	NaN	S	2			0.871514	0.00353835	114.7	77.149	48.053	0.13779	43031000	31692000	11339000	90
NaN	NaN	NaN	NaN	NaN	NaN	NaN	NaN	NaN	NaN	NaN	NaN	NaN	NaN	NaN	NaN	NaN	NaN	1.0616	0.65528	0.6529	0.50955	NaN	NaN	NaN	0.31426	0.2503	0.27733	0.29116	NaN	NaN	NaN	NaN	NaN	NaN	NaN	S	3			0.993492	0.00119973	114.7	77.149	108.97	-0.11251	110020000	84140000	25876000	92
NaN	NaN	NaN	0.79627	0.80113	0.80335	NaN	1.0172	0.77523	1.3321	NaN	NaN	NaN	0.41195	NaN	NaN	NaN	NaN	1.0616	0.78844	NaN	0.7849	0.69962	NaN	NaN	NaN	NaN	NaN	NaN	NaN	NaN	NaN	NaN	NaN	NaN	NaN	S	3			0.998443	1.26649e-10	149.86	96.372	130.66	0.72487	679870000	441610000	238270000	96
NaN	NaN	NaN	NaN	NaN	NaN	NaN	NaN	NaN	NaN	NaN	NaN	NaN	NaN	NaN	NaN	NaN	NaN	NaN	NaN	0.6529	0.84633	0.53421	0.38221	0.41497	0.31426	0.2503	0.27733	0.29116	NaN	NaN	NaN	NaN	NaN	NaN	NaN	S	3			0.981899	6.25286e-05	155.97	92.153	113.54	0.00049978	176780000	120100000	56685000	98
0.93904	NaN	0.55194	NaN	0.9039	0.85328	0.59981	1.1275	NaN	0.54312	0.78695	NaN	0.52652	NaN	0.44644	0.31717	0.37301	NaN	NaN	1.203	NaN	0.99066	0.95778	1.4617	1.1484	0.91065	0.74287	1.001	1.0848	0.71434	1.2383	0.56528	0.48179	0.49918	NaN	0.53283	S	3			1	2.79386e-07	316.54	275.59	297.55	0.53164	293490000	150650000	142840000	537
NaN	NaN	NaN	0.6816	NaN	NaN	NaN	NaN	NaN	NaN	NaN	NaN	NaN	NaN	NaN	NaN	NaN	NaN	NaN	NaN	NaN	NaN	NaN	NaN	NaN	NaN	NaN	NaN	NaN	NaN	NaN	NaN	NaN	NaN	NaN	NaN	S	4			0.527432	1.19052e-05	55.484	29.232	55.484	-0.18693	6608700	3593100	3015600	195
NaN	NaN	NaN	NaN	NaN	NaN	NaN	NaN	NaN	NaN	NaN	NaN	NaN	NaN	NaN	NaN	NaN	NaN	NaN	NaN	NaN	NaN	NaN	NaN	NaN	NaN	NaN	NaN	NaN	NaN	NaN	NaN	NaN	NaN	NaN	NaN	S	4			0.462524	9.12513e-09	76.001	64.892	76.001	-0.29521	0	0	0	201
1.003	0.58853	0.44207	0.40492	0.43577	NaN	0.25048	NaN	NaN	NaN	0.16772	NaN	NaN	NaN	NaN	NaN	NaN	NaN	NaN	NaN	NaN	NaN	NaN	2.5508	NaN	NaN	0.25406	0.24101	NaN	NaN	NaN	0.17501	0.18538	NaN	NaN	0.21302	S	4			0.99224	1.64754e-07	66.409	53.291	66.409	0.68494	779630000	513380000	266250000	1003
NaN	NaN	NaN	NaN	NaN	NaN	NaN	NaN	NaN	NaN	NaN	NaN	NaN	NaN	NaN	NaN	NaN	NaN	NaN	NaN	NaN	NaN	NaN	NaN	NaN	NaN	NaN	NaN	NaN	NaN	NaN	NaN	NaN	NaN	NaN	NaN	S	4			0.354317	7.56344e-05	50.891	44.814	50.891	-0.069623	0	0	0	1011
0.93323	0.77971	0.62987	0.81723	0.79582	0.77771	0.55608	0.89649	NaN	0.43173	NaN	0.71398	0.47768	NaN	0.69128	0.34044	NaN	0.29025	1.0442	0.72095	NaN	NaN	0.63601	NaN	NaN	NaN	NaN	NaN	NaN	NaN	NaN	NaN	NaN	NaN	NaN	NaN	S	2			0.982508	2.54465e-07	133.9	105.61	68.978	-0.87851	402170000	189020000	213150000	240
1.1094	0.77971	0.62987	0.81723	0.79582	0.77771	0.55608	0.89649	NaN	NaN	NaN	0.71398	0.47768	NaN	0.69128	0.34044	NaN	0.29025	NaN	NaN	0.56229	0.62972	NaN	NaN	NaN	NaN	NaN	NaN	NaN	NaN	0.56211	NaN	NaN	NaN	NaN	NaN	S	2			0.866475	3.65633e-05	107.73	85.184	81.448	0.91493	275130000	121630000	153500000	241
0.83316	0.49724	0.56292	0.65908	0.61328	0.55071	0.56105	0.66096	0.60677	0.6766	0.54881	0.32429	0.64706	0.34297	0.54481	0.63281	0.22731	0.43546	0.89221	0.56467	0.57623	0.4765	0.68088	0.64731	0.5041	0.51081	0.52406	0.48284	0.50103	0.40377	0.76179	0.48531	0.5559	0.30891	0.5982	0.34824	S	2			1	1.56066e-07	184.71	68.924	59.931	0.03533	2630800000	1562900000	1068000000	183
1.0114	0.52997	NaN	0.44955	0.67234	NaN	0.28564	0.38518	0.27638	NaN	NaN	NaN	NaN	NaN	NaN	NaN	NaN	NaN	1.0555	NaN	0.71436	0.46371	0.34372	0.3347	NaN	NaN	NaN	NaN	NaN	NaN	NaN	NaN	NaN	NaN	NaN	NaN	S	3			1	0.00240088	258.41	181.35	127.83	-0.76749	228130000	176540000	51594000	180
0.93252	0.60753	0.53916	0.6478	0.51243	0.69665	0.52016	0.50607	0.62936	0.42719	NaN	NaN	NaN	NaN	NaN	NaN	NaN	NaN	1.0789	0.696	1.0102	0.8898	0.65504	0.71662	0.75529	0.5705	0.58495	0.55726	0.57945	NaN	NaN	NaN	NaN	NaN	NaN	NaN	S	3			1	5.68538e-05	211.38	156.2	149.65	-1.8741	314900000	197310000	117600000	185
0.8575	0.98796	0.65679	0.97779	1.0511	1.6288	1.0457	1.7822	1.4431	0.84719	1.177	1.0023	0.76179	0.63255	0.28926	NaN	NaN	NaN	0.99345	0.696	0.51582	0.97526	1.2389	1.0052	0.89306	1.0562	0.89094	1.2617	1.9608	1.1246	0.88832	0.7491	0.50175	NaN	0.32972	0.26635	S	3			1	4.84305e-29	211.38	156.2	149.65	-1.8741	713710000	398460000	315250000	191
NaN	NaN	NaN	NaN	NaN	NaN	NaN	NaN	NaN	NaN	NaN	NaN	NaN	NaN	NaN	NaN	NaN	NaN	NaN	NaN	NaN	NaN	NaN	NaN	NaN	NaN	0.32697	NaN	0.44194	NaN	NaN	NaN	NaN	NaN	NaN	NaN	S	3			0.993693	0.000629757	90.476	51.082	46.514	1.066	30715000	25220000	5495000	210
NaN	NaN	NaN	NaN	NaN	NaN	NaN	NaN	NaN	NaN	NaN	NaN	NaN	NaN	NaN	NaN	NaN	NaN	NaN	NaN	NaN	NaN	NaN	NaN	NaN	NaN	0.32697	NaN	0.44194	NaN	NaN	NaN	NaN	NaN	NaN	NaN	S	2			0.997233	1.62479e-06	127.32	85.498	118.51	0.17373	82876000	71855000	11021000	211
NaN	NaN	NaN	NaN	NaN	NaN	NaN	NaN	NaN	NaN	NaN	NaN	NaN	NaN	NaN	NaN	NaN	NaN	NaN	NaN	NaN	NaN	NaN	NaN	NaN	NaN	NaN	NaN	NaN	NaN	NaN	NaN	NaN	NaN	NaN	NaN	S	2			1	1.62479e-06	127.32	85.498	111.07	0.021665	65266000	59740000	5526000	215
0.98978	0.66608	0.70898	0.60226	0.71862	0.5955	0.50073	0.65548	0.55356	0.45888	0.36292	NaN	NaN	NaN	NaN	NaN	NaN	NaN	1.0206	0.63787	0.64724	0.48127	0.51147	0.44858	0.55932	0.54202	0.45955	NaN	0.50826	NaN	NaN	NaN	NaN	NaN	NaN	NaN	S	2			0.999935	1.26256e-15	158.33	119.15	107.21	-0.10072	414540000	289600000	124940000	134
0.99692	0.74075	0.67693	0.60195	NaN	NaN	NaN	NaN	0.6105	0.51717	NaN	NaN	NaN	NaN	NaN	NaN	NaN	NaN	NaN	NaN	NaN	NaN	0.47695	0.44858	0.55932	0.54202	NaN	NaN	0.50826	NaN	NaN	NaN	NaN	NaN	NaN	NaN	S	2			0.980216	1.91172e-05	124.45	98.451	85.518	-0.21888	158020000	116930000	41081000	136
1.0809	0.32315	0.2498	NaN	NaN	NaN	NaN	NaN	NaN	NaN	NaN	NaN	NaN	NaN	NaN	NaN	NaN	NaN	NaN	0.3812	NaN	NaN	NaN	NaN	NaN	NaN	NaN	NaN	NaN	NaN	NaN	NaN	NaN	NaN	NaN	NaN	S	3			0.999165	0.00388948	162.93	125.27	162.93	0.10995	76774000	56915000	19859000	159
NaN	NaN	NaN	NaN	NaN	NaN	NaN	NaN	NaN	NaN	NaN	NaN	NaN	NaN	NaN	NaN	NaN	NaN	NaN	NaN	NaN	NaN	NaN	NaN	NaN	NaN	0.68212	NaN	NaN	NaN	NaN	NaN	NaN	NaN	NaN	NaN	S	3			0.751496	0.000212418	59.07	37.177	59.07	-0.43138	6107700	2786600	3321000	2538
NaN	NaN	NaN	NaN	NaN	NaN	NaN	NaN	NaN	NaN	NaN	NaN	NaN	NaN	NaN	NaN	NaN	NaN	NaN	NaN	NaN	NaN	NaN	NaN	NaN	NaN	NaN	NaN	NaN	NaN	NaN	NaN	NaN	NaN	NaN	NaN	S	3			0.76486	0.00147798	57.316	34.107	57.316	-0.11831	3045200	3045200	0	2543
0.93307	0.42022	0.69942	0.4194	0.64378	0.78684	0.43237	0.84972	0.63083	0.56595	0.58945	NaN	0.55079	0.51379	NaN	0.57963	0.29918	0.24993	1.2205	0.85456	0.72998	0.57718	0.42922	0.28282	0.4769	0.54618	0.45361	0.3988	0.54535	0.58331	0.25168	0.41495	0.37329	0.2207	0.39361	0.23571	S	3			1	0.000206924	260.08	194.43	144.77	0.20163	589440000	371750000	217690000	1127
1.0073	NaN	0.69942	0.4194	0.64378	NaN	NaN	0.84972	0.63083	0.56595	0.58945	NaN	0.55079	NaN	NaN	0.57963	0.29918	0.24993	1.2205	NaN	0.72998	0.57718	0.42922	NaN	0.4769	0.54618	0.45361	0.3988	0.54535	0.58331	0.25168	0.41495	0.37329	0.2207	0.39361	0.23571	S	3			0.999933	0.000618355	260.08	194.43	260.08	0.096493	446370000	280710000	165660000	1136
0.86429	0.42022	0.69942	NaN	NaN	0.78684	0.43237	NaN	NaN	NaN	NaN	NaN	NaN	0.51379	NaN	NaN	0.29918	NaN	NaN	0.85456	NaN	NaN	NaN	0.28282	NaN	NaN	NaN	NaN	NaN	NaN	0.25168	NaN	NaN	NaN	NaN	NaN	S	3			0.997151	0.000206924	236.42	185.45	214.48	0.41122	226260000	139520000	86742000	1138
0.93531	0.53755	0.52073	0.60017	0.6134	0.64262	0.54779	NaN	0.69098	0.59174	0.55092	0.69202	NaN	0.73563	0.71554	NaN	NaN	0.56979	0.88214	0.51025	0.4812	0.58338	0.4064	NaN	NaN	0.55549	0.54794	NaN	0.65443	NaN	0.65377	0.5623	0.57738	0.62212	0.64227	0.67549	S	2			0.9998	2.33275e-05	125.97	82.552	107.09	0.32129	1162600000	750700000	411880000	464
NaN	NaN	NaN	NaN	NaN	NaN	NaN	NaN	NaN	NaN	NaN	NaN	NaN	NaN	NaN	NaN	NaN	NaN	NaN	NaN	NaN	NaN	NaN	0.92269	NaN	NaN	0.82911	1.0279	NaN	NaN	1.0198	1.0874	NaN	0.88881	NaN	NaN	S	3			0.999686	0.000313429	140.33	109.9	109.39	-1.5962	42879000	25356000	17523000	668
1.1789	NaN	0.8847	NaN	NaN	0.83918	0.81016	0.89563	NaN	NaN	0.61138	NaN	0.57404	NaN	NaN	NaN	NaN	NaN	0.98219	1.1069	0.87576	0.75638	0.53706	NaN	NaN	NaN	NaN	NaN	NaN	NaN	NaN	NaN	NaN	NaN	NaN	NaN	S	2			0.998203	0.00466496	74.475	46.115	67.234	-0.053942	55714000	36475000	19239000	14
NaN	NaN	NaN	NaN	NaN	NaN	NaN	0.56862	NaN	NaN	NaN	NaN	NaN	0.7456	0.91867	0.70311	0.91835	1.275	NaN	NaN	NaN	NaN	NaN	0.98023	NaN	NaN	NaN	NaN	1.2793	1.1935	1.0838	1.2813	1.1507	NaN	NaN	2.2473	S	3			0.994088	0.000630521	156.58	129.04	156.58	-1.0869	66296000	32927000	33369000	505
NaN	NaN	NaN	NaN	NaN	NaN	NaN	0.56862	NaN	NaN	NaN	NaN	NaN	0.7456	0.91867	0.70311	0.91835	1.275	NaN	0.51619	NaN	NaN	NaN	0.79558	NaN	0.85838	NaN	0.73969	1.2793	1.1837	1.0838	1.2813	1.1507	NaN	NaN	1.5894	S	3			1	0.000421383	161.21	106.17	156.58	-1.0869	85608000	43089000	42519000	509
0.91486	0.48646	NaN	NaN	NaN	NaN	NaN	NaN	NaN	NaN	NaN	NaN	NaN	NaN	NaN	NaN	NaN	NaN	NaN	0.66946	NaN	NaN	NaN	NaN	NaN	NaN	NaN	NaN	NaN	NaN	NaN	NaN	NaN	NaN	NaN	NaN	S	4			0.792558	0.00172264	53.748	35.06	51.851	0.10843	91632000	68881000	22751000	459
1.0542	0.90025	0.92111	0.76147	0.86053	0.96926	0.88308	0.97564	0.87431	0.90912	0.71285	0.62366	0.84325	0.66484	0.86466	0.85922	0.51454	0.70886	1.1768	0.73922	1.0014	0.80096	0.64243	0.71093	0.77782	0.83031	0.80415	0.71698	0.93193	0.63512	NaN	0.7117	0.69101	0.56658	0.72483	0.67444	S	3			1	0.000266625	224.15	182.89	180.31	0.16698	1650900000	919230000	731690000	27
NaN	NaN	NaN	NaN	NaN	NaN	NaN	NaN	NaN	NaN	NaN	NaN	NaN	NaN	NaN	NaN	NaN	NaN	NaN	NaN	NaN	NaN	NaN	NaN	NaN	NaN	NaN	NaN	NaN	NaN	NaN	NaN	NaN	NaN	NaN	NaN	S	3			0.678868	5.01151e-05	68.961	56.128	68.961	-0.23931	16248000	16248000	0	126
NaN	NaN	NaN	NaN	NaN	NaN	NaN	NaN	NaN	NaN	NaN	NaN	NaN	NaN	NaN	NaN	NaN	NaN	NaN	NaN	NaN	NaN	NaN	NaN	0.96411	NaN	0.87352	0.82758	NaN	NaN	NaN	NaN	NaN	NaN	NaN	NaN	S	4			0.975599	6.50809e-05	59.083	59.083	53.679	0.51437	413470000	307500000	105970000	128
NaN	NaN	NaN	NaN	NaN	NaN	NaN	NaN	NaN	NaN	NaN	NaN	NaN	NaN	NaN	NaN	NaN	NaN	NaN	NaN	NaN	NaN	NaN	NaN	0.96411	NaN	0.87352	0.82758	NaN	NaN	NaN	NaN	NaN	NaN	NaN	NaN	S	3			0.999975	5.01151e-05	68.961	56.128	58.47	0.41406	450900000	344930000	105970000	136
1.0503	0.6231	0.76148	0.7657	0.58869	0.68675	0.49107	0.80022	0.79285	0.47486	0.51433	0.27821	0.13811	0.14204	0.10025	0.082803	0.068586	0.063492	1.1063	0.8128	0.55935	0.64292	0.71476	0.7398	0.6438	0.63429	0.54403	0.53246	0.65758	0.3305	0.34872	0.24423	0.16818	0.23601	0.13807	0.037285	S	3			0.998891	7.46079e-45	200.33	130.18	179.83	-0.12166	6388700000	4078000000	2310700000	285
NaN	NaN	NaN	NaN	NaN	NaN	NaN	NaN	NaN	NaN	NaN	NaN	NaN	NaN	NaN	NaN	NaN	NaN	NaN	NaN	NaN	NaN	NaN	NaN	NaN	NaN	NaN	NaN	NaN	NaN	NaN	NaN	NaN	NaN	NaN	NaN	S	3			0.435072	1.73349e-06	72.228	55.763	63.713	0.32341	0	0	0	420
1.0023	0.42929	0.25979	0.11399	0.092191	0.060347	0.037962	0.047661	0.032421	NaN	0.013325	NaN	NaN	NaN	NaN	NaN	NaN	NaN	1.0139	0.44188	0.24713	0.14724	0.067652	0.043737	0.053219	0.039817	NaN	0.022507	NaN	0.50738	NaN	NaN	NaN	NaN	NaN	NaN	S	3			1	6.69773e-11	319.37	247.83	222.81	-0.193	3465500000	2685400000	780160000	172
NaN	NaN	NaN	NaN	1.3479	NaN	NaN	NaN	NaN	NaN	NaN	NaN	NaN	NaN	NaN	NaN	NaN	NaN	NaN	NaN	NaN	NaN	NaN	NaN	NaN	NaN	NaN	NaN	NaN	NaN	NaN	NaN	NaN	NaN	NaN	NaN	S	4			0.968904	0.00621639	43.349	30.327	43.349	0.253	32654000	18218000	14436000	114
NaN	NaN	NaN	NaN	NaN	NaN	NaN	NaN	NaN	NaN	NaN	NaN	NaN	NaN	NaN	NaN	NaN	NaN	NaN	NaN	1.0577	NaN	0.79644	NaN	NaN	0.63042	NaN	NaN	NaN	NaN	NaN	NaN	NaN	NaN	NaN	NaN	S	4			0.794772	4.79951e-05	75.91	61.644	56.819	-0.66975	62036000	47391000	14646000	347
NaN	NaN	NaN	NaN	NaN	NaN	NaN	NaN	NaN	NaN	NaN	NaN	NaN	NaN	NaN	NaN	NaN	NaN	NaN	0.95486	1.2178	0.72181	NaN	NaN	NaN	NaN	NaN	NaN	NaN	NaN	NaN	NaN	NaN	NaN	NaN	NaN	S	4			0.80327	0.0044332	80.002	54.394	80.002	-0.31116	135780000	81065000	54720000	350
NaN	NaN	NaN	NaN	NaN	NaN	NaN	NaN	NaN	NaN	NaN	NaN	NaN	NaN	NaN	NaN	NaN	NaN	NaN	NaN	NaN	NaN	NaN	NaN	0.74981	NaN	NaN	NaN	NaN	NaN	NaN	NaN	NaN	NaN	NaN	NaN	S	2			0.881014	1.89759e-12	152.03	142.23	152.03	0.093673	5649200	3164300	2484900	104
1.0401	0.72296	0.72149	0.7184	0.72881	0.63335	0.54346	0.94059	0.71851	0.45174	0.69347	0.76672	0.79239	0.82877	0.7615	0.58794	0.65732	0.45984	1.0783	0.697	0.51298	0.62831	0.65824	0.72994	0.64915	0.64529	0.63102	0.604	0.88233	0.67754	0.72504	0.66182	0.76259	0.62389	0.65911	0.64891	S	2			1	5.05233e-92	287	258.95	233.8	-0.0086037	1002100000	562570000	439480000	106
0.95891	0.85463	0.73649	0.71802	0.8026	0.73966	0.64605	0.98516	0.80966	0.60059	0.65772	0.71932	0.7846	0.80785	0.69962	0.81529	0.72566	0.79296	1.1111	0.71439	0.70767	0.75274	0.63999	0.73205	0.67207	0.93556	0.7523	0.64544	0.71024	0.76225	0.76354	0.74638	0.78882	0.76069	0.73897	0.86032	S	3			1	4.39897e-35	257.2	194.4	244.58	-0.028806	1312600000	730820000	581760000	241
NaN	NaN	NaN	NaN	NaN	NaN	NaN	NaN	NaN	NaN	NaN	0.52289	NaN	0.31043	NaN	NaN	NaN	NaN	NaN	NaN	NaN	0.672	NaN	NaN	NaN	NaN	NaN	NaN	0.86543	NaN	NaN	0.32525	NaN	NaN	NaN	NaN	S	2			0.785806	7.67102e-06	123.61	94.482	79.695	-0.084175	48374000	30779000	17595000	36
1.1563	0.71776	0.49547	0.58781	0.66189	NaN	NaN	NaN	0.55304	0.57086	NaN	0.59427	NaN	0.5613	0.58709	0.52766	NaN	NaN	1.1818	0.61837	0.88866	0.47515	0.44107	0.41191	0.4591	0.41264	0.40571	0.5152	0.50224	0.6129	0.31294	0.41494	0.46721	0.41258	0.44314	0.49532	S	2			0.998834	9.47206e-08	99.603	66.806	77.995	-0.95507	2899500000	1831100000	1068400000	84
1.1563	0.71776	0.49547	0.58781	0.74366	NaN	NaN	NaN	0.55304	0.57086	NaN	0.59427	NaN	0.5613	0.58709	0.52766	NaN	NaN	1.1818	0.61837	0.88866	0.47515	0.44107	0.41191	0.4591	0.41264	0.40571	0.5152	0.50224	0.6129	0.31294	0.41494	0.46721	0.41258	0.44314	0.49532	S	2			0.999692	9.47206e-08	99.603	66.806	80.721	0.04452	2899500000	1831100000	1068400000	85
NaN	0.94725	0.83177	0.73026	NaN	0.76164	NaN	NaN	NaN	NaN	NaN	0.9956	1.4906	1.1236	NaN	NaN	NaN	NaN	NaN	NaN	NaN	NaN	NaN	0.96933	0.99267	NaN	NaN	NaN	NaN	NaN	NaN	NaN	NaN	NaN	NaN	NaN	S	2			0.999999	7.997e-07	119.35	89.787	119.35	0.27393	188110000	92567000	95542000	253
NaN	NaN	NaN	NaN	NaN	NaN	NaN	NaN	NaN	NaN	NaN	NaN	NaN	NaN	NaN	NaN	NaN	NaN	NaN	NaN	NaN	NaN	NaN	NaN	NaN	NaN	NaN	NaN	NaN	NaN	NaN	NaN	NaN	NaN	NaN	NaN	S	3			0.999891	0.00134713	237.44	154.79	223.36	-0.33441	24523000	21105000	3418500	15
0.99733	0.72316	0.59346	0.69136	0.72671	0.65616	0.68246	0.69671	0.81327	0.56961	0.64822	0.81516	0.67828	0.65811	0.84011	0.6605	0.60735	0.5971	1.1543	0.63647	0.71675	0.69022	0.72411	0.65304	0.65887	0.65634	0.58157	0.50154	0.77313	0.56693	0.72185	0.56314	0.55705	0.50064	0.49661	0.74027	S	3			1	0.000806833	218.68	134.38	192.44	-0.42488	372860000	214040000	158820000	240
NaN	0.78965	0.53406	NaN	NaN	NaN	0.65534	NaN	0.99615	NaN	0.76034	NaN	NaN	NaN	NaN	NaN	NaN	NaN	NaN	NaN	NaN	NaN	NaN	NaN	NaN	NaN	NaN	NaN	NaN	NaN	NaN	NaN	NaN	0.29958	NaN	NaN	S	4			0.984899	0.00128648	48.607	38.512	47.286	0.43546	128190000	93758000	34433000	1509
NaN	0.78965	0.53406	NaN	NaN	NaN	0.65534	NaN	0.99615	NaN	0.76034	NaN	NaN	NaN	NaN	NaN	NaN	NaN	NaN	NaN	NaN	NaN	NaN	NaN	NaN	NaN	NaN	NaN	NaN	NaN	NaN	NaN	NaN	0.29958	NaN	NaN	S	4			0.926812	0.00128648	48.607	38.512	48.607	0.12298	87744000	53311000	34433000	1518
NaN	NaN	NaN	NaN	NaN	NaN	NaN	NaN	NaN	NaN	NaN	NaN	NaN	NaN	NaN	NaN	NaN	NaN	NaN	NaN	NaN	NaN	NaN	NaN	NaN	NaN	NaN	NaN	NaN	NaN	NaN	NaN	NaN	NaN	NaN	NaN	S	4			0.46688	0.00128648	48.607	38.512	40.067	0.16665	0	0	0	1520
0.84283	0.83324	0.71138	0.65652	0.58485	0.71664	0.64041	0.88754	0.96362	0.65817	0.56516	0.70771	0.78989	0.76029	0.77125	0.77436	0.68252	0.66005	1.0981	0.91307	0.71188	0.91721	0.71412	0.64413	0.77765	0.71821	0.76576	0.71447	0.65047	0.69123	0.77863	0.79886	0.66021	0.65807	0.72296	0.80196	S	2			1	1.14851e-42	365.19	331.14	127.01	-0.088936	1262100000	697680000	564420000	701
NaN	NaN	NaN	NaN	NaN	1.1887	NaN	NaN	NaN	NaN	0.84805	NaN	NaN	NaN	NaN	NaN	NaN	NaN	NaN	NaN	NaN	NaN	NaN	NaN	NaN	NaN	0.8192	NaN	1.1134	NaN	NaN	1.0217	0.67808	NaN	NaN	NaN	S	3			0.870541	9.76168e-05	65.438	45.953	48.51	-0.1045	124860000	63716000	61146000	58
1.005	0.66142	0.45621	0.65923	0.85531	0.661	0.62196	0.69829	0.77057	0.63137	0.55031	0.85517	0.82595	0.79272	0.74454	0.89889	0.75193	0.62869	1.0088	0.69672	1.4114	0.9736	0.75729	0.59449	0.65408	0.63875	0.50192	0.65301	0.74711	0.98356	0.69848	0.9221	0.58755	0.67058	0.50407	0.70054	S	3			0.999905	1.18518e-16	130.3	99.59	130.3	-0.55452	6454300000	3847300000	2607000000	62
1.005	0.66142	0.45621	0.65923	0.85531	0.661	0.62196	0.69829	0.77057	0.63137	0.58989	0.85517	0.82595	0.79272	0.74454	0.89889	0.75193	0.62869	1.2211	0.69196	1.4114	0.7782	0.75729	0.65117	0.71743	0.59399	0.58236	0.71384	0.74711	1.0167	0.53336	0.86172	0.58755	0.6375	0.51895	0.65731	S	3			0.999999	1.18518e-16	130.3	99.59	130.3	-0.55452	6516800000	3879700000	2637100000	64
1.1399	0.87793	0.78943	0.81565	0.89764	0.83284	1.0283	NaN	1.0355	1.1413	0.90665	NaN	0.79423	NaN	NaN	0.69832	0.28219	0.30557	0.89709	0.87935	1.3066	0.92032	0.71962	NaN	0.96165	0.83723	0.8035	NaN	0.95852	1.2002	0.53701	NaN	0.44045	0.33835	NaN	0.37893	S	3			0.997729	3.42211e-05	78.419	65.341	75.057	-0.29271	565370000	282490000	282880000	171
1.2454	0.87793	0.86747	NaN	0.86742	NaN	NaN	NaN	NaN	0.93704	NaN	NaN	0.87532	NaN	NaN	NaN	NaN	0.30557	NaN	NaN	1.3066	1.0109	0.71962	NaN	NaN	0.83723	NaN	NaN	NaN	NaN	NaN	NaN	NaN	NaN	NaN	NaN	S	4			0.918449	0.000258091	68.291	45.083	52.464	-0.1991	79460000	37184000	42276000	174
1.2583	0.87793	0.71842	0.7361	0.9289	0.83284	1.5145	0.95378	1.0355	1.1413	0.90665	NaN	2.8621	0.63945	3.7906	NaN	2.5046	4.3596	1.054	1.4444	1.7446	0.83785	0.64903	0.72231	0.96165	NaN	0.8035	0.81904	NaN	1.2002	NaN	0.77512	NaN	0.33835	0.54448	3.8817	S	4			0.91555	1.20216e-06	106.62	62.855	55.871	-0.036138	622130000	276530000	345600000	176
NaN	NaN	NaN	NaN	NaN	0.80651	NaN	NaN	NaN	NaN	1.1275	NaN	NaN	0.64419	NaN	NaN	0.42297	NaN	NaN	0.93663	NaN	0.70289	0.72555	0.84862	0.80125	0.75242	NaN	NaN	NaN	NaN	NaN	NaN	NaN	0.48931	NaN	0.44052	S	2			0.898093	1.48755e-05	123.4	76.648	93.342	-0.30022	161090000	97498000	63589000	124
0.90564	0.80913	NaN	NaN	NaN	NaN	NaN	1.056	0.84071	0.71504	NaN	0.66972	0.67702	0.64419	0.52062	0.46768	NaN	NaN	1.1761	NaN	0.70436	NaN	NaN	NaN	NaN	0.75242	NaN	NaN	0.89919	NaN	NaN	NaN	NaN	NaN	0.45269	NaN	S	2			0.991422	3.11414e-06	127.49	90.863	127.49	0.10682	160090000	96666000	63422000	126
2.103	1.245	1.1777	1.1642	1.1972	1.1462	0.97147	1.3331	1.3351	0.88593	0.84194	1.2451	1.1564	1.167	1.2226	1.042	1.1504	0.95946	NaN	NaN	1.3297	NaN	1.0784	NaN	NaN	0.99347	NaN	NaN	1.0212	0.89869	0.95872	0.92235	0.74565	0.8728	0.89333	0.86772	S	2			1	3.58972e-05	217.46	159.42	77.1	-0.088289	299260000	147540000	151720000	104
2.103	1.245	1.1777	1.1642	1.1972	1.1462	0.97147	1.3331	1.3351	0.88593	0.84194	1.2451	1.1564	1.167	1.2226	1.042	1.1504	0.95946	NaN	NaN	1.3297	NaN	1.0784	NaN	NaN	0.99347	NaN	NaN	1.0212	0.89869	0.95872	0.92235	0.74565	0.8728	0.89333	0.86772	S	2			1	3.58972e-05	217.46	159.42	77.1	-0.088289	299260000	147540000	151720000	106
1.0257	0.73004	0.74045	0.65789	0.70821	0.76982	0.58314	0.90472	0.80285	0.63745	0.6309	0.69837	0.74305	0.61843	0.68868	0.59539	0.50575	0.49637	1.0109	NaN	0.55377	0.67792	0.68562	0.65934	0.63075	0.61938	0.66899	0.65007	0.82894	0.58597	0.67366	0.62725	0.56637	0.54535	0.56746	0.56305	S	2			1	0.000735269	123.79	72.457	114.89	0.17803	634160000	367660000	266500000	223
0.75285	NaN	1.0334	NaN	0.86219	1.1542	0.69145	1.1416	0.92753	0.44131	0.67961	NaN	NaN	0.79526	0.57801	0.3998	0.28827	0.33067	1.1816	0.90934	1.3629	0.77312	0.93447	0.88363	0.89267	NaN	0.83793	0.79321	NaN	NaN	NaN	0.73473	NaN	NaN	NaN	0.45139	S	3			0.986706	0.000266625	220.78	151.7	194.98	0.26453	342830000	186530000	156290000	19
0.94233	0.94036	0.90589	0.97654	0.95455	1.1793	0.9191	1.1709	0.98138	1.054	0.80234	0.98421	0.98295	1.0769	1.0322	1.1456	0.93214	1.4132	1.071	1.0617	0.99071	0.96372	0.98862	0.95437	0.8115	0.88776	0.84042	1.0839	1.0041	0.81609	0.87384	0.86175	0.84646	0.80179	1.0197	0.87123	S	3			1	3.44237e-18	332.96	290.57	321.84	0.32932	2277600000	1167300000	1110300000	326
NaN	NaN	NaN	NaN	NaN	NaN	NaN	NaN	NaN	NaN	NaN	NaN	NaN	NaN	NaN	NaN	NaN	NaN	NaN	NaN	NaN	NaN	NaN	NaN	NaN	NaN	NaN	NaN	NaN	NaN	NaN	NaN	NaN	NaN	NaN	NaN	S	3			0.978256	0.000890257	86.699	54.222	84.297	-0.49576	37173000	26707000	10465000	20
0.95954	0.63059	NaN	NaN	NaN	0.58639	0.43889	0.79904	NaN	0.15098	NaN	0.21417	NaN	0.14236	NaN	NaN	NaN	NaN	NaN	NaN	NaN	NaN	NaN	0.79368	NaN	NaN	NaN	NaN	NaN	NaN	NaN	NaN	NaN	NaN	NaN	NaN	S	3			0.73505	0.00341389	58.864	38.425	44.788	0.15196	120450000	78223000	42228000	381
0.95954	0.63059	0.55706	0.68466	0.56614	0.51262	0.43889	0.7017	0.71133	0.58972	0.39351	0.21417	NaN	NaN	NaN	NaN	NaN	NaN	NaN	NaN	NaN	NaN	NaN	NaN	NaN	NaN	NaN	NaN	NaN	NaN	NaN	NaN	NaN	NaN	NaN	NaN	S	3			0.948404	0.00341389	65.817	40.915	58.864	-0.10104	301120000	191570000	109550000	383
0.95954	0.63059	0.55706	0.62369	NaN	0.58639	0.43889	0.79904	NaN	0.15098	NaN	0.21417	NaN	0.14236	NaN	NaN	NaN	NaN	NaN	NaN	NaN	NaN	NaN	NaN	0.59739	0.44237	0.386	0.48877	0.41734	NaN	NaN	NaN	NaN	NaN	NaN	NaN	S	3			0.770119	0.00341389	65.817	40.915	54.253	-0.34672	197840000	136350000	61497000	389
0.95954	0.63059	0.55706	0.68466	0.56614	0.51262	0.43889	0.7017	0.71133	0.58972	0.39351	0.21417	NaN	NaN	NaN	NaN	NaN	NaN	NaN	NaN	NaN	NaN	NaN	NaN	NaN	NaN	NaN	NaN	NaN	NaN	NaN	NaN	NaN	NaN	NaN	NaN	S	2			0.774511	0.00341389	62.847	35.749	62.847	-0.17171	296970000	184750000	112220000	391
0.83464	0.70617	0.92393	0.66448	0.70411	0.72069	0.65006	1.0158	0.87	0.76426	0.7639	0.67042	0.67305	0.75251	0.74033	0.7259	0.77832	0.63525	1.0726	0.96873	0.8129	0.70688	0.71521	0.67492	0.6944	0.74056	0.67368	0.62312	0.70628	0.68026	0.76806	0.65858	0.63163	0.71391	0.82312	0.85098	S	3			1	2.11648e-18	157.38	122.54	83.894	-0.31584	7480100000	4032000000	3448200000	194
NaN	NaN	NaN	NaN	NaN	NaN	NaN	NaN	NaN	NaN	NaN	NaN	NaN	NaN	NaN	NaN	NaN	NaN	NaN	NaN	NaN	NaN	NaN	NaN	NaN	NaN	0.64553	NaN	NaN	NaN	NaN	NaN	NaN	NaN	NaN	NaN	S	2			0.741199	6.37167e-06	124.84	83.617	94.845	-0.17606	163990000	101080000	62909000	405
NaN	NaN	NaN	NaN	NaN	NaN	NaN	NaN	0.75885	NaN	NaN	NaN	NaN	NaN	0.082753	NaN	NaN	NaN	NaN	NaN	NaN	NaN	NaN	NaN	NaN	NaN	NaN	NaN	NaN	NaN	NaN	NaN	NaN	NaN	NaN	NaN	S	2			0.63622	1.79797e-07	131.67	94.489	110.56	-0.40341	255230000	183320000	71911000	406
1.0381	NaN	NaN	NaN	0.76119	0.75853	0.60802	0.87689	NaN	NaN	NaN	NaN	NaN	NaN	NaN	NaN	NaN	0.0582	1.0954	NaN	NaN	NaN	NaN	NaN	NaN	NaN	NaN	NaN	NaN	NaN	NaN	NaN	NaN	NaN	NaN	NaN	S	2			0.741454	1.79797e-07	131.67	94.489	117.65	-0.29985	1121700000	647810000	473860000	407
NaN	NaN	NaN	NaN	NaN	NaN	NaN	NaN	NaN	NaN	NaN	NaN	NaN	NaN	NaN	NaN	NaN	NaN	NaN	NaN	0.62355	NaN	NaN	NaN	NaN	NaN	NaN	NaN	NaN	NaN	NaN	NaN	NaN	0.11815	NaN	NaN	S	2			0.669281	4.77144e-05	104.88	65.871	92.39	-0.19984	259900000	194510000	65384000	411
0.95265	0.48144	0.46891	0.70767	0.80176	0.68701	0.71582	1.1417	1.2122	0.43358	1.0277	0.80184	0.22686	NaN	NaN	0.12518	0.17909	0.14596	1.0651	0.51299	0.80693	0.54811	0.14868	0.63798	0.37621	0.33467	0.31925	0.29451	0.27535	0.7253	0.1373	0.043593	NaN	0.21357	0.063109	0.081108	S	3			1	5.0018e-09	270.93	229.82	234.87	0.16236	1594700000	1237700000	357080000	443
1.0207	0.64555	0.74854	0.42835	0.45322	0.48155	0.40598	0.45173	0.39762	0.76554	0.25438	0.068936	NaN	NaN	NaN	NaN	NaN	NaN	0.96825	0.70404	0.51662	0.64857	0.85081	0.30062	0.40141	0.33467	0.30512	0.29451	0.27535	0.14412	0.1373	0.24294	0.066877	0.086608	0.19629	0.081108	S	2			1	5.0018e-09	270.93	229.82	142.89	0.1134	1726700000	1333600000	393140000	446
NaN	NaN	NaN	NaN	NaN	NaN	NaN	NaN	NaN	NaN	NaN	NaN	NaN	NaN	0.49953	NaN	NaN	0.49016	NaN	NaN	NaN	NaN	NaN	NaN	NaN	0.7755	NaN	NaN	NaN	NaN	NaN	NaN	NaN	NaN	NaN	NaN	S	2			1	0.00465946	67.252	13.304	61.419	-0.60351	18044000	11606000	6438300	226
NaN	NaN	NaN	NaN	NaN	NaN	NaN	NaN	NaN	NaN	NaN	NaN	NaN	NaN	NaN	NaN	NaN	NaN	NaN	NaN	NaN	NaN	NaN	0.70978	0.61675	0.49669	0.66519	0.51841	0.6058	NaN	NaN	NaN	NaN	NaN	NaN	NaN	S	3			1	0.000624775	238.2	123.99	121.95	-0.15571	65054000	49976000	15078000	521
NaN	NaN	NaN	NaN	NaN	NaN	NaN	NaN	0.82568	NaN	NaN	NaN	NaN	NaN	NaN	NaN	NaN	NaN	NaN	NaN	NaN	NaN	NaN	NaN	1.1667	NaN	NaN	0.95282	1.0718	NaN	NaN	NaN	0.71099	NaN	NaN	NaN	S	3			0.808923	0.000931181	57.238	31.243	44.625	-0.12692	46785000	23353000	23432000	591
0.9074	NaN	0.88948	0.72502	NaN	1.0367	0.666	NaN	NaN	NaN	NaN	NaN	0.98978	NaN	NaN	NaN	NaN	0.71743	NaN	NaN	NaN	NaN	NaN	NaN	1.1667	0.75498	NaN	0.95282	1.0718	0.94352	NaN	0.88859	0.71099	0.82334	0.76219	NaN	S	3			0.904474	0.000102281	67.552	40.349	67.552	-0.13445	164210000	88430000	75780000	596
0.9074	NaN	0.88948	0.72502	NaN	1.0367	0.666	NaN	0.82568	NaN	NaN	NaN	0.98978	NaN	NaN	NaN	NaN	0.71743	NaN	NaN	NaN	NaN	NaN	NaN	NaN	0.75498	NaN	0.95282	1.0718	0.94352	NaN	0.88859	0.71099	0.82334	0.76219	NaN	S	3			0.960724	0.000102281	67.552	40.349	67.552	-0.13445	168170000	92053000	76119000	598
NaN	NaN	NaN	NaN	0.73481	NaN	NaN	0.66509	0.66223	NaN	NaN	NaN	NaN	NaN	NaN	NaN	NaN	NaN	1.1561	NaN	0.78436	NaN	0.35241	NaN	NaN	NaN	NaN	NaN	NaN	NaN	NaN	NaN	NaN	NaN	NaN	NaN	S	2			0.761087	4.83973e-07	133.15	81.712	133.15	-0.16136	48257000	32100000	16157000	22
NaN	NaN	0.81037	NaN	NaN	NaN	NaN	NaN	NaN	NaN	0.48108	NaN	NaN	NaN	NaN	NaN	NaN	NaN	NaN	NaN	NaN	NaN	NaN	0.68362	NaN	0.7344	0.59715	NaN	0.65978	NaN	NaN	NaN	NaN	NaN	NaN	NaN	S	2			0.979239	1.8888e-15	154.81	95.587	154.81	0.52519	62491000	48007000	14484000	23
NaN	NaN	NaN	NaN	NaN	NaN	NaN	NaN	NaN	NaN	NaN	NaN	NaN	NaN	NaN	NaN	NaN	NaN	NaN	NaN	NaN	NaN	NaN	NaN	NaN	NaN	NaN	NaN	NaN	NaN	NaN	NaN	NaN	NaN	NaN	0.51243	S	2			0.828352	0.00225952	71.879	51.146	71.879	0.21834	7991600	5954400	2037200	54
NaN	NaN	NaN	NaN	NaN	NaN	NaN	NaN	NaN	NaN	NaN	NaN	NaN	NaN	NaN	1.6096	NaN	NaN	NaN	NaN	NaN	NaN	NaN	NaN	NaN	NaN	NaN	NaN	NaN	NaN	NaN	NaN	NaN	NaN	NaN	NaN	S	4			0.659767	0.00412495	41.214	26.151	41.214	-0.41456	21266000	7756000	13510000	293
1.0131	1.1933	1.0413	0.76122	1.0085	1.074	NaN	0.9961	NaN	NaN	0.93214	0.63415	1.3226	NaN	NaN	NaN	0.54225	0.98184	NaN	0.83483	2.176	NaN	NaN	NaN	NaN	NaN	NaN	NaN	NaN	NaN	NaN	NaN	NaN	NaN	NaN	NaN	S	3			0.927085	0.001427	53.777	39.363	53.777	0.57764	202800000	104350000	98455000	299
1.0018	0.8763	0.98169	0.74424	0.79662	0.75235	0.78871	0.93506	0.74868	0.82993	NaN	0.55446	0.307	0.31554	0.26259	0.10048	NaN	NaN	1.0342	0.74189	0.75232	0.51491	NaN	0.57803	0.71146	0.7491	0.65562	0.66172	0.88401	0.48229	NaN	NaN	0.18671	0.14422	NaN	NaN	S	3			0.99999	5.83772e-25	308	221.22	253.76	0.14489	383060000	244070000	138990000	1172
NaN	NaN	NaN	1.4237	1.7868	NaN	2.4604	NaN	2.771	1.7756	2.1142	2.4674	2.4532	NaN	NaN	3.272	2.7192	2.4879	NaN	1.0497	2.7549	NaN	NaN	NaN	NaN	1.7417	2.0905	2.1388	NaN	4.8942	2.0454	2.579	2.4002	3.0626	2.716	2.9492	S	3			0.999462	0.000142835	86.189	70.296	84.249	-0.50551	183090000	56219000	126870000	439
0.90062	NaN	NaN	NaN	NaN	NaN	NaN	NaN	NaN	NaN	0.38935	NaN	NaN	NaN	NaN	NaN	NaN	NaN	NaN	NaN	NaN	NaN	NaN	NaN	NaN	NaN	NaN	NaN	NaN	NaN	NaN	NaN	NaN	NaN	NaN	NaN	S	3			0.640566	0.000584486	55.844	41.272	45.363	-0.14024	71380000	44160000	27220000	529
NaN	NaN	NaN	NaN	NaN	NaN	NaN	NaN	NaN	NaN	NaN	NaN	NaN	NaN	NaN	NaN	NaN	NaN	NaN	NaN	NaN	NaN	NaN	0.67563	NaN	NaN	NaN	0.52737	0.63398	NaN	NaN	NaN	NaN	NaN	NaN	NaN	S	3			0.789887	0.00412854	46.971	30.378	46.971	0.13451	15345000	9188100	6156500	531
1.0499	NaN	NaN	NaN	NaN	NaN	NaN	NaN	0.60044	NaN	NaN	0.5493	NaN	NaN	NaN	NaN	NaN	NaN	NaN	NaN	0.81727	0.69198	0.8413	NaN	NaN	NaN	NaN	NaN	NaN	NaN	0.66758	NaN	NaN	0.48436	NaN	NaN	S	3			0.999995	0.000256126	180.7	149.74	180.7	-0.28966	501950000	227120000	274830000	1144
0.83985	0.8343	0.67583	NaN	NaN	0.58426	0.50589	NaN	NaN	0.53301	0.48646	NaN	NaN	NaN	NaN	NaN	NaN	NaN	NaN	NaN	0.81099	NaN	0.39518	NaN	NaN	NaN	NaN	NaN	NaN	NaN	NaN	NaN	NaN	NaN	NaN	NaN	S	2			0.99948	1.98649e-23	167.89	122.55	154.65	0.26796	72973000	51028000	21946000	974
NaN	NaN	0.7296	NaN	NaN	NaN	NaN	NaN	0.9728	NaN	NaN	0.82733	NaN	NaN	NaN	NaN	0.9418	NaN	NaN	NaN	NaN	NaN	NaN	NaN	NaN	NaN	NaN	NaN	NaN	NaN	NaN	NaN	NaN	NaN	NaN	NaN	S	2			0.569008	9.85723e-05	100.58	78.16	100.58	-0.018272	20401000	10290000	10111000	32
NaN	NaN	NaN	NaN	NaN	NaN	NaN	NaN	NaN	NaN	NaN	NaN	0.85908	0.83575	0.91395	0.81	NaN	NaN	NaN	NaN	NaN	NaN	NaN	NaN	NaN	NaN	NaN	NaN	NaN	NaN	NaN	NaN	NaN	NaN	NaN	NaN	S	2			0.991409	0.00074221	77.795	54.94	77.795	-0.17819	24277000	12323000	11954000	33
NaN	NaN	NaN	NaN	NaN	NaN	NaN	NaN	NaN	NaN	NaN	NaN	NaN	NaN	NaN	NaN	NaN	NaN	NaN	NaN	NaN	NaN	NaN	NaN	NaN	NaN	NaN	NaN	NaN	NaN	NaN	NaN	NaN	NaN	NaN	NaN	S	2			0.716277	0.000196112	106.93	58.713	106.93	-0.24778	3858600	3858600	0	1100
0.80421	0.43451	NaN	NaN	NaN	NaN	NaN	NaN	NaN	NaN	NaN	NaN	NaN	NaN	NaN	NaN	NaN	NaN	NaN	0.34625	NaN	NaN	NaN	NaN	NaN	NaN	NaN	NaN	NaN	NaN	NaN	NaN	NaN	NaN	NaN	NaN	S	2			0.986209	1.04811e-05	119.62	80.193	119.62	-0.0017447	31301000	25786000	5515000	1101
0.7941	0.87519	0.93498	0.84271	0.77883	0.99381	0.9084	1.2222	1.0101	0.94515	0.8319	1.0314	NaN	NaN	NaN	NaN	NaN	NaN	NaN	0.90658	0.9906	1.086	0.96764	NaN	NaN	NaN	NaN	NaN	NaN	1.1315	0.8099	0.70874	NaN	0.48941	1.0863	0.62967	S	3			0.990397	0.00174027	137.62	98.63	81.676	-0.15606	121000000	62918000	58077000	49
NaN	NaN	NaN	NaN	NaN	NaN	NaN	NaN	NaN	NaN	0.87166	NaN	NaN	NaN	NaN	NaN	0.33763	0.37623	NaN	NaN	NaN	NaN	NaN	NaN	NaN	NaN	NaN	NaN	NaN	NaN	NaN	NaN	NaN	NaN	NaN	NaN	S	3			0.945706	0.00190028	109.95	59.867	109.95	-0.088201	12570000	8394800	4175300	52
1.1795	0.77621	0.75278	0.5912	0.70718	1.0028	0.70954	0.94544	0.71506	0.75363	0.73063	0.61275	0.89284	0.82785	0.67084	0.74203	0.66591	0.58683	1.1419	0.78707	0.69294	0.71899	0.58562	0.77498	0.89573	0.69466	0.77082	0.80153	NaN	0.61684	NaN	0.80751	0.72955	0.80865	0.97219	1.0288	S	3			1	0.00012288	271.04	204.8	258.02	-0.10897	345380000	193330000	152050000	501
0.94587	NaN	NaN	NaN	0.87868	NaN	NaN	NaN	NaN	NaN	NaN	NaN	NaN	0.59906	NaN	NaN	NaN	NaN	1.2466	1.1542	NaN	NaN	1.0905	NaN	NaN	1.0165	0.76792	NaN	NaN	0.83669	NaN	NaN	NaN	NaN	NaN	NaN	S	3			0.890655	0.000476323	133.96	111.53	81.128	-0.41073	279720000	138590000	141130000	22
NaN	0.70578	NaN	NaN	NaN	NaN	NaN	NaN	NaN	0.31211	NaN	NaN	NaN	NaN	NaN	NaN	NaN	NaN	NaN	NaN	NaN	NaN	NaN	NaN	NaN	NaN	NaN	NaN	NaN	NaN	NaN	NaN	NaN	NaN	NaN	NaN	S	3			0.743767	9.41159e-08	92.565	75.648	49.765	-0.27413	114770000	82671000	32101000	131
NaN	NaN	NaN	NaN	NaN	NaN	0.26526	NaN	NaN	NaN	NaN	NaN	NaN	NaN	NaN	NaN	NaN	NaN	NaN	NaN	NaN	NaN	0.54441	NaN	NaN	NaN	NaN	NaN	0.67308	NaN	NaN	NaN	NaN	NaN	NaN	NaN	S	3			0.816378	2.675e-06	87.511	64.942	68.445	-0.67565	227020000	212430000	14589000	133
0.9572	NaN	0.963	1.144	NaN	1.1443	NaN	1.6522	1.3692	0.75189	1.0672	NaN	0.42399	0.47889	0.3524	0.42803	NaN	NaN	1.7627	2.1101	NaN	NaN	NaN	NaN	NaN	NaN	NaN	NaN	NaN	NaN	NaN	NaN	NaN	NaN	NaN	NaN	S	2			0.999985	0.000160114	139.86	110.32	103.88	-0.27165	153440000	81440000	71999000	164
0.89212	0.65834	0.8614	0.41511	0.51084	0.95214	0.63834	0.57117	0.57686	0.83525	0.45311	0.19197	0.82157	0.21124	0.84411	1.0388	NaN	0.50963	0.79302	0.38376	1.3562	0.35575	0.13531	NaN	0.59114	0.54226	0.51848	0.3955	0.49901	0.25199	NaN	0.52266	0.40447	NaN	0.46805	NaN	S	3			1	1.44626e-06	120.9	99.454	95.429	-0.058248	2260300000	1356800000	903590000	619
NaN	NaN	NaN	0.63109	NaN	NaN	NaN	NaN	NaN	NaN	NaN	NaN	NaN	NaN	NaN	NaN	NaN	NaN	0.86092	NaN	NaN	NaN	NaN	0.6642	0.52799	NaN	NaN	0.51172	0.56181	NaN	NaN	NaN	NaN	NaN	NaN	NaN	S	2			0.980853	2.74656e-25	171.9	129.9	125.35	-1.0821	591980000	432700000	159270000	19
1.0895	0.7517	0.64759	0.61334	0.6704	0.64391	0.54221	0.76322	0.63681	0.54926	0.59657	0.3868	0.31553	0.4047	0.28413	0.11691	NaN	NaN	1.0614	0.73117	0.65604	0.58776	0.56477	0.49375	0.54831	0.5225	0.48367	0.49786	0.6161	0.3703	0.30117	0.31268	0.25252	0.036609	0.15025	0.13071	S	3			1	2.42987e-46	359.73	302.56	359.73	1.4287	26800000000	17501000000	9298800000	21
NaN	NaN	NaN	0.71556	0.66768	0.56724	0.37968	0.53282	NaN	NaN	NaN	NaN	NaN	NaN	NaN	NaN	NaN	NaN	1.0087	0.95389	0.61548	0.60925	0.64655	1.1909	NaN	NaN	NaN	NaN	NaN	NaN	NaN	NaN	NaN	NaN	NaN	NaN	S	3			1	4.17884e-05	240.8	190.71	228.31	-1.1165	133010000	99054000	33951000	141
NaN	NaN	NaN	NaN	NaN	NaN	NaN	NaN	NaN	NaN	NaN	NaN	NaN	NaN	NaN	NaN	NaN	NaN	NaN	NaN	NaN	NaN	NaN	NaN	NaN	NaN	NaN	NaN	NaN	NaN	NaN	NaN	NaN	NaN	NaN	NaN	S	2			1	5.63196e-36	176.46	145.42	131.37	-0.1474	594790000	594790000	0	12
NaN	NaN	NaN	NaN	NaN	NaN	NaN	NaN	NaN	NaN	NaN	NaN	NaN	NaN	NaN	NaN	NaN	NaN	NaN	NaN	NaN	NaN	NaN	NaN	NaN	NaN	NaN	NaN	NaN	NaN	NaN	NaN	NaN	NaN	NaN	NaN	S	3			0.935952	0.00308576	130.66	88.027	130.66	0.49703	1033400	0	1033400	71
NaN	NaN	NaN	NaN	NaN	NaN	NaN	NaN	NaN	NaN	NaN	NaN	NaN	0.37539	NaN	NaN	NaN	NaN	NaN	NaN	NaN	NaN	NaN	NaN	NaN	NaN	NaN	NaN	NaN	NaN	NaN	NaN	NaN	NaN	NaN	NaN	S	2			0.516463	0.0025399	67.312	38.429	67.312	-0.35247	8530600	5981200	2549400	1341
0.98555	0.88503	NaN	0.84392	0.86176	1.009	0.72855	0.8017	0.95308	0.69649	0.67103	0.6526	0.47354	NaN	0.2645	0.21639	NaN	NaN	0.91794	0.71126	0.77237	0.82581	0.81969	0.95273	0.74849	0.77471	NaN	0.79916	0.83067	0.51664	0.50774	0.41731	NaN	0.17767	NaN	NaN	S	3			0.970111	1.15377e-05	132.14	89.514	132.14	-0.069937	351380000	202850000	148540000	1345
1.0288	NaN	NaN	NaN	NaN	NaN	NaN	NaN	NaN	NaN	NaN	NaN	NaN	NaN	NaN	NaN	NaN	NaN	NaN	NaN	NaN	NaN	NaN	0.67929	0.58968	0.61957	0.60359	NaN	0.58333	0.66024	0.64706	0.44844	0.51363	0.55128	0.44844	NaN	S	2			0.999992	0.000870598	84.31	31.221	84.31	-0.16395	111760000	62484000	49274000	1565
1.2157	0.61009	0.47906	0.45481	0.4882	NaN	0.32635	NaN	0.33312	NaN	NaN	NaN	NaN	NaN	NaN	NaN	NaN	NaN	1.1965	0.69668	0.62084	0.40679	0.58032	NaN	NaN	NaN	NaN	NaN	NaN	NaN	NaN	NaN	NaN	NaN	NaN	NaN	S	3			0.999969	0.00010199	231.62	183.91	231.62	0.16672	236170000	150970000	85191000	1439
NaN	NaN	NaN	NaN	NaN	NaN	NaN	NaN	NaN	NaN	NaN	NaN	NaN	NaN	NaN	NaN	NaN	NaN	NaN	NaN	NaN	NaN	NaN	NaN	NaN	NaN	NaN	NaN	NaN	NaN	NaN	NaN	NaN	NaN	NaN	NaN	S	3			0.499998	0.00010199	164.04	131.74	144.1	0.1018	14330000	14330000	0	1443
1.0634	0.67356	0.70418	0.72253	0.72004	0.79124	0.85181	1.071	1.1805	0.97586	0.66163	0.62172	0.46482	0.57933	0.43311	NaN	NaN	NaN	0.88997	0.70395	1.0698	1.2438	0.86234	NaN	NaN	NaN	NaN	NaN	NaN	NaN	NaN	NaN	NaN	NaN	NaN	NaN	S	3			1	2.66245e-06	256.91	186.72	208.6	0.52713	178690000	101730000	76956000	830
1.2568	0.78806	0.60886	0.79756	0.67252	0.73284	0.81011	0.87934	0.80219	0.69532	0.65443	0.68954	0.6789	0.73636	0.98203	0.51965	0.77489	0.83801	0.85369	1.1779	NaN	0.60007	NaN	NaN	0.77216	NaN	NaN	NaN	1.0638	NaN	1.0801	0.93639	NaN	1.0761	0.93387	1.0282	S	2			0.998492	4.27892e-17	243.85	196.96	146.6	0.19936	299160000	171860000	127290000	1409
NaN	NaN	NaN	NaN	NaN	NaN	0.56586	NaN	NaN	NaN	NaN	NaN	0.67371	1.0223	NaN	0.71329	NaN	NaN	1.4119	NaN	NaN	NaN	1.1878	0.73194	0.7535	1.2273	NaN	0.80623	0.78247	0.7408	NaN	NaN	0.54197	0.9734	0.8264	NaN	S	3			0.996709	9.8657e-24	253.79	209.99	240.6	0.10077	91218000	48528000	42690000	1412
NaN	NaN	NaN	NaN	NaN	NaN	NaN	NaN	NaN	NaN	NaN	NaN	NaN	NaN	NaN	NaN	NaN	NaN	NaN	NaN	NaN	NaN	NaN	0.76166	NaN	NaN	NaN	NaN	NaN	NaN	NaN	NaN	NaN	NaN	NaN	NaN	S	2			0.510462	3.07344e-05	115.88	85.228	115.88	0.34587	12178000	5669600	6508000	1413
1.2223	0.91916	0.84288	1.0949	0.88657	1.1538	0.99485	1.3178	1.0769	1.2425	0.80284	0.80993	NaN	0.83958	1.1532	1.0062	0.64927	1.0622	1.0376	1.1558	1.4626	1.4477	1.0714	0.89686	0.83887	1.1734	0.58345	0.97662	1.3701	0.82934	1.0341	0.90051	0.82751	0.61749	0.84215	1.0034	S	3			1	0.000789258	208.84	173.3	98.182	0.068959	208550000	104020000	104520000	495
1.034	0.82913	0.76881	0.6453	0.70797	0.71337	0.6598	0.89974	0.78017	0.59725	0.6222	0.68181	0.67912	0.61727	0.60555	0.62561	0.33923	0.40506	1.1191	0.76382	0.72026	0.64724	0.47923	0.40059	0.73427	0.67387	0.74039	0.67737	0.69567	0.57177	0.3277	0.54262	0.60372	0.33576	0.41785	NaN	S	3			1	0.000627771	228.49	177.42	203.61	-0.1874	528840000	307950000	220900000	391
NaN	NaN	NaN	NaN	NaN	NaN	NaN	NaN	NaN	NaN	NaN	NaN	NaN	NaN	NaN	NaN	NaN	NaN	NaN	NaN	NaN	NaN	NaN	NaN	NaN	NaN	NaN	NaN	NaN	NaN	NaN	NaN	NaN	NaN	NaN	NaN	S	2			0.724842	7.84745e-07	114.99	74.361	114.99	-1.0606	3007400	3007400	0	246
NaN	NaN	NaN	0.53358	NaN	NaN	NaN	NaN	NaN	NaN	NaN	NaN	NaN	NaN	0.6081	NaN	NaN	NaN	NaN	NaN	NaN	NaN	NaN	NaN	NaN	NaN	NaN	NaN	NaN	NaN	NaN	NaN	NaN	NaN	NaN	NaN	S	3			0.99795	0.00620758	64.843	26.993	64.843	1.365	15140000	11201000	3938900	254
0.97008	0.64315	0.65398	0.65504	0.76084	0.70369	0.54964	0.93557	0.86651	0.48677	0.60708	0.90111	0.70243	1.0558	0.68067	0.6318	1.2585	0.72555	1.0665	0.86816	0.41145	0.69302	1.1113	0.5865	0.79995	0.60949	0.6371	0.73198	0.78081	0.56554	1.2827	0.62726	0.70095	0.74443	0.61071	0.83664	S	2			1	3.06045e-07	184.87	134.52	43.532	1.7919	4996500000	2842000000	2154500000	715
NaN	NaN	NaN	NaN	NaN	NaN	NaN	0.42273	0.63247	NaN	0.67243	NaN	0.72714	NaN	NaN	NaN	NaN	NaN	NaN	NaN	0.5594	NaN	0.27215	NaN	0.84401	1.3574	1.3822	0.71806	0.92857	NaN	NaN	1.1203	1.4776	0.95722	1.4303	1.359	S	2			1	0.000506888	86.005	55.147	43.532	1.7919	104920000	59698000	45225000	718
0.76216	0.7688	0.99979	NaN	NaN	NaN	NaN	NaN	NaN	NaN	NaN	NaN	NaN	NaN	NaN	NaN	NaN	NaN	NaN	NaN	NaN	NaN	NaN	NaN	NaN	NaN	NaN	NaN	NaN	NaN	NaN	NaN	NaN	NaN	NaN	NaN	S	2			0.952886	0.00355059	71.08	46.287	71.08	-0.17358	12587000	6296400	6291000	55
NaN	NaN	NaN	NaN	NaN	NaN	NaN	NaN	NaN	NaN	NaN	NaN	NaN	NaN	NaN	NaN	NaN	NaN	NaN	NaN	NaN	NaN	NaN	NaN	NaN	NaN	NaN	NaN	NaN	NaN	NaN	NaN	NaN	NaN	NaN	NaN	S	2			0.682594	0.00281117	79.467	51.134	79.467	-0.24685	3272200	3272200	0	57
0.91612	0.84569	0.68328	0.67539	0.65877	0.64735	0.61475	0.74091	0.70266	0.52324	0.48026	0.39363	0.28067	0.37169	0.29917	0.33721	0.32028	0.47922	NaN	NaN	NaN	0.91855	0.7459	0.74034	0.69024	0.6143	0.58246	0.57719	0.604	NaN	NaN	NaN	NaN	NaN	NaN	NaN	S	3			0.999962	0.000780143	179.9	132.19	179.9	0.3997	516240000	345860000	170380000	58
NaN	NaN	NaN	NaN	NaN	0.91154	NaN	1.0089	NaN	NaN	NaN	0.56441	0.39971	NaN	NaN	NaN	NaN	NaN	NaN	NaN	NaN	NaN	NaN	NaN	NaN	NaN	NaN	NaN	NaN	NaN	NaN	NaN	NaN	NaN	NaN	NaN	S	3			0.66669	0.0012745	63.936	45.014	53.033	-0.097046	145270000	98757000	46513000	683
0.9692	0.84448	0.85797	0.75116	0.83678	NaN	NaN	NaN	NaN	0.69274	NaN	NaN	NaN	NaN	NaN	NaN	NaN	NaN	NaN	1.1203	NaN	NaN	NaN	NaN	NaN	NaN	0.50995	NaN	NaN	NaN	NaN	NaN	NaN	NaN	NaN	NaN	S	3			1	0.00153805	297.03	237.65	205.12	-0.58238	61773000	32452000	29321000	614
0.91943	0.7284	0.75506	0.71437	0.75017	0.75169	0.65556	0.94139	0.81014	0.65875	0.63351	0.65858	0.76696	0.82799	0.85471	0.72978	0.6782	0.58912	1.1009	0.72756	0.64224	0.56485	0.69595	NaN	NaN	NaN	NaN	NaN	0.70842	0.59292	0.66639	NaN	0.6632	0.69798	0.68958	0.58964	S	2			1	0.00010811	113.61	65.186	77.185	0.083126	254500000	140680000	113830000	499
0.87882	0.55924	0.77612	1.205	NaN	0.59569	0.86351	1.0523	1.0229	NaN	0.64532	0.61032	0.3786	0.34327	0.54338	0.32177	NaN	NaN	0.89661	NaN	NaN	0.92499	0.89316	0.71924	0.84163	0.89465	0.9443	NaN	NaN	0.67839	0.45409	NaN	NaN	NaN	NaN	NaN	S	3			1	2.48238e-11	238.98	196.18	238.98	-0.30618	280490000	142980000	137510000	562
1.1055	NaN	NaN	NaN	NaN	NaN	NaN	NaN	NaN	NaN	NaN	NaN	NaN	NaN	NaN	NaN	NaN	0.68512	NaN	NaN	NaN	NaN	NaN	NaN	NaN	NaN	NaN	NaN	NaN	NaN	NaN	NaN	NaN	NaN	NaN	NaN	S	3			0.5	3.95343e-06	243.13	184.89	243.13	0.30986	27100000	13984000	13116000	70
1.1055	0.75157	0.67245	0.64801	0.63086	0.89435	0.61743	0.90263	0.87634	0.64641	0.67628	0.6811	0.87717	0.68613	0.76529	0.81832	0.42487	0.68512	1.0952	0.76306	0.66233	NaN	0.44639	0.49518	0.91766	0.59632	0.66725	0.70528	0.8318	0.57077	0.87375	0.60683	0.74037	0.82914	0.69288	0.77327	S	3			0.999671	1.77531e-06	256.33	221.24	255.15	0.3739	834890000	487900000	346990000	71
NaN	NaN	NaN	NaN	NaN	NaN	NaN	NaN	NaN	NaN	NaN	NaN	NaN	1.1035	0.62911	NaN	NaN	NaN	0.88409	0.80225	NaN	NaN	0.97608	NaN	NaN	NaN	NaN	NaN	NaN	NaN	NaN	NaN	NaN	NaN	NaN	NaN	S	3			0.958087	0.00483171	73.758	26.045	73.758	-0.11125	36109000	18660000	17449000	298
NaN	NaN	NaN	NaN	NaN	NaN	NaN	NaN	NaN	NaN	NaN	NaN	NaN	NaN	NaN	NaN	NaN	NaN	NaN	NaN	NaN	NaN	NaN	NaN	NaN	NaN	NaN	NaN	NaN	NaN	NaN	NaN	NaN	NaN	NaN	NaN	S	2			0.995152	0.00252506	86.214	32.015	86.214	0.65208	1729900	1729900	0	16
1.1182	NaN	NaN	NaN	NaN	NaN	NaN	NaN	NaN	NaN	NaN	NaN	NaN	NaN	NaN	NaN	NaN	NaN	NaN	NaN	NaN	NaN	NaN	NaN	NaN	NaN	NaN	NaN	NaN	NaN	NaN	NaN	NaN	NaN	NaN	NaN	S	2			0.999873	2.44967e-05	111.64	73.989	89.301	0.63484	7926100	2414600	5511500	20
NaN	NaN	NaN	NaN	NaN	NaN	NaN	NaN	NaN	NaN	NaN	NaN	NaN	NaN	NaN	NaN	NaN	NaN	NaN	NaN	NaN	NaN	NaN	NaN	NaN	NaN	NaN	NaN	NaN	NaN	NaN	NaN	NaN	NaN	NaN	NaN	S	2			0.306861	0.000296797	85.166	46.968	85.166	-0.91297	0	0	0	342
1.0184	NaN	NaN	NaN	NaN	NaN	NaN	NaN	NaN	NaN	NaN	NaN	NaN	NaN	NaN	NaN	NaN	NaN	NaN	NaN	NaN	NaN	NaN	NaN	NaN	NaN	NaN	NaN	NaN	NaN	NaN	NaN	NaN	NaN	NaN	NaN	S	2			0.603667	0.000296797	85.166	46.968	66.845	-1.0203	13535000	6342500	7192700	343
NaN	NaN	NaN	NaN	NaN	NaN	NaN	NaN	NaN	NaN	NaN	NaN	NaN	NaN	NaN	NaN	NaN	NaN	NaN	NaN	NaN	NaN	NaN	NaN	NaN	NaN	NaN	NaN	NaN	NaN	NaN	NaN	NaN	NaN	NaN	NaN	S	2			0.591332	0.00211166	92.792	66.26	92.792	0.44256	5198000	5198000	0	344
1.1851	0.59898	0.50202	0.62176	0.50796	NaN	NaN	NaN	NaN	NaN	NaN	NaN	NaN	NaN	NaN	NaN	NaN	NaN	0.96204	0.75122	0.58887	0.5808	0.48377	0.51122	0.38554	NaN	0.22433	NaN	NaN	NaN	NaN	NaN	NaN	NaN	NaN	NaN	S	2			0.999895	3.93396e-07	137.81	83.003	88.637	0.11348	255450000	177590000	77863000	350
1.0618	0.80272	0.65706	0.57728	0.59312	0.62574	0.44514	0.72188	0.57271	0.41693	0.43488	NaN	0.33673	0.34459	0.29865	NaN	0.15545	0.12857	1.251	1.7433	0.69795	NaN	0.76897	NaN	NaN	NaN	0.56211	0.58507	0.79445	0.39208	0.40323	0.26279	0.28037	0.13535	0.20044	0.12357	S	3			0.999629	2.74286e-18	243.3	181.21	157.09	-0.2358	266880000	173410000	93470000	284
NaN	NaN	NaN	NaN	NaN	NaN	NaN	NaN	NaN	NaN	NaN	NaN	0.45621	0.47601	NaN	NaN	NaN	NaN	NaN	NaN	NaN	0.66644	NaN	NaN	NaN	NaN	NaN	NaN	NaN	NaN	NaN	NaN	NaN	NaN	NaN	NaN	S	3			0.822199	1.16053e-05	170.47	104.61	167.11	-0.11308	23381000	14338000	9042200	286
NaN	NaN	NaN	NaN	NaN	NaN	NaN	NaN	NaN	NaN	NaN	NaN	NaN	NaN	NaN	NaN	NaN	NaN	NaN	NaN	NaN	NaN	NaN	NaN	NaN	NaN	NaN	NaN	NaN	NaN	NaN	NaN	NaN	NaN	NaN	NaN	S	3			1	0.00387358	104.21	80.272	104.21	0.087107	10328000	6826700	3501400	43
NaN	NaN	NaN	NaN	NaN	NaN	NaN	NaN	NaN	NaN	NaN	NaN	NaN	NaN	NaN	NaN	NaN	NaN	NaN	NaN	NaN	NaN	0.6537	NaN	NaN	NaN	NaN	NaN	NaN	0.3648	0.55682	NaN	NaN	NaN	NaN	NaN	S	2			0.859964	0.00123964	78.705	40.031	78.705	1.8637	129390000	80765000	48625000	49
NaN	NaN	NaN	NaN	NaN	NaN	NaN	NaN	NaN	NaN	NaN	NaN	NaN	NaN	NaN	NaN	0.65726	NaN	NaN	0.696	NaN	NaN	NaN	NaN	NaN	NaN	NaN	NaN	NaN	NaN	NaN	NaN	NaN	NaN	NaN	NaN	S	3			1	0.00117626	151.44	91.043	150.36	-1.3142	113130000	67490000	45640000	52
NaN	0.64738	0.67223	0.5495	0.68283	0.68508	0.56467	0.92578	0.75878	0.5695	0.6067	0.68176	0.57261	0.65317	0.5698	0.48957	0.421	0.40203	1.1246	0.67149	0.58488	0.63848	0.68166	NaN	NaN	0.60551	0.63418	0.67915	0.71962	0.48384	NaN	0.62222	0.60172	0.48359	0.59761	0.47535	S	2			0.98964	0.000210485	93.427	93.427	81.01	-0.16209	495640000	297280000	198360000	187
1.0537	0.71888	0.69553	0.72929	0.77424	0.82916	0.67823	0.83836	0.73223	0.49304	0.75898	0.5544	0.88145	0.66995	0.70956	0.82952	0.3034	0.75012	1.0965	0.82698	0.9157	0.7244	0.37462	0.36237	0.79051	0.66903	0.67678	0.63537	0.80742	0.71135	0.28911	0.7212	0.76736	0.28794	0.69743	0.3037	S	3			0.999661	8.65018e-17	142.56	142.56	115.5	-0.16265	20672000000	11805000000	8866500000	73
NaN	NaN	NaN	NaN	NaN	NaN	NaN	NaN	NaN	NaN	NaN	NaN	NaN	NaN	NaN	NaN	NaN	NaN	NaN	NaN	NaN	NaN	NaN	NaN	NaN	NaN	NaN	NaN	NaN	NaN	NaN	NaN	0.59977	NaN	NaN	NaN	S	4			0.604298	0.00392343	81.197	59.296	81.197	0.26489	35127000	22991000	12136000	81
NaN	NaN	NaN	NaN	NaN	NaN	NaN	NaN	NaN	NaN	NaN	NaN	NaN	NaN	NaN	NaN	NaN	NaN	NaN	NaN	NaN	NaN	NaN	NaN	NaN	NaN	NaN	0.57167	NaN	NaN	NaN	NaN	NaN	NaN	NaN	NaN	S	2			0.999521	1.15643e-06	136.36	82.006	108.34	-0.17198	21521000	12930000	8590900	12
0.91859	0.9716	0.95104	0.77035	0.92754	1.046	0.98721	0.86996	0.90076	1.8628	0.83253	0.58415	1.0299	0.60695	0.91806	0.84877	0.4044	0.6559	1.0177	0.58996	1.483	0.84725	0.5934	0.5505	0.75365	0.81247	0.72108	0.6455	0.88977	0.69407	0.58024	0.72759	0.54036	0.48398	0.71365	0.51578	S	3			0.999837	0.000237082	170.35	138.2	142.23	0.10779	1837800000	1020000000	817810000	169
1.1664	1.3799	1.6971	2.3278	1.9354	2.4783	1.8119	2.7827	2.3633	1.8221	2.2723	2.4444	1.7827	2.1669	1.795	1.5206	1.4163	1.6395	1.3056	1.0566	1.2957	1.8136	1.8882	2.1075	1.2804	1.3061	1.5563	1.5606	1.5756	1.8357	2.1331	1.6801	1.3849	1.3518	1.5517	1.2779	S	2			0.99985	2.72658e-41	188.73	160.43	154.88	0.043221	1424300000	521480000	902830000	554
0.93613	NaN	NaN	NaN	NaN	NaN	NaN	NaN	NaN	NaN	NaN	NaN	NaN	NaN	NaN	NaN	NaN	NaN	NaN	NaN	NaN	NaN	NaN	NaN	NaN	NaN	NaN	2.1315	2.2853	NaN	NaN	NaN	1.7066	NaN	NaN	NaN	S	3			0.621362	0.00128497	52.927	35.566	40.779	-0.2899	73929000	29356000	44574000	557
NaN	0.47667	NaN	NaN	NaN	NaN	NaN	NaN	NaN	NaN	NaN	NaN	NaN	NaN	NaN	NaN	NaN	NaN	NaN	0.55813	0.66947	NaN	NaN	NaN	NaN	NaN	NaN	NaN	NaN	NaN	NaN	NaN	NaN	NaN	NaN	NaN	S	4			0.977	0.000242234	102.19	68.127	59.155	0.10077	34639000	22737000	11902000	466
0.87387	NaN	NaN	NaN	NaN	NaN	NaN	0.21013	NaN	NaN	NaN	NaN	NaN	NaN	NaN	NaN	NaN	NaN	NaN	NaN	NaN	0.33914	NaN	NaN	NaN	NaN	NaN	NaN	NaN	NaN	NaN	NaN	NaN	NaN	NaN	NaN	S	3			0.955181	0.000289956	211.75	153.06	190.86	0.45931	143440000	118200000	25239000	472
NaN	NaN	NaN	NaN	NaN	NaN	NaN	NaN	NaN	NaN	NaN	NaN	NaN	NaN	NaN	NaN	NaN	NaN	NaN	NaN	NaN	NaN	NaN	NaN	NaN	NaN	NaN	NaN	NaN	NaN	NaN	NaN	NaN	NaN	NaN	NaN	S	4			0.664828	0.000332588	59.748	41.817	50.556	0.13658	71816000	71816000	0	513
NaN	NaN	NaN	NaN	NaN	NaN	NaN	NaN	NaN	NaN	NaN	NaN	NaN	NaN	NaN	NaN	NaN	NaN	NaN	0.90011	NaN	0.87616	NaN	NaN	NaN	NaN	NaN	NaN	NaN	NaN	NaN	NaN	NaN	NaN	NaN	NaN	S	4			0.945684	0.000379751	58.319	43.269	50.029	-0.047978	345690000	217560000	128130000	516
1.4176	0.97202	0.62398	1.1216	0.75683	1.2516	0.79162	NaN	0.99979	1.1045	0.67447	NaN	NaN	NaN	1.1567	1.0887	NaN	NaN	NaN	NaN	NaN	NaN	NaN	NaN	NaN	NaN	NaN	NaN	NaN	NaN	NaN	NaN	NaN	NaN	NaN	NaN	S	3			0.529232	0.00028039	212.34	173.45	212.34	0.12358	152760000	79093000	73669000	265
NaN	NaN	NaN	3.1359	4.2085	3.5248	NaN	NaN	5.2158	1.8686	NaN	NaN	NaN	NaN	NaN	NaN	NaN	NaN	NaN	NaN	NaN	NaN	NaN	NaN	NaN	NaN	NaN	NaN	NaN	NaN	NaN	NaN	NaN	NaN	NaN	NaN	S	3			1	0.00191332	138.25	113.35	138.25	-0.3669	98284000	11892000	86391000	4
NaN	NaN	NaN	NaN	NaN	NaN	NaN	NaN	NaN	NaN	NaN	NaN	NaN	NaN	NaN	NaN	NaN	NaN	NaN	NaN	NaN	NaN	NaN	NaN	NaN	NaN	NaN	5.831	5.7831	5.3972	6.0747	5.3865	5.5931	4.3433	3.6749	3.7882	S	2			0.499915	0.0015669	73.834	42.209	73.834	0.16857	103010000	16031000	86976000	615
1.0619	1.1167	1.5056	1.7351	NaN	NaN	2.0253	NaN	2.388	NaN	1.9141	2.1493	NaN	2.4521	2.1634	NaN	NaN	NaN	NaN	1.2106	NaN	NaN	NaN	2.0016	1.4233	1.6119	1.6931	1.597	2.1406	1.4035	2.0064	1.4431	1.6265	1.3841	1.1455	1.0334	S	2			0.999996	3.08341e-15	158.58	114.32	158.58	-0.022011	609040000	231240000	377810000	513
0.93605	0.67064	0.71366	0.62944	0.76934	0.78716	0.72281	0.80645	0.78792	0.90502	0.61066	0.41098	0.52526	0.36989	0.42508	0.29854	0.14002	0.20879	1.0471	0.82009	0.81907	0.72634	0.64578	0.67305	0.72078	0.69724	0.73256	0.62904	0.67024	0.60206	0.84165	0.58568	0.60719	0.39412	0.41854	0.36681	S	3			1	0.000274012	204.62	133.47	197.73	-0.31117	1314200000	779150000	535060000	655
NaN	NaN	NaN	NaN	NaN	NaN	NaN	NaN	NaN	NaN	NaN	NaN	NaN	NaN	NaN	NaN	NaN	NaN	NaN	NaN	NaN	1.4254	NaN	NaN	NaN	NaN	NaN	NaN	NaN	NaN	NaN	NaN	NaN	NaN	NaN	NaN	S	3			0.999993	7.04717e-07	315.29	256.72	315.29	-0.16611	5181300	1128100	4053200	521
NaN	1.186	NaN	NaN	0.60998	NaN	NaN	NaN	NaN	NaN	NaN	NaN	NaN	NaN	NaN	NaN	NaN	NaN	NaN	NaN	1.5728	NaN	NaN	NaN	NaN	NaN	NaN	NaN	NaN	NaN	NaN	NaN	NaN	NaN	NaN	NaN	S	3			0.996049	4.51395e-07	255.54	212.91	255.54	-0.42997	25386000	13146000	12241000	307
NaN	NaN	NaN	NaN	NaN	NaN	NaN	NaN	NaN	NaN	NaN	NaN	NaN	NaN	NaN	NaN	NaN	NaN	NaN	NaN	NaN	NaN	0.34247	NaN	NaN	NaN	NaN	NaN	NaN	NaN	NaN	NaN	NaN	NaN	NaN	NaN	S	2			0.997049	0.000322692	171.33	96.411	96.229	0.16249	14989000	14252000	736490	511
NaN	NaN	NaN	NaN	NaN	NaN	NaN	NaN	NaN	NaN	NaN	NaN	NaN	NaN	NaN	NaN	NaN	NaN	NaN	NaN	NaN	NaN	NaN	NaN	NaN	NaN	NaN	NaN	NaN	NaN	NaN	NaN	NaN	NaN	NaN	NaN	S	4			0.499833	0.00524483	40.931	24.906	40.931	-0.72015	0	0	0	649
0.98055	0.73277	0.71844	0.66844	0.62982	0.71234	0.53984	0.9297	0.87109	0.44911	0.42683	0.77195	0.28289	0.18582	0.12935	0.11745	0.082494	0.10299	1.0498	0.86549	0.73041	0.5629	0.5405	0.91724	0.58124	0.41124	0.43482	0.6861	0.86791	0.76036	0.30672	0.33646	0.5489	0.14455	0.60938	0.097478	S	3			0.99999	1.69565e-05	113.49	83.485	83.226	-0.37148	2224800000	1491700000	733060000	596
NaN	NaN	NaN	NaN	NaN	0.61457	NaN	NaN	NaN	NaN	NaN	NaN	NaN	NaN	NaN	NaN	NaN	NaN	NaN	NaN	NaN	NaN	NaN	NaN	NaN	NaN	NaN	NaN	NaN	NaN	NaN	NaN	0.23387	NaN	NaN	NaN	S	3			0.921011	0.000517451	61.345	37.946	44.848	-0.024049	92429000	53357000	39072000	602
NaN	NaN	NaN	NaN	NaN	NaN	NaN	NaN	NaN	NaN	NaN	NaN	NaN	NaN	NaN	NaN	NaN	NaN	NaN	NaN	NaN	NaN	NaN	NaN	NaN	NaN	NaN	NaN	NaN	NaN	NaN	NaN	NaN	NaN	NaN	NaN	S	3			0.500543	0.000435276	68.97	39.114	57.152	-0.026654	8664600	8664600	0	608
1.1142	0.86876	0.61602	0.66844	0.71032	0.62495	0.49809	0.61404	0.54363	0.44911	0.41965	0.32557	0.284	0.18582	0.12935	0.11745	0.082494	0.10299	0.93861	0.73212	0.91748	0.58493	0.5405	0.39629	0.58124	0.41124	0.43482	0.53427	0.54283	0.47099	0.29519	0.33646	0.23387	0.14455	0.12847	0.062701	S	4			0.997298	1.69565e-05	106.44	85.834	106.44	-0.20918	2175500000	1451500000	724020000	593
NaN	0.7692	0.61845	NaN	0.30713	0.28002	NaN	NaN	NaN	NaN	NaN	NaN	NaN	NaN	NaN	NaN	NaN	NaN	NaN	NaN	0.60072	NaN	0.27043	NaN	NaN	NaN	NaN	NaN	NaN	NaN	NaN	NaN	NaN	NaN	NaN	NaN	S	3			0.5	0.000328546	242.01	219.48	131.12	0.49559	94501000	75192000	19309000	159
NaN	NaN	NaN	NaN	NaN	NaN	NaN	NaN	NaN	NaN	NaN	NaN	NaN	NaN	NaN	NaN	NaN	NaN	NaN	NaN	NaN	NaN	NaN	NaN	NaN	NaN	NaN	NaN	NaN	NaN	NaN	NaN	NaN	NaN	NaN	NaN	S	3			0.483142	0.001139	63.606	49.458	45.363	-0.095824	0	0	0	436
NaN	NaN	NaN	NaN	NaN	NaN	NaN	NaN	NaN	NaN	NaN	NaN	NaN	NaN	NaN	NaN	NaN	NaN	NaN	NaN	NaN	NaN	NaN	NaN	NaN	NaN	NaN	NaN	NaN	NaN	NaN	NaN	NaN	NaN	NaN	NaN	S	3			0.433297	0.001139	63.606	49.458	47.089	-0.050532	0	0	0	437
NaN	NaN	NaN	NaN	NaN	NaN	NaN	NaN	NaN	NaN	NaN	NaN	NaN	NaN	NaN	NaN	NaN	NaN	NaN	NaN	NaN	NaN	NaN	NaN	NaN	NaN	NaN	NaN	NaN	NaN	NaN	NaN	NaN	NaN	NaN	NaN	S	3			0.50114	0.001139	63.606	49.458	45.363	-0.095824	6627700	6627700	0	445
NaN	NaN	NaN	NaN	NaN	NaN	NaN	NaN	NaN	NaN	NaN	NaN	NaN	NaN	NaN	NaN	NaN	NaN	NaN	NaN	NaN	NaN	NaN	NaN	NaN	NaN	NaN	NaN	NaN	NaN	NaN	NaN	NaN	NaN	NaN	NaN	S	3			0.499999	0.000153781	74.766	51.795	74.766	-0.53108	25536000	25536000	0	454
0.99977	0.47143	0.35311	0.25811	0.2256	0.17576	0.15338	0.13747	0.14957	0.076033	0.065858	NaN	NaN	0.059224	0.04095	NaN	NaN	0.033029	1.0784	0.426	0.30973	0.23945	0.22413	0.19807	NaN	NaN	0.12973	0.059653	0.11831	0.096017	NaN	NaN	NaN	0.083109	0.063078	NaN	S	3			0.999998	6.00209e-09	176.44	113.98	149.82	0.092749	1820600000	1465300000	355290000	459
0.84841	0.82298	1.2959	0.90593	1.2426	1.1891	0.74812	1.2484	0.79101	1.3465	1.2137	0.80512	1.2108	1.0848	1.0796	NaN	0.82097	0.51211	0.92613	1.1789	1.0487	0.61754	NaN	0.96294	0.9209	0.78176	0.95995	NaN	1.115	1.1761	1.1838	0.87865	0.71669	0.99589	0.87993	1.0226	S	2			0.99992	5.06721e-16	160.47	125.98	108.45	0.32319	481870000	229520000	252350000	159
NaN	NaN	NaN	NaN	NaN	NaN	NaN	NaN	NaN	NaN	NaN	NaN	NaN	NaN	NaN	1.2105	NaN	NaN	NaN	NaN	NaN	NaN	NaN	NaN	NaN	NaN	NaN	NaN	NaN	NaN	NaN	NaN	NaN	NaN	NaN	NaN	S	2			0.505802	4.59696e-05	113.86	84.238	113.86	0.41562	10296000	4509700	5786200	164
NaN	NaN	NaN	NaN	0.63252	0.73016	0.83755	0.744	0.98255	0.91398	1.1173	1.1105	0.92711	1.134	1.266	1.4825	NaN	NaN	NaN	0.5875	0.87539	NaN	0.8762	0.71268	NaN	NaN	NaN	NaN	NaN	1.5609	1.0333	1.2196	0.95419	0.97781	0.93682	NaN	S	3			1	0.00464088	173.19	79.956	173.19	-0.14972	148120000	75006000	73109000	367
NaN	NaN	1.6876	NaN	1.6927	1.8616	NaN	NaN	NaN	NaN	NaN	NaN	0.94882	NaN	2.3111	NaN	NaN	NaN	NaN	NaN	NaN	NaN	NaN	NaN	NaN	NaN	NaN	NaN	NaN	NaN	NaN	NaN	NaN	NaN	NaN	NaN	S	3			1	0.000427625	153.41	96.241	62.528	-0.22325	64485000	9767600	54718000	381
NaN	NaN	NaN	NaN	NaN	NaN	NaN	1.0105	NaN	NaN	NaN	NaN	1.2146	NaN	NaN	NaN	0.8077	0.53421	NaN	NaN	NaN	NaN	NaN	NaN	NaN	NaN	NaN	NaN	NaN	NaN	1.5922	NaN	NaN	NaN	NaN	NaN	S	3			1	2.2892e-08	292.2	223.72	157.73	0.22827	50220000	38367000	11853000	521
1.0392	0.86002	0.97222	0.9157	0.80569	NaN	0.74406	0.90607	1.1093	0.77902	0.75088	1.0232	0.7891	0.95211	0.71579	0.8799	0.8821	0.95002	1.1293	1.1394	0.75018	0.80709	0.94284	0.76411	NaN	0.88218	0.81206	0.85981	0.84958	0.83309	0.79414	0.82251	NaN	0.64239	0.81875	0.82639	S	3			1	2.44295e-44	331.56	279.48	260.96	-0.67457	1314200000	698160000	616030000	529
1.275	1.7234	1.3664	1.0748	1.5762	1.2998	1.1198	1.6091	1.4592	1.1718	1.3362	1.2726	1.1847	1.4451	1.3487	1.2541	1.1968	1.1619	1.4203	1.3006	1.7615	1.0229	1.3962	1.1923	1.0822	0.9313	1.1641	0.92768	1.1741	1.0427	1.4571	1.1737	1.0871	1.1051	1.0679	1.1469	S	3			1	0.00157358	224.15	199.65	211.26	-0.38151	906600000	406320000	500280000	494
1.275	1.7234	0.45296	0.6365	0.83669	0.45698	0.54722	1.6091	0.51714	0.17839	0.45009	0.84785	0.50959	0.2339	0.62857	0.93333	0.62296	0.55082	1.0205	0.87888	0.77289	0.74626	0.79111	1.1923	1.0822	0.9313	1.1641	0.92768	1.1741	0.76218	0.79151	0.70794	0.56894	0.70238	0.71713	0.57112	S	3			1	0.000352053	292.2	243.64	211.26	-0.38151	19956000000	11276000000	8679500000	498
1.1167	1.8498	1.8959	2.0195	0.70357	1.8556	NaN	2.52	2.1981	1.7212	1.827	1.925	1.9473	2.0995	0.7623	1.7585	NaN	1.6195	1.1644	1.6181	1.4104	1.4859	1.5025	1.5086	1.6796	1.4887	1.773	1.6904	1.8924	1.5155	1.6865	0.50518	1.3022	1.4363	1.735	1.6856	S	3			0.999941	4.23133e-05	105.99	87.657	59.252	-0.062382	1024400000	411460000	612910000	713
NaN	0.70708	0.53014	2.0195	2.0799	1.8556	1.5673	NaN	2.1981	1.1843	1.827	NaN	1.9473	2.0995	1.847	1.1384	1.8187	1.6195	NaN	NaN	NaN	NaN	NaN	NaN	NaN	0.50034	0.64282	NaN	0.55505	0.61658	NaN	1.5949	NaN	NaN	1.735	NaN	S	3			0.999946	0.000424805	88.075	70.874	59.252	-0.062382	539620000	229920000	309710000	714
NaN	1.2112	1.3654	1.2628	1.3125	1.3114	NaN	1.6865	NaN	1.2343	1.1978	NaN	1.3794	1.4079	1.3291	1.2962	1.2826	1.1949	1.2194	1.2786	1.0826	1.1204	1.1161	NaN	NaN	NaN	NaN	NaN	NaN	NaN	NaN	NaN	NaN	NaN	NaN	NaN	S	2			1	1.13915e-07	115.04	78.744	93.243	0.023531	1284200000	348060000	936130000	702
1.0369	1.523	1.2253	0.94423	1.2379	1.2683	1.3861	1.2629	1.3267	1.4537	1.2485	1.0112	1.5741	2.2718	1.2325	1.4865	0.5109	1.0208	1.0399	0.95351	1.2382	1.5597	0.5137	2.1585	1.1346	0.96078	1.2517	2.0123	1.8453	1.772	0.76051	1.6646	1.4133	1.7668	1.1257	2.2103	S	4			1	7.33887e-32	422.25	380.94	103.3	0.0045896	8590900000	4013700000	4577200000	676
NaN	NaN	NaN	NaN	NaN	NaN	NaN	NaN	NaN	NaN	NaN	NaN	NaN	NaN	NaN	NaN	NaN	NaN	NaN	NaN	NaN	NaN	NaN	NaN	NaN	NaN	NaN	NaN	NaN	NaN	1.3765	NaN	1.1318	NaN	NaN	NaN	S	3			0.999969	0.00106765	81.799	58.506	71.735	-0.33531	154020000	110270000	43752000	452
NaN	NaN	NaN	NaN	NaN	NaN	NaN	NaN	NaN	NaN	NaN	NaN	NaN	NaN	NaN	NaN	NaN	NaN	NaN	NaN	NaN	NaN	NaN	NaN	NaN	NaN	NaN	NaN	NaN	NaN	1.3765	NaN	1.1318	NaN	NaN	NaN	S	3			0.999993	0.00106765	81.799	58.506	81.799	0.062059	154020000	110270000	43752000	453
1.0143	3.145	3.011	2.2129	3.1474	3.887	2.9267	2.8201	3.5761	3.4638	4.4956	4.267	3.9407	3.0551	2.9138	4.5008	2.9989	1.8629	1.2141	1.5405	3.1323	1.7749	1.5212	2.1174	2.1212	1.4377	3.4198	2.5542	2.442	NaN	3.1418	3.1271	2.0707	NaN	2.7528	2.4508	S	2			1	5.25043e-05	97.2	74.832	94.087	0.096794	1614800000	408510000	1206300000	642
NaN	NaN	4.6457	13.138	7.2404	NaN	NaN	NaN	3.5336	NaN	0.40321	NaN	7.3921	NaN	NaN	0.81207	3.7776	12.008	NaN	NaN	NaN	NaN	NaN	NaN	NaN	NaN	NaN	NaN	NaN	NaN	NaN	NaN	NaN	NaN	NaN	NaN	S	3			1	0.000429749	86.777	67.379	72.187	0.094454	250210000	11644000	238570000	616
NaN	NaN	4.6457	13.138	7.2404	NaN	NaN	NaN	3.5336	NaN	0.40321	NaN	7.3921	NaN	NaN	0.81207	3.7776	12.008	NaN	NaN	NaN	NaN	NaN	NaN	NaN	NaN	NaN	NaN	NaN	NaN	NaN	NaN	NaN	NaN	NaN	NaN	S	3			1	0.000429749	86.777	67.379	72.187	0.094454	250210000	11644000	238570000	624
NaN	NaN	NaN	NaN	NaN	NaN	NaN	NaN	NaN	NaN	NaN	NaN	NaN	NaN	NaN	NaN	NaN	NaN	NaN	NaN	NaN	NaN	NaN	NaN	NaN	NaN	NaN	NaN	NaN	NaN	NaN	NaN	NaN	NaN	NaN	NaN	S	2			0.413698	0.00119184	69.255	27.677	67.76	-0.96223	0	0	0	182
NaN	NaN	NaN	NaN	NaN	NaN	NaN	NaN	NaN	NaN	NaN	NaN	NaN	NaN	NaN	NaN	NaN	NaN	NaN	NaN	NaN	NaN	NaN	NaN	NaN	NaN	NaN	NaN	NaN	NaN	NaN	NaN	NaN	NaN	NaN	NaN	S	3			0.460772	0.000320806	111.63	76.036	111.63	-0.073227	0	0	0	183
1.4808	1.0275	NaN	NaN	0.72507	NaN	0.78556	NaN	1.0401	0.58223	NaN	0.85756	NaN	0.87547	NaN	0.82145	0.59635	0.71519	1.1276	0.88463	NaN	0.62539	NaN	0.46968	NaN	NaN	NaN	0.8775	0.89384	NaN	0.63949	0.73671	0.69502	0.58325	0.7497	0.76295	S	3			0.99753	2.01811e-05	180.31	151.41	180.31	0.41076	113880000	64659000	49218000	184
0.95792	0.92205	0.8975	0.86535	0.81946	1.0364	1.0388	0.98118	1.0612	1.2342	0.78608	0.61329	0.80332	0.58904	0.7557	0.72042	0.2522	0.32426	1.3527	0.77685	1.638	0.77744	0.72168	0.63481	0.87771	0.86202	0.70914	0.61717	0.8209	0.69194	0.47051	0.64866	0.57977	0.43447	0.55387	0.3353	S	3			1	0.000264325	126.31	78.707	103.97	0.11331	4455300000	2309900000	2145400000	77
NaN	NaN	0.81279	0.93548	NaN	NaN	1.1759	0.99268	0.77939	NaN	0.96186	NaN	1.1155	NaN	NaN	NaN	NaN	0.7926	NaN	0.85211	NaN	NaN	NaN	NaN	1.1128	0.99364	1.1503	NaN	1.1408	1.2606	0.72009	NaN	0.79038	NaN	0.97963	0.86254	S	3			0.994709	0.00225804	92.671	73.665	40.197	-0.064658	427020000	214420000	212600000	84
NaN	NaN	NaN	NaN	NaN	NaN	NaN	NaN	NaN	NaN	NaN	NaN	NaN	NaN	NaN	NaN	NaN	NaN	NaN	NaN	NaN	NaN	NaN	NaN	NaN	NaN	NaN	NaN	NaN	NaN	NaN	NaN	NaN	NaN	NaN	NaN	S	2			0.73647	0.00206556	90.06	56.933	90.06	-0.15539	8423200	8423200	0	301
NaN	NaN	NaN	NaN	NaN	NaN	NaN	NaN	NaN	NaN	NaN	NaN	NaN	NaN	NaN	NaN	NaN	NaN	NaN	NaN	NaN	NaN	NaN	NaN	NaN	NaN	NaN	NaN	NaN	NaN	NaN	NaN	NaN	NaN	NaN	NaN	S	2			0.863531	0.00206556	90.06	56.933	90.06	-0.15539	8423200	8423200	0	305
1.0998	NaN	NaN	0.52345	NaN	0.39912	NaN	0.3934	0.30894	NaN	NaN	NaN	NaN	NaN	NaN	NaN	NaN	NaN	1.1661	NaN	NaN	NaN	NaN	NaN	NaN	NaN	NaN	NaN	NaN	NaN	NaN	NaN	NaN	NaN	NaN	NaN	S	3			0.856996	9.07602e-07	92.474	70.079	92.474	0.12931	331200000	217970000	113230000	373
NaN	0.68907	NaN	NaN	NaN	NaN	0.46707	NaN	NaN	0.51799	NaN	NaN	NaN	NaN	NaN	NaN	NaN	NaN	NaN	NaN	NaN	0.54874	NaN	NaN	NaN	0.41067	NaN	NaN	0.33087	NaN	NaN	NaN	NaN	NaN	NaN	NaN	S	3			0.728225	5.57929e-05	88.574	88.574	88.574	-0.088693	226290000	175730000	50557000	376
NaN	NaN	NaN	NaN	NaN	NaN	NaN	NaN	NaN	NaN	NaN	NaN	NaN	NaN	NaN	NaN	NaN	NaN	NaN	NaN	NaN	NaN	NaN	NaN	NaN	NaN	NaN	NaN	NaN	NaN	NaN	NaN	NaN	NaN	NaN	NaN	S	4			0.639795	0.000133258	70.094	49.256	43.206	0.22944	40338000	40338000	0	378
NaN	NaN	NaN	NaN	NaN	NaN	NaN	NaN	NaN	NaN	NaN	NaN	NaN	NaN	NaN	NaN	NaN	NaN	NaN	NaN	NaN	NaN	NaN	NaN	NaN	NaN	NaN	NaN	NaN	NaN	NaN	NaN	NaN	NaN	NaN	NaN	S	3			0.225799	0.00013001	65.423	43.65	65.423	0.29581	0	0	0	381
NaN	NaN	NaN	NaN	NaN	NaN	NaN	NaN	NaN	NaN	NaN	NaN	NaN	NaN	NaN	NaN	NaN	NaN	NaN	NaN	NaN	NaN	NaN	NaN	NaN	NaN	NaN	NaN	NaN	NaN	NaN	NaN	NaN	NaN	NaN	NaN	S	3			0.225799	0.00013001	65.423	43.65	65.423	0.29581	0	0	0	382
NaN	NaN	NaN	NaN	NaN	NaN	NaN	NaN	NaN	NaN	NaN	NaN	NaN	NaN	NaN	NaN	NaN	NaN	NaN	NaN	NaN	NaN	NaN	NaN	NaN	NaN	NaN	NaN	NaN	NaN	NaN	NaN	NaN	NaN	NaN	NaN	S	3			0.225799	0.00013001	65.423	43.65	65.423	0.29581	0	0	0	383
0.84983	0.99945	0.98374	0.9363	1.1682	1.0801	1.1483	1.0694	1.134	1.0356	0.97015	1.0241	0.95109	1.1996	1.0493	1.2391	0.94096	0.88783	1.0369	1.2326	1.5187	1.075	1.0659	1.3572	1.4801	1.1924	0.99503	NaN	1.2604	1.4283	1.1227	1.0431	0.99355	1.0812	1.1543	1.3027	S	3			0.999997	9.87395e-09	121.92	99.877	100.39	-0.036238	2364300000	1063400000	1300900000	245
NaN	NaN	NaN	NaN	NaN	NaN	NaN	NaN	NaN	NaN	NaN	NaN	NaN	NaN	NaN	NaN	NaN	NaN	NaN	NaN	NaN	NaN	NaN	NaN	NaN	NaN	NaN	NaN	NaN	NaN	NaN	NaN	NaN	NaN	NaN	NaN	S	4			0.420823	0.000809526	43.416	26.202	42.733	-0.1399	0	0	0	134
NaN	0.75406	NaN	0.81656	NaN	NaN	NaN	NaN	NaN	0.84093	NaN	NaN	NaN	1.0744	NaN	NaN	NaN	NaN	NaN	NaN	0.93042	NaN	NaN	NaN	NaN	NaN	NaN	NaN	NaN	NaN	NaN	NaN	NaN	NaN	NaN	NaN	S	4			0.624888	2.48239e-05	53.522	28.974	48.655	-0.052315	213910000	107670000	106230000	137
NaN	NaN	NaN	NaN	NaN	NaN	NaN	NaN	NaN	NaN	NaN	NaN	NaN	NaN	NaN	NaN	NaN	NaN	1.0787	1.0072	1.0772	0.84977	0.9394	0.76459	0.90616	0.79425	0.74048	0.80769	0.88195	0.82813	0.68268	0.46056	0.55222	0.52335	0.54391	0.65523	S	3			1	2.10214e-05	86.748	69.246	46.786	-0.16347	388240000	216780000	171450000	323
NaN	NaN	NaN	NaN	NaN	NaN	NaN	NaN	NaN	NaN	NaN	NaN	NaN	NaN	NaN	NaN	NaN	NaN	1.0787	1.0072	1.0772	0.84977	0.9394	0.44614	1.2196	0.893	1.3099	1.0317	0.88195	0.82813	0.88704	0.46056	0.55222	0.96721	2.3233	0.65523	S	3			1	2.10214e-05	86.748	69.246	46.786	-0.16347	410580000	227370000	183200000	328
0.98311	0.72632	0.66426	0.76076	0.74766	0.68265	0.65737	0.84853	0.84422	0.60404	0.85369	0.74971	0.76728	0.88887	0.89857	0.75158	0.52199	0.55403	0.94451	0.96386	0.75706	0.69054	0.94382	0.63521	0.64884	0.58971	0.67788	0.70846	0.75759	NaN	0.65183	0.77542	0.45305	0.71147	0.708	0.7186	S	4			1	0.00094992	128.79	109.85	128.79	0.14563	937370000	532370000	405000000	86
0.9332	0.91592	0.85161	0.79349	0.83338	0.8982	0.97761	0.9325	0.92235	1.4962	0.77725	0.56776	0.8859	0.54641	0.8635	0.98707	0.45954	0.75117	1.0425	0.77566	1.547	0.83948	0.6877	0.72579	0.87385	0.80567	0.87739	0.67231	0.88395	0.72355	0.65519	0.69215	0.63304	0.55922	0.77786	0.73432	S	3			1	8.86762e-05	208.84	165.44	205.26	-0.16496	13687000000	7664000000	6023000000	94
0.99452	0.77665	NaN	0.6121	0.74998	0.71339	0.63345	0.9884	0.99396	0.3814	0.71169	0.90875	0.71677	0.96601	0.67238	0.64768	NaN	0.55403	0.94451	NaN	0.75706	NaN	0.86855	0.86623	0.72556	NaN	0.73211	0.68359	NaN	NaN	NaN	0.77542	NaN	0.71147	NaN	NaN	S	4			0.93315	0.000514314	111.09	88.726	83.318	0.69866	5753400000	3265600000	2487700000	96
NaN	NaN	NaN	NaN	NaN	NaN	NaN	NaN	NaN	NaN	NaN	NaN	NaN	NaN	NaN	NaN	NaN	NaN	NaN	NaN	NaN	NaN	NaN	NaN	NaN	NaN	NaN	NaN	NaN	NaN	NaN	NaN	NaN	NaN	NaN	NaN	S	3			0.730454	0.000602812	99.273	67.181	64.331	-0.56563	4918600	4918600	0	520
1.1137	NaN	0.9145	NaN	1.2554	0.86483	1.0853	1.0688	0.81841	0.85407	0.93015	0.64146	0.95573	0.80731	1.0191	1.1199	0.58091	0.92227	1.1622	0.92691	0.93388	0.93944	0.65234	0.64683	0.87198	0.64222	1.1851	0.70018	1.0087	0.72428	0.61	0.83646	0.72547	0.37259	0.89109	0.76944	S	3			0.999318	0.00134409	96.805	69.799	84.687	-0.43835	179910000	94660000	85254000	915
NaN	NaN	NaN	NaN	NaN	NaN	NaN	NaN	NaN	NaN	NaN	NaN	NaN	NaN	NaN	NaN	NaN	NaN	NaN	NaN	NaN	NaN	NaN	NaN	NaN	NaN	NaN	NaN	NaN	NaN	NaN	NaN	NaN	NaN	NaN	NaN	S	3			0.97549	0.000784176	96.371	78.356	96.371	-0.42902	5834500	2848500	2986000	381
NaN	NaN	NaN	NaN	NaN	NaN	NaN	NaN	NaN	NaN	NaN	NaN	NaN	NaN	NaN	NaN	NaN	NaN	NaN	NaN	NaN	NaN	NaN	NaN	NaN	NaN	NaN	NaN	0.85283	0.39815	0.77868	0.80742	0.6393	0.69251	1.031	0.84091	S	2			0.994963	2.03454e-05	114.19	80.015	78.674	1.0432	20889000	11976000	8913100	1181
1.2174	0.64152	NaN	NaN	NaN	NaN	NaN	NaN	NaN	NaN	NaN	NaN	NaN	NaN	NaN	NaN	NaN	NaN	NaN	NaN	NaN	NaN	NaN	NaN	NaN	NaN	NaN	NaN	NaN	NaN	NaN	NaN	NaN	NaN	NaN	NaN	S	3			0.995323	0.000757323	58.123	24.876	57.41	0.081401	95862000	66909000	28953000	449
NaN	NaN	NaN	NaN	NaN	NaN	NaN	NaN	NaN	NaN	NaN	NaN	NaN	NaN	NaN	NaN	NaN	NaN	NaN	NaN	NaN	NaN	NaN	NaN	NaN	NaN	NaN	NaN	NaN	NaN	NaN	NaN	NaN	NaN	NaN	NaN	S	3			0.763687	0.0020187	61.276	22.032	61.276	1.2634	10302000	10302000	0	454
1.0472	0.7559	0.60119	0.6971	0.74398	0.59127	0.74256	1.0972	1.1356	1.1488	1.1337	0.74423	1.9497	1.9043	0.92343	2.5651	3.5939	0.89322	1.2531	0.75565	1.0256	0.71561	0.8541	1.1187	0.63026	0.5454	0.62106	0.65989	1.3258	1.1979	2.0601	2.2238	1.6748	1.9116	2.4035	2.222	S	2			0.999996	9.73854e-13	157.02	131.41	139.38	0.13527	1369300000	740010000	629290000	103
1.0472	0.70906	0.60119	0.6971	0.74369	0.72358	0.54071	0.79833	0.77175	0.68517	0.67814	0.74423	0.84803	0.86935	0.92343	0.84001	0.92391	0.89322	1.0556	0.69765	0.86195	0.62821	0.5805	0.59389	0.63026	0.5454	0.62106	NaN	0.68703	0.62145	0.75328	0.66193	0.72106	NaN	0.84709	0.78211	S	2			0.998131	9.73854e-13	157.02	131.41	152.38	0.13456	1195000000	661020000	534000000	106
NaN	NaN	NaN	NaN	NaN	NaN	NaN	NaN	NaN	NaN	NaN	NaN	NaN	NaN	NaN	NaN	NaN	NaN	NaN	NaN	NaN	NaN	NaN	NaN	NaN	NaN	NaN	0.65989	NaN	0.62145	NaN	NaN	NaN	0.6801	NaN	NaN	S	2			0.763144	3.5172e-05	109.12	88.17	109.12	-0.010248	85078000	48861000	36217000	107
1.1537	0.62508	0.72989	0.72375	0.76842	0.89859	0.92899	0.97477	1.0466	1.17	0.88202	0.75119	0.89182	0.7703	0.79535	0.97736	NaN	0.70381	1.1081	0.97514	1.7018	0.99641	0.82292	NaN	1.1147	NaN	NaN	NaN	NaN	1.2682	NaN	NaN	0.7382	0.769	0.96796	0.90037	S	3			1	4.06499e-07	269.33	209.16	233.28	0.12652	1011900000	591850000	420100000	160
NaN	NaN	NaN	0.77755	0.71388	NaN	NaN	NaN	NaN	NaN	NaN	0.65491	NaN	NaN	NaN	NaN	NaN	NaN	NaN	NaN	NaN	NaN	NaN	NaN	NaN	NaN	NaN	NaN	NaN	NaN	NaN	NaN	NaN	NaN	0.55715	NaN	S	2			0.785576	1.46303e-11	154.72	118.09	129.46	0.26127	24554000	14425000	10129000	419
NaN	0.74015	0.81473	NaN	NaN	0.66477	NaN	NaN	0.75196	0.65605	0.69827	NaN	0.7633	0.67133	0.739	0.59521	0.72548	NaN	0.96277	0.66655	0.68217	0.68107	0.62077	NaN	NaN	NaN	0.74801	0.70298	NaN	NaN	NaN	NaN	NaN	NaN	NaN	0.62235	S	2			0.996439	5.89801e-08	140.47	88.527	132.83	-0.0075503	130690000	74043000	56649000	421
NaN	NaN	NaN	NaN	NaN	NaN	NaN	NaN	NaN	NaN	NaN	NaN	NaN	NaN	NaN	NaN	NaN	NaN	NaN	NaN	NaN	NaN	NaN	0.68283	0.52345	0.61899	0.43545	NaN	0.69951	NaN	0.39934	NaN	NaN	NaN	NaN	NaN	S	2			0.999883	7.85762e-05	109.19	74.537	109.19	-0.44516	44650000	31754000	12897000	1112
NaN	NaN	NaN	NaN	NaN	NaN	NaN	NaN	NaN	NaN	NaN	NaN	NaN	NaN	NaN	NaN	NaN	NaN	NaN	NaN	NaN	NaN	NaN	0.68283	0.52345	0.61899	0.43545	NaN	0.69951	NaN	0.39934	NaN	NaN	NaN	NaN	NaN	S	2			0.995651	7.85762e-05	109.19	74.537	91.655	-0.24317	44650000	31754000	12897000	1119
NaN	0.61808	NaN	0.59258	0.83497	0.68777	NaN	0.84811	0.66533	0.58463	NaN	0.42029	0.4128	NaN	0.31372	NaN	NaN	NaN	NaN	NaN	NaN	NaN	NaN	NaN	NaN	NaN	NaN	NaN	NaN	NaN	NaN	NaN	NaN	NaN	NaN	NaN	S	2			0.916947	0.00240519	76.165	40.623	61.233	0.20231	24209000	14772000	9436100	974
NaN	NaN	NaN	NaN	NaN	NaN	NaN	NaN	NaN	NaN	NaN	NaN	NaN	NaN	NaN	NaN	NaN	NaN	NaN	NaN	NaN	NaN	NaN	NaN	NaN	NaN	NaN	NaN	NaN	NaN	NaN	NaN	NaN	NaN	NaN	NaN	S	3			0.333884	8.22611e-05	201.57	139.37	127.49	-0.54001	0	0	0	998
NaN	NaN	NaN	NaN	NaN	NaN	NaN	0.66207	NaN	NaN	NaN	NaN	NaN	NaN	NaN	NaN	NaN	NaN	NaN	NaN	NaN	NaN	NaN	NaN	NaN	NaN	NaN	NaN	NaN	NaN	NaN	NaN	NaN	NaN	NaN	NaN	S	3			0.698862	8.22611e-05	201.57	139.37	50.178	-0.21738	13904000	8041400	5863100	999
NaN	NaN	NaN	NaN	1.8206	NaN	1.0051	0.93509	NaN	NaN	NaN	NaN	NaN	NaN	NaN	NaN	0.13247	NaN	NaN	NaN	1.0589	0.65248	0.91934	NaN	NaN	NaN	NaN	NaN	NaN	NaN	NaN	NaN	NaN	NaN	NaN	NaN	S	3			0.932608	8.22611e-05	208.37	174.18	172.99	0.29585	183840000	112200000	71646000	1000
NaN	NaN	NaN	NaN	1.2389	NaN	1.0051	1.4044	NaN	NaN	1.0943	0.66929	NaN	NaN	NaN	NaN	NaN	NaN	NaN	0.79556	1.0589	0.65248	0.91934	NaN	NaN	NaN	NaN	NaN	NaN	NaN	NaN	NaN	NaN	NaN	NaN	NaN	S	3			0.999883	8.22611e-05	208.37	174.18	201.57	0.80715	340150000	230070000	110080000	1011
1.2436	1.0475	0.90053	0.76977	0.8141	0.76569	NaN	0.93539	0.86576	0.65764	0.64326	0.96883	0.88259	0.82891	0.64828	NaN	0.63654	0.84144	NaN	NaN	NaN	NaN	NaN	NaN	NaN	NaN	NaN	NaN	1.1731	NaN	NaN	0.55152	NaN	0.56164	NaN	NaN	S	2			0.999985	0.00434545	63.894	41.503	63.894	0.59623	109300000	60923000	48373000	989
NaN	1.0965	0.81468	NaN	1.2972	1.331	NaN	NaN	NaN	1.009	0.94395	1.0801	NaN	1.2293	1.1738	1.2213	1.0249	1.1207	NaN	NaN	NaN	NaN	NaN	NaN	NaN	NaN	NaN	NaN	NaN	NaN	NaN	NaN	0.96578	0.98355	NaN	0.86822	S	4			0.99987	4.89079e-06	81.48	63.801	66.041	-0.048486	1142800000	527740000	615080000	227
1.0183	0.62314	0.66644	0.5794	0.52933	0.6974	0.5026	0.65734	0.42788	0.46322	0.78044	0.24324	0.38573	0.18681	0.22514	0.16525	NaN	NaN	1.13	0.77509	0.61924	0.71298	0.75507	0.27405	0.66019	0.70237	0.50285	0.53334	0.51326	0.60512	1.0437	1.0599	0.99684	NaN	1.0263	0.91245	S	4			0.999288	2.70737e-08	178.23	153.91	140.32	-0.12848	1604200000	1161300000	442870000	116
NaN	NaN	NaN	NaN	NaN	NaN	NaN	NaN	NaN	NaN	NaN	NaN	NaN	NaN	NaN	NaN	NaN	NaN	NaN	NaN	NaN	NaN	NaN	NaN	NaN	NaN	NaN	NaN	NaN	NaN	NaN	NaN	NaN	NaN	NaN	NaN	S	3			0.316737	0.00587463	50.505	15.724	50.505	0.52945	0	0	0	279
NaN	NaN	NaN	NaN	NaN	NaN	NaN	NaN	NaN	NaN	NaN	NaN	NaN	NaN	NaN	NaN	NaN	NaN	NaN	NaN	NaN	NaN	NaN	NaN	NaN	NaN	NaN	NaN	NaN	NaN	NaN	NaN	NaN	NaN	NaN	NaN	S	3			0.314426	0.00587463	50.505	15.724	50.505	0.52945	0	0	0	283
0.89182	0.53482	1.1646	NaN	NaN	NaN	1.8618	NaN	NaN	2.3538	0.5258	NaN	NaN	NaN	0.51174	NaN	NaN	NaN	NaN	NaN	NaN	NaN	NaN	NaN	NaN	NaN	NaN	NaN	NaN	NaN	NaN	3.2554	1.9241	NaN	1.7278	NaN	S	2			1	0.000592333	90.348	56.476	74.726	0.16446	75455000	34131000	41325000	109
0.75697	NaN	NaN	0.88044	NaN	NaN	NaN	1.354	NaN	NaN	NaN	NaN	NaN	NaN	NaN	NaN	NaN	NaN	NaN	1.2187	NaN	NaN	NaN	0.60729	NaN	0.58155	0.46632	NaN	0.68154	0.56598	0.44321	0.35719	NaN	0.65641	NaN	0.5058	S	3			0.999819	0.00289321	152.11	116.52	137.62	0.76475	78578000	46965000	31613000	242
0.70272	NaN	NaN	0.88044	NaN	NaN	NaN	1.354	NaN	NaN	NaN	NaN	NaN	NaN	NaN	NaN	NaN	NaN	NaN	1.2187	NaN	NaN	NaN	0.60729	NaN	0.58155	0.46632	NaN	0.68154	0.56598	0.44321	0.35719	NaN	0.65641	NaN	0.5058	S	3			0.999691	0.00289321	152.11	116.52	137.62	0.76475	78578000	46965000	31613000	245
NaN	NaN	NaN	0.41913	0.46602	0.5335	0.36859	0.61384	0.48775	NaN	0.32402	NaN	NaN	NaN	NaN	NaN	NaN	NaN	NaN	NaN	NaN	NaN	NaN	0.39391	NaN	NaN	0.3551	0.4173	NaN	NaN	NaN	NaN	NaN	NaN	NaN	NaN	S	2			1	0.00379452	75.316	43.682	75.316	0.23115	38714000	25695000	13019000	229
1.0287	1.0013	0.80392	0.70332	0.96552	1.0408	1.0343	1.0956	1.4338	1.1436	1.0317	1.1609	1.1151	1.3942	1.1224	1.4571	1.1218	0.9747	1.1473	1.0836	1.6512	1.0387	1.0904	1.0186	1.0028	1.0231	1.02	0.7603	1.1302	1.5502	1.0381	1.1622	0.93556	1.0225	1.0635	1.0937	S	3			1	1.11262e-25	392.71	323.1	290.68	0.30215	2000300000	1094700000	905620000	183
0.77738	0.27325	NaN	NaN	NaN	NaN	NaN	NaN	NaN	0.24977	NaN	NaN	0.40688	0.34564	0.19467	NaN	0.24365	NaN	0.79085	0.4236	1.2959	0.47705	0.4154	NaN	0.40558	NaN	NaN	NaN	0.33997	0.93331	0.33534	0.56197	0.27088	0.4162	0.29932	0.36987	S	3			1	2.98083e-11	290.68	246.06	290.68	0.30215	563780000	401640000	162140000	185
1.4997	NaN	NaN	0.29902	NaN	0.92241	NaN	NaN	NaN	1.5926	0.40036	NaN	NaN	NaN	NaN	NaN	NaN	NaN	NaN	NaN	NaN	NaN	NaN	NaN	0.5248	0.68061	0.44828	NaN	NaN	NaN	NaN	NaN	NaN	NaN	NaN	NaN	S	3			0.99996	0.000235725	293.88	241.3	253.64	0.7716	78326000	55351000	22975000	730
1.4997	NaN	NaN	0.29902	NaN	0.92241	NaN	NaN	NaN	1.5926	0.40036	NaN	NaN	NaN	NaN	NaN	NaN	NaN	NaN	0.12688	NaN	NaN	NaN	NaN	0.5248	0.68061	0.44828	NaN	NaN	NaN	NaN	NaN	NaN	NaN	NaN	NaN	S	3			0.999976	0.000235725	293.88	241.3	215.04	-0.25252	89353000	64055000	25297000	733
0.64321	0.70728	0.87602	0.92026	0.88935	1.0536	0.74233	1.2005	1.0278	0.76779	0.86718	0.93618	0.98708	1.0664	0.90851	0.99045	0.78811	0.82968	1.1646	0.64064	1.2295	0.80391	0.61031	0.89649	0.87808	0.91483	0.722	0.92243	0.80556	0.86878	0.67053	0.85206	0.79232	0.59753	NaN	0.66865	S	2			1	1.9008e-32	232.84	198.09	107.56	0.16986	1268200000	686150000	582100000	347
1.0137	0.59741	0.61784	0.58068	0.6606	0.69736	NaN	0.79027	0.60479	0.64366	NaN	0.7258	0.71595	NaN	0.56466	0.32906	0.23108	NaN	1.1108	0.6355	0.52292	0.63954	0.59543	0.56249	0.49679	0.56521	0.5173	0.72385	0.73721	0.69219	0.57185	0.54735	0.61349	0.81631	0.38675	0.43431	S	3			1	0.000238954	185.6	99.923	160.75	-0.28202	254780000	150900000	103870000	311
1.1188	1.2077	1.604	1.0857	1.4784	NaN	1.4845	NaN	NaN	1.4945	1.4414	0.87361	NaN	NaN	1.2499	1.511	0.73228	NaN	1.3786	NaN	1.4693	1.0692	0.92451	NaN	NaN	1.5602	1.6752	1.4592	1.7413	NaN	1.7495	2.1804	1.9651	1.331	1.8874	1.5287	S	3			0.999982	0.000131912	241.3	200.04	231.17	0.33168	417310000	179250000	238060000	502
NaN	0.63969	0.56434	NaN	NaN	0.56821	0.50665	0.57376	0.56421	0.5473	0.4968	0.52716	0.49124	0.40415	0.21733	0.17858	NaN	NaN	0.96764	NaN	0.6448	0.34106	0.51834	0.44552	NaN	0.5402	NaN	0.55413	NaN	NaN	0.4624	0.32323	NaN	0.25299	0.19489	NaN	S	3			0.912314	0.00046029	67.194	40.453	67.194	0.5558	204660000	133180000	71481000	435
NaN	0.63969	0.56434	NaN	NaN	0.56821	0.50665	0.57376	0.56421	0.5473	0.4968	0.52716	0.49124	0.40415	0.21733	0.17858	NaN	NaN	NaN	NaN	NaN	NaN	NaN	0.44552	NaN	0.5402	0.31409	0.55413	NaN	NaN	NaN	0.32323	NaN	0.25299	0.19489	0.18074	S	3			0.859607	0.00046029	68.171	39.778	68.171	0.34436	173810000	116990000	56815000	437
NaN	NaN	NaN	NaN	0.60792	NaN	NaN	NaN	NaN	0.5473	NaN	NaN	NaN	NaN	NaN	NaN	NaN	NaN	NaN	NaN	NaN	NaN	NaN	NaN	NaN	NaN	0.31409	NaN	NaN	NaN	0.4624	NaN	NaN	NaN	NaN	NaN	S	3			0.859607	0.00293874	68.171	39.778	68.171	0.34436	28791000	17924000	10867000	438
NaN	NaN	NaN	NaN	NaN	NaN	NaN	1.0166	0.57823	NaN	0.76529	NaN	NaN	NaN	NaN	NaN	NaN	NaN	NaN	NaN	NaN	NaN	NaN	0.59213	NaN	0.67481	0.80846	1.0034	0.69986	0.40697	0.57534	NaN	NaN	NaN	NaN	NaN	S	3			0.950542	0.000175629	65.022	42.086	65.022	0.1308	129690000	84571000	45117000	1534
1.6903	0.8387	0.87214	0.71608	0.83608	0.94669	0.58906	1.0364	0.77574	0.49401	NaN	0.98194	NaN	0.84755	0.70544	0.62895	NaN	NaN	NaN	0.81626	0.66001	NaN	0.83202	NaN	0.82904	0.86272	0.80428	0.70625	1.0646	0.75734	1.034	0.76897	0.59195	0.50689	0.54038	0.36787	S	3			1	1.75891e-08	93.956	82.241	93.956	-0.56877	548150000	306450000	241700000	998
1.063	NaN	NaN	NaN	NaN	NaN	NaN	NaN	NaN	NaN	NaN	NaN	NaN	NaN	NaN	NaN	NaN	NaN	NaN	NaN	0.64185	NaN	NaN	NaN	NaN	0.22325	0.18617	NaN	NaN	NaN	NaN	NaN	NaN	NaN	NaN	NaN	S	3			0.999931	1.22918e-05	275.76	246.74	242.01	0.0056157	94134000	64034000	30101000	128
NaN	0.9734	0.9133	0.54573	0.84365	0.84673	0.72271	1.2199	0.75881	0.40062	0.69681	NaN	0.65654	1.4151	1.1548	1.2838	1.2098	1.2167	1.0635	0.76387	0.54741	0.82587	0.7281	NaN	NaN	NaN	NaN	NaN	NaN	0.45757	NaN	1.2538	1.2892	1.3235	1.7186	1.2888	S	2			0.993774	0.00585826	68.972	38.58	68.972	-0.23235	142620000	74523000	68095000	352
NaN	NaN	NaN	NaN	NaN	NaN	NaN	NaN	NaN	NaN	NaN	NaN	NaN	NaN	NaN	NaN	NaN	NaN	NaN	NaN	NaN	NaN	NaN	NaN	NaN	NaN	NaN	NaN	NaN	NaN	NaN	NaN	NaN	NaN	NaN	NaN	S	2			0.486807	0.000346375	95.624	66.526	95.624	-0.42579	0	0	0	803
1.6388	NaN	NaN	NaN	NaN	NaN	NaN	NaN	NaN	NaN	NaN	NaN	NaN	NaN	NaN	NaN	NaN	NaN	NaN	NaN	NaN	NaN	NaN	NaN	NaN	NaN	NaN	NaN	NaN	NaN	NaN	NaN	NaN	NaN	NaN	NaN	S	2			0.558425	8.15202e-05	96.848	67.119	69.071	0.36449	13475000	9196200	4278900	804
NaN	0.91831	NaN	NaN	0.88387	1.2731	NaN	0.77382	NaN	NaN	NaN	NaN	NaN	NaN	NaN	NaN	NaN	NaN	NaN	NaN	NaN	0.80923	NaN	NaN	NaN	NaN	NaN	NaN	NaN	NaN	NaN	NaN	NaN	NaN	NaN	NaN	S	2			0.917995	0.000145189	93.104	59.79	72.316	-0.0048813	40982000	24539000	16443000	805
0.94417	NaN	NaN	0.96473	NaN	NaN	NaN	NaN	NaN	NaN	NaN	NaN	NaN	NaN	NaN	NaN	NaN	NaN	NaN	NaN	NaN	NaN	NaN	NaN	NaN	NaN	NaN	NaN	NaN	NaN	NaN	NaN	NaN	NaN	NaN	NaN	S	2			1	0.0040574	64.298	31.061	64.298	0.083313	20266000	9920900	10345000	1487
NaN	NaN	NaN	NaN	NaN	NaN	NaN	NaN	NaN	NaN	NaN	NaN	NaN	NaN	NaN	NaN	NaN	NaN	NaN	NaN	NaN	NaN	NaN	NaN	NaN	NaN	NaN	NaN	NaN	NaN	NaN	NaN	NaN	NaN	NaN	NaN	S	3			0.777236	0.000455119	54.48	29.647	54.48	0.31768	2825700	0	2825700	1613
0.85512	NaN	NaN	NaN	NaN	NaN	NaN	1.0636	NaN	NaN	0.71345	NaN	NaN	NaN	NaN	NaN	NaN	0.55911	NaN	NaN	NaN	NaN	NaN	1.0525	0.69834	0.57034	0.60489	0.87822	0.85287	1.1154	1.3353	0.9957	1.1342	1.2393	0.91483	1.1446	S	3			0.822939	0.00342832	50.87	35.324	50.87	0.08618	232610000	121790000	110810000	131
0.85512	NaN	NaN	NaN	NaN	NaN	NaN	1.0636	NaN	NaN	0.71345	NaN	NaN	NaN	NaN	NaN	NaN	0.55911	NaN	NaN	NaN	NaN	NaN	1.0525	0.69834	0.57034	0.60489	0.87822	0.85287	1.1154	1.3353	0.9957	1.1342	1.2393	0.91483	1.1446	S	3			0.685402	0.00342832	50.87	35.324	44.029	0.1257	232610000	121790000	110810000	137
NaN	NaN	NaN	NaN	NaN	NaN	NaN	NaN	NaN	NaN	NaN	NaN	NaN	NaN	NaN	NaN	NaN	NaN	NaN	NaN	1.1513	0.69638	NaN	0.8844	NaN	NaN	0.86551	NaN	0.79654	NaN	0.71623	NaN	0.70011	NaN	NaN	NaN	S	3			0.9975	8.42019e-09	85.184	64.307	60.363	0.45154	67201000	36455000	30746000	166
NaN	NaN	NaN	NaN	NaN	NaN	NaN	NaN	NaN	NaN	NaN	NaN	NaN	NaN	NaN	NaN	NaN	NaN	NaN	NaN	NaN	NaN	NaN	NaN	NaN	NaN	NaN	NaN	NaN	NaN	NaN	NaN	NaN	0.7177	0.81958	NaN	S	3			0.503831	0.00119498	43.103	27.505	43.103	0.4359	17682000	8503200	9179100	172
1.1761	0.46967	0.86739	0.45022	0.67182	NaN	NaN	NaN	NaN	0.39784	0.3655	NaN	NaN	NaN	NaN	NaN	NaN	NaN	NaN	NaN	0.95614	0.58727	0.8425	NaN	NaN	NaN	NaN	NaN	NaN	NaN	NaN	NaN	NaN	NaN	NaN	NaN	S	3			1	0.000680219	149.57	96.335	138.06	-0.12229	37269000	20197000	17071000	666
NaN	NaN	NaN	NaN	NaN	NaN	NaN	NaN	NaN	NaN	NaN	NaN	NaN	NaN	NaN	NaN	NaN	NaN	NaN	NaN	NaN	NaN	NaN	NaN	NaN	NaN	NaN	NaN	NaN	NaN	NaN	NaN	NaN	NaN	NaN	NaN	S	3			0.483143	2.12684e-06	75.297	60	57.144	-0.24016	0	0	0	102
NaN	NaN	NaN	NaN	NaN	NaN	NaN	NaN	NaN	NaN	NaN	NaN	NaN	NaN	NaN	NaN	NaN	NaN	NaN	NaN	NaN	NaN	NaN	NaN	NaN	NaN	NaN	NaN	NaN	NaN	NaN	NaN	0.45506	NaN	NaN	0.33552	S	3			0.705254	2.12684e-06	75.297	60	62.696	0.1221	32793000	19064000	13729000	106
0.82756	0.56208	NaN	NaN	0.99301	NaN	0.86406	NaN	0.82996	0.59179	0.68148	NaN	0.77184	1.3922	0.75693	0.87816	0.92593	0.81487	NaN	NaN	NaN	NaN	NaN	NaN	NaN	NaN	NaN	NaN	NaN	NaN	NaN	NaN	NaN	NaN	NaN	NaN	S	3			0.999904	0.00243163	55.844	34.843	55.844	0.76927	99140000	54647000	44493000	12
NaN	NaN	NaN	NaN	NaN	NaN	NaN	NaN	NaN	NaN	NaN	NaN	NaN	NaN	NaN	NaN	NaN	NaN	NaN	NaN	NaN	NaN	NaN	NaN	NaN	NaN	NaN	NaN	NaN	NaN	NaN	NaN	NaN	NaN	NaN	NaN	S	3			0.49949	2.70455e-09	213.64	181.98	213.64	0.31672	0	0	0	455
NaN	NaN	NaN	NaN	NaN	NaN	NaN	NaN	NaN	NaN	0.71592	0.42874	NaN	NaN	NaN	NaN	NaN	NaN	NaN	0.6046	0.72398	NaN	NaN	NaN	NaN	NaN	NaN	NaN	NaN	NaN	NaN	NaN	NaN	NaN	NaN	NaN	S	3			0.959697	7.65371e-05	74.3	48.313	52.721	-0.10862	42348000	28377000	13971000	187
NaN	NaN	NaN	NaN	NaN	NaN	NaN	NaN	NaN	NaN	NaN	NaN	NaN	NaN	NaN	NaN	NaN	NaN	NaN	NaN	NaN	NaN	NaN	NaN	NaN	NaN	NaN	NaN	NaN	NaN	NaN	NaN	NaN	NaN	NaN	NaN	S	3			0.758599	0.00191814	50.767	32.222	50.767	0.77265	4155700	4155700	0	189
NaN	NaN	NaN	NaN	NaN	NaN	NaN	NaN	0.68414	NaN	NaN	0.7726	NaN	NaN	NaN	NaN	NaN	NaN	NaN	NaN	NaN	NaN	NaN	NaN	NaN	2.3145	1.9317	1.6145	NaN	NaN	NaN	NaN	NaN	NaN	NaN	NaN	S	3			1	2.0089e-07	260.98	42.877	240.1	0.41481	152110000	90465000	61647000	620
NaN	NaN	NaN	NaN	NaN	NaN	NaN	NaN	NaN	NaN	NaN	NaN	NaN	NaN	NaN	NaN	NaN	NaN	NaN	NaN	NaN	NaN	NaN	NaN	NaN	NaN	NaN	NaN	NaN	NaN	NaN	NaN	NaN	NaN	NaN	NaN	S	3			0.99952	0.00157379	162.76	106.62	147.58	-0.43456	11245000	11245000	0	447
1.1167	0.93355	1.0473	0.74868	0.83384	0.82229	NaN	0.82429	0.86494	0.9682	0.73517	NaN	0.72338	0.76308	0.63911	0.79346	NaN	0.48781	NaN	NaN	NaN	NaN	NaN	NaN	NaN	NaN	NaN	NaN	NaN	NaN	NaN	NaN	NaN	NaN	NaN	NaN	S	3			0.999987	0.00303387	227.36	166.12	227.36	0.60878	142810000	73590000	69224000	72
0.9658	0.8216	0.75337	0.49218	0.54735	0.59323	0.76172	1.0937	0.90236	0.65631	0.59018	0.76369	0.69203	0.90171	0.83389	0.75976	0.69669	NaN	1.2168	0.59364	0.5101	0.84012	0.65499	0.93338	0.74845	0.52746	0.72494	0.72575	0.74686	0.6507	0.79922	0.89203	0.55219	0.56459	0.75209	0.77728	S	3			0.999626	6.88284e-05	217.19	187.21	184.36	-0.089879	333300000	188220000	145070000	108
NaN	NaN	NaN	NaN	NaN	NaN	NaN	NaN	NaN	NaN	NaN	NaN	NaN	NaN	NaN	NaN	NaN	NaN	NaN	NaN	NaN	NaN	NaN	NaN	NaN	NaN	NaN	NaN	NaN	NaN	NaN	NaN	NaN	NaN	NaN	NaN	S	2			0.999871	4.26909e-16	158.44	98.374	158.44	0.3568	8553200	8553200	0	140
NaN	NaN	NaN	NaN	NaN	NaN	NaN	NaN	NaN	NaN	NaN	NaN	NaN	1.0048	NaN	NaN	0.79114	NaN	NaN	NaN	NaN	NaN	NaN	0.60067	NaN	NaN	NaN	NaN	NaN	NaN	NaN	NaN	NaN	NaN	NaN	NaN	S	4			0.869699	4.74158e-07	76.573	61.439	42.468	-0.45737	257650000	137060000	120590000	505
NaN	NaN	NaN	NaN	NaN	NaN	NaN	NaN	NaN	NaN	NaN	NaN	NaN	NaN	NaN	NaN	NaN	NaN	NaN	NaN	NaN	NaN	NaN	NaN	NaN	NaN	NaN	NaN	NaN	NaN	NaN	NaN	NaN	NaN	NaN	NaN	S	3			0.467452	2.05792e-06	69.77	55.841	44.721	-0.52297	0	0	0	509
0.99719	NaN	NaN	0.80662	NaN	0.99762	NaN	1.074	NaN	NaN	0.9437	0.82475	NaN	NaN	NaN	NaN	NaN	NaN	NaN	1.0645	NaN	NaN	NaN	NaN	0.89791	0.91912	NaN	NaN	0.8056	1.0457	NaN	NaN	0.86177	NaN	1.0599	0.78545	S	3			0.901871	3.58903e-10	97.128	83.416	92.258	-0.54044	576270000	296730000	279530000	511
1.0082	0.77155	NaN	NaN	NaN	NaN	0.88102	NaN	NaN	0.891	NaN	NaN	NaN	NaN	NaN	NaN	0.79252	NaN	NaN	NaN	NaN	NaN	NaN	NaN	0.76994	0.90155	NaN	NaN	NaN	1.0589	NaN	NaN	NaN	NaN	NaN	NaN	S	3			0.930384	1.41561e-07	81.001	65.319	81.001	-0.22379	264510000	141820000	122680000	515
1.1088	0.81909	0.86005	0.89758	0.88553	0.88852	NaN	1.084	1.0217	0.77406	0.80324	0.87011	NaN	NaN	0.92587	0.8815	0.8357	0.85365	1.138	0.95244	0.82542	0.82254	0.78924	0.75489	0.79049	0.77481	0.86486	0.76978	0.94371	0.89172	0.88868	0.82861	0.8093	0.83999	0.82369	0.94374	S	2			1	1.78083e-07	124.82	54.153	104.53	0.92497	1701000000	877930000	823030000	364
0.82097	0.59185	0.62016	0.43812	0.6476	NaN	0.47029	0.57705	0.52123	0.62712	0.44028	NaN	0.79737	0.39765	1.0633	0.45548	0.47036	2.0368	0.80556	0.49478	0.57679	0.65132	NaN	NaN	NaN	NaN	NaN	NaN	0.47499	0.55733	0.75856	0.52218	NaN	0.34473	NaN	0.35204	S	3			1	0.000713811	250.08	182.13	238.88	-0.018663	300340000	185060000	115290000	1257
1.053	0.76868	0.87955	0.73751	0.81573	0.94104	0.89977	1.173	0.99127	0.82265	0.93114	0.99762	1.0093	0.86761	0.73071	0.81686	0.71918	2.0368	1.2715	0.87503	0.86381	0.46833	0.82513	0.68983	0.62537	NaN	0.61654	0.70161	0.68361	0.60027	0.75856	0.66176	0.65912	0.52173	0.62657	0.53541	S	3			1	0.000713811	254.1	197.47	238.88	-0.018663	819730000	478380000	341350000	1259
NaN	NaN	NaN	NaN	NaN	0.91709	NaN	NaN	0.73984	NaN	NaN	NaN	NaN	NaN	NaN	NaN	NaN	NaN	NaN	0.79183	NaN	NaN	NaN	NaN	NaN	NaN	NaN	NaN	NaN	NaN	NaN	NaN	NaN	NaN	NaN	NaN	S	3			0.771503	7.80376e-06	80.477	54.35	61.186	-0.32495	51374000	30226000	21148000	1269
NaN	NaN	0.70009	0.69668	0.84046	NaN	NaN	NaN	NaN	NaN	NaN	NaN	NaN	1.0357	NaN	NaN	NaN	0.85611	1.1206	NaN	0.60354	NaN	NaN	NaN	NaN	NaN	NaN	NaN	0.55676	NaN	0.79866	NaN	0.68263	NaN	NaN	NaN	S	3			0.803293	4.73907e-06	84.68	65.006	84.68	-0.045052	150400000	85467000	64930000	1273
NaN	NaN	NaN	NaN	NaN	NaN	NaN	NaN	NaN	NaN	NaN	NaN	NaN	NaN	NaN	NaN	NaN	NaN	NaN	NaN	NaN	NaN	NaN	NaN	NaN	NaN	NaN	NaN	NaN	NaN	NaN	NaN	NaN	NaN	NaN	NaN	S	2			1	6.46823e-05	101.38	101.38	80.17	-0.17803	0	0	0	6
0.8392	0.54311	0.58442	0.56558	0.65083	0.57162	0.46839	0.816	0.64666	0.47703	0.41939	0.36171	0.19408	0.13794	0.081633	NaN	0.059018	0.058741	0.96621	0.58951	0.50635	0.57902	0.54916	0.55491	0.53472	0.48672	0.48352	0.49574	0.59088	0.31793	NaN	0.16064	0.11702	0.1076	0.1131	0.086608	S	2			1	7.90998e-05	115.37	71.87	98.582	0.08769	2257000000	1465400000	791520000	53
NaN	NaN	NaN	NaN	NaN	NaN	NaN	NaN	NaN	NaN	NaN	NaN	NaN	NaN	NaN	NaN	NaN	NaN	NaN	NaN	NaN	NaN	NaN	NaN	NaN	NaN	NaN	NaN	NaN	NaN	NaN	NaN	NaN	NaN	NaN	NaN	S	3			0.807008	0.000682722	69.361	48.119	69.361	0.43144	11553000	11553000	0	263
NaN	0.77931	NaN	NaN	NaN	NaN	NaN	NaN	NaN	NaN	NaN	NaN	NaN	NaN	NaN	NaN	NaN	NaN	NaN	NaN	NaN	NaN	NaN	NaN	NaN	NaN	NaN	NaN	NaN	NaN	NaN	NaN	NaN	NaN	NaN	NaN	S	4			0.821958	0.000682722	73.984	53.891	53.589	0.27759	19160000	16390000	2769900	264
1.3015	NaN	0.23107	NaN	NaN	NaN	NaN	NaN	NaN	NaN	NaN	NaN	NaN	NaN	NaN	NaN	NaN	NaN	NaN	NaN	NaN	NaN	NaN	NaN	NaN	NaN	NaN	NaN	NaN	NaN	NaN	NaN	NaN	NaN	NaN	NaN	S	4			0.693526	0.00298484	55.975	29.427	55.975	-0.017561	25998000	15758000	10240000	268
0.97847	0.66373	0.6477	0.61936	0.65329	0.57171	0.48388	0.85533	0.67662	0.7872	0.55704	0.52879	NaN	0.2768	0.13205	0.076203	0.086375	NaN	0.9332	0.81832	NaN	0.64244	0.65532	0.62636	0.70718	0.4847	0.59135	0.642	0.64917	0.39796	0.38023	0.43806	0.18511	0.21206	0.1415	0.14695	S	3			1	4.86631e-11	255.72	114.07	255.72	-0.138	3372300000	2150800000	1221500000	188
NaN	NaN	NaN	NaN	NaN	NaN	NaN	0.7705	0.5853	NaN	0.59368	NaN	NaN	NaN	0.79706	NaN	0.61015	NaN	NaN	NaN	NaN	NaN	NaN	NaN	0.72694	NaN	NaN	0.61791	NaN	NaN	NaN	NaN	NaN	0.84337	NaN	0.82037	S	3			0.974105	7.6576e-05	65.438	65.438	48.597	-0.65837	89626000	54085000	35541000	159
NaN	NaN	NaN	NaN	NaN	NaN	NaN	NaN	NaN	NaN	NaN	NaN	NaN	NaN	NaN	NaN	NaN	NaN	1.2998	NaN	1.9736	NaN	NaN	NaN	NaN	NaN	NaN	NaN	NaN	NaN	NaN	NaN	NaN	NaN	NaN	NaN	S	3			0.804945	0.000604071	76.817	51.695	76.817	-0.041821	18703000	7502400	11201000	43
NaN	NaN	NaN	NaN	NaN	NaN	NaN	NaN	NaN	NaN	NaN	NaN	NaN	NaN	NaN	NaN	NaN	NaN	NaN	0.26249	NaN	NaN	NaN	NaN	NaN	NaN	NaN	NaN	NaN	NaN	NaN	NaN	NaN	NaN	NaN	NaN	S	3			0.854693	0.000979769	84.734	62.193	84.734	-0.16205	23374000	7755400	15619000	45
NaN	NaN	NaN	NaN	NaN	NaN	NaN	NaN	NaN	NaN	NaN	NaN	NaN	NaN	NaN	NaN	NaN	NaN	NaN	NaN	NaN	NaN	NaN	NaN	1.0582	NaN	1.0561	NaN	NaN	NaN	1.1221	1.195	NaN	NaN	0.88479	NaN	S	4			0.99854	1.01897e-06	74.665	63.088	74.665	-0.18369	49787000	23055000	26733000	763
0.88436	0.78435	1.4807	1.0185	0.56911	1.0138	0.54399	1.2242	0.64348	0.39441	0.56349	0.60592	0.84372	0.78911	0.63526	NaN	0.40584	0.55441	1.1155	0.76506	0.68231	0.85631	0.69435	NaN	NaN	NaN	NaN	NaN	NaN	NaN	NaN	NaN	NaN	NaN	NaN	NaN	S	3			1	0.00115551	212.35	148.65	212.35	-0.19693	218540000	130070000	88470000	831
0.88637	0.9808	0.87132	0.93896	0.96319	1.1358	0.88069	1.3834	1.1252	0.61552	0.9525	0.78294	1.0738	1.1107	0.96502	1.2541	0.89939	0.99101	1.08	0.93274	1.0637	0.87392	0.98763	0.84204	0.81203	1.026	0.78156	0.84299	1.1537	0.9527	0.80832	0.84966	0.89086	0.92423	0.95235	1.0456	S	2			1	6.47852e-20	166.22	140.87	166.22	0.56753	1552300000	780160000	772160000	417
NaN	0.64187	0.58961	0.56598	0.5868	0.6353	0.5207	0.67989	NaN	0.57873	0.43892	NaN	0.40648	0.3222	0.31442	0.21619	0.14284	NaN	0.95447	0.52139	0.60373	0.55621	NaN	NaN	NaN	0.27824	0.30936	NaN	NaN	0.64145	0.39904	NaN	0.38631	NaN	NaN	NaN	S	2			0.957238	9.6958e-05	103.13	51.523	98.253	-0.074352	223110000	147170000	75937000	435
0.92403	NaN	NaN	NaN	NaN	NaN	NaN	NaN	NaN	NaN	NaN	NaN	NaN	NaN	NaN	NaN	NaN	NaN	NaN	NaN	NaN	NaN	NaN	NaN	NaN	NaN	NaN	NaN	NaN	NaN	NaN	NaN	NaN	NaN	NaN	NaN	S	3			0.999904	8.85826e-05	207.83	161.83	207.83	-0.17041	15417000	9489700	5927100	367
0.86	0.81106	0.6314	0.69533	0.71843	0.79568	0.96309	0.92597	0.83739	0.99784	0.71777	0.66022	0.85712	0.72476	0.82898	0.78537	NaN	0.47642	0.93568	0.70467	0.84102	0.67581	0.5359	NaN	NaN	NaN	NaN	NaN	NaN	0.60917	NaN	0.61348	0.63995	NaN	NaN	NaN	S	2			1	0.00243386	78.505	48.501	78.505	0.46169	201980000	114120000	87853000	670
NaN	NaN	NaN	NaN	NaN	NaN	NaN	NaN	NaN	NaN	NaN	NaN	NaN	NaN	NaN	NaN	NaN	NaN	1.0163	NaN	NaN	NaN	NaN	NaN	0.67913	NaN	0.42288	NaN	0.72979	NaN	NaN	NaN	NaN	NaN	NaN	NaN	S	3			0.98475	9.64866e-05	68.134	51.541	68.134	-0.29665	51827000	29700000	22127000	720
NaN	NaN	NaN	NaN	NaN	NaN	NaN	NaN	NaN	NaN	NaN	NaN	NaN	NaN	NaN	NaN	NaN	NaN	NaN	NaN	NaN	NaN	NaN	NaN	NaN	NaN	NaN	NaN	NaN	NaN	NaN	NaN	NaN	NaN	NaN	NaN	S	2			0.306586	0.000328962	80.41	50.473	80.41	-0.37894	0	0	0	477
NaN	0.57394	0.83848	0.6216	0.88571	NaN	0.72425	0.90638	0.69884	0.75092	0.75332	NaN	NaN	NaN	0.454	0.21366	0.20428	NaN	NaN	NaN	NaN	NaN	NaN	NaN	NaN	NaN	NaN	0.62039	0.90753	0.59009	0.65658	0.49216	0.54407	NaN	NaN	0.42097	S	2			0.973938	3.22867e-07	131.41	104.48	119.43	0.35645	91287000	54675000	36612000	480
1.0387	0.68234	0.70124	0.6176	0.71852	0.77016	0.59316	0.87035	0.83118	0.66521	0.66666	0.73993	0.70867	0.7922	0.68497	0.65809	0.64309	0.55375	1.0907	0.80362	0.70693	0.66156	0.7536	0.68067	0.64051	0.63462	0.61269	0.6223	0.72951	0.64814	0.72281	0.61506	0.60338	0.66677	0.60774	0.58399	S	3			1	7.87839e-05	228.49	190.19	173.76	0.06091	1535000000	862630000	672380000	22
0.83335	0.76709	0.54965	0.57119	0.64517	0.71971	0.96347	0.63976	0.29059	0.75722	0.49375	0.3843	0.38296	0.28339	NaN	NaN	NaN	0.34981	NaN	NaN	NaN	NaN	NaN	NaN	NaN	NaN	NaN	NaN	NaN	NaN	NaN	NaN	NaN	NaN	NaN	NaN	S	3			0.999964	0.000256126	141.3	87.292	141.3	-0.28268	130910000	83992000	46919000	130
NaN	NaN	NaN	NaN	NaN	NaN	NaN	NaN	NaN	NaN	NaN	NaN	NaN	NaN	NaN	NaN	NaN	NaN	NaN	NaN	NaN	NaN	NaN	NaN	NaN	NaN	NaN	NaN	NaN	NaN	NaN	NaN	NaN	NaN	NaN	NaN	S	3			1	7.9879e-11	88.045	67.806	75.225	0.27559	710210000	0	710210000	25
NaN	NaN	NaN	NaN	NaN	NaN	NaN	NaN	NaN	NaN	NaN	NaN	NaN	NaN	NaN	NaN	NaN	NaN	NaN	NaN	NaN	NaN	NaN	NaN	NaN	NaN	NaN	NaN	NaN	NaN	NaN	NaN	NaN	NaN	NaN	NaN	S	3			1	7.9879e-11	88.045	67.806	75.225	0.27559	710210000	0	710210000	27
NaN	NaN	NaN	NaN	NaN	NaN	NaN	NaN	NaN	NaN	NaN	NaN	NaN	NaN	NaN	NaN	NaN	NaN	NaN	NaN	NaN	NaN	NaN	NaN	NaN	NaN	NaN	NaN	NaN	NaN	NaN	NaN	NaN	NaN	NaN	NaN	S	2			0.999883	0.00124106	90.614	61.369	90.614	-0.22628	23197000	23197000	0	6
0.90803	0.65764	0.62244	0.66331	0.65132	0.60922	0.53653	0.75988	0.76066	0.72525	0.62286	0.71996	0.52633	0.45099	0.36656	0.23295	0.19072	0.15034	1.0155	0.59605	0.63249	0.62833	0.6126	0.6207	0.62875	0.68695	0.57195	0.68946	0.70314	0.51409	0.67604	0.48605	0.31622	0.26973	0.2501	0.21886	S	3			1	0.000122971	326.89	256	174.42	-0.69184	3808000000	2316800000	1491100000	920
NaN	NaN	NaN	NaN	NaN	NaN	NaN	NaN	NaN	NaN	NaN	NaN	NaN	NaN	NaN	NaN	NaN	NaN	NaN	NaN	NaN	NaN	NaN	NaN	NaN	NaN	NaN	NaN	NaN	0.60074	0.58983	0.41054	0.70224	0.53753	0.80227	NaN	S	3			0.962854	0.000433442	100.09	66.036	76.678	0.43396	28171000	18532000	9639600	230
NaN	NaN	NaN	NaN	NaN	NaN	NaN	NaN	NaN	NaN	NaN	NaN	NaN	NaN	NaN	NaN	NaN	NaN	NaN	NaN	NaN	NaN	NaN	NaN	NaN	NaN	NaN	NaN	NaN	NaN	NaN	NaN	NaN	NaN	NaN	NaN	S	2			0.977495	0.000142902	108.63	63.972	93.424	0.17206	15873000	15873000	0	905
0.89211	1.0875	0.85613	0.63458	0.58626	0.94544	0.85414	1.0928	0.61747	0.92831	0.77029	0.68696	0.73283	0.83101	0.67944	1.433	NaN	NaN	1.0417	0.79822	0.89259	0.69784	0.93924	0.6303	0.65676	0.64026	0.65152	0.78538	0.82738	0.66447	0.73115	0.56844	0.51139	0.49504	0.43945	0.43632	S	3			1	0.000243512	228.49	176.88	109.87	0.6514	575020000	324710000	250310000	47
1.1196	0.59619	0.67516	0.98641	0.72436	0.4974	0.39025	0.43607	0.38737	0.28337	0.19642	NaN	NaN	NaN	NaN	NaN	NaN	NaN	1.0144	0.6421	0.49383	0.56265	0.55361	0.52706	0.39383	0.24634	NaN	0.25468	0.26432	NaN	NaN	NaN	NaN	NaN	NaN	NaN	S	3			1	5.43479e-16	209.85	158.12	209.85	0.031675	758580000	519440000	239150000	277
NaN	NaN	NaN	NaN	NaN	NaN	NaN	NaN	NaN	NaN	NaN	NaN	NaN	NaN	NaN	NaN	NaN	NaN	NaN	NaN	NaN	NaN	NaN	NaN	NaN	NaN	NaN	NaN	NaN	NaN	NaN	NaN	NaN	NaN	NaN	NaN	S	2			0.999917	0.000529131	95.981	56.976	95.981	-0.74954	1537500	1537500	0	119
NaN	NaN	NaN	NaN	NaN	NaN	NaN	NaN	NaN	NaN	NaN	NaN	NaN	NaN	NaN	NaN	NaN	NaN	NaN	NaN	NaN	NaN	NaN	NaN	NaN	NaN	NaN	NaN	NaN	NaN	NaN	NaN	NaN	NaN	NaN	NaN	S	3			0.999994	0.000371879	159.2	90.973	159.2	0.063145	0	0	0	9
1.1007	0.68033	0.70495	0.63023	0.63617	0.7258	0.57057	0.88371	0.75366	0.55318	0.62712	0.63951	0.53775	0.52842	0.3532	NaN	NaN	0.055127	1.101	0.73108	0.61762	0.69096	0.68104	0.71228	0.67128	0.59889	0.59209	0.57248	0.78739	0.49148	0.69436	0.5247	0.46993	0.31254	0.19503	0.13645	S	2			1	0.00165569	135.55	70.746	67.252	-0.079223	935110000	574290000	360820000	21
NaN	NaN	NaN	NaN	NaN	NaN	NaN	NaN	NaN	NaN	NaN	NaN	NaN	NaN	NaN	NaN	NaN	NaN	NaN	NaN	NaN	NaN	NaN	NaN	NaN	NaN	NaN	NaN	NaN	NaN	NaN	NaN	NaN	NaN	NaN	NaN	S	3			1	1.33294e-10	122.84	108.78	119.2	0.10637	3030200000	0	3030200000	942
NaN	NaN	NaN	NaN	NaN	NaN	NaN	NaN	NaN	NaN	NaN	NaN	NaN	NaN	NaN	NaN	0.44058	NaN	NaN	0.77384	NaN	NaN	0.76204	0.81612	NaN	NaN	0.81116	0.64482	0.81352	NaN	0.53281	0.84542	NaN	0.5756	NaN	NaN	S	3			0.690745	1.88352e-11	114.92	92.78	112.47	-0.088326	471370000	292670000	178700000	461
1.0745	NaN	0.79112	0.76957	NaN	NaN	NaN	0.99818	0.94371	0.85609	NaN	0.78042	0.75749	0.67511	0.57941	0.52518	NaN	NaN	1.1636	0.84832	0.90232	NaN	0.78007	0.74869	NaN	0.76412	NaN	NaN	NaN	0.73362	0.74804	0.65333	NaN	NaN	0.54824	0.51668	S	3			0.988859	3.69465e-37	170.5	170.5	163.6	0.60753	4768800000	2662100000	2106800000	462
NaN	NaN	NaN	NaN	0.84421	NaN	NaN	NaN	NaN	NaN	NaN	NaN	NaN	NaN	NaN	NaN	NaN	0.40248	NaN	NaN	NaN	0.78632	NaN	NaN	0.79631	NaN	0.7698	0.74766	NaN	NaN	NaN	NaN	0.61763	NaN	NaN	NaN	S	3			0.69398	7.18418e-22	155.31	128.96	123.32	0.005017	1124900000	663420000	461520000	464
1.2913	1.6346	1.6789	NaN	NaN	NaN	NaN	2.1204	NaN	2.1847	3.0485	2.7648	3.3913	3.2641	NaN	NaN	1.9359	NaN	NaN	NaN	NaN	NaN	NaN	1.3172	1.527	1.3758	NaN	1.666	NaN	NaN	1.9429	NaN	1.5762	NaN	NaN	0.97034	S	3			0.992685	0.000191845	69.422	54.493	63.436	-0.0062702	134080000	50734000	83342000	160
NaN	NaN	NaN	NaN	NaN	NaN	NaN	NaN	NaN	NaN	NaN	NaN	NaN	NaN	NaN	NaN	NaN	NaN	NaN	NaN	NaN	NaN	NaN	NaN	NaN	NaN	NaN	NaN	NaN	NaN	NaN	NaN	NaN	NaN	NaN	NaN	S	2			0.843422	0.000331177	87.429	48.034	81.651	1.1425	0	0	0	10
NaN	NaN	NaN	NaN	NaN	NaN	NaN	NaN	NaN	NaN	NaN	NaN	NaN	NaN	NaN	NaN	NaN	NaN	NaN	NaN	NaN	NaN	NaN	NaN	NaN	NaN	NaN	NaN	NaN	NaN	NaN	NaN	NaN	NaN	NaN	NaN	S	2			0.975091	7.28887e-07	127.83	77.608	102.47	-0.21428	0	0	0	11
1.356	0.85827	1.1086	NaN	1.1179	0.64796	0.81736	1.5005	1.5776	0.99984	0.98692	1.3962	0.76201	1.8468	1.4471	2.0023	4.3699	3.6841	0.94005	0.58583	1.5895	0.67316	0.42702	NaN	NaN	NaN	NaN	NaN	NaN	0.43831	0.34072	0.51381	1.1114	2.3421	0.42808	2.7147	S	3			0.999977	0.000808988	181.51	122.35	150.36	0.29541	348250000	201430000	146830000	483
NaN	NaN	NaN	NaN	NaN	NaN	NaN	NaN	NaN	NaN	NaN	NaN	NaN	NaN	NaN	NaN	NaN	NaN	NaN	NaN	NaN	NaN	NaN	NaN	NaN	NaN	NaN	NaN	NaN	NaN	NaN	NaN	NaN	NaN	NaN	NaN	S	3			0.581394	0.00286359	143.43	105.23	103.6	-0.072256	14591000	5896500	8695000	486
0.67392	0.85827	0.67096	0.57189	0.48928	0.64796	0.81736	0.56747	0.72355	0.99984	0.48338	NaN	0.76201	0.41921	0.72272	1.0353	0.2111	0.66609	1.0084	0.54525	1.8809	0.85477	0.55774	NaN	NaN	NaN	NaN	NaN	NaN	0.43831	0.34072	0.98016	0.59373	0.18901	0.65127	0.40367	S	3			1	0.00280939	212.55	179.18	212.55	-0.48563	425440000	250460000	174990000	493
1.1242	0.73227	0.73061	0.67845	0.79024	0.75558	0.71993	0.89155	0.87124	0.72904	0.67579	0.81033	0.98571	1.2843	1.153	1.4266	1.4077	1.4813	1.0647	0.98786	0.95253	0.85504	0.86212	0.87706	0.86212	0.86574	0.87113	0.65352	NaN	NaN	NaN	NaN	NaN	NaN	NaN	NaN	S	3			0.999999	0.000730444	205.31	168.38	205.3	0.13739	669820000	339980000	329840000	466
NaN	NaN	NaN	NaN	NaN	NaN	NaN	NaN	NaN	NaN	NaN	NaN	NaN	NaN	NaN	NaN	NaN	NaN	NaN	NaN	NaN	NaN	NaN	NaN	NaN	NaN	NaN	NaN	NaN	NaN	NaN	NaN	NaN	NaN	NaN	NaN	S	3			0.498406	0.00144947	154.15	124.62	154.15	0.10721	0	0	0	471
NaN	NaN	NaN	NaN	1.3443	NaN	1.3667	3.3713	NaN	NaN	NaN	1.1258	NaN	NaN	NaN	1.6167	NaN	NaN	NaN	NaN	NaN	NaN	NaN	NaN	NaN	NaN	NaN	NaN	NaN	NaN	NaN	NaN	NaN	NaN	NaN	NaN	S	3			1	0.000343762	176.85	129.77	122.78	-0.88433	54133000	13968000	40164000	205
1.1186	0.67136	0.55098	0.49817	NaN	NaN	NaN	NaN	NaN	NaN	NaN	NaN	NaN	NaN	NaN	NaN	NaN	NaN	1.1034	0.73947	0.55689	0.45092	0.43199	NaN	NaN	NaN	NaN	NaN	NaN	NaN	NaN	NaN	NaN	NaN	NaN	NaN	S	3			0.990144	9.83856e-08	110.44	91.438	94.234	0.12614	4942100000	3631900000	1310200000	247
1.0808	0.81319	0.6817	0.6806	0.83239	0.86819	0.6484	0.72169	0.81361	0.70442	NaN	NaN	0.37058	NaN	NaN	NaN	NaN	NaN	NaN	0.50687	0.7565	NaN	NaN	0.71993	0.6741	0.70206	0.68141	0.54069	0.77368	0.48511	0.57526	0.35504	0.31836	0.36884	0.31211	0.32004	S	3			1	2.68003e-18	228.49	181.27	184.66	0.71362	378260000	271180000	107070000	485
1.0375	0.69894	0.75786	0.66896	0.68601	0.77869	0.6159	0.88603	0.77914	0.71628	0.65026	0.73397	0.91372	0.86129	0.88769	0.90374	0.63204	0.78148	1.0961	0.67941	0.68095	0.62839	0.73136	0.41977	0.6816	0.63725	0.65934	0.68869	0.78512	0.68063	0.65475	0.78781	0.69102	0.43208	0.77685	0.46142	S	3			1	2.05126e-129	352.64	288.11	352.64	0.057592	6600500000	3709600000	2890900000	494
1.2255	0.55371	NaN	0.70985	0.70146	0.30503	0.72243	0.31799	2.0938	1.4199	0.53516	0.55586	1.1274	0.39547	NaN	0.71806	NaN	0.46836	1.3292	NaN	2.8903	0.67592	NaN	0.95316	0.60342	0.43627	0.43135	0.33582	0.36855	0.73902	1.0479	0.61866	0.41812	0.90721	0.46449	0.78924	S	3			0.996068	0.00480768	70.334	39.22	42.068	-0.052459	491500000	291910000	199590000	451
1.2255	0.65205	0.7176	0.72846	0.86572	0.5424	0.50351	0.74749	0.99624	0.50696	0.75486	0.55586	0.52621	0.39547	0.96291	0.99093	1.682	0.46836	1.3292	NaN	2.8903	0.67592	NaN	0.95316	0.60342	0.45544	0.43135	0.33582	0.36855	0.73902	1.0479	0.61866	0.41812	0.90721	0.46449	0.78924	S	3			0.996068	0.000471868	90.853	64.875	42.068	-0.052459	736650000	434760000	301880000	453
1.2255	0.65205	0.47133	0.44256	0.4422	0.65372	0.32653	0.74749	0.39785	0.84842	0.34672	0.58505	0.77025	0.42094	0.54808	0.71806	1.0259	0.31733	1.4288	1.6039	NaN	NaN	NaN	1.3596	1.0206	0.8611	0.93076	0.93749	1.1158	1.2803	1.5475	1.2135	1.3849	1.7188	1.7404	2.0088	S	3			0.994661	0.00034811	106.76	80.645	93.381	0.075496	683390000	399060000	284330000	455
0.90295	0.73601	0.52675	0.47791	0.47588	0.3875	NaN	0.38232	0.2653	NaN	NaN	NaN	NaN	NaN	NaN	NaN	NaN	NaN	NaN	NaN	NaN	NaN	NaN	NaN	NaN	NaN	NaN	NaN	NaN	NaN	NaN	NaN	NaN	NaN	NaN	NaN	S	3			1	0.000149007	237.44	172.64	231.07	-0.10803	37560000	24515000	13045000	422
0.99579	0.75627	0.5531	0.67324	0.91339	0.55546	0.534	0.70069	0.60651	0.55027	0.45028	0.44837	0.52784	0.53296	0.36081	0.28758	0.26365	0.1874	1.1053	0.74348	0.77227	0.64927	0.54896	0.49882	0.60813	0.54279	0.59865	0.52685	0.6596	0.63929	0.45561	0.4203	0.32924	0.29085	0.25276	0.23619	S	4			1	0.000871214	129.75	115.2	78.615	0.11375	8822900000	5465800000	3357100000	21
0.93608	1.0244	0.6649	0.77499	0.62457	0.74524	0.76128	0.88426	0.84616	0.60518	0.55784	0.61126	0.71234	0.64325	0.73289	0.72608	0.78211	1.5454	0.99095	0.70069	0.66198	0.79463	0.65253	0.65262	0.61574	0.60068	0.75059	0.57645	0.72837	0.50862	0.63963	0.48782	0.43776	0.64705	0.59329	0.67497	S	3			1	1.84575e-16	328.54	235.2	247.54	-0.04242	2585100000	1456300000	1128900000	66
0.90285	0.67852	0.66932	0.58292	0.62705	0.63462	0.48915	0.83813	0.66237	0.61147	0.59361	0.61587	0.69477	0.69901	0.67903	0.64956	0.64278	0.6247	0.88337	0.59661	0.60592	0.56903	0.61886	0.6395	0.59513	0.5684	0.58412	0.5634	0.74502	0.50366	0.67458	0.6294	0.63212	0.57332	0.63109	0.64692	S	2			1	6.78837e-07	122.39	86.869	122.39	-0.076918	2944200000	1656800000	1287400000	1168
NaN	NaN	NaN	NaN	NaN	NaN	NaN	NaN	NaN	NaN	NaN	NaN	NaN	NaN	NaN	NaN	NaN	NaN	NaN	NaN	NaN	NaN	NaN	1.6462	NaN	2.4413	NaN	NaN	NaN	2.2744	3.0261	NaN	NaN	NaN	NaN	1.076	S	3			0.999781	0.000329323	185.95	141.9	96.067	-1.1681	26172000	8885800	17286000	186
1.1297	1.1258	0.87663	0.7183	0.8466	0.93629	0.52168	1.3182	1.0477	0.52036	1.0291	1.3955	1.3165	1.4575	1.1995	1.3368	1.2572	1.5254	1.25	0.93856	0.76269	0.5735	0.83364	0.88176	0.78396	0.66563	0.71011	NaN	0.98979	0.63734	1.0805	0.82617	1.1501	1.1436	1.1787	1.4233	S	3			1	3.57726e-08	281.32	227.04	222.18	-0.032192	290040000	143280000	146750000	190
0.95531	0.69148	0.77242	0.60522	0.7457	0.81657	0.60714	1.0053	0.84902	0.59065	0.68016	0.66322	0.77634	0.88831	0.74816	0.85271	0.8064	0.81684	1.0092	0.731	0.68593	0.70804	0.6187	0.76713	0.76502	0.70215	0.72001	0.69743	1.0779	0.76818	0.8569	0.82884	0.84337	0.80875	0.95673	0.8803	S	2			1	1.70585e-54	254.94	200.68	96.708	-0.33585	850810000	463620000	387190000	107
1.0439	0.77117	0.87643	0.61466	0.79487	1.0656	1.0258	0.8114	0.95175	1.8615	0.83275	0.71402	1.2396	0.74118	0.91624	1.5457	0.39065	0.60258	1.2749	0.64034	1.5199	0.62136	0.48005	1.4496	0.89552	0.74968	0.77178	0.71457	0.75909	0.55954	0.41079	0.66811	0.66807	0.30022	0.7996	0.40834	S	3			1	9.50241e-68	391.93	331.57	192.15	-0.01039	1880200000	754760000	1125400000	113
1.2127	1.9118	2.2302	1.9899	1.2969	2.2134	1.294	2.6461	2.3537	1.7587	1.0373	2.1441	1.4395	2.2326	2.0505	1.8586	2.0726	0.99212	1.3092	1.0991	1.6233	1.0547	0.55454	1.8729	1.7693	1.7064	1.9376	1.7598	2.057	1.7441	1.9544	1.843	1.4332	1.7632	1.9616	1.9072	S	3			1	5.7113e-16	320.94	274.15	217.02	0.31009	862270000	370130000	492130000	164
0.88641	0.72335	0.7185	0.62313	0.64686	0.75424	0.7112	0.86578	0.67396	0.61761	0.64775	0.57355	0.70016	0.69554	0.64679	0.73728	0.57065	0.71195	0.84964	0.69489	0.74075	0.63326	0.58442	0.61315	0.62815	0.62765	0.62168	0.60115	0.72321	0.55338	0.63838	0.61865	0.68038	0.5746	0.60638	0.58708	S	3			1	1.8461e-17	330.13	282.9	63.691	0.23773	40153000000	22422000000	17731000000	214
0.98253	0.70406	NaN	0.57068	0.63647	0.60291	NaN	NaN	NaN	NaN	NaN	NaN	0.14905	NaN	NaN	NaN	NaN	NaN	1.3394	0.70894	NaN	0.50006	0.78796	NaN	NaN	0.46808	NaN	NaN	NaN	0.2881	NaN	NaN	NaN	0.10003	0.057742	NaN	S	3			1	0.00038033	97.395	70.192	63.691	0.23773	650840000	431930000	218900000	222
NaN	1.0544	NaN	0.52377	0.50538	0.93012	NaN	0.8211	NaN	0.69017	NaN	NaN	NaN	NaN	NaN	NaN	NaN	NaN	NaN	0.76756	NaN	0.72641	NaN	NaN	0.43611	0.59906	NaN	NaN	NaN	NaN	NaN	NaN	NaN	NaN	NaN	NaN	S	4			0.969869	1.45561e-10	126.04	80.691	60.272	-0.17556	67061000	37934000	29127000	9
NaN	NaN	NaN	NaN	NaN	NaN	NaN	NaN	NaN	NaN	NaN	NaN	NaN	NaN	NaN	NaN	NaN	NaN	NaN	NaN	NaN	NaN	NaN	NaN	NaN	NaN	NaN	NaN	NaN	NaN	NaN	NaN	NaN	NaN	NaN	NaN	S	3			0.493043	3.48643e-22	156.87	104.68	105.96	-0.63212	0	0	0	12
NaN	NaN	NaN	NaN	NaN	NaN	NaN	NaN	NaN	NaN	NaN	NaN	NaN	NaN	NaN	1.644	NaN	NaN	NaN	NaN	NaN	NaN	NaN	0.80259	0.76412	0.86622	0.77943	0.7638	0.80676	0.60568	0.80675	0.74609	0.94512	0.92226	1.1121	1.1589	S	2			0.999893	2.51856e-24	180.44	116.06	163.92	-0.072198	2369300000	48170000	2321100000	135
0.96138	0.68238	0.88173	0.69954	0.67073	0.79596	0.57583	0.94101	0.88189	0.65093	0.978	1.1417	0.86695	1.1068	1.0834	1.2209	0.81713	0.80547	0.99489	0.79231	0.61271	0.63201	0.80605	0.8294	0.73215	0.64681	0.58354	0.6474	0.83858	0.67734	0.74125	0.72562	0.74168	0.70001	0.79626	0.76669	S	2			0.999999	2.51856e-24	180.76	164.23	155.11	-0.053049	3724200000	800740000	2923500000	137
0.96918	NaN	NaN	0.61749	0.71618	0.57351	0.50347	0.79973	0.58581	0.41781	0.65913	0.41837	0.36762	0.2153	0.16283	0.093267	NaN	NaN	NaN	NaN	NaN	NaN	NaN	0.67727	0.70827	0.58939	0.56621	0.57606	0.67816	0.46279	0.41481	0.32314	0.20699	NaN	NaN	0.10542	S	2			1	1.1493e-10	148.06	123.37	148.06	-0.17376	400340000	266070000	134270000	295
1.0805	0.71257	0.73171	0.60738	0.66674	0.60265	0.46078	0.65369	0.47551	0.25038	0.20749	0.056202	NaN	NaN	NaN	NaN	NaN	NaN	1.0471	0.74776	0.49657	0.66014	0.63611	0.6386	0.52691	0.47663	0.28916	0.34037	0.31089	0.10251	0.069055	NaN	NaN	NaN	NaN	NaN	S	3			0.999932	0.00174027	145.69	107.55	136.96	-0.20849	638330000	410390000	227940000	1126
NaN	NaN	0.73171	NaN	NaN	NaN	NaN	NaN	NaN	NaN	NaN	NaN	NaN	NaN	NaN	NaN	NaN	NaN	NaN	NaN	NaN	NaN	NaN	NaN	NaN	NaN	NaN	NaN	NaN	NaN	NaN	NaN	NaN	NaN	NaN	NaN	S	3			0.5	0.00185525	110.08	84.603	110.08	-0.16759	13196000	7535900	5659900	1128
1.0117	0.71131	0.71172	0.71377	0.74733	0.73873	0.67561	0.90088	0.82985	0.71472	0.73588	NaN	0.77799	0.85367	0.77361	0.77954	0.71028	0.65696	NaN	0.77078	0.69217	NaN	NaN	0.69198	NaN	NaN	0.72489	0.69605	0.83403	0.71968	0.82876	0.68632	0.69195	0.73132	0.72489	NaN	S	2			0.99579	3.33982e-10	147.84	82.95	114.56	-0.19154	366740000	210630000	156110000	601
2.5115	0.81925	0.80614	0.66963	0.76598	NaN	NaN	0.84785	1.151	0.8718	0.76076	1.0085	0.62652	NaN	NaN	NaN	NaN	NaN	NaN	NaN	NaN	NaN	NaN	NaN	NaN	1.19	NaN	1.3835	0.88	NaN	NaN	0.59765	NaN	NaN	NaN	NaN	S	3			0.999181	7.18595e-05	80.835	52.245	58.758	0.31477	150750000	75921000	74826000	509
NaN	NaN	NaN	NaN	NaN	NaN	NaN	NaN	NaN	NaN	NaN	NaN	NaN	NaN	NaN	NaN	NaN	NaN	NaN	NaN	NaN	NaN	NaN	NaN	NaN	NaN	NaN	NaN	NaN	NaN	NaN	NaN	NaN	NaN	NaN	NaN	S	3			0.495426	2.85594e-05	98.552	63.624	76.378	-0.23536	0	0	0	486
NaN	NaN	NaN	NaN	NaN	0.77517	NaN	NaN	NaN	0.80185	NaN	NaN	NaN	NaN	NaN	NaN	NaN	NaN	NaN	NaN	NaN	0.71413	NaN	NaN	NaN	NaN	NaN	NaN	NaN	NaN	NaN	NaN	NaN	NaN	NaN	NaN	S	3			0.786086	2.85594e-05	98.552	63.624	71.685	0.40351	50811000	28480000	22331000	488
1.1004	0.73909	0.72012	0.7199	0.68843	0.79669	0.63473	0.77148	0.67173	0.41366	0.43074	0.23647	0.093134	0.067826	0.084048	0.045095	0.070912	0.059528	1.0414	0.71523	0.5603	0.7007	0.64842	0.64903	0.67989	0.49769	0.5255	0.5193	0.53956	0.25269	0.24253	0.15162	0.17168	0.13214	NaN	NaN	S	3			0.999995	0.000238954	202.61	202.61	188.48	-0.099584	1338900000	881300000	457620000	432
0.59265	0.96708	0.79064	0.76016	NaN	NaN	NaN	NaN	NaN	0.86491	NaN	0.74325	1.0861	NaN	NaN	NaN	NaN	0.89478	NaN	NaN	NaN	NaN	NaN	NaN	NaN	NaN	NaN	NaN	NaN	NaN	NaN	NaN	NaN	NaN	NaN	NaN	S	4			0.880764	0.000616421	48.226	29.811	45.137	0.36433	104830000	56239000	48589000	147
0.94283	NaN	NaN	NaN	NaN	NaN	NaN	NaN	NaN	NaN	NaN	NaN	NaN	NaN	NaN	NaN	NaN	NaN	NaN	NaN	NaN	NaN	NaN	NaN	NaN	NaN	NaN	NaN	NaN	NaN	NaN	NaN	NaN	NaN	NaN	NaN	S	3			0.5	0.00615182	106.76	78.432	106.76	0.12759	5619800	2915800	2704000	394
0.94283	NaN	NaN	NaN	NaN	0.86072	0.92442	NaN	1.0996	0.84931	0.66582	0.95018	0.80982	NaN	0.98324	NaN	NaN	0.71911	NaN	NaN	NaN	NaN	NaN	NaN	NaN	NaN	NaN	NaN	NaN	NaN	NaN	NaN	NaN	NaN	NaN	NaN	S	3			0.98586	0.00615182	106.76	78.432	102.73	0.40353	45662000	23176000	22486000	396
NaN	NaN	NaN	NaN	NaN	NaN	NaN	NaN	NaN	NaN	NaN	NaN	NaN	NaN	NaN	NaN	NaN	NaN	NaN	NaN	NaN	NaN	NaN	NaN	NaN	NaN	NaN	NaN	NaN	NaN	NaN	NaN	NaN	NaN	NaN	NaN	S	2			0.43814	6.94833e-05	80.316	53.973	80.316	0.22922	0	0	0	409
1.1457	0.65431	0.6616	NaN	0.63331	0.76962	0.71219	0.89605	0.72289	0.56583	0.52743	0.34651	NaN	0.22089	NaN	NaN	NaN	NaN	1.1668	0.74652	0.67366	0.56351	0.64539	0.70628	0.61303	0.66285	0.65905	0.48169	0.66743	0.41043	0.33041	0.18985	NaN	0.1508	NaN	NaN	S	3			1	9.85759e-11	313.59	277.97	229.48	0.52924	1462600000	930120000	532480000	414
0.84822	0.82704	0.67857	NaN	NaN	NaN	NaN	NaN	NaN	NaN	NaN	NaN	NaN	NaN	NaN	NaN	NaN	NaN	NaN	NaN	0.55101	0.59999	NaN	NaN	NaN	NaN	NaN	NaN	NaN	NaN	NaN	NaN	NaN	NaN	NaN	NaN	S	3			1	0.00368769	139.28	64.439	101.9	0.53317	68392000	41577000	26815000	916
0.99964	0.90112	0.72557	0.81128	0.73093	0.72357	0.92818	0.82133	0.97443	0.6884	0.71772	0.65531	0.66036	0.4832	NaN	NaN	0.30243	0.27134	1.1106	0.79931	0.76615	0.77791	0.63291	NaN	NaN	NaN	NaN	NaN	NaN	NaN	NaN	NaN	NaN	NaN	NaN	NaN	S	3			0.999999	6.93135e-05	261.03	195.73	261.03	0.48033	914720000	519050000	395670000	206
NaN	NaN	NaN	NaN	NaN	NaN	NaN	NaN	NaN	NaN	NaN	NaN	NaN	NaN	NaN	NaN	NaN	NaN	NaN	NaN	NaN	NaN	NaN	NaN	NaN	NaN	NaN	NaN	NaN	NaN	NaN	NaN	NaN	NaN	NaN	NaN	S	4			0.378901	0.00483176	43.583	26.159	43.583	-0.30187	0	0	0	865
1.189	0.94914	0.9	0.6844	0.75924	NaN	NaN	0.84559	NaN	NaN	NaN	NaN	NaN	NaN	NaN	NaN	NaN	NaN	NaN	NaN	NaN	NaN	NaN	NaN	NaN	NaN	NaN	NaN	NaN	NaN	NaN	NaN	NaN	NaN	NaN	NaN	S	4			0.619174	0.000584961	45.703	27.618	45.703	-0.39392	132510000	68193000	64318000	866
NaN	NaN	NaN	0.49882	0.68598	0.83682	NaN	0.99412	NaN	NaN	NaN	0.61221	NaN	NaN	NaN	NaN	NaN	NaN	NaN	NaN	NaN	NaN	NaN	NaN	NaN	NaN	NaN	NaN	0.83237	0.77042	NaN	0.6473	NaN	0.32556	NaN	NaN	S	2			0.997892	7.27565e-46	199.37	148.99	199.37	0.39969	30383000	21058000	9325200	1053
NaN	NaN	NaN	NaN	NaN	NaN	NaN	NaN	NaN	NaN	NaN	NaN	NaN	NaN	NaN	NaN	NaN	NaN	NaN	NaN	NaN	NaN	NaN	NaN	NaN	NaN	NaN	NaN	NaN	NaN	NaN	NaN	NaN	NaN	NaN	NaN	S	2			0.329742	6.01106e-08	129.08	80.466	129.08	0.60324	0	0	0	1058
NaN	NaN	NaN	NaN	NaN	NaN	NaN	NaN	NaN	NaN	NaN	NaN	NaN	NaN	NaN	NaN	NaN	NaN	NaN	NaN	NaN	NaN	NaN	NaN	NaN	NaN	NaN	NaN	NaN	NaN	NaN	NaN	NaN	NaN	NaN	NaN	S	2			0.601725	6.01106e-08	129.08	80.466	91.617	0.36559	3454400	3454400	0	1059
NaN	NaN	NaN	NaN	NaN	NaN	NaN	NaN	NaN	NaN	0.65606	0.61221	NaN	NaN	NaN	NaN	NaN	NaN	NaN	NaN	NaN	NaN	NaN	NaN	NaN	NaN	NaN	NaN	0.83237	NaN	NaN	0.6473	NaN	0.32556	NaN	NaN	S	2			0.91348	7.27565e-46	199.37	148.99	121.59	0.52787	14110000	9023600	5086900	1061
NaN	NaN	NaN	NaN	NaN	NaN	NaN	NaN	NaN	NaN	NaN	NaN	NaN	NaN	NaN	0.7493	NaN	NaN	NaN	0.87808	0.54054	NaN	NaN	1.3442	1.1711	0.35339	0.40141	0.46029	0.64344	0.45916	1.9758	1.3406	1.3331	0.33052	0.1834	6.1769	S	3			0.862034	2.65231e-06	113.65	67.912	113.65	-0.30093	271440000	164520000	106920000	983
NaN	NaN	NaN	NaN	NaN	NaN	NaN	NaN	NaN	NaN	NaN	NaN	NaN	NaN	NaN	NaN	NaN	NaN	NaN	NaN	NaN	NaN	NaN	0.75821	0.51889	0.35339	0.40141	0.46029	0.64344	0.45916	0.5184	0.32219	NaN	0.33052	0.1834	0.34326	S	3			0.66195	0.00417517	60.334	42.77	50.392	-0.31073	130920000	87545000	43377000	990
NaN	NaN	NaN	NaN	NaN	NaN	NaN	NaN	NaN	NaN	NaN	NaN	NaN	NaN	NaN	NaN	NaN	0.49661	NaN	0.87808	NaN	NaN	NaN	NaN	NaN	NaN	NaN	NaN	NaN	NaN	NaN	NaN	NaN	NaN	NaN	NaN	S	3			0.67536	1.24535e-05	97.081	77.356	67.478	0.77019	50365000	28250000	22115000	993
NaN	NaN	NaN	NaN	NaN	NaN	NaN	NaN	NaN	NaN	NaN	NaN	NaN	NaN	NaN	0.7493	NaN	NaN	NaN	NaN	0.54054	NaN	1.2933	1.3442	1.1711	NaN	NaN	NaN	NaN	1.2302	NaN	1.3406	0.2694	NaN	NaN	NaN	S	3			0.973626	2.65231e-06	113.65	67.912	105.04	-0.23179	104280000	61729000	42552000	994
NaN	NaN	NaN	NaN	NaN	NaN	NaN	NaN	NaN	NaN	NaN	NaN	NaN	NaN	NaN	NaN	NaN	NaN	0.93408	0.73816	0.65469	0.62368	0.74033	NaN	NaN	NaN	NaN	NaN	NaN	NaN	NaN	NaN	NaN	0.24902	0.24869	NaN	S	3			1	0.00149678	177.44	140.99	177.44	0.12515	66265000	39862000	26403000	266
NaN	NaN	NaN	NaN	NaN	NaN	NaN	NaN	NaN	NaN	NaN	NaN	NaN	NaN	NaN	NaN	NaN	NaN	NaN	NaN	NaN	NaN	NaN	NaN	NaN	NaN	NaN	NaN	NaN	NaN	NaN	NaN	NaN	NaN	NaN	NaN	S	3			0.494362	7.54281e-06	79.383	57.143	50.924	0.25085	0	0	0	1177
NaN	NaN	NaN	0.94995	NaN	0.69613	NaN	1.2186	1.0044	NaN	0.72516	NaN	NaN	NaN	NaN	NaN	NaN	NaN	1.2924	1.9852	NaN	0.87976	1.4052	NaN	NaN	NaN	NaN	NaN	NaN	NaN	NaN	NaN	NaN	NaN	NaN	NaN	S	3			1	7.16518e-05	90.882	56.495	90.882	-0.61526	174090000	109930000	64156000	714
NaN	NaN	NaN	NaN	NaN	NaN	NaN	NaN	NaN	NaN	NaN	NaN	NaN	NaN	NaN	NaN	NaN	NaN	1.5945	0.77274	0.74979	0.71274	0.45346	NaN	NaN	NaN	NaN	NaN	NaN	NaN	NaN	NaN	NaN	NaN	NaN	NaN	S	3			0.836088	0.0044834	108.68	54.199	108.68	-0.89492	26067000	14293000	11774000	1068
0.83122	0.97119	NaN	0.63151	NaN	NaN	0.63724	NaN	NaN	NaN	NaN	NaN	NaN	NaN	NaN	NaN	NaN	NaN	1.5945	0.77274	0.74979	0.71274	0.45346	NaN	NaN	NaN	NaN	NaN	NaN	NaN	NaN	NaN	NaN	NaN	NaN	NaN	S	3			0.994722	0.0044834	108.68	54.199	95.273	-1.5571	41058000	21820000	19237000	1071
NaN	NaN	NaN	NaN	NaN	NaN	NaN	NaN	NaN	NaN	NaN	NaN	NaN	NaN	NaN	NaN	NaN	NaN	NaN	NaN	NaN	NaN	NaN	NaN	NaN	NaN	NaN	NaN	NaN	NaN	NaN	NaN	NaN	NaN	NaN	NaN	S	3			1	0.000593936	185.57	139.92	185.57	1.8875	3547600	0	3547600	300
NaN	NaN	1.3483	0.70639	NaN	NaN	NaN	NaN	0.81682	NaN	NaN	NaN	NaN	NaN	NaN	NaN	NaN	NaN	NaN	NaN	NaN	NaN	NaN	NaN	NaN	NaN	NaN	NaN	NaN	NaN	NaN	NaN	NaN	NaN	NaN	NaN	S	3			0.992643	0.000398195	58.802	41.371	58.802	1.0467	35178000	15174000	20004000	335
1.1073	NaN	NaN	NaN	NaN	NaN	NaN	NaN	NaN	NaN	NaN	NaN	NaN	NaN	NaN	NaN	NaN	0.69006	NaN	NaN	NaN	NaN	NaN	0.77641	NaN	NaN	NaN	NaN	NaN	NaN	NaN	NaN	NaN	NaN	NaN	NaN	S	2			0.706499	0.000153105	97.235	64.94	97.235	0.35606	35214000	18080000	17133000	423
0.78548	0.89712	0.86772	0.8141	1.1279	1.0031	0.4145	0.72591	0.82561	0.89007	0.69546	0.97154	0.68401	NaN	0.76423	0.91928	0.83445	0.875	NaN	0.77847	NaN	0.89799	0.75044	1.4901	NaN	0.99341	0.74596	0.87806	NaN	0.46355	1.0905	0.74772	0.51861	NaN	0.76746	0.88204	S	2			0.94657	0.000137772	98.253	72.272	95.954	0.18001	353490000	194150000	159340000	425
NaN	NaN	NaN	NaN	NaN	NaN	NaN	NaN	NaN	NaN	NaN	NaN	NaN	NaN	NaN	NaN	NaN	NaN	1.0469	NaN	0.85843	NaN	NaN	NaN	NaN	NaN	NaN	NaN	NaN	NaN	NaN	NaN	NaN	NaN	NaN	NaN	S	2			0.852478	8.83612e-05	101.53	58.903	101.53	-0.20648	17689000	8561300	9127800	427
NaN	0.65003	0.59501	0.55767	0.62914	0.64594	0.47803	0.88573	0.70605	0.25694	0.502	0.45561	0.20015	0.22235	NaN	0.082358	0.13255	0.075242	1.2553	0.89635	0.35719	0.53649	0.87655	0.74573	0.6467	0.44965	0.47256	0.50067	0.95473	NaN	NaN	NaN	NaN	NaN	NaN	NaN	S	3			0.999991	0.00335723	198.52	157.82	198.52	0.23986	557240000	352750000	204490000	1362
NaN	NaN	NaN	NaN	NaN	NaN	NaN	1.3099	NaN	NaN	NaN	NaN	NaN	NaN	NaN	NaN	NaN	NaN	NaN	NaN	NaN	NaN	NaN	NaN	NaN	NaN	NaN	NaN	NaN	NaN	NaN	NaN	NaN	NaN	NaN	NaN	S	3			0.568272	2.16466e-07	80.842	67.237	69.088	0.15378	159670000	65693000	93973000	1132
NaN	NaN	NaN	NaN	NaN	NaN	NaN	1.3099	NaN	NaN	NaN	NaN	NaN	NaN	NaN	NaN	NaN	NaN	NaN	NaN	NaN	NaN	NaN	NaN	NaN	NaN	NaN	NaN	NaN	NaN	NaN	NaN	NaN	NaN	NaN	NaN	S	3			0.568272	3.33714e-06	69.088	55.203	69.088	0.15378	159670000	65693000	93973000	1133
NaN	NaN	NaN	NaN	NaN	NaN	NaN	1.3099	NaN	NaN	NaN	NaN	NaN	NaN	NaN	NaN	NaN	NaN	NaN	NaN	1.9116	NaN	NaN	NaN	NaN	NaN	NaN	NaN	NaN	1.5866	NaN	1.2402	NaN	NaN	NaN	NaN	S	3			0.760692	2.16466e-07	80.842	67.237	45.518	-0.28413	367800000	143620000	224180000	1134
NaN	NaN	NaN	NaN	NaN	NaN	1.1867	NaN	NaN	NaN	NaN	NaN	NaN	NaN	NaN	NaN	NaN	NaN	NaN	NaN	1.9116	NaN	NaN	NaN	NaN	NaN	NaN	NaN	NaN	1.5866	NaN	1.2402	NaN	NaN	NaN	NaN	S	3			0.987685	2.16466e-07	80.842	67.237	65.194	0.08093	307300000	119240000	188060000	1137
0.88481	NaN	NaN	0.73031	0.94162	0.99021	0.97366	0.99989	1.184	0.72881	0.9249	0.76677	NaN	0.96593	0.73107	0.64652	NaN	NaN	1.0979	NaN	NaN	0.94036	NaN	NaN	NaN	0.93886	0.86055	0.9301	1.1864	1.5256	0.57322	0.80858	0.65616	NaN	NaN	NaN	S	3			0.999985	0.000469241	238.88	167.85	196.37	-0.10389	474340000	256470000	217870000	1013
0.97363	0.83595	0.70023	0.53768	0.69519	NaN	0.57583	0.72948	0.53692	0.30757	NaN	0.4231	0.34641	0.30553	0.19073	NaN	NaN	NaN	0.86882	NaN	0.77848	0.77148	0.48763	0.57213	0.65912	0.62282	0.49985	0.50197	0.59829	0.79327	0.44437	0.40218	0.27645	0.2537	0.18533	NaN	S	2			0.999999	9.71596e-56	220.16	147.29	193.38	0.58269	793640000	578670000	214970000	1029
1.4657	0.58707	NaN	0.42093	0.69976	0.49687	NaN	0.69425	0.57014	1.0373	0.35249	1.8465	0.41689	1.8005	0.50051	0.45099	0.60422	NaN	1.1857	0.57967	NaN	0.53481	0.65253	0.69414	0.64857	NaN	NaN	NaN	0.62637	0.75962	0.74341	0.54763	NaN	0.98604	0.73708	0.8437	S	3			0.994021	0.00122498	186.17	140.63	116.52	-0.8741	142140000	83259000	58886000	507
1.2423	0.58707	NaN	NaN	0.69976	0.49687	NaN	0.69425	0.57014	NaN	0.35249	0.63498	0.41689	0.78006	0.50051	0.45099	0.60422	NaN	NaN	NaN	NaN	NaN	NaN	NaN	NaN	NaN	NaN	NaN	NaN	NaN	NaN	NaN	NaN	NaN	NaN	NaN	S	3			0.915585	0.00138576	186.17	140.63	87.696	-0.25757	73396000	44282000	29114000	509
1.2258	1.0641	1.094	1.0305	1.5798	1.2185	1.121	1.3869	NaN	1.5906	0.8076	0.53758	NaN	1.2074	0.91388	NaN	0.76407	0.95476	1.016	0.88411	1.41	0.96295	1.0913	NaN	NaN	0.97306	0.91386	1.1291	1.2715	1.533	0.48297	1.4635	1.0667	1.0369	0.97651	0.80226	S	2			1	3.42894e-06	124.04	84.973	124.04	-0.23874	764550000	362880000	401670000	952
0.73998	0.59298	0.77492	0.42758	1.1775	0.52484	0.46835	1.4961	0.64089	0.51863	1.1926	NaN	0.94264	1.1757	0.91388	1.0681	0.76407	0.95476	1.016	0.88411	1.41	0.96295	1.0913	0.56821	NaN	0.57226	0.66087	1.1291	0.68096	1.533	1.131	0.77442	0.75552	0.795	1.0418	0.80226	S	3			1	7.16011e-07	97.713	76.42	89.507	0.47671	926340000	465750000	460580000	955
NaN	NaN	NaN	NaN	NaN	NaN	NaN	NaN	NaN	NaN	NaN	NaN	NaN	NaN	NaN	NaN	NaN	NaN	NaN	NaN	NaN	NaN	NaN	NaN	NaN	NaN	NaN	NaN	NaN	NaN	NaN	NaN	NaN	NaN	NaN	NaN	S	3			0.329	0.000403034	121.26	83.607	121.26	-0.45511	0	0	0	889
NaN	NaN	NaN	NaN	NaN	NaN	NaN	NaN	NaN	NaN	NaN	NaN	NaN	NaN	NaN	NaN	NaN	NaN	NaN	NaN	NaN	NaN	NaN	NaN	NaN	NaN	NaN	NaN	NaN	NaN	NaN	NaN	NaN	NaN	NaN	NaN	S	3			0.470071	0.000403034	138.97	104.71	138.97	0.069976	0	0	0	892
NaN	NaN	NaN	NaN	NaN	NaN	NaN	NaN	NaN	NaN	NaN	NaN	NaN	NaN	NaN	NaN	NaN	NaN	NaN	NaN	NaN	NaN	NaN	NaN	NaN	NaN	NaN	0.86572	NaN	NaN	NaN	NaN	NaN	NaN	NaN	NaN	S	3			0.753418	0.00011278	67.214	43.341	67.214	-0.28444	3994800	2059900	1934900	461
1.0274	NaN	NaN	NaN	NaN	NaN	NaN	NaN	NaN	NaN	NaN	NaN	NaN	NaN	NaN	NaN	NaN	NaN	NaN	NaN	NaN	NaN	NaN	1.0903	1.0097	NaN	1.067	NaN	0.90177	1.0141	NaN	1.0192	0.88105	NaN	0.68935	1.0925	S	3			0.791506	0.000101263	68.411	51.265	52.318	-0.28282	60251000	29721000	30531000	463
1.2423	0.58707	NaN	0.42093	0.69976	0.49687	NaN	0.69425	0.57014	NaN	0.35249	0.63498	0.41689	0.78006	0.50051	0.45099	0.60422	NaN	1.1857	0.57967	NaN	0.53481	0.65253	0.69414	0.64857	NaN	NaN	NaN	0.62637	0.75962	0.74341	0.54763	NaN	0.98604	0.73708	0.8437	S	3			0.999951	0.00138576	186.17	140.63	164.13	-0.33694	133240000	79487000	53755000	503
NaN	NaN	NaN	0.69234	0.44762	NaN	0.63798	NaN	0.55834	NaN	NaN	NaN	NaN	NaN	0.81793	1.2627	NaN	NaN	NaN	NaN	NaN	NaN	NaN	NaN	NaN	NaN	NaN	NaN	NaN	NaN	NaN	NaN	0.62838	NaN	NaN	NaN	S	3			0.86427	0.00110299	86.213	59.921	73.273	-0.049397	48185000	28677000	19508000	368
1.1341	0.70916	0.50991	0.49672	0.73369	0.61662	0.4216	0.55878	0.54223	0.56461	0.48029	0.65716	0.6449	0.84645	0.79002	0.74909	0.8148	0.95585	1.0586	0.73739	0.58623	0.41275	0.45597	NaN	NaN	0.44349	0.49995	0.52409	0.73457	0.48887	0.71324	0.70254	NaN	0.62389	0.83997	0.72629	S	2			0.996011	0.000163234	130.47	85.12	92.952	-0.088892	517130000	299850000	217280000	370
1.163	NaN	NaN	NaN	NaN	NaN	NaN	NaN	NaN	NaN	NaN	NaN	NaN	NaN	NaN	NaN	NaN	NaN	NaN	NaN	NaN	NaN	NaN	0.77616	0.7833	0.63598	NaN	0.55135	0.58938	NaN	0.58055	0.60226	0.50001	0.53306	0.58392	0.50973	S	3			0.999999	6.71437e-05	335.32	265.89	212.68	0.076823	107990000	60742000	47245000	596
NaN	NaN	NaN	NaN	NaN	NaN	NaN	NaN	NaN	NaN	NaN	NaN	NaN	NaN	NaN	NaN	NaN	NaN	0.98606	0.27497	0.096271	0.057966	NaN	NaN	NaN	NaN	NaN	NaN	NaN	NaN	NaN	NaN	NaN	NaN	NaN	NaN	S	2			0.945363	0.000145407	107.65	28.832	107.65	0.174	140130000	114750000	25385000	487
0.87935	0.2245	NaN	NaN	NaN	NaN	NaN	NaN	NaN	NaN	NaN	NaN	NaN	NaN	NaN	NaN	NaN	NaN	0.98606	0.27497	0.096271	0.057966	NaN	NaN	NaN	NaN	NaN	NaN	NaN	NaN	NaN	NaN	NaN	NaN	NaN	NaN	S	2			0.69823	0.000353267	93.766	19.889	83.883	1.1512	151870000	115010000	36857000	489
NaN	NaN	NaN	NaN	NaN	NaN	NaN	NaN	NaN	NaN	NaN	NaN	NaN	NaN	NaN	NaN	NaN	NaN	NaN	NaN	NaN	NaN	NaN	NaN	NaN	NaN	NaN	NaN	NaN	NaN	NaN	NaN	NaN	NaN	NaN	NaN	S	3			0.999999	1.12473e-07	262.24	227.16	262.24	-0.25112	19912000	0	19912000	352
1.3904	0.70216	0.73075	NaN	NaN	0.54901	0.46035	NaN	0.38832	0.23462	NaN	NaN	NaN	NaN	NaN	NaN	NaN	NaN	NaN	NaN	NaN	NaN	0.63083	NaN	NaN	NaN	NaN	NaN	NaN	NaN	NaN	NaN	NaN	NaN	NaN	NaN	S	3			0.99999	6.92706e-05	217.19	184.1	217.19	-0.18622	149620000	124660000	24957000	269
NaN	NaN	0.80786	NaN	NaN	NaN	NaN	NaN	NaN	NaN	NaN	NaN	NaN	NaN	NaN	NaN	NaN	NaN	NaN	NaN	NaN	NaN	NaN	NaN	NaN	NaN	NaN	NaN	NaN	NaN	NaN	NaN	NaN	NaN	NaN	NaN	S	2			0.812394	0.000357138	101.78	58.19	65.956	-0.23998	7845500	6448000	1397500	271
1.1334	0.90923	0.43674	0.55061	0.51451	0.41502	0.37838	0.33982	0.27162	0.19998	NaN	NaN	NaN	NaN	NaN	NaN	NaN	NaN	1.1211	0.74662	0.42688	NaN	NaN	0.4185	0.35236	0.25767	0.35598	0.35498	0.29933	0.11768	NaN	NaN	NaN	NaN	NaN	0.081189	S	3			1	5.27023e-05	311.88	244.99	263.07	-0.48818	624850000	408580000	216270000	741
1.0344	0.71002	0.67071	0.58236	0.62976	0.63722	0.5488	0.8556	0.69984	0.6039	0.56851	0.58251	0.70178	0.52603	0.54161	0.50057	0.30638	0.34874	0.97242	0.67516	0.67353	0.65409	0.54147	0.44482	0.55094	0.6661	0.59784	0.58663	0.72163	0.49798	0.5098	0.53857	0.55682	0.34857	0.42522	0.34759	S	2			1	2.05441e-06	130.64	80.6	63.691	-0.052443	919360000	553400000	365960000	815
0.74859	NaN	0.77034	NaN	1.0944	NaN	1.4108	1.991	NaN	NaN	NaN	NaN	NaN	1.3132	0.99516	0.66952	0.4446	0.20617	NaN	0.65025	NaN	NaN	1.1489	NaN	NaN	1.355	1.3564	NaN	1.3878	1.4135	1.3282	1.2021	NaN	0.80592	NaN	NaN	S	3			0.999988	1.99376e-16	302.25	214.38	254.89	0.29881	145690000	60568000	85125000	1227
NaN	0.69538	0.63766	0.8557	1.1664	0.91198	0.56276	1.0673	0.94767	NaN	NaN	0.81921	0.44828	0.45559	NaN	NaN	NaN	NaN	NaN	NaN	NaN	NaN	NaN	0.7221	0.59091	0.83689	0.89001	1.0689	1.1917	NaN	1.3728	1.2652	0.50868	NaN	1.379	1.8477	S	3			0.970384	0.00154844	57.985	41.079	57.985	0.2314	222970000	112670000	110300000	440
1.0296	0.75483	0.90249	0.72566	0.90758	0.84626	0.7657	1.0353	0.89707	0.70605	0.75093	0.75835	0.77268	0.83717	0.74226	0.7315	0.66752	0.61171	1.1174	0.94145	0.71384	0.78801	0.76151	0.77168	0.73922	0.76249	0.75531	0.77637	0.91901	0.75011	0.79896	0.74226	0.67652	0.67488	0.7661	0.64575	S	3			0.999998	2.06741e-06	313.54	266.24	246.64	-0.35052	993360000	527690000	465670000	243
NaN	0.99646	NaN	NaN	NaN	NaN	1.1755	NaN	NaN	NaN	NaN	NaN	NaN	NaN	NaN	NaN	NaN	NaN	NaN	NaN	NaN	NaN	NaN	NaN	NaN	NaN	NaN	NaN	NaN	NaN	NaN	NaN	NaN	NaN	NaN	NaN	S	3			0.668533	7.16861e-05	66.889	49.027	58.462	-0.074004	35712000	24823000	10888000	1015
0.88139	NaN	NaN	0.93245	1.1273	NaN	NaN	NaN	1.4058	NaN	0.72767	NaN	NaN	NaN	NaN	NaN	NaN	NaN	NaN	NaN	NaN	NaN	1.0147	1.0087	NaN	0.68392	NaN	NaN	0.91547	NaN	NaN	NaN	NaN	NaN	NaN	NaN	S	3			0.778034	1.2562e-07	93.729	74.377	58.952	-0.28583	82758000	42025000	40733000	1017
0.91325	0.61121	0.56131	0.50425	0.61186	0.50408	0.34834	0.5545	0.40179	0.23722	0.14548	0.096317	NaN	NaN	NaN	NaN	NaN	NaN	NaN	0.6455	0.45371	0.58897	0.55379	0.53592	0.42907	0.28809	0.24835	0.23123	0.30959	0.048911	NaN	NaN	0.043219	NaN	NaN	0.026499	S	3			0.98175	8.40245e-05	190.53	110.22	127.3	-0.28204	1285800000	959670000	326090000	556
1.0695	0.5981	0.70601	0.58699	0.56339	0.70293	0.59792	0.32146	0.20131	0.21826	NaN	NaN	NaN	NaN	NaN	NaN	NaN	0.16484	0.98963	0.6679	0.57515	0.66739	0.51138	0.47229	0.49792	0.4461	NaN	NaN	NaN	NaN	NaN	NaN	NaN	NaN	NaN	NaN	S	3			0.999991	2.56064e-05	271.82	232.82	226.65	-0.35847	422580000	279040000	143540000	655
0.59973	NaN	NaN	NaN	NaN	NaN	NaN	NaN	NaN	NaN	NaN	NaN	NaN	NaN	NaN	NaN	NaN	NaN	NaN	NaN	NaN	NaN	NaN	0.66494	0.67019	NaN	0.68098	NaN	0.66811	0.96661	0.60999	NaN	NaN	0.76325	0.69306	1.0731	S	3			0.993592	0.000424723	69.071	40.289	60.541	-0.023519	55602000	30925000	24677000	882
NaN	NaN	NaN	0.52875	0.5332	0.65167	NaN	NaN	0.56444	0.41192	NaN	NaN	0.53293	NaN	NaN	NaN	NaN	NaN	NaN	NaN	NaN	NaN	NaN	NaN	NaN	NaN	NaN	NaN	NaN	NaN	NaN	NaN	NaN	NaN	NaN	NaN	S	3			0.926268	0.000760832	71.853	38.483	58.024	-0.22181	97004000	63543000	33460000	534
0.97245	0.71257	0.70977	0.52875	0.5332	0.65167	NaN	NaN	NaN	0.41192	NaN	0.4939	0.53293	NaN	NaN	0.38103	0.31645	0.21697	NaN	NaN	NaN	NaN	NaN	NaN	NaN	NaN	NaN	NaN	NaN	NaN	NaN	NaN	NaN	NaN	NaN	NaN	S	3			0.838543	8.648e-05	105.52	83.387	67.532	-0.2048	226780000	151080000	75705000	537
NaN	NaN	NaN	0.52875	0.5332	0.65167	NaN	NaN	0.56444	NaN	NaN	0.4939	NaN	NaN	NaN	0.38103	NaN	NaN	NaN	NaN	NaN	NaN	NaN	NaN	NaN	NaN	NaN	NaN	NaN	NaN	NaN	NaN	NaN	NaN	NaN	NaN	S	3			0.736472	0.000448678	71.853	38.483	67.532	-0.2048	94308000	63629000	30679000	539
1.1918	0.74722	0.65951	NaN	NaN	NaN	1.0588	0.89181	0.69732	NaN	NaN	0.47259	NaN	NaN	0.98034	0.60588	NaN	NaN	0.84638	NaN	NaN	0.64341	NaN	0.63737	NaN	NaN	NaN	NaN	NaN	NaN	NaN	NaN	NaN	NaN	NaN	NaN	S	2			1	0.00494475	75.788	75.788	72.29	-0.17149	50263000	31400000	18863000	781
NaN	NaN	NaN	NaN	NaN	NaN	NaN	NaN	NaN	NaN	NaN	NaN	NaN	NaN	NaN	NaN	NaN	NaN	1.3046	0.67498	NaN	NaN	0.6513	NaN	NaN	NaN	NaN	NaN	NaN	NaN	NaN	NaN	NaN	NaN	NaN	NaN	S	3			0.536775	0.000748251	125.68	68.635	109.11	0.42631	36534000	20577000	15957000	129
1.0047	0.71064	0.64421	0.60849	0.65464	0.65425	0.4652	0.68101	0.53223	0.29299	0.25117	0.10712	NaN	NaN	0.024428	NaN	NaN	NaN	1.0744	0.69669	0.58747	0.74283	0.61901	0.62619	0.54067	0.48146	0.36375	0.44874	0.44083	0.09431	NaN	0.075774	0.031805	NaN	NaN	NaN	S	2			0.999998	3.39948e-15	161.19	161.19	161.19	0.16115	4625200000	3218200000	1406900000	132
NaN	NaN	NaN	NaN	NaN	NaN	NaN	NaN	NaN	NaN	NaN	NaN	0.63066	0.83766	NaN	0.89474	0.5226	NaN	0.71223	NaN	NaN	NaN	NaN	NaN	NaN	NaN	NaN	NaN	NaN	1.1558	NaN	0.91637	0.72771	1.1601	NaN	NaN	S	3			0.999999	0.0060938	128.6	75.877	128.6	-0.46715	30442000	17783000	12658000	290
0.97115	0.83544	0.7137	0.78845	1.0003	0.94212	0.82037	0.9909	1.3458	0.85243	0.84789	0.55363	0.26229	0.52673	0.46485	0.46794	0.42983	0.56381	1.2528	0.88924	0.95557	0.8872	0.96207	NaN	NaN	NaN	NaN	NaN	NaN	0.42726	NaN	NaN	NaN	0.60514	0.62262	0.72811	S	4			0.975849	0.00140875	85.473	85.473	54.857	-0.059507	1435400000	842190000	593210000	758
1.062	0.70461	0.626	0.62837	0.72786	0.68328	0.51967	0.84979	0.63761	0.52206	0.58146	0.711	0.64928	0.68866	0.60292	0.56983	0.51412	0.47759	1.1623	0.70306	0.6462	0.61676	0.59849	0.61731	0.63933	0.64067	0.55262	0.60606	0.71466	0.49984	0.67697	0.54601	0.53172	0.48502	0.52964	0.50997	S	2			1	3.87089e-11	162.79	107.69	139.81	0.35987	5087200000	2997900000	2089300000	108
NaN	NaN	1.0628	1.0167	1.054	NaN	0.82575	NaN	0.94516	0.58983	0.50389	NaN	NaN	NaN	NaN	NaN	NaN	NaN	NaN	NaN	NaN	NaN	NaN	NaN	NaN	NaN	NaN	NaN	NaN	NaN	NaN	NaN	NaN	NaN	NaN	NaN	S	4			0.716749	0.000739466	44.616	31.745	42.301	0.40431	213460000	115250000	98211000	149
NaN	NaN	NaN	NaN	NaN	NaN	NaN	NaN	NaN	NaN	NaN	NaN	NaN	NaN	NaN	NaN	NaN	NaN	NaN	NaN	NaN	NaN	NaN	NaN	NaN	NaN	NaN	NaN	NaN	NaN	NaN	NaN	NaN	NaN	NaN	NaN	S	3			0.895754	2.98865e-05	60.33	48.418	48.283	-0.21422	11744000	0	11744000	171
NaN	NaN	NaN	NaN	NaN	NaN	NaN	NaN	NaN	NaN	NaN	NaN	NaN	NaN	NaN	NaN	NaN	NaN	NaN	NaN	NaN	NaN	NaN	NaN	NaN	NaN	NaN	NaN	NaN	NaN	NaN	NaN	NaN	NaN	NaN	NaN	S	3			0.99691	0.00184576	142.12	94.815	142.12	-0.1683	3412700	3412700	0	625
NaN	NaN	NaN	NaN	NaN	NaN	NaN	NaN	NaN	NaN	NaN	NaN	NaN	NaN	NaN	NaN	NaN	NaN	NaN	NaN	NaN	NaN	NaN	NaN	NaN	NaN	NaN	NaN	NaN	NaN	NaN	NaN	NaN	NaN	NaN	NaN	S	3			0.469844	0.00140756	51.688	29.873	45.844	-0.60786	0	0	0	491
NaN	NaN	NaN	NaN	NaN	NaN	NaN	NaN	NaN	NaN	NaN	NaN	NaN	NaN	NaN	NaN	NaN	NaN	NaN	NaN	NaN	NaN	NaN	NaN	NaN	NaN	NaN	NaN	NaN	NaN	NaN	NaN	NaN	NaN	NaN	NaN	S	3			0.232082	0.00140756	63.225	42.786	51.688	-0.63849	0	0	0	492
NaN	NaN	NaN	NaN	NaN	NaN	NaN	NaN	NaN	NaN	NaN	NaN	NaN	NaN	NaN	NaN	NaN	NaN	NaN	NaN	NaN	NaN	NaN	NaN	NaN	NaN	NaN	NaN	NaN	NaN	NaN	NaN	NaN	NaN	NaN	NaN	S	3			0.339564	0.000152864	64.377	36.663	52.522	-0.53493	0	0	0	494
NaN	NaN	NaN	0.90842	NaN	NaN	NaN	NaN	NaN	NaN	NaN	NaN	NaN	NaN	NaN	NaN	NaN	NaN	NaN	NaN	NaN	NaN	NaN	NaN	NaN	NaN	NaN	NaN	NaN	NaN	NaN	NaN	NaN	NaN	NaN	NaN	S	3			0.662857	0.000152864	65.887	43.093	54.047	-0.54558	380880000	230790000	150090000	495
NaN	NaN	NaN	NaN	NaN	NaN	NaN	NaN	NaN	NaN	NaN	NaN	NaN	NaN	NaN	NaN	NaN	NaN	NaN	NaN	NaN	NaN	NaN	NaN	NaN	NaN	NaN	NaN	NaN	NaN	NaN	NaN	NaN	NaN	NaN	NaN	S	3			0.261904	0.00101979	69.255	49.559	69.255	0.10107	0	0	0	497
NaN	NaN	NaN	NaN	NaN	NaN	NaN	NaN	NaN	NaN	NaN	NaN	NaN	NaN	NaN	NaN	NaN	NaN	NaN	NaN	NaN	NaN	NaN	NaN	NaN	NaN	NaN	NaN	NaN	NaN	NaN	NaN	NaN	NaN	NaN	NaN	S	4			0.496755	0.00057086	46.968	33.901	46.968	-0.2268	0	0	0	1304
NaN	NaN	NaN	NaN	NaN	NaN	NaN	NaN	NaN	NaN	NaN	NaN	NaN	NaN	NaN	NaN	NaN	NaN	NaN	NaN	NaN	NaN	NaN	NaN	NaN	NaN	NaN	NaN	NaN	NaN	NaN	NaN	NaN	NaN	NaN	NaN	S	4			0.496755	0.00057086	46.968	33.901	46.968	-0.2268	0	0	0	1306
0.9081	0.86217	0.76555	0.61121	0.7207	0.749	0.68811	0.93321	0.89427	0.70346	0.78397	0.69995	0.77412	0.90228	NaN	0.84437	0.68744	0.68623	NaN	NaN	NaN	NaN	NaN	0.64992	0.72948	0.74477	0.65454	0.86254	0.8709	0.63231	0.7745	0.72382	0.75446	0.75977	0.72438	0.76914	S	2			0.999861	1.35417e-08	122.89	105.85	96.707	0.31859	578810000	323850000	254960000	664
NaN	NaN	NaN	NaN	NaN	NaN	NaN	NaN	NaN	NaN	NaN	NaN	NaN	NaN	NaN	NaN	NaN	NaN	NaN	NaN	NaN	NaN	NaN	NaN	NaN	NaN	NaN	NaN	NaN	0.72024	NaN	NaN	NaN	NaN	NaN	NaN	S	2			1	0.00544956	78.69	15.981	78.69	0.52726	15205000	7559000	7645500	316
1.204	0.68102	1.1201	0.62239	0.73176	0.62639	0.71796	1.04	NaN	0.64119	0.73619	0.58953	0.71057	0.76763	0.60307	0.46499	0.61039	0.39209	NaN	NaN	NaN	NaN	NaN	0.6764	0.90536	0.76916	0.62712	0.71481	0.82699	0.71801	0.85164	0.73013	0.7609	0.54107	0.85883	0.84367	S	3			1	8.19158e-07	298.1	184.14	298.1	0.23211	406770000	235610000	171160000	289
NaN	NaN	NaN	NaN	NaN	NaN	NaN	NaN	NaN	NaN	NaN	NaN	NaN	NaN	NaN	NaN	NaN	NaN	NaN	NaN	NaN	NaN	NaN	NaN	NaN	NaN	NaN	NaN	NaN	NaN	NaN	NaN	NaN	NaN	NaN	NaN	S	2			0.601634	0.00266372	73.498	39.315	73.498	1.1064	16420000	0	16420000	297
NaN	NaN	NaN	1.1313	1.0107	NaN	NaN	1.3914	0.82334	1.098	0.98382	NaN	0.95883	0.88478	NaN	0.54167	NaN	NaN	NaN	NaN	0.86026	1.023	1.3044	NaN	NaN	NaN	NaN	NaN	NaN	NaN	NaN	NaN	NaN	NaN	NaN	NaN	S	2			0.99991	3.44042e-22	179.74	152.92	179.74	0.32012	341550000	173800000	167750000	299
1.0004	0.97541	NaN	0.7949	NaN	NaN	0.72258	NaN	NaN	NaN	NaN	NaN	NaN	NaN	NaN	NaN	0.25085	0.34945	NaN	NaN	1.018	NaN	0.56767	0.54038	0.68947	0.67145	0.6648	0.62563	NaN	NaN	0.35968	0.38606	0.37148	NaN	0.45551	NaN	S	2			0.999976	6.55396e-05	98.552	65.247	85.496	0.18595	136750000	76018000	60732000	2401
NaN	NaN	0.49693	NaN	NaN	NaN	NaN	NaN	NaN	NaN	NaN	NaN	NaN	NaN	NaN	NaN	NaN	NaN	NaN	NaN	0.90239	0.58469	NaN	NaN	NaN	NaN	NaN	NaN	NaN	NaN	NaN	NaN	NaN	NaN	NaN	NaN	S	3			0.999999	0.0045259	137.46	83.369	137.46	-3.3477	59743000	48545000	11199000	1940
0.99539	NaN	0.80548	0.75237	0.74452	0.9003	0.76443	0.96692	1.016	NaN	NaN	0.46673	0.27099	0.2379	NaN	NaN	NaN	NaN	0.92476	NaN	1.3925	0.86256	1.3137	0.74738	0.89734	0.90859	NaN	NaN	0.81431	0.48691	NaN	NaN	NaN	NaN	NaN	0.056228	S	3			0.999943	0.000177176	191.44	147.65	122.46	-1.0244	374660000	228670000	145990000	1639
0.94994	NaN	0.70045	NaN	NaN	NaN	NaN	1.0977	NaN	0.74096	0.89277	0.83656	1.0106	1.0426	0.63141	0.77925	0.64916	0.80603	NaN	NaN	1.3714	NaN	NaN	NaN	NaN	NaN	NaN	0.93436	0.68389	0.86051	1.0529	0.83415	0.75951	NaN	NaN	NaN	S	3			0.996288	1.08379e-20	127.49	111.51	109.98	0.4416	374580000	158930000	215650000	803
NaN	NaN	NaN	NaN	NaN	NaN	NaN	NaN	NaN	NaN	NaN	NaN	NaN	NaN	NaN	NaN	NaN	NaN	NaN	NaN	NaN	NaN	NaN	NaN	NaN	NaN	NaN	NaN	NaN	NaN	NaN	NaN	NaN	NaN	NaN	NaN	S	3			0.993251	0.00153974	145.46	83.353	145.46	2.2267	3792900	3792900	0	2294
NaN	NaN	NaN	0.53006	0.91535	1.148	NaN	1.1148	NaN	NaN	NaN	NaN	NaN	NaN	NaN	NaN	NaN	NaN	1.5424	NaN	NaN	NaN	NaN	0.83216	NaN	0.76059	0.766	NaN	1.1076	1.0006	NaN	NaN	NaN	NaN	NaN	NaN	S	4			0.968589	0.000453694	92.474	59.721	86.214	0.031914	127560000	66821000	60744000	122
NaN	NaN	NaN	NaN	NaN	NaN	NaN	NaN	NaN	NaN	NaN	NaN	NaN	NaN	NaN	NaN	NaN	NaN	NaN	NaN	NaN	NaN	NaN	NaN	NaN	NaN	NaN	NaN	NaN	NaN	NaN	NaN	NaN	NaN	NaN	NaN	S	4			0.530419	0.000559326	59.732	38.312	52.556	0.56126	11631000	5726500	5904900	126
NaN	NaN	NaN	NaN	NaN	NaN	NaN	NaN	NaN	NaN	NaN	NaN	NaN	NaN	NaN	NaN	NaN	NaN	NaN	NaN	NaN	NaN	0.80945	NaN	NaN	NaN	NaN	NaN	NaN	0.75316	NaN	NaN	NaN	NaN	NaN	NaN	S	3			0.699446	0.000136934	64.538	34.049	41.296	-0.32121	30193000	15696000	14496000	1002
1.1848	NaN	0.73993	0.93997	NaN	NaN	NaN	0.80026	NaN	0.63675	NaN	NaN	NaN	NaN	0.79005	NaN	0.80284	0.6924	1.132	0.60861	NaN	0.64132	NaN	1.0284	0.57724	NaN	0.60993	0.63754	0.82821	NaN	NaN	0.66439	NaN	NaN	NaN	0.8812	S	3			0.903297	9.53197e-06	79.029	57.353	74.742	0.21029	266620000	153840000	112780000	1003
1.0921	0.74837	NaN	0.52026	0.55933	0.54354	0.40308	0.51799	0.41932	0.43252	0.31453	NaN	NaN	NaN	NaN	NaN	NaN	NaN	1.0646	0.72392	0.58944	0.61618	0.57294	0.47051	0.35962	0.29006	0.13746	0.1555	0.13856	NaN	NaN	NaN	NaN	NaN	NaN	NaN	S	3			0.999998	0.000120423	219.23	184.48	195.83	0.20383	972820000	677300000	295530000	20
NaN	NaN	NaN	NaN	NaN	NaN	NaN	NaN	NaN	NaN	NaN	NaN	NaN	NaN	NaN	NaN	NaN	NaN	NaN	NaN	NaN	NaN	NaN	NaN	NaN	NaN	NaN	NaN	NaN	NaN	NaN	NaN	NaN	NaN	NaN	NaN	S	2			0.968457	0.000129916	108.72	44.005	108.72	-0.0019107	1649900	0	1649900	741
0.92392	0.74387	0.67683	0.66224	0.84992	0.92848	0.6293	1.1738	0.68226	1.2335	0.63815	0.97305	1.147	NaN	1.3015	1.2937	1.1144	0.89422	NaN	0.65605	3.5942	0.52932	0.57656	0.63583	0.62991	0.55745	0.51425	NaN	0.849	0.59437	0.98812	0.93406	NaN	1.195	1.1929	1.1164	S	3			1	0.000222211	162.39	135.13	149.82	0.19895	525120000	277350000	247780000	662
NaN	NaN	NaN	0.76233	0.95034	0.79022	1.0194	0.82766	0.99678	1.3545	NaN	0.45866	0.71018	0.424	0.60747	NaN	0.23364	0.4255	0.99745	0.70176	0.90986	0.78109	0.54362	NaN	NaN	NaN	NaN	NaN	NaN	NaN	NaN	NaN	NaN	NaN	NaN	NaN	S	2			0.906847	0.000491764	83.204	50.874	78.441	-0.09664	89030000	51275000	37756000	407
1.2228	NaN	NaN	NaN	NaN	NaN	NaN	NaN	NaN	NaN	NaN	NaN	NaN	NaN	NaN	NaN	NaN	NaN	NaN	NaN	NaN	NaN	NaN	NaN	0.62455	NaN	NaN	NaN	NaN	NaN	NaN	NaN	NaN	NaN	NaN	NaN	S	3			0.942477	0.00169536	56.681	26.609	56.25	-0.069947	22261000	11417000	10844000	589
1.0748	0.86055	0.67582	0.68284	0.6797	0.54758	0.50091	0.68239	0.48332	0.32252	0.23451	NaN	NaN	NaN	NaN	NaN	NaN	NaN	0.84633	1.0597	0.71882	0.59231	0.67474	0.49218	NaN	0.5515	0.30083	NaN	0.41201	NaN	NaN	NaN	NaN	NaN	NaN	NaN	S	3			1	3.81641e-09	183.6	144.36	183.6	0.40781	316480000	204320000	112150000	593
0.81474	0.74372	0.52815	0.70878	0.79139	0.73913	0.69095	0.82442	0.73667	0.51799	0.59806	0.94412	0.56274	0.56918	0.45068	0.63642	0.66349	0.67844	1.1592	0.8142	NaN	0.55557	0.64094	NaN	NaN	NaN	0.53482	NaN	NaN	0.59733	0.6944	0.63771	0.87262	0.55727	0.56072	NaN	S	2			0.999986	1.00368e-44	192.93	173.62	141	-0.47759	1901800000	1155400000	746450000	170
1.0761	0.65921	0.81508	0.56849	0.73377	0.74236	0.66769	0.92948	0.74684	0.51683	0.60239	0.89484	NaN	0.81224	0.4286	0.3445	0.26567	0.22011	1.0422	0.76858	0.56864	0.64881	0.65915	0.61016	0.58968	0.60666	NaN	0.57253	0.85813	0.43472	0.50646	0.56474	0.38991	0.27823	0.27342	0.25429	S	2			0.998168	8.25566e-68	215.73	215.73	133.58	-0.102	1421500000	878030000	543450000	173
0.97432	0.68382	0.69443	0.65767	0.66548	0.69821	0.61409	0.81025	0.68385	0.54119	0.49345	0.35017	0.2904	0.24104	0.17614	0.12565	0.089021	0.079113	1.0447	0.76546	0.67678	0.65343	0.67543	0.66952	0.648	0.5975	0.54907	0.52416	0.58173	0.38181	0.35146	0.24954	0.19265	0.14982	0.13143	0.10797	S	3			1	0.000229409	286.74	231.7	272.77	0.19916	13783000000	8900800000	4882200000	1474
NaN	NaN	NaN	NaN	NaN	NaN	NaN	NaN	NaN	NaN	NaN	NaN	NaN	NaN	NaN	NaN	NaN	NaN	NaN	NaN	NaN	NaN	NaN	NaN	NaN	NaN	0.85947	NaN	NaN	NaN	NaN	NaN	NaN	NaN	NaN	NaN	S	3			0.540384	0.00449184	47.991	27.946	47.991	-0.13646	6386200	3692900	2693200	2591
1.0513	0.73517	0.67669	0.73811	0.74509	0.76682	0.53528	0.76543	0.55023	0.40531	0.40096	0.37053	0.30532	0.33843	0.27422	0.21724	0.21284	0.17397	1.047	0.82663	0.59937	0.60691	0.62578	0.63897	0.55809	0.55646	0.43025	0.46787	0.49338	0.28168	0.42223	0.30727	0.35545	0.23818	0.24181	0.21646	S	3			1	5.7516e-06	263.45	215.77	225.68	0.13923	1213200000	756830000	456350000	886
NaN	NaN	NaN	NaN	NaN	NaN	NaN	NaN	1.1972	NaN	NaN	NaN	NaN	NaN	NaN	NaN	NaN	NaN	NaN	NaN	NaN	NaN	NaN	NaN	NaN	NaN	NaN	NaN	NaN	NaN	NaN	NaN	NaN	NaN	NaN	NaN	S	3			0.504434	0.000271648	57.222	45.514	43.501	0.33699	8856100	4304100	4551900	1028
1.0247	1.0767	0.84612	0.90251	1.0718	1.678	1.1979	1.3577	1.42	0.86289	0.92106	1.0417	0.94602	1.0336	0.79744	0.83332	0.59609	0.45851	1.1754	0.98107	2.3851	1.2838	1.3844	1.1714	0.85905	0.87643	1.0003	NaN	1.1666	1.5236	NaN	0.92205	NaN	NaN	0.6168	NaN	S	2			1	4.84147e-19	163.72	133.72	163.72	-0.53503	1556100000	742050000	814010000	1316
1.0898	0.64526	0.59244	0.57448	0.55661	0.55844	0.48485	0.65842	0.56431	0.41074	0.3856	0.40612	0.38461	0.44398	NaN	0.29404	0.26547	0.18358	1.0097	0.55289	0.5399	0.55135	0.55304	0.45462	NaN	0.45414	0.50816	0.54008	0.46423	0.39145	0.49285	0.39556	0.34023	0.36544	0.29856	0.27621	S	2			1	0.00036945	89.231	46.756	43.316	-0.12103	459710000	290350000	169360000	1433
0.91316	0.86646	0.59551	0.88793	0.82507	1.2683	0.81467	1.1793	0.9014	0.95156	NaN	NaN	0.92533	NaN	NaN	0.9332	0.671	NaN	1.2755	0.82339	NaN	0.83285	0.68099	0.89232	0.79805	1.0103	0.96389	0.96625	NaN	NaN	NaN	0.98435	0.67681	NaN	1.2292	NaN	S	3			0.999393	7.19189e-06	234.9	180.78	234.9	-0.028368	101420000	53301000	48117000	2166
NaN	NaN	NaN	NaN	NaN	NaN	NaN	NaN	NaN	NaN	NaN	0.62127	NaN	NaN	NaN	NaN	NaN	NaN	NaN	NaN	NaN	NaN	NaN	NaN	NaN	NaN	NaN	NaN	NaN	NaN	NaN	NaN	NaN	NaN	NaN	NaN	S	3			0.838532	0.000234183	142.19	98.96	142.19	-0.0093448	7008600	4372200	2636400	2168
0.95748	0.61182	0.76765	0.69096	0.76681	0.60812	0.70075	0.80209	0.81712	0.82315	0.68254	0.54836	0.48222	0.41804	0.39975	0.27966	0.17639	0.1252	0.90543	0.68295	0.65056	0.67591	0.65921	0.73252	0.66868	0.57502	0.75408	0.70654	0.85561	0.49816	0.57967	0.39237	0.36887	0.30886	0.23949	0.21602	S	3			1	9.05275e-07	293.15	232.85	276.39	0.081641	15391000000	8521200000	6870200000	983
NaN	NaN	NaN	NaN	NaN	NaN	NaN	NaN	0.88659	0.79091	NaN	0.54542	NaN	NaN	0.37151	NaN	NaN	NaN	NaN	NaN	NaN	NaN	0.62865	NaN	0.67883	NaN	NaN	NaN	NaN	NaN	NaN	NaN	NaN	NaN	NaN	NaN	S	2			0.836262	0.000185716	101.61	58.3	88.706	0.13816	650690000	398930000	251770000	985
0.99069	0.96657	1.0276	1.0089	1.1093	0.92009	0.83507	1.1177	1.1346	0.85364	0.88596	0.95378	1.0207	1.0801	0.95872	1.0291	0.94394	0.72273	1.0257	1.0941	1.0458	0.82776	0.77896	1.0036	0.92891	0.9698	0.96326	0.85194	0.9481	0.90486	0.99454	0.89837	0.91266	1.0246	0.97056	0.8099	S	3			1	7.98435e-37	200.19	145.44	171.13	-0.12448	4272900000	2308300000	1964600000	2509
0.9387	0.86059	0.96222	0.97621	1.2746	1.0625	1.1521	1.1856	1.2031	0.98317	0.96998	0.91787	0.95414	0.91812	0.87939	0.85882	0.58396	0.69496	1.1636	1.0973	1.1209	0.93212	0.87644	NaN	0.96708	1.0063	1.0423	0.93066	1.0327	1.0881	0.93614	0.8328	0.90229	0.6851	0.75719	0.64074	S	3			0.999999	7.48682e-07	189.45	155.26	188.92	0.095969	1058700000	545550000	513140000	2512
1.0577	0.71229	0.41628	0.58254	0.50707	0.45417	0.29346	0.36636	0.33674	0.14425	0.13662	NaN	NaN	NaN	NaN	NaN	NaN	NaN	1.2954	0.53235	0.38804	0.44349	0.49745	0.24956	0.2981	0.28228	NaN	NaN	0.22315	NaN	NaN	NaN	NaN	NaN	NaN	NaN	S	2			0.993315	0.00399185	64.249	36.791	47.618	-0.10538	189290000	121030000	68260000	932
0.98847	0.84604	0.83952	0.65254	0.79296	1.0837	0.60878	0.90328	1.0068	0.44843	0.94053	1.0917	0.85542	0.99313	0.8384	0.92859	1.1233	1.4811	1.0555	0.95316	0.56422	NaN	0.87267	0.9423	0.85056	0.81052	0.85949	0.67757	0.87425	0.97334	1.1471	0.90612	0.68809	1.0608	0.95952	1.255	S	3			1	8.09065e-08	297.55	249.83	231.62	0.051055	1323000000	667610000	655400000	2138
1.4452	0.83178	NaN	0.68748	0.82386	0.85459	0.86087	1.0197	1.1092	0.72314	NaN	1.0573	NaN	NaN	0.86611	1.0963	0.83769	0.8951	NaN	0.93882	NaN	0.71248	0.86737	NaN	NaN	NaN	NaN	NaN	1.366	1.2926	NaN	0.76157	0.81086	0.85223	NaN	1.0205	S	3			0.998008	2.44329e-05	92.633	68.355	60.938	-0.3292	216380000	113460000	102930000	2356
NaN	NaN	NaN	NaN	NaN	NaN	NaN	NaN	NaN	NaN	NaN	NaN	0.96644	NaN	NaN	NaN	NaN	NaN	NaN	NaN	NaN	NaN	NaN	NaN	NaN	NaN	NaN	NaN	NaN	NaN	NaN	NaN	NaN	NaN	NaN	NaN	S	3			0.778559	0.000226363	67.418	44.584	67.418	0.035655	11402000	5156800	6244900	2358
1.0789	NaN	NaN	NaN	NaN	NaN	NaN	NaN	0.66819	NaN	NaN	0.88455	0.5343	0.67781	0.51	0.44931	0.39919	NaN	0.9202	NaN	NaN	NaN	0.85183	NaN	NaN	NaN	NaN	NaN	NaN	NaN	NaN	NaN	NaN	NaN	NaN	NaN	S	3			1	9.10044e-06	202	167.9	202	-0.0087822	71211000	31241000	39970000	833
0.96763	0.62325	0.61863	0.64232	0.60946	0.62791	0.47749	0.59452	0.50646	0.40958	0.31796	0.18685	0.16708	0.19546	0.16326	0.16439	0.13026	0.11907	1.0039	0.60295	0.59324	0.57447	0.53579	0.47546	0.45135	0.51977	0.42669	0.42779	0.46171	0.19038	0.17995	0.15727	0.18212	0.14908	0.16437	0.16972	S	3			1	0.000115693	287.76	260.08	278.35	-0.11524	3835300000	2446000000	1389300000	1536
1.0783	0.69153	0.67212	NaN	1.0472	0.96363	1.2057	1.2356	1.248	0.82982	0.9171	0.86587	0.85987	0.88944	0.89867	0.73827	0.80544	0.69453	1.2716	0.6407	0.62287	0.72884	0.73498	0.5976	0.74576	NaN	0.76422	0.67632	0.84556	0.49279	0.54859	0.7327	0.51677	0.57046	NaN	NaN	S	3			1	0.000279009	245.5	176.18	138.25	0.50774	279080000	153940000	125140000	2496
1.1178	NaN	NaN	0.72393	NaN	NaN	NaN	NaN	NaN	NaN	NaN	NaN	NaN	NaN	NaN	NaN	NaN	NaN	NaN	NaN	NaN	NaN	1.0657	NaN	NaN	NaN	NaN	NaN	NaN	NaN	NaN	NaN	NaN	NaN	NaN	NaN	S	2			0.999995	3.54046e-12	144.27	108.41	139.04	-0.4531	43067000	29829000	13238000	1633
0.75854	NaN	0.55117	0.50378	0.65776	0.68196	0.55224	0.72374	0.56845	0.23849	0.34706	0.1695	NaN	NaN	0.070194	0.06397	0.086403	NaN	1.0494	0.80537	NaN	0.61656	0.69596	0.71471	0.64284	0.47947	0.43491	NaN	0.48597	NaN	NaN	NaN	NaN	NaN	NaN	NaN	S	3			0.999614	0.000327096	176.25	110.88	125.84	0.10645	293390000	202400000	90993000	1281
1.024	0.67005	0.83243	0.87682	0.93043	0.90722	0.77935	1.1843	1.119	0.87176	0.83801	0.28084	NaN	0.18282	0.16852	NaN	0.2258	0.27074	1.0496	0.72993	0.71193	0.87284	0.76759	0.73185	0.72568	0.75945	0.73391	0.73438	0.69096	0.24668	0.1969	0.13097	0.16682	0.17553	0.19658	0.23856	S	2			1	2.41709e-11	155.24	104.44	155.24	0.057142	612000000	375940000	236060000	1472
NaN	NaN	NaN	NaN	NaN	NaN	NaN	NaN	NaN	NaN	NaN	NaN	NaN	NaN	NaN	NaN	NaN	NaN	NaN	NaN	NaN	NaN	NaN	NaN	NaN	NaN	NaN	NaN	NaN	NaN	NaN	NaN	NaN	NaN	NaN	NaN	S	3			0.325055	0.00153492	55.588	33.188	55.588	-0.97716	0	0	0	1671
NaN	NaN	NaN	NaN	NaN	NaN	NaN	NaN	NaN	NaN	NaN	NaN	NaN	NaN	NaN	NaN	NaN	NaN	NaN	NaN	NaN	NaN	NaN	NaN	NaN	NaN	NaN	NaN	NaN	NaN	NaN	NaN	NaN	NaN	NaN	NaN	S	3			0.513119	3.80453e-06	88.071	68.672	72.568	-0.41613	4434300	4434300	0	157
NaN	NaN	NaN	NaN	NaN	NaN	NaN	NaN	NaN	NaN	NaN	NaN	NaN	NaN	NaN	NaN	NaN	NaN	NaN	NaN	NaN	NaN	NaN	NaN	NaN	NaN	NaN	0.75327	NaN	NaN	0.75759	NaN	0.64001	NaN	NaN	NaN	S	3			0.865286	3.80453e-06	88.071	68.672	63.937	-0.32197	98250000	65295000	32954000	158
NaN	NaN	NaN	NaN	NaN	NaN	NaN	NaN	NaN	NaN	NaN	NaN	NaN	NaN	NaN	NaN	NaN	NaN	NaN	NaN	1.0628	0.80574	0.72763	0.90303	0.76734	NaN	0.81612	0.75327	NaN	NaN	0.75759	2.8896	NaN	NaN	3.5964	NaN	S	3			0.90342	3.80453e-06	88.071	68.672	64.538	-0.34336	225330000	121490000	103840000	172
NaN	NaN	NaN	NaN	NaN	NaN	NaN	NaN	NaN	NaN	NaN	NaN	NaN	NaN	NaN	NaN	NaN	NaN	NaN	NaN	NaN	NaN	0.72763	NaN	NaN	NaN	NaN	NaN	0.87613	0.94314	NaN	NaN	0.64001	NaN	0.61279	NaN	S	3			0.61235	0.000246324	84.113	66.692	84.113	-0.050272	154240000	97412000	56829000	174
NaN	NaN	NaN	NaN	NaN	NaN	NaN	NaN	NaN	NaN	NaN	NaN	NaN	NaN	NaN	NaN	NaN	NaN	NaN	NaN	NaN	NaN	NaN	NaN	NaN	NaN	NaN	NaN	NaN	NaN	NaN	NaN	NaN	NaN	NaN	NaN	S	3			0.46783	0.00136173	52.72	28.691	52.72	-0.32747	0	0	0	2436
NaN	NaN	NaN	NaN	NaN	NaN	NaN	NaN	NaN	NaN	NaN	NaN	NaN	NaN	NaN	NaN	NaN	NaN	NaN	NaN	NaN	NaN	NaN	NaN	NaN	NaN	NaN	NaN	NaN	NaN	NaN	NaN	NaN	NaN	NaN	NaN	S	3			0.46783	0.00136173	52.72	28.691	52.72	-0.32747	0	0	0	2438
1.0084	0.68447	0.61911	0.5433	0.56098	0.61484	0.39726	0.52542	0.40211	0.27869	0.26531	NaN	NaN	NaN	NaN	NaN	NaN	NaN	0.84246	NaN	NaN	NaN	NaN	0.605	0.5014	0.43339	0.32163	0.32249	0.30289	NaN	NaN	NaN	NaN	NaN	NaN	NaN	S	2			0.5	0.00253396	88.338	34.771	55.98	-0.094684	171260000	109490000	61771000	2202
NaN	NaN	NaN	NaN	NaN	2.5696	NaN	2.9792	NaN	NaN	NaN	NaN	NaN	NaN	NaN	NaN	NaN	NaN	1.1384	NaN	NaN	1.5757	NaN	1.6806	NaN	1.4773	NaN	1.3071	1.0996	NaN	NaN	NaN	NaN	NaN	NaN	NaN	S	3			0.65586	4.20491e-05	84.025	63.729	68.406	0.1747	100320000	51965000	48354000	2395
1.0882	0.76497	0.55135	0.63754	0.59119	0.53417	0.49697	0.7752	0.69425	0.49799	0.50072	0.55697	0.40507	0.43214	0.29168	0.26922	0.25252	0.18286	1.0112	0.67259	0.54391	0.62215	0.67734	0.61872	0.62125	0.57185	0.61919	0.61649	0.71219	0.44309	0.58571	0.39998	0.32099	0.28318	0.27353	0.23777	S	3			1	3.41068e-10	331.56	271.46	319.7	0.18463	1166000000	730690000	435310000	2184
1.4365	NaN	NaN	NaN	NaN	NaN	0.66487	0.79545	NaN	NaN	NaN	NaN	NaN	NaN	NaN	NaN	NaN	NaN	NaN	0.8848	0.55786	NaN	0.8307	0.58072	0.5621	NaN	0.54208	0.54115	NaN	NaN	NaN	NaN	NaN	NaN	NaN	NaN	S	3			0.992913	0.000278006	83.602	64.667	65.085	-0.27132	380050000	219420000	160630000	1263
NaN	NaN	NaN	NaN	NaN	NaN	NaN	NaN	NaN	NaN	NaN	NaN	NaN	NaN	NaN	NaN	NaN	NaN	NaN	NaN	NaN	NaN	NaN	NaN	NaN	NaN	NaN	NaN	NaN	NaN	NaN	NaN	NaN	NaN	NaN	NaN	S	3			0.70961	0.00015402	86.189	67.253	55.707	-0.76616	9645600	9645600	0	1592
1.0938	0.83018	0.81127	NaN	0.88044	NaN	0.72622	0.96885	NaN	0.76635	0.8591	1.0032	0.89252	NaN	0.91568	0.98111	0.86057	NaN	NaN	NaN	NaN	NaN	NaN	NaN	NaN	NaN	NaN	NaN	NaN	NaN	NaN	NaN	NaN	NaN	NaN	NaN	S	4			1	0.00571481	45.666	39.454	45.666	0.091811	305430000	160140000	145290000	224
NaN	NaN	NaN	NaN	NaN	NaN	NaN	NaN	NaN	NaN	NaN	NaN	NaN	NaN	NaN	NaN	NaN	NaN	NaN	NaN	NaN	NaN	NaN	NaN	NaN	NaN	NaN	NaN	NaN	NaN	NaN	NaN	NaN	NaN	NaN	NaN	S	4			0.725758	0.000700083	87.157	62.677	87.157	-0.069459	8598900	8598900	0	88
NaN	NaN	NaN	NaN	NaN	NaN	NaN	NaN	NaN	NaN	NaN	NaN	NaN	NaN	NaN	NaN	NaN	NaN	NaN	NaN	NaN	NaN	NaN	NaN	NaN	NaN	NaN	NaN	NaN	1.6988	NaN	NaN	NaN	NaN	NaN	NaN	S	3			0.985498	0.00117321	54.058	29.178	44.029	0.0024373	11781000	3781000	7999900	2151
NaN	NaN	NaN	NaN	NaN	NaN	NaN	NaN	NaN	NaN	NaN	NaN	NaN	NaN	NaN	NaN	NaN	NaN	NaN	NaN	NaN	NaN	NaN	NaN	NaN	NaN	NaN	NaN	NaN	NaN	NaN	NaN	NaN	NaN	NaN	NaN	S	3			0.781023	0.0013801	63.936	40.643	63.936	0.15817	36047000	36047000	0	1383
0.63379	0.42668	NaN	0.65721	0.5755	NaN	NaN	NaN	NaN	NaN	0.66408	1.0878	NaN	1.186	0.51728	NaN	NaN	0.64052	NaN	NaN	NaN	0.43424	NaN	NaN	0.47423	NaN	NaN	NaN	NaN	NaN	NaN	NaN	0.93797	0.98642	NaN	1.2697	S	3			0.999988	0.000125188	70.986	50.735	53.554	0.82066	152950000	83599000	69353000	30
NaN	NaN	NaN	NaN	NaN	NaN	0.71879	NaN	NaN	NaN	NaN	NaN	0.79884	NaN	NaN	NaN	2.0463	NaN	NaN	NaN	NaN	NaN	NaN	NaN	NaN	NaN	NaN	NaN	NaN	NaN	1.6132	NaN	2.0587	2.0088	NaN	NaN	S	3			0.961525	3.94734e-06	93.505	70.51	43.904	0.28532	75627000	35071000	40556000	282
NaN	NaN	NaN	NaN	NaN	NaN	NaN	NaN	NaN	NaN	NaN	NaN	NaN	NaN	NaN	NaN	NaN	NaN	NaN	NaN	NaN	NaN	NaN	NaN	NaN	NaN	NaN	NaN	NaN	NaN	NaN	NaN	NaN	NaN	NaN	NaN	S	3			0.349192	0.000328519	60.814	35.661	47.796	0.33951	0	0	0	286
NaN	0.82017	0.82663	NaN	0.71903	NaN	0.72856	0.90255	0.75418	0.56653	0.6522	0.75892	NaN	0.52143	0.51267	NaN	NaN	NaN	NaN	NaN	NaN	NaN	NaN	0.97832	NaN	NaN	NaN	NaN	NaN	NaN	NaN	NaN	0.50408	NaN	NaN	NaN	S	2			0.969414	0.00125229	85.554	30.201	71.558	-0.15395	78368000	47951000	30417000	232
1.6591	NaN	1.502	NaN	0.76006	NaN	0.85686	NaN	NaN	1.1926	NaN	NaN	NaN	NaN	NaN	NaN	NaN	NaN	NaN	NaN	NaN	NaN	NaN	NaN	NaN	NaN	NaN	NaN	NaN	NaN	NaN	NaN	NaN	NaN	NaN	NaN	S	2			0.858304	0.00312974	85.554	30.201	62.166	-0.11235	29896000	14628000	15268000	234
NaN	NaN	NaN	0.54883	NaN	NaN	0.71239	0.70758	0.87991	NaN	NaN	0.67718	0.61681	NaN	0.57599	NaN	NaN	NaN	NaN	0.81885	1.1747	NaN	NaN	NaN	0.71014	NaN	NaN	0.51701	NaN	1.3707	NaN	0.49922	0.43088	0.26828	NaN	0.26616	S	4			1	0.00021095	59.07	40.381	40.098	-0.23765	337490000	200180000	137320000	335
1.1546	NaN	NaN	NaN	NaN	NaN	0.49789	NaN	NaN	NaN	NaN	0.58802	NaN	NaN	0.54203	NaN	NaN	NaN	NaN	NaN	NaN	NaN	NaN	NaN	NaN	NaN	NaN	NaN	NaN	0.77495	0.6386	0.5474	NaN	0.71588	0.73617	NaN	S	3			1	0.00198327	143.88	92.642	143.88	-0.40099	85267000	56997000	28271000	427
0.90227	0.93374	NaN	0.91639	0.61463	0.61792	NaN	0.70049	NaN	NaN	NaN	0.69041	0.56979	NaN	NaN	0.73007	NaN	0.48932	NaN	NaN	NaN	NaN	0.50378	0.65664	0.71594	0.53727	0.67181	0.67922	0.8296	0.59034	0.61714	0.57915	0.62267	0.50293	0.67473	0.60954	S	2			1	0.000995534	196.88	152.56	74.325	-0.25215	295230000	197280000	97943000	7
1.0422	0.81466	0.91883	0.59253	0.85165	0.8342	0.69837	0.79055	0.90154	0.4606	0.65492	0.66726	0.62559	0.55393	0.47955	0.35301	0.2499	0.14056	1.057	0.93503	0.64651	0.86312	0.64961	0.7434	0.74707	0.75411	0.77428	0.70021	0.80083	0.69837	0.68516	0.54788	0.44295	0.42544	0.50022	0.30836	S	2			0.999995	7.54918e-49	205.26	177.55	192.56	0.09996	11199000000	6552700000	4646300000	158
NaN	NaN	0.70049	NaN	0.90361	NaN	0.58782	NaN	NaN	NaN	NaN	0.57186	NaN	NaN	NaN	NaN	NaN	NaN	NaN	NaN	1.6385	NaN	NaN	0.7483	NaN	NaN	NaN	NaN	0.94685	NaN	NaN	NaN	NaN	NaN	NaN	NaN	S	3			0.764656	1.3282e-20	146.34	123.41	146.34	0.26162	781870000	432440000	349430000	161
NaN	NaN	0.70304	0.59803	0.87062	0.75628	0.74569	0.74825	0.84567	0.6294	NaN	NaN	NaN	0.46125	NaN	NaN	NaN	NaN	NaN	NaN	1.1676	0.92775	0.86929	NaN	NaN	NaN	NaN	NaN	0.63173	NaN	NaN	NaN	NaN	NaN	NaN	NaN	S	2			1	0.00284363	87.719	34.857	87.719	0.2612	77937000	46670000	31267000	219
NaN	NaN	NaN	NaN	NaN	NaN	NaN	NaN	NaN	NaN	NaN	NaN	0.55253	NaN	NaN	0.38046	NaN	NaN	1.2825	0.87775	0.5016	0.68311	0.60959	NaN	NaN	NaN	NaN	NaN	NaN	NaN	NaN	NaN	NaN	NaN	0.32639	NaN	S	2			0.811599	0.00117041	84.169	27.537	66.004	0.1566	42182000	24576000	17606000	174
1.8463	0.63653	0.77122	NaN	0.95996	1.2205	0.99426	1.7191	1.5954	0.96461	1.6448	1.1879	2.1215	2.5833	4.0103	3.1341	3.5888	2.1609	0.82918	0.87203	0.66642	0.96404	1.2917	1.2894	1.1761	1.8129	1.6002	0.61251	1.1257	1.071	1.6603	2.1037	2.4364	2.3767	2.5932	2.643	S	3			1	7.64612e-32	277.41	222.32	277.41	-0.16656	1670200000	618620000	1051600000	137
NaN	NaN	NaN	NaN	NaN	NaN	NaN	NaN	NaN	NaN	NaN	NaN	NaN	NaN	NaN	NaN	NaN	NaN	0.69442	NaN	NaN	NaN	0.64395	NaN	NaN	0.7128	0.46786	NaN	NaN	0.77441	0.99617	0.70082	0.99693	0.92133	0.92588	0.94497	S	2			0.99775	2.56112e-05	112.06	78.047	83.411	-0.42329	46372000	26314000	20059000	938
NaN	NaN	NaN	NaN	NaN	NaN	NaN	NaN	NaN	NaN	NaN	NaN	NaN	NaN	NaN	NaN	NaN	NaN	NaN	NaN	NaN	NaN	NaN	NaN	NaN	NaN	NaN	NaN	NaN	NaN	NaN	NaN	NaN	NaN	NaN	NaN	S	3			0.41753	0.00139075	58.123	28.543	58.123	0.089307	0	0	0	36
NaN	NaN	NaN	NaN	NaN	NaN	NaN	NaN	NaN	NaN	NaN	NaN	NaN	NaN	NaN	NaN	NaN	NaN	NaN	NaN	NaN	NaN	NaN	NaN	NaN	NaN	NaN	NaN	NaN	NaN	NaN	NaN	NaN	NaN	NaN	NaN	S	3			0.41753	0.00139075	58.123	28.543	58.123	0.089307	0	0	0	37
0.91949	0.78949	0.75134	0.54803	0.63781	NaN	0.97936	NaN	0.71228	0.98561	NaN	0.22559	NaN	0.36194	0.71306	0.93393	NaN	NaN	NaN	NaN	1.7018	0.7276	NaN	NaN	NaN	NaN	NaN	NaN	0.70761	0.67989	NaN	NaN	NaN	NaN	0.62606	NaN	S	3			1	0.000315517	218.02	147.2	212.03	-0.17664	86925000	48583000	38341000	151
NaN	NaN	NaN	NaN	NaN	NaN	NaN	NaN	NaN	NaN	NaN	NaN	NaN	NaN	NaN	NaN	NaN	NaN	NaN	NaN	NaN	NaN	NaN	NaN	NaN	NaN	NaN	NaN	NaN	NaN	NaN	NaN	NaN	NaN	NaN	NaN	S	3			0.999543	0.000358105	134.93	91.428	134.93	-0.061581	20792000	20792000	0	24
NaN	NaN	NaN	NaN	NaN	NaN	NaN	NaN	NaN	NaN	NaN	NaN	NaN	NaN	NaN	NaN	NaN	NaN	NaN	NaN	NaN	NaN	NaN	NaN	NaN	NaN	NaN	NaN	NaN	NaN	NaN	NaN	NaN	NaN	NaN	NaN	S	3			0.999543	0.000358105	134.93	91.428	134.93	-0.061581	20792000	20792000	0	28
NaN	NaN	NaN	NaN	NaN	NaN	NaN	0.92583	NaN	NaN	NaN	NaN	0.64006	NaN	NaN	NaN	NaN	NaN	NaN	NaN	NaN	NaN	NaN	NaN	NaN	NaN	NaN	NaN	NaN	NaN	NaN	NaN	NaN	NaN	NaN	NaN	S	3			0.969794	0.0027365	48.672	29.615	48.672	0.10655	26982000	13390000	13592000	406
NaN	0.65961	NaN	NaN	NaN	NaN	NaN	NaN	NaN	NaN	NaN	NaN	NaN	NaN	0.52799	NaN	NaN	NaN	NaN	NaN	NaN	NaN	NaN	NaN	NaN	NaN	NaN	NaN	NaN	NaN	NaN	NaN	NaN	NaN	NaN	NaN	S	3			0.607392	0.000644648	54.306	54.306	54.306	0.046939	21082000	12771000	8311100	412
NaN	NaN	NaN	NaN	NaN	NaN	NaN	NaN	NaN	NaN	NaN	NaN	NaN	NaN	NaN	NaN	NaN	NaN	NaN	NaN	NaN	NaN	NaN	NaN	NaN	NaN	NaN	NaN	NaN	NaN	NaN	NaN	NaN	NaN	NaN	NaN	S	3			0.308612	0.000616471	53.998	32.049	53.998	0.02217	0	0	0	21
NaN	NaN	NaN	NaN	NaN	NaN	NaN	NaN	NaN	NaN	NaN	NaN	NaN	NaN	NaN	NaN	NaN	NaN	NaN	NaN	NaN	NaN	NaN	NaN	NaN	NaN	NaN	NaN	NaN	NaN	NaN	NaN	NaN	NaN	NaN	NaN	S	3			0.308612	0.000616471	53.998	32.049	53.998	0.02217	0	0	0	25
1.011	1.1684	0.95405	1.0774	1.0557	0.94696	1.0011	1.0192	1.4548	1.1185	0.9872	1.0064	1.1076	1.1934	0.9892	1.2119	0.74698	0.82482	1.1593	1.2014	1.8366	1.2103	1.0716	1.0036	1.4654	0.92813	1.0172	0.9687	1.1317	1.6022	0.89109	0.85554	0.89679	0.78981	1.0871	0.92266	S	2			0.996231	5.83537e-06	114.9	100.35	109.4	0.019279	3640000000	2048600000	1591400000	315
1.0131	NaN	NaN	NaN	NaN	NaN	NaN	NaN	NaN	NaN	0.48099	NaN	NaN	1.5147	0.7047	0.43532	NaN	NaN	NaN	NaN	NaN	NaN	NaN	0.58785	0.67209	0.77031	0.66617	0.67829	0.6999	0.69528	NaN	NaN	0.53043	0.47145	NaN	0.73533	S	3			0.672652	0.000110932	74.029	51.461	70.334	0.19308	863640000	525390000	338250000	318
NaN	NaN	NaN	NaN	NaN	NaN	1.1988	NaN	NaN	NaN	NaN	NaN	NaN	NaN	1.1951	1.4478	NaN	NaN	NaN	NaN	NaN	NaN	NaN	0.95165	NaN	NaN	NaN	0.87473	NaN	NaN	NaN	NaN	NaN	NaN	NaN	NaN	S	3			0.885208	0.000137862	71.592	59.52	54.511	-0.19662	119840000	59024000	60814000	321
NaN	NaN	NaN	NaN	NaN	NaN	NaN	NaN	NaN	NaN	NaN	NaN	NaN	NaN	NaN	NaN	1.0784	NaN	NaN	NaN	NaN	NaN	NaN	NaN	NaN	NaN	NaN	NaN	NaN	NaN	NaN	NaN	NaN	NaN	NaN	NaN	S	2			0.939094	1.33209e-05	120.31	68.289	101.66	0.080228	16198000	2986900	13211000	862
NaN	NaN	NaN	NaN	NaN	NaN	NaN	NaN	NaN	NaN	0.66407	NaN	NaN	NaN	NaN	NaN	NaN	NaN	NaN	NaN	NaN	NaN	NaN	NaN	NaN	0.76941	NaN	NaN	0.92076	NaN	NaN	NaN	NaN	NaN	NaN	NaN	S	2			0.657071	1.77786e-33	184.14	144.16	184.14	0.073587	67822000	44949000	22873000	872
1.1085	0.82939	0.75744	0.64723	0.88221	0.78324	0.65291	0.84871	0.77542	0.74175	NaN	0.66459	0.58665	0.46548	0.37718	0.38729	0.26164	0.40177	0.88881	0.80093	NaN	NaN	NaN	0.67085	0.64765	NaN	0.66762	0.68036	NaN	0.70983	0.69317	0.33872	0.29014	0.33028	0.41968	NaN	S	2			0.99961	2.35868e-152	284.21	220.6	264.54	-0.057646	974320000	595200000	379120000	873
0.95809	0.60913	0.76075	0.56307	0.5861	0.73051	0.54253	0.79182	0.71708	0.48559	0.59277	0.50389	0.65903	0.71474	0.7428	0.60659	0.47441	0.42469	0.9895	0.81379	0.56008	0.62168	0.66187	0.45451	0.6829	0.63149	0.69265	0.40672	0.95988	0.64966	0.52423	0.65569	0.62076	0.34203	0.57079	0.52837	S	3			1	0.00013147	148.18	105.23	148.18	-0.86726	659280000	397990000	261290000	170
0.90466	0.73795	NaN	0.60568	0.40518	0.54622	NaN	NaN	0.71146	0.37931	NaN	0.46755	0.48934	NaN	NaN	NaN	NaN	NaN	0.83291	0.68372	0.55326	0.50982	0.48838	NaN	NaN	NaN	NaN	NaN	NaN	NaN	NaN	NaN	NaN	NaN	NaN	NaN	S	2			0.998473	0.000166211	110.08	64.008	102.53	-0.047617	97912000	63536000	34376000	62
0.97584	NaN	0.94686	NaN	0.76571	1.2838	1.1899	0.90223	NaN	NaN	NaN	NaN	0.44865	NaN	0.26784	NaN	NaN	NaN	NaN	NaN	NaN	NaN	NaN	NaN	NaN	NaN	NaN	NaN	NaN	NaN	NaN	NaN	NaN	NaN	NaN	NaN	S	2			0.938424	0.000111565	112.24	81.661	70.167	0.38175	65705000	34198000	31507000	526
1.9743	0.59104	1.1903	0.90628	1.2328	0.83557	0.91114	2.9251	0.82594	NaN	NaN	NaN	1.0526	0.50543	NaN	0.95944	0.77969	1.0308	1.9181	1.6183	1.9368	1.122	0.72278	NaN	NaN	NaN	NaN	NaN	NaN	NaN	NaN	NaN	NaN	NaN	NaN	NaN	S	4			0.902934	0.00035419	156	139.01	156	-0.36959	371080000	164120000	206960000	116
NaN	NaN	NaN	NaN	NaN	NaN	NaN	NaN	NaN	NaN	NaN	NaN	NaN	NaN	NaN	NaN	NaN	NaN	NaN	NaN	NaN	NaN	NaN	NaN	NaN	NaN	NaN	NaN	NaN	NaN	NaN	NaN	NaN	NaN	NaN	NaN	S	4			0.500041	0.0019443	68.044	51.367	68.044	0.35828	10588000	3197200	7390900	118
1.9743	0.59104	1.1903	0.90628	1.2328	0.83557	0.91114	2.9251	0.82594	NaN	NaN	NaN	1.0526	0.50543	NaN	0.95944	0.77969	1.0308	1.9181	1.6183	1.0915	0.45272	0.72278	NaN	NaN	NaN	NaN	NaN	NaN	NaN	NaN	NaN	NaN	NaN	NaN	NaN	S	4			1	0.00035419	156	139.01	156	-0.36959	392790000	177020000	215770000	129
NaN	0.91867	NaN	0.76863	0.89503	0.74768	0.92651	0.75044	0.76042	NaN	0.74665	0.68958	0.48772	NaN	NaN	NaN	NaN	NaN	NaN	0.89324	NaN	NaN	0.81389	NaN	NaN	NaN	NaN	NaN	NaN	NaN	NaN	NaN	NaN	NaN	NaN	NaN	S	3			0.976303	0.00124644	68.676	47.909	68.676	0.21109	164960000	97691000	67268000	102
1.6663	NaN	NaN	0.76863	2.8049	0.74768	NaN	NaN	NaN	NaN	NaN	NaN	0.48772	NaN	NaN	NaN	NaN	NaN	NaN	NaN	0.84183	NaN	NaN	NaN	NaN	2.0008	NaN	NaN	NaN	NaN	NaN	NaN	NaN	NaN	NaN	NaN	S	3			0.768153	4.41545e-22	174.68	140.24	44.743	-0.42305	179580000	75553000	104020000	105
1.807	2.6325	2.7096	2.6459	2.8049	2.7763	2.2272	3.5935	2.7799	1.7964	2.2176	2.8003	2.679	3.0979	2.7172	2.0243	2.2501	1.8569	1.7652	2.623	1.6861	2.098	2.3375	2.1832	2.2945	NaN	2.3158	2.1941	2.8393	2.0028	2.4479	2.459	2.0388	2.2875	2.3079	2.1426	S	2			0.99409	6.53156e-23	182.28	154.67	133.35	0.28608	1827000000	616770000	1210200000	106
NaN	NaN	NaN	1.1156	0.89638	0.75057	0.65056	1.1806	1.186	0.47939	0.99605	2.5027	0.99454	2.9413	1.7743	1.489	4.886	NaN	NaN	1.5163	NaN	NaN	NaN	NaN	NaN	NaN	NaN	NaN	NaN	NaN	2.1248	1.9709	2.4824	3.3996	NaN	3.2471	S	3			0.999989	0.0017502	277.06	208.58	277.06	0.18743	86056000	30421000	55635000	514
NaN	NaN	1.2044	NaN	NaN	1.0266	1.7719	1.2045	NaN	NaN	NaN	NaN	NaN	NaN	2.195	2.7027	2.247	1.8214	NaN	0.88896	1.8085	NaN	1.0643	NaN	NaN	NaN	NaN	NaN	NaN	NaN	NaN	NaN	NaN	2.0364	2.1451	NaN	S	3			0.999991	0.00280279	186.67	144.59	128.48	-0.17165	43174000	15532000	27641000	133
NaN	NaN	NaN	0.7477	1.0232	NaN	NaN	NaN	NaN	NaN	NaN	NaN	NaN	NaN	NaN	NaN	NaN	NaN	NaN	NaN	NaN	NaN	NaN	NaN	NaN	NaN	NaN	NaN	NaN	NaN	NaN	NaN	NaN	NaN	NaN	NaN	S	4			0.555086	0.00226202	53.924	37.074	53.924	0.080587	31510000	18643000	12867000	64
NaN	NaN	NaN	1.4504	NaN	NaN	NaN	NaN	NaN	NaN	NaN	NaN	NaN	NaN	NaN	NaN	NaN	NaN	1.1617	0.43974	0.54342	NaN	NaN	NaN	NaN	NaN	NaN	NaN	NaN	NaN	NaN	NaN	NaN	NaN	NaN	NaN	S	3			0.999964	0.000879283	152.94	63.587	110.44	-0.080025	31867000	15570000	16297000	322
0.97747	0.33441	NaN	NaN	NaN	NaN	NaN	NaN	NaN	NaN	NaN	NaN	NaN	NaN	NaN	NaN	NaN	NaN	NaN	NaN	NaN	NaN	NaN	NaN	NaN	NaN	NaN	NaN	NaN	NaN	NaN	NaN	NaN	NaN	NaN	NaN	S	2			0.87847	0.0029483	93.712	52.022	93.712	-0.25413	19217000	13296000	5920500	332
NaN	NaN	NaN	NaN	NaN	NaN	NaN	NaN	NaN	NaN	NaN	NaN	NaN	NaN	NaN	NaN	NaN	NaN	NaN	NaN	NaN	NaN	NaN	NaN	NaN	NaN	NaN	NaN	NaN	NaN	NaN	NaN	NaN	NaN	NaN	NaN	S	4			0.430155	0.000263502	53.123	43.474	53.123	-0.061095	0	0	0	286
NaN	NaN	NaN	NaN	NaN	NaN	NaN	NaN	NaN	NaN	NaN	NaN	NaN	NaN	NaN	NaN	NaN	NaN	NaN	NaN	NaN	NaN	NaN	NaN	NaN	NaN	NaN	NaN	NaN	NaN	NaN	NaN	NaN	NaN	NaN	NaN	S	4			0.609501	0.000263502	53.123	43.474	40.43	-0.60053	5308000	5308000	0	287
NaN	NaN	0.22201	NaN	NaN	NaN	NaN	NaN	NaN	NaN	NaN	NaN	NaN	NaN	NaN	NaN	NaN	NaN	NaN	NaN	NaN	NaN	NaN	NaN	NaN	NaN	NaN	NaN	NaN	NaN	NaN	NaN	NaN	NaN	NaN	NaN	S	2			0.774543	0.00178895	185.96	132.51	64.845	0.16597	100200000	98039000	2162800	229
0.89327	0.68823	0.73818	0.7547	0.88877	0.67083	0.8971	1.2666	0.90058	0.78037	0.64417	0.77835	0.80008	0.83571	0.85411	0.82071	0.80455	1.0178	1.0677	0.84687	0.67735	0.7912	0.74353	0.63889	0.69424	0.76903	0.75905	0.69762	0.74918	0.71248	0.85067	0.93508	0.69622	0.76386	0.74633	0.7231	S	3			1	1.98264e-197	332.02	290.65	276.17	-0.15724	10781000000	5875600000	4905500000	488
NaN	NaN	NaN	NaN	NaN	NaN	NaN	NaN	NaN	NaN	NaN	NaN	NaN	NaN	NaN	NaN	NaN	NaN	NaN	NaN	NaN	NaN	NaN	NaN	NaN	NaN	NaN	NaN	NaN	NaN	NaN	NaN	NaN	NaN	NaN	NaN	S	3			0.639574	0.00127305	72.568	41.158	72.568	0.28216	14324000	14324000	0	336
NaN	NaN	NaN	NaN	NaN	NaN	NaN	NaN	NaN	NaN	NaN	NaN	NaN	NaN	NaN	NaN	NaN	NaN	NaN	NaN	NaN	NaN	NaN	NaN	NaN	NaN	NaN	NaN	NaN	NaN	NaN	NaN	NaN	NaN	NaN	NaN	S	3			0.737358	0.000160052	76.533	58.378	46.35	-0.13634	24987000	24987000	0	344
NaN	0.54556	NaN	NaN	NaN	NaN	0.28782	0.35992	NaN	NaN	NaN	NaN	NaN	NaN	NaN	NaN	NaN	NaN	NaN	NaN	0.59908	0.51449	0.41252	NaN	NaN	NaN	0.18601	NaN	NaN	NaN	NaN	NaN	NaN	NaN	NaN	NaN	S	3			0.723489	1.05228e-06	113.92	113.92	113.92	-0.35502	288440000	204360000	84082000	349
1.0851	NaN	NaN	NaN	NaN	0.2333	NaN	NaN	NaN	NaN	NaN	NaN	NaN	NaN	NaN	NaN	NaN	NaN	1.0817	0.39094	NaN	NaN	NaN	NaN	NaN	NaN	NaN	NaN	NaN	NaN	NaN	NaN	NaN	NaN	NaN	NaN	S	3			1	2.35413e-05	325.61	227.19	216.71	-0.17652	387130000	304900000	82228000	129
NaN	0.24566	NaN	NaN	NaN	NaN	NaN	NaN	NaN	NaN	NaN	NaN	NaN	NaN	NaN	NaN	NaN	NaN	NaN	NaN	NaN	NaN	NaN	NaN	NaN	NaN	NaN	NaN	NaN	NaN	NaN	NaN	NaN	NaN	NaN	NaN	S	2			0.995546	0.0010068	85.51	53.596	68.088	0.0043578	8573000	8081500	491460	194
NaN	NaN	NaN	NaN	NaN	NaN	NaN	NaN	NaN	NaN	NaN	NaN	NaN	NaN	NaN	0.42629	NaN	NaN	NaN	NaN	NaN	NaN	NaN	NaN	NaN	NaN	NaN	NaN	NaN	NaN	1.0058	NaN	NaN	NaN	NaN	NaN	S	2			0.998823	6.25232e-08	138.55	109.49	129.17	0.32867	75961000	7765100	68195000	482
1.1364	1.0711	0.93649	0.86585	NaN	0.91609	NaN	1.1857	0.86817	0.87286	0.97765	1.225	1.1384	1.3249	1.2448	1.2984	1.3589	1.3832	1.0668	0.78993	0.77544	0.75883	1.0721	0.95345	NaN	NaN	NaN	NaN	NaN	0.73048	1.1216	0.9563	0.91447	1.3302	1.1449	1.2123	S	2			0.994541	6.28156e-17	166.77	147.95	148.64	-0.31267	641510000	316490000	325020000	123
NaN	NaN	NaN	NaN	NaN	NaN	NaN	NaN	NaN	NaN	0.93669	NaN	NaN	NaN	NaN	NaN	NaN	NaN	NaN	NaN	NaN	NaN	NaN	NaN	NaN	NaN	NaN	NaN	NaN	NaN	NaN	NaN	NaN	NaN	NaN	NaN	S	2			0.552937	8.41054e-06	126.16	98.485	90.348	-0.40308	17688000	10377000	7311000	127
0.68226	1.0323	0.50684	0.73837	0.60556	0.69502	NaN	NaN	0.84558	1.0208	0.51652	NaN	0.70673	0.19864	0.38749	0.66071	0.455	NaN	1.0292	0.45923	0.74616	NaN	0.41982	1.6051	NaN	0.78818	0.57925	0.5976	1.1849	0.69986	0.40357	0.43785	0.35626	0.3984	0.83032	0.84912	S	3			0.999981	0.000361023	224.15	177.83	224.15	0.066666	162400000	100010000	62391000	18
1.0468	0.99073	0.80919	0.6617	0.79377	0.88158	0.91389	1.0462	0.86605	0.6498	0.93292	0.81563	0.89545	1.0125	0.90735	0.72336	NaN	0.75955	1.0864	1.043	NaN	NaN	0.69215	0.99122	1.1988	NaN	NaN	NaN	NaN	1.2323	NaN	NaN	NaN	0.97037	NaN	NaN	S	3			0.999165	0.000294246	141.71	98.208	141.71	-0.37511	150330000	75234000	75100000	3148
NaN	NaN	NaN	NaN	NaN	NaN	NaN	NaN	NaN	0.6498	NaN	NaN	NaN	NaN	NaN	0.72336	0.74016	NaN	NaN	NaN	NaN	0.8096	0.69215	0.99122	NaN	NaN	NaN	NaN	NaN	NaN	NaN	NaN	NaN	NaN	NaN	NaN	S	3			0.875021	0.000425618	107.03	68.866	107.03	-0.31212	49761000	24712000	25049000	3151
NaN	NaN	NaN	NaN	NaN	0.92458	NaN	0.92741	0.75824	0.55079	0.71754	0.78196	0.89522	0.9794	NaN	0.6655	0.65466	NaN	1.1027	0.71481	NaN	0.78967	NaN	NaN	NaN	NaN	NaN	NaN	NaN	NaN	NaN	NaN	NaN	NaN	NaN	0.51395	S	2			0.996831	2.95032e-13	145.83	92.942	145.81	-0.1237	118480000	76634000	41844000	3894
NaN	NaN	NaN	NaN	NaN	NaN	NaN	NaN	NaN	NaN	NaN	1.0782	NaN	0.96695	NaN	NaN	NaN	NaN	NaN	NaN	NaN	NaN	NaN	NaN	NaN	NaN	NaN	NaN	NaN	0.91709	0.66456	0.82143	0.66934	NaN	NaN	0.77992	S	2			0.999989	0.00237923	191.89	168.21	85.163	1.5493	51705000	22483000	29222000	2831
0.64597	0.64979	0.66666	0.72441	0.81681	0.82671	0.83488	1.0098	NaN	NaN	NaN	1.0782	0.7645	0.96695	0.88701	1.0962	1.0366	0.89691	NaN	NaN	NaN	NaN	NaN	NaN	NaN	NaN	NaN	NaN	NaN	0.91709	0.66456	0.82143	0.66934	0.89836	0.83085	0.77992	S	2			0.999906	0.00237923	191.89	168.21	85.163	1.5493	144890000	71174000	73716000	2833
0.91609	0.57644	0.74622	0.62784	0.59502	0.70257	0.69968	0.89216	0.80002	0.4953	0.57884	0.50909	0.40424	0.39088	NaN	0.3332	0.35955	NaN	1.0477	0.76744	0.63561	0.66944	0.70872	0.7124	0.68427	NaN	0.76137	0.57683	NaN	NaN	0.39972	0.41519	0.29035	0.19965	NaN	0.31302	S	3			0.999997	0.000328027	257.02	186.13	233.09	0.11271	461230000	292080000	169150000	2751
NaN	NaN	NaN	NaN	NaN	NaN	NaN	0.87558	NaN	NaN	NaN	NaN	NaN	0.30618	NaN	NaN	NaN	NaN	NaN	NaN	NaN	0.60023	NaN	NaN	NaN	NaN	NaN	NaN	NaN	NaN	NaN	NaN	NaN	NaN	NaN	NaN	S	3			0.901032	0.000464225	132.14	77.079	132.14	-0.015587	21846000	13300000	8545400	2794
NaN	NaN	NaN	NaN	0.76082	0.74441	0.65258	NaN	NaN	0.59547	0.63997	0.55019	NaN	NaN	0.3083	0.21768	NaN	NaN	1.1926	0.75056	0.56987	0.63046	0.57379	NaN	NaN	NaN	NaN	NaN	NaN	NaN	NaN	NaN	NaN	NaN	0.1595	0.12322	S	3			0.931247	2.25162e-06	213.63	176.49	213.63	-0.088849	134490000	83913000	50579000	2795
NaN	NaN	NaN	NaN	NaN	NaN	NaN	NaN	NaN	0.59547	NaN	NaN	0.3873	NaN	NaN	NaN	NaN	NaN	NaN	NaN	NaN	NaN	NaN	NaN	NaN	NaN	NaN	NaN	NaN	NaN	NaN	NaN	NaN	NaN	NaN	NaN	S	2			0.817392	0.000446676	98.562	70.207	60.325	0.61269	24827000	16916000	7911200	2797
NaN	NaN	NaN	NaN	NaN	NaN	NaN	0.87558	NaN	NaN	0.63997	0.55019	0.3873	0.30618	0.3083	NaN	NaN	NaN	NaN	0.75056	0.60713	NaN	NaN	NaN	NaN	NaN	NaN	NaN	NaN	NaN	NaN	NaN	NaN	NaN	0.1595	0.12322	S	2			0.973572	0.000261988	105.82	65.62	105.82	0.42631	67135000	47531000	19605000	2800
NaN	NaN	NaN	NaN	0.76082	0.74441	0.65258	NaN	NaN	NaN	NaN	NaN	NaN	NaN	NaN	0.21768	NaN	NaN	1.2696	0.74315	0.56987	0.60023	0.52415	NaN	NaN	NaN	NaN	NaN	NaN	NaN	NaN	NaN	NaN	NaN	NaN	NaN	S	3			0.994928	2.25162e-06	213.63	176.49	213.63	-0.088849	106090000	62911000	43182000	2801
0.98015	0.81708	0.80614	0.95031	0.86256	0.88786	0.7031	1.1264	1.1392	0.5923	0.93001	0.89945	0.91557	1.062	0.85895	0.95029	0.9204	0.76179	1.2337	0.98084	0.83118	0.59897	0.63355	0.84832	0.66073	0.72164	0.76987	0.66979	0.82091	0.85849	0.76364	0.79403	0.6917	0.73832	0.74804	0.90311	S	3			1	0.000100561	149.33	101.71	149.33	-0.31296	265100000	143900000	121200000	173
0.84954	0.75715	0.74661	0.56681	0.62294	0.64993	0.57812	0.7032	0.60875	0.52085	0.43366	0.31632	0.31765	0.23388	0.21815	NaN	NaN	0.13569	0.96075	0.75657	0.70953	0.5596	0.52183	0.53786	0.54793	0.52563	0.43045	0.44683	0.62742	0.39045	0.4204	0.3042	0.2476	0.13667	NaN	NaN	S	3			1	2.06741e-06	308	259.38	225.33	0.23183	797050000	532120000	264940000	26
NaN	NaN	NaN	NaN	NaN	NaN	NaN	NaN	NaN	NaN	NaN	NaN	NaN	NaN	NaN	NaN	NaN	NaN	NaN	NaN	NaN	0.56249	NaN	NaN	NaN	NaN	NaN	NaN	NaN	NaN	NaN	NaN	NaN	NaN	NaN	NaN	S	3			0.956968	0.00133589	53.998	34.6	53.998	0.59164	9511000	5845000	3666000	314
1.0358	0.89251	0.84875	0.67434	0.72037	0.82095	0.72998	0.86762	0.84497	0.74556	0.58871	0.48662	0.56039	0.49677	NaN	NaN	NaN	NaN	1.0919	0.75535	0.77506	NaN	NaN	0.7127	0.70808	0.68134	0.66465	0.65836	0.74491	0.59964	0.64586	NaN	0.48451	NaN	0.33265	NaN	S	3			0.999819	1.23485e-11	119.42	87.675	62.295	0.28297	1600300000	970460000	629860000	321
1.038	0.70487	NaN	NaN	0.63641	0.58574	NaN	0.55619	0.86841	NaN	NaN	0.48662	NaN	NaN	NaN	NaN	NaN	NaN	0.96087	0.68833	0.80339	0.56249	NaN	0.47659	0.45514	NaN	0.54612	NaN	NaN	NaN	0.32668	NaN	NaN	NaN	NaN	NaN	S	3			0.999965	0.000371321	67.895	41.058	62.295	0.28297	245800000	140440000	105360000	323
1.0372	NaN	NaN	NaN	NaN	NaN	NaN	NaN	NaN	NaN	NaN	NaN	NaN	NaN	NaN	NaN	NaN	NaN	NaN	NaN	NaN	NaN	NaN	0.72771	0.9808	1.024	0.84536	NaN	NaN	0.87428	0.70051	NaN	NaN	0.51364	0.50844	0.53958	S	3			0.92306	0.000473864	208.38	170.22	163.46	-0.1433	98260000	52658000	45602000	681
1.0372	NaN	NaN	NaN	NaN	NaN	NaN	NaN	NaN	NaN	NaN	NaN	NaN	NaN	NaN	NaN	NaN	NaN	NaN	NaN	NaN	NaN	NaN	0.72771	0.9808	1.024	0.84536	NaN	NaN	NaN	0.70051	NaN	NaN	0.51364	0.50844	0.53958	S	3			0.5	0.000473864	208.38	170.22	208.38	-0.37221	76914000	40265000	36649000	682
1.0315	0.72089	0.62072	0.55531	0.59866	0.62874	0.54276	0.74711	0.69506	0.50712	0.47236	0.52006	0.56052	0.4865	0.42326	0.33609	0.29679	0.24341	0.90959	0.62935	0.60171	0.59433	0.57097	0.56221	0.5891	0.5246	0.58269	0.48301	0.64342	0.49068	0.54486	0.42459	0.45764	0.30324	0.3455	0.34544	S	2			1	4.05613e-05	127.17	29.44	87.216	0.05988	820750000	486710000	334050000	138
1.2075	0.91339	0.80422	0.76988	0.91836	0.94033	0.84993	1.3155	1.0177	0.64881	0.72257	NaN	0.97916	0.94737	0.82311	NaN	0.72863	0.9278	1.049	0.87799	0.73543	NaN	0.84046	0.8653	0.9259	0.77694	0.79928	0.92633	1.0441	0.83208	0.81623	NaN	0.8275	0.8826	0.95019	0.9469	S	3			0.999409	4.48993e-12	117.04	97.478	99.93	-0.082733	710630000	363200000	347430000	788
1.0259	NaN	NaN	NaN	NaN	0.68511	0.55492	0.80978	0.7025	0.57186	0.56161	0.53791	0.4469	NaN	NaN	NaN	0.14399	NaN	NaN	0.64886	0.58713	0.62064	NaN	0.62571	0.61625	0.57491	0.55179	0.59289	NaN	0.48571	0.54536	0.4042	0.33484	NaN	0.20183	NaN	S	2			0.990889	1.1438e-08	141.73	99.117	113.99	0.27209	6551600000	4068700000	2482900000	992
1.0113	0.69076	0.66463	0.65621	0.69695	NaN	0.55492	NaN	NaN	0.57186	NaN	0.53791	NaN	0.36863	0.24426	0.16819	NaN	0.12805	1.0106	NaN	NaN	0.62064	0.62191	NaN	NaN	NaN	0.55179	NaN	0.70888	NaN	0.54536	NaN	NaN	0.23736	NaN	0.18253	S	2			0.913172	2.53987e-08	138.89	99.879	138.89	-0.0090418	5125200000	3321700000	1803500000	994
1.0489	0.77111	0.74429	1.1312	1.144	0.82149	0.95638	1.2714	0.9214	0.68866	1.0584	0.91614	NaN	1.3059	0.82494	0.65817	1.0583	NaN	1.0305	0.96332	0.93601	1.24	1.6041	1.9988	NaN	NaN	1.173	NaN	NaN	NaN	NaN	NaN	NaN	NaN	NaN	NaN	S	3			1	8.48382e-06	133.98	119.32	42.639	-0.057685	239660000	121600000	118060000	868
NaN	NaN	NaN	NaN	NaN	NaN	NaN	NaN	NaN	NaN	NaN	NaN	NaN	NaN	NaN	NaN	NaN	NaN	NaN	NaN	NaN	NaN	NaN	NaN	NaN	NaN	NaN	NaN	NaN	NaN	NaN	NaN	NaN	NaN	NaN	NaN	S	3			0.274179	0.00237873	53.905	33.873	53.905	-0.11611	0	0	0	311
NaN	NaN	NaN	NaN	NaN	NaN	NaN	NaN	NaN	NaN	NaN	NaN	NaN	NaN	NaN	NaN	NaN	NaN	NaN	NaN	NaN	NaN	NaN	NaN	NaN	NaN	NaN	NaN	NaN	NaN	NaN	NaN	NaN	NaN	NaN	NaN	S	3			0.386381	1.17729e-05	76.351	54.881	76.351	0.87408	0	0	0	312
NaN	NaN	NaN	NaN	NaN	NaN	NaN	NaN	NaN	NaN	NaN	NaN	NaN	NaN	NaN	NaN	NaN	NaN	NaN	NaN	NaN	NaN	NaN	NaN	NaN	NaN	NaN	NaN	NaN	NaN	NaN	NaN	NaN	NaN	NaN	NaN	S	3			0.390777	1.17729e-05	76.351	54.881	51.473	1.0662	0	0	0	313
NaN	0.81551	0.73516	0.71853	0.73523	NaN	NaN	NaN	NaN	NaN	NaN	NaN	NaN	NaN	NaN	NaN	NaN	NaN	NaN	NaN	NaN	NaN	NaN	NaN	NaN	NaN	NaN	NaN	NaN	NaN	NaN	NaN	NaN	NaN	NaN	NaN	S	3			0.999996	0.00141936	60.764	25.537	60.764	-0.091519	23838000	14900000	8938600	374
1.0324	NaN	1.051	0.80631	NaN	0.90684	NaN	NaN	NaN	0.85285	0.89983	NaN	NaN	NaN	NaN	NaN	NaN	1.8319	NaN	NaN	NaN	NaN	NaN	NaN	NaN	NaN	NaN	NaN	NaN	NaN	NaN	NaN	NaN	NaN	NaN	NaN	S	3			1	0.000424338	226.79	175.96	226.79	0.21362	80869000	40216000	40654000	383
NaN	0.69376	NaN	0.91596	1.0501	0.7818	1.0689	0.61594	1.0947	1.0165	0.59945	NaN	NaN	NaN	NaN	NaN	NaN	NaN	NaN	NaN	NaN	NaN	NaN	NaN	NaN	NaN	NaN	NaN	NaN	NaN	NaN	NaN	NaN	NaN	NaN	NaN	S	3			0.999416	0.00039108	126.03	91.276	87.713	-0.53488	68641000	39564000	29077000	387
NaN	NaN	NaN	NaN	6.5454	NaN	1.0987	NaN	NaN	0.47397	0.27599	NaN	NaN	NaN	NaN	NaN	NaN	NaN	NaN	NaN	NaN	NaN	NaN	NaN	NaN	NaN	NaN	NaN	NaN	NaN	NaN	NaN	NaN	NaN	NaN	NaN	S	3			1	0.00250348	138.2	99.929	114.97	0.28936	41487000	35446000	6040600	958
0.96833	0.72578	0.78246	0.71028	0.75041	0.6994	0.63107	0.94928	0.78056	0.57525	0.61773	0.5779	0.5075	0.4252	0.3134	0.23195	0.17829	NaN	1.126	0.74681	0.65416	NaN	0.70728	0.67614	0.73609	0.65898	0.66916	0.67441	0.89947	0.53485	0.59052	0.43388	0.3158	0.27264	0.22385	0.20565	S	2			1	2.36578e-10	230.48	154.41	88.394	-0.39902	4104400000	2513800000	1590600000	116
0.96833	0.72578	0.78246	0.71028	0.75041	0.6994	0.63107	0.94928	0.78056	0.57525	0.61773	0.5779	0.5075	0.4252	0.3134	0.23195	0.17829	NaN	1.126	0.74681	0.65416	NaN	0.70728	0.67614	0.73609	0.65898	0.66916	0.67441	0.89947	0.53485	0.59052	0.43388	0.3158	0.27264	0.22385	0.20565	S	2			1	2.36578e-10	230.48	154.41	88.394	-0.39902	4104400000	2513800000	1590600000	124
1.0465	0.7738	0.69792	0.63788	NaN	0.59527	NaN	NaN	0.52798	0.40031	0.30752	0.15941	NaN	NaN	NaN	NaN	NaN	NaN	NaN	NaN	NaN	0.50294	NaN	NaN	NaN	NaN	NaN	NaN	NaN	NaN	NaN	NaN	NaN	NaN	NaN	NaN	S	2			0.890183	7.45661e-08	141.91	107.44	85.884	0.84787	130520000	84533000	45989000	138
1.0704	NaN	NaN	0.63738	0.68538	0.90037	0.62249	0.96997	0.72937	0.64583	0.61678	0.49831	0.3547	0.26848	NaN	NaN	NaN	NaN	1.0278	NaN	0.68348	0.66893	0.72727	NaN	NaN	NaN	NaN	NaN	NaN	NaN	NaN	NaN	NaN	NaN	NaN	NaN	S	2			1	0.000140665	111.63	87.376	111.63	0.25723	122030000	71840000	50188000	162
NaN	NaN	NaN	NaN	NaN	NaN	NaN	NaN	NaN	NaN	NaN	NaN	NaN	NaN	NaN	NaN	NaN	NaN	NaN	NaN	NaN	NaN	NaN	NaN	NaN	NaN	NaN	NaN	NaN	NaN	NaN	NaN	NaN	NaN	NaN	NaN	S	3			0.788215	0.00063818	212.34	167.06	152.67	0.48495	7486800	7486800	0	61
NaN	NaN	NaN	NaN	NaN	NaN	NaN	NaN	NaN	NaN	NaN	NaN	NaN	NaN	NaN	NaN	NaN	NaN	NaN	NaN	NaN	NaN	NaN	NaN	NaN	NaN	NaN	NaN	NaN	NaN	NaN	NaN	NaN	NaN	NaN	NaN	S	3			0.472439	0.00063818	212.34	167.06	212.34	0.43602	0	0	0	62
NaN	NaN	NaN	NaN	NaN	NaN	NaN	NaN	NaN	NaN	NaN	NaN	NaN	NaN	NaN	NaN	NaN	NaN	NaN	NaN	NaN	NaN	NaN	NaN	NaN	NaN	NaN	NaN	NaN	NaN	NaN	NaN	NaN	NaN	NaN	NaN	S	3			0.830594	0.00063818	228.08	168.29	228.08	0.34816	7121700	7121700	0	64
1.1811	0.73605	0.60233	NaN	0.53138	0.64905	0.39745	0.58318	0.38548	0.26484	0.23351	NaN	NaN	NaN	NaN	NaN	NaN	NaN	1.0544	0.69566	0.60813	0.56133	0.56579	NaN	NaN	NaN	NaN	NaN	NaN	NaN	NaN	NaN	NaN	NaN	NaN	NaN	S	3			0.999995	6.66215e-05	238.03	195.71	227.47	-0.066228	243730000	176210000	67522000	269
1.0622	0.6883	0.75155	0.69249	0.85608	0.74533	0.7426	1.0893	0.77608	0.65458	0.52804	0.63549	0.77752	0.70101	0.6789	0.6116	0.46434	0.52376	1.1632	0.8089	NaN	0.56001	0.53483	0.59065	0.631	0.58019	0.58841	0.65171	0.78844	0.53881	0.66445	0.56278	0.47931	0.56493	0.5784	0.54365	S	3			0.999978	9.92037e-08	232.79	166.77	218.34	0.15657	566210000	327260000	238950000	182
NaN	NaN	NaN	NaN	NaN	NaN	NaN	NaN	NaN	NaN	NaN	NaN	NaN	NaN	NaN	NaN	NaN	NaN	NaN	NaN	NaN	NaN	NaN	0.57114	0.57943	NaN	0.38078	NaN	0.36581	NaN	NaN	NaN	NaN	NaN	NaN	NaN	S	3			0.964548	0.000286171	69.979	37.233	53.504	0.0059207	66535000	47307000	19229000	353
NaN	NaN	NaN	NaN	0.66313	NaN	NaN	0.66135	NaN	NaN	NaN	NaN	NaN	NaN	NaN	NaN	NaN	NaN	NaN	NaN	NaN	NaN	NaN	NaN	NaN	NaN	NaN	NaN	NaN	NaN	NaN	NaN	NaN	NaN	NaN	NaN	S	3			0.93646	0.00366882	66.893	48.269	66.893	-0.15305	90152000	75879000	14273000	358
1.0014	0.73503	NaN	0.64278	0.66313	NaN	0.49106	0.66135	0.49805	0.32625	0.26463	NaN	NaN	NaN	NaN	NaN	NaN	NaN	1.1093	0.77433	NaN	0.63685	0.62263	0.57114	0.57943	0.45724	0.38078	NaN	0.36581	NaN	NaN	NaN	NaN	NaN	NaN	NaN	S	3			0.999982	0.000286171	69.979	37.233	66.893	-0.15305	387750000	257370000	130380000	363
NaN	NaN	NaN	NaN	NaN	NaN	NaN	NaN	NaN	NaN	NaN	NaN	NaN	NaN	NaN	NaN	NaN	NaN	NaN	NaN	NaN	NaN	NaN	NaN	2.4398	NaN	1.5131	2.6795	2.2666	NaN	NaN	0.78625	NaN	NaN	NaN	NaN	S	2			0.999998	6.52656e-08	139.74	114.84	139.74	0.27896	24241000	5906400	18335000	83
0.74024	0.81245	0.71516	1.2116	0.83395	0.71054	0.70408	0.63663	NaN	0.70415	0.73234	NaN	NaN	NaN	NaN	NaN	NaN	NaN	NaN	NaN	NaN	NaN	NaN	NaN	NaN	NaN	NaN	NaN	NaN	NaN	NaN	NaN	NaN	NaN	NaN	NaN	S	3			0.999999	0.000303683	172.98	134.68	151.22	0.15015	48631000	27520000	21111000	290
1.0894	0.58352	0.5502	0.56241	0.57117	NaN	NaN	0.48287	NaN	NaN	NaN	NaN	NaN	NaN	NaN	NaN	NaN	NaN	0.89133	0.48947	0.61676	0.61644	0.50408	NaN	NaN	NaN	NaN	NaN	NaN	NaN	NaN	NaN	NaN	NaN	NaN	NaN	S	3			0.999983	0.000424261	85.176	47.824	68.626	0.064638	165930000	117820000	48112000	375
1.0907	NaN	NaN	NaN	0.66753	0.76282	NaN	NaN	NaN	0.7049	0.66702	0.76256	0.7637	NaN	NaN	NaN	0.68418	0.71896	NaN	NaN	NaN	0.63017	0.62979	0.63718	NaN	NaN	0.62556	0.694	0.74607	0.58217	NaN	0.62015	0.71194	0.6816	NaN	0.67067	S	2			0.933805	2.22058e-15	136.71	136.71	97.839	-0.14783	1731100000	1023500000	707590000	42
NaN	NaN	NaN	NaN	NaN	NaN	NaN	NaN	NaN	NaN	NaN	NaN	NaN	NaN	NaN	NaN	NaN	NaN	NaN	NaN	NaN	NaN	NaN	NaN	NaN	NaN	NaN	NaN	NaN	NaN	NaN	NaN	NaN	NaN	NaN	NaN	S	2			0.962808	0.00222375	59.359	40.235	46.46	0.34122	16044000	16044000	0	11
NaN	NaN	NaN	NaN	NaN	NaN	NaN	NaN	NaN	NaN	NaN	NaN	NaN	NaN	NaN	NaN	NaN	NaN	NaN	NaN	NaN	NaN	NaN	NaN	NaN	NaN	NaN	NaN	NaN	NaN	NaN	NaN	NaN	NaN	NaN	NaN	S	2			0.997149	3.02584e-05	94.588	67.989	94.588	-0.82971	76865000	69788000	7077200	13
NaN	NaN	NaN	NaN	NaN	NaN	NaN	NaN	NaN	NaN	NaN	NaN	NaN	NaN	NaN	NaN	NaN	NaN	NaN	0.59295	NaN	0.90256	0.43086	NaN	NaN	NaN	NaN	NaN	NaN	NaN	NaN	NaN	NaN	NaN	NaN	NaN	S	3			1	0.00269492	198.52	122.19	122.66	0.14297	31145000	26692000	4453000	72
NaN	0.51422	NaN	0.481	NaN	0.47764	0.53323	0.67082	0.44239	0.37758	0.3426	0.37385	0.32665	0.26805	0.25786	0.33772	0.17344	0.19688	0.89606	0.68384	0.5628	0.47238	0.42187	0.4907	0.64201	0.49095	0.54695	0.50007	0.70793	0.30226	NaN	NaN	0.54032	NaN	NaN	NaN	S	2			1	0.000658845	88.19	49.79	60.307	-0.44147	225990000	154420000	71572000	127
0.79327	NaN	NaN	0.54262	0.6495	0.54244	0.40787	0.78309	0.60601	0.28059	0.52785	0.72182	0.51519	0.65711	0.44818	0.20118	0.2854	0.23562	1.0262	0.66603	0.30112	0.48329	0.69812	0.47111	0.4592	0.37112	NaN	0.53055	0.58025	NaN	0.62934	0.50995	0.43096	0.58772	0.41954	0.47272	S	3			1	4.95828e-07	103.73	84.479	103.73	-0.12601	649600000	415480000	234120000	298
1.1249	0.59473	0.55009	0.52864	0.78044	0.7726	0.66139	0.63322	0.87748	0.61642	0.57117	0.47367	0.6828	0.54257	0.59147	0.91515	0.25221	0.49785	1.0509	0.66623	0.89983	NaN	NaN	NaN	NaN	NaN	NaN	NaN	NaN	NaN	NaN	NaN	NaN	NaN	NaN	NaN	S	3			1	0.00222333	128.03	89.039	128.03	0.05797	1405600000	828610000	577040000	340
0.9497	0.7945	NaN	NaN	NaN	NaN	NaN	NaN	NaN	NaN	0.71877	NaN	0.67216	NaN	NaN	0.55488	0.56753	NaN	1.1416	NaN	NaN	NaN	NaN	NaN	NaN	NaN	0.70638	0.69353	NaN	NaN	NaN	NaN	NaN	NaN	NaN	0.52516	S	2			0.939169	4.14275e-17	168.99	92.683	114.53	-0.0073218	155360000	88380000	66981000	8
0.96958	0.71944	0.72728	0.69512	0.74576	0.74155	0.65032	0.95218	0.83246	0.58902	0.71514	0.73299	0.7244	0.74788	0.62715	0.60258	0.54797	0.50756	1.0645	0.83721	0.60212	0.75041	0.74612	0.75363	0.76053	0.70231	0.72887	0.72211	0.90341	0.72854	0.74707	0.6848	0.61896	0.60832	0.52497	0.59262	S	3			0.999989	1.72249e-23	326.81	275.67	326.81	-0.052037	2404200000	1354300000	1049900000	9
NaN	NaN	NaN	NaN	NaN	NaN	NaN	NaN	NaN	NaN	NaN	NaN	0.7244	NaN	NaN	NaN	NaN	NaN	NaN	NaN	NaN	NaN	NaN	NaN	NaN	NaN	NaN	NaN	NaN	NaN	NaN	NaN	NaN	NaN	NaN	NaN	S	3			0.499954	0.000249463	218.94	179.03	218.94	0.1046	50336000	29282000	21054000	11
1.0721	0.7924	0.80873	0.67765	0.6488	0.74746	0.46603	0.79938	0.69266	0.47128	0.41337	0.29285	NaN	0.13479	NaN	0.11497	0.090368	0.093696	1.1193	0.74456	0.60195	0.58512	0.71554	0.56746	0.58544	0.52498	0.48809	0.37351	0.49991	0.24142	0.18596	0.21465	0.15322	0.13327	NaN	0.1222	S	3			1	3.32323e-05	241.4	190.93	217.02	0.097664	1010900000	650070000	360850000	503
1.0411	NaN	0.56027	0.45549	0.63876	0.4674	0.3574	NaN	0.42644	0.37018	NaN	0.41101	NaN	NaN	NaN	NaN	NaN	NaN	0.82497	0.52975	0.49074	0.38703	NaN	NaN	NaN	NaN	NaN	NaN	NaN	NaN	NaN	NaN	NaN	NaN	NaN	NaN	S	3			0.99988	0.00493008	123.1	76.205	123.1	-0.39606	63645000	43870000	19775000	488
NaN	NaN	NaN	NaN	NaN	NaN	NaN	NaN	NaN	NaN	NaN	NaN	NaN	NaN	NaN	NaN	NaN	NaN	NaN	NaN	NaN	NaN	NaN	NaN	NaN	NaN	NaN	NaN	NaN	NaN	NaN	NaN	NaN	NaN	NaN	NaN	S	2			0.333147	0.00449924	80.318	48.971	80.318	0.38508	0	0	0	498
NaN	NaN	NaN	NaN	NaN	NaN	NaN	NaN	NaN	NaN	NaN	NaN	NaN	NaN	NaN	NaN	NaN	NaN	NaN	NaN	NaN	NaN	NaN	NaN	NaN	NaN	NaN	NaN	NaN	NaN	NaN	NaN	NaN	NaN	NaN	NaN	S	2			0.333147	0.00449924	80.318	48.971	80.318	0.38508	0	0	0	499
NaN	NaN	NaN	NaN	NaN	NaN	NaN	NaN	NaN	NaN	NaN	NaN	NaN	NaN	NaN	NaN	NaN	NaN	NaN	NaN	NaN	NaN	NaN	NaN	NaN	NaN	NaN	NaN	NaN	NaN	NaN	NaN	NaN	NaN	NaN	NaN	S	3			0.320983	0.000231076	58.087	37.076	58.087	0.096292	0	0	0	51
NaN	NaN	NaN	NaN	NaN	NaN	NaN	NaN	NaN	NaN	NaN	NaN	NaN	NaN	NaN	NaN	NaN	NaN	NaN	NaN	NaN	NaN	NaN	NaN	NaN	NaN	NaN	NaN	NaN	NaN	NaN	NaN	NaN	NaN	NaN	NaN	S	3			0.330138	4.42988e-05	66.401	49.187	66.401	0.047429	0	0	0	55
NaN	NaN	NaN	NaN	NaN	NaN	NaN	NaN	NaN	NaN	NaN	NaN	NaN	NaN	NaN	NaN	NaN	NaN	NaN	0.57235	NaN	NaN	NaN	NaN	NaN	NaN	NaN	NaN	NaN	NaN	NaN	NaN	NaN	NaN	NaN	NaN	S	3			0.652027	4.54761e-05	66.017	47.951	66.017	-0.63103	46240000	35259000	10981000	60
NaN	NaN	NaN	NaN	NaN	NaN	NaN	NaN	NaN	NaN	NaN	NaN	NaN	NaN	NaN	NaN	NaN	NaN	NaN	NaN	NaN	NaN	NaN	NaN	NaN	NaN	NaN	NaN	NaN	NaN	NaN	NaN	NaN	NaN	NaN	NaN	S	3			0.4239	8.35643e-05	63.376	50.635	55.247	-0.025214	0	0	0	61
NaN	NaN	NaN	NaN	NaN	NaN	NaN	NaN	NaN	NaN	NaN	NaN	NaN	NaN	0.090482	NaN	NaN	NaN	NaN	NaN	0.50564	NaN	NaN	NaN	NaN	NaN	NaN	NaN	NaN	NaN	NaN	NaN	NaN	NaN	NaN	NaN	S	3			0.755978	8.68342e-06	78.758	57.661	78.758	0.053144	72979000	55227000	17752000	63
NaN	NaN	NaN	NaN	NaN	NaN	NaN	NaN	NaN	NaN	NaN	NaN	NaN	NaN	NaN	NaN	NaN	NaN	NaN	NaN	NaN	NaN	NaN	NaN	NaN	NaN	NaN	NaN	NaN	NaN	NaN	NaN	NaN	NaN	NaN	NaN	S	3			0.361284	0.000271535	61.612	38.404	40.706	-0.071218	0	0	0	72
1.028	0.52579	0.55232	0.45718	0.45515	0.43108	0.31757	0.40679	0.29403	0.17793	0.1478	NaN	0.030866	0.025251	NaN	NaN	NaN	NaN	1.0893	0.68249	0.56811	0.51555	0.44859	0.38538	0.34566	0.23664	0.18904	0.16291	0.16328	0.05127	0.051635	NaN	0.026861	0.028078	NaN	NaN	S	3			1	6.04883e-05	305.6	245.7	305.6	-0.05502	2133400000	1506800000	626660000	201
1.2755	0.68298	0.63734	0.57901	0.62497	0.54843	0.45932	0.61062	1.8572	0.49675	0.36165	0.15677	0.1159	0.10136	3.4141	NaN	3.0442	3.7921	1.1985	0.69145	0.5194	0.58476	0.57277	0.43447	0.50846	0.45585	0.39225	0.47021	0.41665	0.1952	0.13339	0.12689	0.12402	0.15573	0.20893	0.24586	S	2			1	3.37184e-19	166.62	121.28	141	0.50767	991610000	663740000	327860000	2455
0.90689	0.68298	0.63734	0.57901	0.59489	0.57814	0.43313	NaN	0.45996	0.47377	0.39742	0.15677	0.1159	0.10136	NaN	NaN	NaN	0.13201	1.1985	0.69145	0.51494	0.57119	0.57277	0.43447	0.50846	0.44858	0.40236	0.48959	0.39353	0.1952	0.13339	NaN	0.12402	NaN	0.20893	NaN	S	2			0.999677	3.37184e-19	166.62	121.28	124.62	1.0409	714030000	500450000	213580000	2459
1.0009	NaN	NaN	NaN	NaN	NaN	NaN	NaN	0.53969	NaN	NaN	NaN	NaN	NaN	NaN	NaN	NaN	NaN	NaN	NaN	NaN	NaN	NaN	NaN	NaN	NaN	NaN	NaN	NaN	NaN	NaN	NaN	NaN	NaN	NaN	NaN	S	3			0.84319	0.00197357	83.37	55.603	83.37	-0.097117	43551000	25226000	18325000	2462
NaN	NaN	NaN	NaN	NaN	NaN	NaN	0.7207	NaN	NaN	NaN	NaN	NaN	NaN	NaN	NaN	NaN	NaN	NaN	NaN	NaN	NaN	NaN	NaN	NaN	NaN	NaN	NaN	NaN	NaN	NaN	0.12689	NaN	NaN	NaN	0.24586	S	3			0.960698	0.000531572	100.23	65.963	100.23	0.0086376	37997000	23770000	14228000	2463
0.99137	NaN	NaN	NaN	NaN	0.43879	NaN	1.1419	0.67097	NaN	0.4561	NaN	NaN	NaN	NaN	NaN	NaN	NaN	0.92473	0.46697	NaN	0.38533	0.66672	0.62198	NaN	NaN	NaN	0.37152	NaN	NaN	0.52553	NaN	NaN	NaN	NaN	NaN	S	3			1	0.000778515	181.87	133.41	181.87	0.0049509	65921000	40514000	25407000	2440
NaN	NaN	NaN	NaN	NaN	NaN	NaN	NaN	NaN	NaN	NaN	NaN	NaN	NaN	NaN	NaN	NaN	NaN	NaN	NaN	NaN	NaN	NaN	NaN	NaN	NaN	NaN	NaN	0.70147	NaN	NaN	NaN	NaN	NaN	NaN	NaN	S	3			0.891701	0.00178125	43.807	35.774	40.849	-0.080413	7437200	5540800	1896300	1745
NaN	NaN	NaN	NaN	NaN	NaN	NaN	NaN	NaN	NaN	NaN	NaN	NaN	NaN	NaN	NaN	NaN	NaN	NaN	NaN	NaN	NaN	NaN	NaN	0.79585	NaN	NaN	0.63975	NaN	NaN	NaN	NaN	NaN	NaN	NaN	NaN	S	3			0.629359	0.00150716	45.042	28.205	45.042	0.036063	9190000	5389500	3800400	1749
NaN	NaN	NaN	NaN	NaN	NaN	NaN	NaN	NaN	NaN	NaN	NaN	NaN	NaN	NaN	NaN	NaN	NaN	NaN	NaN	NaN	NaN	NaN	NaN	NaN	NaN	NaN	NaN	NaN	NaN	NaN	NaN	NaN	NaN	NaN	NaN	S	3			0.483754	0.00178125	43.807	35.774	43.807	-0.14673	0	0	0	1762
NaN	NaN	NaN	NaN	NaN	NaN	NaN	NaN	NaN	NaN	NaN	NaN	NaN	NaN	NaN	NaN	NaN	NaN	NaN	NaN	NaN	NaN	NaN	NaN	0.79585	NaN	NaN	0.63975	NaN	NaN	NaN	NaN	NaN	NaN	NaN	NaN	S	3			0.710747	0.00150716	45.042	28.205	40.849	-0.080413	12341000	8540400	3800400	1763
NaN	NaN	NaN	NaN	NaN	NaN	NaN	NaN	NaN	NaN	NaN	NaN	NaN	NaN	NaN	NaN	NaN	NaN	NaN	NaN	NaN	NaN	NaN	NaN	NaN	NaN	NaN	NaN	NaN	NaN	NaN	NaN	NaN	NaN	NaN	NaN	S	2			0.532232	0.00189559	86.189	53.19	86.189	0.25299	6651300	6651300	0	2429
NaN	NaN	NaN	NaN	NaN	NaN	NaN	NaN	NaN	NaN	NaN	NaN	NaN	NaN	NaN	NaN	NaN	NaN	NaN	NaN	NaN	NaN	NaN	NaN	NaN	NaN	NaN	NaN	1.3086	NaN	NaN	NaN	NaN	NaN	NaN	NaN	S	3			0.956319	6.06097e-05	62.582	39.727	56.688	-0.2659	17968000	1455800	16512000	2492
NaN	NaN	NaN	NaN	NaN	NaN	NaN	NaN	NaN	NaN	NaN	NaN	NaN	NaN	NaN	NaN	NaN	NaN	NaN	NaN	NaN	NaN	NaN	NaN	NaN	NaN	NaN	NaN	NaN	NaN	NaN	NaN	NaN	NaN	NaN	NaN	S	3			0.731271	2.80901e-08	90.062	67.299	90.062	0.3777	4026100	0	4026100	2495
NaN	NaN	NaN	NaN	NaN	NaN	NaN	NaN	NaN	NaN	NaN	NaN	NaN	NaN	NaN	NaN	NaN	NaN	NaN	NaN	NaN	NaN	NaN	NaN	NaN	NaN	NaN	NaN	NaN	NaN	NaN	NaN	NaN	NaN	NaN	NaN	S	3			0.408719	0.000122968	52.674	34.914	45.941	-0.085201	0	0	0	2499
0.96968	0.56243	0.56273	0.42998	0.55826	0.6841	0.73941	0.97095	NaN	0.47833	NaN	NaN	0.37098	NaN	NaN	NaN	NaN	NaN	1.2597	0.85832	0.58724	0.74436	0.636	0.88749	NaN	NaN	NaN	NaN	NaN	NaN	NaN	NaN	NaN	NaN	NaN	NaN	S	3			0.999413	1.81429e-05	274.45	105.69	161.19	0.11634	183140000	115020000	68126000	2282
NaN	NaN	NaN	NaN	NaN	NaN	NaN	NaN	NaN	NaN	NaN	NaN	NaN	NaN	NaN	NaN	NaN	NaN	NaN	NaN	NaN	NaN	NaN	NaN	NaN	NaN	NaN	NaN	NaN	NaN	NaN	NaN	NaN	NaN	NaN	NaN	S	3			0.77181	9.06798e-05	81.48	39.076	81.48	0.29013	2028900	2028900	0	1809
NaN	NaN	NaN	NaN	NaN	NaN	NaN	NaN	NaN	NaN	NaN	NaN	NaN	NaN	NaN	NaN	0.91356	NaN	NaN	NaN	NaN	NaN	NaN	NaN	NaN	NaN	NaN	NaN	NaN	NaN	NaN	NaN	NaN	NaN	NaN	NaN	S	3			0.542304	1.55287e-07	91.238	71.658	91.238	-0.27534	2195400	1156400	1039000	1814
NaN	NaN	0.91693	1.587	NaN	NaN	NaN	0.99133	1.3843	1.5604	1.5024	NaN	NaN	0.9081	NaN	NaN	NaN	NaN	NaN	NaN	NaN	NaN	NaN	NaN	NaN	NaN	NaN	NaN	0.94804	NaN	0.7532	0.69135	1.3648	0.82292	0.43709	NaN	S	3			0.992752	4.51658e-28	165.58	126.7	102.21	-0.39334	59369000	32691000	26679000	1818
NaN	NaN	NaN	NaN	NaN	NaN	NaN	NaN	NaN	NaN	NaN	NaN	NaN	NaN	NaN	NaN	NaN	NaN	NaN	NaN	NaN	NaN	NaN	NaN	0.9025	0.75578	0.89766	0.95733	1.1418	1.1118	NaN	NaN	NaN	NaN	0.64899	0.62296	S	3			0.555266	0.00214395	56.442	28.518	56.442	0.15859	67555000	35987000	31568000	1358
NaN	NaN	NaN	NaN	NaN	NaN	NaN	NaN	NaN	NaN	NaN	NaN	NaN	NaN	NaN	NaN	0.85214	NaN	NaN	NaN	NaN	NaN	NaN	0.55474	NaN	NaN	NaN	NaN	NaN	NaN	NaN	NaN	NaN	NaN	NaN	NaN	S	3			0.71176	8.45916e-05	69.765	50.51	48.616	0.095459	30471000	18528000	11943000	1361
NaN	NaN	NaN	NaN	NaN	NaN	NaN	NaN	NaN	NaN	NaN	NaN	NaN	NaN	NaN	NaN	NaN	NaN	NaN	NaN	NaN	NaN	NaN	NaN	NaN	NaN	NaN	NaN	NaN	NaN	NaN	NaN	NaN	1.4189	1.4944	NaN	S	3			0.988059	0.00095196	113.44	59.355	113.44	-0.46814	4939900	2580400	2359500	117
NaN	NaN	NaN	1.6257	1.936	1.3879	NaN	1.6292	1.0404	1.0551	0.55369	NaN	NaN	NaN	NaN	NaN	NaN	NaN	1.0103	1.8424	1.3468	1.0311	1.744	NaN	NaN	NaN	NaN	NaN	NaN	NaN	NaN	NaN	NaN	NaN	NaN	NaN	S	3			1	0.000233632	169.65	104.94	160.77	-0.76204	491090000	212010000	279080000	427
1.0526	NaN	0.59079	NaN	NaN	0.37401	NaN	NaN	0.20004	NaN	NaN	NaN	NaN	NaN	NaN	NaN	NaN	NaN	1.0723	NaN	0.4752	NaN	NaN	NaN	NaN	NaN	NaN	NaN	NaN	NaN	NaN	NaN	NaN	NaN	NaN	NaN	S	2			0.720497	0.00041813	97.163	43.596	77.744	0.35162	692840000	459170000	233670000	413
1.0331	0.78869	0.82697	0.84192	0.89598	0.89882	0.70961	1.1148	0.97756	0.73656	0.83409	0.82824	0.82519	0.95075	0.83279	0.77378	0.76496	0.62154	1.0723	0.80025	0.7221	0.76869	0.80612	0.83361	0.76756	0.82446	0.78654	0.7919	0.97088	0.57471	0.91239	0.67656	0.65674	0.72492	0.72684	0.68692	S	3			1	1.4166e-07	280.21	280.21	250.38	-0.46165	52797000000	29661000000	23136000000	361
NaN	NaN	NaN	NaN	NaN	NaN	NaN	2.9709	NaN	NaN	NaN	NaN	NaN	NaN	NaN	NaN	NaN	NaN	NaN	NaN	NaN	NaN	NaN	NaN	NaN	NaN	NaN	NaN	NaN	NaN	NaN	NaN	NaN	NaN	NaN	NaN	S	2			0.861672	0.000450485	90.498	67.029	90.498	-0.94356	10958000	1460500	9497900	325
NaN	NaN	NaN	NaN	NaN	NaN	NaN	NaN	NaN	NaN	NaN	NaN	NaN	NaN	NaN	NaN	NaN	NaN	NaN	NaN	NaN	NaN	NaN	NaN	NaN	NaN	NaN	NaN	NaN	NaN	NaN	NaN	NaN	NaN	NaN	NaN	S	3			0.31645	1.93051e-06	77.543	55.974	77.543	0.54513	0	0	0	18
NaN	NaN	NaN	NaN	NaN	NaN	NaN	NaN	NaN	NaN	NaN	NaN	NaN	NaN	NaN	NaN	NaN	NaN	NaN	NaN	NaN	NaN	NaN	NaN	NaN	NaN	NaN	NaN	NaN	NaN	NaN	NaN	NaN	NaN	NaN	NaN	S	3			0.514801	0.00456591	46.862	20.991	46.862	-0.43385	8090900	8090900	0	20
NaN	NaN	NaN	NaN	NaN	NaN	NaN	NaN	0.9523	NaN	NaN	NaN	NaN	NaN	NaN	NaN	NaN	NaN	NaN	NaN	NaN	0.66748	NaN	NaN	NaN	NaN	NaN	0.72625	NaN	NaN	NaN	NaN	NaN	NaN	NaN	NaN	S	3			0.885101	0.000330918	61.039	29.972	44.158	0.12835	58426000	28843000	29583000	128
NaN	NaN	NaN	NaN	NaN	NaN	NaN	NaN	NaN	NaN	NaN	NaN	NaN	NaN	NaN	NaN	NaN	NaN	NaN	NaN	NaN	NaN	NaN	NaN	NaN	NaN	NaN	NaN	NaN	NaN	NaN	NaN	NaN	NaN	NaN	NaN	S	3			0.652796	0.000270152	65.677	44.26	65.677	-0.24991	8681800	8681800	0	130
0.83129	NaN	NaN	NaN	NaN	NaN	NaN	NaN	NaN	NaN	NaN	NaN	NaN	NaN	NaN	NaN	NaN	NaN	NaN	NaN	NaN	NaN	NaN	NaN	NaN	NaN	NaN	NaN	NaN	NaN	NaN	NaN	NaN	NaN	NaN	NaN	S	2			0.812623	9.88792e-05	95.996	62.079	95.996	0.017228	7874700	5830200	2044500	610
NaN	NaN	NaN	NaN	NaN	NaN	NaN	NaN	NaN	NaN	NaN	NaN	NaN	NaN	NaN	NaN	NaN	NaN	NaN	NaN	NaN	NaN	NaN	NaN	NaN	NaN	NaN	NaN	NaN	NaN	NaN	NaN	NaN	NaN	NaN	NaN	S	2			0.425805	0.00030693	81.477	62.079	81.477	-0.085568	0	0	0	611
NaN	0.65645	0.51802	NaN	NaN	NaN	2.302	NaN	NaN	NaN	NaN	NaN	NaN	NaN	NaN	NaN	NaN	NaN	NaN	NaN	0.47689	NaN	NaN	0.55729	0.55353	0.37351	NaN	0.40697	0.39896	NaN	NaN	NaN	NaN	NaN	NaN	NaN	S	2			0.993218	5.98218e-05	115.55	89.115	60.826	-0.21836	55780000	31027000	24753000	616
NaN	NaN	NaN	NaN	NaN	NaN	NaN	NaN	NaN	NaN	NaN	NaN	NaN	NaN	0.71866	NaN	NaN	NaN	NaN	NaN	NaN	NaN	NaN	NaN	NaN	NaN	NaN	NaN	NaN	NaN	NaN	NaN	NaN	NaN	NaN	NaN	S	3			0.599087	0.000593005	60.8	48.511	48.286	0.025952	67610000	35382000	32228000	620
NaN	NaN	NaN	NaN	NaN	NaN	NaN	NaN	NaN	NaN	NaN	NaN	NaN	NaN	0.71866	NaN	NaN	NaN	NaN	NaN	NaN	NaN	NaN	NaN	NaN	NaN	NaN	0.8539	0.99799	NaN	NaN	NaN	NaN	NaN	NaN	NaN	S	3			0.679823	1.0775e-06	90.71	60.05	48.958	-0.19842	166930000	89023000	77912000	621
1.0831	NaN	NaN	0.85498	NaN	NaN	NaN	NaN	NaN	1.0168	NaN	0.68029	NaN	NaN	NaN	0.61577	NaN	NaN	NaN	0.87923	NaN	0.83863	0.69758	NaN	0.89152	NaN	NaN	NaN	0.99799	NaN	0.78242	NaN	0.70405	NaN	NaN	NaN	S	3			0.855026	3.03414e-05	78.079	60.093	49.709	0.048874	867120000	452740000	414380000	625
0.85703	0.73686	0.65646	0.73803	0.88547	0.89119	0.51069	1.0096	0.93701	0.59177	0.65403	0.90215	0.71359	0.92271	0.69969	0.54892	0.99161	0.54613	1.0439	0.92347	0.61928	0.77136	1.0036	NaN	0.66402	NaN	0.61968	0.80462	0.75649	NaN	1.0648	NaN	0.72599	1.0554	NaN	0.90845	S	3			1	0.000387529	169.09	121.45	133.98	-0.13336	290950000	161940000	129010000	727
1.1453	NaN	0.89674	0.71662	NaN	0.80805	0.74723	0.82639	NaN	NaN	NaN	0.67171	NaN	NaN	NaN	NaN	0.20408	NaN	1.1612	0.86098	1.0832	0.85547	0.91568	0.67807	0.74104	0.72302	0.67274	0.76848	0.79234	0.59942	0.47595	NaN	NaN	NaN	NaN	NaN	S	3			0.999978	1.82642e-06	95.227	78.916	88.471	-0.27877	712030000	443050000	268980000	815
NaN	NaN	NaN	NaN	NaN	NaN	NaN	NaN	NaN	NaN	NaN	NaN	NaN	NaN	NaN	NaN	NaN	NaN	NaN	NaN	NaN	NaN	NaN	NaN	NaN	NaN	NaN	NaN	NaN	NaN	NaN	NaN	NaN	NaN	NaN	NaN	S	3			0.464502	3.02855e-05	86.987	56.764	86.987	0.0060465	0	0	0	440
NaN	NaN	NaN	NaN	NaN	NaN	NaN	NaN	NaN	NaN	NaN	NaN	NaN	NaN	NaN	NaN	NaN	NaN	NaN	NaN	NaN	NaN	NaN	NaN	NaN	NaN	NaN	NaN	NaN	NaN	NaN	NaN	NaN	NaN	NaN	NaN	S	3			0.464502	3.02855e-05	86.987	56.764	86.987	0.0060465	0	0	0	442
NaN	NaN	0.89461	NaN	1.069	1.2364	0.90386	1.0328	0.97368	0.42426	0.50997	NaN	NaN	NaN	NaN	NaN	NaN	NaN	1.1639	1.3453	2.6003	1.3083	1.1461	1.2707	NaN	0.93409	0.6836	NaN	0.70838	NaN	NaN	NaN	NaN	NaN	NaN	NaN	S	3			0.95921	2.31101e-05	104.96	67.925	79.332	-0.4893	3815700000	2432600000	1383100000	435
NaN	NaN	NaN	NaN	NaN	NaN	NaN	NaN	NaN	NaN	NaN	NaN	NaN	NaN	NaN	NaN	NaN	NaN	NaN	NaN	NaN	NaN	NaN	NaN	NaN	NaN	NaN	NaN	NaN	NaN	NaN	NaN	NaN	NaN	NaN	NaN	S	3			1	0.00190121	182.39	143.61	182.39	-0.4465	6124400	6124400	0	548
NaN	NaN	NaN	NaN	NaN	NaN	NaN	NaN	NaN	NaN	NaN	0.5598	0.77201	0.8179	NaN	NaN	0.90707	NaN	NaN	NaN	0.69553	NaN	NaN	NaN	NaN	NaN	NaN	NaN	NaN	NaN	NaN	NaN	NaN	NaN	0.78325	NaN	S	2			0.803191	0.003795	52.97	32.978	52.97	-0.075116	43341000	24491000	18849000	66
0.92969	0.58614	0.84247	0.895	NaN	NaN	NaN	NaN	NaN	0.75299	NaN	0.62245	NaN	NaN	0.39777	NaN	0.3641	1.598	NaN	NaN	NaN	NaN	NaN	0.78166	0.77572	0.66897	0.66872	0.79227	NaN	NaN	NaN	NaN	0.5659	0.68276	NaN	0.59139	S	3			0.973853	0.000153759	71.634	48.979	44.158	-0.040401	310160000	203430000	106730000	67
1.1204	0.72859	0.49807	0.40116	0.42287	0.40492	NaN	NaN	NaN	NaN	NaN	NaN	NaN	NaN	NaN	NaN	NaN	NaN	NaN	NaN	NaN	NaN	NaN	NaN	NaN	NaN	NaN	NaN	NaN	NaN	NaN	NaN	NaN	NaN	NaN	NaN	S	3			1	0.000807521	222.81	183.82	222.81	-0.091594	79762000	44350000	35412000	327
NaN	NaN	NaN	0.63094	NaN	NaN	NaN	NaN	NaN	0.36148	NaN	NaN	NaN	0.13379	NaN	NaN	NaN	NaN	NaN	0.63281	NaN	0.5914	NaN	0.52037	NaN	NaN	NaN	NaN	NaN	NaN	NaN	NaN	NaN	NaN	0.1122	0.14074	S	2			0.965706	4.18996e-23	174.72	113.59	156.13	-0.38567	172390000	128090000	44304000	951
NaN	0.74711	NaN	NaN	NaN	NaN	NaN	NaN	NaN	NaN	NaN	NaN	NaN	NaN	NaN	NaN	NaN	NaN	NaN	NaN	NaN	NaN	NaN	NaN	NaN	NaN	NaN	NaN	NaN	NaN	NaN	NaN	NaN	NaN	NaN	NaN	S	3			0.705198	0.00160107	148.18	87.785	69.431	0.031331	17185000	8624600	8560100	954
1.0275	0.69341	0.69918	0.68699	NaN	0.59392	0.58348	0.77594	0.65768	0.46735	NaN	0.57429	0.45946	0.35835	NaN	0.2562	0.16695	0.17096	0.87878	0.76033	0.62927	0.60094	0.67087	0.64608	0.62375	0.53855	0.59295	NaN	0.42339	NaN	0.2176	NaN	0.32417	NaN	0.37486	NaN	S	3			1	9.52598e-32	185.92	150.83	84.169	-0.44094	680580000	461170000	219410000	438
NaN	NaN	NaN	NaN	NaN	NaN	NaN	NaN	0.98756	NaN	NaN	0.97574	NaN	NaN	NaN	0.70065	NaN	NaN	NaN	NaN	NaN	NaN	NaN	0.83666	NaN	NaN	0.97602	0.83853	NaN	0.64602	1.1217	0.94355	NaN	NaN	NaN	NaN	S	3			0.748302	1.25458e-05	81.97	67.08	41.65	-0.74484	218970000	128300000	90664000	392
NaN	NaN	NaN	NaN	NaN	NaN	NaN	NaN	NaN	NaN	NaN	NaN	NaN	NaN	NaN	NaN	NaN	NaN	NaN	NaN	NaN	NaN	NaN	NaN	NaN	NaN	NaN	NaN	NaN	NaN	NaN	NaN	NaN	NaN	NaN	NaN	S	3			0.435165	0.00296386	58.123	35.241	58.123	0.070157	0	0	0	543
1.0878	0.77361	NaN	0.76437	0.67137	0.85595	0.70293	0.95761	NaN	0.6655	NaN	0.93188	NaN	NaN	0.82747	NaN	NaN	NaN	NaN	NaN	0.46144	0.74421	0.69834	NaN	NaN	NaN	NaN	NaN	0.81199	0.57845	NaN	0.79503	0.86454	0.7901	0.7471	NaN	S	2			0.993984	0.00074221	80.316	36.314	77.505	0.8677	180110000	110650000	69464000	391
NaN	NaN	NaN	NaN	NaN	NaN	NaN	NaN	NaN	NaN	NaN	NaN	NaN	NaN	NaN	NaN	NaN	NaN	NaN	NaN	NaN	NaN	NaN	0.95449	0.72876	NaN	NaN	0.47094	0.80172	NaN	NaN	NaN	NaN	NaN	NaN	NaN	S	2			0.844343	0.00114251	84.479	34.126	84.479	0.052909	8788200	4800600	3987700	160
1.0125	1.0787	0.89753	0.73936	0.75438	0.92924	1.2008	NaN	0.99834	1.538	0.89245	NaN	1.0069	NaN	0.95814	NaN	NaN	0.4746	1.071	0.88733	2.7757	0.65692	0.74771	0.73866	1.1354	1.125	0.9288	0.80006	1.1517	1.1197	0.6313	0.76902	NaN	0.41237	0.6632	0.44371	S	4			0.999753	7.84808e-05	115.83	96.428	91.076	-0.37373	1549900000	832630000	717220000	91
1.0349	NaN	NaN	0.79022	0.94821	1.1763	1.2149	0.97681	NaN	1.8311	NaN	0.55265	NaN	NaN	NaN	0.88523	NaN	0.60566	1.2525	0.95802	NaN	NaN	NaN	NaN	1.0097	1.0364	NaN	NaN	NaN	NaN	0.61304	0.84639	0.644	0.62369	0.79226	NaN	S	3			0.997039	6.50863e-06	81.017	61.192	81.017	-0.09404	1418400000	768220000	650170000	96
NaN	NaN	NaN	NaN	NaN	NaN	NaN	NaN	NaN	NaN	NaN	NaN	NaN	NaN	NaN	NaN	NaN	NaN	NaN	NaN	NaN	NaN	NaN	NaN	NaN	NaN	NaN	NaN	NaN	NaN	NaN	NaN	NaN	NaN	NaN	NaN	S	4			0.332505	0.00387116	60.489	29.894	60.489	-0.079233	0	0	0	183
1.0047	NaN	NaN	NaN	0.79111	NaN	0.82572	0.72799	NaN	NaN	0.99773	NaN	0.63338	NaN	NaN	NaN	NaN	NaN	NaN	NaN	NaN	NaN	NaN	0.72175	0.63366	0.78719	0.8236	NaN	0.85682	0.61411	0.73543	0.54673	NaN	NaN	NaN	NaN	S	2			0.986554	0.000400637	97.957	38.608	58.592	0.33872	63334000	35954000	27380000	644
0.9866	0.73942	NaN	NaN	0.67614	NaN	NaN	NaN	NaN	0.50888	0.40589	0.19155	NaN	NaN	NaN	NaN	NaN	NaN	NaN	NaN	0.96695	NaN	NaN	NaN	0.70422	NaN	NaN	NaN	NaN	NaN	NaN	NaN	NaN	NaN	NaN	NaN	S	3			0.802801	0.000164338	65.949	41.568	48.677	0.030618	377280000	233570000	143710000	251
0.9866	0.73942	0.67889	NaN	0.67614	0.7212	0.66612	0.70657	NaN	0.50888	0.40589	0.19155	NaN	NaN	NaN	NaN	NaN	NaN	1.0797	0.76875	0.96695	0.71614	0.72484	NaN	0.70422	NaN	0.50931	NaN	0.51487	NaN	NaN	NaN	NaN	NaN	NaN	NaN	S	3			0.955794	1.94823e-05	78.228	61.918	52.52	0.081089	620320000	417550000	202760000	252
NaN	NaN	NaN	NaN	NaN	NaN	NaN	NaN	NaN	NaN	0.72901	NaN	NaN	NaN	NaN	NaN	NaN	NaN	NaN	NaN	NaN	NaN	NaN	NaN	NaN	NaN	0.67668	NaN	NaN	NaN	NaN	NaN	NaN	NaN	NaN	NaN	S	3			0.69616	0.00121225	59.005	42.413	48.771	-0.04187	230290000	133560000	96723000	431
NaN	NaN	NaN	NaN	NaN	NaN	NaN	NaN	NaN	NaN	NaN	NaN	NaN	NaN	NaN	NaN	NaN	NaN	NaN	NaN	NaN	NaN	NaN	NaN	NaN	NaN	NaN	NaN	NaN	NaN	NaN	NaN	NaN	NaN	NaN	NaN	S	3			0.436736	0.00121225	59.005	42.413	54.656	-0.014506	0	0	0	433
1.0262	0.69023	0.64331	0.61692	0.83469	0.67736	0.73749	0.91713	0.83449	0.451	0.72469	NaN	0.70871	0.75568	0.63974	0.65461	0.75105	0.62854	1.0017	0.73108	1.3617	0.87435	0.69879	0.68846	0.78031	0.8728	0.91724	0.59312	0.84643	NaN	0.75161	0.77401	0.71933	0.57445	0.86652	0.66416	S	3			0.996227	3.75343e-16	327.94	261.37	302.85	-0.25057	11735000000	6553700000	5181000000	436
0.95747	0.71079	0.68511	0.75713	0.85466	NaN	NaN	1.131	NaN	NaN	0.69797	0.9877	NaN	NaN	0.7612	NaN	NaN	NaN	NaN	NaN	NaN	NaN	NaN	1.0421	0.82702	0.88676	0.69998	0.77185	0.93195	0.80952	1.2754	0.77603	0.82058	1.1561	0.82525	1.1169	S	2			1	0.00623466	125.71	76.647	46.844	0.28696	341280000	178160000	163120000	417
0.99579	0.89141	0.73568	0.77553	0.73246	NaN	NaN	0.79513	NaN	NaN	NaN	NaN	0.39722	NaN	NaN	0.15704	NaN	NaN	1.067	0.83022	NaN	NaN	NaN	NaN	NaN	0.71621	NaN	NaN	NaN	NaN	0.36613	0.3009	0.22524	0.14176	NaN	NaN	S	2			0.906545	0.000919013	83.751	54.68	81.01	-0.32054	164580000	103960000	60626000	13
0.99428	0.89389	0.77198	0.6547	0.73246	0.78203	0.74452	0.83804	0.91545	0.81548	0.60888	0.47199	NaN	0.25298	0.22587	0.15704	NaN	0.077662	0.91612	0.85646	1.0078	0.83732	0.66613	0.78011	0.67429	0.71621	0.6492	0.62211	0.6632	0.47465	0.37394	NaN	0.24376	0.16145	NaN	NaN	S	3			0.999631	0.000456707	184.71	130.36	164.33	-0.4472	604980000	366220000	238760000	14
NaN	NaN	NaN	NaN	NaN	NaN	NaN	NaN	NaN	NaN	NaN	NaN	NaN	NaN	NaN	NaN	NaN	NaN	NaN	NaN	NaN	NaN	NaN	NaN	NaN	NaN	NaN	NaN	NaN	NaN	NaN	NaN	NaN	NaN	NaN	NaN	S	3			0.354707	0.00205548	169.09	129.53	121.73	-0.039652	0	0	0	455
1.0475	0.76041	NaN	0.49905	0.52297	0.44277	NaN	NaN	0.54747	NaN	NaN	0.55437	0.45699	0.52302	NaN	0.30164	0.30098	NaN	1.0801	NaN	NaN	NaN	NaN	NaN	NaN	NaN	NaN	0.50989	NaN	NaN	NaN	0.39852	NaN	0.34895	NaN	NaN	S	2			0.906006	8.39923e-10	145.69	115.87	145.69	-0.090728	270280000	168790000	101490000	456
0.9993	0.4874	0.45726	0.58357	0.62527	0.76108	0.39872	0.68048	0.61054	0.30386	0.42593	1.3169	0.70568	NaN	0.3502	0.3459	0.3194	0.19335	1.1316	0.56385	0.78625	0.46597	0.57531	0.48213	NaN	0.37367	0.4218	NaN	0.48756	0.50998	0.53972	0.4313	0.41051	NaN	0.28354	0.26405	S	2			0.993769	5.90896e-06	204.56	171.56	108.25	-0.16541	567470000	361900000	205570000	457
1.2123	NaN	NaN	0.55929	0.62527	0.44277	0.37401	0.64651	0.54747	0.58245	0.45673	0.55437	0.45699	NaN	0.3766	0.30164	0.30098	0.19335	NaN	NaN	0.3667	0.46597	0.5082	NaN	0.46903	0.37367	0.4218	0.50989	0.48756	0.48737	0.53972	0.39852	0.38646	0.34895	NaN	0.26405	S	3			0.975549	8.39923e-10	204.56	171.56	127.78	-0.35993	539340000	354510000	184830000	459
1.046	0.50776	0.45363	NaN	0.57906	0.50406	NaN	0.71624	0.61054	0.30386	0.48975	0.35388	0.46626	0.52201	0.40499	0.3459	0.3194	0.19341	1.1316	0.56385	0.78625	0.58183	NaN	0.48213	0.50369	NaN	0.4218	0.51947	NaN	NaN	NaN	0.4313	0.43606	NaN	0.28354	NaN	S	3			0.997334	4.85537e-06	204.56	171.56	204.56	-0.20975	282740000	181930000	100810000	460
NaN	0.52897	NaN	NaN	NaN	NaN	0.39872	NaN	NaN	NaN	NaN	0.62724	NaN	NaN	0.40499	NaN	NaN	NaN	NaN	NaN	NaN	NaN	0.57531	NaN	NaN	NaN	NaN	NaN	NaN	0.53363	0.55799	NaN	NaN	0.39377	NaN	NaN	S	3			0.998967	0.00169007	180.66	134.34	180.66	-0.012291	72533000	47688000	24844000	462
1.0132	0.60908	0.68994	0.69983	0.74368	0.69739	0.60138	0.81697	0.73874	0.61131	0.50449	0.41219	NaN	NaN	NaN	NaN	NaN	NaN	1.1138	0.70447	0.59719	0.73091	0.71605	0.81263	0.72088	0.66473	0.63581	0.65162	0.70954	0.42395	0.33863	0.1473	0.25429	NaN	NaN	NaN	S	3			1	3.30468e-15	174.02	131.94	174.02	-0.14701	1448500000	952830000	495680000	243
NaN	NaN	NaN	NaN	NaN	NaN	NaN	NaN	NaN	NaN	NaN	NaN	NaN	NaN	NaN	NaN	NaN	NaN	NaN	NaN	NaN	NaN	NaN	NaN	NaN	NaN	NaN	NaN	NaN	NaN	NaN	NaN	NaN	NaN	NaN	NaN	S	3			1	0.00180184	202.32	147.98	202.32	-0.10141	13431000	13431000	0	483
NaN	0.51887	0.62944	NaN	NaN	NaN	NaN	1.1611	NaN	NaN	NaN	1.0258	0.73744	1.1249	0.63196	NaN	NaN	NaN	NaN	NaN	NaN	NaN	NaN	NaN	NaN	NaN	NaN	NaN	NaN	NaN	NaN	NaN	NaN	NaN	NaN	NaN	S	2			0.81932	0.000104831	100.58	70.665	81.656	-0.65141	25971000	12186000	13785000	414
NaN	NaN	NaN	NaN	NaN	NaN	NaN	NaN	NaN	NaN	NaN	NaN	NaN	NaN	NaN	NaN	NaN	NaN	NaN	NaN	NaN	NaN	NaN	NaN	NaN	NaN	NaN	NaN	NaN	NaN	NaN	NaN	NaN	NaN	NaN	NaN	S	4			0.886849	6.1255e-05	60.797	38.938	60.797	0.28126	3730600	0	3730600	208
NaN	NaN	NaN	0.71808	0.75098	0.64209	0.56736	0.77609	NaN	0.65139	0.5785	0.74778	0.70427	NaN	0.87321	0.78239	0.64204	0.72264	1.0907	0.71436	0.57106	NaN	NaN	NaN	NaN	NaN	NaN	NaN	NaN	0.70422	NaN	0.72113	NaN	0.79223	0.89666	0.72519	S	2			1	0.000304345	102.33	71.768	90.793	0.31688	107290000	63337000	43951000	530
1.0233	0.6409	0.67428	0.63473	0.62045	0.7479	0.53977	0.92862	NaN	0.65435	0.57496	0.64893	0.57246	0.55158	0.50028	0.46208	0.42786	0.34527	0.99698	0.79199	0.62749	0.63597	0.66382	0.65428	0.74905	0.40607	0.58092	0.55624	0.63862	0.54081	0.60712	0.57045	NaN	NaN	0.38771	0.312	S	2			1	6.44233e-15	168.93	121.32	62.469	-0.41618	825200000	497000000	328200000	302
0.90982	NaN	0.63692	NaN	NaN	0.58261	NaN	NaN	0.5447	0.58648	0.59457	0.63863	NaN	0.65186	NaN	0.46828	NaN	0.38811	NaN	0.58524	NaN	0.74466	0.63105	0.69349	0.88779	NaN	NaN	NaN	NaN	NaN	0.88992	0.59506	0.5879	0.58857	0.33172	0.43873	S	2			1	0.000600692	84.403	62.075	59.15	-0.297	126420000	76238000	50185000	651
NaN	NaN	NaN	NaN	NaN	NaN	NaN	NaN	NaN	NaN	NaN	NaN	NaN	NaN	NaN	NaN	NaN	NaN	NaN	NaN	NaN	NaN	NaN	NaN	NaN	NaN	NaN	NaN	NaN	NaN	NaN	NaN	NaN	NaN	NaN	NaN	S	3			0.499713	0.00015055	88.565	59.466	58.693	-0.1842	0	0	0	278
NaN	NaN	NaN	NaN	NaN	NaN	NaN	NaN	NaN	NaN	NaN	NaN	NaN	NaN	NaN	NaN	NaN	NaN	NaN	0.54471	NaN	NaN	NaN	NaN	NaN	NaN	NaN	NaN	NaN	NaN	NaN	0.71614	0.89625	NaN	1.3075	1.0125	S	2			0.796481	3.30198e-12	144.95	99.074	85.376	0.30317	20852000	11203000	9649000	280
1.2357	NaN	0.99723	NaN	NaN	0.77501	0.69796	0.80255	0.78101	0.62538	NaN	NaN	NaN	NaN	NaN	NaN	NaN	NaN	NaN	NaN	NaN	NaN	NaN	NaN	NaN	NaN	NaN	NaN	NaN	NaN	NaN	0.71614	0.89625	NaN	1.3075	1.0125	S	2			0.988398	0.00012332	172.21	130.09	107.62	4.4569	327680000	186360000	141320000	285
0.79623	0.82927	0.90567	0.78652	0.77941	0.77501	0.70503	NaN	0.97398	NaN	0.62071	0.45943	0.45953	NaN	0.35695	NaN	NaN	NaN	1.0682	0.87663	NaN	0.78309	NaN	NaN	0.74346	0.59886	0.54124	0.61493	0.65804	NaN	0.30368	0.24522	1.0506	0.27525	0.1972	1.1068	S	2			0.998793	5.34198e-34	193.02	148.78	135.08	-0.76036	996580000	596840000	399740000	288
1.045	0.76629	0.44462	0.80787	0.57196	0.85199	0.54735	0.89114	NaN	NaN	NaN	NaN	NaN	NaN	NaN	NaN	NaN	NaN	NaN	NaN	NaN	NaN	NaN	1.4218	0.72123	0.45696	0.42655	0.26478	0.494	NaN	NaN	NaN	NaN	NaN	NaN	NaN	S	2			1	4.22081e-05	123.01	86.247	77.124	0.18818	74812000	47723000	27089000	69
NaN	NaN	NaN	NaN	NaN	NaN	NaN	NaN	NaN	NaN	NaN	NaN	NaN	NaN	NaN	NaN	NaN	NaN	NaN	NaN	NaN	NaN	NaN	NaN	NaN	NaN	NaN	NaN	NaN	NaN	NaN	NaN	NaN	NaN	NaN	NaN	S	3			0.957931	0.000411769	95.183	46.651	95.183	0.37347	8000800	8000800	0	135
NaN	NaN	NaN	NaN	NaN	NaN	NaN	NaN	NaN	NaN	NaN	NaN	NaN	NaN	NaN	NaN	NaN	NaN	NaN	NaN	NaN	NaN	NaN	0.57356	1.1475	0.56	NaN	NaN	0.4079	NaN	NaN	NaN	NaN	NaN	NaN	NaN	S	4			0.955202	0.00138899	47.795	33.793	47.795	1.4723	22274000	15603000	6671000	169
NaN	NaN	NaN	NaN	NaN	NaN	NaN	NaN	NaN	NaN	NaN	NaN	NaN	NaN	NaN	NaN	NaN	NaN	NaN	NaN	NaN	NaN	NaN	NaN	NaN	NaN	NaN	NaN	NaN	NaN	NaN	NaN	NaN	NaN	NaN	NaN	S	4			0.536033	0.00138899	47.795	33.793	41.89	1.5221	3116700	3116700	0	184
NaN	NaN	NaN	NaN	NaN	NaN	NaN	NaN	NaN	NaN	NaN	NaN	NaN	NaN	NaN	NaN	NaN	NaN	NaN	NaN	NaN	NaN	NaN	NaN	NaN	NaN	NaN	NaN	NaN	NaN	NaN	NaN	NaN	NaN	NaN	NaN	S	4			0.491946	0.00138899	47.795	33.793	41.89	1.5221	0	0	0	186
1.0187	0.60141	0.52716	NaN	0.68924	0.91746	0.57928	0.79081	0.59191	0.5833	0.37789	0.35424	0.22297	0.1363	NaN	0.10506	0.16388	0.12167	1.1085	0.74558	0.72401	0.65895	0.55052	0.37029	0.53074	0.5262	0.62325	0.46962	0.6116	0.36144	0.2768	0.24239	0.1526	NaN	NaN	NaN	S	3			1	0.000238954	229.56	183.94	166.62	-0.090195	407530000	262720000	144810000	777
1.0752	0.91771	0.96205	0.8016	0.83833	0.78286	0.67336	0.70166	0.63637	0.44086	NaN	0.40247	0.38069	NaN	NaN	0.46617	NaN	0.30527	1.2687	0.79457	0.65981	0.77652	0.66872	0.63021	0.56334	0.47955	0.36179	0.34304	0.3218	NaN	NaN	NaN	NaN	NaN	NaN	NaN	S	2			1	7.48587e-19	155.57	132.21	105.65	0.26224	358570000	231320000	127250000	1520
0.89826	0.6263	0.7396	0.58401	0.6747	0.63672	0.45071	0.44381	0.24199	0.15587	NaN	NaN	NaN	NaN	NaN	NaN	NaN	NaN	0.96094	0.78689	0.79198	0.68624	0.59661	0.44721	0.34841	0.25471	NaN	0.17051	0.10922	NaN	0.087814	NaN	NaN	NaN	NaN	NaN	S	3			1	9.83202e-23	278.62	228.16	278.62	0.0025696	806040000	581370000	224680000	728
NaN	NaN	NaN	NaN	NaN	NaN	NaN	NaN	NaN	NaN	NaN	NaN	NaN	NaN	NaN	NaN	NaN	NaN	NaN	NaN	NaN	NaN	NaN	NaN	NaN	0.25471	0.12332	NaN	NaN	NaN	NaN	NaN	NaN	NaN	NaN	NaN	S	3			0.627967	0.00145718	115.78	84.892	79.92	0.0097902	27558000	22871000	4686600	731
0.77833	0.65723	0.66819	0.76293	0.79153	0.83021	0.58386	0.96864	0.76194	0.60396	0.75692	0.67338	0.71523	0.68859	0.69168	0.64823	0.60929	0.3964	1.0671	0.64208	0.56758	0.68852	0.61423	0.70782	0.61012	0.61994	0.69014	0.81664	0.67585	0.70499	0.67357	0.48732	0.54461	0.61761	0.58203	0.59341	S	3			1	3.78063e-44	322.77	246.76	170.95	1.4176	1522600000	861950000	660670000	844
NaN	NaN	NaN	NaN	NaN	NaN	NaN	NaN	NaN	NaN	NaN	NaN	NaN	NaN	NaN	NaN	NaN	NaN	NaN	NaN	NaN	NaN	NaN	NaN	NaN	NaN	NaN	NaN	NaN	NaN	NaN	NaN	NaN	NaN	NaN	NaN	S	3			0.429943	0.000574385	60.33	34.459	52.666	2.1551	0	0	0	1921
NaN	NaN	NaN	NaN	NaN	NaN	NaN	NaN	NaN	NaN	NaN	NaN	NaN	NaN	NaN	NaN	NaN	NaN	NaN	NaN	NaN	NaN	NaN	NaN	NaN	NaN	NaN	NaN	NaN	NaN	NaN	NaN	NaN	NaN	NaN	NaN	S	3			0.519513	0.000574385	55.588	35.676	46.662	0.95137	5653500	5653500	0	1923
1.0618	0.72643	0.67007	NaN	NaN	0.72281	0.6048	0.88937	NaN	0.69283	2.1226	0.67249	NaN	NaN	NaN	0.43817	0.39767	0.32887	NaN	0.74185	0.6343	NaN	0.59055	0.60525	0.66671	0.62374	0.73282	0.64758	0.81584	NaN	NaN	0.53407	0.45529	0.48404	0.44647	0.36923	S	2			0.997397	4.00618e-16	160.76	128.26	139.78	0.0013271	1033100000	614990000	418070000	2272
NaN	NaN	NaN	NaN	NaN	NaN	NaN	NaN	NaN	NaN	NaN	NaN	NaN	NaN	NaN	NaN	NaN	NaN	NaN	NaN	NaN	NaN	NaN	NaN	NaN	NaN	NaN	NaN	NaN	NaN	NaN	NaN	NaN	NaN	NaN	NaN	S	3			0.702211	0.00152213	71.002	54.777	64.547	1.0531	6175000	6175000	0	434
NaN	NaN	NaN	NaN	NaN	NaN	NaN	NaN	NaN	NaN	NaN	NaN	NaN	NaN	NaN	NaN	NaN	NaN	NaN	NaN	NaN	NaN	NaN	NaN	NaN	NaN	NaN	NaN	NaN	NaN	NaN	NaN	NaN	NaN	NaN	NaN	S	3			0.499888	0.00330002	136.39	105.04	136.39	-0.060573	0	0	0	560
1.0029	0.71941	0.81362	0.73001	0.5854	0.7059	0.47931	1.0024	0.72557	0.65136	0.57924	0.49993	0.49539	0.44513	0.32644	NaN	NaN	NaN	NaN	0.68734	0.82341	0.44751	0.4692	0.62118	0.68528	0.66037	0.84232	NaN	0.76411	0.32995	0.27321	0.35666	NaN	NaN	0.16132	NaN	S	3			0.999942	0.00066201	213.63	176.47	170.48	-0.03037	774590000	582650000	191940000	561
NaN	NaN	NaN	0.6621	0.60488	NaN	NaN	NaN	0.48971	NaN	NaN	0.15707	NaN	NaN	NaN	NaN	NaN	NaN	NaN	NaN	NaN	NaN	NaN	NaN	NaN	NaN	NaN	NaN	NaN	NaN	NaN	NaN	NaN	NaN	NaN	NaN	S	3			0.5	2.03564e-11	197.3	125.98	197.3	-0.1894	52386000	35698000	16688000	134
NaN	NaN	NaN	NaN	NaN	NaN	NaN	NaN	NaN	NaN	NaN	NaN	NaN	NaN	NaN	NaN	NaN	NaN	NaN	NaN	NaN	NaN	NaN	NaN	NaN	NaN	NaN	NaN	NaN	NaN	NaN	NaN	NaN	NaN	NaN	NaN	S	3			0.98995	1.16391e-05	89.891	59.24	89.891	-0.48417	17837000	11101000	6735700	566
NaN	NaN	NaN	NaN	NaN	0.82464	0.77402	0.81572	NaN	NaN	0.50797	NaN	NaN	NaN	NaN	NaN	NaN	NaN	1.0664	0.95191	NaN	NaN	NaN	NaN	NaN	NaN	NaN	NaN	NaN	NaN	NaN	NaN	NaN	NaN	NaN	NaN	S	3			0.994115	0.000510619	194.3	150.25	126.56	0.22821	51667000	36612000	15055000	1320
NaN	NaN	NaN	0.68804	NaN	NaN	NaN	NaN	0.67639	0.44804	NaN	NaN	NaN	NaN	NaN	NaN	NaN	NaN	NaN	NaN	NaN	NaN	NaN	NaN	NaN	NaN	NaN	NaN	NaN	NaN	NaN	NaN	NaN	NaN	NaN	NaN	S	3			0.771237	0.00040842	101.35	50.383	101.35	0.16304	16410000	10663000	5747800	1323
NaN	NaN	NaN	NaN	NaN	NaN	NaN	NaN	NaN	NaN	NaN	NaN	NaN	NaN	NaN	NaN	NaN	NaN	NaN	NaN	NaN	NaN	NaN	NaN	NaN	NaN	NaN	NaN	NaN	NaN	NaN	NaN	NaN	NaN	NaN	NaN	S	3			0.958754	6.7367e-05	189.34	126.98	189.34	2.0164	1665600	1665600	0	1303
NaN	NaN	NaN	NaN	NaN	NaN	NaN	NaN	NaN	NaN	NaN	NaN	NaN	NaN	NaN	NaN	NaN	NaN	NaN	NaN	NaN	NaN	NaN	NaN	NaN	NaN	NaN	NaN	NaN	NaN	NaN	NaN	NaN	NaN	NaN	NaN	S	3			0.333067	0.000326761	128.08	70.908	128.08	1.6013	0	0	0	1306
1.1231	0.62477	0.90012	0.64897	0.72477	0.72304	0.7042	0.8876	0.83704	0.66988	0.56566	0.61808	NaN	0.43246	0.38802	NaN	NaN	NaN	0.9248	1.0589	0.84694	0.73928	0.84813	NaN	NaN	NaN	NaN	NaN	NaN	NaN	1.8855	NaN	NaN	NaN	NaN	NaN	S	3			1	6.27121e-06	91.889	52.064	77.169	-0.75049	310550000	187150000	123410000	210
NaN	NaN	NaN	NaN	NaN	NaN	NaN	NaN	NaN	NaN	NaN	NaN	NaN	NaN	NaN	NaN	NaN	NaN	NaN	NaN	NaN	NaN	NaN	NaN	NaN	NaN	NaN	NaN	NaN	NaN	NaN	NaN	NaN	NaN	NaN	NaN	S	3			0.317762	0.00293189	82.85	38.425	82.85	-0.80599	0	0	0	86
NaN	NaN	NaN	NaN	NaN	NaN	NaN	NaN	NaN	NaN	NaN	NaN	NaN	NaN	NaN	NaN	NaN	NaN	NaN	NaN	NaN	NaN	NaN	NaN	NaN	NaN	NaN	NaN	NaN	NaN	NaN	NaN	NaN	NaN	NaN	NaN	S	3			0.317762	0.00293189	82.85	38.425	82.85	-0.80599	0	0	0	88
NaN	NaN	NaN	NaN	NaN	NaN	NaN	NaN	NaN	NaN	NaN	0.60439	NaN	NaN	NaN	NaN	NaN	0.31924	NaN	NaN	NaN	NaN	NaN	NaN	NaN	NaN	NaN	NaN	NaN	NaN	NaN	NaN	NaN	NaN	NaN	NaN	S	3			0.862537	1.19014e-05	75.91	58.489	41.047	0.32606	138260000	89280000	48979000	492
1.1307	0.59204	0.55652	0.55854	0.54082	0.50424	0.42389	0.52217	0.56421	0.58069	0.50548	0.4663	0.49953	0.45187	0.43347	0.24485	NaN	NaN	1.235	0.73615	0.71399	0.65124	0.36524	0.43679	0.46476	0.49067	0.51993	NaN	0.77736	0.51973	0.60382	0.39218	0.50955	0.53447	0.47245	0.40819	S	3			1	0.00030049	148.06	106.95	144.33	0.16082	487830000	302040000	185780000	312
0.99334	0.75226	0.74288	0.68202	0.81422	0.82381	0.84665	0.81463	0.85096	0.96782	0.6973	0.5035	0.82654	0.65875	0.79498	0.91957	0.32036	0.63039	1.0851	0.71942	0.9826	0.65566	0.37545	0.39883	0.7624	0.73559	0.77202	0.6631	0.774	0.75035	0.30461	0.70513	0.57623	0.27647	0.653	0.33269	S	3			1	9.65324e-54	314.11	266.89	244.27	-0.10305	19765000000	11463000000	8302000000	799
1.0406	0.94521	0.82802	0.88421	0.98654	0.95615	0.74545	1.2257	1.1031	0.61684	0.89049	0.89286	0.82352	1.0408	0.84961	0.7248	0.82715	0.79629	1.0336	1.0616	0.78485	0.88386	0.89214	0.94912	0.84628	0.80842	0.87383	0.86165	0.99019	0.86289	1.0221	0.71927	0.84197	0.83514	0.86742	0.77925	S	3			0.999993	4.32815e-16	136.77	117.38	69.913	0.31895	5297800000	2806500000	2491200000	527
1.1276	0.97745	0.87062	0.88607	1.075	0.87674	0.68428	1.0209	0.85788	0.67589	0.91247	0.8783	0.78026	1.2457	0.89135	0.85374	1.0187	0.79386	1.0264	1.0373	0.78485	0.85366	1.0779	1.0306	1.1074	0.8518	0.80717	0.93248	0.93714	1.1493	1.0624	0.99032	0.81581	0.99588	NaN	1.0292	S	3			0.999999	5.63454e-06	86.727	70.656	73.574	0.036141	1447400000	732240000	715200000	532
0.92496	0.78874	0.64524	0.67986	0.86673	0.87894	0.99793	0.91217	1.0937	0.9588	0.76951	1.0405	0.94042	1.1849	1.0711	1.145	1.1259	1.0244	0.97237	0.95131	1.5518	0.89971	0.89234	0.4568	0.88492	0.82959	0.91039	0.9321	1.1445	1.3756	0.74712	0.80023	0.85118	0.991	1.1601	0.84712	S	3			0.999999	2.18626e-47	488.14	456.67	326.92	0.13938	4653300000	2384700000	2268600000	1163
NaN	NaN	NaN	NaN	NaN	NaN	NaN	NaN	NaN	NaN	NaN	NaN	NaN	NaN	NaN	NaN	NaN	NaN	NaN	NaN	NaN	NaN	0.86778	NaN	NaN	NaN	0.82647	NaN	0.81604	NaN	NaN	0.92922	NaN	0.54156	NaN	0.5827	S	4			0.767726	0.000240843	49.209	33.399	49.209	-0.0066955	63241000	34412000	28829000	69
NaN	NaN	0.6677	NaN	0.9662	NaN	NaN	1.005	NaN	0.38643	NaN	1.1377	0.6019	NaN	NaN	NaN	NaN	NaN	NaN	NaN	NaN	NaN	NaN	NaN	NaN	NaN	NaN	NaN	NaN	NaN	NaN	NaN	NaN	NaN	NaN	NaN	S	3			0.740664	0.00622521	46.461	26.534	44.238	0.40113	97592000	58439000	39153000	654
NaN	NaN	NaN	0.70363	0.60102	0.63024	NaN	NaN	NaN	0.93562	NaN	NaN	NaN	NaN	NaN	NaN	NaN	NaN	NaN	NaN	NaN	NaN	NaN	NaN	NaN	NaN	NaN	NaN	NaN	NaN	NaN	NaN	NaN	NaN	NaN	NaN	S	2			0.926631	0.000673529	79.383	57.47	69.024	0.065133	10976000	7484500	3491500	856
1.1371	0.73818	0.79162	0.50656	NaN	NaN	0.41013	NaN	NaN	NaN	NaN	NaN	NaN	NaN	NaN	NaN	NaN	NaN	0.90033	NaN	0.51036	0.53858	0.96362	0.53874	NaN	0.60942	NaN	NaN	NaN	NaN	0.43366	NaN	NaN	NaN	NaN	NaN	S	2			0.999993	7.0028e-05	110.38	68.933	106.62	0.86804	67440000	41798000	25642000	398
1.0368	0.79584	0.75477	0.79243	0.78233	0.78503	0.63495	0.95111	0.75566	0.46752	0.57973	0.44187	0.25887	0.26964	0.22729	0.17367	0.17751	0.15157	1.0893	0.75364	0.54203	0.7771	0.86831	NaN	NaN	NaN	0.78496	NaN	NaN	NaN	0.81496	NaN	NaN	NaN	NaN	NaN	S	2			0.999848	4.0991e-05	106.3	71	78.69	1.9569	542910000	320170000	222750000	92
NaN	NaN	NaN	NaN	NaN	NaN	NaN	NaN	NaN	NaN	NaN	NaN	NaN	NaN	NaN	NaN	NaN	NaN	NaN	NaN	0.83768	0.39786	NaN	NaN	NaN	NaN	NaN	NaN	NaN	NaN	NaN	NaN	NaN	NaN	0.58195	0.42802	S	3			0.999999	0.000359891	117.07	69.846	117.07	0.038158	19548000	13671000	5876400	22
NaN	NaN	NaN	NaN	NaN	NaN	NaN	NaN	NaN	NaN	NaN	NaN	NaN	NaN	NaN	NaN	NaN	NaN	NaN	NaN	NaN	NaN	NaN	NaN	NaN	NaN	NaN	NaN	NaN	NaN	NaN	NaN	NaN	NaN	NaN	NaN	S	3			0.304597	2.76248e-05	67.478	55.463	67.478	-0.3554	0	0	0	1732
NaN	NaN	NaN	NaN	NaN	NaN	NaN	NaN	NaN	NaN	NaN	NaN	NaN	NaN	NaN	NaN	NaN	NaN	NaN	NaN	NaN	NaN	NaN	NaN	NaN	NaN	NaN	NaN	NaN	NaN	NaN	NaN	NaN	NaN	NaN	NaN	S	3			0.312918	5.92242e-06	87.808	60.285	87.808	1.0404	0	0	0	1733
NaN	NaN	NaN	NaN	NaN	NaN	NaN	NaN	NaN	NaN	NaN	NaN	NaN	NaN	NaN	NaN	NaN	NaN	NaN	NaN	NaN	NaN	NaN	NaN	NaN	NaN	NaN	NaN	NaN	NaN	NaN	NaN	NaN	NaN	NaN	NaN	S	3			0.268753	0.00394026	42.557	21.951	42.557	0.68641	0	0	0	1740
NaN	NaN	NaN	NaN	NaN	NaN	NaN	NaN	NaN	NaN	NaN	NaN	NaN	NaN	NaN	NaN	NaN	NaN	NaN	NaN	NaN	NaN	NaN	NaN	NaN	NaN	NaN	NaN	NaN	NaN	NaN	NaN	NaN	NaN	NaN	NaN	S	3			0.268753	0.00394026	42.557	21.951	42.557	0.68641	0	0	0	1741
NaN	NaN	NaN	NaN	NaN	NaN	NaN	NaN	NaN	NaN	NaN	NaN	NaN	NaN	NaN	NaN	NaN	NaN	NaN	NaN	NaN	NaN	NaN	NaN	NaN	NaN	NaN	NaN	NaN	NaN	NaN	NaN	NaN	NaN	NaN	NaN	S	3			0.399768	0.00229753	46.862	30.816	46.862	-0.27005	0	0	0	2001
NaN	NaN	NaN	0.99903	NaN	0.90043	0.80039	NaN	0.65167	NaN	NaN	NaN	NaN	NaN	NaN	NaN	NaN	NaN	NaN	NaN	NaN	NaN	NaN	NaN	NaN	NaN	NaN	NaN	NaN	NaN	NaN	NaN	NaN	NaN	NaN	NaN	S	2			0.868633	0.000752728	83.733	54.656	83.733	0.85541	17322000	8987000	8335300	2470
NaN	0.68598	NaN	NaN	NaN	NaN	NaN	NaN	NaN	NaN	0.67591	NaN	0.66934	NaN	NaN	NaN	0.61863	NaN	0.98737	0.7009	NaN	NaN	0.66046	NaN	NaN	NaN	NaN	NaN	NaN	NaN	NaN	NaN	NaN	0.67021	0.82048	0.64271	S	2			0.991446	0.00551606	75.088	28.929	70.089	0.43028	1139900000	717050000	422870000	1549
NaN	NaN	NaN	NaN	0.81294	0.7235	NaN	0.86102	0.75606	NaN	NaN	NaN	NaN	NaN	NaN	NaN	NaN	NaN	NaN	NaN	NaN	NaN	NaN	NaN	NaN	NaN	NaN	NaN	NaN	NaN	NaN	NaN	NaN	NaN	NaN	NaN	S	2			0.980702	0.0031512	79.148	42.629	79.148	-0.053613	350640000	201220000	149420000	1551
1.0115	0.86482	0.82688	NaN	0.8015	0.84408	0.78317	0.95605	0.85712	0.87863	0.76707	0.77835	1.0652	0.81006	0.84814	0.87615	NaN	0.81188	1.0324	0.72724	0.91325	0.71798	NaN	0.66186	0.77679	0.84009	0.78924	0.76072	0.88985	0.88844	0.7565	0.84973	0.72941	0.69331	0.91825	0.7138	S	3			0.999778	0.000131912	254.59	228.53	220.78	0.020599	479310000	255870000	223440000	1308
NaN	NaN	NaN	0.71066	NaN	NaN	NaN	NaN	NaN	NaN	NaN	NaN	NaN	NaN	NaN	NaN	0.69232	NaN	NaN	NaN	NaN	NaN	NaN	NaN	NaN	NaN	NaN	NaN	NaN	NaN	NaN	NaN	NaN	NaN	NaN	NaN	S	3			0.865357	0.000338347	135.38	80.284	117.37	-0.18162	24422000	14203000	10219000	1312
NaN	NaN	NaN	NaN	NaN	NaN	NaN	NaN	NaN	NaN	NaN	NaN	NaN	NaN	NaN	NaN	NaN	NaN	NaN	NaN	NaN	NaN	NaN	NaN	NaN	NaN	NaN	NaN	NaN	NaN	NaN	NaN	NaN	NaN	NaN	NaN	S	3			0.481181	5.26522e-05	71.002	52.987	42.661	-0.25677	0	0	0	612
NaN	NaN	NaN	NaN	NaN	NaN	NaN	NaN	NaN	NaN	NaN	NaN	NaN	NaN	NaN	NaN	NaN	NaN	NaN	NaN	NaN	NaN	NaN	NaN	NaN	NaN	NaN	NaN	NaN	NaN	NaN	NaN	NaN	NaN	NaN	NaN	S	3			0.229543	0.00147906	53.998	22.231	53.998	-0.084124	0	0	0	615
NaN	NaN	NaN	NaN	NaN	NaN	NaN	NaN	NaN	NaN	NaN	NaN	NaN	NaN	NaN	NaN	NaN	NaN	NaN	NaN	NaN	NaN	NaN	NaN	NaN	NaN	NaN	NaN	NaN	NaN	NaN	NaN	NaN	NaN	NaN	NaN	S	3			0.808135	0.000142339	63.268	42.025	63.268	0.40796	14757000	14757000	0	618
NaN	NaN	NaN	NaN	NaN	NaN	NaN	NaN	NaN	NaN	NaN	NaN	NaN	NaN	NaN	NaN	NaN	NaN	NaN	NaN	NaN	NaN	NaN	NaN	1.4486	NaN	1.0949	1.1051	1.1214	0.86561	NaN	NaN	NaN	NaN	NaN	NaN	S	3			0.610587	0.000262084	53.481	26.739	53.481	-0.76447	196660000	81172000	115490000	622
1.115	0.82531	0.66033	NaN	NaN	0.609	0.41262	NaN	NaN	NaN	NaN	NaN	NaN	NaN	NaN	NaN	NaN	NaN	1.2062	0.86225	0.60367	0.72849	0.7127	0.58175	0.55752	NaN	0.29309	0.34119	0.23787	NaN	NaN	NaN	NaN	NaN	NaN	NaN	S	2			0.999918	1.25585e-06	130.47	88.982	115.88	0.63297	236410000	155860000	80550000	110
1.0088	NaN	0.7689	1.0476	1.2828	NaN	0.53779	NaN	NaN	0.83136	0.87905	NaN	NaN	NaN	NaN	NaN	NaN	0.46497	NaN	NaN	NaN	NaN	NaN	NaN	NaN	NaN	NaN	NaN	NaN	NaN	NaN	NaN	NaN	NaN	NaN	NaN	S	3			0.999999	0.00338447	113.44	78.959	113.44	0.11163	21532000	13746000	7785600	327
NaN	NaN	NaN	NaN	NaN	NaN	NaN	NaN	NaN	NaN	NaN	NaN	NaN	NaN	NaN	NaN	NaN	NaN	NaN	NaN	NaN	NaN	NaN	NaN	NaN	NaN	NaN	NaN	NaN	NaN	NaN	NaN	NaN	NaN	NaN	NaN	S	2			0.71318	0.00116644	89.911	66.793	65.423	-0.071461	13802000	7453700	6347900	162
NaN	NaN	NaN	NaN	NaN	NaN	NaN	NaN	NaN	NaN	NaN	NaN	NaN	NaN	NaN	NaN	NaN	NaN	NaN	NaN	NaN	NaN	NaN	NaN	NaN	NaN	NaN	NaN	NaN	NaN	NaN	NaN	NaN	NaN	NaN	NaN	S	3			0.320741	0.000171391	59.434	45.05	40.323	1.0534	0	0	0	468
0.87882	NaN	NaN	NaN	NaN	NaN	NaN	NaN	NaN	NaN	NaN	NaN	NaN	NaN	NaN	NaN	NaN	NaN	NaN	NaN	NaN	NaN	NaN	NaN	NaN	NaN	NaN	NaN	NaN	NaN	NaN	NaN	NaN	NaN	NaN	NaN	S	3			0.750031	0.000672212	173.76	126.08	173.76	-0.35844	8403800	4893000	3510800	340
1.0214	0.703	0.68663	0.6164	0.72893	0.74945	0.69396	0.92528	0.80623	0.66478	0.6638	0.70784	0.75143	0.82621	0.72642	0.73212	0.58598	0.50203	0.99784	0.76545	0.89702	0.70819	0.73119	0.71242	0.85845	0.70033	0.71016	0.72797	0.86965	0.79639	0.66131	0.72069	0.66215	0.61099	0.66881	0.58262	S	3			1	5.54471e-08	140.68	121	120.59	-0.16171	1452400000	824830000	627580000	350
0.61817	NaN	0.77732	0.73774	0.5024	0.96793	0.77332	NaN	0.63616	0.61542	0.5136	0.65654	0.67415	0.63528	0.87875	0.89313	0.45725	0.52829	NaN	NaN	0.60627	0.54564	0.44567	NaN	NaN	NaN	NaN	0.61093	0.76243	0.95406	0.67383	0.76552	NaN	NaN	0.86359	NaN	S	2			0.991418	0.000145101	117.02	74.674	75.02	0.3442	745850000	448020000	297830000	1265
0.97927	0.82357	0.81296	0.69563	0.73922	0.92129	0.80223	0.80484	0.75953	0.87706	0.74475	0.64205	0.90592	0.75959	0.97709	0.80541	0.4947	0.62286	1.0781	0.87508	0.92527	0.7207	0.55901	0.50912	0.79114	0.752	0.75921	0.88641	NaN	NaN	NaN	NaN	NaN	NaN	NaN	NaN	S	3			1	0.000226547	324.94	324.94	236.77	-0.054882	944670000	538530000	406130000	803
NaN	NaN	NaN	NaN	NaN	NaN	NaN	NaN	NaN	NaN	NaN	NaN	NaN	NaN	NaN	NaN	NaN	NaN	NaN	NaN	NaN	NaN	NaN	NaN	NaN	NaN	NaN	NaN	NaN	NaN	NaN	NaN	NaN	NaN	NaN	NaN	S	2			0.999724	0.00344416	95.5	60.195	95.5	-1.4389	0	0	0	105
NaN	NaN	NaN	NaN	NaN	NaN	NaN	NaN	NaN	NaN	NaN	NaN	NaN	NaN	NaN	NaN	NaN	NaN	NaN	NaN	NaN	NaN	NaN	NaN	NaN	NaN	NaN	NaN	NaN	NaN	NaN	NaN	NaN	NaN	NaN	NaN	S	3			0.391707	0.00444483	46.504	21.35	46.504	-0.42408	0	0	0	83
NaN	NaN	NaN	NaN	NaN	NaN	NaN	NaN	NaN	NaN	NaN	NaN	NaN	NaN	NaN	NaN	NaN	NaN	NaN	NaN	NaN	NaN	NaN	NaN	NaN	NaN	NaN	NaN	NaN	NaN	NaN	NaN	NaN	NaN	NaN	NaN	S	3			0.411478	0.00444483	46.504	21.35	41.294	-0.12522	0	0	0	84
NaN	NaN	NaN	NaN	NaN	NaN	NaN	NaN	NaN	NaN	NaN	NaN	NaN	NaN	NaN	NaN	NaN	NaN	NaN	NaN	NaN	NaN	NaN	NaN	NaN	NaN	NaN	NaN	NaN	NaN	NaN	NaN	NaN	NaN	NaN	NaN	S	3			0.271583	0.00522274	41.69	24.069	41.69	-0.079452	0	0	0	86
0.96473	0.9273	NaN	0.75236	1.1816	NaN	0.81786	NaN	NaN	NaN	NaN	1.3952	1.3916	NaN	1.4528	NaN	NaN	1.2184	0.99805	NaN	NaN	0.85291	0.77234	NaN	NaN	NaN	NaN	NaN	NaN	NaN	NaN	NaN	NaN	NaN	NaN	NaN	S	3			0.677554	8.06844e-05	63.479	51.434	63.479	0.15983	260390000	123550000	136840000	88
NaN	NaN	NaN	NaN	NaN	NaN	NaN	NaN	NaN	NaN	NaN	NaN	NaN	NaN	NaN	NaN	NaN	NaN	NaN	0.90489	NaN	NaN	NaN	NaN	NaN	NaN	NaN	NaN	NaN	NaN	NaN	NaN	NaN	NaN	NaN	NaN	S	3			0.568302	0.00398372	45.666	23.728	44.184	-0.38886	17702000	9228900	8473400	90
1.0365	0.80108	0.71874	0.64698	0.69966	0.77369	0.64955	NaN	0.74585	0.59368	NaN	0.72479	NaN	NaN	0.67057	0.64442	NaN	0.48365	0.67055	0.78556	0.7505	0.6945	0.70737	0.76167	0.72729	0.75611	0.67037	0.65422	0.81942	NaN	0.75609	0.77405	0.66811	0.61934	0.61893	0.6035	S	3			1	1.54592e-08	124.76	102.71	124.76	0.19014	1739600000	923800000	815800000	867
NaN	NaN	NaN	NaN	NaN	NaN	NaN	NaN	NaN	NaN	NaN	NaN	NaN	NaN	NaN	NaN	NaN	NaN	NaN	NaN	NaN	NaN	NaN	NaN	NaN	NaN	NaN	NaN	NaN	NaN	NaN	NaN	NaN	NaN	NaN	NaN	S	2			0.99997	0.00498583	78.95	53.51	78.902	1.7944	4863000	4863000	0	246
NaN	NaN	NaN	NaN	NaN	NaN	NaN	NaN	NaN	NaN	NaN	NaN	NaN	NaN	NaN	NaN	NaN	NaN	NaN	NaN	NaN	NaN	NaN	0.88929	1.0588	0.67021	NaN	NaN	0.88243	NaN	NaN	NaN	0.5516	NaN	0.47325	0.46238	S	2			0.931657	8.67959e-08	123.4	88.911	123.4	0.12037	31312000	19197000	12115000	229
NaN	NaN	NaN	NaN	NaN	NaN	NaN	NaN	NaN	NaN	NaN	NaN	NaN	NaN	NaN	NaN	NaN	NaN	NaN	NaN	NaN	NaN	NaN	NaN	NaN	NaN	NaN	NaN	NaN	NaN	NaN	NaN	0.67348	0.67917	0.74751	NaN	S	3			0.822091	0.000637137	63.681	17.689	42.639	-0.90292	35195000	21216000	13979000	151
NaN	NaN	NaN	NaN	NaN	0.98538	NaN	1.427	0.98387	NaN	NaN	NaN	NaN	NaN	NaN	NaN	NaN	NaN	NaN	NaN	NaN	NaN	NaN	1.0521	NaN	0.7603	0.84128	NaN	NaN	NaN	NaN	NaN	NaN	NaN	NaN	NaN	S	3			0.998523	0.00041064	77.469	47.456	61.942	-0.099674	44295000	28915000	15380000	148
0.96288	1.1657	1.1039	0.94475	1.0467	1.1982	1.5431	1.0396	1.2772	2.073	1.1839	0.7633	1.4977	0.6853	1.0747	1.5682	0.67252	1.1563	1.0192	1.0185	3.7255	1.3201	0.90775	1.0275	1.304	1.2667	1.2666	0.91908	1.2253	1.6668	0.73553	1.0714	0.75634	0.69055	1.172	0.93068	S	4			0.999989	0.000109814	130.02	109.02	113.23	0.10391	4156200000	1846000000	2310100000	120
0.83116	0.60427	0.5463	0.53081	0.4541	0.48816	0.44282	0.52744	0.46743	0.38942	0.39472	0.31724	0.38901	0.25293	0.27224	0.18333	0.096786	0.16795	1.0045	0.55754	0.43191	0.40359	0.36811	0.34864	0.42587	0.37439	0.40506	0.3913	0.47832	0.36648	0.24455	0.24683	0.23133	0.13276	0.19038	0.12303	S	3			1	3.39093e-69	402.3	344.22	346.46	0.40802	18694000000	12348000000	6346800000	181
0.9436	0.67891	0.65718	0.62125	0.72804	0.68181	0.5687	0.88131	0.73759	0.58813	0.63943	0.57806	0.716	0.77352	0.69153	0.67542	0.56189	0.62683	0.95549	0.70801	0.57232	0.62551	0.63683	0.61086	0.7074	0.68354	0.66536	0.64212	0.82298	0.61287	0.70373	0.6912	0.6696	0.60691	0.69766	0.68323	S	3			1	1.78188e-26	364.95	331.86	238.88	-0.13239	15079000000	8391700000	6686800000	188
1.0424	0.7287	0.69771	0.74413	0.76638	0.72929	0.6321	1.0284	0.85133	0.65709	0.67735	0.73505	0.63399	0.88704	0.66476	0.56668	0.67578	0.64383	1.1484	0.87976	0.83713	0.64404	0.74461	0.87304	0.78032	0.75946	0.64096	0.72179	0.76062	0.61039	0.72196	0.64384	0.63723	0.6085	0.60787	0.72876	S	3			1	2.12885e-05	284.91	188.23	109.83	-0.25115	765340000	438790000	326550000	193
NaN	NaN	NaN	NaN	NaN	NaN	NaN	NaN	NaN	NaN	NaN	NaN	NaN	NaN	NaN	NaN	NaN	NaN	NaN	NaN	NaN	NaN	NaN	NaN	NaN	NaN	NaN	NaN	NaN	NaN	NaN	NaN	NaN	NaN	NaN	NaN	S	3			1	0.00197325	263.44	197.98	157.37	-0.32143	8798700	0	8798700	9
NaN	0.76103	0.45112	0.61593	0.66795	0.59284	0.68522	0.61929	0.6318	0.69329	0.60724	0.83271	1.0708	1.0679	0.84038	1.1164	0.91921	0.89997	1.164	0.72037	1.1325	0.53533	0.60011	0.35863	0.6425	0.43339	0.49527	0.59325	0.56463	0.83491	0.52694	0.55467	0.31252	0.60724	0.58671	0.69317	S	3			0.999995	0.000365456	308	250.82	262.24	-0.24067	603410000	348960000	254450000	305
0.9443	0.74491	0.90842	0.68602	0.62399	0.60952	0.7014	0.61929	0.6318	0.57463	0.79605	1.3273	1.0708	1.0679	1.1627	1.2846	1.3283	0.89997	1.0963	0.76387	0.8519	0.58146	0.80346	0.81546	0.75633	0.57456	0.49527	0.78208	0.49188	0.72753	0.93466	0.8077	1.0726	1.0165	1.0624	1.0576	S	3			0.999953	7.27298e-05	308	250.82	255.16	-0.20435	852100000	474530000	377570000	307
1.3832	NaN	0.63366	NaN	NaN	NaN	NaN	NaN	0.89921	0.52457	NaN	1.1568	NaN	NaN	1.4591	NaN	1.0435	NaN	NaN	NaN	NaN	NaN	NaN	NaN	NaN	NaN	NaN	0.59325	NaN	1.0673	NaN	NaN	NaN	NaN	NaN	NaN	S	3			0.965205	0.00237245	229.92	159.83	104.43	-0.37636	94944000	47628000	47316000	310
0.92727	1.0119	0.93099	0.61305	0.84559	0.70189	0.74127	0.76591	0.689	0.67096	0.83832	0.64244	0.84897	0.62355	0.69974	0.77247	0.42677	0.51898	1.1463	0.81506	0.56911	0.75693	0.84931	0.63297	0.6699	0.71443	0.67951	0.70439	0.8766	0.67158	0.65277	0.69063	0.64905	0.63418	0.68276	0.5889	S	3			1	5.19279e-12	141.87	115.88	71.853	-0.12362	694230000	388570000	305660000	22
NaN	0.63747	NaN	NaN	NaN	NaN	NaN	NaN	NaN	0.76078	NaN	NaN	NaN	NaN	NaN	0.75991	NaN	NaN	NaN	NaN	NaN	NaN	NaN	0.83823	NaN	0.65011	NaN	NaN	0.57707	0.79552	0.88198	NaN	0.68091	0.51403	0.57549	0.59931	S	2			0.999992	5.38229e-12	152.03	124.69	149.64	-0.2916	29673000	18705000	10968000	425
0.91513	0.67189	0.63461	0.59656	0.65227	0.65348	0.57379	0.77164	0.67036	0.50484	0.50081	0.3799	0.25766	0.23794	0.16712	0.1218	0.12707	0.096591	0.97851	0.76554	0.70004	0.64076	0.70888	0.66635	0.62832	0.58029	0.55564	0.55018	0.63151	0.36503	0.34033	0.24183	0.19799	0.16392	0.12972	0.13972	S	3			1	3.66326e-07	251.98	188.16	237.44	-0.015067	5084000000	3267600000	1816400000	532
NaN	NaN	NaN	NaN	NaN	NaN	NaN	NaN	NaN	NaN	NaN	NaN	NaN	NaN	NaN	NaN	NaN	NaN	0.49055	NaN	NaN	NaN	NaN	NaN	NaN	NaN	NaN	NaN	NaN	NaN	NaN	NaN	NaN	NaN	NaN	NaN	S	2			1	0.00107066	91.123	11.109	91.123	-0.34449	67706000	24875000	42831000	825
0.99605	0.22268	NaN	NaN	NaN	NaN	NaN	NaN	NaN	NaN	NaN	NaN	NaN	NaN	NaN	NaN	NaN	NaN	NaN	NaN	NaN	NaN	NaN	NaN	NaN	NaN	NaN	NaN	NaN	NaN	NaN	NaN	NaN	NaN	NaN	NaN	S	2			0.9971	1.72841e-06	130.47	103.21	130.47	-0.365	1037700000	787020000	250650000	867
NaN	NaN	NaN	NaN	NaN	3.8144	NaN	NaN	1.9057	NaN	1.2271	NaN	NaN	NaN	NaN	NaN	NaN	NaN	NaN	NaN	NaN	NaN	NaN	NaN	NaN	NaN	NaN	NaN	NaN	NaN	NaN	NaN	NaN	NaN	NaN	NaN	S	2			0.979999	0.000498903	88.565	52.908	79.416	0.52225	45712000	8222600	37489000	44
NaN	NaN	NaN	NaN	NaN	NaN	NaN	NaN	NaN	NaN	NaN	NaN	NaN	NaN	NaN	NaN	NaN	NaN	NaN	NaN	NaN	NaN	NaN	NaN	NaN	NaN	NaN	NaN	NaN	NaN	NaN	NaN	NaN	NaN	NaN	NaN	S	3			0.489759	0.00160789	117.52	79.92	59.265	-0.32789	0	0	0	47
1.4888	0.54919	1.3727	0.82961	0.60692	0.89888	NaN	0.86286	0.85562	0.49584	1.2204	0.92134	0.7336	0.64136	0.58486	NaN	0.28244	NaN	NaN	1.2527	NaN	NaN	0.62827	0.49064	NaN	0.47986	0.62655	NaN	NaN	NaN	0.70669	0.39313	0.38774	0.52438	0.33958	NaN	S	2			0.995413	5.18219e-08	140.4	102.02	140.4	-0.71736	410610000	202940000	207680000	49
NaN	NaN	NaN	NaN	NaN	NaN	NaN	NaN	NaN	NaN	NaN	NaN	NaN	NaN	NaN	NaN	NaN	NaN	NaN	NaN	NaN	NaN	NaN	NaN	NaN	NaN	NaN	NaN	NaN	NaN	NaN	NaN	NaN	NaN	NaN	NaN	S	3			0.997105	0.000315832	250.92	182.34	210.08	0.27672	21582000	21582000	0	668
1.0836	NaN	0.23641	0.19266	NaN	NaN	0.10547	NaN	NaN	NaN	NaN	NaN	NaN	NaN	NaN	NaN	NaN	NaN	NaN	NaN	NaN	NaN	NaN	NaN	NaN	NaN	NaN	NaN	NaN	NaN	NaN	NaN	NaN	NaN	NaN	NaN	S	3			0.999917	2.57831e-06	257.04	221.01	222.55	-0.0069848	79511000	57656000	21855000	670
NaN	NaN	NaN	NaN	NaN	NaN	NaN	NaN	NaN	NaN	NaN	NaN	NaN	NaN	NaN	NaN	NaN	NaN	NaN	NaN	NaN	NaN	NaN	NaN	NaN	NaN	NaN	0.50514	NaN	NaN	NaN	NaN	NaN	NaN	NaN	NaN	S	3			0.562728	0.000438501	89.913	68.965	85.496	0.093241	17102000	10595000	6506100	1216
NaN	NaN	NaN	NaN	NaN	NaN	NaN	0.65664	0.58527	NaN	0.39378	NaN	NaN	NaN	NaN	NaN	NaN	NaN	1.1439	NaN	0.71722	0.52093	0.50997	NaN	NaN	NaN	NaN	NaN	NaN	NaN	NaN	NaN	NaN	NaN	NaN	NaN	S	3			0.863954	1.93287e-05	98.062	75.866	80.596	-0.10879	159060000	98661000	60399000	1219
NaN	NaN	NaN	NaN	NaN	NaN	NaN	NaN	NaN	NaN	NaN	NaN	NaN	NaN	NaN	NaN	NaN	NaN	NaN	NaN	NaN	1.1034	NaN	NaN	NaN	NaN	NaN	NaN	NaN	NaN	NaN	NaN	NaN	NaN	NaN	NaN	S	2			0.663125	4.3077e-05	83.317	50.078	83.317	-0.16691	17343000	9482500	7860200	1222
0.96676	0.92361	0.81435	0.72197	0.83958	1.0109	0.97002	1.265	1.1448	0.97789	0.97437	1.0829	0.95095	1.1133	0.90424	0.77577	0.68509	0.5197	1.0726	1.1317	1.0593	0.91824	1.0548	0.88705	1.0561	0.99155	0.83836	0.90117	1.143	0.76573	0.9917	0.89501	0.80652	0.75291	0.81718	0.7081	S	3			1	1.4763e-49	202.79	169.13	161.75	-0.17391	6126300000	3287400000	2838800000	1225
NaN	NaN	NaN	NaN	NaN	NaN	NaN	NaN	NaN	NaN	NaN	NaN	NaN	NaN	NaN	NaN	NaN	NaN	1.0056	0.59384	0.73769	0.44986	NaN	NaN	NaN	NaN	NaN	0.36428	0.5582	NaN	NaN	NaN	NaN	NaN	NaN	NaN	S	3			0.958171	0.000487898	76.301	47.172	76.301	0.18491	32992000	20713000	12279000	1013
NaN	NaN	NaN	NaN	NaN	NaN	NaN	NaN	NaN	NaN	NaN	NaN	NaN	NaN	NaN	NaN	NaN	NaN	NaN	NaN	NaN	NaN	NaN	NaN	NaN	NaN	NaN	0.36428	0.5582	NaN	NaN	0.43568	NaN	NaN	NaN	NaN	S	3			0.740297	0.000487898	76.301	47.172	54.225	-0.21284	12103000	8603900	3498700	1016
1.0178	NaN	NaN	0.49002	NaN	NaN	NaN	0.31503	0.21265	0.25377	0.15666	NaN	NaN	NaN	NaN	NaN	NaN	NaN	NaN	0.65584	1.1114	NaN	0.17952	0.13808	0.37083	NaN	0.22498	NaN	0.21726	NaN	NaN	NaN	NaN	NaN	NaN	NaN	S	4			0.919399	0.000391861	63.913	51.3	58.373	-0.14043	778940000	495280000	283660000	1178
0.96551	0.68365	NaN	0.48892	0.37419	NaN	0.30641	0.31503	0.2259	0.25377	0.15666	NaN	NaN	NaN	NaN	NaN	NaN	NaN	1.0188	0.71298	1.1114	0.48834	0.42893	0.31681	0.37083	0.26801	0.22498	NaN	0.21726	NaN	NaN	NaN	NaN	NaN	NaN	NaN	S	3			1	0.000391861	195.6	156.04	145.94	0.36331	1371500000	930310000	441190000	1186
0.76222	NaN	NaN	NaN	NaN	NaN	NaN	NaN	NaN	0.64451	NaN	NaN	0.61199	NaN	NaN	NaN	NaN	NaN	NaN	NaN	NaN	NaN	NaN	0.58127	0.67491	0.6198	0.62782	0.47753	0.66145	0.45994	0.58099	0.41208	0.457	0.28127	0.37107	0.31557	S	2			1	2.57911e-15	163.41	101.32	103.88	0.60678	801130000	319930000	481190000	1038
NaN	NaN	NaN	NaN	NaN	NaN	NaN	NaN	NaN	NaN	NaN	NaN	NaN	NaN	NaN	NaN	NaN	NaN	NaN	NaN	NaN	NaN	NaN	NaN	NaN	NaN	NaN	NaN	NaN	NaN	NaN	NaN	NaN	NaN	NaN	0.99293	S	2			0.633958	0.000214188	93.181	54.782	93.181	-0.096259	4128900	1910300	2218600	812
1.205	NaN	NaN	NaN	0.75346	NaN	0.57992	0.81753	0.8463	0.5344	NaN	NaN	0.97728	1.2981	1.1502	0.98698	0.93859	1.0231	1.0522	0.75652	NaN	0.7003	0.56447	0.6829	NaN	NaN	NaN	NaN	NaN	0.67555	NaN	NaN	0.91707	0.93126	1.0872	NaN	S	2			0.996175	5.97884e-06	118.55	86.825	91.14	0.10198	114850000	57696000	57159000	815
1.0679	0.094532	NaN	NaN	NaN	NaN	NaN	NaN	NaN	NaN	NaN	NaN	NaN	NaN	NaN	NaN	NaN	NaN	1.0799	0.31498	NaN	NaN	NaN	NaN	NaN	NaN	NaN	NaN	NaN	NaN	NaN	NaN	NaN	NaN	NaN	NaN	S	3			1	3.84996e-05	263.07	178.38	179.6	-0.40711	487790000	383410000	104380000	1001
NaN	NaN	NaN	NaN	NaN	NaN	NaN	NaN	NaN	NaN	NaN	NaN	NaN	NaN	NaN	NaN	NaN	NaN	NaN	NaN	NaN	NaN	NaN	NaN	NaN	NaN	NaN	NaN	NaN	NaN	NaN	NaN	NaN	NaN	NaN	NaN	S	3			0.438266	0.00183899	44.081	29.656	44.081	0.4249	0	0	0	1136
NaN	NaN	NaN	NaN	NaN	NaN	NaN	NaN	NaN	NaN	NaN	NaN	NaN	NaN	NaN	NaN	NaN	NaN	NaN	NaN	NaN	NaN	NaN	NaN	NaN	NaN	NaN	NaN	NaN	NaN	NaN	NaN	NaN	NaN	NaN	NaN	S	3			0.805277	2.44361e-09	79.782	67.308	79.782	-0.093774	7569500	0	7569500	1139
NaN	NaN	NaN	NaN	NaN	NaN	NaN	NaN	NaN	NaN	NaN	NaN	NaN	NaN	NaN	NaN	NaN	NaN	NaN	NaN	NaN	NaN	NaN	NaN	NaN	NaN	NaN	NaN	NaN	NaN	NaN	NaN	NaN	NaN	NaN	NaN	S	3			1	0.000108196	262.24	215.67	196.27	-0.37299	5819100	0	5819100	941
NaN	0.91721	NaN	NaN	NaN	0.9618	NaN	0.76699	NaN	NaN	NaN	NaN	NaN	NaN	NaN	NaN	NaN	NaN	NaN	NaN	0.6804	0.6593	0.58985	NaN	0.77132	NaN	NaN	0.51474	NaN	NaN	NaN	NaN	NaN	NaN	NaN	NaN	S	3			0.99992	1.29947e-05	89.859	51.081	76.329	0.62089	165110000	125400000	39709000	1228
NaN	0.74369	0.41199	0.69061	0.66473	0.39852	0.44353	NaN	0.49944	0.31687	NaN	0.33567	NaN	NaN	NaN	NaN	NaN	NaN	NaN	NaN	NaN	NaN	NaN	NaN	NaN	NaN	NaN	NaN	NaN	NaN	NaN	NaN	NaN	NaN	NaN	NaN	S	3			1	0.00368022	133.75	89.806	133.75	-0.54802	42948000	32205000	10743000	158
NaN	NaN	NaN	0.64573	0.79925	0.71012	0.85743	0.85767	NaN	0.80415	NaN	NaN	NaN	0.73648	NaN	0.5748	NaN	NaN	NaN	0.6337	NaN	NaN	0.591	NaN	NaN	NaN	0.77212	NaN	NaN	NaN	NaN	NaN	NaN	NaN	NaN	0.3446	S	4			0.994033	0.00115501	151.22	122.32	151.22	0.58947	89443000	58939000	30505000	162
NaN	0.74369	0.41199	0.69061	0.66473	0.39852	0.44353	NaN	NaN	0.80415	0.72664	NaN	NaN	NaN	NaN	NaN	NaN	NaN	NaN	NaN	NaN	NaN	NaN	NaN	NaN	NaN	NaN	NaN	NaN	NaN	NaN	NaN	NaN	NaN	NaN	NaN	S	3			0.987485	0.00136484	133.81	86.378	119.45	-0.28818	50848000	35888000	14960000	164
NaN	NaN	NaN	NaN	NaN	NaN	NaN	NaN	NaN	NaN	NaN	NaN	NaN	NaN	NaN	NaN	NaN	NaN	NaN	NaN	NaN	NaN	NaN	NaN	NaN	NaN	NaN	NaN	NaN	NaN	NaN	NaN	NaN	NaN	NaN	NaN	S	3			0.481088	0.000110859	70.316	33.653	41.431	1.7727	0	0	0	56
NaN	NaN	NaN	NaN	NaN	NaN	NaN	NaN	NaN	NaN	NaN	NaN	NaN	NaN	NaN	NaN	NaN	NaN	NaN	NaN	NaN	NaN	NaN	NaN	NaN	NaN	NaN	NaN	NaN	NaN	NaN	NaN	NaN	NaN	NaN	NaN	S	3			0.544192	0.000110859	70.316	33.653	57.316	0.44394	8960200	0	8960200	57
0.94616	0.75518	1.209	0.45316	0.54462	0.88346	0.55223	0.85557	0.7927	0.59006	0.55417	0.83055	0.82275	0.80132	NaN	0.57481	NaN	0.43171	0.67687	0.6694	0.66489	0.564	0.68244	0.55337	NaN	0.67701	0.79399	0.63542	0.75655	0.59148	0.67256	NaN	0.58052	NaN	0.73782	0.67579	S	3			1	1.03936e-06	280.97	234.07	258.12	0.22621	239070000	141120000	97949000	506
NaN	NaN	NaN	NaN	NaN	NaN	NaN	NaN	NaN	NaN	NaN	NaN	NaN	NaN	NaN	NaN	NaN	NaN	NaN	NaN	NaN	NaN	NaN	NaN	NaN	NaN	NaN	0.58018	NaN	NaN	NaN	NaN	NaN	NaN	NaN	NaN	S	3			0.734328	5.0601e-08	99.846	79.595	56.404	0.14651	6637400	3653900	2983500	118
NaN	NaN	NaN	NaN	NaN	NaN	NaN	NaN	NaN	NaN	NaN	NaN	NaN	NaN	NaN	NaN	NaN	NaN	NaN	NaN	NaN	1.0542	0.96206	NaN	NaN	NaN	NaN	NaN	0.85735	0.73857	0.85958	1.1559	1.1197	1.3392	0.9776	0.67523	S	3			1	0.000440869	160.77	129.11	160.77	0.04877	50776000	25435000	25341000	169
1.1628	0.78704	0.60712	0.6822	0.63704	0.73255	NaN	NaN	NaN	0.47109	0.43941	0.3302	NaN	0.32729	NaN	NaN	0.11181	NaN	NaN	NaN	NaN	NaN	NaN	NaN	NaN	NaN	NaN	NaN	0.94935	0.48558	0.7548	NaN	NaN	NaN	0.79624	0.80798	S	2			0.993529	4.05674e-15	159.41	159.41	114.31	0.54847	151350000	86495000	64859000	158
0.93101	0.86297	0.86021	0.70429	NaN	0.7921	0.59193	1.0529	0.81648	NaN	0.8062	NaN	0.96035	1.162	1.1844	0.81925	1.1939	0.93615	0.89756	0.74796	0.49402	0.64872	0.87421	0.83591	NaN	0.66468	NaN	0.7142	1.0404	NaN	1.1482	0.97691	1.0236	NaN	1.1797	NaN	S	2			0.991233	4.62063e-30	184.51	153.62	139.21	0.14596	648980000	324420000	324560000	159
1.1698	0.68438	1.0864	NaN	0.44685	0.72778	NaN	0.76787	NaN	1.0316	0.41841	NaN	0.66472	NaN	0.63685	0.78989	NaN	0.7284	0.89644	NaN	1.1017	0.51327	NaN	NaN	NaN	NaN	0.72315	NaN	NaN	0.45136	0.31626	NaN	1.063	NaN	1.1754	NaN	S	3			0.999989	2.81713e-15	269.38	205.57	257.54	-0.36802	122750000	68153000	54594000	160
NaN	NaN	NaN	0.7645	NaN	NaN	NaN	NaN	NaN	NaN	NaN	NaN	NaN	1.2276	NaN	NaN	NaN	0.31947	1.2933	NaN	NaN	NaN	NaN	NaN	NaN	NaN	NaN	NaN	NaN	NaN	NaN	NaN	NaN	NaN	NaN	NaN	S	2			0.888429	0.000138759	89.663	61.028	89.663	-0.16156	76079000	37325000	38754000	204
1.0645	0.82936	0.61705	NaN	1.1707	0.84356	0.83701	1.2495	1.0342	0.90085	0.92054	NaN	0.88811	NaN	0.89445	0.57473	0.67512	NaN	NaN	0.97703	1.0497	0.95846	1.1983	1.3031	NaN	0.84199	0.97887	0.96353	1.0243	0.72204	1.3991	0.76309	0.81298	1.0353	0.65194	0.72968	S	2			0.996943	7.90276e-09	143.4	90.976	143.4	-0.0015927	582950000	304090000	278850000	206
0.89225	0.65879	0.99374	0.60151	0.73411	0.73155	NaN	NaN	0.71081	NaN	0.55287	0.43555	0.35731	NaN	NaN	NaN	NaN	NaN	1.052	NaN	0.71271	0.70532	0.63733	NaN	NaN	NaN	NaN	0.56633	NaN	NaN	0.35281	0.31305	NaN	NaN	NaN	NaN	S	2			0.999995	1.48741e-17	149.47	112.29	149.47	-0.081131	355380000	216170000	139210000	133
0.77126	NaN	NaN	NaN	NaN	NaN	NaN	NaN	NaN	NaN	NaN	NaN	NaN	NaN	NaN	NaN	NaN	NaN	NaN	NaN	NaN	NaN	NaN	NaN	NaN	NaN	NaN	NaN	NaN	NaN	NaN	NaN	NaN	NaN	NaN	NaN	S	2			0.824207	0.000450033	98.804	68.628	50.232	-0.23152	15750000	10039000	5710400	204
NaN	NaN	NaN	NaN	NaN	NaN	NaN	0.69139	NaN	NaN	0.552	0.69048	0.69755	0.55796	0.69285	NaN	NaN	0.69162	NaN	NaN	NaN	NaN	NaN	NaN	NaN	NaN	NaN	NaN	NaN	NaN	0.50549	NaN	NaN	NaN	NaN	NaN	S	2			0.83015	9.19702e-11	144.74	111.59	144.74	-0.50689	162380000	104570000	57811000	206
0.92897	NaN	0.90759	0.53517	0.66797	0.58659	0.546	NaN	0.77391	NaN	NaN	NaN	NaN	NaN	NaN	NaN	NaN	NaN	1.0112	0.64676	NaN	NaN	NaN	0.94034	0.38269	0.61838	0.55024	0.60708	0.8723	NaN	0.7147	0.53881	NaN	0.53852	0.46187	0.66469	S	2			0.988477	1.86991e-08	142.84	113.49	100.39	-0.30064	501330000	314850000	186480000	208
0.92501	0.6506	1.0054	0.71916	0.71485	0.84217	0.54703	0.93507	0.84221	0.48108	0.73029	0.7617	0.7272	0.96948	0.64105	0.56522	0.68764	0.40013	0.89627	0.69456	0.69693	0.51317	0.63959	0.59668	0.71613	0.63252	0.5591	0.60114	0.73615	0.54807	0.83426	0.79027	0.62749	0.6839	0.73257	0.63512	S	3			1	4.62693e-84	259.35	225.99	259.35	-0.13955	6028900000	3430900000	2598000000	210
0.87764	0.74131	0.63705	0.64069	0.68724	0.85212	NaN	0.73322	0.76838	0.51935	0.68545	0.50683	0.61839	0.64773	0.89607	0.62393	0.33329	0.61311	1.1383	0.59525	0.72941	0.54688	0.32061	NaN	NaN	0.69304	NaN	0.62158	0.83086	0.63246	NaN	0.66851	NaN	0.42957	0.60064	0.5244	S	3			0.999633	0.00332051	259.35	212.99	213.18	0.10893	1359700000	813540000	546140000	219
NaN	0.51841	NaN	NaN	0.50988	NaN	0.78095	NaN	NaN	NaN	NaN	NaN	NaN	NaN	NaN	NaN	NaN	NaN	NaN	0.68073	NaN	NaN	NaN	0.47981	0.7177	NaN	0.68233	NaN	NaN	NaN	0.47616	NaN	NaN	NaN	NaN	NaN	S	2			0.963537	0.00109636	174.59	139.26	85.163	0.10111	182000000	103570000	78427000	221
NaN	0.74883	0.59418	0.73033	0.72948	0.6875	0.64204	0.73147	0.67907	0.60908	0.49877	0.46813	0.41432	0.30231	0.21101	0.2289	NaN	NaN	NaN	0.64629	0.5838	0.74248	0.60074	NaN	0.70176	NaN	0.53928	0.58259	NaN	NaN	0.41974	0.32789	0.2739	0.21442	0.17168	0.23683	S	3			1	4.71394e-07	91.64	66.556	86.959	-0.14309	345780000	238760000	107030000	1267
0.84052	0.74197	0.73755	0.68583	0.74721	0.82694	0.69339	0.91516	0.96106	0.95397	0.68157	0.77336	0.62296	0.67564	0.56031	0.55312	0.42704	0.33595	0.95425	0.91803	0.90984	0.66883	0.75497	0.76186	1.2834	0.84175	0.89525	0.81676	0.94231	0.70229	0.81358	0.65885	0.56875	0.47106	0.59288	0.44472	S	4			1	0.000219754	154.1	130.7	154.1	0.17707	1499600000	852080000	647550000	1768
NaN	NaN	NaN	0.47095	NaN	NaN	0.57047	NaN	NaN	NaN	NaN	0.60047	NaN	NaN	NaN	0.83257	NaN	NaN	NaN	0.68372	NaN	NaN	NaN	NaN	0.71624	0.82626	NaN	0.50808	NaN	NaN	NaN	NaN	NaN	NaN	0.5291	NaN	S	4			0.830571	1.5229e-08	73.269	58.295	53.674	0.19231	97622000	57780000	39843000	569
NaN	NaN	NaN	0.47095	NaN	NaN	0.57047	NaN	NaN	0.60605	NaN	NaN	NaN	NaN	NaN	NaN	NaN	NaN	NaN	0.68372	NaN	NaN	NaN	NaN	NaN	0.82626	NaN	NaN	NaN	NaN	NaN	NaN	NaN	NaN	0.5291	NaN	S	4			0.804723	7.90553e-06	55.999	35.692	49.43	-0.33227	68281000	42451000	25830000	571
NaN	NaN	NaN	0.47095	NaN	NaN	0.57047	NaN	NaN	0.60605	NaN	0.60047	NaN	NaN	NaN	0.83257	NaN	NaN	NaN	0.68372	NaN	NaN	NaN	NaN	0.71624	0.82626	NaN	0.50808	NaN	NaN	NaN	NaN	NaN	NaN	0.5291	NaN	S	4			0.986281	1.5229e-08	73.269	58.295	50.898	0.17915	108650000	65524000	43131000	575
NaN	NaN	NaN	NaN	NaN	NaN	NaN	NaN	NaN	NaN	NaN	NaN	NaN	NaN	NaN	NaN	NaN	NaN	NaN	NaN	NaN	NaN	NaN	NaN	NaN	NaN	NaN	NaN	NaN	NaN	NaN	NaN	NaN	NaN	NaN	NaN	S	2			0.598813	0.000110913	120.6	86.599	112.85	1.127	23882000	16578000	7303200	2627
1.0495	0.63082	0.59038	0.68033	0.69669	0.69683	0.54087	NaN	0.80662	0.58367	0.68897	NaN	NaN	0.81482	0.6998	NaN	0.81473	NaN	1.0218	NaN	0.51542	0.63511	NaN	NaN	0.64147	0.68017	0.73444	0.62883	NaN	NaN	NaN	NaN	NaN	0.66613	0.70502	0.69592	S	2			0.987372	0.0028034	84.916	29.563	83.137	-0.093451	210020000	113680000	96344000	859
NaN	NaN	NaN	NaN	NaN	NaN	NaN	NaN	NaN	NaN	NaN	NaN	NaN	NaN	NaN	NaN	NaN	NaN	1.1804	NaN	0.50734	0.58192	NaN	NaN	NaN	NaN	NaN	NaN	NaN	NaN	NaN	NaN	NaN	NaN	NaN	NaN	S	3			0.893732	0.0043445	93.561	42.77	93.561	0.51057	5012600	2842200	2170500	861
NaN	NaN	NaN	NaN	NaN	NaN	NaN	NaN	NaN	NaN	NaN	NaN	NaN	NaN	NaN	NaN	NaN	NaN	NaN	NaN	0.66924	NaN	NaN	NaN	NaN	0.70572	0.68615	NaN	NaN	NaN	0.82798	NaN	NaN	NaN	NaN	NaN	S	2			0.800361	3.63217e-08	130.1	105.82	130.1	0.37526	127420000	65585000	61830000	2511
1.08	0.75796	0.7032	0.73232	0.76886	0.85327	0.7888	0.95579	0.8408	0.76304	0.73112	0.64456	0.8516	0.694	0.83538	0.8219	0.57736	0.69146	1.0465	0.7334	NaN	0.75523	0.55777	0.62004	0.67068	NaN	NaN	0.72034	0.81272	0.6264	NaN	0.76298	0.68681	0.70827	0.79518	0.67403	S	2			0.998151	3.01678e-21	175.21	149.23	169.58	0.11983	810460000	445340000	365120000	2512
0.99921	0.697	0.73587	0.73775	0.83029	0.8166	0.71997	1.0131	0.9317	0.67648	0.79959	0.78385	0.6959	0.74528	0.68909	0.70763	0.61203	0.63951	0.94637	0.81554	0.70508	0.78717	0.73899	1.195	1.09	1.1836	0.73641	0.78267	0.95048	1.9851	3.3246	2.7389	NaN	0.64694	0.6026	3.6942	S	3			1	1.06744e-06	102.07	82.485	52.866	0.35092	3951100000	2219900000	1731200000	2317
0.99921	0.72993	0.7906	0.43728	0.83029	0.8166	0.71997	1.0131	0.9317	0.67648	0.85397	0.75835	0.72624	0.69739	0.6789	0.66546	0.63126	0.59624	0.94637	0.81554	0.70508	0.78717	0.73899	0.74338	0.78313	0.75798	0.73641	1.2948	1.5428	0.71168	0.74601	0.63677	0.63548	0.64694	0.6026	0.59377	S	3			1	1.06744e-06	102.07	82.485	52.866	0.35092	3944800000	2241600000	1703200000	2321
0.97419	0.75292	0.8711	0.72153	0.83088	0.79093	0.81726	0.9563	0.8156	0.86694	0.75138	0.74656	0.81439	0.77814	0.77484	0.9018	0.56822	0.59849	0.94191	0.77115	0.69066	0.67828	0.58905	NaN	0.81551	0.78095	0.93074	0.8452	1.0591	NaN	NaN	NaN	0.74409	0.54983	1.1041	0.68451	S	2			0.999648	6.66715e-24	175.65	150.75	106.39	-0.12526	495960000	271240000	224710000	758
0.98692	0.89566	0.91991	0.8342	0.79353	0.93821	0.79852	1.228	0.87276	NaN	0.8191	0.61555	0.71575	0.82258	0.56884	0.51887	0.37	0.39868	1.0217	NaN	1.0943	0.53126	0.78527	0.61262	0.89129	0.69294	0.78408	0.83361	0.87455	0.64246	0.53783	0.63335	0.41764	0.32531	0.49851	0.37798	S	3			0.99963	1.0336e-07	91.416	71.591	76.161	-0.20256	2138100000	1268000000	870130000	2359
NaN	NaN	NaN	NaN	NaN	1.1087	NaN	NaN	NaN	NaN	NaN	NaN	NaN	1.0212	0.96439	NaN	NaN	NaN	NaN	NaN	NaN	NaN	NaN	NaN	NaN	NaN	NaN	NaN	NaN	NaN	NaN	NaN	NaN	NaN	NaN	NaN	S	3			0.78838	1.48447e-07	91.276	67.581	91.276	0.58768	40453000	18910000	21543000	2567
NaN	NaN	NaN	NaN	NaN	NaN	NaN	NaN	0.84084	NaN	NaN	NaN	NaN	NaN	NaN	NaN	NaN	NaN	NaN	NaN	NaN	0.81268	0.73028	NaN	NaN	NaN	NaN	NaN	NaN	NaN	NaN	NaN	NaN	NaN	NaN	NaN	S	3			0.789195	1.39056e-07	92.098	70.856	61.345	-0.97751	34147000	16623000	17524000	2569
NaN	NaN	NaN	NaN	NaN	NaN	NaN	NaN	NaN	NaN	NaN	NaN	NaN	NaN	NaN	NaN	NaN	NaN	NaN	NaN	NaN	NaN	NaN	NaN	NaN	NaN	NaN	NaN	NaN	NaN	NaN	NaN	NaN	NaN	NaN	NaN	S	3			0.406094	6.24822e-06	90.464	66.26	85.712	-0.34458	0	0	0	2574
NaN	NaN	NaN	0.8513	NaN	0.97092	NaN	NaN	NaN	NaN	NaN	NaN	1.1072	NaN	NaN	NaN	NaN	NaN	NaN	NaN	NaN	NaN	NaN	NaN	NaN	NaN	NaN	NaN	NaN	NaN	NaN	NaN	NaN	NaN	NaN	NaN	S	3			0.671624	6.21234e-12	123.83	101.89	75.912	-2.3278	30526000	14007000	16518000	2576
NaN	NaN	NaN	NaN	NaN	0.97092	NaN	NaN	NaN	NaN	NaN	0.88958	NaN	NaN	0.96439	NaN	NaN	NaN	0.97968	NaN	NaN	NaN	NaN	NaN	NaN	NaN	NaN	NaN	NaN	NaN	NaN	NaN	NaN	NaN	NaN	NaN	S	3			0.716769	6.21234e-12	123.83	101.89	66.308	-0.77535	40216000	20006000	20210000	2577
1.1408	0.79865	1.0336	0.80039	0.67584	0.74532	0.63819	0.84551	1.2023	0.85509	0.72519	0.82273	0.80061	0.75971	0.55571	0.5716	0.63964	0.78219	1.4847	0.83756	1.217	0.76501	0.88665	0.89205	0.80397	0.85583	0.79533	0.74152	1.0734	0.78244	0.87559	0.69747	0.76117	0.59775	0.67576	0.60718	S	3			1	3.64532e-45	368.23	330.58	188.29	-1.1492	316200000	158670000	157530000	2557
NaN	NaN	NaN	NaN	NaN	NaN	NaN	NaN	NaN	NaN	NaN	NaN	NaN	NaN	NaN	NaN	NaN	NaN	0.90193	NaN	0.85802	NaN	NaN	NaN	NaN	NaN	NaN	NaN	NaN	NaN	NaN	NaN	NaN	NaN	NaN	NaN	S	3			0.652819	3.3841e-06	83.411	68.429	50.029	-0.084281	36388000	19989000	16399000	245
NaN	NaN	NaN	NaN	NaN	NaN	NaN	NaN	NaN	NaN	NaN	NaN	NaN	NaN	NaN	NaN	NaN	NaN	NaN	NaN	NaN	NaN	NaN	NaN	NaN	NaN	NaN	NaN	NaN	NaN	NaN	NaN	NaN	NaN	NaN	NaN	S	4			0.367832	0.0035635	58.723	36.91	58.723	0.071197	0	0	0	959
NaN	NaN	NaN	NaN	NaN	1.3364	NaN	1.2683	NaN	0.96821	1.2395	1.0991	NaN	1.3496	1.2109	1.4258	1.458	NaN	NaN	NaN	1.4936	0.83844	NaN	NaN	NaN	NaN	NaN	NaN	NaN	NaN	NaN	NaN	NaN	NaN	NaN	NaN	S	4			0.973148	0.00289886	58.723	40.708	58.723	-0.14184	95736000	44650000	51086000	962
0.94593	0.60144	0.65265	0.54445	0.45865	NaN	0.63118	0.7408	NaN	0.58589	0.63245	0.34848	NaN	0.52978	NaN	0.59976	0.29066	NaN	1.1025	0.64547	0.69984	0.60647	0.33445	0.35215	0.49754	0.55517	0.60645	NaN	0.6568	0.59484	0.23453	0.44969	0.48579	0.23669	0.44292	0.29119	S	3			1	0.00112508	130.1	101.03	78.342	-0.30128	398270000	252980000	145290000	269
1.0183	NaN	NaN	NaN	NaN	NaN	NaN	NaN	NaN	NaN	NaN	NaN	NaN	NaN	NaN	NaN	NaN	NaN	1.1729	0.84548	0.87798	0.70683	0.80221	0.76967	0.77858	0.70734	0.70316	0.59683	0.7902	0.60331	0.54175	NaN	NaN	NaN	0.23284	NaN	S	3			0.99995	2.38497e-07	111.4	92.805	111.4	-0.17117	422490000	238490000	184000000	1562
NaN	NaN	NaN	NaN	NaN	NaN	NaN	NaN	NaN	NaN	NaN	NaN	NaN	NaN	NaN	NaN	NaN	NaN	NaN	0.62781	0.96634	NaN	NaN	NaN	NaN	NaN	NaN	NaN	NaN	NaN	NaN	NaN	NaN	NaN	NaN	NaN	S	3			0.772963	6.29889e-05	73.771	57.497	73.771	-0.72436	35030000	18274000	16756000	189
NaN	NaN	NaN	NaN	NaN	NaN	NaN	NaN	NaN	NaN	NaN	NaN	NaN	NaN	NaN	NaN	NaN	NaN	NaN	NaN	NaN	NaN	NaN	NaN	NaN	NaN	NaN	NaN	NaN	NaN	NaN	NaN	NaN	NaN	NaN	NaN	S	3			0.490082	0.00341374	62.116	42.162	62.116	1.0709	0	0	0	192
0.95572	NaN	NaN	NaN	0.90268	NaN	NaN	0.7478	NaN	0.70516	NaN	0.4473	NaN	NaN	NaN	NaN	NaN	NaN	1.1611	NaN	NaN	NaN	NaN	NaN	NaN	NaN	NaN	NaN	NaN	NaN	NaN	NaN	NaN	NaN	NaN	NaN	S	3			0.99922	3.01961e-10	108.88	87.957	88.071	-1.5069	230340000	165440000	64902000	197
0.95572	NaN	NaN	NaN	0.90268	NaN	NaN	0.7478	NaN	0.70516	NaN	0.4473	NaN	NaN	NaN	NaN	NaN	NaN	1.1611	0.62781	0.96634	NaN	NaN	NaN	NaN	NaN	NaN	NaN	NaN	NaN	NaN	NaN	NaN	NaN	NaN	NaN	S	3			0.999995	3.01961e-10	108.88	87.957	108.88	-0.29166	272240000	183710000	88526000	201
1.776	NaN	NaN	NaN	NaN	0.96551	NaN	NaN	NaN	NaN	NaN	NaN	NaN	NaN	0.54805	NaN	0.48271	NaN	NaN	NaN	NaN	NaN	NaN	NaN	NaN	NaN	0.89225	NaN	NaN	NaN	NaN	NaN	NaN	0.4179	NaN	NaN	S	3			0.972251	5.84487e-14	120.83	96.935	120.83	1.4274	116850000	81233000	35619000	1635
NaN	NaN	NaN	NaN	NaN	NaN	NaN	NaN	NaN	NaN	NaN	NaN	NaN	NaN	NaN	NaN	NaN	NaN	NaN	NaN	NaN	NaN	NaN	NaN	NaN	NaN	NaN	NaN	NaN	NaN	NaN	NaN	NaN	NaN	NaN	NaN	S	3			0.517995	0.000239012	58.952	33.591	58.952	0.1867	12811000	12811000	0	2248
NaN	0.73538	NaN	NaN	NaN	NaN	NaN	NaN	NaN	NaN	NaN	0.95964	NaN	0.89088	NaN	NaN	NaN	NaN	NaN	NaN	NaN	NaN	NaN	NaN	NaN	NaN	0.75297	NaN	NaN	NaN	0.78193	NaN	NaN	0.60049	0.48741	NaN	S	3			0.679976	8.84166e-08	92.8	70.899	56.453	-0.1654	360040000	203380000	156660000	2250
1.0542	0.76405	0.71927	0.66027	NaN	0.80606	0.75787	1.1519	0.6952	0.92573	0.78161	0.37665	0.19198	0.26153	0.69353	0.63009	0.45406	0.39263	1.1264	0.77655	0.71665	0.69835	0.71723	NaN	0.74589	0.6756	0.70951	0.75088	0.85358	0.71093	0.71527	0.6725	0.72645	NaN	NaN	0.42231	S	3			0.999134	1.5052e-11	105.56	74.183	77.657	-1.047	1612900000	922880000	690000000	2256
NaN	NaN	NaN	NaN	NaN	NaN	NaN	NaN	NaN	NaN	NaN	NaN	NaN	0.83601	NaN	NaN	NaN	NaN	NaN	NaN	NaN	NaN	NaN	NaN	NaN	NaN	NaN	NaN	NaN	NaN	NaN	NaN	NaN	NaN	NaN	NaN	S	3			0.728068	1.91743e-13	110.55	82.515	61.436	0.38227	15124000	11503000	3621600	2389
NaN	NaN	NaN	NaN	0.86591	NaN	NaN	NaN	NaN	NaN	NaN	NaN	NaN	0.83601	NaN	NaN	NaN	NaN	NaN	NaN	NaN	NaN	NaN	NaN	NaN	NaN	NaN	NaN	NaN	NaN	NaN	NaN	NaN	NaN	NaN	NaN	S	3			0.728068	1.91743e-13	110.55	82.515	61.436	0.38227	22899000	16335000	6563400	2390
NaN	NaN	NaN	NaN	NaN	NaN	0.87756	NaN	NaN	NaN	NaN	NaN	NaN	NaN	NaN	NaN	NaN	0.49246	1.4038	NaN	NaN	0.74593	NaN	NaN	NaN	NaN	NaN	NaN	NaN	NaN	NaN	NaN	NaN	NaN	NaN	NaN	S	3			0.583665	7.06369e-14	110.7	87.574	66.432	0.79319	30900000	20403000	10496000	2392
NaN	NaN	NaN	NaN	NaN	NaN	NaN	NaN	NaN	NaN	NaN	NaN	NaN	NaN	1.1068	NaN	NaN	NaN	1.4038	NaN	NaN	0.74593	NaN	NaN	NaN	0.75269	NaN	NaN	NaN	NaN	NaN	NaN	NaN	0.61576	NaN	NaN	S	3			0.882889	7.06369e-14	110.7	87.574	66.365	0.66502	33829000	20040000	13789000	2394
NaN	NaN	NaN	NaN	NaN	NaN	NaN	NaN	NaN	0.79119	NaN	NaN	0.88847	NaN	NaN	NaN	NaN	NaN	NaN	NaN	NaN	NaN	NaN	NaN	NaN	0.75269	NaN	NaN	NaN	NaN	NaN	NaN	NaN	0.61576	0.72235	NaN	S	3			0.933954	2.42843e-09	92.258	71.225	66.365	0.66502	33674000	19339000	14335000	2397
1.4932	0.86307	0.8613	0.78584	0.80363	0.9212	0.76299	0.94677	0.94952	0.71113	0.75316	0.89996	0.90647	0.99331	NaN	0.69164	0.67038	NaN	NaN	NaN	NaN	NaN	NaN	NaN	NaN	NaN	NaN	NaN	NaN	NaN	NaN	0.83816	0.84904	1.05	0.84068	NaN	S	3			0.99737	0.00232255	102.89	36.873	89.231	0.15634	246740000	133720000	113020000	1796
NaN	NaN	NaN	NaN	NaN	NaN	NaN	NaN	NaN	NaN	NaN	NaN	NaN	NaN	NaN	NaN	NaN	NaN	NaN	NaN	NaN	NaN	NaN	NaN	NaN	NaN	NaN	NaN	NaN	NaN	NaN	NaN	NaN	NaN	NaN	NaN	S	2			0.522385	0.000107966	110.25	66.005	101.2	-0.3939	26305000	26305000	0	559
NaN	0.24611	NaN	0.73527	NaN	NaN	NaN	NaN	NaN	NaN	NaN	NaN	NaN	NaN	NaN	NaN	NaN	NaN	NaN	NaN	NaN	NaN	NaN	NaN	NaN	NaN	NaN	NaN	NaN	NaN	NaN	NaN	NaN	NaN	NaN	NaN	S	3			0.99671	1.31294e-05	136.52	69.595	86.189	0.14921	172470000	169050000	3422400	561
NaN	NaN	NaN	NaN	NaN	NaN	NaN	NaN	NaN	NaN	NaN	NaN	NaN	NaN	NaN	NaN	NaN	NaN	NaN	NaN	NaN	NaN	NaN	NaN	NaN	NaN	NaN	NaN	0.89177	NaN	NaN	NaN	NaN	NaN	NaN	NaN	S	2			0.49998	2.28172e-23	167.34	167.34	105.71	0.29414	3643400	2083800	1559600	60
NaN	NaN	NaN	NaN	NaN	NaN	NaN	NaN	NaN	NaN	NaN	NaN	NaN	NaN	NaN	NaN	NaN	NaN	NaN	NaN	NaN	NaN	NaN	NaN	NaN	NaN	NaN	NaN	0.89177	NaN	NaN	NaN	NaN	NaN	NaN	NaN	S	2			0.49998	2.28172e-23	167.34	167.34	105.71	0.29414	3643400	2083800	1559600	62
NaN	NaN	NaN	NaN	NaN	NaN	NaN	NaN	NaN	NaN	NaN	NaN	0.3774	NaN	NaN	NaN	NaN	NaN	NaN	NaN	NaN	NaN	NaN	1.1144	1.0785	0.79968	0.88368	NaN	NaN	0.63755	NaN	0.68595	NaN	NaN	NaN	NaN	S	3			0.960574	1.33685e-05	77.401	52.426	60.218	0.40382	68250000	39397000	28853000	511
1.2848	0.94514	0.88627	NaN	1.0082	NaN	0.90402	1.381	1.2022	0.79247	1.2825	NaN	1.3678	1.4151	NaN	NaN	NaN	1.2162	NaN	1.07	0.96466	0.873	0.98454	NaN	NaN	NaN	1.0648	NaN	1.2983	0.94952	1.1403	0.95311	2.1767	2.1554	1.4535	1.1283	S	3			0.821567	7.38815e-12	111.44	86.032	59.539	0.0084978	346280000	176640000	169640000	525
1.2848	0.94514	NaN	0.84179	1.1676	1.0901	0.90402	1.381	1.4196	0.79247	0.86338	1.3935	1.3092	1.8517	1.4736	1.2899	1.2077	1.2162	NaN	1.07	0.96466	1.4405	1.1602	1.1144	1.1105	0.79968	1.0648	0.96903	1.2983	1.0943	1.1403	1.3434	1.3192	1.6066	1.4138	1.3542	S	3			0.974355	2.37078e-17	123.03	81.517	90.268	-0.27927	716420000	352060000	364360000	526
NaN	0.62435	0.75744	0.45228	0.48778	NaN	NaN	NaN	NaN	NaN	NaN	NaN	0.72937	NaN	NaN	NaN	0.43294	NaN	NaN	0.89773	1.1942	0.76072	NaN	NaN	0.92915	0.55932	0.56579	0.86003	NaN	NaN	0.58152	0.66656	0.59931	NaN	0.87976	0.82016	S	3			1	2.56226e-06	124.46	100.77	76.526	-0.83131	325340000	151210000	174130000	549
1.0556	NaN	0.54643	NaN	0.64493	0.89313	0.86634	NaN	0.80037	0.85069	0.70581	NaN	NaN	0.74773	0.75408	1.4699	NaN	NaN	NaN	NaN	NaN	NaN	NaN	NaN	0.85423	NaN	0.68508	0.61367	0.83037	1.0111	NaN	0.91641	NaN	NaN	0.72809	0.35167	S	4			0.98198	0.00538596	44.541	31.519	44.541	-0.017517	151030000	84943000	66087000	235
1.206	0.67537	0.66454	0.67053	0.78897	0.75981	0.56947	0.81534	0.71847	0.45347	0.35259	0.18604	0.11385	NaN	NaN	NaN	NaN	0.05759	0.98539	0.68964	0.60598	0.66221	0.53258	0.53596	0.61123	0.49415	0.48871	0.48042	NaN	0.21373	NaN	0.083826	NaN	0.063965	NaN	0.060365	S	2			1	0.000429085	96.665	35.755	59.067	-0.17681	596560000	403780000	192780000	215
1.0188	0.94533	0.9869	0.93899	1.1382	1.0292	1.1469	1.3674	1.3765	1.1995	1.1931	1.2727	1.3263	1.5634	1.6903	2.1939	1.9478	1.942	1.1068	0.95786	1.1215	0.8989	0.935	0.89926	0.91135	0.92579	0.99271	0.87086	1.1173	1.0355	0.9623	0.9169	0.8685	0.96433	1.0897	0.9826	S	3			1	2.30538e-16	335.14	287.58	292.06	0.19477	1483100000	686290000	796820000	64
0.96294	NaN	NaN	NaN	NaN	NaN	NaN	NaN	NaN	NaN	NaN	NaN	NaN	NaN	NaN	NaN	NaN	NaN	NaN	NaN	NaN	NaN	NaN	NaN	NaN	NaN	NaN	NaN	NaN	NaN	NaN	NaN	NaN	NaN	NaN	NaN	S	3			1	4.05471e-06	326.81	265.68	326.81	0.63295	14499000	9703400	4795200	118
1.0394	NaN	0.69387	NaN	0.73295	0.70243	NaN	0.86683	NaN	NaN	0.6409	0.73064	NaN	NaN	NaN	0.78123	0.7084	0.65596	1.0404	0.70878	NaN	NaN	NaN	0.67205	NaN	0.6257	0.64241	0.66085	0.79112	0.64451	NaN	0.7037	NaN	NaN	0.74741	NaN	S	2			0.986825	0.000385751	98.077	61.858	98.077	-0.0026247	2505000000	1477900000	1027100000	194
1.0209	0.68602	0.65878	0.65122	0.72047	0.69035	0.59928	0.86615	0.82929	0.64895	0.66798	0.69292	0.74747	0.79887	0.73351	0.81521	0.70123	0.63528	1.002	0.68829	0.65262	0.6776	0.66184	0.66786	0.6682	0.62334	0.65097	0.68166	0.76646	0.64773	0.73806	0.69767	0.66515	0.6734	0.70443	0.71741	S	3			0.999996	0.000519998	219.35	169.63	219.35	-0.10255	4864900000	2798300000	2066600000	195
0.87848	0.52929	0.49719	0.48783	0.59297	0.32405	0.38344	0.56713	0.37782	0.27335	0.22594	NaN	NaN	NaN	NaN	NaN	NaN	NaN	0.92095	0.61205	0.56399	NaN	0.36209	0.66772	0.49066	NaN	0.33669	NaN	0.30398	NaN	NaN	NaN	NaN	NaN	NaN	NaN	S	2			1	0.000175448	107.13	71.365	99.238	0.14932	171610000	119460000	52149000	361
NaN	NaN	NaN	NaN	NaN	NaN	NaN	NaN	NaN	NaN	NaN	NaN	NaN	NaN	NaN	NaN	NaN	NaN	NaN	NaN	NaN	NaN	NaN	0.55337	NaN	0.43212	NaN	0.37668	NaN	NaN	NaN	NaN	NaN	NaN	NaN	NaN	S	2			0.999741	0.000223408	99.813	66.548	91.065	0.32849	29383000	22435000	6947700	470
0.84646	0.80102	0.72151	NaN	0.83628	0.77653	NaN	0.9886	NaN	0.69041	0.60122	NaN	0.69935	NaN	0.81816	0.89327	0.76732	0.7344	NaN	NaN	NaN	NaN	NaN	NaN	0.89901	NaN	NaN	NaN	NaN	NaN	0.77355	NaN	NaN	NaN	NaN	NaN	S	3			0.999997	7.51415e-05	234.04	212.22	201.08	0.045023	195980000	120680000	75305000	535
NaN	NaN	NaN	NaN	NaN	NaN	NaN	NaN	NaN	NaN	NaN	NaN	NaN	NaN	NaN	NaN	NaN	NaN	NaN	NaN	NaN	NaN	NaN	NaN	NaN	NaN	NaN	NaN	NaN	NaN	NaN	NaN	NaN	NaN	NaN	NaN	S	3			0.913193	0.00313599	63.392	37.805	41.513	0.042514	31252000	31252000	0	562
1.2222	0.68762	0.69463	0.56209	0.76467	0.79725	0.59055	0.83032	0.81396	0.52646	0.53277	0.6995	0.37521	0.34623	0.31863	0.22583	NaN	NaN	NaN	0.7733	NaN	0.74544	NaN	0.75423	0.64186	0.61496	0.62776	0.69833	0.71195	NaN	0.47364	NaN	NaN	NaN	NaN	NaN	S	3			0.983099	1.05634e-08	120.9	85.025	120.9	0.9676	441980000	280090000	161890000	242
1.2052	0.78309	0.68156	0.76931	0.7489	0.76723	0.87205	1.0608	0.7596	0.81028	0.77787	0.53123	0.80171	0.58687	0.80626	0.63701	0.50819	NaN	NaN	NaN	NaN	NaN	NaN	0.64008	0.69731	0.61777	NaN	NaN	1.0332	0.64846	0.57484	0.50913	0.95064	0.58991	0.58096	0.65787	S	3			0.999936	0.000415042	133.92	108.8	133.92	-0.076688	214440000	127270000	87167000	306
NaN	NaN	NaN	NaN	NaN	NaN	NaN	NaN	NaN	NaN	NaN	NaN	NaN	NaN	NaN	NaN	NaN	0.69042	NaN	NaN	NaN	NaN	NaN	NaN	NaN	NaN	NaN	NaN	NaN	NaN	NaN	NaN	NaN	NaN	NaN	NaN	S	3			0.702574	0.000496861	149.49	117.37	149.49	-0.12491	10445000	7035900	3408900	311
0.9286	0.74371	0.64345	0.67468	0.57706	0.70571	0.58704	0.50755	0.42086	0.37609	NaN	NaN	NaN	NaN	NaN	NaN	NaN	NaN	NaN	0.70764	0.8792	0.68896	0.61335	0.48384	NaN	0.39925	0.24445	NaN	NaN	NaN	NaN	NaN	NaN	NaN	NaN	NaN	S	3			0.999993	0.000883195	122.46	85.781	122.46	-0.35085	110500000	75729000	34775000	50
NaN	NaN	NaN	NaN	NaN	NaN	NaN	NaN	NaN	NaN	NaN	NaN	NaN	NaN	NaN	NaN	NaN	NaN	NaN	NaN	NaN	NaN	NaN	NaN	NaN	NaN	NaN	NaN	NaN	NaN	NaN	NaN	NaN	NaN	NaN	0.2244	S	2			0.531472	0.0032703	103.46	58.848	80.387	-0.34101	8643100	7586300	1056800	237
0.9756	0.78842	0.71176	0.6142	0.66881	0.65655	0.63324	0.80355	0.66116	0.6722	NaN	0.32505	0.56764	NaN	0.38045	NaN	NaN	NaN	1.0496	0.73448	0.82016	0.70612	0.52225	0.50495	0.66089	0.55532	0.60666	0.49739	0.71615	0.59054	0.40653	0.36517	0.33272	0.32246	0.27812	0.2244	S	3			0.999939	0.000458055	188.76	157.05	188.76	-0.066175	196430000	124580000	71856000	238
1.0166	0.78842	0.9655	0.65615	0.83436	1.0678	0.65812	1.0266	1.0201	0.72309	0.91716	1.1535	1.3212	1.4827	1.5727	1.3048	1.6607	1.3699	1.3462	0.7814	0.73738	0.78997	0.95075	0.86591	1.2785	0.70576	1.323	0.66461	1.2878	0.84173	1.5423	0.36517	0.33272	0.32246	0.27812	0.2244	S	3			1	0.000239467	188.76	157.05	183.72	-0.064937	479470000	264240000	215230000	245
NaN	NaN	NaN	NaN	NaN	NaN	NaN	NaN	NaN	NaN	NaN	NaN	NaN	NaN	NaN	NaN	NaN	NaN	0.70826	NaN	NaN	NaN	NaN	NaN	NaN	NaN	NaN	NaN	NaN	NaN	NaN	NaN	NaN	NaN	NaN	NaN	S	3			0.975215	0.000467319	150.37	108.29	150.37	-0.015638	14793000	5959300	8833400	891
0.95618	0.29275	0.72191	0.5751	0.71798	0.84266	0.67006	0.86016	0.74181	0.61663	0.50019	0.63114	0.25595	0.30581	0.13083	0.10063	0.071667	0.07753	1.0949	0.82866	0.66972	0.63762	0.75619	0.61528	0.63462	0.67333	0.54802	0.5841	0.68016	0.34983	0.27848	0.20255	0.15994	NaN	NaN	0.11585	S	2			0.99999	1.2019e-22	228.64	170.67	172.85	-0.26372	1229600000	799040000	430540000	893
NaN	1.1565	NaN	NaN	0.82473	NaN	NaN	1.072	NaN	1.1826	0.92055	1.1236	1.2222	1.8104	2.3727	2.3276	3.0277	NaN	0.81184	NaN	NaN	NaN	1.1703	NaN	NaN	NaN	NaN	NaN	NaN	NaN	NaN	NaN	NaN	NaN	2.6516	2.5965	S	3			1	0.000958475	190.66	132.39	190.66	-0.21576	62620000	22844000	39776000	270
0.77214	NaN	0.88157	0.9562	1.024	0.82038	NaN	NaN	NaN	0.21349	NaN	1.2591	NaN	NaN	0.8751	NaN	NaN	NaN	NaN	NaN	NaN	NaN	NaN	NaN	NaN	NaN	NaN	NaN	NaN	NaN	NaN	NaN	NaN	NaN	NaN	NaN	S	4			0.993652	0.00403092	82.663	60.612	55.782	0.67197	66235000	36648000	29587000	440
1.0003	0.7453	0.71262	0.66785	NaN	0.70502	0.49094	0.63765	0.42398	0.2741	0.20505	0.09964	0.069601	0.079646	0.071323	0.061144	0.054781	0.046829	1.1181	0.69854	0.58753	0.60221	NaN	NaN	NaN	NaN	NaN	NaN	NaN	NaN	NaN	NaN	NaN	NaN	NaN	NaN	S	2			0.999328	6.0181e-05	104.16	104.16	104.16	0.06434	465440000	329650000	135790000	1093
NaN	0.81848	0.76526	NaN	0.76211	0.90401	0.68534	0.83846	NaN	0.33401	NaN	NaN	NaN	NaN	NaN	NaN	NaN	NaN	1.2296	0.72219	1.037	0.96474	0.89722	NaN	NaN	0.48304	0.31399	NaN	0.36968	0.13119	NaN	NaN	NaN	NaN	NaN	NaN	S	3			0.997301	2.38977e-21	149.64	122.1	149.64	-0.36805	502630000	335420000	167210000	86
1.1525	NaN	NaN	NaN	NaN	NaN	NaN	NaN	NaN	NaN	NaN	NaN	NaN	NaN	NaN	NaN	NaN	NaN	NaN	NaN	NaN	NaN	NaN	NaN	NaN	NaN	NaN	NaN	NaN	NaN	NaN	NaN	NaN	NaN	NaN	NaN	S	3			0.719998	9.45105e-08	92.01	71.111	76.796	-0.65185	44332000	20666000	23666000	90
1.0155	NaN	NaN	0.70987	0.90921	NaN	NaN	NaN	NaN	0.6826	0.34139	0.51426	0.51755	0.48045	NaN	NaN	0.33018	NaN	1.1587	0.46207	0.94291	0.56074	0.54819	0.50061	NaN	NaN	0.63501	NaN	NaN	NaN	0.60108	0.3859	0.34519	NaN	NaN	NaN	S	3			0.997922	0.000114677	191.79	137.5	191.79	0.18418	148740000	88748000	59993000	941
NaN	NaN	NaN	NaN	NaN	1.0069	0.64867	0.98384	1.0605	0.90819	NaN	1.0206	NaN	0.92584	1.0143	1.1704	0.86796	1.042	1.4956	0.88535	NaN	NaN	NaN	NaN	1.0405	0.82713	0.84865	NaN	1.073	0.75769	0.95266	0.88729	0.94008	0.71223	0.86082	0.78174	S	3			0.999245	0.000483954	64.298	45.436	64.298	-0.64723	198680000	108810000	89862000	258
0.9104	0.6885	0.61002	0.59802	0.61065	0.60957	0.49765	0.80169	0.71654	0.53504	0.52465	0.62228	0.61325	0.65907	0.58927	0.48717	0.46952	0.38731	0.90356	0.65315	0.46041	0.56176	0.54972	0.55385	0.62532	0.53522	0.56525	0.58473	0.58666	0.4817	0.60748	0.539	0.49523	0.47255	0.47352	0.443	S	2			0.999998	4.61875e-05	108.32	38.603	95.428	-0.0050421	1675900000	973290000	702560000	619
NaN	NaN	NaN	0.52003	0.45809	0.525	0.37185	0.39314	NaN	NaN	0.1901	NaN	0.18838	NaN	0.45887	0.57255	0.64635	1.2042	NaN	NaN	0.56964	NaN	NaN	NaN	NaN	NaN	NaN	NaN	NaN	NaN	NaN	NaN	NaN	NaN	NaN	NaN	S	2			0.99977	0.0026807	72.583	49.115	70.451	0.22482	88351000	51563000	36788000	557
NaN	NaN	NaN	NaN	NaN	NaN	NaN	NaN	NaN	NaN	NaN	NaN	NaN	NaN	NaN	NaN	NaN	NaN	NaN	NaN	NaN	NaN	NaN	NaN	NaN	NaN	NaN	NaN	NaN	NaN	NaN	NaN	NaN	NaN	NaN	NaN	S	4			0.499989	0.000100665	54.31	37.432	54.31	-0.29197	3706500	0	3706500	570
NaN	NaN	NaN	NaN	NaN	NaN	NaN	NaN	NaN	NaN	NaN	NaN	NaN	NaN	NaN	NaN	NaN	NaN	NaN	NaN	NaN	NaN	NaN	NaN	NaN	NaN	NaN	NaN	NaN	NaN	NaN	NaN	NaN	NaN	NaN	NaN	S	4			0.499989	0.000100665	54.31	37.432	54.31	-0.29197	3706500	0	3706500	572
NaN	NaN	NaN	NaN	NaN	1.0855	NaN	NaN	NaN	1.174	NaN	NaN	NaN	NaN	NaN	NaN	NaN	2.3672	NaN	NaN	NaN	NaN	NaN	NaN	NaN	NaN	NaN	NaN	NaN	NaN	NaN	NaN	NaN	NaN	NaN	NaN	S	4			0.701093	0.000100665	54.31	37.432	45.017	-0.20261	51340000	19675000	31665000	587
NaN	NaN	NaN	NaN	NaN	NaN	NaN	NaN	NaN	NaN	0.79464	NaN	0.76411	NaN	0.54227	NaN	0.55222	0.44432	NaN	NaN	0.87316	NaN	NaN	1.3236	NaN	NaN	NaN	NaN	NaN	NaN	NaN	NaN	NaN	0.88852	0.62657	0.73038	S	3			0.999318	0.000255902	152.68	120.39	152.68	0.45994	94258000	46110000	48148000	163
0.88475	0.65557	0.61689	NaN	NaN	0.66584	NaN	0.60007	NaN	0.74278	NaN	NaN	0.39976	NaN	0.28881	NaN	NaN	NaN	NaN	0.55097	1.2088	0.58475	0.22263	NaN	0.57821	NaN	0.71242	0.64952	0.68215	NaN	NaN	NaN	NaN	NaN	NaN	NaN	S	4			1	0.000737237	96.561	96.561	74.657	-0.67274	243630000	153220000	90401000	1031
NaN	NaN	NaN	NaN	NaN	NaN	NaN	NaN	NaN	NaN	NaN	NaN	NaN	NaN	NaN	NaN	NaN	NaN	NaN	NaN	NaN	NaN	NaN	NaN	NaN	NaN	NaN	NaN	NaN	NaN	NaN	NaN	NaN	NaN	NaN	NaN	S	3			1	0.000596062	180.3	113.31	180.3	0.4227	1685400	1685400	0	184
1.0774	0.63063	0.54943	NaN	0.5346	NaN	0.32388	0.45872	NaN	0.16435	NaN	NaN	NaN	NaN	NaN	NaN	NaN	NaN	NaN	NaN	NaN	NaN	NaN	NaN	NaN	NaN	NaN	NaN	NaN	NaN	NaN	NaN	NaN	NaN	NaN	NaN	S	2			0.999269	0.000248066	103.77	68.999	86.258	0.61088	80758000	56680000	24078000	50
NaN	NaN	NaN	NaN	NaN	NaN	NaN	NaN	NaN	NaN	NaN	NaN	NaN	NaN	NaN	NaN	NaN	NaN	NaN	NaN	NaN	0.84175	0.93959	NaN	NaN	NaN	NaN	NaN	NaN	NaN	NaN	NaN	NaN	NaN	NaN	NaN	S	2			0.97093	9.66216e-07	100.14	79.899	100.14	-0.26911	7556700	4258400	3298300	77
0.95184	NaN	0.98024	NaN	0.59634	1.1382	NaN	0.78074	0.78402	NaN	NaN	NaN	NaN	1.0486	0.80531	NaN	1.0396	0.70259	0.83017	0.72603	0.50019	0.77541	0.58642	0.78906	0.69991	0.58996	0.6523	0.62652	0.7591	0.44718	NaN	0.6192	0.76254	NaN	0.6301	0.97422	S	3			0.999991	8.4878e-09	135.08	118.05	113.86	0.14687	184550000	96876000	87678000	683
1.4069	0.81992	0.83224	0.86555	0.84383	NaN	NaN	1.462	NaN	NaN	NaN	0.69483	NaN	NaN	NaN	NaN	NaN	NaN	NaN	NaN	0.77939	0.79137	0.90181	0.57214	NaN	0.85945	NaN	0.48796	NaN	NaN	NaN	NaN	NaN	NaN	NaN	NaN	S	2			0.986539	0.000360317	85.969	46.007	85.969	0.1771	81939000	44340000	37599000	54
0.84122	0.84048	NaN	NaN	NaN	NaN	NaN	NaN	NaN	NaN	1.0136	0.89281	NaN	1.0185	1.0717	1.4646	0.87384	NaN	NaN	NaN	NaN	NaN	NaN	NaN	0.66346	NaN	1.168	1.2855	1.2244	NaN	1.3844	0.85691	1.0087	0.94286	1.1059	1.2317	S	3			1	2.83208e-05	110.04	84.333	110.04	-0.16735	65579000	32287000	33293000	2177
NaN	NaN	NaN	NaN	NaN	NaN	NaN	NaN	NaN	NaN	NaN	NaN	NaN	NaN	NaN	NaN	NaN	NaN	NaN	NaN	NaN	NaN	NaN	NaN	NaN	NaN	NaN	NaN	NaN	NaN	NaN	NaN	NaN	NaN	NaN	NaN	S	3			0.459977	0.000301091	58.565	39.968	57.981	-0.18014	0	0	0	430
1.0331	NaN	NaN	NaN	NaN	NaN	0.74063	0.90058	NaN	NaN	NaN	NaN	NaN	NaN	NaN	NaN	0.47952	NaN	NaN	NaN	NaN	NaN	NaN	NaN	NaN	NaN	0.76582	0.75901	0.87342	NaN	NaN	0.64075	NaN	NaN	NaN	NaN	S	3			0.763311	8.06998e-06	81.144	54.698	69.088	-0.042723	753170000	415390000	337770000	432
NaN	NaN	NaN	NaN	NaN	NaN	NaN	NaN	NaN	NaN	NaN	NaN	NaN	NaN	NaN	0.59131	NaN	NaN	NaN	NaN	NaN	NaN	NaN	NaN	NaN	NaN	NaN	NaN	NaN	NaN	NaN	NaN	NaN	NaN	NaN	NaN	S	3			0.556453	4.63055e-05	69.255	55.667	69.255	-0.23526	100330000	64995000	35330000	435
NaN	NaN	NaN	NaN	NaN	NaN	NaN	NaN	NaN	NaN	NaN	NaN	NaN	NaN	NaN	NaN	NaN	NaN	NaN	NaN	NaN	NaN	NaN	NaN	NaN	NaN	NaN	NaN	NaN	NaN	NaN	NaN	NaN	NaN	NaN	NaN	S	3			0.499856	0.000546842	163.9	112.17	163.9	-0.17284	0	0	0	211
0.87557	0.98548	0.91658	0.96815	1.0774	1.0743	0.89093	1.0543	1.1042	0.70946	0.66482	0.25081	NaN	NaN	NaN	NaN	NaN	NaN	1.0167	0.94516	0.83082	1.0481	0.95714	1.0605	0.85001	0.84487	0.73763	0.83416	NaN	0.24164	NaN	NaN	NaN	NaN	NaN	NaN	S	3			0.999979	3.55651e-23	342.09	280.96	342.09	0.10782	616730000	371470000	245260000	212
NaN	NaN	NaN	0.83921	0.96048	NaN	1.1594	NaN	NaN	0.99753	NaN	0.98084	NaN	1.1297	0.93558	NaN	0.8837	0.79592	NaN	0.91216	1.3465	1.1017	1.0357	NaN	NaN	0.97352	1.0418	0.8998	1.0919	1.3548	NaN	0.98576	0.90448	0.88151	NaN	0.8798	S	3			0.994406	1.08647e-07	93.416	69.668	60.33	-0.35113	554800000	285890000	268910000	239
NaN	NaN	0.86144	0.92712	NaN	0.88578	0.97547	0.80083	0.93091	0.75907	NaN	NaN	NaN	NaN	0.66059	NaN	NaN	0.79808	NaN	0.89073	0.62103	NaN	0.88533	NaN	NaN	NaN	NaN	NaN	NaN	0.55502	NaN	1.0369	0.77552	NaN	1.2142	NaN	S	3			0.974395	0.000673358	97.452	49.772	87.713	1.0699	96040000	51799000	44241000	421
0.74947	0.90306	0.70081	0.83709	0.9555	0.79103	0.61606	1.1562	1.0897	0.46455	0.72541	0.98542	0.85587	1.1634	0.8005	0.50319	1.0181	0.6905	0.87968	1.1583	NaN	0.84911	1.0319	1.1366	0.83491	0.85944	0.74261	0.8161	1.1414	NaN	NaN	NaN	NaN	NaN	NaN	0.68363	S	3			1	0.000362238	208.37	171.9	170.48	-0.10712	251730000	134450000	117280000	21
NaN	NaN	NaN	NaN	NaN	NaN	NaN	NaN	NaN	NaN	NaN	NaN	NaN	NaN	NaN	NaN	NaN	NaN	NaN	NaN	NaN	NaN	NaN	NaN	NaN	NaN	NaN	NaN	NaN	NaN	NaN	NaN	NaN	NaN	NaN	NaN	S	3			0.486418	1.061e-06	76.267	64.045	75.103	1.1707	0	0	0	33
NaN	NaN	NaN	NaN	NaN	NaN	NaN	NaN	NaN	NaN	NaN	NaN	NaN	NaN	NaN	NaN	NaN	NaN	NaN	NaN	NaN	NaN	NaN	NaN	NaN	NaN	NaN	NaN	NaN	NaN	NaN	NaN	NaN	NaN	NaN	NaN	S	3			0.417249	1.061e-06	76.267	64.045	49.608	1.4063	0	0	0	35
NaN	NaN	NaN	NaN	NaN	NaN	NaN	NaN	NaN	NaN	NaN	NaN	NaN	NaN	NaN	NaN	NaN	NaN	NaN	NaN	NaN	NaN	NaN	NaN	NaN	NaN	NaN	NaN	NaN	NaN	NaN	NaN	NaN	NaN	NaN	NaN	S	3			0.417249	1.061e-06	76.267	64.045	49.608	1.4063	0	0	0	37
1.0091	0.54574	0.57254	0.53768	0.64103	0.68286	0.58146	0.84533	0.70481	0.74071	0.616	0.69837	0.83054	0.77434	0.68563	0.78595	0.77393	0.66526	NaN	0.64124	0.94166	NaN	0.59358	0.65206	0.78965	0.62486	0.67152	0.60911	0.754	0.63914	0.68618	0.60811	0.68097	NaN	0.77131	0.63747	S	2			0.999996	8.98057e-05	101.78	77.711	86.367	0.1137	232800000	131390000	101410000	361
0.98858	0.84939	0.70294	0.67904	0.71616	0.679	0.64154	0.93583	0.76003	0.62966	0.52437	0.30601	NaN	0.16652	NaN	NaN	NaN	0.048807	1.0163	0.82256	0.63957	0.74514	0.69356	0.66551	0.69049	0.63113	0.6061	0.48722	0.74135	0.37421	0.31336	0.19087	0.15352	0.13739	0.14244	0.096432	S	3			0.999697	0.000471611	232.37	183.46	232.37	-0.094128	427130000	269440000	157690000	139
NaN	NaN	NaN	NaN	NaN	NaN	NaN	NaN	NaN	NaN	NaN	NaN	NaN	NaN	NaN	NaN	NaN	NaN	NaN	NaN	NaN	NaN	NaN	NaN	NaN	NaN	NaN	NaN	NaN	NaN	NaN	NaN	NaN	NaN	NaN	NaN	S	3			0.333213	0.000924111	56.404	34.92	56.404	-0.52238	0	0	0	50
NaN	NaN	NaN	NaN	NaN	NaN	NaN	NaN	NaN	NaN	NaN	NaN	NaN	NaN	NaN	NaN	NaN	NaN	NaN	NaN	NaN	NaN	NaN	NaN	NaN	NaN	NaN	NaN	NaN	NaN	NaN	NaN	NaN	NaN	NaN	NaN	S	3			0.333213	0.000924111	56.404	34.92	56.404	-0.52238	0	0	0	51
1.0735	0.70974	0.63106	0.66119	0.73334	0.5733	0.52283	0.78398	0.55264	0.41431	0.30691	0.26578	0.23567	0.22365	0.16664	0.13281	NaN	NaN	1.1487	0.62743	0.59754	0.55816	NaN	0.5659	0.44644	NaN	NaN	0.32462	0.43876	NaN	0.16432	NaN	NaN	NaN	NaN	NaN	S	3			1	5.54611e-05	69.765	46.257	61.616	0.083788	633450000	427290000	206160000	254
NaN	NaN	NaN	NaN	NaN	NaN	NaN	NaN	NaN	NaN	NaN	NaN	NaN	NaN	NaN	NaN	NaN	NaN	NaN	NaN	NaN	NaN	NaN	1.0438	0.91441	0.50883	NaN	0.73232	NaN	NaN	0.97351	NaN	NaN	0.66478	NaN	NaN	S	2			0.998282	0.000118616	107.98	63.319	107.98	0.556	22502000	13288000	9214000	202
1.0528	0.92433	0.73978	0.66423	0.86096	0.78157	0.72354	1.0745	1.0655	0.71372	0.81731	0.96121	0.8978	0.98706	0.68357	0.75883	0.66212	0.57011	1.094	0.76506	1.0541	0.74055	0.95173	0.85638	0.76275	0.70306	NaN	0.69055	1.1415	NaN	NaN	0.80384	0.77058	0.69052	NaN	0.60959	S	4			1	0.00211881	89.043	59.944	89.043	0.51006	241140000	133140000	108000000	152
1.0528	0.92433	0.73978	0.66423	0.86096	0.75986	0.72354	1.0745	1.0655	0.71372	0.81731	0.86314	0.8978	0.98706	0.72567	0.75883	0.66212	5.6036	1.094	0.76506	1.0541	0.74055	0.95173	0.85638	0.76275	0.70306	NaN	0.69055	1.1415	NaN	NaN	0.80384	0.77058	0.69052	NaN	0.60959	S	4			1	0.00211881	89.043	59.944	89.043	0.51006	313190000	149300000	163890000	156
1.0528	0.92433	0.73978	0.66423	0.86096	0.75986	0.72354	1.0745	1.0655	0.71372	0.81731	0.86314	0.8978	0.98706	0.72567	0.75883	0.66212	5.6036	1.094	0.76506	1.0541	0.74055	0.95173	0.85638	0.76275	0.70306	NaN	0.69055	1.1415	NaN	NaN	0.80384	0.77058	0.69052	NaN	0.60959	S	4			1	0.00211881	89.043	59.944	89.043	0.51006	313190000	149300000	163890000	160
1.1266	NaN	0.68711	NaN	NaN	0.93484	NaN	0.91158	NaN	0.76691	NaN	0.6754	0.94907	0.68317	NaN	0.80167	0.65148	NaN	NaN	0.97902	1.4086	0.90529	0.91259	NaN	NaN	NaN	NaN	0.71838	0.74066	1.2043	0.72261	0.69908	0.69252	0.62216	NaN	NaN	S	3			0.999849	0.00326564	55.208	38.896	48.832	-0.89051	214810000	114130000	100680000	46
NaN	NaN	NaN	NaN	NaN	NaN	NaN	0.92133	NaN	NaN	NaN	0.67664	NaN	0.79819	0.75256	0.75805	0.66972	0.61021	NaN	NaN	NaN	NaN	NaN	0.67536	0.60293	0.67973	0.61796	0.68458	0.79871	0.5577	0.81783	NaN	0.67566	NaN	0.64228	0.75305	S	2			0.945278	0.00367017	70.68	42.998	66.215	-0.092873	120890000	76487000	44402000	128
0.92678	NaN	NaN	NaN	NaN	0.6135	NaN	NaN	NaN	NaN	NaN	NaN	NaN	NaN	NaN	NaN	NaN	NaN	0.85235	0.80136	0.69845	0.82188	0.6099	0.63333	NaN	NaN	0.42016	0.39944	NaN	NaN	NaN	0.26439	NaN	NaN	NaN	NaN	S	3			0.972811	0.00024603	165.58	124.89	105.53	-0.34513	64509000	41185000	23324000	113
NaN	0.78459	0.76602	NaN	0.79298	NaN	NaN	1.012	NaN	NaN	NaN	NaN	NaN	0.53107	0.46695	NaN	NaN	NaN	1.2999	1.0159	NaN	NaN	NaN	NaN	NaN	NaN	NaN	NaN	0.79772	NaN	NaN	0.45452	NaN	NaN	NaN	NaN	S	2			0.558809	4.61214e-10	145.7	102.2	103.66	-0.012369	51978000	32043000	19935000	906
NaN	0.93532	0.70937	0.69941	0.79633	NaN	NaN	NaN	NaN	NaN	NaN	NaN	NaN	NaN	NaN	NaN	NaN	NaN	NaN	0.84996	NaN	NaN	NaN	NaN	NaN	NaN	NaN	NaN	NaN	NaN	NaN	NaN	NaN	NaN	NaN	NaN	S	3			1	6.60444e-05	73.672	57.685	53.545	0.94472	143640000	86296000	57342000	1577
1.0173	0.93532	0.64749	0.67589	0.67986	0.82439	0.72162	0.8523	0.88178	0.64196	NaN	0.74057	0.66965	0.78127	NaN	0.61664	0.44136	NaN	1.2146	0.75516	0.72736	0.64213	0.63919	0.6686	0.64156	0.66983	0.65555	0.71633	0.75669	0.64614	NaN	0.65388	0.57886	NaN	0.43658	0.46878	S	3			1	3.43938e-07	97.352	78.229	53.545	0.94472	1133700000	670490000	463220000	1588
0.88735	1.0956	1.2666	1.1188	1.165	1.3022	0.96309	1.321	1.3037	0.90988	1.0617	1.0595	1.1983	1.3475	1.0913	1.1777	1.1505	1.0839	1.3459	1.5903	1.3317	1.0648	1.0175	1.1363	1.1854	0.95755	1.1733	1.028	0.9695	1.2922	1.3326	1.1836	1.1514	1.1192	1.249	1.1435	S	3			1	1.09082e-27	158.78	136.02	60.86	0.65139	1029600000	499630000	529970000	2928
1.0475	0.60704	0.58462	0.53076	0.57294	0.56399	0.48559	0.62509	0.56129	0.44976	0.43918	0.39957	0.32086	0.28997	0.20139	0.11352	0.075041	0.042253	1.0501	0.61751	0.56176	0.55197	0.57831	0.54767	0.54168	0.51056	0.50788	0.49884	0.575	0.39826	0.41826	0.30689	0.2722	0.17928	0.12423	0.098177	S	3			1	0.000590294	189.82	64.664	175.91	-0.0051616	2742000000	1795200000	946840000	359
NaN	NaN	NaN	NaN	NaN	NaN	NaN	NaN	NaN	NaN	NaN	NaN	NaN	NaN	NaN	NaN	NaN	NaN	NaN	NaN	0.82324	0.73726	0.62916	NaN	NaN	NaN	NaN	NaN	NaN	NaN	NaN	NaN	NaN	NaN	NaN	NaN	S	2			0.832213	0.000195524	88.976	69.678	88.976	-0.025907	4729200	2965600	1763600	427
NaN	NaN	NaN	NaN	NaN	NaN	NaN	NaN	NaN	NaN	NaN	NaN	NaN	NaN	NaN	NaN	NaN	NaN	NaN	NaN	NaN	NaN	NaN	NaN	NaN	NaN	NaN	NaN	NaN	NaN	NaN	NaN	NaN	NaN	NaN	NaN	S	2			1	2.05105e-69	216.15	188.7	216.15	-0.69715	1050500000	0	1050500000	339
NaN	1.015	NaN	NaN	NaN	NaN	NaN	NaN	NaN	1.9427	NaN	NaN	0.9916	NaN	NaN	NaN	NaN	NaN	NaN	NaN	NaN	NaN	NaN	NaN	NaN	NaN	NaN	NaN	NaN	NaN	0.53629	1.3694	NaN	NaN	NaN	1.0548	S	3			0.770176	4.23807e-10	95.19	71.906	67.744	-0.41398	64468000	31246000	33222000	655
NaN	NaN	NaN	NaN	NaN	NaN	NaN	NaN	NaN	NaN	NaN	NaN	NaN	NaN	NaN	NaN	NaN	NaN	NaN	NaN	NaN	NaN	NaN	NaN	NaN	NaN	NaN	NaN	NaN	NaN	NaN	NaN	0.95523	NaN	NaN	NaN	S	3			0.53864	2.83485e-06	65.495	48.112	49.187	0.46322	6090700	3858700	2232000	657
1.0776	0.66251	0.70289	0.72046	0.75823	0.78689	0.59037	0.96076	0.81817	0.64222	0.69186	0.7209	0.69432	0.68373	0.56279	0.46906	NaN	0.25985	1.0586	0.73017	0.619	0.68452	0.75067	0.74865	0.69802	0.65216	0.68128	0.68515	0.83664	0.58998	0.74419	0.58405	0.54988	0.5047	0.42177	0.35706	S	3			0.999999	0.000256126	167.93	126.31	139.3	-0.074495	1032200000	594400000	437790000	831
1.0806	0.43787	0.43709	NaN	NaN	NaN	NaN	NaN	NaN	NaN	NaN	NaN	NaN	NaN	NaN	NaN	NaN	NaN	0.91413	0.39759	0.45599	NaN	NaN	NaN	NaN	NaN	NaN	NaN	NaN	NaN	NaN	NaN	NaN	NaN	NaN	NaN	S	2			1	8.98611e-08	131.06	104.35	105.03	0.033009	96790000	71266000	25524000	319
1.1095	0.39581	NaN	NaN	NaN	NaN	NaN	NaN	NaN	NaN	NaN	NaN	NaN	NaN	NaN	NaN	NaN	NaN	NaN	NaN	NaN	NaN	NaN	NaN	NaN	NaN	NaN	NaN	NaN	NaN	NaN	NaN	NaN	NaN	NaN	NaN	S	3			1	0.00074972	158.34	88.14	89.46	-0.054427	22901000	16380000	6520700	260
1.0274	0.80742	0.62708	0.9482	0.76278	0.8184	0.7316	1.0462	0.88763	0.44818	0.76148	0.58285	0.20506	0.24704	0.10362	NaN	0.11962	NaN	0.98231	0.79784	0.573	0.82888	1.0906	1.0649	0.76088	0.72037	0.72878	0.78734	0.92845	0.39166	0.51572	0.21735	0.13661	0.25067	0.15946	0.21691	S	2			0.998405	2.28629e-05	112.17	69.747	101.72	0.017056	487840000	290350000	197480000	177
NaN	NaN	NaN	NaN	NaN	NaN	NaN	NaN	NaN	NaN	NaN	NaN	NaN	NaN	NaN	NaN	NaN	NaN	NaN	NaN	NaN	NaN	NaN	NaN	NaN	NaN	NaN	NaN	NaN	NaN	NaN	NaN	NaN	NaN	NaN	NaN	S	3			0.891429	0.00570222	53.454	25.099	53.454	0.0023004	11774000	11774000	0	435
0.58173	0.40136	0.57631	NaN	NaN	0.63118	NaN	NaN	NaN	NaN	NaN	NaN	NaN	NaN	NaN	NaN	NaN	NaN	NaN	NaN	NaN	NaN	NaN	NaN	NaN	NaN	NaN	NaN	NaN	NaN	NaN	NaN	NaN	NaN	NaN	NaN	S	4			0.837703	0.00570222	70.784	39.742	52.99	0.37312	39856000	25825000	14032000	436
1.2366	0.72135	0.74139	0.56107	0.58695	0.69499	0.66082	0.95945	0.74549	0.41056	0.45736	0.27193	NaN	NaN	0.26899	NaN	NaN	NaN	NaN	NaN	0.91614	0.68519	NaN	NaN	NaN	0.81952	NaN	NaN	NaN	0.46018	0.26745	NaN	NaN	NaN	NaN	0.26197	S	4			0.958318	9.73955e-05	124.08	102.18	98.804	-0.22063	1357400000	812830000	544580000	441
NaN	NaN	NaN	0.56428	NaN	NaN	0.58699	NaN	NaN	NaN	NaN	NaN	NaN	NaN	NaN	NaN	NaN	NaN	NaN	0.59277	NaN	NaN	0.83785	NaN	NaN	NaN	NaN	NaN	NaN	NaN	NaN	NaN	NaN	NaN	NaN	NaN	S	4			0.778656	0.000248657	102.07	102.07	40.798	0.018203	94464000	57309000	37155000	443
1.2331	0.6792	0.65366	0.56267	0.61628	0.6644	0.62281	0.88075	0.71485	0.41056	0.51525	0.23094	NaN	0.1121	0.26899	NaN	NaN	NaN	0.94915	0.66262	0.91614	0.8315	0.83785	NaN	NaN	0.81952	NaN	NaN	NaN	0.35128	0.26745	NaN	NaN	NaN	NaN	0.26197	S	4			0.999999	9.73955e-05	124.08	102.18	92.798	0.25852	1889500000	1177700000	711800000	448
0.98966	0.6749	0.68572	0.59631	0.75381	0.72856	0.58893	0.75156	0.73152	0.62447	0.51774	0.32678	0.24269	0.18903	0.10769	0.082552	0.054496	0.056698	1.0314	0.67189	0.8685	0.61004	0.55059	0.39485	0.55411	NaN	0.70615	0.60526	0.551	NaN	NaN	NaN	NaN	NaN	NaN	NaN	S	3			0.999946	0.00024676	83.964	61.201	83.964	0.12226	887240000	548710000	338530000	187
0.98966	0.65905	NaN	0.5884	0.83764	0.84785	0.58946	0.71416	0.75984	0.59613	0.51582	0.30408	NaN	NaN	NaN	NaN	NaN	NaN	1.0314	0.67189	0.8685	NaN	0.55059	0.39485	0.55411	NaN	0.70615	0.60526	0.551	NaN	NaN	NaN	NaN	NaN	NaN	NaN	S	3			0.968831	0.00257732	63.559	28.471	63.559	0.21754	365660000	199100000	166560000	191
1.3269	0.71821	0.68572	0.51002	0.63581	0.93313	0.43228	0.79091	0.93313	0.46316	0.6534	0.87495	0.52359	0.58501	0.10769	0.082552	0.054496	0.056698	0.95705	0.53794	0.65141	0.56738	0.74888	0.72887	0.72698	0.92925	0.9421	0.7433	0.85724	0.67901	0.63131	0.55724	NaN	0.35262	0.39146	0.41688	S	3			1	0.00024676	192.44	150.13	192.44	-0.68414	808470000	516320000	292150000	193
1.3269	0.71821	0.68572	0.51002	0.63581	0.93313	0.43228	0.75156	0.93313	0.46316	0.6534	0.87495	2.7735	3.5727	3.9045	0.082552	0.054496	0.056698	0.95705	0.53794	0.65141	0.56738	0.74888	0.72887	0.72698	0.92925	0.9421	0.7433	0.85724	0.67901	0.63131	0.55724	NaN	0.35262	0.39146	0.41688	S	3			1	0.00024676	192.44	150.13	119	-0.24543	1064900000	647720000	417160000	198
NaN	NaN	NaN	NaN	NaN	NaN	NaN	NaN	NaN	NaN	NaN	NaN	NaN	NaN	NaN	NaN	NaN	NaN	NaN	NaN	NaN	NaN	NaN	0.58745	0.9941	0.64646	0.68436	0.4787	0.82266	NaN	NaN	NaN	NaN	NaN	NaN	NaN	S	2			0.594027	1.58414e-05	118.24	78.892	92.565	-0.15626	30407000	19622000	10785000	573
0.89583	0.66256	NaN	0.71966	NaN	NaN	NaN	NaN	0.77072	NaN	NaN	NaN	NaN	NaN	NaN	NaN	NaN	NaN	0.9434	NaN	1.1144	0.90509	0.84454	0.71353	0.88133	0.76064	0.74679	0.4787	0.72284	NaN	NaN	NaN	NaN	NaN	NaN	NaN	S	3			0.999839	7.77129e-17	176.85	142.1	176.85	-0.11593	168540000	105730000	62805000	577
1.1582	NaN	0.64055	1.249	NaN	NaN	0.9287	0.7718	0.7098	0.79612	0.84161	0.58218	0.43557	0.50491	NaN	NaN	NaN	NaN	1.2002	0.69143	NaN	0.81978	0.71403	NaN	NaN	NaN	NaN	NaN	NaN	NaN	NaN	NaN	NaN	NaN	NaN	NaN	S	2			0.999851	1.28491e-05	140.33	117.79	100.94	1.397	88335000	54912000	33423000	393
0.90518	0.86887	0.59542	NaN	NaN	NaN	NaN	NaN	NaN	NaN	NaN	NaN	NaN	NaN	NaN	NaN	NaN	NaN	NaN	NaN	NaN	NaN	NaN	NaN	NaN	NaN	NaN	NaN	NaN	NaN	NaN	NaN	NaN	NaN	NaN	NaN	S	3			1	0.000960795	113.07	78.314	113.07	-0.070979	18204000	9070500	9133200	794
NaN	0.49483	NaN	NaN	NaN	NaN	NaN	0.23356	NaN	NaN	NaN	NaN	NaN	NaN	NaN	NaN	NaN	NaN	NaN	NaN	NaN	NaN	NaN	NaN	NaN	NaN	NaN	NaN	NaN	NaN	NaN	NaN	NaN	NaN	NaN	NaN	S	3			0.913363	0.00043698	183.71	139.92	160.84	0.16988	19183000	15845000	3338100	27
0.89343	0.49483	NaN	NaN	0.2632	NaN	0.43126	NaN	NaN	NaN	NaN	NaN	NaN	NaN	NaN	NaN	NaN	NaN	NaN	NaN	NaN	NaN	NaN	NaN	NaN	NaN	NaN	NaN	NaN	NaN	NaN	NaN	NaN	NaN	NaN	NaN	S	3			0.883352	0.000256126	190.82	137.32	152.94	-0.27597	30339000	20315000	10023000	28
0.975	0.73105	0.71677	0.64494	0.66442	0.65216	0.54291	0.79624	0.69896	0.51973	0.52579	0.55668	0.24931	0.2495	0.17796	0.18733	0.13229	0.10239	1.0902	0.77865	0.73403	0.6644	0.66588	0.67691	0.60093	0.55538	0.56484	0.59141	0.67899	0.47743	0.356	0.25645	0.20053	0.15734	0.15492	NaN	S	3			1	0.000577836	128.79	90.584	120.11	-0.29033	620080000	392310000	227770000	420
NaN	NaN	0.88016	0.68958	NaN	NaN	0.8098	NaN	NaN	NaN	0.75091	NaN	NaN	0.64951	NaN	NaN	NaN	NaN	NaN	NaN	NaN	NaN	NaN	0.75607	0.64619	0.59518	0.56128	0.52484	0.526	NaN	NaN	NaN	0.59606	NaN	NaN	NaN	S	2			0.969539	2.63668e-12	150.03	105.98	150.03	-0.062006	35404000	21204000	14199000	397
NaN	NaN	NaN	NaN	NaN	NaN	NaN	NaN	NaN	NaN	NaN	NaN	NaN	NaN	NaN	NaN	NaN	NaN	1.2395	0.59892	NaN	0.53825	0.46047	NaN	NaN	NaN	NaN	NaN	NaN	NaN	NaN	NaN	NaN	NaN	NaN	NaN	S	3			0.5	0.00266436	221.09	108.65	221.09	-0.44907	30257000	21544000	8712900	287
NaN	NaN	NaN	NaN	NaN	NaN	NaN	NaN	NaN	NaN	NaN	NaN	NaN	NaN	NaN	NaN	NaN	NaN	1.2395	0.59892	NaN	0.53825	0.46047	NaN	NaN	NaN	NaN	NaN	NaN	NaN	NaN	NaN	NaN	NaN	NaN	NaN	S	3			0.993355	0.00266436	221.09	108.65	176.48	-0.38714	47485000	38772000	8712900	288
NaN	NaN	NaN	NaN	NaN	NaN	NaN	NaN	NaN	NaN	NaN	NaN	NaN	NaN	NaN	NaN	NaN	NaN	1.2395	0.59892	NaN	0.53825	0.46047	NaN	NaN	NaN	NaN	NaN	NaN	NaN	NaN	NaN	NaN	NaN	NaN	NaN	S	3			1	0.00266436	221.09	108.65	205.31	0.33856	47485000	38772000	8712900	293
NaN	NaN	NaN	NaN	NaN	NaN	NaN	NaN	NaN	NaN	NaN	NaN	NaN	NaN	NaN	NaN	NaN	NaN	NaN	NaN	NaN	NaN	NaN	NaN	NaN	NaN	NaN	NaN	NaN	NaN	NaN	NaN	NaN	NaN	NaN	NaN	S	4			0.325985	3.54154e-05	48.85	35.935	48.85	0.58184	0	0	0	165
1.0336	NaN	NaN	NaN	NaN	NaN	NaN	NaN	1.0925	1.2946	NaN	NaN	NaN	NaN	NaN	NaN	NaN	NaN	NaN	NaN	1.2524	NaN	NaN	NaN	NaN	NaN	0.90432	NaN	NaN	NaN	NaN	NaN	NaN	NaN	NaN	NaN	S	4			0.654681	1.47971e-16	154.1	126.97	45.339	0.33133	254790000	167120000	87675000	171
1.0305	1.009	0.93257	0.86029	0.9357	1.0708	1.1394	1.0518	1.0844	1.2946	0.96463	0.66826	0.72847	0.5142	0.5158	0.43681	0.26851	0.32312	1.137	0.82967	1.2524	0.88577	0.74484	0.80546	0.98057	0.93206	0.90432	0.81314	1.024	0.81571	0.65903	0.62672	0.46279	0.37982	0.39786	0.34005	S	2			0.999224	2.66464e-69	222.69	196.14	222.69	0.16971	1398100000	787510000	610570000	173
NaN	NaN	NaN	NaN	NaN	NaN	NaN	NaN	NaN	NaN	NaN	NaN	NaN	NaN	NaN	NaN	NaN	NaN	NaN	NaN	NaN	NaN	NaN	NaN	NaN	NaN	NaN	NaN	NaN	NaN	NaN	NaN	NaN	NaN	NaN	NaN	S	4			0.434745	0.00176291	44.529	29.73	44.529	-0.8567	0	0	0	180
NaN	NaN	NaN	NaN	NaN	NaN	NaN	NaN	NaN	NaN	NaN	NaN	NaN	NaN	NaN	NaN	NaN	NaN	NaN	NaN	NaN	NaN	NaN	NaN	NaN	NaN	NaN	NaN	NaN	NaN	NaN	NaN	NaN	NaN	NaN	NaN	S	4			0.322909	3.7441e-07	53.493	41.029	53.493	-0.090479	0	0	0	184
NaN	NaN	NaN	NaN	NaN	NaN	NaN	NaN	NaN	NaN	NaN	NaN	NaN	NaN	NaN	NaN	NaN	NaN	NaN	NaN	NaN	NaN	NaN	NaN	NaN	NaN	NaN	NaN	NaN	NaN	NaN	NaN	NaN	NaN	NaN	NaN	S	4			0.322909	3.7441e-07	53.493	41.029	53.493	-0.090479	0	0	0	185
NaN	NaN	NaN	NaN	NaN	NaN	NaN	NaN	NaN	NaN	NaN	NaN	NaN	NaN	NaN	NaN	NaN	NaN	NaN	NaN	NaN	NaN	NaN	NaN	NaN	NaN	NaN	NaN	NaN	NaN	NaN	NaN	NaN	NaN	NaN	NaN	S	4			0.427157	4.53511e-06	65.801	45.976	44.529	-0.8567	0	0	0	190
NaN	NaN	NaN	NaN	NaN	NaN	NaN	NaN	NaN	NaN	NaN	NaN	NaN	NaN	NaN	NaN	NaN	NaN	NaN	NaN	NaN	NaN	NaN	NaN	NaN	NaN	NaN	NaN	NaN	NaN	NaN	NaN	NaN	NaN	NaN	NaN	S	4			0.561389	4.53511e-06	65.801	45.976	41.89	0.0044411	55843000	54015000	1828300	191
NaN	NaN	NaN	NaN	NaN	NaN	NaN	NaN	NaN	NaN	NaN	NaN	NaN	NaN	NaN	NaN	NaN	NaN	NaN	NaN	NaN	NaN	NaN	NaN	NaN	NaN	NaN	NaN	NaN	NaN	NaN	NaN	NaN	NaN	NaN	NaN	S	3			0.434403	1.22255e-06	99.549	78.306	99.549	-0.14064	0	0	0	2
NaN	NaN	NaN	NaN	NaN	NaN	NaN	NaN	NaN	NaN	NaN	NaN	NaN	NaN	NaN	NaN	NaN	NaN	NaN	NaN	NaN	NaN	NaN	NaN	NaN	NaN	NaN	NaN	NaN	NaN	NaN	NaN	NaN	NaN	NaN	NaN	S	3			0.977152	4.83627e-06	79.845	61.221	50.803	-0.02924	159360000	159360000	0	7
NaN	NaN	NaN	NaN	NaN	NaN	NaN	NaN	NaN	NaN	NaN	NaN	NaN	NaN	NaN	NaN	NaN	NaN	NaN	0.788	NaN	NaN	NaN	NaN	NaN	NaN	NaN	NaN	NaN	NaN	NaN	NaN	NaN	NaN	NaN	NaN	S	3			0.937226	0.000466641	197.73	154.23	197.73	-0.55123	8073000	3765200	4307800	194
1.2141	0.98733	0.89822	0.87127	0.7102	0.90807	0.86505	0.89558	0.89557	1.0262	0.66148	0.48253	0.46991	0.32588	0.39038	0.33124	NaN	NaN	1.1243	0.7591	1.0499	0.81382	0.69342	0.74034	0.85723	NaN	1.0572	0.66894	0.76193	0.60471	0.34651	NaN	NaN	0.2844	0.29107	NaN	S	3			0.998282	0.000466641	190.73	162	169.12	-0.014734	1038100000	578570000	459550000	195
NaN	NaN	NaN	NaN	NaN	NaN	NaN	NaN	NaN	NaN	NaN	NaN	NaN	NaN	NaN	NaN	NaN	NaN	NaN	NaN	NaN	NaN	NaN	NaN	NaN	NaN	NaN	NaN	NaN	NaN	NaN	NaN	NaN	NaN	NaN	NaN	S	3			0.415983	0.000580533	56.854	36.164	47.286	0.79317	0	0	0	198
NaN	NaN	0.52959	NaN	NaN	NaN	NaN	NaN	0.60154	NaN	NaN	0.40876	NaN	0.21007	0.060432	NaN	0.3837	NaN	NaN	0.71923	NaN	NaN	0.76693	0.8385	NaN	0.28142	NaN	NaN	0.41294	NaN	NaN	NaN	NaN	NaN	NaN	NaN	S	2			0.801022	9.09915e-05	191.06	154.64	80.412	-0.14268	256620000	193170000	63444000	134
1.1586	0.41365	0.46043	0.57975	0.70254	0.41386	0.25163	0.90887	0.67456	NaN	0.46484	0.4916	NaN	0.21007	0.060432	0.12301	0.33584	0.12407	1.3181	0.875	NaN	0.39211	1.1308	0.92698	0.59552	0.38586	0.34788	0.36867	0.49888	0.25324	0.28196	NaN	0.22406	0.20556	NaN	0.19327	S	3			0.999989	4.80455e-05	233.14	189.23	205.59	0.033461	2462500000	1708400000	754040000	136
NaN	NaN	NaN	NaN	NaN	NaN	NaN	NaN	NaN	NaN	NaN	NaN	NaN	NaN	NaN	NaN	NaN	NaN	NaN	NaN	NaN	NaN	NaN	NaN	NaN	NaN	NaN	NaN	NaN	NaN	NaN	NaN	NaN	NaN	NaN	NaN	S	3			0.722053	0.0034186	54.521	34.807	54.521	1.587	2177100	2177100	0	274
NaN	NaN	NaN	NaN	NaN	NaN	NaN	NaN	NaN	NaN	NaN	NaN	NaN	NaN	NaN	NaN	NaN	NaN	NaN	NaN	1.8829	NaN	NaN	NaN	NaN	NaN	NaN	NaN	NaN	NaN	NaN	NaN	NaN	NaN	NaN	NaN	S	3			0.993605	0.00278194	151.26	118.84	151.26	-0.71963	11159000	5934300	5224300	275
NaN	NaN	NaN	NaN	NaN	NaN	NaN	NaN	NaN	NaN	NaN	NaN	NaN	NaN	NaN	NaN	NaN	NaN	NaN	NaN	1.8829	NaN	NaN	NaN	NaN	NaN	NaN	NaN	NaN	NaN	NaN	NaN	NaN	NaN	NaN	NaN	S	3			0.999999	0.00278194	151.26	118.84	151.26	-0.71963	13336000	8111400	5224300	279
NaN	NaN	NaN	NaN	NaN	NaN	NaN	NaN	NaN	NaN	NaN	NaN	NaN	NaN	NaN	NaN	NaN	NaN	NaN	NaN	NaN	NaN	NaN	NaN	NaN	NaN	NaN	NaN	NaN	NaN	NaN	NaN	NaN	NaN	NaN	NaN	S	3			0.462117	0.0034186	54.521	34.807	54.521	1.587	0	0	0	284
NaN	NaN	NaN	NaN	NaN	NaN	NaN	NaN	NaN	NaN	NaN	NaN	NaN	NaN	NaN	NaN	NaN	NaN	NaN	NaN	NaN	NaN	NaN	NaN	NaN	NaN	NaN	NaN	NaN	NaN	NaN	NaN	NaN	NaN	NaN	NaN	S	3			0.881994	0.0034186	54.521	34.807	54.521	1.587	2177100	2177100	0	289
1.008	NaN	0.64837	0.66013	0.71937	0.64974	NaN	0.78945	0.66511	0.57457	0.53808	0.50595	0.45099	0.40643	0.35979	0.30494	NaN	0.23471	1.0965	0.70958	0.63627	0.63846	0.59121	0.54198	0.58201	0.55537	0.53513	0.5594	0.59308	0.47221	0.47812	0.41753	NaN	0.31484	0.30775	0.29179	S	3			0.99995	9.4141e-06	82.609	82.609	77.031	-0.14333	3000000000	1899900000	1100100000	377
0.97084	NaN	NaN	NaN	NaN	NaN	NaN	NaN	NaN	NaN	NaN	NaN	NaN	NaN	NaN	NaN	NaN	NaN	0.65494	0.55278	0.62795	0.77778	0.58145	NaN	0.58201	NaN	NaN	1.433	1.2353	1.3252	1.7483	NaN	0.35559	NaN	2.5622	NaN	S	3			0.834798	9.4141e-06	82.609	82.609	47.688	-0.038939	854990000	500860000	354120000	385
1.0465	NaN	0.64837	0.66013	NaN	0.64974	NaN	NaN	NaN	NaN	0.53808	0.50595	0.45099	0.40643	NaN	NaN	NaN	NaN	1.0965	0.70893	0.64471	0.65338	0.60114	1.2814	1.4047	1.3792	1.5174	NaN	1.8727	NaN	NaN	NaN	2.7353	2.7914	NaN	0.29179	S	3			0.904476	9.4141e-06	82.609	82.609	62.468	0.21877	1203400000	730350000	473020000	386
NaN	NaN	NaN	NaN	NaN	NaN	NaN	NaN	NaN	NaN	NaN	NaN	NaN	NaN	NaN	NaN	NaN	NaN	NaN	NaN	NaN	NaN	NaN	NaN	NaN	NaN	NaN	NaN	NaN	NaN	NaN	NaN	NaN	NaN	NaN	NaN	S	2			0.999029	2.51268e-10	141.79	100.17	110.16	-0.18384	232960000	0	232960000	805
NaN	NaN	NaN	NaN	NaN	NaN	NaN	NaN	NaN	NaN	NaN	NaN	NaN	NaN	NaN	NaN	NaN	NaN	NaN	NaN	NaN	NaN	NaN	NaN	NaN	NaN	NaN	NaN	NaN	NaN	NaN	NaN	NaN	NaN	NaN	NaN	S	2			0.898145	0.00124973	87.352	61.987	87.352	-0.30269	7604600	0	7604600	811
NaN	0.83411	NaN	NaN	NaN	NaN	NaN	NaN	NaN	NaN	NaN	NaN	NaN	NaN	NaN	NaN	NaN	NaN	NaN	NaN	NaN	NaN	NaN	NaN	NaN	NaN	0.57641	0.78027	NaN	NaN	NaN	NaN	NaN	NaN	NaN	NaN	S	3			0.784689	3.55198e-05	77.899	48.296	77.037	0.58283	50139000	33535000	16604000	913
NaN	NaN	NaN	NaN	1.0298	NaN	NaN	NaN	NaN	NaN	NaN	NaN	NaN	0.77925	NaN	NaN	NaN	NaN	NaN	NaN	NaN	NaN	NaN	NaN	NaN	NaN	NaN	NaN	NaN	NaN	NaN	NaN	NaN	NaN	NaN	NaN	S	3			0.795906	0.00284584	43.732	30.069	42.73	0.21825	51681000	27404000	24277000	868
NaN	NaN	NaN	NaN	NaN	NaN	NaN	NaN	NaN	NaN	NaN	NaN	NaN	NaN	NaN	NaN	NaN	NaN	NaN	NaN	NaN	NaN	NaN	NaN	NaN	NaN	NaN	NaN	NaN	NaN	NaN	NaN	NaN	NaN	NaN	NaN	S	3			0.471684	0.00284584	43.732	30.069	40.492	-0.2732	0	0	0	870
NaN	NaN	NaN	NaN	NaN	NaN	NaN	NaN	NaN	NaN	NaN	NaN	NaN	NaN	NaN	NaN	NaN	NaN	NaN	NaN	1.2529	NaN	NaN	NaN	NaN	NaN	NaN	NaN	NaN	NaN	NaN	NaN	NaN	NaN	NaN	NaN	S	3			1	3.39679e-05	291.2	252.01	291.2	0.658	49709000	18462000	31247000	639
1.0633	0.64488	0.59599	0.69191	0.70882	0.76312	0.55245	0.90591	0.70761	0.46062	0.56463	0.62239	0.48534	0.46068	0.3129	0.29486	0.28023	0.19213	1.0188	0.79214	0.55178	0.6164	0.7126	0.76232	0.6963	0.65019	0.6576	NaN	0.7851	0.53899	0.54887	0.4217	0.40232	0.33643	0.30549	0.30335	S	3			0.999963	0.000845725	261.45	221.72	261.45	0.30765	1114800000	686260000	428580000	715
NaN	NaN	NaN	NaN	NaN	NaN	NaN	NaN	NaN	NaN	0.55958	NaN	NaN	0.49981	NaN	NaN	NaN	NaN	1.064	NaN	NaN	0.68628	NaN	NaN	NaN	NaN	NaN	NaN	NaN	NaN	NaN	0.40791	NaN	NaN	NaN	NaN	S	3			0.5	0.00117546	196.37	156.49	166.79	-0.48363	114520000	68493000	46028000	717
NaN	NaN	0.7027	NaN	NaN	NaN	NaN	NaN	NaN	NaN	NaN	NaN	NaN	NaN	NaN	NaN	NaN	NaN	NaN	NaN	NaN	NaN	NaN	NaN	0.35725	0.33329	NaN	NaN	NaN	NaN	NaN	0.051164	NaN	NaN	NaN	NaN	S	3			0.846015	0.000516241	170.35	138.05	141.71	-0.15662	88569000	69920000	18649000	830
0.83407	NaN	0.51307	0.45129	NaN	0.70181	0.58956	NaN	0.53159	0.79146	0.53337	NaN	NaN	NaN	NaN	NaN	NaN	NaN	NaN	NaN	0.65655	NaN	0.67045	NaN	NaN	NaN	NaN	NaN	NaN	NaN	NaN	NaN	NaN	NaN	NaN	NaN	S	3			1	0.000684567	177.71	126.65	163.15	0.46879	87677000	59286000	28391000	631
NaN	NaN	NaN	0.43446	NaN	0.52067	NaN	0.35543	0.49996	0.36282	NaN	NaN	0.3327	NaN	NaN	NaN	NaN	NaN	1.1842	0.56793	NaN	NaN	NaN	NaN	NaN	NaN	NaN	NaN	NaN	NaN	NaN	NaN	NaN	NaN	NaN	NaN	S	3			0.982395	0.00266436	171.92	129.12	107.34	-0.76968	125340000	82207000	43129000	105
1.0236	0.4817	0.32906	0.43446	NaN	NaN	0.4205	0.35543	0.49996	0.36282	1.0578	NaN	0.3327	NaN	NaN	NaN	NaN	NaN	1.1842	0.56793	NaN	NaN	NaN	NaN	NaN	NaN	NaN	NaN	NaN	NaN	0.21879	0.10144	NaN	NaN	NaN	NaN	S	3			0.993631	0.00331451	205.26	146.94	154.15	0.081636	246730000	166340000	80396000	107
1.0236	0.4817	0.32906	0.43446	0.4928	0.52067	0.4205	0.35543	0.49996	0.36282	1.0578	NaN	0.3327	NaN	NaN	NaN	NaN	NaN	1.1842	0.56793	NaN	NaN	NaN	NaN	NaN	NaN	NaN	NaN	NaN	NaN	0.21879	0.10144	NaN	NaN	NaN	NaN	S	3			0.999929	0.00266436	205.26	146.94	154.15	0.081636	280530000	191830000	88702000	108
NaN	NaN	NaN	NaN	NaN	NaN	NaN	NaN	NaN	NaN	NaN	NaN	NaN	NaN	NaN	NaN	NaN	NaN	NaN	NaN	NaN	NaN	NaN	NaN	NaN	NaN	NaN	NaN	NaN	NaN	NaN	NaN	NaN	NaN	NaN	NaN	S	3			0.499832	0.000791227	116.52	57.168	116.52	-0.032876	0	0	0	613
1.0209	0.7116	0.80776	0.85258	1.0294	0.8889	0.6339	1.0916	0.71024	0.77149	0.71723	0.80264	0.71762	NaN	0.87273	0.86427	NaN	0.7872	NaN	NaN	NaN	NaN	NaN	NaN	NaN	NaN	NaN	NaN	NaN	NaN	NaN	NaN	NaN	NaN	NaN	NaN	S	2			0.998053	0.000445295	87.647	68.191	87.647	-0.26506	59205000	32902000	26303000	464
NaN	NaN	NaN	NaN	NaN	NaN	NaN	NaN	NaN	NaN	NaN	NaN	NaN	NaN	NaN	NaN	NaN	NaN	NaN	NaN	NaN	NaN	NaN	0.6684	0.39941	NaN	NaN	NaN	NaN	NaN	NaN	NaN	0.287	NaN	NaN	NaN	S	2			0.929374	0.000709601	86.756	67.557	58.268	0.1103	12080000	9375400	2705000	37
1.0277	0.81285	0.6087	0.5674	0.65736	0.63267	0.42876	0.63865	0.39089	0.31238	0.26573	NaN	0.10422	0.11769	0.099359	0.086161	0.068244	0.076645	1.0234	0.70486	0.57107	0.62669	0.56836	0.61904	0.69781	0.61788	0.55538	0.53873	0.77116	0.45553	0.5004	0.46077	0.36518	0.37519	0.3748	0.34858	S	2			1	1.80862e-07	132.01	90.562	102.64	-0.14153	1141400000	734360000	407030000	165
NaN	NaN	NaN	NaN	NaN	NaN	NaN	NaN	NaN	NaN	NaN	NaN	NaN	NaN	NaN	NaN	NaN	NaN	NaN	NaN	NaN	NaN	NaN	NaN	NaN	NaN	NaN	NaN	NaN	NaN	NaN	NaN	NaN	0.5228	NaN	NaN	S	3			0.999887	0.00202744	212.03	174.39	212.03	0.16606	2625200	1649000	976210	145
1.0883	0.71724	0.82825	0.80742	0.7774	0.72163	0.70573	0.83027	0.95982	0.64069	0.68244	0.8277	0.80281	0.81901	0.8294	0.741	0.63446	0.51238	1.1045	0.7862	0.61899	0.66165	0.76197	0.63497	0.68658	0.69681	0.69041	0.59425	0.78759	0.65472	0.85156	0.68195	0.74342	0.7678	0.7384	0.69076	S	3			1	0.000317591	239.75	177.65	200	-0.08823	576490000	319270000	257220000	20
[truncated: 14,786 more rows]
[truncated: 10 more columns]

## Sheet: Filtered IDs and replace values
Ratio H/L DMSO 00 min	Ratio H/L DMSO 01 min	Ratio H/L DMSO 02 min	Ratio H/L DMSO 03 min	Ratio H/L DMSO 04 min	Ratio H/L DMSO 05 min	Ratio H/L DMSO 06 min	Ratio H/L DMSO 07 min	Ratio H/L DMSO 08 min	Ratio H/L DMSO 09 min	Ratio H/L DMSO 10 min	Ratio H/L DMSO 15 min	Ratio H/L DMSO 20 min	Ratio H/L DMSO 25 min	Ratio H/L DMSO 30 min	Ratio H/L DMSO 40 min	Ratio H/L DMSO 50 min	Ratio H/L DMSO 60 min	Ratio H/L APC/Ci 00 min	Ratio H/L APC/Ci 01 min	Ratio H/L APC/Ci 02 min	Ratio H/L APC/Ci 03 min	Ratio H/L APC/Ci 04 min	Ratio H/L APC/Ci 05 min	Ratio H/L APC/Ci 06 min	Ratio H/L APC/Ci 07 min	Ratio H/L APC/Ci 08 min	Ratio H/L APC/Ci 09 min	Ratio H/L APC/Ci 10 min	Ratio H/L APC/Ci 15 min	Ratio H/L APC/Ci 20 min	Ratio H/L APC/Ci 25 min	Ratio H/L APC/Ci 30 min	Ratio H/L APC/Ci 40 min	Ratio H/L APC/Ci 50 min	Ratio H/L APC/Ci 60 min	Ratio H/L Mix_D0H_A0L	Ratio H/L Mix_A0H_D0L	C: Amino acid	C: Charge	N: Localization prob	N: PEP	N: Score	N: Delta score	N: Score for localization	N: Mass error [ppm]	N: Intensity	N: Intensity L	N: Intensity H	N: Position
[truncated: 11,585 more rows]
[truncated: 10 more columns]

[truncated: 3 more sheets: Cross-mixed Data, Clustered Output, Control vs APCCi Half-lives]
