# Supplementary material for: Ordered dephosphorylation initiated by the selective proteolysis of cyclin B drives mitotic exit
Source: eLife. 2020 Sep 1;9:e59885. doi: 10.7554/eLife.59885 (PMC7529458; doi:10.7554/eLife.59885)
Supplement: Figure 7—source data 1. [file elife-59885-fig7-data1.xlsx]

## Sheet: siPP1 Phospho-proteome MS data
Ratio H/L siControl 00 min	Ratio H/L siControl 01 min	Ratio H/L siControl 02 min	Ratio H/L siControl 03 min	Ratio H/L siControl 04 min	Ratio H/L siControl 05 min	Ratio H/L siControl 06 min	Ratio H/L siControl 07 min	Ratio H/L siControl 08 min	Ratio H/L siControl 09 min	Ratio H/L siControl 10 min	Ratio H/L siControl 15 min	Ratio H/L siControl 20 min	Ratio H/L siControl 25 min	Ratio H/L siControl 30 min	Ratio H/L siControl 40 min	Ratio H/L siControl 50 min	Ratio H/L siControl 60 min	Ratio H/L siPPP1CA/C 00 min	Ratio H/L siPPP1CA/C 01 min	Ratio H/L siPPP1CA/C 02 min	Ratio H/L siPPP1CA/C 03 min	Ratio H/L siPPP1CA/C 04 min	Ratio H/L siPPP1CA/C 05 min	Ratio H/L siPPP1CA/C 06 min	Ratio H/L siPPP1CA/C 07 min	Ratio H/L siPPP1CA/C 08 min	Ratio H/L siPPP1CA/C 09 min	Ratio H/L siPPP1CA/C 10 min	Ratio H/L siPPP1CA/C 15 min	Ratio H/L siPPP1CA/C 20 min	Ratio H/L siPPP1CA/C 25 min	Ratio H/L siPPP1CA/C 30 min	Ratio H/L siPPP1CA/C 40 min	Ratio H/L siPPP1CA/C 50 min	Ratio H/L siPPP1CA/C 60 min	Ratio H/L siPPP1CB 00 min	Ratio H/L siPPP1CB 01 min	Ratio H/L siPPP1CB 02 min	Ratio H/L siPPP1CB 03 min	Ratio H/L siPPP1CB 04 min	Ratio H/L siPPP1CB 05 min	Ratio H/L siPPP1CB 06 min	Ratio H/L siPPP1CB 07 min	Ratio H/L siPPP1CB 08 min	Ratio H/L siPPP1CB 09 min	Ratio H/L siPPP1CB 10 min	Ratio H/L siPPP1CB 15 min	Ratio H/L siPPP1CB 20 min	Ratio H/L siPPP1CB 25 min
NaN	NaN	NaN	NaN	NaN	NaN	NaN	NaN	NaN	NaN	NaN	NaN	NaN	NaN	NaN	NaN	NaN	NaN	1.4623	NaN	NaN	NaN	NaN	NaN	NaN	NaN	NaN	NaN	NaN	NaN	NaN	NaN	NaN	NaN	NaN	NaN	NaN	NaN	NaN	NaN	NaN	NaN	NaN	NaN	NaN	NaN	NaN	NaN	NaN	NaN
1.0242	1.1425	0.92522	0.93592	0.87747	0.9626	0.67758	0.78542	0.56022	0.45359	0.51959	0.56345	0.33234	0.27342	NaN	NaN	NaN	NaN	0.91414	1.986	1.3713	0.85589	2.2766	2.1621	1.8197	1.9299	1.5697	1.534	0.94303	0.86249	0.92042	0.45865	0.43994	NaN	NaN	NaN	0.95655	1.1176	NaN	0.90869	0.99211	0.87066	0.61695	0.85335	0.97396	0.5347	0.57772	NaN	0.44411	0.25599
1.0506	1.4139	0.92719	0.96667	1.1114	1.1878	0.98121	1.195	0.88681	0.74933	0.93438	0.90778	0.65554	0.54966	0.25842	0.16069	0.27198	0.076682	1.3866	1.9282	1.2673	1.073	2.1631	2.2592	1.8051	1.8402	1.9834	1.9377	1.4656	1.9002	1.6492	1.3011	0.97255	0.54024	0.22257	0.24395	1.0804	1.2731	0.87156	1.019	1.227	1.1044	0.94151	0.93832	1.0605	0.78801	1.2235	0.97236	0.71421	0.71264
1.1146	1.0319	0.47266	NaN	0.98049	0.86107	0.66148	0.72161	0.19873	0.3302	0.67218	0.87952	0.67403	NaN	NaN	NaN	NaN	NaN	1.3086	0.57593	0.81931	NaN	NaN	0.53062	0.57477	1.1729	0.89159	1.0085	0.56199	1.0298	1.7463	0.71417	0.32076	NaN	NaN	NaN	0.96491	NaN	NaN	NaN	1.1899	0.59153	NaN	NaN	NaN	NaN	1.2224	0.95734	0.69378	NaN
0.89708	1.2268	0.96744	0.87256	1.0015	0.81428	0.73698	0.80505	0.7128	0.82307	0.6307	0.73196	1.1623	1.0524	1.0268	0.57115	0.63737	0.32618	1.1173	1.0548	0.67727	1.3086	1.8494	2.1075	NaN	1.0898	1.6456	1.5072	1.6403	1.5567	1.9983	NaN	2.3278	2.3653	1.4004	1.4417	0.84539	NaN	1.4015	0.91493	0.84919	1.1806	1.0579	0.91641	0.95788	0.9818	1.2964	1.678	1.2711	1.8345
NaN	NaN	NaN	NaN	NaN	NaN	NaN	NaN	NaN	NaN	NaN	NaN	NaN	NaN	NaN	NaN	NaN	NaN	NaN	NaN	0.94415	0.54764	NaN	NaN	NaN	NaN	NaN	NaN	NaN	NaN	NaN	NaN	NaN	NaN	NaN	NaN	NaN	NaN	0.56859	NaN	NaN	NaN	NaN	NaN	NaN	NaN	NaN	NaN	NaN	NaN
NaN	NaN	NaN	NaN	NaN	NaN	NaN	NaN	NaN	NaN	NaN	NaN	NaN	NaN	NaN	NaN	NaN	NaN	NaN	NaN	NaN	NaN	NaN	NaN	NaN	NaN	NaN	NaN	NaN	NaN	NaN	NaN	NaN	NaN	NaN	NaN	NaN	NaN	NaN	NaN	NaN	NaN	NaN	NaN	NaN	NaN	NaN	NaN	NaN	NaN
NaN	NaN	NaN	NaN	NaN	NaN	NaN	NaN	NaN	NaN	NaN	NaN	NaN	NaN	NaN	NaN	NaN	NaN	NaN	NaN	NaN	NaN	NaN	NaN	NaN	NaN	NaN	NaN	NaN	NaN	NaN	NaN	NaN	NaN	NaN	NaN	NaN	0.60913	NaN	NaN	NaN	NaN	NaN	NaN	NaN	NaN	NaN	NaN	NaN	1.0835
0.965	0.98436	1.0463	0.67198	0.94193	0.89224	0.83317	0.58215	0.31095	0.23986	0.21461	NaN	NaN	NaN	NaN	NaN	NaN	0.26129	1.1103	1.1345	1.5637	1.539	1.2127	1.2766	1.5535	1.4617	1.1583	1.4156	1.158	0.46269	NaN	NaN	NaN	NaN	NaN	NaN	0.88116	1.0948	1.0065	0.95531	0.82057	0.8213	0.77405	0.57803	0.5875	0.29443	0.19297	0.86468	NaN	0.68215
0.86323	0.68616	0.62443	0.4591	NaN	0.83413	0.69908	0.74796	NaN	0.56314	NaN	0.66181	0.6203	0.62231	NaN	NaN	NaN	NaN	1.2106	NaN	NaN	1.3188	NaN	1.3256	1.2508	1.2549	1.3502	1.1192	0.98215	NaN	NaN	NaN	NaN	NaN	NaN	NaN	1.0442	NaN	0.97007	0.94316	0.85379	NaN	0.81872	NaN	0.45254	NaN	NaN	0.96929	0.80901	NaN
NaN	NaN	NaN	NaN	NaN	NaN	NaN	NaN	NaN	NaN	NaN	NaN	NaN	NaN	NaN	NaN	NaN	NaN	NaN	NaN	NaN	NaN	NaN	NaN	NaN	NaN	NaN	NaN	NaN	NaN	NaN	NaN	NaN	NaN	NaN	NaN	NaN	NaN	NaN	NaN	NaN	NaN	NaN	NaN	NaN	NaN	NaN	0.99314	NaN	NaN
0.87273	NaN	NaN	NaN	NaN	NaN	0.79718	NaN	NaN	NaN	NaN	NaN	NaN	NaN	NaN	NaN	NaN	NaN	NaN	NaN	1.3179	NaN	1.7409	NaN	NaN	NaN	NaN	NaN	NaN	NaN	NaN	NaN	NaN	NaN	NaN	NaN	NaN	NaN	NaN	NaN	NaN	NaN	NaN	NaN	NaN	NaN	1.0666	NaN	NaN	NaN
1.1145	0.92905	0.90069	0.78518	0.91908	0.8843	NaN	0.90786	0.73456	0.81437	0.79936	0.84831	0.72271	0.77269	0.71361	0.38388	0.67166	0.24677	1.1607	1.5557	1.6134	1.3397	NaN	1.5684	1.4897	1.5165	1.5551	1.6306	1.6778	1.724	1.532	1.56	1.3154	1.3343	1.0326	0.88779	0.93926	1.0791	0.97598	0.95172	0.93662	0.98437	0.99852	0.86551	0.88174	0.80846	NaN	NaN	0.92838	1.0458
1.2291	0.94282	0.78817	0.91178	0.84583	0.78868	0.62911	0.80596	0.59909	0.48202	0.54339	NaN	NaN	NaN	NaN	NaN	0.067643	NaN	1.1892	1.8589	1.1035	0.67418	NaN	1.9541	1.3227	1.4131	1.3461	1.3983	0.91881	0.85221	0.51503	NaN	NaN	NaN	NaN	NaN	1.0436	NaN	0.97791	0.79047	0.96074	0.91622	0.83948	0.74096	0.53491	0.66875	0.56716	0.31243	NaN	NaN
NaN	NaN	NaN	NaN	NaN	NaN	NaN	NaN	NaN	NaN	NaN	NaN	NaN	NaN	NaN	NaN	NaN	NaN	NaN	NaN	NaN	NaN	NaN	NaN	NaN	NaN	NaN	NaN	NaN	NaN	NaN	NaN	NaN	NaN	NaN	NaN	NaN	NaN	NaN	NaN	NaN	NaN	NaN	NaN	NaN	NaN	NaN	NaN	NaN	NaN
NaN	NaN	NaN	NaN	NaN	NaN	NaN	NaN	NaN	NaN	NaN	NaN	NaN	NaN	NaN	NaN	NaN	NaN	NaN	NaN	NaN	NaN	NaN	NaN	NaN	NaN	NaN	NaN	NaN	NaN	NaN	NaN	NaN	NaN	NaN	NaN	NaN	NaN	NaN	NaN	NaN	NaN	NaN	NaN	NaN	NaN	NaN	NaN	NaN	NaN
NaN	NaN	NaN	NaN	NaN	NaN	NaN	NaN	NaN	NaN	NaN	NaN	NaN	NaN	NaN	NaN	NaN	NaN	NaN	NaN	NaN	NaN	NaN	NaN	NaN	NaN	NaN	NaN	NaN	NaN	NaN	NaN	NaN	NaN	NaN	NaN	NaN	NaN	NaN	NaN	NaN	NaN	NaN	NaN	NaN	NaN	NaN	NaN	NaN	NaN
NaN	NaN	NaN	NaN	NaN	NaN	NaN	NaN	NaN	NaN	NaN	NaN	NaN	NaN	NaN	NaN	NaN	NaN	NaN	NaN	NaN	NaN	NaN	NaN	NaN	NaN	NaN	NaN	NaN	NaN	NaN	NaN	NaN	NaN	NaN	NaN	NaN	NaN	NaN	NaN	NaN	NaN	NaN	NaN	NaN	NaN	NaN	NaN	NaN	NaN
NaN	0.9031	0.92555	NaN	0.646	NaN	0.61574	NaN	0.32068	0.36063	0.45078	NaN	NaN	NaN	NaN	NaN	NaN	NaN	0.88208	NaN	1.2239	NaN	NaN	1.0159	1.4983	1.1359	1.0357	1.3087	NaN	0.89391	NaN	NaN	NaN	NaN	NaN	NaN	NaN	0.94771	NaN	NaN	NaN	NaN	0.7931	NaN	NaN	0.68774	0.48947	NaN	NaN	NaN
NaN	1.4106	NaN	0.9643	NaN	0.93351	NaN	NaN	1.0239	0.97683	0.94124	NaN	NaN	0.95431	0.65139	0.51364	NaN	NaN	NaN	2.2378	NaN	NaN	2.5437	1.9975	2.1903	NaN	NaN	2.274	1.692	2.2846	NaN	2.2405	2.1935	NaN	NaN	NaN	NaN	NaN	NaN	NaN	NaN	1.0642	1.1596	1.3635	NaN	NaN	NaN	1.4489	NaN	1.4734
NaN	1.3517	NaN	NaN	NaN	0.87359	NaN	0.97166	0.85237	0.77657	0.73562	0.49493	0.79362	NaN	0.59114	NaN	0.71745	0.22692	NaN	NaN	NaN	NaN	NaN	NaN	NaN	NaN	NaN	NaN	NaN	NaN	1.9811	1.7758	2.1935	NaN	1.2923	NaN	NaN	NaN	NaN	1.3498	0.87094	NaN	NaN	NaN	NaN	NaN	NaN	NaN	NaN	NaN
0.98823	1.491	0.92562	1.524	0.93915	1.0195	0.82921	1.0154	0.98339	0.84102	0.76085	NaN	0.36506	0.25651	NaN	NaN	0.17186	NaN	1.2153	3.4968	1.3856	1.1604	3.0777	3.1259	2.5641	2.2642	2.5863	2.8798	1.8458	1.8603	0.98559	0.8009	0.68842	0.35164	NaN	0.17326	NaN	NaN	NaN	NaN	NaN	NaN	NaN	NaN	NaN	NaN	NaN	NaN	NaN	NaN
0.98823	1.491	0.92562	1.524	0.93915	1.0195	0.92157	1.2805	0.98339	0.8256	0.76085	NaN	0.36506	0.25651	NaN	NaN	0.17186	NaN	NaN	NaN	NaN	NaN	NaN	NaN	NaN	NaN	NaN	NaN	NaN	NaN	NaN	NaN	NaN	NaN	NaN	NaN	NaN	NaN	NaN	NaN	NaN	NaN	NaN	NaN	NaN	NaN	NaN	NaN	NaN	NaN
NaN	NaN	NaN	NaN	NaN	NaN	NaN	NaN	NaN	NaN	NaN	NaN	NaN	NaN	NaN	NaN	NaN	NaN	NaN	NaN	NaN	NaN	NaN	NaN	NaN	NaN	NaN	NaN	NaN	NaN	NaN	NaN	NaN	NaN	NaN	NaN	NaN	NaN	NaN	NaN	NaN	NaN	NaN	NaN	NaN	NaN	NaN	NaN	NaN	NaN
NaN	NaN	NaN	NaN	NaN	NaN	NaN	NaN	NaN	NaN	NaN	NaN	NaN	NaN	NaN	NaN	NaN	NaN	NaN	NaN	NaN	NaN	NaN	NaN	NaN	NaN	NaN	NaN	NaN	NaN	NaN	NaN	NaN	NaN	NaN	NaN	NaN	NaN	NaN	NaN	NaN	NaN	NaN	NaN	NaN	NaN	NaN	NaN	NaN	NaN
NaN	NaN	NaN	NaN	NaN	NaN	NaN	NaN	NaN	NaN	NaN	NaN	NaN	NaN	NaN	NaN	NaN	NaN	NaN	NaN	NaN	NaN	NaN	NaN	NaN	NaN	NaN	NaN	NaN	NaN	NaN	NaN	NaN	NaN	NaN	NaN	NaN	NaN	NaN	NaN	NaN	NaN	NaN	NaN	NaN	NaN	NaN	NaN	NaN	NaN
NaN	NaN	NaN	NaN	NaN	NaN	NaN	NaN	NaN	NaN	NaN	NaN	NaN	NaN	NaN	NaN	NaN	NaN	NaN	NaN	NaN	NaN	NaN	NaN	NaN	NaN	NaN	NaN	NaN	NaN	NaN	NaN	NaN	NaN	NaN	NaN	NaN	NaN	NaN	NaN	NaN	NaN	NaN	NaN	NaN	NaN	NaN	NaN	NaN	NaN
0.86472	1.0805	1.4105	1.3209	1.5084	1.3101	1.7555	1.7653	1.391	1.7286	1.3961	1.0438	NaN	NaN	NaN	NaN	NaN	NaN	NaN	NaN	NaN	NaN	NaN	NaN	NaN	NaN	NaN	NaN	NaN	NaN	NaN	NaN	NaN	NaN	NaN	NaN	NaN	NaN	NaN	NaN	NaN	NaN	NaN	NaN	NaN	NaN	NaN	NaN	NaN	NaN
0.86472	1.0805	1.4105	1.3209	1.5084	1.3101	1.7555	1.7653	1.391	1.7286	1.3961	1.0438	NaN	NaN	NaN	NaN	NaN	NaN	NaN	NaN	NaN	NaN	NaN	NaN	NaN	NaN	NaN	NaN	NaN	NaN	NaN	NaN	NaN	NaN	NaN	NaN	NaN	NaN	NaN	NaN	NaN	NaN	NaN	NaN	NaN	NaN	NaN	NaN	NaN	NaN
0.92622	1.0475	0.9337	0.70662	0.86259	1.0338	0.69918	0.84959	0.48405	0.6236	0.86472	0.72651	0.84871	0.9155	0.63979	0.52438	1.2292	0.62282	1.1222	1.5789	1.6888	1.5386	1.5091	1.3508	1.1746	1.6608	1.3428	1.2837	1.5489	1.8984	1.5973	1.4253	1.6048	1.5706	1.8548	1.4888	1.0931	0.94792	1.1179	0.96938	0.983	0.86535	1.1842	0.95581	0.80795	0.69851	1.164	1.2897	1.1239	1.2695
0.97095	1.3966	NaN	0.86178	1.4519	NaN	1.2639	1.1758	0.79827	0.84217	1.5104	1.7992	6.2843	1.3047	1.4857	NaN	NaN	1.2651	1.1333	0.7751	1.0957	0.79026	NaN	NaN	2.1026	2.3359	1.5907	1.9447	2.3945	2.0336	3.4242	2.2622	1.8067	NaN	2.1833	NaN	1.6069	1.3733	NaN	0.77555	NaN	1.0146	0.76529	0.65489	1.4149	1.0155	1.9359	1.2465	2.5313	1.8097
NaN	NaN	NaN	NaN	NaN	NaN	NaN	NaN	NaN	NaN	NaN	NaN	NaN	NaN	NaN	NaN	NaN	NaN	NaN	NaN	NaN	NaN	NaN	NaN	NaN	NaN	NaN	NaN	NaN	NaN	NaN	NaN	NaN	NaN	NaN	NaN	NaN	NaN	NaN	NaN	NaN	NaN	NaN	NaN	NaN	NaN	NaN	NaN	NaN	NaN
NaN	NaN	NaN	NaN	NaN	NaN	NaN	NaN	NaN	NaN	NaN	NaN	NaN	NaN	NaN	NaN	NaN	NaN	NaN	NaN	NaN	NaN	NaN	NaN	NaN	NaN	NaN	NaN	NaN	NaN	NaN	NaN	NaN	NaN	NaN	NaN	NaN	NaN	NaN	NaN	NaN	NaN	NaN	NaN	NaN	NaN	NaN	NaN	NaN	NaN
NaN	NaN	NaN	NaN	NaN	NaN	NaN	NaN	NaN	NaN	NaN	NaN	NaN	NaN	NaN	NaN	NaN	NaN	NaN	NaN	NaN	NaN	NaN	NaN	NaN	NaN	NaN	NaN	NaN	NaN	NaN	NaN	NaN	NaN	NaN	NaN	NaN	NaN	NaN	NaN	NaN	NaN	NaN	0.27122	NaN	NaN	NaN	NaN	NaN	NaN
NaN	NaN	NaN	NaN	NaN	NaN	NaN	NaN	NaN	NaN	NaN	NaN	NaN	NaN	NaN	NaN	NaN	NaN	NaN	NaN	NaN	NaN	NaN	NaN	NaN	NaN	NaN	NaN	NaN	NaN	NaN	NaN	NaN	NaN	NaN	NaN	NaN	NaN	NaN	NaN	NaN	NaN	NaN	0.27122	NaN	NaN	NaN	NaN	NaN	NaN
NaN	NaN	NaN	NaN	NaN	NaN	NaN	NaN	NaN	NaN	NaN	NaN	NaN	NaN	NaN	NaN	NaN	NaN	NaN	NaN	NaN	NaN	NaN	3.7949	1.6917	1.2142	NaN	1.9808	NaN	NaN	NaN	NaN	NaN	NaN	NaN	NaN	NaN	NaN	NaN	NaN	NaN	NaN	NaN	NaN	NaN	NaN	NaN	NaN	NaN	NaN
NaN	NaN	NaN	NaN	NaN	NaN	NaN	NaN	NaN	NaN	NaN	NaN	NaN	NaN	NaN	NaN	NaN	NaN	NaN	NaN	NaN	NaN	NaN	NaN	NaN	NaN	NaN	NaN	NaN	NaN	NaN	NaN	NaN	NaN	NaN	NaN	NaN	NaN	NaN	NaN	NaN	NaN	NaN	NaN	NaN	NaN	NaN	NaN	NaN	NaN
NaN	NaN	NaN	NaN	NaN	NaN	NaN	NaN	NaN	NaN	NaN	NaN	NaN	NaN	NaN	NaN	NaN	NaN	NaN	NaN	NaN	NaN	NaN	NaN	NaN	NaN	NaN	NaN	NaN	NaN	NaN	NaN	NaN	NaN	NaN	NaN	NaN	NaN	NaN	NaN	NaN	NaN	NaN	NaN	NaN	NaN	NaN	NaN	NaN	NaN
NaN	NaN	NaN	NaN	NaN	NaN	NaN	NaN	NaN	NaN	NaN	NaN	NaN	NaN	NaN	NaN	NaN	NaN	NaN	NaN	NaN	NaN	NaN	NaN	NaN	NaN	NaN	NaN	NaN	NaN	NaN	NaN	NaN	NaN	NaN	NaN	0.86416	NaN	NaN	NaN	NaN	NaN	1.0534	0.78485	NaN	NaN	0.55042	0.50046	NaN	NaN
NaN	NaN	NaN	NaN	NaN	NaN	NaN	NaN	NaN	NaN	NaN	NaN	NaN	NaN	NaN	NaN	NaN	NaN	NaN	NaN	NaN	NaN	NaN	NaN	NaN	NaN	NaN	NaN	NaN	NaN	NaN	NaN	NaN	NaN	NaN	NaN	NaN	NaN	NaN	NaN	NaN	NaN	NaN	NaN	NaN	NaN	NaN	NaN	NaN	NaN
0.76892	1.2278	0.66872	1.3055	0.67584	1.0512	0.98384	1.1056	0.74653	0.78859	0.84177	1.0512	0.77027	1.0699	0.70696	0.7133	1.1847	0.46698	1.0781	NaN	NaN	1.0988	NaN	2.1072	1.6349	2.0133	1.371	1.7266	2.0884	2.0168	1.8386	2.3809	2.1793	2.1639	1.3265	1.9111	1.0338	1.5161	1.1635	1.1269	1.0401	1.1439	0.88331	1.54	1.4604	1.0772	1.0639	1.3194	NaN	1.233
1.2848	1.4867	0.99829	NaN	1.0964	0.89306	NaN	0.72791	NaN	0.65092	NaN	NaN	0.72871	0.73739	NaN	NaN	NaN	NaN	NaN	NaN	NaN	NaN	NaN	NaN	NaN	NaN	NaN	NaN	NaN	NaN	NaN	NaN	NaN	NaN	NaN	NaN	NaN	NaN	NaN	NaN	NaN	NaN	NaN	NaN	NaN	NaN	NaN	NaN	NaN	NaN
1.0415	1.1742	0.78601	0.68522	0.89205	0.68547	0.63021	0.6968	0.45552	NaN	NaN	NaN	NaN	NaN	NaN	NaN	NaN	NaN	NaN	NaN	NaN	NaN	NaN	NaN	NaN	NaN	NaN	NaN	NaN	NaN	NaN	NaN	NaN	NaN	NaN	NaN	NaN	NaN	NaN	NaN	NaN	NaN	NaN	NaN	NaN	NaN	NaN	NaN	NaN	NaN
NaN	0.88318	NaN	1.0281	NaN	0.58206	NaN	NaN	NaN	NaN	NaN	NaN	NaN	NaN	NaN	NaN	NaN	NaN	NaN	2.9279	NaN	2.0259	NaN	2.1976	NaN	0.86159	NaN	NaN	NaN	NaN	NaN	NaN	NaN	NaN	0.53545	0.35361	NaN	NaN	NaN	1.2568	0.43702	NaN	NaN	NaN	NaN	NaN	NaN	NaN	NaN	NaN
1.1392	NaN	NaN	NaN	NaN	NaN	NaN	NaN	NaN	NaN	NaN	NaN	NaN	NaN	NaN	NaN	NaN	NaN	NaN	NaN	NaN	NaN	NaN	NaN	NaN	NaN	NaN	NaN	NaN	NaN	NaN	NaN	NaN	NaN	NaN	NaN	NaN	NaN	NaN	NaN	NaN	NaN	NaN	NaN	NaN	NaN	NaN	NaN	NaN	NaN
0.67403	0.81935	0.61666	0.55239	0.58729	NaN	0.36964	NaN	NaN	NaN	NaN	NaN	NaN	NaN	NaN	NaN	NaN	NaN	1.1315	1.1883	1.8079	0.59088	NaN	0.80247	0.38292	NaN	NaN	NaN	NaN	NaN	NaN	NaN	NaN	NaN	NaN	NaN	NaN	NaN	NaN	NaN	NaN	NaN	NaN	NaN	NaN	NaN	NaN	NaN	NaN	NaN
1.0696	1.2034	NaN	NaN	0.65334	0.5974	0.14831	NaN	NaN	NaN	NaN	NaN	NaN	0.36727	NaN	NaN	NaN	NaN	NaN	NaN	NaN	NaN	1.7774	NaN	NaN	1.1044	1.1487	NaN	NaN	NaN	NaN	NaN	NaN	NaN	NaN	NaN	NaN	NaN	NaN	1.0571	NaN	NaN	NaN	NaN	NaN	0.26565	NaN	NaN	NaN	NaN
NaN	NaN	NaN	NaN	NaN	NaN	NaN	NaN	NaN	NaN	NaN	NaN	NaN	NaN	NaN	NaN	NaN	NaN	NaN	NaN	NaN	NaN	NaN	NaN	NaN	NaN	NaN	NaN	NaN	NaN	NaN	NaN	NaN	NaN	NaN	NaN	NaN	NaN	NaN	NaN	NaN	NaN	NaN	NaN	NaN	NaN	NaN	NaN	NaN	NaN
NaN	NaN	NaN	NaN	NaN	NaN	NaN	NaN	NaN	NaN	NaN	NaN	NaN	NaN	NaN	NaN	NaN	0.067605	NaN	NaN	NaN	NaN	NaN	NaN	NaN	NaN	NaN	NaN	NaN	NaN	NaN	NaN	NaN	NaN	NaN	NaN	NaN	NaN	NaN	NaN	NaN	NaN	NaN	NaN	NaN	NaN	NaN	NaN	NaN	NaN
1.0201	NaN	NaN	NaN	NaN	NaN	NaN	NaN	NaN	NaN	NaN	NaN	NaN	NaN	NaN	NaN	NaN	NaN	NaN	NaN	NaN	NaN	NaN	NaN	NaN	NaN	NaN	NaN	NaN	NaN	NaN	NaN	NaN	NaN	NaN	NaN	1.0849	NaN	NaN	NaN	NaN	NaN	NaN	NaN	NaN	NaN	NaN	NaN	NaN	NaN
NaN	NaN	NaN	NaN	0.80029	NaN	NaN	NaN	NaN	NaN	NaN	NaN	NaN	NaN	NaN	NaN	NaN	NaN	NaN	NaN	1.3232	NaN	NaN	NaN	NaN	NaN	NaN	1.3153	NaN	0.77894	NaN	NaN	0.37284	NaN	0.19358	NaN	NaN	NaN	NaN	0.90472	1.0385	NaN	0.66868	NaN	0.58422	NaN	NaN	NaN	NaN	NaN
NaN	NaN	NaN	NaN	NaN	0.89266	NaN	NaN	NaN	NaN	NaN	NaN	NaN	NaN	0.13581	NaN	NaN	NaN	NaN	NaN	NaN	NaN	1.6207	NaN	1.3365	NaN	NaN	NaN	NaN	NaN	NaN	NaN	NaN	NaN	NaN	0.18378	NaN	NaN	NaN	NaN	NaN	NaN	NaN	NaN	NaN	NaN	NaN	NaN	NaN	NaN
NaN	NaN	NaN	NaN	NaN	NaN	NaN	NaN	NaN	NaN	NaN	NaN	NaN	NaN	NaN	NaN	NaN	NaN	NaN	NaN	NaN	NaN	NaN	NaN	NaN	NaN	NaN	NaN	NaN	NaN	NaN	NaN	NaN	NaN	NaN	NaN	NaN	NaN	NaN	NaN	NaN	NaN	NaN	NaN	NaN	NaN	NaN	NaN	NaN	NaN
0.92766	0.84733	NaN	NaN	NaN	0.54246	NaN	0.50236	0.23321	NaN	NaN	0.59198	NaN	NaN	NaN	NaN	NaN	NaN	NaN	0.5368	1.1963	NaN	NaN	0.73485	NaN	1.0971	0.9258	0.89518	NaN	NaN	NaN	NaN	0.49986	NaN	0.23421	0.23667	NaN	NaN	NaN	NaN	NaN	NaN	NaN	NaN	NaN	NaN	NaN	0.53427	NaN	NaN
NaN	NaN	NaN	NaN	NaN	NaN	NaN	NaN	NaN	NaN	NaN	NaN	NaN	NaN	NaN	NaN	NaN	NaN	NaN	NaN	NaN	NaN	NaN	NaN	NaN	NaN	NaN	NaN	NaN	0.94777	0.85152	NaN	NaN	NaN	NaN	NaN	NaN	0.56297	NaN	NaN	NaN	NaN	0.43343	NaN	NaN	NaN	NaN	NaN	NaN	NaN
NaN	NaN	NaN	NaN	NaN	NaN	NaN	NaN	NaN	NaN	NaN	NaN	NaN	NaN	NaN	NaN	NaN	NaN	NaN	NaN	NaN	NaN	NaN	NaN	NaN	NaN	NaN	NaN	NaN	NaN	NaN	NaN	NaN	NaN	NaN	NaN	NaN	NaN	NaN	NaN	NaN	NaN	NaN	NaN	NaN	NaN	NaN	NaN	NaN	NaN
NaN	NaN	0.97888	0.6013	0.74017	1.0823	0.92464	0.9034	0.9528	0.7529	0.62212	0.63666	0.78591	NaN	0.45921	NaN	0.70842	0.49239	NaN	NaN	NaN	NaN	NaN	NaN	NaN	NaN	NaN	NaN	NaN	NaN	NaN	NaN	NaN	NaN	NaN	NaN	0.91068	NaN	0.79421	0.94897	1.1262	1.2738	1.1491	1.0418	0.77997	0.86857	0.82411	1.0002	0.90866	NaN
NaN	NaN	NaN	NaN	NaN	NaN	NaN	NaN	NaN	NaN	NaN	NaN	NaN	NaN	NaN	NaN	NaN	NaN	NaN	NaN	NaN	NaN	NaN	NaN	NaN	NaN	NaN	NaN	NaN	NaN	NaN	NaN	NaN	NaN	NaN	NaN	NaN	NaN	NaN	NaN	NaN	NaN	NaN	NaN	NaN	NaN	NaN	NaN	NaN	NaN
NaN	NaN	NaN	NaN	NaN	NaN	NaN	NaN	NaN	NaN	NaN	NaN	NaN	NaN	NaN	NaN	NaN	NaN	NaN	NaN	NaN	NaN	NaN	NaN	NaN	NaN	NaN	NaN	NaN	NaN	NaN	NaN	NaN	NaN	NaN	NaN	NaN	NaN	NaN	NaN	NaN	NaN	NaN	NaN	NaN	NaN	NaN	NaN	NaN	NaN
NaN	NaN	NaN	NaN	NaN	NaN	NaN	NaN	NaN	NaN	NaN	NaN	NaN	NaN	NaN	NaN	NaN	NaN	NaN	NaN	NaN	NaN	NaN	NaN	NaN	NaN	NaN	NaN	NaN	NaN	NaN	NaN	NaN	NaN	NaN	NaN	NaN	NaN	NaN	NaN	NaN	NaN	NaN	NaN	NaN	NaN	NaN	NaN	NaN	NaN
NaN	NaN	NaN	NaN	NaN	NaN	NaN	NaN	NaN	NaN	NaN	NaN	NaN	NaN	NaN	NaN	NaN	NaN	NaN	NaN	NaN	NaN	NaN	NaN	NaN	NaN	NaN	NaN	NaN	NaN	NaN	NaN	NaN	NaN	NaN	NaN	NaN	NaN	NaN	NaN	NaN	NaN	NaN	NaN	NaN	NaN	NaN	NaN	NaN	NaN
1.0581	4.9485	3.3529	NaN	0.53227	0.57923	NaN	0.47367	0.52822	0.39595	NaN	0.53333	0.90812	0.48779	0.23401	NaN	0.57311	2.8902	NaN	NaN	NaN	NaN	NaN	NaN	NaN	NaN	NaN	NaN	NaN	NaN	NaN	NaN	NaN	NaN	NaN	NaN	NaN	NaN	NaN	NaN	NaN	NaN	NaN	NaN	NaN	NaN	NaN	22.996	NaN	NaN
1.0581	4.9485	3.3529	NaN	0.6168	0.57923	NaN	0.45463	0.52822	0.39595	NaN	0.53333	0.89359	0.48279	0.23401	NaN	0.57311	2.8902	NaN	NaN	NaN	NaN	NaN	NaN	NaN	NaN	NaN	NaN	NaN	NaN	NaN	NaN	NaN	NaN	NaN	NaN	NaN	NaN	NaN	NaN	NaN	NaN	NaN	NaN	NaN	NaN	NaN	22.996	NaN	NaN
1.003	5.5292	2.4436	0.50046	0.4197	0.43541	0.30921	0.50405	0.52222	0.52438	0.56233	0.47771	1.1396	0.75019	0.46227	0.50727	0.85896	2.5279	NaN	3.0774	NaN	NaN	NaN	NaN	NaN	2.5996	NaN	NaN	NaN	3.6997	NaN	NaN	NaN	NaN	NaN	2.0381	1.049	2.1197	0.95067	0.76688	1.8384	5.8195	1.1474	0.64853	0.97952	1.0669	1.8283	20.126	1.0769	3.0919
NaN	NaN	NaN	NaN	NaN	NaN	NaN	NaN	NaN	NaN	NaN	NaN	NaN	NaN	NaN	NaN	NaN	1.9542	NaN	NaN	NaN	NaN	NaN	NaN	NaN	NaN	NaN	NaN	NaN	NaN	NaN	NaN	NaN	NaN	NaN	NaN	NaN	NaN	NaN	NaN	NaN	NaN	NaN	NaN	NaN	NaN	NaN	NaN	NaN	NaN
0.77347	4.8332	3.368	0.50094	0.53725	0.55179	0.26582	0.50643	0.4261	0.70307	0.49092	0.66423	0.75453	0.47939	0.53513	0.4909	0.65757	1.9093	0.80697	1.9933	2.061	0.9627	NaN	2.2314	1.3662	1.5781	1.5893	1.6519	1.4798	2.1598	1.5926	2.2181	1.4541	1.7151	1.8702	1.5061	0.76368	NaN	0.89889	0.71657	1.982	4.3409	0.93062	NaN	1.26	1.505	1.6631	17.05	1.1693	1.8393
0.96208	1.2049	0.30767	0.30176	0.2919	0.42153	0.42898	0.88985	0.11128	0.52913	0.41769	0.092666	0.078179	0.092001	0.08093	0.080584	0.50621	0.10132	1.2852	1.3017	1.3132	1.4093	0.89079	0.88589	0.58258	0.50209	0.51829	0.57591	1.0191	0.23593	0.23728	0.22389	0.22061	0.3172	0.57402	0.24973	0.99879	1.3166	1.7692	0.85566	0.51713	0.94145	1.0779	0.57495	0.22875	0.22803	0.23203	0.17027	0.1621	0.17766
0.98627	0.61158	0.30903	0.2861	0.29762	NaN	0.1694	0.17764	0.12425	0.10207	NaN	0.094337	NaN	0.37411	NaN	0.34703	NaN	NaN	NaN	NaN	NaN	NaN	NaN	NaN	NaN	NaN	NaN	NaN	NaN	NaN	NaN	0.74248	NaN	NaN	NaN	NaN	NaN	NaN	NaN	NaN	NaN	NaN	NaN	NaN	NaN	NaN	NaN	NaN	NaN	NaN
1.0051	1.4855	0.72767	0.67939	1.1879	0.90166	0.75096	0.4768	0.40289	0.56622	0.68346	0.68746	0.46977	0.50179	0.37712	0.43881	0.58404	0.29855	1.3604	1.0994	2.1655	1.0503	1.8853	1.3054	0.75835	1.7382	1.5055	1.4834	1.2629	1.0162	1.0541	0.76627	0.76229	0.67088	0.573	0.68903	1.0323	1.3146	1.1473	1.0025	1.171	0.95027	0.86564	0.5686	0.65256	0.70268	0.57551	0.48529	0.59957	0.67302
0.94509	NaN	0.44322	NaN	NaN	0.46825	NaN	NaN	0.34633	0.3775	0.46671	0.28064	0.22361	0.25207	NaN	0.14035	0.19832	NaN	1.1059	NaN	NaN	0.64024	1.5711	1.1446	1.2403	1.3962	NaN	0.99687	0.92672	0.7268	0.64028	8.7254	0.39623	0.5367	NaN	0.25998	1.0001	1.1148	NaN	0.7782	1.0243	0.72916	0.56269	NaN	0.56408	0.74456	0.72626	0.48667	0.37295	0.38537
1.1209	0.87647	0.61647	0.53119	0.83609	0.77209	0.63151	0.49258	0.2901	0.29855	0.42198	0.35393	7.5109	NaN	NaN	NaN	NaN	NaN	1.2449	1.1824	1.2225	NaN	1.4357	1.0204	1.5589	1.0405	NaN	1.0465	1.2213	0.68022	0.69543	0.44116	0.53599	0.34956	0.90439	NaN	0.89654	NaN	0.60444	0.70232	0.85405	0.59704	0.76039	NaN	NaN	0.77118	0.30239	NaN	0.50043	1.574
0.96872	1.1576	0.98768	1.8703	4.1995	4.8697	5.2473	6.7514	7.1284	5.9265	10.348	7.6263	7.5356	6.3802	4.3491	2.1626	3.759	0.86357	1.4656	1.3058	1.3667	1.2337	2.485	2.4668	4.3595	4.8931	5.2305	12.505	9.6798	13.152	14.556	11.349	8.4454	5.1991	3.1424	2.7764	0.94291	1.5226	0.80739	1.5607	2.8572	2.8812	2.937	4.0778	3.8975	7.7353	4.9248	4.7248	6.2711	6.1119
NaN	NaN	NaN	NaN	NaN	NaN	NaN	NaN	NaN	NaN	NaN	NaN	NaN	NaN	NaN	NaN	NaN	NaN	NaN	NaN	NaN	NaN	NaN	NaN	NaN	NaN	NaN	NaN	NaN	NaN	NaN	NaN	NaN	NaN	NaN	NaN	NaN	NaN	NaN	NaN	NaN	NaN	NaN	NaN	NaN	NaN	NaN	NaN	NaN	NaN
NaN	NaN	NaN	NaN	NaN	NaN	NaN	NaN	NaN	NaN	NaN	NaN	NaN	NaN	0.3486	NaN	NaN	NaN	1.3018	1.6715	0.98297	1.3549	NaN	1.1603	1.3451	1.1786	1.3941	1.3227	1.1753	NaN	1.9115	1.5082	NaN	1.7047	1.3401	NaN	NaN	NaN	NaN	0.9634	NaN	NaN	NaN	0.75703	0.73445	NaN	NaN	NaN	0.69005	NaN
1.0338	NaN	0.50771	0.7562	0.87485	0.91657	0.70712	0.93409	0.8216	0.94677	1.0184	1.0566	0.92035	0.74064	0.79921	0.42906	NaN	0.2954	1.7333	2.0511	1.0882	0.78844	2.0205	1.8607	1.6914	1.9259	1.7479	2.1994	1.134	1.6071	1.9631	2.1077	1.7249	1.4491	0.80376	1.1579	0.73302	1.3358	0.71732	1.023	1.1841	1.2657	0.85431	0.988	0.95847	1.2669	1.1668	1.2001	1.3079	1.1817
1.0014	0.92232	0.4601	0.44998	0.47508	0.43444	0.3553	0.40022	0.20105	0.25297	0.33049	0.32173	0.23503	0.27367	0.25605	0.23139	0.4917	0.33373	1.2291	1.1587	0.68813	0.4645	1.2115	0.91167	1.0416	0.89757	0.97896	0.75285	0.57357	0.58588	0.68734	0.50617	0.48483	0.51026	0.47516	0.52157	1.1462	1.2582	0.36893	0.61965	0.81331	0.53898	0.34915	0.29729	0.34879	0.4347	0.37756	0.3684	0.43446	NaN
1.0578	1.0783	1.0593	0.72872	1.0199	0.86872	0.79028	1.0279	0.55332	0.64232	0.7034	0.80569	0.74633	0.69213	0.69201	0.45982	0.84132	0.39649	1.4439	1.3139	1.578	1.646	1.4977	1.4071	1.6144	1.4866	1.5939	1.5702	1.8031	1.7167	1.5251	1.2404	1.1705	1.0365	1.2937	0.8994	1.0786	1.416	1.1626	0.99721	0.89562	0.96929	1.2219	1.0916	0.95541	0.97184	0.75034	0.74281	1.0175	1.0515
NaN	NaN	NaN	NaN	NaN	NaN	NaN	NaN	NaN	NaN	NaN	NaN	NaN	NaN	NaN	NaN	NaN	NaN	1.3953	3.1928	1.6832	2.1088	NaN	1.3293	1.6517	1.2649	NaN	1.0918	1.934	2.7359	1.3932	NaN	NaN	2.2213	NaN	NaN	NaN	1.517	1.0669	NaN	1.063	1.1645	NaN	1.6327	1.5919	1.464	NaN	1.4759	NaN	NaN
NaN	NaN	NaN	NaN	NaN	NaN	NaN	NaN	NaN	NaN	NaN	NaN	NaN	NaN	NaN	NaN	NaN	NaN	NaN	NaN	2.2901	1.0028	NaN	NaN	0.8365	NaN	NaN	NaN	NaN	NaN	NaN	NaN	NaN	NaN	NaN	NaN	NaN	NaN	NaN	NaN	NaN	NaN	NaN	NaN	NaN	NaN	NaN	NaN	NaN	NaN
NaN	NaN	NaN	NaN	NaN	NaN	NaN	NaN	NaN	NaN	NaN	NaN	NaN	NaN	NaN	NaN	NaN	NaN	NaN	NaN	NaN	NaN	NaN	NaN	NaN	1.2126	1.3287	NaN	NaN	NaN	NaN	NaN	NaN	NaN	NaN	NaN	NaN	NaN	NaN	NaN	NaN	NaN	NaN	NaN	NaN	NaN	NaN	NaN	NaN	NaN
0.92737	0.87192	0.80101	0.66515	0.56921	0.59006	0.45234	0.45638	0.33082	0.34769	0.42681	0.34206	0.35439	0.26705	0.24559	0.14679	0.26838	0.089984	1.1526	1.3881	1.0773	1.3607	1.104	1.2388	0.92555	1.0471	1.0466	0.88546	0.91582	0.87172	0.59066	0.52279	0.48645	0.34153	0.33084	0.277	0.93051	0.92135	1.1735	0.94157	0.84537	0.84005	0.6275	0.67775	0.59126	0.53315	0.46101	0.55907	0.42058	0.40623
0.86776	1.0142	0.92439	0.71176	0.69619	0.61824	0.53079	0.66756	0.51904	0.48945	0.47594	0.37774	0.46214	0.38257	NaN	0.23492	0.51044	0.25027	1.425	1.6091	1.1881	1.5212	1.6777	1.37	1.4034	1.2564	1.4716	1.2866	1.4392	1.1929	1.2678	0.97996	0.93233	1.1045	1.2084	1.0124	1.0312	1.2579	1.0885	0.86256	0.90249	0.85103	1.0218	0.88255	0.79675	0.71111	0.64117	0.63936	0.62892	0.75815
1.079	1.5442	0.71936	0.77435	0.66964	0.87895	0.80801	1.0874	0.61228	0.73806	0.97544	1.049	0.6024	0.40011	0.92144	0.37673	2.219	0.52829	1.4246	1.6297	1.084	1.563	1.7721	1.7033	1.3253	1.6965	1.1363	1.3963	1.6967	2.1645	1.247	1.2383	0.96041	1.0059	0.78956	0.84127	1.005	1.4997	1.1869	1.0497	NaN	1.2429	1.0254	0.99417	0.87931	1.2574	1.0792	1.0662	1.0576	1.5401
NaN	NaN	NaN	0.65238	0.68538	NaN	NaN	NaN	0.48551	NaN	NaN	NaN	NaN	NaN	NaN	NaN	NaN	NaN	1.369	1.3627	1.2388	NaN	NaN	1.1475	1.2524	1.145	1.1569	1.4091	1.167	1.173	1.2117	NaN	0.96041	1.0286	0.76141	0.67845	1.1167	1.0572	NaN	NaN	NaN	0.78872	NaN	NaN	NaN	0.72623	NaN	NaN	NaN	NaN
NaN	NaN	NaN	NaN	NaN	NaN	NaN	0.66015	NaN	NaN	0.47995	NaN	0.29398	NaN	NaN	NaN	NaN	0.14879	NaN	1.1493	NaN	NaN	NaN	1.1475	0.84535	1.5678	1.2234	1.4091	1.167	1.173	1.2117	1.0263	0.96041	0.80739	0.76141	NaN	NaN	NaN	1.0959	NaN	0.85302	NaN	NaN	NaN	0.63821	NaN	NaN	NaN	NaN	NaN
1.1736	1.3851	1.321	NaN	NaN	NaN	NaN	NaN	NaN	NaN	NaN	NaN	NaN	NaN	NaN	NaN	NaN	NaN	1.13	2.5791	NaN	NaN	NaN	NaN	NaN	NaN	NaN	NaN	NaN	NaN	NaN	NaN	NaN	NaN	NaN	NaN	0.9847	NaN	NaN	NaN	NaN	NaN	NaN	NaN	NaN	NaN	NaN	NaN	NaN	NaN
1.0468	1.2895	1.1654	3.3788	2.7354	5.6918	6.1673	7.6148	8.5239	6.4759	8.9258	3.1203	4.6671	5.5413	3.0466	1.7958	NaN	NaN	1.2772	2.434	1.0165	1.5319	4.1488	6.4778	5.4435	5.3969	7.6063	21.038	15.329	15.182	10.609	11.758	9.7758	6.7189	3.9112	2.5847	0.95996	NaN	1.4827	2.7699	2.3313	5.6391	5.6558	6.402	5.3258	9.753	8.2402	7.0633	6.8847	5.4573
NaN	NaN	NaN	NaN	NaN	NaN	NaN	7.5287	NaN	NaN	NaN	NaN	NaN	NaN	NaN	NaN	NaN	0.27583	NaN	NaN	1.6771	1.6528	NaN	NaN	NaN	4.7544	NaN	NaN	0.87672	NaN	NaN	NaN	NaN	NaN	NaN	NaN	NaN	1.8142	NaN	NaN	NaN	NaN	1.0804	NaN	NaN	NaN	NaN	NaN	NaN	NaN
NaN	NaN	NaN	NaN	NaN	NaN	NaN	NaN	NaN	NaN	NaN	NaN	NaN	NaN	NaN	NaN	NaN	NaN	NaN	NaN	NaN	NaN	NaN	NaN	2.4882	NaN	NaN	NaN	NaN	NaN	1.1372	NaN	NaN	NaN	1.5652	NaN	NaN	3.0472	NaN	NaN	2.8261	NaN	NaN	NaN	NaN	NaN	NaN	NaN	NaN	NaN
NaN	NaN	NaN	NaN	NaN	NaN	NaN	NaN	NaN	NaN	NaN	NaN	NaN	NaN	NaN	NaN	NaN	NaN	NaN	NaN	NaN	NaN	NaN	NaN	NaN	NaN	NaN	NaN	NaN	NaN	NaN	NaN	NaN	NaN	NaN	NaN	NaN	NaN	NaN	NaN	NaN	NaN	NaN	NaN	NaN	NaN	NaN	NaN	NaN	NaN
NaN	NaN	NaN	NaN	NaN	NaN	NaN	NaN	NaN	NaN	NaN	NaN	NaN	NaN	NaN	NaN	NaN	NaN	1.1887	0.95613	0.86398	0.32634	NaN	1.1074	1.0468	1.5985	1.1182	1.2721	0.81119	NaN	NaN	NaN	NaN	NaN	NaN	NaN	NaN	NaN	NaN	NaN	NaN	NaN	NaN	NaN	NaN	NaN	NaN	NaN	NaN	NaN
NaN	NaN	NaN	NaN	NaN	NaN	NaN	NaN	0.60651	0.53388	0.82637	0.76415	NaN	0.34677	NaN	NaN	0.41655	NaN	NaN	NaN	NaN	NaN	NaN	NaN	NaN	NaN	NaN	1.9514	NaN	1.2006	NaN	0.85102	0.86491	0.62658	NaN	0.60932	NaN	NaN	NaN	NaN	NaN	1.2188	NaN	NaN	0.81167	0.92295	NaN	NaN	NaN	NaN
NaN	NaN	NaN	NaN	NaN	NaN	NaN	NaN	NaN	NaN	NaN	NaN	NaN	NaN	NaN	NaN	NaN	NaN	NaN	NaN	NaN	NaN	NaN	NaN	1.1991	NaN	NaN	NaN	NaN	0.42016	NaN	NaN	NaN	NaN	NaN	NaN	1.0257	NaN	0.78153	NaN	0.65285	NaN	NaN	NaN	NaN	NaN	0.31682	NaN	NaN	0.31556
NaN	NaN	NaN	NaN	NaN	NaN	NaN	NaN	NaN	NaN	NaN	NaN	NaN	NaN	NaN	NaN	NaN	NaN	NaN	NaN	NaN	NaN	NaN	NaN	NaN	NaN	NaN	NaN	NaN	NaN	NaN	NaN	NaN	NaN	NaN	NaN	NaN	NaN	NaN	NaN	NaN	NaN	NaN	NaN	NaN	NaN	NaN	NaN	NaN	NaN
1.0123	0.87491	0.72648	0.66503	0.66003	0.48166	0.41932	0.35233	0.25613	NaN	0.1816	0.21123	NaN	0.21249	NaN	NaN	NaN	NaN	1.4702	1.3227	1.295	1.1476	1.1773	0.9734	1.2469	NaN	0.89413	0.64985	NaN	0.57381	0.45991	0.42864	NaN	0.37277	0.38992	0.49505	1.0529	0.89632	0.79508	0.79875	0.65507	0.6141	0.58691	0.63999	0.49542	0.35377	0.33506	0.27784	NaN	0.24798
NaN	NaN	NaN	NaN	NaN	NaN	NaN	NaN	NaN	NaN	NaN	NaN	NaN	NaN	NaN	NaN	NaN	NaN	1.1706	NaN	0.98433	0.4861	NaN	NaN	0.61621	NaN	NaN	NaN	NaN	NaN	NaN	NaN	NaN	NaN	NaN	NaN	NaN	0.56609	0.39989	NaN	NaN	NaN	NaN	NaN	NaN	NaN	NaN	NaN	NaN	NaN
NaN	NaN	NaN	NaN	NaN	NaN	NaN	NaN	NaN	NaN	NaN	NaN	NaN	NaN	NaN	NaN	NaN	NaN	NaN	NaN	NaN	NaN	NaN	NaN	NaN	NaN	NaN	NaN	NaN	NaN	NaN	NaN	NaN	NaN	NaN	NaN	NaN	NaN	NaN	NaN	NaN	NaN	NaN	NaN	NaN	NaN	NaN	NaN	NaN	NaN
NaN	NaN	NaN	NaN	NaN	NaN	NaN	NaN	NaN	NaN	NaN	NaN	NaN	NaN	NaN	NaN	NaN	NaN	NaN	NaN	NaN	NaN	NaN	NaN	NaN	NaN	NaN	NaN	NaN	NaN	NaN	NaN	NaN	NaN	NaN	NaN	NaN	NaN	NaN	NaN	NaN	NaN	NaN	NaN	NaN	NaN	NaN	NaN	NaN	NaN
NaN	NaN	NaN	NaN	NaN	NaN	NaN	NaN	NaN	NaN	NaN	NaN	NaN	NaN	NaN	NaN	NaN	NaN	NaN	NaN	NaN	NaN	NaN	NaN	NaN	NaN	NaN	NaN	NaN	NaN	NaN	NaN	NaN	NaN	NaN	NaN	NaN	NaN	NaN	NaN	NaN	NaN	NaN	NaN	NaN	NaN	NaN	NaN	NaN	NaN
NaN	NaN	NaN	NaN	0.80324	NaN	NaN	NaN	NaN	NaN	NaN	NaN	NaN	NaN	NaN	NaN	NaN	NaN	NaN	NaN	NaN	NaN	NaN	NaN	NaN	NaN	NaN	NaN	NaN	NaN	NaN	NaN	NaN	NaN	NaN	NaN	NaN	NaN	NaN	NaN	NaN	NaN	NaN	NaN	0.70613	NaN	NaN	NaN	NaN	NaN
0.93109	1.0207	0.89789	1.0947	0.68583	1.2161	0.74385	0.57913	0.55594	1.071	0.81843	0.9865	0.87413	0.76265	0.83475	0.74191	NaN	0.4571	1.3915	1.4905	1.1367	1.2273	1.8248	1.1065	1.3533	1.4011	1.258	1.302	1.5911	1.511	1.3196	1.3731	1.4737	1.2254	1.931	2.0891	0.86309	1.3376	0.92597	0.80812	0.59782	1.3309	0.66987	0.98569	0.52214	0.772	1.0109	1.0409	0.67014	1.4137
NaN	NaN	NaN	NaN	NaN	NaN	NaN	NaN	NaN	NaN	NaN	NaN	NaN	NaN	NaN	NaN	NaN	NaN	NaN	NaN	NaN	NaN	NaN	1.2005	NaN	NaN	NaN	NaN	NaN	NaN	NaN	NaN	NaN	1.2046	NaN	1.1256	1.1266	NaN	0.94985	NaN	NaN	NaN	1.2398	NaN	1.7464	NaN	1.0581	1.1199	NaN	0.73763
NaN	NaN	NaN	NaN	NaN	NaN	NaN	NaN	NaN	NaN	NaN	NaN	NaN	NaN	NaN	NaN	NaN	NaN	1.3716	1.2302	NaN	1.1775	2.0997	NaN	1.6862	1.6668	1.9231	1.2487	NaN	1.8067	1.4825	1.7842	1.3331	1.5494	1.0434	1.0586	NaN	NaN	NaN	0.99399	NaN	NaN	NaN	NaN	1.1644	1.4139	NaN	NaN	1.0347	NaN
0.8932	1.2834	1.1905	1.0206	1.0736	0.86367	0.78627	1.045	0.83422	NaN	0.84307	NaN	0.84382	0.55352	0.4895	0.38813	NaN	0.31554	0.84204	1.5924	0.92979	1.1117	1.6555	1.7354	1.6588	1.6963	1.4419	1.1981	1.1308	1.1818	1.5138	1.0441	0.91809	0.90482	0.88898	0.67926	0.68033	1.153	1.1356	1.8077	1.0577	1.0567	1.0036	0.98488	1.3608	0.90397	0.98822	1.1009	NaN	0.86873
NaN	NaN	0.89087	NaN	0.8643	1.649	NaN	NaN	NaN	NaN	NaN	NaN	NaN	NaN	NaN	NaN	NaN	NaN	1.3472	2.0488	NaN	1.0723	2.4271	2.2202	NaN	NaN	1.9118	1.3999	NaN	NaN	NaN	1.7842	1.7883	1.5494	1.6554	1.4755	0.90045	1.7113	1.2771	NaN	1.3825	0.82355	1.3966	0.96171	1.9971	1.2797	NaN	NaN	1.2326	1.0326
0.72163	1.1413	NaN	0.95707	1.0736	1.0955	0.89248	1.4717	1.0041	0.73611	0.91138	0.83501	0.9209	0.96602	0.81836	0.88191	1.0848	NaN	0.64778	1.6896	1.2702	1.4357	1.8332	NaN	1.5967	2.2775	1.3343	1.3999	1.8685	1.6113	1.5639	NaN	1.7883	NaN	NaN	3.1814	1.058	1.6196	0.94985	NaN	1.1547	0.97556	1.1333	0.96171	1.7464	1.2797	1.0581	1.1199	NaN	0.87274
0.86793	1.0896	0.83015	1.0232	1.098	1.0786	1.0248	1.2324	0.88674	0.8934	1.1052	1.3051	1.1368	1.19	0.92698	0.69566	1.0942	0.55184	1.2853	1.7509	1.1676	1.1426	2.36	1.9432	1.9732	1.9999	2.0981	2.2199	1.9325	2.3768	2.4754	2.2337	1.8821	1.979	1.4957	1.3958	0.95932	1.3139	0.96156	0.99717	1.2594	1.2591	1.1066	1.5234	1.4736	1.375	1.2926	1.4017	1.7049	1.6305
NaN	NaN	NaN	NaN	NaN	NaN	NaN	NaN	NaN	NaN	NaN	NaN	NaN	NaN	NaN	NaN	NaN	NaN	NaN	NaN	NaN	NaN	NaN	NaN	NaN	NaN	NaN	NaN	NaN	NaN	NaN	NaN	NaN	NaN	NaN	NaN	NaN	NaN	NaN	NaN	NaN	NaN	NaN	NaN	NaN	NaN	NaN	NaN	NaN	NaN
NaN	0.85462	NaN	1.546	NaN	0.81702	0.67718	0.71146	1.0984	0.79361	0.6166	0.80569	0.7276	0.88304	0.61067	0.45982	0.4336	NaN	1.3386	NaN	0.64554	0.86459	NaN	2.0828	1.2056	1.2048	1.4894	1.8998	1.5557	1.9707	NaN	2.4104	2.1335	1.6111	0.98008	1.0247	0.98564	1.5311	NaN	NaN	0.93643	1.2846	1.1628	2.172	0.84946	0.97474	1.7598	1.7955	1.2118	1.2585
0.94373	0.92466	0.74437	0.84656	0.98476	0.80711	0.75734	0.82636	0.57015	0.53514	0.51212	0.30239	0.25002	NaN	0.20452	NaN	0.26704	NaN	NaN	1.7184	1.4686	NaN	1.8178	1.528	NaN	1.6693	1.3693	1.472	1.3221	0.88291	NaN	0.40353	0.44639	NaN	NaN	0.33473	0.67246	1.3802	1.0652	1.0499	0.98222	1.0653	NaN	0.94932	0.82245	0.64224	0.66302	0.3941	0.42352	NaN
NaN	NaN	NaN	NaN	NaN	NaN	NaN	NaN	NaN	NaN	NaN	NaN	NaN	NaN	NaN	NaN	NaN	NaN	NaN	NaN	NaN	NaN	NaN	NaN	NaN	NaN	NaN	NaN	NaN	NaN	NaN	NaN	NaN	NaN	NaN	NaN	NaN	NaN	NaN	NaN	NaN	NaN	NaN	NaN	NaN	NaN	NaN	NaN	NaN	NaN
NaN	NaN	NaN	NaN	NaN	NaN	NaN	NaN	NaN	NaN	NaN	NaN	NaN	NaN	NaN	NaN	NaN	NaN	NaN	NaN	NaN	NaN	NaN	NaN	NaN	NaN	NaN	NaN	NaN	NaN	NaN	NaN	NaN	NaN	NaN	NaN	NaN	NaN	NaN	NaN	NaN	NaN	NaN	NaN	NaN	NaN	NaN	NaN	NaN	NaN
0.88362	0.7876	0.56551	0.85763	NaN	NaN	0.25557	0.35017	0.50135	NaN	NaN	NaN	NaN	0.26721	0.17463	NaN	NaN	NaN	1.1807	3.0898	0.78885	0.80431	0.79577	1.8691	0.77167	1.0316	0.97604	0.77063	0.88637	0.85131	NaN	0.72351	0.57238	0.41896	NaN	0.18224	0.78812	0.75656	1.3162	0.56134	NaN	NaN	0.53711	1.0315	0.47694	0.46631	0.84149	0.67525	0.36337	NaN
NaN	NaN	NaN	NaN	NaN	NaN	NaN	NaN	NaN	NaN	NaN	NaN	NaN	NaN	NaN	NaN	NaN	NaN	NaN	NaN	NaN	NaN	NaN	NaN	NaN	NaN	NaN	NaN	NaN	NaN	NaN	NaN	NaN	NaN	NaN	NaN	NaN	NaN	NaN	NaN	NaN	NaN	NaN	NaN	NaN	NaN	NaN	NaN	NaN	NaN
NaN	1.4964	NaN	1.1317	1.316	NaN	NaN	NaN	NaN	NaN	NaN	1.3252	NaN	NaN	1.4046	NaN	1.9308	NaN	1.2362	NaN	1.5385	1.6612	2.1433	2.1864	2.5806	2.1189	2.182	2.1477	NaN	2.0979	NaN	NaN	NaN	NaN	NaN	NaN	1.0228	1.8356	1.4703	1.3174	NaN	NaN	1.6542	1.9473	1.7151	1.6457	1.6155	2.1867	1.6912	2.1518
1.1686	0.96308	0.9711	NaN	0.63467	1.123	0.78308	0.97536	0.87772	1.0217	0.79066	1.1841	NaN	1.171	0.90647	0.74002	1.2953	0.58312	1.0982	1.8372	0.78463	1.0239	1.9846	1.8964	1.6061	1.8656	1.8295	2.582	1.4367	1.8187	2.2704	1.4893	1.8074	1.458	NaN	1.346	NaN	NaN	NaN	1.137	1.0856	NaN	0.88187	0.96136	0.66639	0.87485	1.1495	NaN	1.068	1.4117
0.80866	0.71067	0.75864	NaN	NaN	0.71265	0.68636	NaN	NaN	0.56703	0.66816	0.97771	0.78305	NaN	0.56465	NaN	NaN	NaN	1.4206	0.71023	1.1287	0.62605	NaN	0.82575	1.338	1.2161	1.0064	1.1874	1.0685	1.1364	1.17	NaN	NaN	NaN	NaN	NaN	0.9936	0.86825	1.1131	NaN	1.2232	NaN	NaN	NaN	NaN	0.78199	0.87906	0.97257	0.88534	NaN
NaN	NaN	NaN	NaN	NaN	NaN	NaN	NaN	NaN	NaN	NaN	NaN	NaN	NaN	NaN	NaN	NaN	NaN	NaN	NaN	NaN	NaN	NaN	NaN	NaN	NaN	NaN	NaN	NaN	NaN	NaN	NaN	NaN	NaN	NaN	NaN	NaN	NaN	NaN	NaN	NaN	NaN	NaN	NaN	NaN	NaN	NaN	NaN	NaN	NaN
NaN	NaN	NaN	NaN	NaN	NaN	NaN	NaN	NaN	NaN	NaN	NaN	NaN	NaN	NaN	NaN	NaN	NaN	NaN	NaN	NaN	NaN	NaN	NaN	NaN	NaN	NaN	NaN	NaN	NaN	NaN	NaN	NaN	NaN	NaN	NaN	NaN	NaN	NaN	NaN	NaN	NaN	NaN	NaN	NaN	NaN	NaN	NaN	NaN	NaN
NaN	NaN	NaN	NaN	NaN	NaN	NaN	NaN	NaN	NaN	NaN	NaN	NaN	NaN	NaN	NaN	NaN	NaN	NaN	NaN	NaN	NaN	NaN	NaN	NaN	NaN	NaN	NaN	NaN	NaN	NaN	NaN	NaN	NaN	NaN	NaN	NaN	NaN	NaN	NaN	NaN	NaN	NaN	NaN	NaN	NaN	NaN	NaN	NaN	NaN
NaN	NaN	NaN	NaN	NaN	NaN	NaN	NaN	NaN	NaN	NaN	NaN	NaN	NaN	NaN	NaN	NaN	NaN	NaN	NaN	NaN	NaN	NaN	NaN	NaN	NaN	NaN	NaN	NaN	NaN	NaN	NaN	NaN	NaN	NaN	NaN	NaN	NaN	NaN	NaN	NaN	NaN	NaN	NaN	NaN	NaN	NaN	NaN	NaN	NaN
NaN	NaN	NaN	NaN	NaN	NaN	NaN	NaN	NaN	NaN	NaN	NaN	NaN	NaN	NaN	NaN	NaN	NaN	NaN	NaN	NaN	NaN	1.9493	1.461	NaN	NaN	NaN	NaN	1.3147	1.3896	NaN	0.38933	NaN	NaN	NaN	NaN	NaN	NaN	NaN	NaN	NaN	NaN	NaN	NaN	NaN	NaN	NaN	NaN	NaN	NaN
NaN	NaN	NaN	NaN	NaN	NaN	NaN	NaN	NaN	NaN	NaN	NaN	NaN	NaN	NaN	NaN	NaN	NaN	1.7026	NaN	NaN	1.0833	2.8435	1.8832	1.3865	1.8114	1.2708	NaN	NaN	NaN	NaN	NaN	NaN	NaN	NaN	NaN	NaN	NaN	NaN	NaN	NaN	NaN	NaN	NaN	NaN	NaN	NaN	NaN	NaN	NaN
0.97421	1.1088	0.62335	0.69888	0.72013	0.749	0.52194	0.47233	NaN	NaN	NaN	NaN	NaN	NaN	NaN	NaN	NaN	NaN	1.192	1.6389	0.9388	0.79744	1.5183	1.3743	1.2511	1.3392	1.1764	1.0298	0.65843	NaN	NaN	NaN	NaN	NaN	NaN	NaN	0.96904	0.79077	0.70052	0.82122	0.79811	0.78857	0.57283	0.53554	NaN	0.20406	NaN	NaN	NaN	NaN
NaN	NaN	NaN	NaN	NaN	NaN	NaN	NaN	NaN	NaN	NaN	NaN	NaN	NaN	NaN	NaN	NaN	NaN	NaN	NaN	NaN	NaN	1.6846	NaN	NaN	NaN	NaN	NaN	NaN	NaN	NaN	NaN	NaN	NaN	NaN	NaN	NaN	0.93419	NaN	NaN	NaN	NaN	NaN	NaN	0.37561	NaN	NaN	NaN	0.051301	NaN
0.93968	0.95938	0.81187	0.61755	0.71003	0.72341	0.68889	0.58775	0.45116	0.379	0.33752	0.14195	0.037745	NaN	0.030658	NaN	NaN	NaN	1.2286	1.5327	1.2194	1.1804	1.6043	1.3571	1.2869	1.5669	1.3015	0.98068	1.0235	0.65495	0.19626	0.076641	0.057503	NaN	0.015761	NaN	0.97961	1.0182	1.0274	0.74221	0.8288	0.91046	0.71714	0.68922	0.49645	0.32052	0.38157	0.14806	0.047802	0.044864
0.92311	1.0961	0.56655	NaN	0.79492	0.83607	0.75353	0.94204	0.72617	0.72449	0.73686	0.85699	0.83877	0.89175	NaN	NaN	1.1277	0.51243	1.1948	1.9339	0.85886	0.79728	1.982	1.7197	1.5218	1.5795	1.7636	1.8483	1.2465	1.7211	1.8107	1.9066	1.7284	NaN	1.1198	1.5694	0.92684	1.3485	0.74386	0.8654	0.95187	1.0623	0.76203	0.95474	0.89563	0.91167	1.1844	1.2473	1.2811	1.3668
NaN	NaN	NaN	0.79333	NaN	NaN	NaN	NaN	NaN	NaN	NaN	NaN	NaN	NaN	0.67179	0.59462	NaN	NaN	NaN	NaN	NaN	NaN	NaN	NaN	NaN	NaN	NaN	NaN	NaN	NaN	NaN	NaN	NaN	1.9099	NaN	NaN	NaN	NaN	NaN	NaN	NaN	NaN	NaN	NaN	NaN	NaN	NaN	NaN	NaN	NaN
NaN	NaN	NaN	NaN	NaN	NaN	NaN	NaN	NaN	NaN	NaN	NaN	NaN	NaN	NaN	NaN	NaN	NaN	NaN	NaN	NaN	NaN	NaN	NaN	NaN	NaN	NaN	NaN	NaN	NaN	NaN	NaN	NaN	NaN	NaN	NaN	NaN	NaN	NaN	NaN	NaN	NaN	NaN	NaN	NaN	NaN	NaN	NaN	NaN	NaN
1.0012	0.97234	0.78245	0.80055	0.82937	0.77272	0.71045	0.82851	0.61212	0.56978	0.62731	0.58075	0.52607	0.5898	0.51801	0.41404	0.77807	0.32495	1.1127	1.5307	1.4549	1.3353	1.6159	1.5118	1.394	1.5156	1.2935	1.4259	1.2229	1.2766	1.167	1.1698	1.1042	0.97147	1.0753	0.92275	1.0006	1.1139	0.88614	0.89597	0.95601	0.86094	0.83607	0.79219	0.61941	0.55175	0.78943	0.81794	0.85736	0.90756
0.81737	1.1349	0.65289	0.88733	0.98018	0.97333	0.80245	NaN	0.81165	0.83758	1.0109	0.95944	0.99782	1.1257	0.6715	0.51672	1.1642	0.73846	1.0909	2.0165	0.9164	NaN	NaN	1.4413	1.9107	1.5626	1.7073	1.9524	1.271	1.3353	2.5421	2.101	2.0154	1.6967	1.3667	1.5117	0.87184	1.2768	0.76738	0.98322	1.2274	1.1897	0.78968	1.2061	1.2815	1.1947	1.4407	1.6197	1.2333	1.2474
0.81737	1.1349	0.65289	0.88733	0.98018	0.97333	0.80245	NaN	0.81165	0.83758	1.0109	0.95944	0.99782	1.1257	0.6715	0.51672	1.1642	0.73846	1.0909	2.0165	0.9164	NaN	NaN	1.4413	1.9107	1.5626	1.7073	1.9524	1.271	1.3353	2.5421	2.101	2.0154	1.6967	1.3667	1.5117	0.87184	1.2768	0.76738	0.98322	1.2274	1.1897	0.78968	1.2061	1.2815	1.1947	1.4407	1.6197	1.2333	1.2474
0.92022	0.96853	0.79586	0.61863	0.9244	0.97711	0.78919	0.78487	0.67476	0.68867	0.89409	0.88792	0.96967	0.93514	0.77205	0.69661	1.0422	0.29793	1.238	0.90693	1.2635	1.1013	NaN	1.1817	1.2487	1.3972	1.4043	1.3558	1.4711	1.7462	1.6816	1.4118	1.1195	1.4974	1.2883	1.189	0.83631	0.94056	0.91543	0.92834	0.96353	0.8271	0.94786	0.37107	0.60243	0.59023	1.2059	1.1707	0.9809	0.95492
NaN	NaN	NaN	NaN	NaN	NaN	NaN	NaN	NaN	NaN	NaN	NaN	NaN	NaN	NaN	NaN	NaN	NaN	NaN	NaN	NaN	NaN	NaN	NaN	NaN	NaN	NaN	NaN	NaN	NaN	NaN	NaN	NaN	NaN	NaN	NaN	NaN	NaN	NaN	NaN	NaN	NaN	NaN	NaN	NaN	NaN	NaN	NaN	NaN	NaN
1.0081	NaN	0.80686	NaN	NaN	NaN	NaN	NaN	NaN	0.59136	NaN	NaN	NaN	NaN	NaN	NaN	NaN	NaN	NaN	NaN	NaN	NaN	NaN	NaN	2.1017	NaN	NaN	NaN	NaN	0.83866	NaN	NaN	NaN	NaN	NaN	NaN	NaN	NaN	1.0025	1.1585	NaN	NaN	NaN	NaN	1.1563	NaN	NaN	NaN	NaN	NaN
NaN	NaN	NaN	NaN	NaN	NaN	NaN	0.9526	NaN	NaN	NaN	NaN	NaN	NaN	NaN	NaN	NaN	NaN	1.3892	NaN	NaN	NaN	NaN	NaN	NaN	NaN	NaN	NaN	NaN	NaN	NaN	NaN	NaN	NaN	NaN	NaN	1.2079	1.5209	NaN	NaN	NaN	NaN	0.98533	1.1088	NaN	NaN	NaN	NaN	NaN	NaN
NaN	NaN	NaN	NaN	NaN	NaN	NaN	NaN	NaN	NaN	NaN	NaN	NaN	NaN	NaN	NaN	NaN	NaN	NaN	NaN	NaN	NaN	NaN	NaN	NaN	NaN	NaN	NaN	1.203	NaN	NaN	NaN	NaN	NaN	NaN	NaN	NaN	NaN	NaN	NaN	NaN	NaN	NaN	NaN	NaN	NaN	NaN	NaN	NaN	NaN
1.1478	1.4816	1.1035	1.1221	0.95311	1.1913	1.2311	1.7772	2.48	0.59136	3.4162	3.65	3.9908	3.4882	2.391	1.5669	3.1867	NaN	1.3892	2.4506	1.0122	0.95895	2.4163	2.3915	2.1017	NaN	NaN	1.9042	NaN	6.3556	NaN	NaN	7.0567	NaN	NaN	NaN	1.2079	1.5209	1.0025	1.1585	1.1205	1.3177	0.98533	1.1088	1.1563	NaN	0.73867	4.3615	NaN	4.1853
1.0081	1.527	0.80686	1.1221	0.95311	1.1913	0.88274	NaN	NaN	2.3883	NaN	3.65	3.9908	3.4882	2.391	1.5669	NaN	NaN	1.9464	NaN	NaN	1.1421	NaN	2.3915	2.1017	NaN	NaN	NaN	1.203	6.3556	NaN	NaN	7.0567	5.3767	NaN	NaN	1.0556	1.5209	0.84551	1.0794	NaN	NaN	1.3668	1.8794	1.6386	1.811	0.73867	4.3615	4.7284	4.1853
NaN	1.1875	NaN	NaN	NaN	NaN	NaN	0.80062	NaN	0.81272	1.649	1.9986	NaN	0.62929	NaN	NaN	NaN	NaN	NaN	NaN	NaN	NaN	NaN	NaN	NaN	NaN	NaN	NaN	NaN	NaN	1.5017	NaN	NaN	NaN	NaN	NaN	0.94338	NaN	0.46131	0.45388	1.1091	0.39885	NaN	NaN	0.26421	0.59383	0.71902	0.82638	0.65584	NaN
NaN	NaN	0.62913	NaN	NaN	NaN	NaN	NaN	1.1553	0.99669	NaN	NaN	NaN	NaN	NaN	0.51009	NaN	0.72231	1.3167	NaN	NaN	NaN	NaN	NaN	NaN	NaN	NaN	NaN	NaN	NaN	1.5203	NaN	NaN	NaN	NaN	1.2731	1.0792	NaN	NaN	0.96811	NaN	NaN	NaN	2.4972	1.2184	1.1153	NaN	1.6004	NaN	1.3734
0.97399	0.90289	0.8039	0.67639	0.94736	0.80866	0.77943	0.83743	0.57332	0.72298	0.70695	0.82739	0.79113	0.7024	0.75828	0.50964	0.9981	0.79111	1.2486	2.0187	1.5852	1.5011	1.4518	1.2266	1.4148	1.3714	1.3937	1.3745	1.7074	1.4581	1.6448	1.399	1.3573	1.0997	1.5865	1.1406	0.93764	1.0838	1.1802	0.88636	0.87606	0.88659	1.2342	1.4552	1.0967	1.4189	0.97604	0.96817	1.2068	1.1576
NaN	1.1646	0.97479	NaN	NaN	NaN	NaN	NaN	NaN	NaN	0.70828	NaN	0.8444	NaN	NaN	0.55014	0.8696	NaN	NaN	NaN	NaN	NaN	NaN	2.3154	NaN	NaN	NaN	NaN	NaN	NaN	NaN	NaN	NaN	NaN	1.5438	NaN	NaN	NaN	NaN	NaN	NaN	NaN	NaN	NaN	1.3452	NaN	NaN	NaN	NaN	NaN
NaN	NaN	NaN	NaN	NaN	NaN	NaN	NaN	NaN	NaN	NaN	NaN	NaN	NaN	NaN	NaN	NaN	NaN	NaN	NaN	NaN	NaN	1.357	NaN	NaN	NaN	NaN	NaN	NaN	NaN	NaN	NaN	NaN	NaN	NaN	NaN	NaN	NaN	NaN	NaN	NaN	NaN	NaN	NaN	NaN	NaN	NaN	NaN	NaN	NaN
0.99962	1.0181	0.86603	0.73067	0.87366	0.90725	0.7932	0.87444	0.72459	0.71416	0.87347	0.91907	0.81565	0.88507	0.78375	0.6819	1.2087	0.48373	1.1687	1.4761	1.3341	1.3856	1.6684	1.5641	1.4543	1.4651	1.4654	1.5887	1.6229	1.7858	1.568	1.6692	1.5394	1.7321	1.5982	1.3633	0.95222	0.99985	0.98691	0.98038	0.96405	0.98824	0.94495	0.83701	0.76178	0.776	1.1152	1.0962	1.1371	1.2086
1.0302	0.98196	0.73306	0.7248	0.91851	0.98939	NaN	0.94347	0.85046	0.83726	NaN	0.96513	0.77262	0.85781	0.8074	0.52639	0.87074	0.29025	1.26	1.5972	1.2353	1.0903	2.176	1.6847	1.7362	1.5172	1.6162	1.7493	1.5238	NaN	1.5781	1.3827	1.9957	1.2945	1.0334	0.94563	0.88893	1.3246	1.0492	0.91836	1.072	1.0598	1.0124	1.109	0.90541	0.93337	1.3093	NaN	1.1373	1.138
NaN	NaN	NaN	NaN	NaN	NaN	NaN	NaN	NaN	NaN	NaN	NaN	NaN	NaN	NaN	NaN	NaN	NaN	NaN	NaN	NaN	NaN	NaN	NaN	NaN	NaN	NaN	NaN	NaN	NaN	NaN	NaN	NaN	NaN	NaN	NaN	NaN	NaN	NaN	NaN	NaN	NaN	NaN	NaN	NaN	NaN	NaN	NaN	NaN	NaN
1.0455	NaN	NaN	NaN	NaN	NaN	NaN	NaN	0.30149	NaN	NaN	NaN	NaN	NaN	NaN	NaN	NaN	NaN	NaN	1.4213	NaN	NaN	NaN	NaN	NaN	1.046	NaN	1.1875	0.85352	0.32125	NaN	NaN	NaN	NaN	NaN	NaN	1.0604	NaN	NaN	0.85104	NaN	NaN	0.72074	NaN	0.2461	NaN	NaN	NaN	NaN	NaN
1.1256	1.8372	1.6399	0.91346	1.1203	1.3815	1.3522	0.82408	0.80545	1.0963	1.2207	1.15	0.96834	1.2749	0.59231	0.87568	0.73324	0.54584	1.6875	2.126	1.4339	2.9219	3.1436	2.605	3.149	2.9531	2.3011	3.4285	3.4532	4.0425	1.702	3.1959	2.7156	2.7576	2.2517	2.6184	1.2695	1.7517	1.6892	2.0775	0.45351	2.8604	2.7956	1.2998	2.4004	1.3494	2.6756	2.9871	2.0993	2.2587
NaN	NaN	NaN	NaN	NaN	NaN	NaN	NaN	NaN	NaN	NaN	NaN	NaN	NaN	NaN	NaN	NaN	NaN	NaN	NaN	NaN	1.1428	NaN	NaN	NaN	NaN	NaN	NaN	NaN	NaN	NaN	NaN	NaN	NaN	NaN	NaN	NaN	NaN	1.8406	NaN	NaN	NaN	NaN	NaN	NaN	NaN	NaN	NaN	NaN	NaN
0.98086	1.1668	0.81027	1.2657	0.89248	0.97877	0.91152	1.1706	0.69622	0.953	1.0011	1.078	1.0877	1.1194	0.75643	0.75808	1.1217	0.76861	1.3598	1.5025	1.167	3.0015	1.9423	2.0419	1.2807	1.8354	1.8082	1.8843	1.8739	1.513	2.0985	2.383	1.7806	1.4848	1.2606	1.3272	0.99136	1.4147	1.5397	1.1351	1.4049	1.2564	1.5804	1.0273	1.1212	0.97782	1.7872	1.3418	1.4009	1.4624
1.1766	0.14161	NaN	NaN	NaN	NaN	NaN	NaN	NaN	NaN	NaN	NaN	NaN	NaN	NaN	NaN	NaN	NaN	1.3144	0.7633	NaN	NaN	NaN	0.27241	NaN	NaN	NaN	NaN	NaN	NaN	NaN	NaN	NaN	NaN	NaN	NaN	1.0882	0.22637	NaN	NaN	NaN	NaN	NaN	NaN	NaN	NaN	NaN	NaN	NaN	NaN
NaN	NaN	NaN	NaN	NaN	NaN	NaN	NaN	NaN	NaN	NaN	NaN	NaN	NaN	NaN	NaN	NaN	NaN	NaN	NaN	NaN	NaN	NaN	NaN	NaN	NaN	NaN	NaN	NaN	NaN	NaN	NaN	NaN	NaN	NaN	NaN	NaN	NaN	NaN	NaN	NaN	NaN	NaN	NaN	NaN	NaN	NaN	NaN	NaN	NaN
1.0637	NaN	NaN	NaN	NaN	NaN	NaN	NaN	NaN	NaN	NaN	NaN	NaN	NaN	NaN	NaN	NaN	NaN	NaN	NaN	NaN	NaN	NaN	NaN	NaN	NaN	NaN	NaN	NaN	NaN	NaN	NaN	NaN	NaN	NaN	NaN	NaN	NaN	NaN	NaN	NaN	NaN	NaN	NaN	NaN	NaN	NaN	NaN	NaN	NaN
NaN	NaN	NaN	NaN	NaN	NaN	NaN	NaN	NaN	NaN	NaN	NaN	NaN	NaN	NaN	NaN	NaN	NaN	NaN	NaN	NaN	NaN	NaN	NaN	NaN	NaN	NaN	NaN	NaN	NaN	NaN	NaN	NaN	NaN	NaN	NaN	NaN	NaN	NaN	NaN	NaN	NaN	NaN	NaN	NaN	NaN	NaN	NaN	NaN	NaN
1.0491	1.0079	0.89309	0.7366	0.89733	0.89685	0.83507	0.88724	0.74805	NaN	0.87568	0.89376	0.81146	0.83583	0.72573	0.55511	0.89902	0.30533	1.3031	1.4778	1.4456	1.3549	1.5809	1.5684	1.5175	1.5123	1.4628	1.5955	1.7033	1.8932	1.6044	1.5794	1.4395	1.471	NaN	1.069	1.0248	1.1356	1.0123	0.94728	0.94406	0.99923	NaN	0.84992	NaN	0.86282	1.1152	1.1235	1.0841	1.1508
NaN	NaN	NaN	NaN	NaN	NaN	0.88645	NaN	NaN	NaN	NaN	NaN	NaN	NaN	NaN	0.70204	NaN	NaN	1.4901	NaN	NaN	NaN	1.8257	NaN	1.5775	NaN	NaN	1.9269	1.6729	NaN	2.5901	NaN	NaN	NaN	NaN	1.6263	NaN	1.4557	NaN	NaN	NaN	NaN	NaN	NaN	NaN	NaN	NaN	NaN	1.6394	NaN
0.94591	1.3273	NaN	0.61147	1.0808	NaN	NaN	1.0039	NaN	NaN	NaN	1.2536	0.98974	NaN	0.96263	NaN	1.2119	0.67921	NaN	1.5743	1.3834	NaN	2.2354	1.7962	1.9075	1.9336	1.9297	1.9331	1.8993	2.0077	NaN	NaN	2.036	NaN	NaN	NaN	NaN	NaN	0.70976	NaN	1.2989	1.1279	1.2241	0.69556	NaN	NaN	NaN	1.3819	NaN	1.5761
NaN	NaN	NaN	NaN	NaN	1.0624	NaN	NaN	0.57453	NaN	NaN	NaN	NaN	NaN	NaN	NaN	NaN	NaN	NaN	NaN	NaN	NaN	NaN	NaN	NaN	NaN	NaN	NaN	NaN	NaN	NaN	1.8125	NaN	NaN	1.5534	NaN	NaN	NaN	0.85552	1.1137	NaN	NaN	NaN	NaN	0.8771	0.9974	NaN	NaN	NaN	NaN
NaN	NaN	NaN	NaN	NaN	NaN	NaN	NaN	NaN	NaN	NaN	NaN	NaN	NaN	NaN	NaN	NaN	NaN	NaN	NaN	NaN	NaN	NaN	NaN	NaN	NaN	NaN	NaN	NaN	NaN	NaN	NaN	NaN	NaN	NaN	NaN	NaN	NaN	NaN	NaN	NaN	NaN	NaN	NaN	NaN	NaN	NaN	NaN	NaN	NaN
NaN	1.4003	NaN	NaN	NaN	NaN	NaN	0.84717	0.6766	0.67509	NaN	NaN	1.0984	NaN	NaN	NaN	NaN	NaN	NaN	NaN	NaN	NaN	NaN	NaN	NaN	NaN	NaN	NaN	NaN	NaN	1.2047	NaN	NaN	NaN	NaN	NaN	NaN	NaN	NaN	NaN	NaN	NaN	NaN	NaN	NaN	NaN	NaN	NaN	NaN	NaN
0.98475	1.2561	0.94136	NaN	1.1218	1.1338	1.0025	1.1765	0.97814	0.98042	1.0545	1.1248	NaN	0.96181	0.86264	0.61536	0.98792	0.50868	1.3829	NaN	1.3467	NaN	1.9393	1.7894	2.1578	1.7875	1.8901	1.9154	1.4931	1.6904	1.8595	1.7632	1.6464	1.5666	1.3281	1.2864	1.0596	1.767	1.083	1.1979	1.3042	1.2773	1.2719	1.03	1.0436	1.298	1.2717	1.2827	1.4123	1.4957
NaN	NaN	NaN	NaN	NaN	NaN	NaN	NaN	NaN	NaN	NaN	NaN	NaN	NaN	NaN	NaN	NaN	NaN	1.4241	NaN	NaN	NaN	NaN	NaN	NaN	NaN	NaN	NaN	NaN	NaN	NaN	NaN	NaN	NaN	NaN	NaN	NaN	NaN	1.1376	NaN	NaN	NaN	NaN	NaN	NaN	NaN	NaN	NaN	NaN	NaN
NaN	NaN	NaN	NaN	NaN	NaN	NaN	NaN	NaN	NaN	NaN	NaN	NaN	NaN	NaN	NaN	NaN	NaN	NaN	NaN	NaN	NaN	NaN	NaN	NaN	NaN	NaN	NaN	NaN	NaN	NaN	NaN	NaN	NaN	NaN	NaN	NaN	NaN	NaN	NaN	NaN	NaN	NaN	NaN	NaN	NaN	NaN	NaN	NaN	NaN
NaN	NaN	NaN	NaN	NaN	NaN	NaN	NaN	NaN	NaN	NaN	NaN	NaN	NaN	NaN	NaN	NaN	NaN	NaN	NaN	NaN	NaN	NaN	NaN	NaN	NaN	NaN	NaN	NaN	NaN	NaN	NaN	NaN	NaN	NaN	NaN	NaN	NaN	NaN	NaN	NaN	NaN	NaN	NaN	NaN	NaN	NaN	NaN	NaN	NaN
NaN	NaN	NaN	NaN	NaN	NaN	NaN	NaN	NaN	NaN	NaN	NaN	NaN	NaN	NaN	NaN	NaN	NaN	NaN	NaN	NaN	NaN	NaN	NaN	NaN	NaN	NaN	NaN	NaN	NaN	NaN	NaN	NaN	NaN	NaN	NaN	NaN	NaN	NaN	NaN	NaN	NaN	NaN	NaN	NaN	NaN	NaN	NaN	NaN	NaN
0.91368	1.4347	1.2714	1.0476	1.2363	1.0521	0.91749	NaN	0.93086	0.99712	1.3187	1.1918	1.125	0.87839	1.0454	0.71463	1.8331	1.0883	NaN	2.6693	2.3431	2.197	NaN	1.7836	NaN	1.9816	1.9848	2.0714	NaN	1.6658	NaN	NaN	NaN	NaN	NaN	1.4608	NaN	1.6766	NaN	1.1273	1.1342	1.0709	NaN	NaN	1.9314	1.3548	NaN	NaN	1.6705	NaN
NaN	NaN	NaN	NaN	NaN	NaN	NaN	NaN	NaN	NaN	NaN	NaN	NaN	NaN	NaN	NaN	NaN	NaN	NaN	NaN	1.793	0.9438	NaN	NaN	NaN	NaN	NaN	NaN	0.46744	NaN	NaN	NaN	NaN	NaN	NaN	NaN	NaN	NaN	NaN	NaN	NaN	NaN	NaN	NaN	NaN	NaN	NaN	NaN	NaN	NaN
0.9369	0.94627	0.84271	0.70585	0.71722	0.82697	0.72992	0.74458	0.6415	0.59068	0.68864	0.56513	0.46318	0.42088	0.33117	0.16112	0.27313	0.079046	1.1749	1.5333	1.2494	1.4583	1.479	1.53	1.4272	1.4186	1.3683	1.4705	1.5837	1.6235	1.1854	1.0988	0.83488	0.57144	0.46996	0.29758	0.79754	1.2426	0.9483	0.95445	0.7409	0.9782	0.83296	0.80217	0.7418	0.71635	0.85659	0.83735	0.62818	0.54981
0.7328	1.0519	0.7587	0.66398	0.90006	NaN	0.5611	0.69707	NaN	NaN	0.37734	NaN	NaN	NaN	NaN	NaN	NaN	NaN	1.1333	1.1272	1.0052	1.593	NaN	NaN	1.2326	1.1086	1.347	0.71102	0.86069	NaN	NaN	NaN	NaN	0.68965	NaN	0.45513	NaN	NaN	NaN	NaN	NaN	NaN	NaN	NaN	NaN	NaN	NaN	NaN	NaN	NaN
0.97756	1.0735	0.90575	0.62668	0.81142	0.84096	0.79211	0.80811	0.51509	0.46736	NaN	NaN	NaN	0.7509	0.8508	NaN	NaN	NaN	NaN	NaN	NaN	NaN	NaN	NaN	NaN	NaN	NaN	NaN	NaN	NaN	NaN	NaN	NaN	NaN	NaN	NaN	0.94145	1.1388	1.0282	NaN	0.94145	NaN	0.8131	NaN	0.69465	NaN	NaN	NaN	NaN	1.1341
NaN	NaN	NaN	NaN	NaN	NaN	NaN	NaN	NaN	0.84816	NaN	NaN	NaN	NaN	NaN	NaN	NaN	NaN	NaN	NaN	NaN	0.8543	NaN	NaN	NaN	NaN	1.8741	NaN	NaN	2.1615	NaN	NaN	2.1564	NaN	NaN	NaN	NaN	NaN	NaN	NaN	NaN	1.1617	0.86368	NaN	NaN	NaN	NaN	1.428	NaN	NaN
0.8367	1.0085	0.56384	0.99045	1.0026	1.0444	0.71665	1.1491	1.0775	0.85831	0.82869	0.65039	1.0869	1.0208	0.67898	1.9106	1.5848	0.61149	1.1781	1.596	0.92917	0.84052	1.5077	1.9219	1.7967	1.6916	2.014	1.9642	1.1234	2.2063	1.8218	1.9775	2.9994	4.3096	3.5208	3.2751	0.85094	NaN	0.94806	0.81324	1.1657	1.2297	0.8172	1.4213	1.1022	1.2969	1.4246	1.6902	1.2207	1.8844
0.8367	1.2796	0.56384	0.99045	0.60816	1.1218	0.87503	0.94864	1.1568	0.79386	1.0889	1.2689	1.322	1.6225	1.5946	1.9106	4.0701	1.9642	1.1781	1.596	1.2364	0.84052	1.5077	1.9219	1.7967	1.6916	2.014	1.9642	1.1234	2.2063	2.5853	1.9775	2.9994	4.3096	3.5208	3.2751	1.0049	NaN	0.77296	1.1255	1.1657	1.0624	0.8172	1.4213	0.86818	1.3766	1.4762	1.5324	1.2207	1.8844
1.1437	1.1942	1.0759	0.85282	1.2672	1.039	1.0884	1.0049	0.98567	0.95734	0.6772	0.33338	1.3955	1.2535	1.118	1.3174	0.61706	0.60613	1.4277	1.7924	0.69826	0.77027	1.5077	1.7495	2.3611	1.3222	1.7018	1.914	1.1234	1.3965	1.2837	2.1489	2.1283	1.8337	3.5208	1.7166	1.2032	NaN	1.1473	0.97056	1.1395	1.3822	1.0833	1.15	0.86818	1.3383	1.1802	1.541	2.039	1.3804
0.9885	1.1214	0.97305	0.75204	1.0717	0.69418	0.85625	1.1654	0.53154	1.1265	1.1926	1.4099	1.8788	1.5553	1.6175	1.5519	1.8801	1.3418	NaN	NaN	NaN	1.1954	NaN	NaN	1.5324	1.8584	NaN	2.3952	1.9974	2.7192	3.1251	0.88322	3.2805	3.1351	2.0634	2.1389	1.087	NaN	NaN	0.94874	1.3204	0.84024	1.3191	1.2831	1.1428	1.3129	1.6078	1.862	2.5629	2.0457
0.91079	1.0129	0.89349	1.0725	0.68544	0.84624	0.69345	0.92811	1.1134	0.65725	0.69813	0.75712	0.73682	0.61804	0.60365	0.40371	0.89527	0.51432	1.1995	1.1599	1.4707	1.2758	1.3794	2.3687	1.6705	1.4627	1.7902	1.4404	1.6857	1.3838	1.4626	1.1345	0.94968	1.0644	1.2114	0.95921	0.96173	1.1195	1.1698	1.1979	0.98109	1.3806	1.0744	1.3713	0.88073	1.1327	1.306	0.99075	1.326	1.2341
1.0797	0.99789	0.68986	0.71557	NaN	1.0282	0.84896	1.1916	0.82003	0.66278	0.93122	0.91533	0.64986	0.65563	0.60894	0.38312	0.92821	0.39183	1.1232	1.4884	1.2153	0.58019	NaN	1.4196	2.2621	1.4075	1.7591	NaN	1.1232	1.3582	1.719	1.4741	1.0859	1.1278	0.97211	1.3928	1.0541	NaN	0.9443	0.75757	0.81651	0.85119	0.86234	0.89536	0.82787	0.9759	1.2941	0.96876	0.87696	1.2094
1.0797	NaN	NaN	0.71557	NaN	NaN	0.84896	NaN	0.82003	0.66278	0.93122	0.91533	NaN	NaN	0.60894	0.38312	NaN	0.39183	NaN	NaN	NaN	NaN	NaN	1.4196	NaN	NaN	1.7591	NaN	NaN	NaN	NaN	1.4741	NaN	NaN	0.97211	1.3928	1.0541	NaN	0.9443	0.75757	0.81651	NaN	0.86234	0.89536	0.82787	0.9759	NaN	0.96876	0.87696	1.2094
NaN	NaN	NaN	NaN	NaN	NaN	NaN	NaN	NaN	NaN	NaN	NaN	NaN	NaN	NaN	NaN	NaN	NaN	NaN	NaN	NaN	NaN	NaN	NaN	NaN	NaN	NaN	NaN	NaN	NaN	NaN	NaN	NaN	NaN	NaN	NaN	NaN	NaN	NaN	NaN	NaN	NaN	NaN	NaN	NaN	NaN	NaN	NaN	NaN	NaN
NaN	NaN	NaN	NaN	NaN	NaN	NaN	NaN	NaN	NaN	NaN	NaN	NaN	NaN	NaN	NaN	NaN	NaN	NaN	NaN	NaN	NaN	NaN	NaN	NaN	NaN	NaN	NaN	NaN	NaN	NaN	NaN	NaN	NaN	NaN	NaN	NaN	NaN	NaN	NaN	NaN	NaN	NaN	NaN	NaN	NaN	NaN	NaN	NaN	NaN
NaN	NaN	NaN	NaN	NaN	NaN	NaN	NaN	NaN	NaN	NaN	NaN	NaN	NaN	NaN	NaN	NaN	NaN	NaN	NaN	NaN	NaN	NaN	NaN	0.2759	NaN	NaN	0.6066	0.56574	NaN	0.47906	NaN	NaN	NaN	NaN	NaN	NaN	NaN	NaN	NaN	NaN	NaN	NaN	NaN	NaN	NaN	NaN	NaN	NaN	NaN
0.93677	1.2801	0.77462	NaN	0.89253	NaN	0.65302	1.4245	0.55354	0.7144	0.88049	0.94465	0.87217	1.0127	NaN	0.6144	2.2359	0.56488	1.414	NaN	0.81309	0.93788	NaN	1.5915	0.97219	1.456	1.9017	1.6874	1.5368	NaN	NaN	NaN	1.8335	NaN	2.2771	1.3334	0.81833	NaN	1.1818	NaN	NaN	1.3286	1.1287	1.0172	NaN	NaN	1.1986	NaN	1.2923	1.7813
NaN	NaN	1.1472	0.64268	1.3397	0.94946	1.1347	NaN	0.87497	0.87564	0.7466	1.1494	1.0961	0.96869	0.9534	0.38936	0.67764	0.23425	0.8355	NaN	1.1024	NaN	NaN	NaN	NaN	NaN	NaN	NaN	NaN	1.2409	2.3991	NaN	NaN	NaN	NaN	NaN	NaN	NaN	1.6993	1.1177	0.95191	1.5493	1.9687	NaN	1.4198	0.92634	1.796	1.5796	1.4864	1.5225
0.96163	1.1033	0.8119	0.7024	0.92598	0.85442	0.77939	0.93729	0.61847	0.65516	0.83081	0.77938	0.66737	0.93706	0.85726	0.54444	1.0446	0.56991	1.2772	1.2834	1.2226	0.77346	1.1678	1.2602	1.6334	1.6481	0.89442	1.5888	1.8212	1.0614	2.0459	1.6684	1.1499	2.0091	0.58054	1.1143	0.98011	1.0422	0.85931	0.66497	0.7157	1.1503	0.6837	0.55485	0.84601	0.55006	1.276	1.6689	0.93585	0.66827
0.90594	1.1634	0.95731	0.71247	1.0331	0.96363	0.89925	1.0572	0.91771	0.80828	0.95407	0.92135	0.99936	0.8206	0.77904	0.70113	1.3683	0.5918	1.2938	1.0496	1.3809	0.97811	1.5165	1.5094	1.2669	1.5836	1.7357	1.7687	1.5648	1.4884	0.96181	1.3714	1.7071	1.3581	1.1419	1.4145	0.97231	0.98353	0.94464	0.972	0.98265	1.264	0.96753	0.61838	0.74656	0.87838	1.077	1.1335	0.90592	0.99282
1.2702	0.69344	0.76008	0.3146	0.3619	0.70725	0.32299	0.60374	0.084666	0.16192	0.16747	0.13301	0.04772	NaN	0.17708	NaN	NaN	NaN	1.2307	1.1665	0.58925	1.4253	0.97154	1.0562	1.1269	1.1572	0.88833	1.2938	1.2051	0.48609	0.22054	0.24483	0.39963	0.072172	0.063794	0.053027	0.86146	1.6665	0.50729	0.62957	0.67885	0.80437	0.66335	0.16083	0.74401	0.3987	0.25796	0.59905	NaN	NaN
0.89588	1.1186	0.93137	0.29006	0.92037	0.70725	0.58507	0.60374	0.34165	0.32961	0.3812	0.60314	0.21574	NaN	0.17708	NaN	NaN	NaN	1.3289	0.85913	0.90221	1.1255	0.95696	1.0562	1.4255	1.7815	0.93266	1.3651	1.2051	1.3819	0.96194	0.73531	0.39963	0.2848	NaN	NaN	0.95319	1.6319	0.71493	1.1693	1.0312	0.80437	0.55609	0.36102	NaN	0.32901	0.77932	0.59905	NaN	NaN
NaN	1.3656	0.66529	1.077	NaN	1.2171	1.386	1.7399	2.591	1.9131	0.7099	0.8874	1.743	NaN	0.82203	0.70086	0.68976	NaN	3.4418	NaN	1.1088	1.5295	NaN	NaN	3.0731	2.2917	4.0151	3.2332	4.6899	5.6326	6.203	13.635	8.0511	NaN	5.0536	NaN	1.1043	NaN	0.86419	1.8046	0.89022	2.0378	NaN	3.9262	NaN	4.9646	NaN	3.2934	NaN	2.3636
NaN	NaN	NaN	NaN	NaN	NaN	NaN	NaN	NaN	NaN	NaN	NaN	NaN	NaN	NaN	NaN	NaN	NaN	NaN	NaN	NaN	NaN	NaN	NaN	NaN	NaN	NaN	NaN	NaN	NaN	NaN	NaN	NaN	NaN	NaN	NaN	NaN	NaN	NaN	NaN	NaN	NaN	NaN	NaN	NaN	NaN	NaN	NaN	NaN	NaN
NaN	0.49297	0.63568	NaN	0.2576	NaN	0.24214	NaN	NaN	NaN	NaN	NaN	NaN	NaN	NaN	NaN	NaN	NaN	NaN	NaN	NaN	NaN	NaN	NaN	NaN	NaN	NaN	NaN	NaN	NaN	NaN	NaN	NaN	NaN	NaN	NaN	NaN	NaN	NaN	NaN	NaN	NaN	NaN	NaN	NaN	NaN	NaN	NaN	NaN	NaN
NaN	NaN	NaN	NaN	NaN	NaN	NaN	NaN	NaN	NaN	NaN	NaN	NaN	NaN	NaN	NaN	NaN	NaN	1.2715	1.0358	NaN	1.0265	NaN	NaN	NaN	NaN	NaN	NaN	NaN	NaN	NaN	NaN	NaN	NaN	NaN	NaN	NaN	NaN	NaN	NaN	NaN	NaN	NaN	NaN	NaN	NaN	NaN	NaN	NaN	NaN
NaN	NaN	NaN	NaN	NaN	NaN	NaN	NaN	NaN	NaN	NaN	NaN	NaN	NaN	NaN	NaN	NaN	NaN	NaN	NaN	0.89215	0.55029	1.4514	1.1555	1.0658	1.033	1.0963	0.97134	0.52073	NaN	NaN	NaN	NaN	NaN	NaN	NaN	NaN	NaN	NaN	NaN	NaN	NaN	NaN	NaN	NaN	NaN	NaN	NaN	NaN	NaN
NaN	NaN	NaN	NaN	NaN	NaN	NaN	NaN	NaN	NaN	NaN	NaN	NaN	NaN	NaN	NaN	NaN	NaN	NaN	NaN	NaN	NaN	NaN	NaN	NaN	NaN	NaN	NaN	NaN	NaN	NaN	NaN	NaN	NaN	NaN	NaN	NaN	NaN	NaN	NaN	NaN	NaN	NaN	NaN	NaN	NaN	NaN	NaN	NaN	NaN
NaN	NaN	NaN	NaN	NaN	NaN	NaN	NaN	NaN	NaN	NaN	NaN	NaN	NaN	NaN	NaN	NaN	NaN	NaN	NaN	NaN	NaN	NaN	NaN	NaN	NaN	NaN	NaN	NaN	NaN	NaN	NaN	NaN	NaN	NaN	NaN	NaN	NaN	NaN	NaN	NaN	NaN	NaN	NaN	NaN	NaN	NaN	NaN	NaN	NaN
NaN	NaN	NaN	NaN	NaN	NaN	NaN	NaN	NaN	NaN	NaN	NaN	NaN	NaN	NaN	NaN	NaN	NaN	NaN	NaN	NaN	NaN	NaN	NaN	NaN	NaN	NaN	NaN	NaN	NaN	NaN	NaN	NaN	NaN	NaN	NaN	NaN	NaN	NaN	NaN	NaN	NaN	NaN	NaN	NaN	NaN	NaN	NaN	NaN	NaN
0.92729	1.0962	0.65494	0.76202	0.90091	0.78975	0.65527	0.67994	0.49466	0.51913	0.42466	0.47455	0.38692	0.36913	0.2437	0.16069	0.22847	0.11899	1.2114	1.7047	0.94922	0.83646	1.6267	1.6388	1.5487	1.4367	1.4732	1.4669	1.1451	0.96773	0.89068	0.67056	0.64546	0.49629	0.30808	0.24508	0.99708	1.3199	0.71146	0.92675	0.94355	1.0832	0.73299	0.72893	0.66769	0.70559	0.73139	0.5465	0.47441	0.40975
NaN	NaN	NaN	NaN	NaN	NaN	NaN	NaN	NaN	NaN	NaN	NaN	NaN	NaN	NaN	NaN	NaN	NaN	NaN	NaN	NaN	NaN	NaN	NaN	NaN	NaN	NaN	NaN	NaN	NaN	NaN	NaN	NaN	NaN	NaN	NaN	NaN	NaN	NaN	NaN	NaN	NaN	NaN	NaN	NaN	NaN	NaN	NaN	NaN	NaN
1.0047	1.0405	0.50533	0.67814	0.6216	0.47458	0.37337	0.29749	0.14693	0.085743	0.095753	NaN	NaN	NaN	NaN	NaN	NaN	NaN	1.2726	1.6717	0.93708	0.65309	1.5264	1.2914	1.2078	1.2362	1.0104	0.66328	0.47825	0.12317	0.039397	NaN	NaN	0.058256	NaN	NaN	0.8812	1.1781	0.70325	0.71948	0.7497	0.65353	0.40503	0.39121	0.2478	0.17977	0.1691	NaN	NaN	NaN
0.98293	NaN	0.77995	1.1876	1.2584	1.0612	1.0799	1.1451	1.0346	0.83595	0.95012	1.0756	1.3716	NaN	0.99162	NaN	1.2356	0.85693	1.3312	2.8636	NaN	NaN	NaN	2.1731	NaN	2.3084	NaN	NaN	1.4464	NaN	3.1882	2.2708	NaN	NaN	NaN	1.6451	0.92948	1.6309	0.94858	1.1285	0.99736	1.1329	1.0356	1.1566	1.4909	1.2367	1.6747	1.8008	1.9848	1.6632
NaN	NaN	NaN	NaN	NaN	NaN	NaN	NaN	NaN	NaN	NaN	NaN	NaN	NaN	NaN	NaN	NaN	NaN	NaN	NaN	NaN	NaN	NaN	NaN	NaN	NaN	NaN	NaN	NaN	NaN	NaN	NaN	NaN	NaN	NaN	NaN	NaN	NaN	NaN	NaN	NaN	NaN	NaN	NaN	NaN	NaN	NaN	NaN	NaN	NaN
0.92846	1.0223	0.86882	1.0218	0.6096	0.71625	0.68483	0.8049	1.2874	0.68016	NaN	NaN	NaN	0.57274	NaN	NaN	0.54538	NaN	1.2463	3.1848	0.59589	0.95065	1.9931	1.8593	1.1427	1.193	1.4804	1.3791	1.2886	1.2145	0.78929	1.069	0.93556	1.1418	0.74386	NaN	1.0997	1.347	1.3587	0.94046	0.71364	1.1926	0.99981	1.4824	0.8654	0.8291	1.2851	0.90593	0.61618	0.85612
NaN	NaN	NaN	NaN	NaN	NaN	NaN	NaN	NaN	NaN	NaN	NaN	NaN	NaN	NaN	NaN	NaN	NaN	NaN	NaN	NaN	NaN	NaN	NaN	NaN	NaN	NaN	NaN	NaN	NaN	NaN	NaN	NaN	NaN	NaN	NaN	NaN	NaN	NaN	NaN	NaN	NaN	NaN	NaN	NaN	NaN	NaN	NaN	NaN	NaN
NaN	NaN	NaN	NaN	NaN	NaN	NaN	NaN	NaN	NaN	NaN	NaN	0.62868	NaN	NaN	NaN	NaN	NaN	NaN	NaN	NaN	NaN	NaN	NaN	NaN	NaN	NaN	NaN	NaN	NaN	NaN	NaN	NaN	NaN	NaN	NaN	NaN	NaN	NaN	NaN	NaN	NaN	NaN	NaN	NaN	NaN	NaN	NaN	NaN	NaN
NaN	NaN	NaN	NaN	NaN	NaN	NaN	1.0595	0.71626	0.88804	1.0181	0.77978	NaN	NaN	NaN	NaN	NaN	NaN	NaN	NaN	NaN	NaN	NaN	NaN	NaN	NaN	NaN	NaN	NaN	NaN	NaN	NaN	NaN	NaN	NaN	NaN	NaN	NaN	NaN	NaN	NaN	NaN	NaN	NaN	NaN	NaN	NaN	NaN	NaN	NaN
0.84115	2.3239	1.1056	1.2246	NaN	2.2329	1.2985	1.2222	1.1968	1.6333	1.8141	1.2065	2.0114	0.97248	3.8112	2.7724	3.3515	3.1518	1.5493	1.8322	1.5978	2.2413	2.6099	2.0031	1.6463	2.0642	2.4002	2.0161	2.9441	2.3798	2.1821	1.9767	2.233	1.5041	2.342	2.0673	1.2771	2.1034	1.653	1.3488	1.7314	1.9287	1.8307	1.9646	1.4981	2.3084	1.03	1.4639	1.9015	2.6178
0.90851	NaN	0.68146	0.59435	1.2325	0.61144	0.71096	0.64696	NaN	NaN	NaN	NaN	NaN	0.5689	NaN	NaN	NaN	NaN	NaN	NaN	NaN	NaN	NaN	NaN	NaN	NaN	NaN	NaN	NaN	NaN	NaN	NaN	NaN	NaN	NaN	NaN	0.73866	0.716	NaN	NaN	0.79286	0.5982	NaN	NaN	NaN	NaN	0.9483	NaN	NaN	NaN
NaN	NaN	NaN	NaN	NaN	NaN	NaN	NaN	NaN	NaN	NaN	NaN	NaN	NaN	NaN	NaN	NaN	NaN	NaN	NaN	NaN	NaN	NaN	NaN	NaN	NaN	NaN	NaN	NaN	NaN	NaN	NaN	NaN	NaN	NaN	NaN	NaN	NaN	NaN	NaN	NaN	NaN	NaN	NaN	NaN	NaN	NaN	NaN	NaN	NaN
NaN	NaN	NaN	NaN	NaN	NaN	NaN	NaN	NaN	NaN	NaN	NaN	NaN	NaN	NaN	NaN	NaN	NaN	NaN	NaN	NaN	NaN	NaN	NaN	NaN	NaN	NaN	NaN	NaN	NaN	NaN	NaN	NaN	NaN	NaN	NaN	NaN	NaN	NaN	NaN	NaN	NaN	NaN	NaN	NaN	NaN	NaN	NaN	NaN	NaN
NaN	NaN	NaN	NaN	NaN	NaN	NaN	NaN	NaN	NaN	NaN	NaN	NaN	NaN	NaN	NaN	NaN	NaN	NaN	NaN	NaN	NaN	NaN	NaN	NaN	NaN	NaN	NaN	NaN	NaN	NaN	NaN	NaN	NaN	NaN	NaN	NaN	NaN	NaN	NaN	NaN	NaN	NaN	NaN	NaN	NaN	NaN	NaN	NaN	NaN
NaN	NaN	NaN	NaN	NaN	NaN	NaN	NaN	NaN	NaN	NaN	NaN	NaN	NaN	NaN	NaN	NaN	NaN	NaN	NaN	NaN	NaN	NaN	NaN	NaN	NaN	NaN	NaN	NaN	NaN	NaN	NaN	NaN	NaN	NaN	NaN	NaN	NaN	NaN	NaN	NaN	NaN	NaN	NaN	NaN	NaN	NaN	NaN	NaN	NaN
NaN	NaN	NaN	NaN	NaN	NaN	NaN	NaN	NaN	NaN	NaN	NaN	NaN	NaN	NaN	NaN	NaN	NaN	NaN	NaN	NaN	NaN	NaN	NaN	NaN	NaN	NaN	NaN	NaN	NaN	NaN	NaN	NaN	NaN	NaN	NaN	NaN	NaN	NaN	NaN	NaN	NaN	NaN	NaN	NaN	NaN	NaN	NaN	NaN	NaN
NaN	NaN	NaN	NaN	NaN	NaN	NaN	NaN	NaN	NaN	NaN	NaN	NaN	NaN	NaN	NaN	NaN	NaN	NaN	NaN	NaN	NaN	NaN	NaN	NaN	NaN	NaN	NaN	NaN	NaN	NaN	NaN	NaN	NaN	NaN	NaN	NaN	NaN	NaN	NaN	NaN	NaN	NaN	NaN	NaN	NaN	NaN	NaN	NaN	NaN
0.84969	NaN	NaN	1.8476	NaN	NaN	0.70032	NaN	1.4181	NaN	NaN	NaN	NaN	NaN	NaN	0.4925	NaN	NaN	NaN	NaN	NaN	NaN	NaN	NaN	NaN	NaN	NaN	NaN	NaN	NaN	NaN	NaN	NaN	NaN	NaN	NaN	NaN	NaN	NaN	NaN	NaN	NaN	NaN	NaN	NaN	NaN	NaN	NaN	NaN	NaN
NaN	NaN	NaN	NaN	NaN	NaN	NaN	NaN	NaN	NaN	NaN	NaN	NaN	NaN	NaN	NaN	NaN	NaN	NaN	NaN	NaN	NaN	NaN	NaN	NaN	NaN	NaN	NaN	NaN	NaN	NaN	NaN	NaN	NaN	NaN	NaN	NaN	NaN	NaN	NaN	NaN	NaN	NaN	NaN	NaN	NaN	NaN	NaN	NaN	NaN
0.84969	NaN	NaN	1.8476	NaN	NaN	0.70032	NaN	1.4181	NaN	NaN	NaN	NaN	NaN	NaN	0.4925	NaN	NaN	NaN	NaN	NaN	NaN	NaN	NaN	NaN	NaN	NaN	NaN	NaN	NaN	NaN	NaN	NaN	NaN	NaN	NaN	NaN	NaN	NaN	NaN	NaN	NaN	NaN	NaN	NaN	NaN	NaN	NaN	NaN	NaN
NaN	NaN	NaN	1.1366	0.72782	NaN	1.2221	NaN	NaN	1.1987	0.72297	NaN	NaN	0.85182	NaN	NaN	1.1811	NaN	1.0898	NaN	NaN	0.88948	1.6531	NaN	NaN	NaN	NaN	1.1236	NaN	NaN	NaN	NaN	NaN	NaN	1.589	NaN	NaN	1.4354	NaN	NaN	NaN	NaN	NaN	0.92282	1.4468	0.99275	NaN	0.96881	1.7004	NaN
NaN	NaN	NaN	NaN	NaN	NaN	NaN	NaN	NaN	NaN	NaN	NaN	NaN	NaN	NaN	NaN	NaN	NaN	NaN	NaN	NaN	NaN	NaN	NaN	NaN	NaN	NaN	NaN	NaN	NaN	NaN	NaN	NaN	NaN	NaN	NaN	NaN	NaN	NaN	NaN	NaN	NaN	NaN	NaN	NaN	NaN	NaN	NaN	NaN	NaN
0.90946	0.89264	0.75204	0.35603	0.83728	0.72215	0.68392	0.68865	0.26521	0.28043	NaN	0.28779	0.11271	0.06082	NaN	NaN	0.068483	NaN	1.2327	0.64834	1.8519	1.7777	1.4827	0.81585	1.1751	NaN	1.3775	1.4263	1.8228	1.0501	0.37717	0.17825	NaN	0.09231	NaN	NaN	0.74436	0.96765	0.97835	0.91972	0.96671	0.68619	0.87771	0.53216	0.44919	0.38982	0.285	0.11903	0.19114	0.10255
NaN	NaN	NaN	NaN	NaN	1.3779	1.3215	0.82552	NaN	NaN	0.92086	NaN	0.61461	NaN	0.78148	0.94011	1.7196	NaN	1.808	NaN	1.0364	NaN	NaN	1.3829	NaN	NaN	NaN	1.209	1.7112	NaN	2.4753	2.0668	1.6698	1.4573	1.5873	1.3731	NaN	NaN	NaN	NaN	NaN	NaN	NaN	NaN	NaN	NaN	NaN	NaN	NaN	NaN
NaN	NaN	NaN	NaN	NaN	NaN	NaN	NaN	NaN	NaN	NaN	NaN	NaN	NaN	NaN	NaN	NaN	NaN	NaN	NaN	NaN	NaN	NaN	NaN	NaN	NaN	NaN	NaN	NaN	NaN	NaN	NaN	NaN	NaN	NaN	NaN	NaN	NaN	NaN	NaN	NaN	NaN	NaN	NaN	NaN	1.0534	NaN	NaN	NaN	NaN
0.94653	0.95246	0.62229	0.8745	0.96049	NaN	NaN	0.78394	0.90477	NaN	0.92969	1.1067	0.89953	1.0025	NaN	0.7068	1.14	NaN	0.97884	1.7291	0.97266	NaN	NaN	NaN	1.0993	NaN	1.0467	1.9381	1.0969	2.5567	2.2071	2.3552	NaN	NaN	0.98085	1.4784	0.54592	1.6475	0.72492	NaN	1.0835	1.0409	0.66714	0.86813	0.84242	NaN	1.4049	1.8766	1.487	1.0378
NaN	NaN	NaN	NaN	NaN	NaN	NaN	NaN	NaN	NaN	NaN	NaN	NaN	NaN	NaN	NaN	NaN	NaN	NaN	NaN	NaN	NaN	NaN	NaN	NaN	NaN	NaN	NaN	NaN	NaN	NaN	NaN	NaN	NaN	NaN	NaN	NaN	NaN	NaN	NaN	NaN	NaN	NaN	NaN	NaN	NaN	NaN	NaN	NaN	NaN
NaN	NaN	NaN	NaN	NaN	NaN	NaN	NaN	NaN	NaN	NaN	NaN	NaN	NaN	NaN	NaN	NaN	NaN	NaN	NaN	NaN	NaN	NaN	NaN	NaN	NaN	NaN	NaN	NaN	NaN	NaN	NaN	NaN	NaN	NaN	NaN	NaN	NaN	NaN	NaN	NaN	NaN	NaN	NaN	NaN	NaN	NaN	NaN	NaN	NaN
NaN	NaN	NaN	NaN	NaN	NaN	0.85607	NaN	NaN	NaN	NaN	NaN	NaN	NaN	NaN	NaN	NaN	0.45392	NaN	NaN	NaN	NaN	NaN	NaN	NaN	NaN	NaN	NaN	NaN	NaN	NaN	NaN	NaN	NaN	NaN	NaN	NaN	NaN	NaN	NaN	NaN	NaN	NaN	NaN	NaN	1.1218	NaN	NaN	NaN	NaN
1.025	NaN	0.68105	0.88185	0.87371	NaN	NaN	NaN	0.97322	0.91534	0.90604	NaN	0.96235	1.0787	NaN	NaN	1.065	NaN	NaN	NaN	NaN	NaN	2.1571	2.1628	1.966	NaN	NaN	1.9582	1.3962	NaN	NaN	2.3585	NaN	NaN	NaN	1.6395	0.98495	NaN	NaN	NaN	1.1665	1.3599	NaN	0.97466	1.1298	NaN	1.442	1.5495	NaN	NaN
NaN	NaN	NaN	0.61326	0.78968	0.58493	0.61676	NaN	NaN	0.55598	NaN	NaN	0.42945	0.50421	NaN	0.55025	0.43498	NaN	NaN	NaN	NaN	NaN	NaN	NaN	NaN	NaN	NaN	NaN	NaN	NaN	NaN	NaN	NaN	NaN	NaN	NaN	NaN	NaN	NaN	NaN	NaN	NaN	NaN	NaN	NaN	NaN	NaN	NaN	NaN	NaN
NaN	NaN	NaN	NaN	NaN	NaN	NaN	NaN	NaN	NaN	NaN	NaN	NaN	NaN	NaN	NaN	NaN	NaN	NaN	NaN	NaN	NaN	NaN	NaN	NaN	NaN	NaN	NaN	NaN	NaN	NaN	NaN	NaN	NaN	NaN	NaN	NaN	NaN	NaN	NaN	NaN	NaN	NaN	NaN	NaN	NaN	NaN	NaN	NaN	NaN
1.0442	1.2535	0.69546	0.89787	0.86674	1.0275	0.87226	1.1135	1.0098	0.9342	0.98845	1.0186	0.95489	1.1842	0.9091	0.72893	1.1399	0.45169	1.1483	2.1341	0.91085	0.8503	2.2818	2.2204	1.7671	2.0332	1.8467	2.1299	1.3435	2.1029	2.2008	2.4668	1.9812	2.1368	1.1256	1.5723	0.94091	1.3347	0.72809	1.0495	1.1794	1.4212	0.92365	1.0443	1.0459	1.153	NaN	1.5852	1.6118	1.649
0.95769	NaN	0.77328	NaN	0.69308	0.53773	0.39734	0.42634	0.26407	NaN	NaN	NaN	NaN	NaN	NaN	NaN	NaN	NaN	NaN	NaN	NaN	NaN	NaN	NaN	NaN	NaN	NaN	NaN	NaN	NaN	NaN	NaN	NaN	NaN	NaN	NaN	1.1259	NaN	NaN	NaN	NaN	NaN	NaN	NaN	NaN	NaN	NaN	NaN	NaN	NaN
0.90078	1.0593	0.75056	0.66388	0.79136	0.65277	0.50392	0.4568	0.21096	0.14022	0.13556	0.044137	0.053679	NaN	0.042626	0.032145	0.057768	0.034007	1.1894	1.5037	1.1558	1.0682	1.4109	1.4102	1.3504	1.2023	1.1126	0.88895	0.65319	0.16818	NaN	NaN	NaN	0.055901	0.082576	NaN	1.0188	1.0721	0.86495	0.95697	0.80106	0.80265	0.58302	0.46859	0.29248	0.20067	0.15932	0.058986	0.073898	0.067164
0.87836	1.2089	0.67633	0.86193	0.84574	0.90838	0.82997	0.70012	0.65274	0.64205	0.59304	0.34171	0.20073	0.1916	NaN	NaN	0.12651	0.074587	1.0328	1.7355	1.6259	1.6085	2.0767	1.8569	1.1261	1.4771	NaN	1.762	1.2346	1.0338	0.62587	NaN	0.26315	NaN	NaN	NaN	0.89154	1.2667	1.1894	1.1397	1.2576	1.168	0.94844	0.77284	0.76489	0.62369	0.78709	0.39738	0.32057	0.23161
0.97561	1.0458	0.77462	0.82488	1.0955	0.78258	1.0965	NaN	0.66668	0.61396	NaN	0.91729	1.0508	0.5968	0.93954	0.52891	1.0669	1.057	1.1343	1.5663	1.2542	0.9058	NaN	1.8333	1.6641	1.6085	2.1844	1.0953	0.97373	1.4768	1.368	1.2003	NaN	1.0151	1.0629	1.0972	0.89605	1.1295	0.66096	0.98321	0.90384	1.1847	1.1274	1.9995	1.3987	NaN	0.94213	1.1845	NaN	1.418
NaN	1.2084	NaN	NaN	1.1006	NaN	NaN	NaN	NaN	NaN	NaN	0.82042	NaN	NaN	NaN	0.68839	1.7085	0.65259	1.2728	1.4771	1.6447	1.4853	NaN	2.1098	1.6122	NaN	NaN	NaN	NaN	1.5969	NaN	NaN	NaN	NaN	NaN	1.3267	NaN	NaN	1.265	NaN	NaN	1.3361	NaN	NaN	NaN	NaN	NaN	NaN	NaN	NaN
1.0096	NaN	NaN	0.87748	NaN	NaN	0.77284	0.91963	NaN	0.74573	NaN	NaN	1.3415	NaN	0.89491	0.68839	NaN	NaN	NaN	NaN	NaN	NaN	1.3827	NaN	1.6122	NaN	NaN	1.7133	NaN	1.5969	1.8647	1.6069	NaN	NaN	NaN	NaN	NaN	NaN	NaN	1.2591	1.1648	NaN	NaN	NaN	1.0603	1.1972	NaN	1.0217	0.84412	NaN
NaN	NaN	NaN	NaN	NaN	NaN	NaN	NaN	NaN	NaN	NaN	NaN	NaN	NaN	NaN	NaN	NaN	NaN	NaN	NaN	NaN	NaN	NaN	NaN	NaN	NaN	NaN	NaN	NaN	NaN	NaN	NaN	NaN	NaN	NaN	NaN	NaN	NaN	NaN	NaN	NaN	NaN	NaN	NaN	NaN	NaN	NaN	NaN	NaN	NaN
NaN	NaN	NaN	NaN	NaN	NaN	NaN	NaN	NaN	NaN	NaN	NaN	NaN	NaN	NaN	NaN	NaN	NaN	NaN	NaN	NaN	NaN	NaN	NaN	NaN	NaN	NaN	NaN	NaN	NaN	NaN	NaN	NaN	NaN	NaN	NaN	NaN	NaN	NaN	NaN	NaN	NaN	NaN	NaN	NaN	0.62433	NaN	NaN	NaN	NaN
0.64171	NaN	0.58613	NaN	NaN	0.4931	NaN	NaN	NaN	NaN	NaN	0.32714	NaN	NaN	NaN	0.22181	NaN	NaN	1.3561	1.8974	0.93045	0.93154	NaN	1.4774	1.1411	1.2051	NaN	0.9725	0.70461	0.63402	0.64098	0.54444	0.64062	0.61148	0.45206	NaN	NaN	0.76223	0.76964	0.86198	0.79968	0.89565	0.60953	NaN	NaN	NaN	0.58698	NaN	NaN	0.67915
NaN	NaN	NaN	NaN	1.1478	NaN	NaN	NaN	NaN	NaN	NaN	NaN	NaN	NaN	NaN	NaN	NaN	NaN	1.4248	NaN	NaN	NaN	NaN	NaN	NaN	NaN	1.5181	NaN	NaN	NaN	NaN	NaN	NaN	NaN	NaN	NaN	NaN	NaN	NaN	NaN	1.0875	NaN	NaN	NaN	NaN	1.2105	NaN	NaN	NaN	NaN
0.9144	0.9368	0.77551	1.1906	0.60385	0.9631	0.80866	0.76636	1.3212	1.1084	1.0951	1.469	1.6736	2.2415	1.753	1.0173	2.0788	NaN	1.3251	4.1051	0.66913	0.89854	2.3692	2.5487	1.2866	1.0985	1.7857	NaN	1.9919	3.3274	3.6328	6.0661	5.0546	4.5457	2.3796	3.2305	1.0858	NaN	0.86778	0.90489	0.89415	1.0213	0.90027	1.5171	1.3096	1.9422	2.2006	2.8173	2.4909	2.5676
NaN	NaN	NaN	NaN	NaN	NaN	NaN	NaN	NaN	NaN	NaN	NaN	NaN	NaN	NaN	NaN	NaN	NaN	NaN	NaN	NaN	NaN	NaN	NaN	NaN	NaN	NaN	NaN	NaN	NaN	NaN	NaN	NaN	NaN	NaN	NaN	NaN	NaN	NaN	NaN	NaN	NaN	NaN	NaN	NaN	NaN	NaN	NaN	NaN	NaN
NaN	NaN	NaN	NaN	NaN	NaN	NaN	NaN	NaN	NaN	NaN	NaN	NaN	NaN	NaN	NaN	NaN	NaN	NaN	NaN	NaN	NaN	NaN	NaN	NaN	NaN	NaN	NaN	NaN	NaN	NaN	NaN	NaN	NaN	NaN	NaN	NaN	NaN	NaN	NaN	NaN	NaN	NaN	NaN	NaN	NaN	NaN	0.33569	NaN	NaN
0.84138	0.98118	0.94412	0.73761	0.74666	0.72871	0.3416	0.40103	0.27107	NaN	NaN	NaN	NaN	NaN	NaN	NaN	NaN	NaN	1.03	2.0799	0.73921	1.1244	1.6865	0.99379	1.4765	1.2922	1.1304	0.81024	0.52181	NaN	NaN	NaN	NaN	NaN	NaN	NaN	1.0453	NaN	0.67612	0.81211	0.86932	1.1384	0.47934	0.53297	NaN	NaN	NaN	NaN	NaN	NaN
NaN	NaN	NaN	NaN	NaN	NaN	NaN	NaN	NaN	NaN	NaN	NaN	NaN	NaN	NaN	NaN	NaN	NaN	NaN	NaN	NaN	NaN	NaN	NaN	NaN	NaN	NaN	NaN	NaN	NaN	NaN	NaN	NaN	NaN	NaN	NaN	NaN	NaN	NaN	NaN	NaN	NaN	NaN	NaN	NaN	NaN	NaN	NaN	NaN	NaN
NaN	NaN	NaN	NaN	NaN	0.81091	NaN	NaN	NaN	NaN	NaN	NaN	NaN	NaN	NaN	NaN	NaN	NaN	NaN	1.6605	NaN	NaN	1.8167	2.0049	NaN	NaN	NaN	NaN	0.70545	NaN	NaN	NaN	NaN	NaN	NaN	NaN	NaN	NaN	NaN	NaN	1.0715	NaN	NaN	0.49866	NaN	NaN	NaN	NaN	NaN	NaN
0.96209	1.2565	0.80161	0.89863	0.99908	NaN	0.61143	0.50862	0.26415	0.21431	0.10473	NaN	NaN	NaN	NaN	NaN	NaN	NaN	1.3972	NaN	1.1782	0.73123	NaN	NaN	1.5993	1.8023	1.6948	1.0985	NaN	NaN	NaN	NaN	NaN	NaN	NaN	NaN	0.98158	1.0936	0.75618	1.1403	NaN	1.0637	0.47996	NaN	NaN	NaN	NaN	NaN	NaN	NaN
NaN	NaN	NaN	NaN	NaN	NaN	NaN	NaN	NaN	NaN	NaN	NaN	NaN	NaN	NaN	NaN	NaN	NaN	NaN	NaN	NaN	NaN	NaN	NaN	NaN	NaN	NaN	NaN	NaN	NaN	NaN	NaN	NaN	NaN	NaN	NaN	NaN	NaN	NaN	NaN	NaN	NaN	NaN	NaN	NaN	NaN	NaN	NaN	NaN	NaN
NaN	NaN	NaN	NaN	NaN	NaN	NaN	NaN	NaN	NaN	NaN	NaN	NaN	NaN	NaN	NaN	NaN	NaN	NaN	NaN	NaN	NaN	NaN	NaN	NaN	NaN	NaN	NaN	NaN	NaN	NaN	NaN	NaN	NaN	NaN	NaN	NaN	NaN	NaN	NaN	NaN	NaN	NaN	NaN	NaN	NaN	NaN	NaN	NaN	NaN
NaN	NaN	NaN	NaN	NaN	NaN	NaN	NaN	NaN	NaN	NaN	NaN	NaN	NaN	NaN	NaN	NaN	NaN	NaN	NaN	NaN	NaN	NaN	NaN	NaN	NaN	NaN	NaN	NaN	NaN	NaN	NaN	NaN	NaN	NaN	NaN	NaN	NaN	NaN	NaN	NaN	NaN	NaN	NaN	NaN	NaN	NaN	NaN	NaN	NaN
0.81554	1.2038	0.90878	1.0875	1.0376	1.2199	0.98462	1.1699	1.107	0.98808	1.0115	0.57122	0.24012	NaN	0.18529	0.44634	0.55584	NaN	0.83221	2.0057	1.0554	0.91179	1.6747	2.3033	1.7782	1.8971	1.7303	2.0966	1.585	1.3824	0.96708	0.54887	0.46429	0.29716	NaN	0.38409	0.89658	1.4791	1.0423	1.1682	NaN	1.2749	0.76669	NaN	1.6026	0.65013	1.1136	NaN	NaN	NaN
NaN	NaN	NaN	NaN	NaN	NaN	NaN	NaN	NaN	NaN	NaN	NaN	NaN	NaN	NaN	NaN	NaN	NaN	NaN	NaN	NaN	NaN	NaN	NaN	NaN	NaN	NaN	NaN	NaN	NaN	NaN	NaN	NaN	NaN	NaN	NaN	NaN	NaN	NaN	NaN	NaN	NaN	NaN	NaN	NaN	NaN	NaN	NaN	NaN	NaN
NaN	NaN	NaN	NaN	NaN	NaN	NaN	NaN	NaN	NaN	NaN	NaN	NaN	NaN	NaN	NaN	NaN	NaN	NaN	NaN	NaN	NaN	NaN	NaN	NaN	NaN	NaN	NaN	NaN	NaN	NaN	NaN	NaN	NaN	NaN	NaN	NaN	NaN	NaN	NaN	NaN	NaN	NaN	NaN	NaN	NaN	NaN	NaN	NaN	NaN
0.97753	1.1276	0.7476	NaN	0.84903	0.74845	NaN	NaN	NaN	NaN	0.12896	NaN	NaN	NaN	NaN	NaN	NaN	NaN	1.1966	1.7594	1.2573	1.106	NaN	NaN	1.4751	1.4731	1.1776	NaN	NaN	NaN	NaN	NaN	NaN	NaN	NaN	NaN	1.1	1.1814	0.82212	1.088	0.89636	0.84837	0.64731	0.44461	0.32002	NaN	0.18691	NaN	NaN	NaN
NaN	1.3169	1.1923	0.73343	1.053	0.86494	0.85449	1.0298	NaN	0.49229	0.47532	0.21963	NaN	NaN	NaN	NaN	NaN	NaN	1.3462	1.0387	1.1063	1.101	NaN	1.1131	1.4521	1.1773	1.3488	1.2259	1.3407	0.64193	0.36835	NaN	NaN	NaN	NaN	NaN	1.0591	1.1687	0.94428	NaN	1.0215	1.038	1.1057	1.3882	1.2574	0.89096	0.55319	NaN	NaN	NaN
NaN	1.4793	NaN	0.6222	0.95859	0.94548	NaN	0.95539	0.76748	NaN	0.97482	0.66309	0.99027	1.0101	0.92079	0.62257	1.1439	0.40804	1.398	1.5388	NaN	1.0547	1.5183	NaN	1.7125	1.562	NaN	1.3715	1.7601	1.7405	1.9701	1.7096	1.6788	1.5478	NaN	1.5023	1.0041	1.3014	1.0178	1.3798	1.0869	1.3062	1.4064	1.2196	NaN	1.2243	NaN	NaN	1.2071	1.1082
NaN	NaN	NaN	NaN	1.2139	NaN	NaN	NaN	NaN	NaN	NaN	NaN	NaN	NaN	NaN	NaN	NaN	NaN	NaN	NaN	NaN	NaN	NaN	NaN	NaN	NaN	NaN	NaN	NaN	NaN	NaN	NaN	NaN	NaN	NaN	NaN	NaN	NaN	NaN	NaN	NaN	NaN	NaN	NaN	NaN	NaN	NaN	NaN	NaN	NaN
0.88756	1.2859	0.87707	0.89348	0.80975	1.0246	0.80454	1.1235	0.73362	0.55801	0.81909	0.71607	NaN	0.39052	0.36978	NaN	0.34958	NaN	1.4018	NaN	1.6573	1.0758	2.157	1.5723	1.6658	NaN	1.834	NaN	1.7932	1.2214	1.6377	0.98434	0.80283	0.80287	0.56533	NaN	NaN	NaN	NaN	NaN	1.1315	1.1876	0.98232	1.4438	NaN	1.3246	1.0278	0.82026	0.75459	0.76822
NaN	1.0395	0.81668	NaN	0.90325	0.7608	0.64371	0.92352	0.42405	0.48493	0.69072	0.53425	NaN	NaN	NaN	NaN	NaN	NaN	1.312	1.1225	1.2545	0.90569	NaN	1.3463	1.2378	1.3075	1.2312	1.5439	1.1955	1.2579	0.80756	0.54927	0.40677	NaN	NaN	NaN	NaN	NaN	NaN	0.18704	NaN	NaN	NaN	NaN	NaN	NaN	NaN	0.11169	NaN	NaN
NaN	1.0395	0.81668	NaN	0.90325	0.7608	0.64371	0.92352	0.42405	0.48493	0.69072	0.53425	NaN	NaN	NaN	NaN	NaN	NaN	1.312	1.1225	1.2545	0.90569	NaN	1.3463	1.2378	1.3075	1.2312	1.5439	1.1955	1.2579	0.80756	0.54927	0.40677	NaN	NaN	NaN	NaN	NaN	NaN	0.18704	NaN	NaN	NaN	NaN	NaN	NaN	NaN	0.11169	NaN	NaN
NaN	NaN	NaN	NaN	NaN	NaN	NaN	NaN	NaN	NaN	NaN	NaN	NaN	NaN	NaN	NaN	NaN	NaN	1.363	NaN	NaN	NaN	NaN	NaN	NaN	NaN	NaN	NaN	NaN	NaN	NaN	NaN	NaN	NaN	NaN	NaN	NaN	NaN	NaN	NaN	NaN	NaN	NaN	NaN	NaN	NaN	NaN	NaN	NaN	NaN
0.96063	1.3278	0.88498	0.88628	1.0617	1.0927	NaN	1.3358	NaN	NaN	1.2317	NaN	NaN	1.0233	0.75238	0.66088	1.316	0.6456	NaN	NaN	NaN	NaN	NaN	NaN	NaN	NaN	NaN	NaN	NaN	NaN	NaN	NaN	NaN	NaN	NaN	NaN	0.87419	1.9302	NaN	NaN	NaN	NaN	0.9976	NaN	0.92044	NaN	NaN	0.68918	0.88816	1.2234
NaN	NaN	NaN	NaN	NaN	NaN	NaN	NaN	NaN	NaN	NaN	NaN	NaN	NaN	NaN	NaN	NaN	NaN	NaN	NaN	NaN	NaN	NaN	NaN	NaN	NaN	NaN	NaN	NaN	NaN	NaN	NaN	NaN	NaN	NaN	NaN	NaN	NaN	NaN	NaN	NaN	NaN	NaN	NaN	NaN	NaN	NaN	NaN	NaN	NaN
1.2759	0.74375	0.91794	0.84437	NaN	0.82448	0.6549	0.83872	NaN	NaN	0.85027	NaN	NaN	NaN	NaN	NaN	NaN	NaN	NaN	NaN	NaN	NaN	NaN	NaN	NaN	NaN	NaN	NaN	NaN	NaN	NaN	NaN	NaN	NaN	NaN	NaN	1.0577	0.77279	1.185	NaN	NaN	NaN	1.5094	0.92769	0.65408	1.5464	NaN	NaN	NaN	1.6395
NaN	NaN	NaN	NaN	NaN	NaN	NaN	NaN	NaN	NaN	NaN	NaN	NaN	NaN	NaN	NaN	NaN	NaN	NaN	NaN	1.5044	NaN	1.6132	NaN	NaN	NaN	NaN	1.8655	1.8107	NaN	1.8763	1.4841	1.4939	NaN	1.2569	0.97927	1.0035	0.94954	0.99913	1.0106	1.112	NaN	0.99829	0.6946	0.76402	0.94445	1.1679	1.0962	1.1368	1.2854
1.0397	NaN	0.99315	0.95822	1.1586	NaN	0.92339	1.0231	0.87677	0.70073	0.83376	0.84404	0.66495	0.5576	0.44958	NaN	NaN	0.16493	1.1049	2.2061	1.3258	1.1445	NaN	1.7538	NaN	1.7949	1.6988	1.73	1.5455	1.6462	1.3806	1.1879	NaN	0.78061	0.67007	0.43933	1.1475	NaN	0.79486	1.0306	1.2635	1.0439	0.84632	1.1814	NaN	1.1114	NaN	0.98931	0.77007	NaN
0.81413	1.1257	0.5435	0.68099	0.72921	0.51287	0.27673	0.28422	NaN	NaN	NaN	NaN	NaN	NaN	NaN	NaN	NaN	NaN	1.2469	1.8611	0.92217	0.72122	1.5559	1.6268	1.2332	1.3839	0.99156	0.7473	0.35794	NaN	NaN	NaN	NaN	NaN	NaN	NaN	1.293	1.1908	0.94941	0.73403	NaN	0.7279	NaN	0.27804	NaN	NaN	NaN	NaN	NaN	NaN
NaN	NaN	NaN	NaN	NaN	NaN	NaN	NaN	NaN	NaN	NaN	NaN	NaN	NaN	NaN	NaN	NaN	NaN	NaN	NaN	NaN	NaN	NaN	NaN	0.68772	0.91594	NaN	0.81206	1.6471	0.9497	NaN	NaN	NaN	NaN	1.2919	NaN	NaN	NaN	1.3298	0.72358	NaN	NaN	NaN	0.54362	NaN	NaN	NaN	NaN	NaN	NaN
NaN	NaN	NaN	NaN	NaN	NaN	NaN	NaN	NaN	NaN	NaN	NaN	NaN	NaN	NaN	NaN	NaN	NaN	NaN	NaN	NaN	NaN	NaN	NaN	NaN	NaN	NaN	NaN	NaN	NaN	NaN	NaN	NaN	NaN	NaN	NaN	NaN	NaN	NaN	NaN	NaN	NaN	NaN	NaN	NaN	NaN	NaN	NaN	NaN	NaN
1.0568	1.2416	1.0343	0.53316	1.2636	0.98543	0.801	0.9267	1.1061	0.86883	1.0004	0.83225	0.58733	0.61154	0.34561	0.16374	0.24897	0.095998	1.2976	1.1755	1.4382	0.99728	1.3159	1.0413	1.7907	1.7093	1.3169	1.2257	1.4653	1.4001	1.4509	0.79157	0.68543	0.38836	0.41785	0.39692	0.99002	0.87301	0.94063	0.75602	1.2209	0.84607	1.028	0.96461	0.62169	0.88975	0.70544	0.59134	1.0187	0.54851
1.0244	1.0122	NaN	0.76261	0.87813	0.92622	0.75195	NaN	NaN	0.56725	0.6071	0.47051	0.30883	0.17189	NaN	NaN	NaN	NaN	1.16	1.4822	2.1037	0.87664	NaN	1.5363	1.5016	1.5802	1.426	1.656	1.2626	1.1881	0.75101	0.52908	0.3105	NaN	NaN	NaN	0.92014	0.91704	0.77318	0.9376	0.86587	1.0338	0.75311	0.78801	0.73067	0.60071	0.78344	0.5305	0.34804	0.24802
NaN	NaN	NaN	NaN	NaN	NaN	NaN	NaN	NaN	NaN	NaN	NaN	NaN	NaN	NaN	NaN	NaN	NaN	NaN	NaN	NaN	NaN	NaN	NaN	NaN	NaN	NaN	NaN	NaN	NaN	NaN	NaN	NaN	NaN	NaN	NaN	NaN	NaN	NaN	NaN	NaN	NaN	NaN	NaN	NaN	NaN	NaN	NaN	NaN	NaN
1.0796	0.83313	0.59031	0.83502	1.015	0.66312	0.8411	0.86775	0.66469	0.77774	NaN	NaN	0.81305	1.2228	NaN	NaN	2.0242	0.94576	NaN	NaN	NaN	NaN	NaN	NaN	NaN	NaN	NaN	NaN	NaN	NaN	NaN	NaN	NaN	NaN	NaN	NaN	0.84961	NaN	0.89388	0.86525	NaN	0.82724	0.85902	NaN	0.98416	0.88719	NaN	1.4041	NaN	1.9739
NaN	NaN	NaN	NaN	NaN	NaN	NaN	NaN	NaN	NaN	NaN	NaN	NaN	NaN	NaN	1.4681	NaN	NaN	NaN	NaN	NaN	NaN	NaN	NaN	NaN	NaN	NaN	NaN	NaN	NaN	NaN	NaN	NaN	NaN	NaN	NaN	NaN	NaN	NaN	NaN	NaN	NaN	NaN	NaN	NaN	NaN	NaN	NaN	NaN	NaN
NaN	NaN	NaN	NaN	NaN	NaN	NaN	NaN	NaN	NaN	NaN	NaN	NaN	NaN	NaN	NaN	NaN	NaN	1.2695	NaN	NaN	NaN	NaN	NaN	1.065	1.6648	NaN	NaN	NaN	NaN	NaN	NaN	NaN	NaN	NaN	NaN	0.89066	NaN	NaN	NaN	1.7996	0.74675	NaN	NaN	NaN	0.64304	NaN	NaN	NaN	0.97713
NaN	1.0737	NaN	NaN	NaN	NaN	NaN	NaN	NaN	NaN	NaN	NaN	0.14856	NaN	NaN	0.13853	0.11127	NaN	NaN	NaN	1.5608	NaN	2.1629	NaN	1.2462	NaN	1.0807	NaN	1.5628	0.83335	0.73823	NaN	0.22619	NaN	NaN	NaN	NaN	NaN	NaN	NaN	NaN	NaN	NaN	0.67133	NaN	NaN	NaN	NaN	0.23294	NaN
1.0532	1.1443	NaN	0.86	NaN	NaN	NaN	0.78979	NaN	NaN	NaN	NaN	NaN	0.60361	NaN	NaN	NaN	NaN	1.7361	NaN	NaN	NaN	NaN	1.6808	1.8157	1.3998	NaN	1.2467	1.4851	1.741	NaN	NaN	1.0672	NaN	0.72418	NaN	1.0239	1.0698	0.77952	NaN	0.9688	1.1838	1.0805	1.2161	1.1219	0.73269	1.0562	0.79033	NaN	NaN
NaN	NaN	NaN	NaN	NaN	NaN	NaN	NaN	NaN	NaN	NaN	NaN	NaN	NaN	NaN	NaN	NaN	NaN	NaN	NaN	NaN	NaN	NaN	NaN	NaN	NaN	NaN	NaN	NaN	NaN	NaN	NaN	NaN	NaN	NaN	NaN	NaN	NaN	NaN	NaN	NaN	NaN	NaN	NaN	NaN	NaN	NaN	NaN	NaN	NaN
0.99031	NaN	0.58704	NaN	NaN	NaN	NaN	NaN	0.50074	NaN	NaN	NaN	NaN	0.13263	NaN	NaN	NaN	NaN	NaN	NaN	NaN	NaN	NaN	NaN	NaN	1.6605	1.6257	NaN	0.95496	NaN	NaN	NaN	NaN	NaN	NaN	NaN	NaN	NaN	NaN	NaN	NaN	NaN	0.70368	NaN	NaN	0.40659	NaN	NaN	NaN	NaN
0.97755	1.1708	0.63946	0.81557	0.97505	0.91752	0.73782	0.74655	0.61325	NaN	0.3595	NaN	0.11796	NaN	NaN	NaN	NaN	NaN	0.82548	NaN	NaN	NaN	1.3272	1.2336	1.5745	NaN	1.6739	1.2602	NaN	2.4586	NaN	0.28875	NaN	NaN	NaN	NaN	0.9884	1.2461	NaN	NaN	NaN	NaN	NaN	NaN	NaN	NaN	0.32974	NaN	NaN	0.13723
NaN	NaN	NaN	NaN	NaN	NaN	NaN	NaN	NaN	NaN	NaN	NaN	NaN	NaN	NaN	NaN	NaN	NaN	NaN	NaN	NaN	NaN	NaN	NaN	NaN	1.6858	NaN	1.5523	NaN	NaN	0.34599	NaN	0.22477	NaN	NaN	NaN	NaN	NaN	NaN	NaN	NaN	NaN	NaN	NaN	NaN	NaN	NaN	NaN	0.12714	NaN
1.0371	0.76069	1.0535	0.69661	0.99804	0.99468	0.88333	0.87261	0.8588	0.96402	NaN	0.78723	0.83135	0.81675	0.71133	0.38076	0.61215	NaN	1.3618	1.0729	1.3623	NaN	1.1866	1.6398	1.4835	1.8206	1.6871	NaN	1.8899	1.8747	1.3501	1.834	1.5068	1.8144	0.83402	0.96569	1.1873	1.4162	1.215	0.75924	NaN	0.85905	1.0238	NaN	NaN	0.74963	NaN	0.68578	NaN	1.3142
NaN	NaN	NaN	NaN	NaN	NaN	NaN	NaN	NaN	NaN	NaN	NaN	NaN	NaN	NaN	NaN	NaN	NaN	NaN	NaN	NaN	NaN	NaN	NaN	NaN	NaN	NaN	NaN	NaN	NaN	NaN	NaN	NaN	NaN	NaN	NaN	NaN	NaN	NaN	NaN	NaN	NaN	NaN	NaN	NaN	NaN	NaN	NaN	NaN	NaN
NaN	NaN	NaN	NaN	NaN	NaN	NaN	NaN	NaN	NaN	NaN	NaN	NaN	NaN	NaN	NaN	NaN	NaN	NaN	NaN	NaN	NaN	NaN	NaN	NaN	NaN	NaN	NaN	NaN	NaN	NaN	NaN	NaN	NaN	NaN	NaN	NaN	NaN	NaN	NaN	NaN	NaN	NaN	NaN	NaN	NaN	NaN	NaN	NaN	NaN
1.0235	0.11044	NaN	NaN	NaN	NaN	NaN	NaN	NaN	NaN	NaN	NaN	NaN	NaN	NaN	NaN	NaN	NaN	1.2845	0.14879	0.093936	NaN	NaN	NaN	NaN	NaN	NaN	NaN	NaN	NaN	NaN	NaN	NaN	NaN	NaN	NaN	NaN	NaN	NaN	NaN	NaN	NaN	NaN	NaN	NaN	NaN	NaN	NaN	NaN	NaN
NaN	NaN	1.2036	0.61746	NaN	0.74183	0.61708	NaN	NaN	NaN	NaN	NaN	NaN	NaN	NaN	NaN	NaN	NaN	1.2091	0.91203	2.4265	2.6808	NaN	1.0129	0.7236	NaN	1.0686	NaN	0.90199	0.92573	NaN	0.60302	NaN	NaN	NaN	NaN	NaN	NaN	NaN	NaN	NaN	NaN	NaN	NaN	NaN	NaN	NaN	NaN	NaN	NaN
NaN	NaN	1.2036	0.61746	NaN	0.74183	0.61708	NaN	NaN	NaN	NaN	NaN	NaN	NaN	NaN	NaN	NaN	NaN	1.2091	0.91203	2.4265	2.6808	NaN	1.0129	0.7236	NaN	1.0686	NaN	0.90199	0.92573	NaN	0.60302	NaN	NaN	NaN	NaN	NaN	NaN	NaN	NaN	NaN	NaN	NaN	NaN	NaN	NaN	NaN	NaN	NaN	NaN
NaN	1.035	0.90942	NaN	NaN	NaN	NaN	NaN	NaN	NaN	NaN	NaN	NaN	NaN	NaN	NaN	NaN	NaN	NaN	NaN	NaN	NaN	NaN	NaN	NaN	NaN	NaN	NaN	1.108	NaN	NaN	NaN	NaN	NaN	NaN	NaN	NaN	NaN	NaN	NaN	NaN	NaN	NaN	NaN	NaN	NaN	NaN	NaN	NaN	NaN
NaN	NaN	NaN	NaN	1.0249	0.97327	NaN	0.86568	NaN	NaN	0.59595	NaN	NaN	NaN	NaN	NaN	NaN	NaN	1.2261	1.8549	NaN	1.2924	NaN	1.7756	1.664	NaN	1.3241	1.4061	NaN	NaN	NaN	NaN	NaN	NaN	NaN	NaN	NaN	NaN	1.47	NaN	1.1089	NaN	NaN	0.70239	NaN	0.66392	NaN	NaN	NaN	NaN
0.74521	NaN	1.5149	NaN	0.32005	NaN	0.3128	NaN	NaN	NaN	0.10862	NaN	NaN	0.01089	0.23522	NaN	0.18561	0.08464	0.98082	NaN	1.4992	2.4553	NaN	NaN	NaN	NaN	NaN	NaN	NaN	NaN	NaN	NaN	NaN	NaN	1.3707	0.029052	NaN	NaN	NaN	NaN	0.099851	0.0071471	1.3359	0.20024	NaN	NaN	0.13075	NaN	NaN	NaN
1.0926	1.1203	0.6456	NaN	NaN	NaN	NaN	0.29308	NaN	NaN	NaN	NaN	NaN	NaN	NaN	NaN	NaN	NaN	1.2277	1.0525	0.75239	0.67499	0.9914	0.95428	1.0789	1.0598	1.0218	0.50005	NaN	NaN	NaN	NaN	NaN	NaN	NaN	NaN	1.2844	NaN	0.78893	NaN	NaN	0.72612	NaN	NaN	NaN	NaN	NaN	NaN	NaN	NaN
0.8535	1.219	1.0108	1.0852	0.99623	1.032	0.97352	1.2234	0.85853	0.85826	0.97634	1.1039	0.95703	1.0848	0.81601	0.91903	1.2598	0.46231	1.3688	2.0471	1.7634	1.0657	2.5915	2.0703	1.809	1.759	1.8328	1.9167	1.457	2.6525	2.3596	2.1555	1.7215	2.1752	1.6216	2.0918	1.0622	1.3446	1.087	1.0479	1.0505	1.1869	0.87578	1.0795	0.89032	0.90321	1.307	1.4598	1.5661	1.6144
1.2692	1.192	0.73858	NaN	NaN	1.0786	0.60161	1.1587	NaN	0.44678	0.67088	1.0859	0.84166	NaN	0.7029	NaN	NaN	0.97569	1.627	1.9066	0.90456	0.50158	NaN	1.4516	4.4457	1.5435	1.7659	2.3588	1.5601	1.8048	1.6444	0.66812	1.6586	2.2285	1.7705	1.3099	0.98343	1.431	0.74865	1.3512	0.99118	0.8664	0.28559	1.5343	NaN	1.3115	0.99436	0.95045	NaN	NaN
0.94655	0.76609	0.6713	0.6139	0.79063	0.77552	0.82902	0.75683	0.76594	0.66268	0.75566	0.9454	0.90622	0.85592	0.65786	0.55434	NaN	0.32626	0.94044	1.042	1.0952	1.3511	NaN	NaN	NaN	1.8575	1.3448	1.5178	1.5979	1.7756	1.6431	NaN	1.5355	NaN	NaN	1.2459	0.63584	0.83039	0.87708	1.0578	NaN	0.92624	NaN	NaN	0.66787	0.98382	1.02	1.2602	0.91016	1.0846
0.79336	1.1346	NaN	NaN	1.0022	NaN	0.82356	NaN	NaN	NaN	0.91425	0.89912	0.92809	0.91538	0.9521	NaN	1.3229	0.64083	0.92429	NaN	1.4448	NaN	1.2278	1.0557	1.3349	1.4119	1.5258	NaN	1.7007	1.61	NaN	1.9501	NaN	1.7892	1.7206	NaN	1.0369	0.96299	1.2592	1.151	0.98178	1.0745	1.0008	1.2042	NaN	NaN	2.1558	NaN	0.92806	1.4377
0.88217	0.96764	0.76845	NaN	0.8639	NaN	0.73699	0.91453	0.68015	NaN	NaN	0.40503	NaN	NaN	NaN	NaN	NaN	NaN	NaN	NaN	NaN	NaN	NaN	NaN	NaN	NaN	NaN	NaN	NaN	NaN	NaN	NaN	NaN	NaN	NaN	NaN	NaN	NaN	NaN	NaN	NaN	NaN	NaN	NaN	NaN	NaN	NaN	NaN	NaN	NaN
0.98391	1.4295	0.80146	0.89396	NaN	NaN	0.8601	1.0038	0.83043	0.91594	1.4011	NaN	NaN	NaN	NaN	NaN	NaN	NaN	1.4935	1.6585	0.9209	0.83174	2.3817	2.0479	1.8034	1.8453	2.1222	NaN	1.631	2.1119	1.8295	2.348	NaN	NaN	NaN	NaN	1.0358	1.2215	0.81298	0.93865	NaN	1.3794	1.024	1.0763	1.0898	NaN	1.3093	NaN	1.7066	1.7429
NaN	NaN	NaN	NaN	NaN	NaN	NaN	NaN	NaN	NaN	NaN	NaN	NaN	NaN	NaN	NaN	NaN	NaN	NaN	NaN	NaN	NaN	NaN	NaN	NaN	NaN	NaN	NaN	NaN	NaN	NaN	NaN	NaN	NaN	NaN	1.0929	NaN	NaN	NaN	NaN	NaN	NaN	NaN	NaN	NaN	NaN	NaN	NaN	NaN	NaN
NaN	NaN	NaN	NaN	NaN	NaN	NaN	NaN	NaN	NaN	NaN	NaN	NaN	NaN	NaN	NaN	NaN	NaN	NaN	NaN	NaN	NaN	NaN	NaN	NaN	NaN	1.3769	NaN	NaN	NaN	1.5311	1.5009	1.3122	1.3219	1.3437	NaN	NaN	NaN	NaN	NaN	NaN	NaN	NaN	NaN	NaN	NaN	NaN	NaN	NaN	NaN
0.92359	1.3079	0.86571	0.52716	1.1357	0.9909	1.2432	1.2172	0.44472	0.63926	1.1355	1.2771	0.83356	NaN	0.67748	0.84753	1.3601	0.46502	1.3655	0.8135	1.9215	1.1841	1.7423	1.2181	2.3892	2.2143	2.3288	1.8836	1.5052	1.8235	2.1287	1.5289	1.7148	1.2385	1.9177	1.6393	1.1917	NaN	0.88834	1.1689	1.3053	0.79448	0.67003	0.8456	0.89518	0.88092	1.0642	0.9508	NaN	1.1649
NaN	NaN	NaN	0.52716	1.1357	NaN	NaN	NaN	NaN	NaN	1.1355	NaN	NaN	NaN	0.67748	0.84753	1.3601	NaN	1.3655	0.8135	1.9215	1.1841	1.7423	1.2181	2.3892	2.2143	NaN	1.8836	1.5052	1.8235	2.1287	1.5289	1.7148	NaN	1.9177	1.6393	NaN	NaN	NaN	NaN	1.3053	NaN	0.67003	NaN	NaN	0.88092	NaN	NaN	NaN	NaN
1.0625	1.3713	0.69418	0.85034	0.91241	1.0915	0.67206	1.1514	1.0231	0.98701	1.1668	1.1999	1.1905	1.2143	0.87416	0.73742	1.4658	0.74432	0.77912	1.7918	1.4289	0.79274	2.2306	1.9232	1.3271	1.2612	1.2563	1.7813	1.4287	1.5976	1.6842	1.5908	1.6066	1.4209	1.621	1.1635	0.55435	2.2779	1.3877	1.0801	1.0373	1.1501	1.0755	0.98295	0.99004	1.0465	1.0469	2.1665	1.6674	1.1961
NaN	0.99536	0.87878	NaN	NaN	NaN	0.71663	0.76749	0.47244	NaN	NaN	NaN	NaN	NaN	0.31572	NaN	0.24168	NaN	1.2792	NaN	NaN	1.3625	NaN	NaN	1.377	NaN	1.2425	NaN	NaN	NaN	NaN	NaN	NaN	NaN	NaN	0.2566	NaN	NaN	NaN	0.88625	NaN	NaN	NaN	NaN	NaN	NaN	NaN	NaN	0.57929	0.51853
NaN	NaN	NaN	NaN	NaN	NaN	NaN	NaN	NaN	NaN	NaN	NaN	NaN	NaN	NaN	NaN	NaN	NaN	NaN	NaN	NaN	NaN	NaN	NaN	NaN	NaN	NaN	NaN	NaN	NaN	NaN	NaN	NaN	NaN	NaN	NaN	NaN	NaN	NaN	NaN	NaN	NaN	NaN	NaN	NaN	NaN	NaN	NaN	NaN	NaN
NaN	NaN	NaN	NaN	NaN	NaN	NaN	NaN	NaN	NaN	NaN	NaN	NaN	NaN	NaN	NaN	NaN	NaN	NaN	NaN	NaN	NaN	NaN	NaN	NaN	NaN	NaN	NaN	NaN	NaN	NaN	NaN	NaN	NaN	NaN	NaN	NaN	NaN	NaN	NaN	NaN	NaN	NaN	NaN	NaN	NaN	NaN	NaN	NaN	NaN
1.5664	0.89418	0.92812	0.71014	0.99969	0.86891	0.65244	NaN	NaN	NaN	NaN	NaN	NaN	NaN	NaN	NaN	NaN	NaN	1.6848	1.9945	1.5016	0.87018	NaN	NaN	NaN	1.5597	1.5642	0.66792	NaN	NaN	NaN	NaN	NaN	NaN	NaN	NaN	NaN	NaN	NaN	NaN	NaN	NaN	NaN	NaN	NaN	NaN	NaN	NaN	NaN	NaN
0.89785	0.90563	0.63172	0.42795	0.78324	0.32363	0.23308	0.13849	NaN	0.12568	NaN	NaN	NaN	NaN	NaN	NaN	NaN	NaN	1.2153	0.95953	0.92687	0.45339	NaN	0.55187	0.58534	0.71975	0.37803	NaN	NaN	NaN	NaN	NaN	NaN	NaN	NaN	NaN	0.95796	0.78014	0.4551	0.45963	0.72944	0.32329	NaN	0.23947	NaN	NaN	NaN	NaN	NaN	NaN
0.94055	1.0825	0.87595	1.1424	0.21925	0.78867	0.99702	0.97134	1.1973	0.78927	0.47361	NaN	0.43925	1.1341	0.38104	0.45873	0.52865	NaN	1.4531	4.6802	1.2556	3.5177	NaN	4.8464	2.1561	1.0678	2.2754	2.8743	3.4174	2.7648	1.7734	4.6544	4.3712	3.0983	3.1875	2.1437	0.88821	2.1853	1.7169	1.7433	0.49432	2.0029	1.5804	2.8464	1.9766	1.6853	0.93908	1.5785	2.1366	2.9151
1.048	0.83029	0.92226	0.55106	0.73093	0.76342	0.88272	0.82875	0.51181	0.70334	0.8813	0.77517	0.82012	0.83025	0.79958	0.65546	0.98128	0.36317	1.2496	0.99143	1.2708	1.1691	1.5114	1.2812	1.2507	1.3593	1.1662	1.2174	1.5004	1.5934	1.6085	1.3372	1.6109	1.2972	1.4988	1.3397	1.0478	1.1856	0.79506	0.92768	0.76947	0.84402	1.0692	0.70798	0.77603	0.74144	1.1138	1.0391	1.0966	1.2892
NaN	0.54868	0.34386	NaN	NaN	NaN	0.18195	0.21049	NaN	0.1614	NaN	0.21488	0.24399	0.56775	NaN	0.90994	1.4996	0.78425	1.2701	1.3007	NaN	0.39148	NaN	0.51559	0.38425	0.41983	0.31576	NaN	NaN	0.35682	0.37997	0.8189	0.95169	1.3317	1.1614	1.3903	0.92434	NaN	NaN	0.50544	0.48593	0.59891	0.31912	0.3151	NaN	0.32512	0.49205	1.0723	1.8203	2.3278
NaN	NaN	NaN	NaN	NaN	NaN	NaN	NaN	NaN	NaN	NaN	NaN	NaN	NaN	NaN	NaN	NaN	NaN	NaN	NaN	NaN	NaN	NaN	NaN	NaN	NaN	NaN	NaN	0.18373	NaN	NaN	NaN	NaN	NaN	NaN	NaN	NaN	NaN	NaN	NaN	NaN	NaN	NaN	NaN	NaN	NaN	NaN	NaN	NaN	NaN
NaN	NaN	NaN	NaN	NaN	NaN	NaN	NaN	NaN	NaN	NaN	NaN	NaN	NaN	NaN	NaN	NaN	NaN	1.4195	NaN	NaN	NaN	NaN	NaN	NaN	NaN	NaN	NaN	NaN	NaN	NaN	NaN	NaN	NaN	NaN	NaN	NaN	NaN	NaN	NaN	NaN	NaN	NaN	NaN	NaN	NaN	NaN	NaN	NaN	2.1065
0.91293	1.4244	NaN	1.3343	0.91477	1.0534	1.099	1.1805	NaN	0.94504	0.7855	0.63184	0.81449	0.87843	0.9049	NaN	1.349	0.77881	NaN	2.8954	1.3956	1.5876	NaN	3.5845	2.4157	2.0723	2.8596	2.7508	NaN	1.7847	2.5457	2.9081	NaN	2.8506	NaN	NaN	0.72741	NaN	1.4581	1.2232	1.1356	NaN	1.5202	NaN	1.5326	2.1215	0.97635	1.2841	NaN	1.9623
NaN	NaN	NaN	NaN	NaN	NaN	NaN	NaN	NaN	NaN	NaN	NaN	0.88943	1.0163	NaN	NaN	NaN	NaN	NaN	NaN	NaN	NaN	NaN	NaN	NaN	NaN	NaN	NaN	NaN	NaN	NaN	NaN	NaN	NaN	NaN	NaN	NaN	NaN	NaN	NaN	NaN	NaN	NaN	NaN	NaN	NaN	NaN	NaN	NaN	NaN
NaN	0.84696	0.99785	NaN	1.6331	1.7796	1.4012	2.0517	1.5415	2.0412	1.2571	1.7929	NaN	1.5305	0.69723	0.48515	NaN	NaN	NaN	NaN	NaN	NaN	1.8612	3.939	2.7707	1.7751	2.0558	3.2615	3.4909	2.309	NaN	1.5347	NaN	1.1844	NaN	0.48384	0.99142	NaN	0.91293	NaN	1.2718	1.9728	NaN	NaN	1.0069	1.0922	2.3244	2.014	1.2688	1.2434
1.0887	0.40796	1.7058	0.1367	1.0345	0.72299	0.8623	0.65601	NaN	NaN	0.41287	0.19637	0.1122	NaN	NaN	NaN	NaN	NaN	1.0092	NaN	2.2754	2.0124	NaN	0.1026	0.72854	0.54408	0.1645	0.45553	1.5705	0.85823	NaN	NaN	NaN	NaN	0.062158	NaN	1.1281	NaN	1.5858	0.8831	0.40072	NaN	1.0404	0.52524	NaN	NaN	0.30782	NaN	NaN	NaN
0.9668	0.86611	0.57949	0.40762	0.72895	NaN	0.3513	0.42687	0.44037	0.48442	0.57247	0.98711	NaN	1.2557	1.3752	1.0735	1.5789	1.4019	NaN	2.0122	1.2192	NaN	NaN	0.68995	0.95819	NaN	0.73047	0.89343	NaN	NaN	NaN	NaN	1.9796	2.442	NaN	2.8145	NaN	NaN	0.85926	0.74258	0.76472	0.69938	0.72799	0.53208	0.65357	0.82918	0.87167	0.95417	1.0272	1.522
NaN	NaN	NaN	NaN	NaN	NaN	NaN	NaN	NaN	NaN	NaN	NaN	NaN	NaN	NaN	NaN	NaN	NaN	NaN	NaN	NaN	NaN	NaN	NaN	NaN	NaN	NaN	NaN	NaN	NaN	NaN	NaN	NaN	NaN	NaN	NaN	NaN	NaN	NaN	NaN	NaN	NaN	NaN	NaN	NaN	NaN	NaN	NaN	NaN	NaN
NaN	NaN	NaN	NaN	NaN	NaN	NaN	NaN	NaN	NaN	NaN	NaN	NaN	NaN	NaN	NaN	NaN	NaN	NaN	NaN	NaN	NaN	NaN	NaN	NaN	NaN	NaN	NaN	NaN	NaN	NaN	NaN	NaN	NaN	NaN	NaN	NaN	NaN	NaN	NaN	NaN	NaN	NaN	NaN	NaN	NaN	NaN	NaN	NaN	NaN
NaN	NaN	NaN	NaN	NaN	1.4689	1.3403	NaN	NaN	1.2234	NaN	1.1444	1.3268	NaN	NaN	0.95151	1.7711	NaN	NaN	NaN	NaN	NaN	NaN	NaN	NaN	NaN	NaN	NaN	NaN	1.5446	NaN	NaN	NaN	NaN	NaN	NaN	NaN	NaN	NaN	NaN	NaN	NaN	NaN	NaN	NaN	NaN	NaN	NaN	NaN	NaN
NaN	NaN	NaN	NaN	NaN	NaN	NaN	NaN	NaN	NaN	NaN	NaN	NaN	NaN	NaN	NaN	NaN	NaN	NaN	NaN	NaN	NaN	NaN	NaN	NaN	NaN	NaN	NaN	NaN	NaN	NaN	NaN	NaN	NaN	NaN	NaN	NaN	NaN	NaN	NaN	NaN	NaN	NaN	NaN	NaN	NaN	NaN	NaN	NaN	NaN
NaN	NaN	NaN	NaN	NaN	1.4689	1.3403	NaN	NaN	1.2234	NaN	NaN	NaN	NaN	NaN	0.95151	1.7711	NaN	NaN	NaN	NaN	NaN	NaN	NaN	NaN	NaN	NaN	NaN	NaN	NaN	NaN	NaN	NaN	NaN	NaN	NaN	NaN	NaN	NaN	NaN	NaN	NaN	NaN	NaN	NaN	NaN	NaN	NaN	NaN	NaN
0.97747	1.3473	0.76969	1.3513	0.87706	1.0905	1.0094	0.86346	0.93736	NaN	0.93547	1.3955	1.0075	1.2437	0.50219	0.52603	NaN	NaN	NaN	3.153	1.4807	NaN	NaN	1.7387	1.7528	1.8664	1.8964	2.0277	0.9316	1.6559	1.6248	1.4792	1.4381	1.4624	0.66322	0.76132	1.0777	1.6471	0.77611	0.90371	0.83409	1.142	NaN	1.0913	1.0203	0.87644	1.0099	1.3601	0.89798	1.0695
0.95037	0.97425	0.80514	0.73961	0.7688	0.83436	0.71397	0.89137	0.75615	0.84645	0.8863	0.85474	0.85738	0.9772	0.87948	0.65879	1.1514	0.55533	1.0371	1.2972	1.229	1.2912	1.4127	1.4137	1.4648	1.3675	1.4684	1.5883	1.5076	1.6929	1.5286	1.7305	1.5312	1.6905	2.051	1.2119	0.93394	0.97327	0.99504	0.83731	0.95568	1.0011	1.0139	1.2488	0.77767	NaN	1.1275	1.1142	1.1892	1.3054
NaN	NaN	NaN	NaN	NaN	NaN	0.72392	NaN	NaN	NaN	NaN	NaN	0.83999	NaN	NaN	NaN	1.1847	NaN	NaN	NaN	NaN	1.2578	NaN	NaN	NaN	NaN	NaN	NaN	NaN	NaN	NaN	2.0077	NaN	NaN	NaN	NaN	NaN	NaN	NaN	NaN	NaN	NaN	NaN	NaN	NaN	NaN	NaN	NaN	NaN	NaN
1.2409	1.186	NaN	1.0967	NaN	1.3762	1.2226	1.8811	0.62125	NaN	1.3793	NaN	1.4276	0.82775	NaN	0.6847	1.4119	1.3483	0.97726	3.2703	1.4635	1.0381	NaN	NaN	NaN	NaN	2.9065	NaN	1.8888	2.4837	2.2374	1.9606	3.0505	1.328	2.0691	NaN	0.83657	1.4422	1.162	1.2865	1.3728	1.4687	NaN	0.80334	1.0217	1.4394	1.9762	1.9581	0.81745	2.0969
NaN	NaN	NaN	NaN	NaN	NaN	NaN	NaN	NaN	NaN	NaN	NaN	NaN	NaN	NaN	NaN	NaN	NaN	NaN	NaN	NaN	NaN	NaN	NaN	NaN	NaN	NaN	NaN	NaN	NaN	NaN	NaN	NaN	NaN	NaN	NaN	NaN	NaN	NaN	NaN	NaN	NaN	NaN	NaN	NaN	NaN	NaN	NaN	NaN	NaN
NaN	NaN	NaN	NaN	NaN	NaN	NaN	NaN	NaN	NaN	NaN	NaN	NaN	NaN	NaN	NaN	NaN	NaN	NaN	NaN	NaN	NaN	NaN	NaN	NaN	NaN	NaN	NaN	NaN	NaN	NaN	NaN	NaN	NaN	NaN	NaN	NaN	NaN	NaN	NaN	NaN	NaN	NaN	NaN	NaN	NaN	NaN	NaN	NaN	NaN
1.0031	NaN	0.83676	NaN	1.0562	NaN	NaN	NaN	NaN	1.0016	NaN	0.88486	0.84288	NaN	0.70627	NaN	NaN	NaN	NaN	1.6986	NaN	NaN	NaN	NaN	NaN	NaN	NaN	1.7515	NaN	NaN	NaN	NaN	NaN	NaN	NaN	NaN	1.0048	NaN	NaN	NaN	1.2274	NaN	NaN	NaN	NaN	NaN	NaN	NaN	NaN	1.25
NaN	NaN	NaN	NaN	NaN	NaN	NaN	NaN	NaN	NaN	NaN	NaN	NaN	NaN	NaN	NaN	NaN	NaN	NaN	NaN	NaN	NaN	NaN	1.6564	2.0391	1.7749	2.0212	NaN	1.5144	NaN	NaN	1.5965	NaN	NaN	0.72442	NaN	NaN	NaN	1.0001	NaN	NaN	NaN	NaN	1.2302	NaN	1.5466	NaN	NaN	1.2524	NaN
NaN	0.92909	0.81754	0.57109	0.5854	0.52702	NaN	NaN	0.43562	NaN	0.45382	0.53388	0.39633	0.71648	0.89136	1.3186	2.9221	1.6061	1.1302	1.2556	1.1064	1.3888	1.3093	NaN	1.0938	1.1673	1.1054	1.1067	1.2221	1.0544	1.0093	1.2364	1.3166	3.6242	3.7345	3.389	1.2498	1.0077	1.0693	0.71633	0.7843	NaN	1.0007	0.93766	0.78717	0.78565	0.75127	0.76508	1.0328	1.6472
0.58585	0.54651	0.82005	0.40509	0.75021	0.6582	NaN	0.4919	0.33053	NaN	NaN	NaN	NaN	NaN	NaN	NaN	NaN	NaN	NaN	NaN	NaN	NaN	NaN	NaN	NaN	NaN	NaN	NaN	NaN	NaN	NaN	NaN	NaN	NaN	NaN	NaN	NaN	NaN	NaN	NaN	NaN	NaN	NaN	NaN	NaN	NaN	NaN	NaN	NaN	NaN
NaN	NaN	NaN	NaN	NaN	0.64999	NaN	NaN	NaN	NaN	NaN	NaN	NaN	NaN	NaN	NaN	NaN	NaN	NaN	NaN	NaN	NaN	NaN	NaN	1.5357	NaN	NaN	NaN	NaN	NaN	NaN	1.8881	NaN	NaN	NaN	NaN	NaN	NaN	NaN	NaN	NaN	NaN	NaN	NaN	NaN	NaN	NaN	NaN	NaN	NaN
0.77447	1.06	0.74536	0.99485	0.68578	NaN	0.69443	1.1788	0.75135	0.72991	0.81428	0.71467	0.89602	0.61043	0.66907	0.57461	0.67131	NaN	NaN	1.4173	1.0239	0.80847	NaN	1.9937	NaN	1.5062	1.4833	1.6557	1.1697	1.867	1.1751	NaN	1.5098	1.7986	0.71742	1.2939	NaN	NaN	NaN	NaN	NaN	NaN	NaN	NaN	NaN	NaN	NaN	NaN	NaN	NaN
NaN	NaN	NaN	NaN	NaN	NaN	NaN	NaN	NaN	NaN	NaN	NaN	NaN	NaN	NaN	NaN	NaN	NaN	NaN	NaN	1.7786	1.6196	1.7981	1.6601	NaN	NaN	NaN	NaN	2.4157	NaN	NaN	NaN	NaN	NaN	0.44729	NaN	NaN	NaN	1.3585	1.0361	NaN	0.61142	NaN	NaN	NaN	NaN	NaN	NaN	NaN	NaN
NaN	NaN	NaN	0.73539	NaN	NaN	NaN	NaN	NaN	NaN	NaN	NaN	NaN	NaN	NaN	NaN	NaN	NaN	NaN	NaN	NaN	1.0011	NaN	NaN	NaN	NaN	NaN	1.1626	NaN	NaN	NaN	NaN	NaN	NaN	NaN	NaN	NaN	NaN	NaN	NaN	NaN	NaN	0.11095	0.58342	NaN	NaN	NaN	NaN	NaN	0.2224
0.91139	0.74434	NaN	0.44089	NaN	NaN	0.48604	0.55186	NaN	0.44364	NaN	NaN	1.3358	NaN	NaN	0.78502	1.2423	NaN	1.2666	NaN	NaN	NaN	NaN	0.93138	NaN	1.1816	1.1926	1.087	NaN	NaN	0.52951	NaN	NaN	NaN	NaN	NaN	NaN	NaN	NaN	NaN	NaN	NaN	NaN	NaN	NaN	NaN	NaN	NaN	NaN	NaN
0.9495	1.2176	0.82678	1.027	0.91535	0.74217	0.92051	NaN	0.98384	0.80971	0.71332	0.83755	1.0419	0.90166	0.68246	0.5493	0.82094	0.39056	1.1226	2.3202	0.94901	0.75938	NaN	2.1308	2.0801	1.6317	2.011	1.609	1.7069	1.7923	1.9291	3.5072	NaN	NaN	0.88466	1.105	NaN	NaN	NaN	NaN	NaN	NaN	NaN	NaN	NaN	NaN	NaN	NaN	NaN	NaN
1.0485	1.0537	0.85098	0.8641	0.77487	0.79871	0.66937	NaN	0.72369	0.54248	0.36637	NaN	NaN	NaN	NaN	NaN	NaN	NaN	NaN	NaN	NaN	NaN	NaN	NaN	NaN	NaN	NaN	NaN	1.45	0.64223	NaN	NaN	0.31592	NaN	NaN	NaN	NaN	NaN	NaN	NaN	NaN	NaN	NaN	NaN	NaN	NaN	NaN	NaN	NaN	NaN
1.2039	NaN	NaN	NaN	NaN	NaN	NaN	0.60358	NaN	NaN	0.36637	NaN	NaN	NaN	NaN	NaN	NaN	NaN	1.1739	2.9844	0.95921	0.77712	NaN	1.9838	1.1978	1.5434	1.6752	1.8879	NaN	NaN	NaN	NaN	NaN	NaN	NaN	NaN	NaN	NaN	NaN	NaN	NaN	NaN	NaN	NaN	NaN	NaN	NaN	NaN	NaN	NaN
NaN	NaN	NaN	NaN	NaN	NaN	NaN	NaN	0.73521	NaN	NaN	NaN	NaN	NaN	NaN	NaN	NaN	NaN	NaN	NaN	NaN	0.92531	NaN	NaN	2.6806	NaN	NaN	1.0917	NaN	NaN	NaN	NaN	NaN	NaN	NaN	NaN	NaN	NaN	NaN	NaN	NaN	NaN	NaN	NaN	NaN	NaN	NaN	NaN	NaN	NaN
0.99577	0.84786	1.0814	0.78082	0.91321	0.93776	0.88098	0.95054	0.76805	0.80612	0.74889	0.66503	0.40676	0.49696	0.37846	0.40113	0.60285	0.40527	1.2183	1.7826	1.8803	1.1716	NaN	2.1775	1.9489	1.4741	1.1522	1.4399	1.638	1.1021	0.81362	1.0865	0.90047	0.93471	0.62651	0.66016	1.117	1.6136	1.1736	0.91916	0.98218	1.2618	1.0677	0.58826	1.2231	0.90058	NaN	0.82876	0.74691	NaN
1.2436	1.0758	0.81814	0.81205	0.68268	1.1117	0.74499	0.88444	0.93594	0.71431	1.0367	0.73466	NaN	0.93788	0.98421	0.85516	NaN	0.4596	1.5515	NaN	0.99164	1.0845	1.1249	1.4948	1.488	1.9571	1.3118	1.7297	1.1681	1.5904	1.8984	NaN	NaN	NaN	1.1498	1.4173	0.99065	NaN	0.76226	1.4462	NaN	NaN	NaN	0.69916	NaN	0.76573	NaN	NaN	NaN	1.1512
NaN	NaN	1.0529	NaN	NaN	0.79847	NaN	NaN	NaN	NaN	NaN	NaN	NaN	NaN	NaN	NaN	NaN	NaN	NaN	NaN	NaN	NaN	NaN	NaN	NaN	0.532	NaN	NaN	1.0234	NaN	NaN	NaN	NaN	NaN	NaN	NaN	NaN	NaN	NaN	NaN	NaN	NaN	NaN	NaN	NaN	NaN	NaN	NaN	NaN	NaN
NaN	NaN	1.0529	NaN	NaN	0.79847	NaN	NaN	NaN	NaN	NaN	NaN	NaN	NaN	NaN	NaN	NaN	NaN	NaN	NaN	NaN	NaN	NaN	NaN	NaN	0.532	NaN	NaN	1.0234	NaN	NaN	NaN	NaN	NaN	NaN	NaN	NaN	NaN	NaN	NaN	NaN	NaN	NaN	NaN	NaN	NaN	NaN	NaN	NaN	NaN
1.1112	0.82287	NaN	0.58568	1.2282	1.3697	NaN	1.5062	NaN	NaN	1.0837	NaN	NaN	NaN	0.65508	0.72385	NaN	NaN	NaN	NaN	NaN	NaN	NaN	NaN	NaN	NaN	NaN	NaN	NaN	NaN	NaN	NaN	NaN	NaN	NaN	NaN	NaN	NaN	NaN	NaN	NaN	NaN	NaN	NaN	NaN	NaN	NaN	NaN	NaN	NaN
NaN	NaN	NaN	NaN	NaN	NaN	NaN	NaN	NaN	NaN	NaN	NaN	NaN	NaN	NaN	NaN	NaN	NaN	1.1149	NaN	NaN	NaN	1.6228	NaN	NaN	NaN	NaN	NaN	NaN	NaN	1.9333	NaN	0.80596	NaN	NaN	NaN	NaN	NaN	NaN	NaN	NaN	NaN	NaN	NaN	NaN	NaN	NaN	NaN	NaN	NaN
1.0168	1.1735	0.66715	1.075	0.61013	0.9043	0.74217	0.84188	1.0325	0.87007	0.64248	0.57012	0.49958	0.56732	0.39033	0.17465	0.29315	0.10604	NaN	NaN	NaN	0.85933	2.1496	2.4376	1.3965	1.5978	1.7296	2.0338	1.5451	1.4692	1.2342	1.378	1.2572	NaN	0.31809	0.33114	1.0729	1.4935	NaN	1.1216	0.94837	1.2826	0.85021	1.2465	1.1092	0.98696	1.4303	1.2514	1.0281	0.88797
1.0758	0.99751	NaN	0.68832	NaN	0.88163	0.76751	NaN	0.69773	0.55089	0.59998	0.40277	NaN	0.1742	0.11046	0.093855	NaN	0.084113	1.2408	1.4961	1.4683	NaN	NaN	1.2378	1.4255	1.4554	1.344	1.5815	1.3521	1.1711	NaN	0.46915	0.25664	0.16535	NaN	0.12057	NaN	1.1869	NaN	NaN	NaN	0.94022	0.9198	0.81084	0.85521	0.67907	0.70701	0.58963	NaN	NaN
NaN	NaN	NaN	NaN	NaN	NaN	NaN	NaN	NaN	NaN	NaN	NaN	NaN	NaN	NaN	NaN	NaN	NaN	NaN	NaN	NaN	NaN	NaN	NaN	NaN	NaN	NaN	NaN	NaN	NaN	NaN	0.41011	NaN	NaN	NaN	NaN	NaN	NaN	1.042	1.001	0.99915	NaN	NaN	NaN	0.66835	NaN	NaN	NaN	NaN	NaN
NaN	NaN	NaN	NaN	NaN	NaN	NaN	NaN	NaN	NaN	NaN	NaN	NaN	NaN	NaN	NaN	NaN	NaN	NaN	NaN	NaN	NaN	NaN	NaN	NaN	NaN	NaN	NaN	NaN	NaN	NaN	NaN	NaN	NaN	NaN	NaN	NaN	NaN	NaN	NaN	NaN	NaN	NaN	NaN	NaN	NaN	NaN	NaN	NaN	NaN
1.0199	1.283	1.1638	0.93698	0.64686	1.0548	0.70726	1.0576	0.88508	0.8484	0.53741	1.0415	0.98075	1.0987	0.77657	0.76458	1.2985	0.59675	1.2689	2.0145	1.7118	1.8037	2.32	2.0082	1.7376	0.80381	1.8734	2.0533	1.5166	1.9956	2.0598	2.2088	2.0019	2.1532	1.8276	1.7024	1.0044	1.5174	0.85388	0.97184	1.143	1.1984	0.93901	1.0234	1.0325	1.0832	1.3588	1.4482	1.487	1.6236
0.83683	NaN	0.69012	0.91026	NaN	NaN	0.68932	0.37263	NaN	0.62214	0.56663	NaN	NaN	NaN	NaN	NaN	NaN	NaN	NaN	NaN	NaN	NaN	NaN	NaN	NaN	1.5222	NaN	1.6685	1.0976	NaN	NaN	NaN	NaN	0.30298	NaN	NaN	NaN	NaN	NaN	NaN	NaN	NaN	NaN	0.79898	NaN	NaN	NaN	NaN	NaN	NaN
NaN	NaN	NaN	NaN	NaN	NaN	NaN	NaN	NaN	NaN	NaN	NaN	NaN	NaN	NaN	NaN	NaN	NaN	NaN	NaN	NaN	NaN	NaN	NaN	NaN	NaN	NaN	NaN	NaN	NaN	NaN	NaN	NaN	NaN	NaN	NaN	NaN	NaN	NaN	NaN	NaN	NaN	NaN	NaN	NaN	NaN	NaN	NaN	NaN	NaN
NaN	NaN	NaN	NaN	NaN	NaN	NaN	NaN	NaN	NaN	NaN	NaN	NaN	NaN	NaN	NaN	NaN	NaN	NaN	NaN	NaN	NaN	NaN	NaN	NaN	NaN	NaN	NaN	NaN	NaN	NaN	NaN	NaN	NaN	NaN	NaN	NaN	NaN	NaN	NaN	NaN	NaN	NaN	NaN	NaN	NaN	NaN	NaN	NaN	NaN
NaN	NaN	NaN	NaN	NaN	NaN	NaN	NaN	NaN	NaN	NaN	NaN	NaN	NaN	NaN	NaN	NaN	NaN	NaN	NaN	NaN	NaN	NaN	NaN	NaN	NaN	NaN	NaN	NaN	NaN	NaN	NaN	NaN	NaN	NaN	NaN	NaN	NaN	NaN	NaN	NaN	NaN	NaN	NaN	NaN	NaN	NaN	NaN	NaN	NaN
NaN	NaN	NaN	NaN	NaN	NaN	NaN	NaN	NaN	NaN	NaN	NaN	NaN	NaN	NaN	NaN	NaN	NaN	NaN	NaN	NaN	NaN	NaN	NaN	NaN	NaN	NaN	NaN	NaN	NaN	NaN	NaN	NaN	NaN	NaN	NaN	NaN	NaN	NaN	NaN	NaN	NaN	NaN	NaN	NaN	NaN	NaN	NaN	NaN	NaN
1.0313	1.217	0.75507	NaN	0.95047	NaN	1.1118	NaN	NaN	NaN	NaN	0.83203	NaN	0.3568	0.20215	NaN	NaN	NaN	NaN	2.018	NaN	NaN	NaN	1.4463	NaN	NaN	1.8511	NaN	NaN	2.0154	NaN	NaN	NaN	NaN	NaN	NaN	NaN	NaN	NaN	NaN	NaN	NaN	NaN	NaN	NaN	NaN	NaN	1.3648	0.85201	NaN
0.91148	1.1776	1.2167	0.50956	1.0302	0.79303	0.90171	0.59077	0.8488	0.8163	0.72898	0.77568	0.49466	0.64478	0.41327	0.21674	0.42418	0.10807	1.2863	2.1821	1.0367	0.7263	2.1347	2.1615	1.0517	1.0822	1.9198	2.0385	1.6008	1.0697	1.7533	1.3712	1.1666	0.33637	0.58801	0.45862	1.029	1.282	0.72797	1.184	1.1172	1.1992	0.98553	0.87307	0.91038	0.99338	0.90969	1.1808	1.0365	0.87291
1.1334	1.154	0.7591	1.3901	0.41456	0.79316	0.65701	0.66176	1.278	0.79905	0.40863	0.30307	NaN	0.41534	0.25506	NaN	NaN	NaN	1.5763	5.0028	1.3237	0.93941	1.8034	2.9766	1.2167	1.2371	1.5433	1.6393	1.4641	1.3245	0.6869	1.4836	0.96882	0.596	0.22648	NaN	1.1768	1.3595	1.5644	1.0715	0.82942	1.485	0.89483	1.8778	0.90266	0.71646	1.4433	1.2423	0.55895	0.51541
NaN	1.3414	NaN	NaN	0.9259	NaN	NaN	1.0941	NaN	NaN	NaN	NaN	1.3574	1.341	NaN	NaN	NaN	0.58313	1.4071	NaN	NaN	NaN	NaN	NaN	2.213	2.3323	2.085	NaN	1.7114	NaN	2.2999	NaN	NaN	2.6694	NaN	NaN	NaN	NaN	0.91674	NaN	1.6444	1.7179	1.0351	NaN	NaN	1.4299	NaN	1.6557	NaN	NaN
1.1008	1.2743	0.68261	1.0776	0.89886	0.93214	0.80077	NaN	1.049	1.3542	1.008	1.0858	NaN	NaN	1.0488	0.8684	1.2902	0.57548	NaN	2.7361	0.93062	0.91248	2.3761	2.3947	2.1346	2.1695	2.9226	1.8604	1.7008	2.5811	2.2812	3.4421	2.4829	NaN	1.3766	1.8566	1.0731	NaN	1.0755	0.95057	1.2363	NaN	1.648	1.3583	1.3691	1.4299	1.648	1.9389	2.2127	2.5142
NaN	NaN	NaN	NaN	NaN	NaN	NaN	NaN	NaN	NaN	NaN	NaN	NaN	NaN	NaN	NaN	NaN	NaN	NaN	NaN	NaN	NaN	NaN	NaN	NaN	NaN	NaN	NaN	NaN	1.253	1.826	NaN	NaN	NaN	NaN	NaN	NaN	NaN	NaN	NaN	NaN	NaN	NaN	NaN	NaN	NaN	NaN	NaN	NaN	NaN
NaN	NaN	NaN	NaN	0.72369	NaN	NaN	NaN	NaN	NaN	NaN	NaN	0.97981	NaN	NaN	NaN	NaN	NaN	NaN	1.0797	NaN	NaN	NaN	NaN	1.6702	NaN	1.6062	NaN	0.84805	NaN	NaN	NaN	1.0526	NaN	NaN	NaN	0.60282	NaN	NaN	NaN	NaN	NaN	NaN	NaN	NaN	NaN	NaN	NaN	NaN	0.89536
NaN	NaN	NaN	NaN	NaN	NaN	NaN	NaN	NaN	NaN	NaN	NaN	NaN	NaN	NaN	NaN	NaN	NaN	NaN	NaN	NaN	NaN	NaN	NaN	NaN	NaN	NaN	NaN	NaN	NaN	NaN	NaN	NaN	NaN	NaN	NaN	NaN	NaN	NaN	NaN	NaN	NaN	NaN	NaN	NaN	NaN	NaN	NaN	NaN	NaN
NaN	NaN	NaN	NaN	NaN	NaN	NaN	NaN	NaN	NaN	NaN	NaN	NaN	NaN	NaN	NaN	NaN	NaN	NaN	NaN	NaN	NaN	NaN	NaN	NaN	NaN	NaN	NaN	NaN	NaN	NaN	NaN	NaN	NaN	NaN	NaN	NaN	NaN	NaN	NaN	NaN	NaN	NaN	NaN	NaN	NaN	NaN	NaN	NaN	NaN
NaN	NaN	NaN	NaN	NaN	NaN	NaN	NaN	NaN	NaN	NaN	NaN	NaN	NaN	NaN	NaN	NaN	NaN	NaN	NaN	NaN	NaN	NaN	NaN	NaN	NaN	NaN	NaN	NaN	NaN	NaN	NaN	NaN	NaN	NaN	NaN	NaN	NaN	NaN	NaN	NaN	NaN	NaN	NaN	NaN	NaN	NaN	NaN	NaN	NaN
1.0015	1.0292	0.55798	0.60125	0.55721	0.43357	0.20968	0.13146	0.060389	0.029594	NaN	NaN	NaN	NaN	NaN	NaN	0.012943	NaN	1.2713	1.6901	0.98625	0.68126	1.4686	1.1431	0.97508	0.94427	0.65098	0.39264	0.25169	0.034257	NaN	NaN	NaN	NaN	NaN	NaN	0.96258	1.1893	0.62148	0.68008	0.63919	0.55392	0.30896	0.1975	0.10376	0.064265	0.050935	0.016312	0.011945	NaN
0.9179	0.88457	0.85407	0.74647	0.83358	0.80833	0.75192	1.0901	0.59212	0.5243	0.74913	0.96707	0.75113	0.8273	0.78069	0.61582	0.95994	0.50285	1.1676	NaN	1.221	1.0535	1.6031	1.4889	1.5645	1.2574	1.2251	1.4692	1.8418	1.4775	1.5548	1.4438	1.3321	1.4449	1.1785	1.0463	0.87229	1.0803	0.70296	1.0606	0.84644	0.97502	0.86864	0.65267	0.74374	0.57535	1.2739	1.2023	NaN	1.0761
NaN	NaN	NaN	NaN	NaN	NaN	NaN	NaN	NaN	NaN	NaN	NaN	NaN	NaN	NaN	NaN	NaN	NaN	NaN	NaN	NaN	NaN	NaN	NaN	NaN	NaN	NaN	NaN	NaN	NaN	NaN	NaN	NaN	NaN	NaN	NaN	NaN	NaN	NaN	NaN	NaN	NaN	NaN	NaN	NaN	NaN	NaN	NaN	NaN	NaN
NaN	NaN	NaN	NaN	NaN	NaN	NaN	NaN	NaN	NaN	NaN	NaN	NaN	NaN	NaN	NaN	NaN	NaN	NaN	NaN	NaN	NaN	NaN	NaN	NaN	NaN	NaN	NaN	NaN	NaN	NaN	NaN	NaN	NaN	NaN	NaN	NaN	NaN	NaN	NaN	NaN	NaN	NaN	NaN	NaN	NaN	NaN	NaN	NaN	NaN
NaN	NaN	NaN	NaN	NaN	NaN	NaN	NaN	NaN	NaN	NaN	NaN	NaN	NaN	NaN	NaN	NaN	NaN	NaN	NaN	NaN	NaN	NaN	NaN	NaN	NaN	NaN	NaN	NaN	NaN	NaN	NaN	NaN	NaN	NaN	NaN	NaN	NaN	NaN	NaN	NaN	NaN	NaN	NaN	NaN	NaN	NaN	NaN	NaN	NaN
NaN	1.0027	NaN	NaN	0.91479	0.89414	NaN	NaN	1.1095	NaN	0.79649	0.99343	0.8449	1.1734	0.91787	0.59708	1.0046	NaN	NaN	2.8573	1.011	0.78253	1.8408	2.4965	2.0212	2.0877	2.815	1.697	1.1876	NaN	NaN	NaN	NaN	1.865	NaN	NaN	NaN	NaN	NaN	NaN	NaN	1.8631	NaN	NaN	1.2746	1.0713	0.89921	1.3885	1.6927	1.8831
NaN	NaN	NaN	NaN	NaN	NaN	NaN	NaN	NaN	NaN	NaN	NaN	NaN	NaN	NaN	NaN	NaN	NaN	NaN	NaN	NaN	NaN	NaN	NaN	NaN	NaN	NaN	NaN	NaN	NaN	NaN	NaN	NaN	NaN	NaN	NaN	NaN	NaN	NaN	NaN	NaN	NaN	NaN	NaN	NaN	NaN	NaN	NaN	NaN	NaN
0.8073	1.1538	NaN	NaN	0.72805	0.6728	NaN	0.52313	NaN	NaN	NaN	NaN	NaN	NaN	NaN	NaN	NaN	NaN	1.4901	1.5824	1.2754	NaN	NaN	1.0164	0.77596	NaN	0.91392	NaN	NaN	NaN	NaN	NaN	NaN	NaN	NaN	NaN	NaN	NaN	NaN	NaN	NaN	NaN	NaN	NaN	NaN	NaN	NaN	NaN	NaN	NaN
NaN	NaN	NaN	NaN	NaN	NaN	NaN	NaN	NaN	NaN	NaN	NaN	NaN	NaN	NaN	NaN	NaN	NaN	NaN	NaN	NaN	NaN	NaN	NaN	NaN	NaN	NaN	NaN	NaN	NaN	NaN	NaN	NaN	NaN	NaN	NaN	NaN	NaN	NaN	NaN	NaN	NaN	NaN	NaN	NaN	NaN	NaN	NaN	NaN	NaN
1.3773	NaN	NaN	NaN	NaN	NaN	NaN	1.167	NaN	NaN	NaN	NaN	NaN	NaN	NaN	NaN	0.88225	NaN	NaN	NaN	NaN	NaN	NaN	NaN	NaN	NaN	NaN	NaN	NaN	NaN	NaN	NaN	NaN	NaN	NaN	NaN	NaN	NaN	NaN	NaN	NaN	NaN	NaN	1.1075	NaN	1.028	NaN	NaN	NaN	1.3177
1.3773	NaN	NaN	NaN	NaN	NaN	NaN	1.167	NaN	NaN	NaN	NaN	NaN	NaN	NaN	NaN	0.88225	NaN	NaN	NaN	NaN	NaN	NaN	NaN	NaN	NaN	NaN	NaN	NaN	NaN	NaN	NaN	NaN	NaN	NaN	NaN	NaN	NaN	NaN	NaN	NaN	NaN	NaN	1.1075	NaN	1.028	NaN	NaN	NaN	1.3177
NaN	2.1846	1.019	NaN	1.4239	2.573	NaN	NaN	NaN	NaN	NaN	2.4291	NaN	2.4185	NaN	NaN	1.5374	NaN	NaN	NaN	NaN	NaN	NaN	NaN	NaN	2.1593	NaN	3.6547	NaN	NaN	NaN	2.2208	NaN	3.0643	3.0514	NaN	1.3433	0.95233	NaN	NaN	NaN	NaN	1.384	NaN	1.9892	NaN	NaN	1.9311	NaN	1.7464
NaN	NaN	NaN	NaN	NaN	NaN	NaN	NaN	NaN	NaN	NaN	NaN	NaN	NaN	NaN	NaN	NaN	NaN	NaN	NaN	NaN	NaN	NaN	NaN	NaN	NaN	NaN	NaN	NaN	NaN	NaN	NaN	NaN	NaN	NaN	NaN	NaN	NaN	NaN	NaN	NaN	NaN	NaN	NaN	NaN	NaN	NaN	NaN	NaN	NaN
NaN	NaN	0.75238	NaN	0.94087	0.85951	0.79731	NaN	0.67325	0.72515	NaN	0.59801	0.37303	0.32483	0.19825	NaN	NaN	NaN	NaN	NaN	NaN	NaN	NaN	NaN	NaN	NaN	NaN	NaN	NaN	NaN	NaN	NaN	NaN	NaN	NaN	NaN	NaN	NaN	NaN	NaN	NaN	NaN	NaN	NaN	NaN	NaN	NaN	NaN	NaN	NaN
0.9059	0.86234	1.021	0.64017	0.78214	0.74701	0.6795	0.71281	0.55724	0.50071	0.53458	0.37721	0.25717	0.14079	0.13384	0.073612	0.16163	0.094858	1.0174	1.3322	1.2373	1.4311	1.565	1.3852	1.602	1.4165	1.3418	1.0537	1.2602	1.191	0.59261	NaN	NaN	NaN	0.19081	NaN	1.0321	1.172	1.0431	0.86064	NaN	0.88092	0.98902	1.1329	0.75247	0.6828	0.54707	0.50502	0.30846	0.31842
NaN	NaN	NaN	NaN	NaN	NaN	NaN	NaN	0.55724	0.50071	0.53458	NaN	NaN	NaN	NaN	NaN	NaN	NaN	NaN	NaN	NaN	NaN	NaN	NaN	NaN	NaN	NaN	NaN	NaN	NaN	NaN	NaN	NaN	NaN	NaN	NaN	NaN	NaN	NaN	NaN	NaN	NaN	NaN	NaN	NaN	0.6828	0.54707	0.50502	0.30846	0.31842
0.90777	1.0512	NaN	NaN	0.98517	0.79652	0.81583	0.82595	0.53512	0.59223	0.75687	0.85051	0.79125	0.72913	0.79365	0.5912	1.1198	0.56712	1.2202	1.1056	1.5178	1.299	1.3681	1.0897	1.6142	1.305	1.5609	1.4738	1.6225	1.607	NaN	1.4192	1.3222	1.3866	1.7102	1.0984	0.99515	0.98529	0.96699	0.91389	1.0515	0.91576	1.067	0.72341	0.89041	0.92705	0.81947	0.97208	0.9941	NaN
NaN	NaN	NaN	NaN	NaN	NaN	NaN	NaN	NaN	NaN	NaN	NaN	NaN	NaN	NaN	NaN	NaN	NaN	NaN	NaN	NaN	NaN	NaN	NaN	NaN	NaN	NaN	NaN	NaN	NaN	NaN	NaN	NaN	NaN	NaN	NaN	NaN	NaN	NaN	NaN	NaN	NaN	NaN	NaN	NaN	NaN	NaN	NaN	NaN	NaN
NaN	NaN	NaN	NaN	NaN	NaN	NaN	NaN	NaN	NaN	NaN	NaN	NaN	NaN	NaN	NaN	NaN	NaN	NaN	6.0598	NaN	NaN	NaN	3.9772	1.7929	1.5146	1.7246	2.9427	NaN	NaN	NaN	NaN	NaN	NaN	2.8172	2.2931	NaN	1.9137	NaN	NaN	NaN	NaN	NaN	NaN	1.9334	2.2714	NaN	1.6536	3.145	NaN
NaN	NaN	NaN	NaN	NaN	NaN	NaN	NaN	NaN	NaN	NaN	NaN	NaN	NaN	NaN	NaN	NaN	NaN	NaN	NaN	NaN	NaN	NaN	NaN	NaN	NaN	NaN	NaN	NaN	NaN	NaN	NaN	NaN	NaN	NaN	NaN	NaN	NaN	NaN	NaN	NaN	NaN	NaN	NaN	NaN	NaN	NaN	NaN	NaN	NaN
NaN	NaN	NaN	NaN	NaN	NaN	NaN	NaN	NaN	NaN	NaN	NaN	NaN	NaN	NaN	NaN	NaN	NaN	NaN	NaN	NaN	NaN	NaN	NaN	NaN	NaN	NaN	NaN	NaN	NaN	NaN	NaN	NaN	NaN	NaN	NaN	NaN	NaN	NaN	NaN	NaN	NaN	NaN	NaN	NaN	NaN	NaN	NaN	NaN	NaN
NaN	NaN	NaN	NaN	NaN	NaN	NaN	NaN	NaN	NaN	NaN	NaN	NaN	1.04	1.0237	NaN	NaN	NaN	NaN	NaN	NaN	NaN	NaN	NaN	NaN	NaN	NaN	NaN	NaN	NaN	NaN	NaN	NaN	NaN	NaN	NaN	NaN	0.95575	NaN	0.89294	NaN	NaN	NaN	NaN	NaN	0.90416	NaN	NaN	NaN	1.8562
NaN	1.3967	0.72382	0.82195	0.7843	0.8917	0.76596	0.99279	NaN	0.76666	0.86745	1.042	1.2233	NaN	0.28346	1.2289	NaN	NaN	1.2121	NaN	2.2561	0.7404	NaN	NaN	0.54241	NaN	NaN	NaN	2.3501	1.6441	2.2282	2.9749	2.5784	2.496	2.2925	NaN	1.0943	2.0588	0.8122	0.90043	0.97056	NaN	1.2266	0.30367	0.84842	1.1493	1.2558	1.4771	1.4577	1.431
NaN	1.5314	0.94569	1.0588	1.0345	NaN	NaN	0.97339	NaN	NaN	NaN	NaN	NaN	NaN	NaN	NaN	NaN	NaN	0.99946	2.4946	1.1151	1.2476	NaN	2.3011	1.8006	2.2269	1.8974	1.8212	NaN	2.7656	1.42	NaN	0.97446	0.61121	NaN	0.36909	1.0531	1.4855	0.95735	1.2383	1.3408	NaN	1.1995	NaN	NaN	NaN	NaN	NaN	NaN	NaN
NaN	NaN	0.72461	NaN	NaN	0.80145	0.54876	0.65073	NaN	0.54781	1.0692	1.4696	1.0852	0.50114	1.0904	0.68731	1.2609	1.8661	1.0422	NaN	0.92732	NaN	NaN	NaN	0.8709	1.1873	NaN	NaN	NaN	0.98188	1.4937	0.6772	0.58072	0.92522	1.0558	0.69093	0.68834	NaN	0.38327	NaN	1.2181	0.28586	NaN	NaN	0.6505	0.65029	0.96419	1.1232	0.73216	0.64087
NaN	NaN	0.72461	NaN	NaN	0.80145	0.54876	0.65073	NaN	0.54781	1.0692	1.4696	1.0852	0.50114	1.0904	0.68731	1.2609	1.8661	1.0422	NaN	0.92732	NaN	NaN	NaN	0.8709	1.1873	NaN	NaN	NaN	0.98188	1.4937	0.6772	0.58072	0.92522	1.0558	0.69093	0.68834	NaN	0.38327	NaN	1.2181	0.28586	NaN	NaN	0.6505	0.65029	0.96419	1.1232	0.73216	0.64087
1.0113	1.0108	0.81656	0.70602	0.86917	0.83465	0.77525	0.73222	0.64104	0.67123	0.70645	0.80213	0.78143	0.78036	0.73794	0.66895	0.85255	0.40991	1.1723	1.4827	1.3011	1.3235	1.59	1.1662	1.2644	1.2131	1.3458	1.3291	1.5708	1.4878	1.393	1.4967	1.2992	1.4656	1.4681	1.3374	0.92548	1.1096	1.1029	0.91418	0.91034	0.92123	1.0098	0.86281	0.8845	0.86071	1.0435	1.0996	1.1636	1.1571
0.99525	1.323	0.70902	1.0864	0.83872	0.78941	0.90409	1.0316	0.96918	0.84488	0.82379	0.93444	0.76164	0.97527	0.73193	0.61639	0.80647	0.48311	1.2845	2.0387	0.90929	0.78199	2.5849	1.7822	1.7775	1.814	1.6697	1.8697	1.3427	1.7534	1.6002	1.8681	1.4838	1.4955	0.79485	1.1758	0.99985	1.7109	0.82681	0.97568	1.0647	1.3481	0.8308	0.94356	1.223	1.0935	1.3966	1.4363	1.1866	1.2639
NaN	NaN	NaN	NaN	NaN	NaN	NaN	NaN	NaN	NaN	NaN	NaN	NaN	NaN	NaN	NaN	NaN	NaN	NaN	NaN	NaN	NaN	NaN	NaN	NaN	NaN	NaN	NaN	NaN	NaN	NaN	NaN	NaN	NaN	NaN	NaN	NaN	NaN	NaN	NaN	NaN	NaN	NaN	NaN	NaN	NaN	NaN	NaN	NaN	NaN
0.72126	0.78394	NaN	0.69174	NaN	NaN	0.5154	0.84263	0.65555	0.39905	0.5367	NaN	0.5183	0.56402	0.49515	0.44166	0.29238	NaN	1.0671	2.2075	NaN	0.88659	2.3482	1.6604	1.6582	0.97629	1.5205	1.5459	1.0399	NaN	2.1215	1.1334	1.915	1.0658	1.0135	0.32271	0.95843	1.649	0.78762	0.97576	0.43997	1.2185	1.078	0.94929	0.89381	0.82034	0.88224	0.92225	1.0096	0.87319
NaN	NaN	NaN	NaN	NaN	NaN	NaN	NaN	NaN	NaN	NaN	NaN	NaN	NaN	NaN	NaN	NaN	NaN	NaN	NaN	NaN	NaN	NaN	NaN	NaN	NaN	NaN	NaN	NaN	NaN	NaN	NaN	NaN	NaN	NaN	NaN	NaN	NaN	NaN	NaN	NaN	NaN	NaN	NaN	NaN	NaN	NaN	NaN	NaN	NaN
0.9233	1.2743	1.0637	0.68225	NaN	1.048	0.75524	0.93853	0.62504	0.83944	1.0891	NaN	NaN	0.78724	0.98855	0.77056	1.495	0.74021	NaN	NaN	1.2142	0.97642	NaN	NaN	1.4895	1.6963	1.358	NaN	NaN	1.6573	1.9168	1.4528	NaN	1.2499	1.2183	1.4127	0.93222	NaN	NaN	0.851	NaN	0.80483	0.78359	0.8885	0.6953	NaN	1.1584	1.0688	0.94709	1.2492
NaN	NaN	NaN	NaN	1.22	NaN	0.99161	NaN	NaN	NaN	NaN	NaN	NaN	NaN	NaN	NaN	1.5203	NaN	1.3994	1.2224	NaN	NaN	NaN	1.1901	NaN	NaN	NaN	1.4103	1.386	NaN	NaN	NaN	1.277	1.6801	NaN	NaN	1.1038	0.91519	NaN	NaN	1.1404	NaN	NaN	NaN	NaN	0.66176	NaN	NaN	NaN	NaN
0.94494	1.1251	NaN	NaN	0.85164	NaN	NaN	0.48613	NaN	NaN	NaN	NaN	NaN	NaN	NaN	NaN	NaN	NaN	NaN	NaN	NaN	NaN	NaN	1.6729	1.1976	NaN	NaN	1.7127	NaN	NaN	1.3016	NaN	NaN	NaN	NaN	NaN	0.98968	1.4446	NaN	NaN	NaN	0.98634	0.64908	0.86887	NaN	NaN	NaN	NaN	NaN	NaN
0.94494	1.1251	NaN	NaN	0.85164	NaN	NaN	0.48613	NaN	NaN	NaN	NaN	NaN	NaN	NaN	NaN	NaN	NaN	NaN	NaN	NaN	NaN	NaN	NaN	NaN	NaN	NaN	NaN	NaN	NaN	NaN	NaN	NaN	NaN	NaN	NaN	NaN	NaN	NaN	NaN	NaN	NaN	NaN	NaN	NaN	NaN	NaN	NaN	NaN	NaN
NaN	NaN	1.1969	NaN	0.95817	NaN	0.98053	NaN	NaN	NaN	NaN	NaN	NaN	NaN	NaN	NaN	NaN	NaN	NaN	NaN	NaN	NaN	NaN	NaN	NaN	NaN	NaN	NaN	NaN	NaN	NaN	NaN	NaN	NaN	NaN	NaN	NaN	NaN	NaN	NaN	NaN	NaN	NaN	NaN	NaN	NaN	NaN	NaN	NaN	NaN
NaN	NaN	NaN	NaN	NaN	NaN	NaN	NaN	NaN	NaN	NaN	NaN	NaN	1.13	NaN	NaN	NaN	1.0836	NaN	NaN	NaN	NaN	NaN	NaN	NaN	NaN	NaN	NaN	NaN	NaN	NaN	NaN	NaN	NaN	NaN	NaN	NaN	NaN	NaN	NaN	NaN	NaN	NaN	NaN	NaN	NaN	NaN	NaN	NaN	NaN
0.54318	NaN	0.32729	0.33574	NaN	NaN	0.6355	NaN	0.36708	NaN	NaN	1.0699	0.5885	NaN	NaN	0.19398	NaN	NaN	NaN	0.65234	NaN	0.75428	NaN	0.57214	NaN	NaN	NaN	NaN	0.99157	0.68456	NaN	0.31952	NaN	0.41079	0.22182	NaN	0.47562	NaN	0.64414	0.52533	NaN	0.63924	0.59348	NaN	NaN	0.40983	1.0643	NaN	0.43927	NaN
NaN	0.83451	0.74044	NaN	0.49446	NaN	0.33776	NaN	NaN	0.18932	NaN	NaN	NaN	NaN	NaN	NaN	NaN	NaN	NaN	1.0428	1.0958	NaN	0.8778	0.652	0.76083	0.66583	NaN	NaN	NaN	NaN	NaN	NaN	NaN	NaN	NaN	NaN	0.81456	0.72443	NaN	NaN	NaN	0.34801	0.42635	NaN	NaN	NaN	NaN	NaN	NaN	NaN
NaN	NaN	NaN	NaN	NaN	NaN	NaN	NaN	NaN	NaN	NaN	NaN	NaN	NaN	NaN	NaN	NaN	NaN	NaN	NaN	NaN	NaN	NaN	NaN	NaN	NaN	NaN	NaN	NaN	NaN	NaN	NaN	NaN	NaN	NaN	NaN	NaN	NaN	NaN	NaN	NaN	NaN	NaN	NaN	NaN	NaN	NaN	NaN	NaN	NaN
NaN	1.0746	NaN	NaN	NaN	NaN	NaN	NaN	NaN	NaN	0.93986	NaN	NaN	NaN	0.61657	NaN	NaN	0.19426	NaN	NaN	0.86825	0.6732	NaN	2.225	1.6291	1.5518	1.7678	NaN	1.4185	1.3817	NaN	2.1508	1.6513	1.1442	NaN	0.89924	NaN	NaN	NaN	NaN	NaN	NaN	NaN	NaN	NaN	NaN	NaN	NaN	NaN	NaN
NaN	1.0746	NaN	NaN	NaN	NaN	NaN	NaN	NaN	NaN	0.93986	NaN	NaN	NaN	NaN	0.43406	NaN	0.19426	NaN	NaN	0.86825	0.6732	NaN	2.225	1.6291	1.5169	1.7678	NaN	1.4185	1.3817	NaN	2.1508	1.6513	1.1442	NaN	0.89924	NaN	NaN	NaN	NaN	NaN	NaN	NaN	NaN	NaN	NaN	NaN	NaN	NaN	1.0065
0.96267	0.98156	0.68099	0.69393	0.78281	0.89364	0.59018	0.69138	0.73473	0.44711	0.79321	0.7771	0.56596	0.69528	0.616	0.40665	0.9245	0.49719	1.2778	1.6532	1.1398	0.73626	0.98633	0.9279	0.98156	1.1265	0.99495	0.96005	1.675	1.4964	1.2656	0.88051	1.4563	0.93286	1.1478	0.79909	0.99936	0.80783	0.62921	0.62943	0.9084	0.67569	0.89937	1.1687	0.57792	0.76896	0.74896	1.0358	1.0904	0.75251
0.83481	0.61083	0.47342	0.55947	0.80655	0.52481	0.31384	0.42772	0.35438	NaN	0.45949	NaN	NaN	NaN	NaN	NaN	NaN	NaN	1.3422	1.0126	0.77881	0.8726	NaN	0.78272	NaN	0.64391	0.47868	0.45268	0.58582	NaN	NaN	NaN	NaN	NaN	NaN	NaN	0.9753	NaN	NaN	0.39664	0.58332	0.32396	NaN	NaN	NaN	NaN	NaN	NaN	NaN	NaN
0.83816	0.9172	0.62721	0.43379	0.94572	0.69446	0.80515	0.73407	0.44195	0.30532	0.37756	NaN	NaN	NaN	NaN	NaN	NaN	NaN	1.276	0.71734	1.0922	0.83439	NaN	0.99619	1.0875	0.97895	1.3049	0.88205	0.81582	0.49525	0.45347	NaN	NaN	NaN	NaN	NaN	0.95442	NaN	0.58782	0.63767	1.1457	0.58793	0.44008	0.76142	0.87314	0.36448	0.33522	NaN	NaN	NaN
1.2174	0.90955	0.62721	0.68857	1.1326	1.0024	1.4491	1.3864	0.96553	1.3854	1.3861	NaN	0.97046	0.4326	0.30525	NaN	NaN	NaN	1.276	0.71734	1.1243	1.0017	1.1367	0.99619	1.7516	1.2281	1.365	2.1617	2.2325	0.49525	2.3238	1.5463	2.2563	NaN	NaN	NaN	1.0877	NaN	0.87669	1.0276	1.2308	0.58793	1.0309	0.97571	1.0476	1.7149	2.6486	1.5551	0.91557	0.5761
1.0867	1.1326	0.64112	NaN	NaN	NaN	NaN	NaN	NaN	0.55185	NaN	NaN	NaN	NaN	NaN	NaN	NaN	NaN	NaN	NaN	NaN	NaN	NaN	NaN	NaN	NaN	NaN	NaN	NaN	NaN	NaN	NaN	NaN	NaN	NaN	NaN	NaN	NaN	NaN	NaN	NaN	NaN	NaN	NaN	NaN	NaN	NaN	NaN	NaN	NaN
NaN	NaN	NaN	NaN	NaN	NaN	NaN	NaN	NaN	NaN	NaN	NaN	NaN	NaN	NaN	NaN	NaN	NaN	NaN	NaN	NaN	NaN	NaN	NaN	NaN	NaN	NaN	NaN	NaN	NaN	NaN	NaN	NaN	NaN	NaN	NaN	NaN	NaN	NaN	NaN	NaN	NaN	NaN	NaN	NaN	NaN	NaN	NaN	NaN	NaN
NaN	NaN	NaN	NaN	NaN	NaN	NaN	NaN	NaN	NaN	NaN	NaN	NaN	NaN	NaN	NaN	NaN	NaN	NaN	NaN	NaN	NaN	NaN	NaN	NaN	NaN	NaN	NaN	NaN	NaN	NaN	NaN	NaN	NaN	NaN	NaN	NaN	NaN	NaN	NaN	NaN	NaN	NaN	NaN	NaN	NaN	NaN	NaN	NaN	NaN
NaN	NaN	NaN	NaN	NaN	NaN	NaN	NaN	NaN	NaN	NaN	NaN	NaN	NaN	NaN	NaN	NaN	NaN	NaN	NaN	NaN	NaN	NaN	NaN	NaN	NaN	NaN	NaN	NaN	NaN	NaN	NaN	NaN	NaN	NaN	NaN	0.88065	1.1384	NaN	1.237	NaN	NaN	NaN	NaN	NaN	NaN	NaN	NaN	1.2649	NaN
0.86739	0.89871	0.85957	0.70791	0.74562	0.72658	0.72164	0.73989	0.68436	0.58899	0.69901	0.82371	0.75617	0.77	0.68503	0.57151	NaN	NaN	1.1381	NaN	1.2979	1.1571	1.3	1.2559	1.1589	1.2706	1.1235	1.4171	1.3182	NaN	1.4953	1.3564	1.3224	NaN	NaN	NaN	1.0289	NaN	0.8974	0.80235	0.84838	0.80478	0.85252	0.76701	0.65431	0.61946	1.1412	1.1007	0.94609	1.0654
1.5967	1.6199	1.2892	NaN	NaN	1.5002	NaN	1.2999	NaN	NaN	NaN	NaN	NaN	NaN	NaN	NaN	NaN	NaN	NaN	1.4393	NaN	NaN	NaN	1.9311	NaN	NaN	NaN	1.8491	NaN	1.4981	NaN	0.87132	1.013	NaN	NaN	NaN	NaN	NaN	NaN	NaN	NaN	NaN	NaN	NaN	NaN	NaN	NaN	NaN	NaN	NaN
NaN	NaN	NaN	NaN	NaN	NaN	NaN	NaN	NaN	NaN	NaN	NaN	NaN	NaN	NaN	NaN	NaN	NaN	2.1283	1.3051	NaN	1.765	NaN	NaN	1.4863	1.2411	1.1739	1.0224	1.549	1.6879	1.3996	NaN	1.4207	1.3014	NaN	NaN	1.2959	1.0641	1.4719	1.0637	NaN	0.75209	0.90427	0.73338	1.0857	1.1742	1.2841	0.9731	1.0041	1.2336
NaN	NaN	NaN	NaN	NaN	NaN	NaN	NaN	NaN	NaN	NaN	NaN	NaN	NaN	NaN	NaN	NaN	NaN	NaN	NaN	NaN	1.6414	NaN	NaN	NaN	1.909	NaN	NaN	1.6035	1.5016	NaN	NaN	NaN	2.0982	3.1572	NaN	NaN	NaN	NaN	NaN	NaN	NaN	NaN	NaN	NaN	NaN	NaN	NaN	NaN	NaN
1.0685	0.61588	0.77191	NaN	0.72754	1.4794	NaN	NaN	NaN	NaN	1.067	0.88645	1.2603	0.63745	1.145	1.175	1.6905	0.9258	NaN	NaN	1.0381	1.7601	NaN	NaN	NaN	1.3163	1.0211	1.6211	1.6035	2.3895	1.5467	1.7858	2.4541	2.9056	3.8447	2.4357	0.92576	NaN	0.95169	0.85483	0.68312	1.3677	1.2312	1.3793	0.77921	0.97717	1.3182	1.1977	1.3921	1.3027
NaN	NaN	NaN	NaN	0.73976	NaN	NaN	NaN	0.11892	NaN	NaN	NaN	NaN	0.32624	0.28188	NaN	NaN	NaN	1.5491	NaN	1.6367	1.6443	NaN	0.50322	0.84961	NaN	NaN	0.57831	1.0111	0.27578	NaN	NaN	NaN	NaN	NaN	NaN	0.73346	0.67776	NaN	0.47787	0.80734	0.39024	0.65818	1.0342	0.74066	NaN	NaN	0.28464	NaN	0.51641
0.96188	1.11	0.76255	1.1604	0.63371	0.87615	0.73251	0.86848	1.1699	0.86496	0.63212	0.61561	0.83706	1.0417	0.71319	0.55868	0.92893	0.40079	1.2575	2.9718	0.93269	0.92357	2.1303	2.6708	1.3992	1.4871	1.6267	1.7709	1.4195	1.8478	1.4958	2.165	2.0396	2.0173	0.99462	1.3785	0.96667	1.479	0.93225	1.0511	0.86918	1.4059	1.0007	1.3803	1.0777	1.0023	1.5269	1.5977	1.3245	1.4836
NaN	NaN	NaN	NaN	NaN	NaN	NaN	NaN	NaN	NaN	NaN	NaN	NaN	NaN	NaN	NaN	NaN	NaN	NaN	NaN	NaN	NaN	NaN	NaN	NaN	NaN	NaN	NaN	NaN	NaN	NaN	NaN	NaN	NaN	NaN	NaN	NaN	NaN	NaN	NaN	1.4383	NaN	NaN	NaN	NaN	NaN	NaN	NaN	NaN	NaN
NaN	NaN	NaN	NaN	NaN	NaN	NaN	NaN	NaN	NaN	NaN	NaN	NaN	NaN	NaN	NaN	NaN	NaN	NaN	NaN	NaN	NaN	NaN	NaN	NaN	NaN	NaN	2.0818	NaN	NaN	NaN	NaN	NaN	NaN	NaN	NaN	NaN	NaN	NaN	NaN	NaN	NaN	NaN	NaN	NaN	NaN	NaN	NaN	NaN	NaN
NaN	NaN	NaN	NaN	NaN	NaN	1.2056	NaN	NaN	0.9623	NaN	NaN	NaN	NaN	NaN	NaN	NaN	NaN	1.295	NaN	NaN	NaN	1.8527	NaN	NaN	NaN	NaN	NaN	1.5935	1.6898	NaN	NaN	NaN	NaN	NaN	NaN	NaN	NaN	NaN	NaN	NaN	1.4864	NaN	NaN	NaN	NaN	NaN	NaN	NaN	NaN
NaN	NaN	NaN	NaN	NaN	NaN	1.2056	1.1162	NaN	0.9623	NaN	NaN	NaN	NaN	NaN	NaN	NaN	NaN	1.295	1.9437	1.2553	1.2262	1.8527	NaN	NaN	NaN	NaN	2.0818	1.5935	1.6898	NaN	NaN	NaN	NaN	NaN	NaN	NaN	NaN	NaN	NaN	1.4383	1.4864	NaN	NaN	NaN	NaN	NaN	NaN	NaN	NaN
1.0045	1.0263	0.93835	0.65941	1.008	0.85208	0.75494	0.83795	0.47989	0.60012	0.64804	0.47312	0.24356	0.15218	0.13713	0.083403	0.1611	0.070534	1.2259	1.2403	1.3883	1.1839	1.2051	1.3077	1.3474	1.5186	1.3154	1.2187	1.2943	1.089	0.65732	0.30744	0.26845	0.23328	0.18903	0.20594	0.9428	1.2036	0.94508	1.4287	0.98645	0.85516	0.75268	0.60068	0.65933	0.5405	0.78526	0.44433	0.29646	0.29996
0.89178	0.6842	0.37374	0.23548	NaN	0.13271	0.049468	0.040103	0.011659	NaN	NaN	0.026103	NaN	NaN	NaN	NaN	NaN	NaN	1.1703	1.6276	0.67197	0.57739	0.51537	0.35499	0.27812	0.15662	0.14904	0.063783	0.090708	NaN	NaN	NaN	NaN	NaN	NaN	NaN	0.90473	0.59173	0.34044	0.21806	0.12717	0.089189	0.083192	0.06704	NaN	NaN	NaN	NaN	NaN	NaN
0.78346	0.96556	0.99224	NaN	NaN	0.70674	0.85583	0.77963	0.60844	NaN	0.72272	NaN	NaN	NaN	NaN	NaN	NaN	NaN	1.2539	1.2977	1.1833	NaN	NaN	NaN	NaN	NaN	NaN	1.2948	1.7667	NaN	NaN	NaN	NaN	0.63742	NaN	NaN	0.89898	NaN	0.87747	0.89294	NaN	NaN	NaN	NaN	NaN	NaN	NaN	NaN	NaN	NaN
NaN	NaN	NaN	NaN	NaN	NaN	NaN	NaN	NaN	NaN	NaN	NaN	NaN	NaN	NaN	NaN	NaN	NaN	NaN	NaN	NaN	NaN	NaN	NaN	NaN	NaN	NaN	NaN	NaN	NaN	NaN	NaN	NaN	NaN	NaN	NaN	NaN	NaN	NaN	NaN	NaN	NaN	NaN	NaN	NaN	NaN	NaN	NaN	NaN	NaN
NaN	NaN	NaN	NaN	NaN	NaN	NaN	NaN	NaN	NaN	NaN	NaN	NaN	NaN	NaN	NaN	NaN	1.0203	NaN	NaN	NaN	NaN	NaN	NaN	NaN	NaN	NaN	NaN	NaN	NaN	NaN	NaN	NaN	NaN	NaN	NaN	NaN	NaN	NaN	NaN	NaN	NaN	NaN	NaN	NaN	NaN	NaN	NaN	NaN	NaN
NaN	NaN	NaN	NaN	NaN	NaN	0.63817	0.59241	NaN	NaN	NaN	NaN	NaN	NaN	NaN	NaN	NaN	NaN	NaN	NaN	NaN	NaN	NaN	NaN	NaN	NaN	NaN	NaN	NaN	1.0027	NaN	NaN	NaN	NaN	NaN	NaN	1.0064	NaN	NaN	0.91085	NaN	1.2884	NaN	0.86956	0.81218	0.74432	0.68856	NaN	NaN	NaN
NaN	NaN	NaN	1.0679	NaN	NaN	NaN	NaN	NaN	NaN	NaN	NaN	NaN	NaN	NaN	NaN	NaN	NaN	NaN	2.3565	NaN	NaN	2.5017	1.9497	NaN	NaN	1.5585	1.6363	1.375	NaN	NaN	NaN	NaN	NaN	NaN	NaN	NaN	NaN	NaN	NaN	0.96613	NaN	NaN	NaN	NaN	NaN	NaN	NaN	NaN	NaN
NaN	NaN	NaN	NaN	NaN	NaN	NaN	NaN	NaN	NaN	NaN	NaN	NaN	NaN	NaN	NaN	NaN	NaN	NaN	NaN	NaN	NaN	NaN	NaN	NaN	NaN	NaN	NaN	NaN	NaN	NaN	NaN	NaN	NaN	NaN	NaN	NaN	NaN	NaN	NaN	NaN	NaN	NaN	NaN	NaN	NaN	NaN	NaN	NaN	NaN
0.97411	1.0078	0.82598	0.47459	0.82046	1.094	0.80213	0.94333	0.44619	0.66069	0.93188	0.98912	0.70685	0.81641	0.83328	0.51557	1.4765	0.49544	1.2849	0.8337	1.2309	1.2723	1.4858	1.427	1.3616	1.4587	1.3045	1.4824	1.4923	1.74	1.4075	1.3669	1.3559	1.2666	NaN	0.96416	1.0436	1.0014	0.77111	0.77969	0.96333	0.86978	0.87382	0.49035	0.60151	0.71065	1.0129	1.111	1.066	1.1508
0.95708	1.4024	0.80784	0.97744	0.8531	0.94408	0.89736	1.0284	0.96484	0.86155	0.98174	0.93984	1.0157	1.1475	1.024	0.71519	1.3701	0.58401	1.2565	2.3084	1.2947	0.92907	2.0012	1.9687	1.4984	2.217	1.9929	2.0756	1.3045	1.7826	2.5848	1.9442	1.8852	1.7504	1.4123	1.5621	0.85779	1.4588	0.93951	0.77827	1.0143	1.2213	0.82509	0.95126	0.99926	0.96367	1.2831	1.0641	1.2142	1.5517
0.90321	0.97357	0.72041	0.66789	0.832	0.78088	0.66997	0.84862	0.72471	0.63935	0.75317	0.78376	0.85158	0.88382	0.6093	0.59135	0.98266	NaN	1.2872	1.5945	NaN	NaN	NaN	1.544	1.2777	1.1844	1.4412	1.678	1.3009	1.29	1.5519	NaN	1.8252	1.5753	1.3242	1.359	1.0064	NaN	0.79752	0.87784	0.96453	0.85293	0.84571	NaN	0.99781	1.0353	1.0751	1.223	1.0669	1.1124
0.90321	0.97357	0.72041	0.66789	0.832	0.78088	0.66997	0.84862	0.72471	0.63935	0.75317	0.78376	0.85158	0.88382	0.6093	0.59135	0.98266	NaN	1.2872	1.5945	NaN	NaN	NaN	1.544	1.2777	1.1844	1.4412	1.678	1.3009	1.29	1.5519	NaN	1.8252	1.5753	1.3242	1.359	1.0064	NaN	0.79752	0.87784	0.96453	0.85293	0.84571	NaN	0.99781	1.0353	1.0751	1.223	1.0669	1.1124
NaN	1.688	0.92836	1.2386	1.122	1.1122	1.1291	1.2908	1.4306	NaN	1.0715	0.83803	NaN	NaN	1.2737	NaN	NaN	1.1043	NaN	2.7484	1.1048	0.7851	NaN	2.8252	2.3597	2.1062	2.288	2.2116	1.4007	2.2392	3.0636	2.9782	2.9165	2.6185	1.279	2.6582	1.0803	NaN	0.67764	1.7324	1.9301	NaN	1.1507	1.5512	2.2815	2.1002	1.4693	1.8049	2.2113	2.3316
0.91552	1.1936	0.87081	0.56699	0.85895	0.78579	0.65883	1.081	0.64719	0.78423	0.85511	0.74641	0.77961	0.76299	0.88622	0.64344	1.0834	0.47752	1.0121	1.3674	1.4976	1.4526	1.1834	1.5417	1.5794	1.4044	1.4547	1.2629	1.54	1.6671	1.5146	1.8535	1.5837	1.6865	1.4077	1.1485	0.98833	NaN	1.0276	1.1306	0.83034	1.0383	1.1809	0.63811	0.796	0.79471	1.1598	1.1407	1.2966	1.3993
0.90654	NaN	NaN	NaN	0.92451	NaN	NaN	NaN	0.6237	NaN	NaN	NaN	NaN	NaN	NaN	NaN	NaN	NaN	NaN	NaN	NaN	NaN	NaN	NaN	NaN	NaN	NaN	NaN	NaN	NaN	NaN	NaN	NaN	NaN	NaN	NaN	NaN	NaN	NaN	0.85528	NaN	NaN	0.86891	NaN	NaN	NaN	NaN	0.45682	NaN	NaN
0.90654	NaN	NaN	NaN	NaN	NaN	NaN	NaN	NaN	NaN	NaN	NaN	NaN	NaN	NaN	NaN	NaN	NaN	NaN	NaN	NaN	NaN	NaN	NaN	NaN	NaN	NaN	NaN	NaN	NaN	NaN	NaN	NaN	NaN	NaN	NaN	NaN	NaN	NaN	0.85528	NaN	NaN	0.86891	NaN	NaN	NaN	NaN	0.45682	NaN	NaN
NaN	NaN	NaN	NaN	NaN	NaN	NaN	NaN	NaN	NaN	NaN	NaN	NaN	NaN	NaN	NaN	NaN	NaN	NaN	NaN	NaN	NaN	NaN	NaN	NaN	NaN	NaN	NaN	NaN	NaN	NaN	NaN	NaN	NaN	NaN	NaN	NaN	NaN	NaN	NaN	NaN	NaN	NaN	NaN	NaN	NaN	NaN	NaN	NaN	NaN
0.9453	1.1269	0.64209	0.9115	0.94077	1.0081	0.76062	1.1166	1.0086	0.84808	1.1611	0.97508	0.9803	1.1735	0.81428	0.85752	1.2555	0.53864	1.3433	1.9848	0.80512	0.72438	NaN	1.6326	1.8125	1.7811	1.6029	2.3682	1.5229	1.6124	1.7246	2.5001	2.049	2.4879	1.5033	1.8916	1.1239	1.7328	0.80878	1.2543	1.0579	1.2287	0.90449	1.1498	0.97191	0.95891	1.09	2.0581	1.431	1.5139
NaN	NaN	NaN	NaN	NaN	NaN	NaN	NaN	NaN	NaN	NaN	NaN	NaN	NaN	NaN	NaN	NaN	NaN	1.3106	1.8967	1.2648	1.1545	2.0694	1.6542	1.6204	1.8386	NaN	NaN	1.7768	1.3485	2.0363	NaN	NaN	NaN	1.7676	NaN	NaN	NaN	NaN	NaN	NaN	NaN	NaN	NaN	NaN	NaN	NaN	NaN	NaN	NaN
NaN	NaN	NaN	NaN	NaN	NaN	NaN	NaN	NaN	NaN	NaN	NaN	NaN	NaN	NaN	NaN	NaN	NaN	NaN	NaN	NaN	NaN	NaN	NaN	NaN	NaN	NaN	NaN	NaN	NaN	NaN	NaN	NaN	NaN	NaN	NaN	NaN	NaN	NaN	NaN	NaN	NaN	NaN	NaN	NaN	NaN	NaN	NaN	NaN	NaN
NaN	NaN	0.87881	NaN	NaN	NaN	NaN	NaN	NaN	NaN	NaN	NaN	NaN	NaN	NaN	NaN	NaN	NaN	1.3158	NaN	1.1484	0.85732	NaN	1.3664	1.7486	1.3071	1.6179	1.5798	1.4914	1.3412	1.8889	1.5994	1.7511	1.7783	1.471	1.5	0.60726	NaN	1.1589	1.0302	0.65505	0.9822	NaN	NaN	NaN	0.93028	0.74602	0.59762	1.1029	1.0539
0.93674	1.1208	0.87881	1.0825	1.0066	1.0861	0.7506	1.0448	1.1883	0.89335	0.85526	0.99651	0.88541	0.88465	0.69418	0.62004	1.1338	0.81802	1.3122	1.6274	1.4909	0.86488	NaN	1.3387	1.251	1.2756	1.4884	1.9702	1.3818	1.4468	2.0593	1.7711	2.8561	1.4642	1.4473	1.3516	1.0299	NaN	1.064	0.81175	1.1227	0.9798	0.95697	1.2979	1.1304	1.4562	1.1996	1.1617	1.1573	1.4972
0.93674	1.1208	0.87881	1.0825	1.0066	1.0861	0.7506	1.0448	1.1883	0.89335	0.85526	0.99651	0.88541	0.88465	0.69418	0.62004	1.1338	0.81802	1.3122	1.7339	1.3085	0.8611	NaN	1.3525	1.6733	1.2913	1.5518	1.5798	1.4356	1.393	1.9992	1.6831	1.8506	1.6136	1.4591	1.4239	0.79085	NaN	1.1333	0.91446	0.85757	0.981	0.95697	1.2979	1.1304	1.1639	0.94599	0.83323	1.1029	1.0539
0.95786	1.4005	NaN	1.1115	0.70501	0.82542	0.79554	0.88778	0.94122	0.90236	0.61541	NaN	0.76891	0.83447	0.56513	0.36304	0.47595	NaN	1.1118	2.7162	0.75766	1.0828	NaN	2.1449	1.7564	NaN	1.6536	2.1149	1.8178	1.7323	1.7299	2.0085	2.0896	1.2556	0.78878	0.73093	0.93806	1.8318	NaN	NaN	0.89224	1.3202	0.98631	1.9487	NaN	1.9447	1.339	1.3205	1.4567	1.1781
NaN	NaN	NaN	NaN	NaN	NaN	0.79554	NaN	NaN	0.90236	NaN	NaN	NaN	NaN	NaN	NaN	0.47595	NaN	NaN	NaN	NaN	NaN	NaN	NaN	NaN	NaN	NaN	NaN	NaN	NaN	NaN	NaN	NaN	NaN	NaN	NaN	NaN	1.8318	NaN	NaN	0.90797	NaN	NaN	NaN	NaN	NaN	NaN	NaN	1.51	1.107
0.95786	NaN	NaN	NaN	0.73598	NaN	NaN	0.85071	0.9431	NaN	0.61541	0.65969	0.76891	0.66009	0.55951	0.36983	0.5536	0.22703	NaN	2.8756	NaN	0.99434	NaN	NaN	1.5514	2.2002	1.5602	1.8688	NaN	1.9433	1.7299	NaN	2.0896	1.1425	0.78878	NaN	0.89235	NaN	NaN	NaN	0.87677	1.3202	NaN	2.0304	NaN	NaN	1.3782	1.2475	1.4054	1.2538
NaN	NaN	NaN	NaN	NaN	0.81449	NaN	NaN	NaN	0.76216	NaN	NaN	NaN	NaN	0.58868	NaN	0.68994	NaN	1.2951	NaN	NaN	NaN	NaN	1.5746	NaN	1.3909	NaN	1.6158	1.6832	NaN	NaN	NaN	NaN	1.239	NaN	NaN	NaN	NaN	1.2876	1.1273	NaN	1.0447	NaN	NaN	NaN	NaN	NaN	NaN	1.089	1.0093
NaN	NaN	0.92657	0.78816	0.7011	NaN	0.7714	0.97628	0.77556	NaN	0.88235	0.86177	0.67333	0.80977	NaN	NaN	0.68994	NaN	1.2951	NaN	NaN	NaN	2.0563	NaN	1.4461	NaN	NaN	NaN	NaN	1.6882	1.35	1.3548	1.326	NaN	NaN	0.87813	NaN	NaN	1.2876	NaN	0.9439	NaN	1.05	NaN	NaN	0.76057	1.1731	NaN	1.089	NaN
2.0555	2.1457	1.1571	0.85977	1.1295	1.1712	0.95899	1.5155	NaN	1.3469	0.83852	NaN	0.96843	0.81112	3.2357	0.66741	1.1066	NaN	1.7074	NaN	1.406	1.4946	NaN	1.5153	1.9806	2.458	1.8328	2.529	1.8696	2.5588	2.6854	1.9357	6.1723	1.4965	1.9645	NaN	1.0276	NaN	1.0529	1.0611	1.1764	1.2106	0.99606	0.9252	1.0009	1.0355	1.2524	NaN	1.1448	NaN
2.0555	2.1457	1.1571	0.85977	1.1295	1.1712	0.95899	1.5155	NaN	1.3469	0.83852	NaN	0.96843	0.81112	3.2357	0.66741	1.1066	NaN	1.7074	NaN	1.406	1.4946	NaN	1.5153	1.9806	2.458	1.8328	2.529	1.8696	2.5588	2.6854	1.9357	6.1723	1.4965	1.9645	NaN	1.0276	NaN	1.0529	1.0611	1.1764	1.2106	0.99606	0.9252	1.0009	1.0355	1.2524	NaN	1.1448	NaN
0.98285	1.3993	0.77871	1.0916	1.1376	1.3208	0.93554	0.91394	0.44387	0.52308	0.92028	1.0275	0.80284	0.64605	0.82087	0.66577	1.0134	0.34079	1.2764	NaN	1.3091	1.9449	2.1474	2.5659	1.6158	2.0744	1.2931	1.5037	1.4489	2.214	2.2411	2.7402	1.1728	1.8953	1.39	1.3878	0.99716	1.8319	0.75409	1.1249	1.2335	0.64865	0.98423	1.0206	0.63007	1.112	0.86888	0.66179	1.4012	0.82561
1.2277	1.2299	NaN	NaN	1.3266	NaN	0.94626	NaN	NaN	0.76372	1.145	0.99875	NaN	0.81	NaN	0.33625	NaN	0.32795	NaN	1.7133	NaN	2.1577	NaN	NaN	NaN	1.7717	1.6374	NaN	1.7497	NaN	2.1672	1.4425	NaN	0.4914	NaN	NaN	NaN	1.4934	1.2583	NaN	NaN	NaN	NaN	1.307	1.1374	0.93736	NaN	NaN	1.0971	1.2101
1.0039	1.2833	1.1037	1.011	0.91927	0.97377	0.95761	1.0254	0.82319	0.84534	0.92002	1.0891	1.1993	0.88341	1.0761	0.63835	1.1844	0.70826	1.3886	1.5466	1.6876	1.5598	1.5169	1.6528	1.7392	1.7935	1.8244	1.751	1.7736	2.2998	1.9426	1.8583	1.6889	1.6443	1.7787	1.4249	1.1648	1.3694	1.0614	1.1589	1.3122	1.1076	1.2667	1.0724	1.0836	1.1504	1.2285	1.2322	1.4977	1.3152
0.92737	1.1406	0.66844	0.72667	0.77022	0.95427	0.81959	0.91186	0.91102	0.89651	1.0277	0.81661	0.92069	0.9767	0.84766	0.68678	1.0531	0.63469	1.0517	2.0643	0.92323	0.78202	1.8678	1.6617	1.337	1.7925	1.6234	1.9971	1.4157	1.6351	2.0775	1.8285	1.7663	1.7016	1.1091	1.7102	0.96068	1.4992	0.7601	0.95805	1.2126	1.288	0.8684	1.1209	1.1305	1.1021	0.97463	1.2515	1.2587	1.488
NaN	NaN	NaN	NaN	NaN	NaN	NaN	0.98475	NaN	0.79375	NaN	NaN	NaN	NaN	NaN	NaN	NaN	NaN	NaN	NaN	NaN	NaN	NaN	2.1552	1.8887	NaN	NaN	NaN	1.4587	NaN	NaN	NaN	NaN	NaN	NaN	NaN	NaN	NaN	NaN	NaN	NaN	NaN	NaN	0.99646	NaN	NaN	NaN	NaN	0.36523	NaN
1.0871	NaN	NaN	NaN	NaN	NaN	NaN	NaN	NaN	NaN	NaN	NaN	NaN	NaN	NaN	NaN	NaN	NaN	NaN	NaN	NaN	NaN	NaN	NaN	NaN	NaN	NaN	NaN	NaN	NaN	NaN	NaN	NaN	NaN	NaN	NaN	NaN	NaN	NaN	NaN	NaN	NaN	NaN	NaN	NaN	NaN	NaN	NaN	NaN	NaN
NaN	NaN	NaN	NaN	1.2365	1.187	1.0628	1.0124	NaN	NaN	0.97919	NaN	NaN	0.23845	0.11093	0.12882	NaN	NaN	NaN	NaN	NaN	NaN	NaN	NaN	NaN	NaN	NaN	NaN	NaN	NaN	NaN	0.56115	NaN	NaN	NaN	0.16992	NaN	NaN	NaN	NaN	1.2171	NaN	NaN	NaN	NaN	0.9114	1.141	NaN	NaN	NaN
1.0161	0.66994	0.57644	0.73505	0.39002	0.40647	0.45982	0.49123	0.50432	0.26628	0.35661	NaN	NaN	NaN	NaN	NaN	NaN	NaN	1.0594	2.3765	0.87477	0.92007	NaN	NaN	1.1018	0.94571	0.81841	1.013	0.89791	NaN	NaN	NaN	NaN	NaN	NaN	NaN	0.76291	0.91809	0.48496	0.47401	0.8121	0.60964	0.74676	1.4304	0.36393	0.32538	0.41004	NaN	NaN	NaN
1.0234	0.65968	0.57644	0.73505	0.39002	0.40647	0.45982	0.4938	0.43595	0.26628	0.35661	NaN	NaN	NaN	NaN	NaN	NaN	NaN	1.0099	2.3765	2.7925	0.92007	NaN	NaN	1.3885	0.82817	0.81841	1.2573	1.0833	NaN	NaN	NaN	NaN	NaN	NaN	NaN	0.76291	1.2418	0.48496	0.47401	0.8121	0.60964	0.74676	1.4304	0.36393	0.32538	0.41004	NaN	NaN	NaN
NaN	NaN	0.66539	0.6593	1.1754	0.99783	0.7798	0.90793	NaN	NaN	0.62637	NaN	NaN	NaN	NaN	NaN	NaN	NaN	NaN	1.0154	1.082	0.8455	2.1159	1.3842	2.0073	NaN	1.7045	1.4938	NaN	NaN	0.4578	NaN	NaN	NaN	NaN	NaN	NaN	NaN	NaN	NaN	NaN	NaN	NaN	NaN	NaN	NaN	NaN	NaN	NaN	NaN
NaN	NaN	0.66539	0.6593	1.1754	0.99783	0.7798	0.90793	NaN	NaN	0.62637	NaN	NaN	NaN	NaN	NaN	NaN	NaN	NaN	1.0154	1.082	0.8455	2.1159	1.3842	2.0073	NaN	1.7045	1.4938	NaN	0.61637	0.4578	NaN	NaN	NaN	NaN	NaN	NaN	NaN	NaN	NaN	NaN	NaN	NaN	NaN	NaN	NaN	NaN	NaN	NaN	NaN
NaN	NaN	0.66539	0.6593	1.1754	0.99783	0.7798	0.90793	NaN	NaN	0.62637	NaN	NaN	NaN	NaN	NaN	NaN	NaN	NaN	NaN	NaN	NaN	NaN	NaN	NaN	NaN	NaN	NaN	NaN	0.61637	NaN	NaN	NaN	NaN	NaN	NaN	NaN	NaN	NaN	NaN	1.3155	1.0183	NaN	0.57433	NaN	0.72953	0.42279	NaN	NaN	NaN
NaN	NaN	NaN	NaN	NaN	NaN	NaN	NaN	NaN	NaN	NaN	NaN	NaN	NaN	NaN	NaN	NaN	NaN	NaN	NaN	NaN	NaN	NaN	NaN	NaN	NaN	NaN	NaN	NaN	NaN	NaN	NaN	NaN	NaN	NaN	NaN	NaN	NaN	NaN	NaN	NaN	NaN	NaN	NaN	NaN	NaN	NaN	NaN	NaN	NaN
NaN	NaN	NaN	NaN	NaN	NaN	NaN	NaN	NaN	NaN	NaN	NaN	NaN	NaN	NaN	NaN	NaN	NaN	NaN	NaN	NaN	NaN	NaN	NaN	NaN	NaN	NaN	NaN	NaN	NaN	NaN	NaN	NaN	NaN	NaN	NaN	NaN	NaN	NaN	NaN	NaN	NaN	NaN	NaN	NaN	NaN	NaN	NaN	NaN	NaN
NaN	NaN	NaN	0.51931	2.4981	NaN	NaN	NaN	NaN	NaN	NaN	2.1217	NaN	1.3697	1.5732	NaN	NaN	NaN	NaN	0.97938	1.2104	NaN	1.1875	NaN	NaN	NaN	1.749	NaN	NaN	1.279	NaN	NaN	1.3944	NaN	NaN	NaN	0.86975	1.2844	0.87941	NaN	1.5387	NaN	NaN	NaN	NaN	NaN	NaN	1.3719	NaN	1.191
NaN	NaN	NaN	NaN	NaN	NaN	NaN	NaN	NaN	NaN	NaN	NaN	NaN	NaN	NaN	NaN	NaN	NaN	NaN	NaN	NaN	NaN	NaN	NaN	NaN	NaN	NaN	NaN	NaN	NaN	NaN	NaN	NaN	NaN	NaN	NaN	NaN	NaN	NaN	NaN	1.3758	1.7576	NaN	NaN	NaN	NaN	NaN	NaN	NaN	1.981
1.2036	NaN	NaN	NaN	1.1617	NaN	1.3347	1.2191	0.76772	NaN	NaN	1.3244	NaN	NaN	0.61489	NaN	NaN	0.77693	NaN	NaN	0.81634	NaN	NaN	NaN	NaN	NaN	NaN	NaN	1.9731	2.3817	NaN	NaN	NaN	1.8755	NaN	NaN	NaN	NaN	NaN	NaN	NaN	NaN	NaN	NaN	NaN	NaN	NaN	NaN	NaN	NaN
NaN	NaN	NaN	NaN	NaN	NaN	NaN	NaN	NaN	NaN	NaN	NaN	NaN	NaN	NaN	NaN	NaN	NaN	NaN	NaN	NaN	NaN	NaN	NaN	NaN	NaN	NaN	NaN	NaN	NaN	NaN	NaN	NaN	NaN	NaN	NaN	NaN	NaN	NaN	NaN	NaN	NaN	NaN	NaN	NaN	NaN	NaN	NaN	NaN	NaN
NaN	NaN	NaN	NaN	NaN	NaN	NaN	NaN	NaN	NaN	NaN	NaN	NaN	NaN	NaN	NaN	NaN	NaN	NaN	NaN	NaN	NaN	NaN	NaN	NaN	NaN	1.2624	NaN	NaN	NaN	NaN	NaN	NaN	NaN	NaN	NaN	NaN	NaN	NaN	NaN	NaN	NaN	NaN	NaN	NaN	NaN	NaN	NaN	NaN	NaN
NaN	NaN	NaN	NaN	NaN	NaN	NaN	NaN	NaN	NaN	NaN	NaN	NaN	NaN	NaN	NaN	NaN	NaN	NaN	NaN	NaN	NaN	NaN	NaN	NaN	NaN	NaN	NaN	NaN	NaN	NaN	NaN	NaN	NaN	NaN	NaN	NaN	NaN	NaN	NaN	NaN	NaN	NaN	NaN	NaN	NaN	NaN	NaN	NaN	NaN
NaN	NaN	NaN	NaN	NaN	NaN	NaN	NaN	NaN	NaN	NaN	NaN	NaN	NaN	NaN	NaN	NaN	NaN	NaN	NaN	NaN	NaN	NaN	NaN	NaN	NaN	NaN	NaN	NaN	NaN	NaN	NaN	NaN	NaN	NaN	NaN	NaN	NaN	NaN	1.0282	NaN	1.2924	1.1225	2.0178	1.9138	NaN	2.073	1.7412	1.3999	2.3094
NaN	NaN	NaN	NaN	NaN	0.86938	NaN	NaN	NaN	NaN	NaN	NaN	NaN	NaN	NaN	NaN	NaN	NaN	NaN	NaN	NaN	1.3267	NaN	NaN	NaN	NaN	NaN	NaN	NaN	NaN	NaN	NaN	NaN	NaN	NaN	NaN	NaN	NaN	NaN	NaN	NaN	NaN	NaN	NaN	NaN	NaN	NaN	NaN	NaN	NaN
0.99189	1.2137	0.90872	1.0026	1.0287	0.86938	1.1597	1.2324	0.82676	0.88159	0.8043	0.56595	0.47133	0.34636	NaN	NaN	0.21918	NaN	1.2219	2.0635	1.2803	1.3267	2.0459	2.0064	2.2974	2.2299	2.1797	1.9066	1.3968	1.9822	NaN	NaN	NaN	NaN	NaN	NaN	1.1563	1.5708	0.88716	1.3685	1.2632	1.3648	1.2342	0.91854	0.78311	1.1866	0.98054	1.0661	0.68986	0.62821
1.0575	NaN	NaN	1.0378	1.064	NaN	0.73426	1.0909	NaN	NaN	0.92398	0.88091	0.94976	NaN	0.88911	0.61852	0.90504	NaN	1.2341	NaN	NaN	NaN	NaN	NaN	NaN	2.5005	2.1795	1.8224	1.3492	1.5893	2.9355	2.1057	1.997	1.9965	1.8115	1.3884	0.76059	NaN	0.86597	NaN	0.81266	1.3644	1.4864	NaN	1.3433	0.94518	1.3984	1.3437	1.27	1.6589
NaN	1.8082	NaN	1.3936	1.9642	2.0296	1.4983	2.505	1.4727	2.1854	2.6626	3.225	4.0308	2.501	NaN	2.2295	5.4553	3.934	1.3439	1.4623	2.0437	NaN	NaN	NaN	NaN	3.2198	3.6397	3.158	3.8767	4.9962	4.7958	5.4256	5.4347	5.8197	NaN	5.4606	NaN	1.3361	1.801	1.6855	2.2169	1.9257	2.9037	5.0813	4.1411	3.9083	3.1559	3.7003	4.3095	3.1901
NaN	NaN	NaN	NaN	NaN	NaN	NaN	NaN	NaN	NaN	NaN	NaN	NaN	NaN	NaN	NaN	NaN	NaN	NaN	NaN	NaN	NaN	NaN	NaN	NaN	NaN	NaN	NaN	NaN	NaN	NaN	NaN	NaN	NaN	NaN	NaN	NaN	NaN	NaN	NaN	NaN	NaN	NaN	NaN	NaN	NaN	NaN	NaN	NaN	NaN
NaN	NaN	NaN	NaN	NaN	NaN	NaN	NaN	NaN	NaN	NaN	NaN	NaN	NaN	NaN	NaN	NaN	NaN	NaN	NaN	NaN	NaN	NaN	NaN	NaN	NaN	NaN	NaN	NaN	NaN	NaN	NaN	NaN	NaN	NaN	NaN	NaN	NaN	NaN	NaN	NaN	NaN	NaN	NaN	NaN	NaN	NaN	NaN	NaN	NaN
0.99668	1.2064	0.74295	0.78632	0.93542	0.87598	NaN	NaN	NaN	0.79397	0.81458	0.83641	0.66912	NaN	0.51075	0.31954	0.4271	0.17228	1.2239	1.5638	1.039	0.76837	1.8088	NaN	NaN	NaN	1.6413	NaN	1.3165	1.6445	1.7512	1.0412	1.1686	0.80443	0.30939	0.60681	0.97901	1.1008	0.88215	0.98303	NaN	NaN	0.98703	1.0084	NaN	NaN	1.0615	1.2101	NaN	NaN
1.0486	NaN	NaN	NaN	NaN	NaN	NaN	NaN	0.78648	NaN	NaN	NaN	NaN	NaN	NaN	NaN	NaN	NaN	NaN	NaN	NaN	NaN	NaN	NaN	NaN	NaN	NaN	NaN	NaN	NaN	NaN	NaN	NaN	NaN	NaN	NaN	NaN	NaN	NaN	NaN	NaN	NaN	NaN	NaN	NaN	NaN	NaN	NaN	NaN	NaN
NaN	NaN	NaN	NaN	NaN	NaN	NaN	NaN	NaN	NaN	NaN	NaN	NaN	NaN	NaN	NaN	NaN	NaN	NaN	NaN	NaN	NaN	NaN	NaN	NaN	NaN	NaN	NaN	NaN	NaN	NaN	NaN	NaN	NaN	NaN	NaN	NaN	NaN	NaN	NaN	NaN	NaN	NaN	NaN	NaN	NaN	NaN	NaN	NaN	NaN
0.83744	1.1107	0.85779	0.8499	0.91843	1.1185	1.2895	1.144	0.98333	1.0211	1.1085	1.0294	1.1191	1.1041	0.69957	0.74891	0.69221	NaN	1.0392	1.963	NaN	1.007	NaN	2.9125	1.9417	1.805	2.2438	2.1772	1.917	1.9391	2.254	1.7936	1.5015	1.2058	0.61053	0.96061	0.95668	2.081	1.217	1.1691	1.4033	1.6602	0.83133	1.2184	1.2538	1.3493	1.2417	1.284	1.4926	1.0256
0.64943	0.89346	NaN	0.93081	NaN	0.95626	0.72336	0.71039	NaN	0.80867	NaN	0.65086	1.1332	1.0372	0.77601	0.54804	0.85149	0.22072	1.1531	2.7978	1.1086	0.64881	NaN	1.9615	1.6564	1.7313	1.7162	1.645	NaN	NaN	1.7923	NaN	2.8007	2.901	1.2887	NaN	0.97625	NaN	NaN	0.86645	0.96879	1.2553	0.81087	NaN	1.1926	0.97086	0.89096	1.035	NaN	1.4644
NaN	0.93019	NaN	NaN	NaN	NaN	0.83044	NaN	NaN	NaN	NaN	NaN	NaN	NaN	NaN	NaN	NaN	NaN	1.7266	0.53291	1.1295	1.4789	1.144	1.1793	1.6561	1.769	1.2397	1.2435	1.5389	1.3561	1.7746	0.64364	0.68796	0.54855	0.40514	NaN	NaN	0.75741	0.95279	NaN	1.0568	NaN	NaN	0.53566	0.89567	NaN	NaN	0.8357	0.64213	0.56346
NaN	NaN	1.1306	NaN	NaN	NaN	NaN	0.88785	NaN	0.64704	NaN	NaN	0.66128	0.4262	0.41745	NaN	0.2745	0.14605	NaN	NaN	NaN	NaN	NaN	NaN	NaN	NaN	NaN	NaN	NaN	NaN	NaN	NaN	NaN	NaN	NaN	NaN	NaN	NaN	NaN	NaN	NaN	NaN	NaN	NaN	NaN	NaN	0.84609	NaN	NaN	NaN
0.98765	1.1935	NaN	NaN	NaN	NaN	NaN	NaN	NaN	NaN	NaN	NaN	NaN	NaN	NaN	NaN	NaN	NaN	NaN	1.3124	NaN	NaN	NaN	1.2034	NaN	NaN	NaN	NaN	NaN	NaN	NaN	NaN	NaN	NaN	NaN	NaN	NaN	NaN	NaN	NaN	NaN	NaN	NaN	NaN	NaN	NaN	NaN	NaN	NaN	NaN
NaN	NaN	NaN	NaN	0.77518	0.51468	NaN	NaN	NaN	NaN	NaN	NaN	NaN	NaN	NaN	NaN	NaN	NaN	NaN	NaN	NaN	NaN	NaN	NaN	NaN	NaN	1.0062	NaN	NaN	NaN	NaN	NaN	NaN	NaN	NaN	NaN	NaN	NaN	NaN	NaN	NaN	0.67248	NaN	NaN	NaN	NaN	NaN	NaN	NaN	NaN
1.0338	NaN	NaN	NaN	NaN	NaN	NaN	NaN	NaN	NaN	NaN	NaN	NaN	NaN	NaN	NaN	NaN	NaN	1.3849	NaN	2.5009	NaN	NaN	2.5501	NaN	NaN	NaN	NaN	3.2463	3.1209	1.7072	NaN	NaN	NaN	NaN	NaN	NaN	NaN	NaN	NaN	NaN	NaN	NaN	NaN	NaN	NaN	NaN	NaN	NaN	NaN
0.72296	0.6355	0.71817	2.401	0.13254	0.6959	0.59343	0.77486	1.9281	0.64815	0.23163	0.096959	0.4176	1.3178	0.25166	0.3987	NaN	NaN	1.1799	20.402	1.3869	4.7332	6.2556	7.0885	3.2555	1.322	4.9758	5.6206	4.4736	4.0788	1.9494	6.8874	6.6591	4.5881	3.6682	2.91	0.78099	2.1471	2.5423	3.3308	NaN	2.4962	3.5085	4.9849	2.4847	2.3953	0.62047	1.1709	2.6528	2.7577
NaN	NaN	0.71281	0.8311	0.77139	NaN	NaN	NaN	0.54928	NaN	NaN	0.4807	NaN	0.34741	NaN	NaN	NaN	NaN	1.1905	NaN	1.277	1.3665	NaN	NaN	1.4617	1.4431	NaN	NaN	1.2241	NaN	1.4163	1.0166	0.92203	0.73935	0.35152	NaN	NaN	1.3221	0.63753	NaN	0.89314	NaN	0.56632	NaN	NaN	0.69559	NaN	0.77223	NaN	0.19162
1.0515	1.1465	0.66335	0.75923	0.73752	0.83693	0.70315	0.79721	0.67249	0.57092	0.62298	0.45609	0.34605	0.3039	0.20621	NaN	0.15785	NaN	1.2133	1.9992	0.99523	0.87885	2.0792	1.8476	1.6673	1.6193	1.6318	1.6893	1.1697	1.3549	1.1202	0.91615	0.60232	0.46796	0.22301	0.2898	1.018	1.5322	0.78536	0.89957	0.9276	1.0461	0.72163	0.73731	0.74917	0.69797	0.77641	0.64418	0.53308	0.34341
NaN	1.5349	1.0071	NaN	NaN	NaN	NaN	NaN	NaN	NaN	NaN	NaN	NaN	NaN	NaN	NaN	NaN	NaN	NaN	NaN	NaN	NaN	NaN	NaN	NaN	NaN	NaN	NaN	NaN	NaN	NaN	NaN	NaN	NaN	NaN	NaN	1.3305	NaN	NaN	NaN	NaN	NaN	NaN	NaN	NaN	NaN	NaN	NaN	NaN	NaN
1.0693	1.2579	1.0702	0.53553	0.95274	1.3659	0.76958	1.3002	0.50257	0.37258	0.43076	0.32949	NaN	NaN	0.61245	0.86695	1.5732	1.7467	1.2702	NaN	NaN	1.8404	NaN	1.0947	1.9616	1.3367	1.4131	1.5269	1.3682	0.79863	NaN	NaN	NaN	NaN	0.67361	NaN	0.99872	NaN	1.4468	1.6331	1.57	1.8087	1.2498	0.67391	1.3702	0.84732	NaN	NaN	NaN	0.73232
NaN	NaN	NaN	NaN	NaN	NaN	NaN	NaN	NaN	NaN	NaN	NaN	NaN	NaN	NaN	NaN	NaN	NaN	NaN	NaN	NaN	NaN	NaN	NaN	NaN	NaN	NaN	NaN	NaN	NaN	NaN	NaN	NaN	NaN	NaN	NaN	NaN	NaN	NaN	NaN	NaN	NaN	NaN	NaN	NaN	NaN	NaN	NaN	NaN	NaN
NaN	NaN	NaN	NaN	NaN	NaN	NaN	NaN	NaN	NaN	NaN	NaN	NaN	NaN	NaN	NaN	NaN	NaN	0.96513	1.6445	1.7461	2.0069	2.4517	2.016	2.1939	2.4472	2.4783	2.6651	2.12	2.2667	1.3015	1.1163	0.64218	NaN	NaN	NaN	NaN	NaN	NaN	NaN	NaN	NaN	NaN	NaN	NaN	NaN	NaN	NaN	NaN	NaN
1.1843	0.82504	NaN	NaN	0.32463	0.45368	NaN	NaN	NaN	NaN	NaN	NaN	NaN	NaN	NaN	NaN	NaN	NaN	1.5211	1.1076	1.6399	0.83119	NaN	0.83222	NaN	0.60249	0.49682	0.32922	NaN	NaN	NaN	NaN	NaN	NaN	NaN	NaN	1.1383	0.74345	0.82309	0.88044	NaN	NaN	NaN	NaN	NaN	NaN	NaN	NaN	NaN	NaN
NaN	NaN	0.63816	NaN	NaN	NaN	NaN	NaN	NaN	NaN	NaN	NaN	NaN	NaN	NaN	NaN	NaN	NaN	NaN	NaN	NaN	NaN	NaN	NaN	0.68464	NaN	NaN	NaN	NaN	NaN	NaN	NaN	NaN	NaN	NaN	NaN	NaN	NaN	0.82309	NaN	NaN	NaN	NaN	NaN	NaN	NaN	NaN	NaN	NaN	NaN
0.83555	1.4085	0.5103	0.85655	1.0018	1.2003	0.88124	0.99422	1.109	0.95362	0.74594	0.90209	0.61066	0.55034	0.60368	NaN	NaN	NaN	0.987	NaN	0.71304	NaN	NaN	2.3419	2.0376	2.5826	1.7657	2.0004	1.639	NaN	1.8262	1.7663	1.1772	NaN	NaN	0.96933	1.1637	NaN	NaN	1.6776	1.6132	1.7229	0.95345	1.184	1.6646	1.161	NaN	1.8234	NaN	NaN
NaN	NaN	NaN	NaN	NaN	NaN	NaN	NaN	NaN	NaN	NaN	NaN	NaN	NaN	NaN	0.57036	NaN	NaN	NaN	NaN	NaN	NaN	NaN	NaN	NaN	NaN	NaN	NaN	NaN	NaN	NaN	NaN	NaN	NaN	NaN	NaN	NaN	NaN	NaN	NaN	NaN	NaN	NaN	NaN	NaN	NaN	NaN	NaN	NaN	NaN
1.009	0.82777	1.0273	0.67985	1.1912	1.068	0.88833	0.99923	0.68114	NaN	1.0648	NaN	0.91782	0.93927	0.95731	0.65613	1.2873	0.53552	NaN	1.1523	1.4213	NaN	NaN	1.8898	1.1817	1.1292	1.0784	1.8535	1.8031	NaN	1.9018	0.90453	1.6035	1.1308	1.6429	1.4614	NaN	NaN	1.0014	0.79846	NaN	NaN	0.96296	NaN	NaN	NaN	1.5063	1.6837	NaN	1.2572
NaN	NaN	NaN	NaN	0.71402	NaN	0.92604	0.95934	NaN	NaN	0.93535	1.0826	NaN	NaN	NaN	NaN	0.90936	NaN	1.2039	NaN	NaN	NaN	NaN	1.4591	NaN	NaN	1.085	1.712	NaN	2.0761	1.253	1.6373	NaN	NaN	NaN	NaN	1.2102	NaN	NaN	NaN	0.87248	NaN	NaN	NaN	0.57672	1.53	NaN	NaN	NaN	NaN
NaN	NaN	NaN	NaN	NaN	NaN	NaN	NaN	NaN	NaN	NaN	NaN	NaN	NaN	NaN	NaN	NaN	NaN	NaN	NaN	NaN	NaN	NaN	NaN	NaN	NaN	NaN	NaN	NaN	NaN	NaN	NaN	NaN	NaN	NaN	NaN	NaN	NaN	NaN	NaN	NaN	NaN	NaN	NaN	NaN	NaN	NaN	NaN	NaN	NaN
0.92449	1.5034	0.58448	1.3632	0.61963	0.89079	1.0159	0.86973	1.1784	0.77041	0.57126	NaN	0.82599	1.1126	0.7296	0.45158	1.0074	NaN	1.3402	NaN	NaN	1.2894	1.936	1.9495	1.914	NaN	2.4582	NaN	1.8434	1.6325	2.2364	NaN	2.1517	2.1852	NaN	1.6046	1.0788	1.4674	0.95618	1.4014	0.86789	1.904	1.3187	1.2976	1.1391	1.3423	1.8352	2.0429	1.505	1.8227
NaN	NaN	NaN	NaN	NaN	NaN	NaN	NaN	NaN	NaN	NaN	NaN	NaN	NaN	NaN	NaN	NaN	NaN	1.4163	1.3586	1.2437	0.99841	1.2414	NaN	0.84152	0.90539	0.65633	0.53482	0.23107	NaN	NaN	NaN	NaN	NaN	NaN	NaN	NaN	NaN	NaN	NaN	NaN	NaN	NaN	NaN	NaN	NaN	NaN	NaN	NaN	NaN
NaN	NaN	NaN	NaN	NaN	NaN	NaN	NaN	NaN	NaN	NaN	NaN	NaN	NaN	NaN	NaN	NaN	NaN	NaN	NaN	NaN	NaN	NaN	NaN	NaN	NaN	NaN	NaN	NaN	NaN	NaN	NaN	NaN	NaN	NaN	NaN	NaN	NaN	NaN	NaN	NaN	NaN	NaN	NaN	NaN	NaN	NaN	NaN	NaN	NaN
1.0673	0.86892	1.2498	0.6652	1.1119	0.88079	0.77854	0.81248	1.2865	0.61966	0.90447	0.8673	0.85487	0.58329	0.89041	0.57393	1.2632	0.60294	1.052	0.41733	1.301	1.3128	NaN	0.68608	1.0315	1.2693	1.6455	1.17	NaN	2.5278	1.3677	0.77848	0.84159	1.7607	1.7069	1.0811	0.85764	0.69128	0.80566	0.87849	1.0589	0.94064	0.78523	0.67659	0.75712	NaN	1.0806	1.2262	0.76957	1.2313
NaN	1.8623	1.0816	1.0767	1.0924	1.1176	0.92985	1.0009	0.87149	0.7723	NaN	0.53834	NaN	NaN	NaN	0.40491	NaN	NaN	NaN	NaN	NaN	NaN	NaN	NaN	NaN	NaN	NaN	NaN	NaN	NaN	NaN	NaN	NaN	NaN	NaN	NaN	NaN	NaN	NaN	NaN	NaN	NaN	NaN	NaN	NaN	NaN	NaN	NaN	NaN	NaN
0.95555	1.3434	0.95849	1.0203	1.083	1.0145	0.94363	0.91317	0.77516	0.75604	0.67664	0.50824	0.33305	0.2523	0.30405	0.32158	0.58053	0.23258	0.94179	1.8609	1.093	2.059	2.1147	1.987	1.8475	1.9748	1.7562	1.68	1.3094	1.2424	1.0488	0.77702	NaN	NaN	0.44123	1.0707	1.0318	1.3313	0.91915	1.0599	1.1005	1.2229	0.89483	0.96679	0.85484	0.71282	0.81806	0.6797	0.4614	0.61354
NaN	NaN	NaN	NaN	NaN	NaN	NaN	NaN	NaN	NaN	NaN	NaN	NaN	NaN	NaN	NaN	NaN	NaN	NaN	NaN	NaN	NaN	NaN	NaN	NaN	NaN	NaN	NaN	NaN	NaN	NaN	NaN	NaN	NaN	NaN	NaN	NaN	NaN	NaN	NaN	NaN	NaN	NaN	NaN	NaN	NaN	NaN	NaN	NaN	NaN
NaN	1.4209	NaN	NaN	1.5628	NaN	NaN	NaN	NaN	NaN	NaN	NaN	NaN	NaN	NaN	NaN	0.88463	0.3741	NaN	NaN	NaN	NaN	NaN	NaN	NaN	NaN	NaN	NaN	NaN	NaN	NaN	NaN	NaN	NaN	NaN	NaN	NaN	NaN	0.88062	NaN	1.8246	NaN	NaN	1.3979	NaN	0.87453	NaN	1.1071	0.82199	1.0711
1.1755	1.1164	1.2304	1.4467	NaN	0.93108	1.0402	0.91447	0.52373	NaN	0.32959	NaN	NaN	NaN	NaN	NaN	NaN	0.26447	1.3421	1.3115	NaN	1.3205	1.1254	1.6575	1.6605	NaN	1.1414	1.0116	1.259	0.64297	NaN	NaN	NaN	NaN	NaN	NaN	1.1205	NaN	1.1378	NaN	NaN	0.99864	1.4297	1.1221	NaN	0.82125	NaN	NaN	NaN	NaN
1.0877	NaN	1.0491	NaN	1.0142	NaN	0.88832	0.99353	1.2462	0.90324	NaN	NaN	1.0575	NaN	0.88994	1.0136	NaN	0.47478	1.1716	2.6686	NaN	NaN	NaN	2.0664	1.6379	NaN	1.8472	2.1246	1.5238	2.0069	NaN	NaN	2.1878	2.7315	1.3556	NaN	1.0558	NaN	0.88906	NaN	1.202	1.2931	0.8731	NaN	1.0295	NaN	NaN	1.3482	1.5221	1.61
0.87906	0.74396	0.97899	0.49945	0.64197	0.40898	0.50275	0.41139	0.27512	NaN	NaN	NaN	NaN	NaN	NaN	NaN	NaN	NaN	1.3802	1.1567	1.3409	1.3519	NaN	1.0037	1.0991	0.92015	0.89829	0.63966	NaN	NaN	NaN	NaN	NaN	NaN	NaN	NaN	NaN	NaN	NaN	NaN	NaN	NaN	NaN	NaN	NaN	NaN	NaN	NaN	NaN	NaN
0.89891	1.3322	1.9019	1.7165	1.4589	1.5282	1.3417	1.1945	1.429	1.2024	0.91785	0.87356	0.64432	NaN	0.5066	NaN	NaN	NaN	1.228	2.4449	1.7759	1.7157	NaN	2.1827	2.8741	2.4815	2.8378	3.0075	1.7248	2.8229	1.3841	1.1413	0.93262	0.86291	NaN	0.42145	0.84265	2.3577	1.3943	1.0977	1.3666	1.787	1.3836	1.359	1.1414	0.9453	1.1978	1.0305	0.94771	NaN
NaN	NaN	NaN	NaN	NaN	NaN	NaN	NaN	NaN	NaN	NaN	NaN	0.7964	NaN	NaN	NaN	NaN	NaN	NaN	NaN	1.2213	NaN	NaN	NaN	NaN	NaN	NaN	NaN	NaN	NaN	NaN	NaN	NaN	NaN	NaN	NaN	1.089	NaN	NaN	NaN	0.53577	NaN	1.2978	NaN	1.2621	NaN	NaN	1.3006	NaN	NaN
0.97396	0.98422	0.98904	1.0319	0.56862	0.73205	0.88051	0.93463	0.84434	0.71314	0.84894	0.43093	0.78161	0.93055	0.74975	0.7967	0.81662	0.18234	1.4095	1.9984	1.1549	1.6767	1.9056	2.3717	1.7505	1.3511	1.8417	1.3034	1.7042	2.2371	1.5375	2.561	1.9068	0.98543	2.1104	1.1331	1.089	1.4762	1.338	1.3867	0.53577	1.1721	1.2978	1.1268	1.2621	1.3123	1.0087	1.3006	1.5062	1.6887
NaN	NaN	NaN	NaN	NaN	NaN	NaN	NaN	NaN	NaN	NaN	NaN	NaN	NaN	NaN	NaN	NaN	NaN	NaN	NaN	NaN	1.1522	0.64972	0.52966	NaN	NaN	1.3027	1.2164	1.2315	1.2474	NaN	0.86078	0.83795	0.94053	NaN	0.83775	NaN	NaN	NaN	NaN	NaN	NaN	NaN	NaN	NaN	NaN	NaN	NaN	NaN	NaN
NaN	1.2057	0.9231	NaN	NaN	1.0156	0.91806	0.9667	NaN	0.51918	0.98626	NaN	NaN	0.62847	0.96782	0.87542	NaN	NaN	NaN	NaN	NaN	NaN	NaN	NaN	NaN	NaN	NaN	NaN	NaN	NaN	NaN	NaN	NaN	NaN	NaN	NaN	NaN	NaN	0.83647	NaN	0.77155	NaN	NaN	NaN	NaN	0.74053	NaN	1.0469	NaN	NaN
NaN	NaN	NaN	NaN	NaN	NaN	NaN	NaN	NaN	NaN	NaN	NaN	NaN	NaN	NaN	NaN	NaN	NaN	NaN	NaN	NaN	NaN	NaN	NaN	NaN	NaN	NaN	NaN	NaN	NaN	NaN	NaN	NaN	NaN	NaN	NaN	NaN	NaN	NaN	NaN	NaN	NaN	NaN	NaN	NaN	NaN	NaN	NaN	NaN	NaN
0.87108	1.0201	NaN	NaN	NaN	NaN	NaN	NaN	NaN	NaN	NaN	NaN	NaN	NaN	NaN	NaN	NaN	NaN	NaN	NaN	NaN	NaN	NaN	NaN	NaN	NaN	NaN	NaN	NaN	NaN	NaN	NaN	NaN	NaN	NaN	NaN	NaN	NaN	NaN	NaN	NaN	NaN	NaN	NaN	NaN	NaN	NaN	NaN	NaN	NaN
1.1028	0.88787	0.66738	0.69647	0.7545	0.71239	NaN	0.67034	0.44191	NaN	0.59062	0.49872	0.33464	0.21138	NaN	NaN	0.24926	NaN	1.0614	NaN	NaN	1.1682	NaN	NaN	NaN	1.0792	1.2006	1.6563	NaN	NaN	0.95868	NaN	NaN	0.14465	NaN	NaN	1.2372	NaN	1.0089	0.9076	1.0184	NaN	NaN	0.60719	NaN	0.69624	NaN	0.55508	0.40841	0.4089
NaN	NaN	NaN	NaN	NaN	NaN	NaN	NaN	NaN	NaN	NaN	NaN	NaN	NaN	NaN	NaN	NaN	NaN	NaN	NaN	NaN	NaN	NaN	NaN	NaN	NaN	NaN	NaN	NaN	NaN	NaN	NaN	NaN	NaN	NaN	NaN	NaN	NaN	NaN	NaN	NaN	0.95936	NaN	NaN	NaN	NaN	NaN	NaN	NaN	NaN
1.2517	NaN	1.1588	NaN	1.9773	1.0618	1.1701	1.2652	NaN	0.97473	1.2502	0.75017	NaN	NaN	0.54297	NaN	NaN	NaN	1.8232	NaN	1.6649	NaN	NaN	0.63657	1.303	1.9255	1.4037	NaN	0.9435	1.2322	0.99879	NaN	NaN	NaN	NaN	NaN	NaN	NaN	NaN	NaN	NaN	NaN	NaN	NaN	NaN	NaN	NaN	NaN	NaN	NaN
0.94975	NaN	NaN	NaN	0.89915	0.93476	0.72044	NaN	5.6395	NaN	0.75237	0.76737	NaN	0.68727	0.64097	NaN	NaN	NaN	2.0817	NaN	1.3718	NaN	0.96047	NaN	NaN	NaN	1.0247	3.2827	2.6068	NaN	4.0609	1.1646	2.5621	4.2405	NaN	0.61342	NaN	NaN	1.1216	0.8421	5.3846	NaN	0.81399	3.2548	0.71624	NaN	NaN	NaN	NaN	0.86345
NaN	NaN	0.74777	0.77198	NaN	NaN	NaN	NaN	NaN	NaN	NaN	NaN	NaN	NaN	NaN	NaN	NaN	NaN	NaN	NaN	NaN	NaN	NaN	NaN	NaN	NaN	NaN	NaN	NaN	NaN	NaN	NaN	NaN	NaN	NaN	NaN	0.92227	NaN	NaN	NaN	NaN	NaN	NaN	NaN	NaN	0.72712	NaN	NaN	NaN	NaN
1.0014	1.1326	0.86878	1.366	0.38754	0.90762	0.70093	0.92484	1.2388	0.74449	0.55227	0.31609	0.70345	1.2559	0.60781	0.44107	0.69255	0.1753	1.3192	3.7468	1.4089	2.2641	2.6512	3.2105	1.8867	1.4409	1.9776	2.2612	1.6248	2.153	1.7122	2.9618	2.5887	2.6767	2.2829	2.1345	1.0066	1.5223	1.5334	1.5428	0.86425	1.4123	1.6697	0.66506	1.4652	1.2864	1.124	1.2456	1.6322	2.0429
NaN	NaN	NaN	NaN	NaN	NaN	NaN	NaN	NaN	NaN	NaN	NaN	NaN	NaN	NaN	NaN	NaN	NaN	NaN	NaN	NaN	NaN	NaN	NaN	NaN	NaN	NaN	NaN	NaN	NaN	NaN	NaN	NaN	NaN	NaN	NaN	NaN	NaN	NaN	NaN	NaN	NaN	NaN	NaN	NaN	NaN	NaN	NaN	NaN	NaN
NaN	NaN	NaN	NaN	NaN	NaN	NaN	NaN	NaN	NaN	NaN	NaN	NaN	NaN	NaN	NaN	NaN	NaN	NaN	NaN	NaN	NaN	NaN	NaN	NaN	NaN	NaN	NaN	NaN	NaN	NaN	NaN	NaN	NaN	NaN	NaN	NaN	NaN	NaN	NaN	NaN	NaN	NaN	NaN	NaN	NaN	NaN	NaN	NaN	NaN
0.7378	0.87337	0.75216	1.2297	0.56398	0.77458	0.63319	NaN	1.5378	0.90531	0.6659	NaN	0.92815	1.1663	0.83813	NaN	NaN	NaN	1.1957	3.7909	0.82557	1.167	1.8633	2.7239	1.142	1.4378	1.6164	1.7044	1.8454	2.0411	1.3858	2.5039	2.1828	2.425	1.2256	1.1219	0.95763	1.3441	1.5196	0.91679	0.68135	1.1819	1.004	1.9068	1.0665	1.0471	1.9212	2.0906	1.3505	1.5776
0.93052	1.3238	1.4468	2.0427	3.2146	3.3273	NaN	2.8706	2.3582	2.3034	3.6369	2.9154	2.585	2.8025	2.1956	1.2439	NaN	NaN	NaN	NaN	2.6211	NaN	NaN	4.2761	4.9172	NaN	NaN	NaN	4.1531	5.1167	5.476	3.9853	NaN	3.5873	3.4906	NaN	NaN	2.2676	NaN	NaN	3.1754	NaN	2.7951	NaN	2.6738	2.318	2.7946	3.4381	3.385	NaN
NaN	NaN	NaN	NaN	NaN	NaN	NaN	NaN	NaN	NaN	NaN	NaN	NaN	NaN	NaN	NaN	NaN	NaN	NaN	NaN	NaN	2.9544	NaN	NaN	NaN	NaN	4.4029	NaN	NaN	NaN	NaN	NaN	NaN	NaN	NaN	NaN	NaN	NaN	NaN	NaN	NaN	NaN	NaN	NaN	NaN	NaN	NaN	NaN	NaN	NaN
0.84856	0.5558	0.38697	NaN	NaN	NaN	NaN	NaN	NaN	NaN	NaN	NaN	NaN	NaN	NaN	NaN	NaN	NaN	1.0572	1.7161	NaN	1.3677	NaN	NaN	1.0017	NaN	NaN	0.48957	0.43948	NaN	NaN	NaN	NaN	NaN	NaN	NaN	1.0181	NaN	0.74166	NaN	NaN	0.41746	NaN	NaN	NaN	NaN	NaN	NaN	NaN	NaN
NaN	NaN	NaN	NaN	NaN	NaN	NaN	NaN	NaN	NaN	NaN	NaN	NaN	NaN	NaN	NaN	NaN	NaN	1.6975	NaN	NaN	NaN	1.5139	NaN	NaN	NaN	NaN	NaN	NaN	NaN	NaN	NaN	NaN	NaN	NaN	NaN	0.83428	0.95829	0.55287	0.5367	0.38799	0.3651	0.33775	NaN	NaN	NaN	NaN	NaN	NaN	NaN
NaN	NaN	NaN	NaN	NaN	NaN	NaN	NaN	NaN	NaN	NaN	NaN	NaN	NaN	NaN	NaN	NaN	NaN	NaN	2.8265	NaN	NaN	NaN	NaN	NaN	NaN	NaN	0.61007	NaN	NaN	NaN	NaN	NaN	NaN	NaN	NaN	NaN	NaN	NaN	NaN	NaN	NaN	NaN	NaN	NaN	NaN	NaN	NaN	NaN	NaN
NaN	NaN	NaN	NaN	NaN	NaN	NaN	NaN	NaN	NaN	NaN	NaN	NaN	NaN	NaN	NaN	NaN	NaN	NaN	NaN	NaN	NaN	NaN	NaN	NaN	NaN	NaN	NaN	NaN	NaN	NaN	NaN	NaN	NaN	NaN	NaN	NaN	NaN	NaN	NaN	NaN	NaN	NaN	NaN	NaN	NaN	NaN	NaN	NaN	NaN
1.1176	1.3348	0.68298	0.8443	1.0976	0.89788	0.90958	1.1466	0.97154	0.98867	NaN	0.80619	1.3319	1.2609	1.2723	0.76451	1.2956	0.6288	1.3401	NaN	0.77172	NaN	NaN	2.4577	1.9798	1.5111	1.7754	2.1991	1.7537	NaN	NaN	NaN	2.4196	2.3542	1.4122	1.85	1.6695	1.331	NaN	NaN	1.1405	1.4873	NaN	NaN	NaN	1.5798	NaN	1.6756	1.4288	1.9893
NaN	NaN	NaN	NaN	NaN	NaN	NaN	NaN	NaN	NaN	0.84294	0.80619	NaN	1.2609	NaN	NaN	NaN	NaN	NaN	NaN	NaN	NaN	NaN	NaN	NaN	NaN	NaN	NaN	NaN	NaN	NaN	NaN	NaN	NaN	NaN	NaN	NaN	NaN	NaN	NaN	NaN	NaN	NaN	NaN	NaN	NaN	NaN	NaN	NaN	NaN
NaN	NaN	NaN	NaN	NaN	NaN	NaN	NaN	NaN	NaN	NaN	NaN	NaN	NaN	NaN	NaN	NaN	NaN	NaN	NaN	NaN	NaN	NaN	NaN	NaN	NaN	NaN	NaN	NaN	NaN	NaN	13.989	NaN	NaN	NaN	NaN	NaN	NaN	NaN	NaN	NaN	NaN	NaN	NaN	NaN	NaN	NaN	NaN	NaN	NaN
0.78354	1.5384	1.8545	NaN	2.2914	NaN	2.4711	2.3424	2.0875	NaN	3.1236	NaN	NaN	2.5311	1.3865	NaN	NaN	1.3557	NaN	1.0866	2.0819	2.0877	NaN	NaN	NaN	NaN	3.0724	NaN	NaN	NaN	4.0147	NaN	NaN	2.8616	NaN	4.6352	NaN	NaN	NaN	1.4748	NaN	NaN	NaN	NaN	NaN	1.8294	NaN	3.1618	1.7444	2.3543
NaN	NaN	NaN	NaN	2.1268	1.5891	NaN	NaN	NaN	0.86873	1.1567	1.6952	NaN	NaN	0.68191	NaN	NaN	NaN	NaN	NaN	NaN	NaN	NaN	NaN	NaN	NaN	NaN	NaN	NaN	NaN	NaN	NaN	NaN	NaN	NaN	NaN	NaN	NaN	NaN	NaN	NaN	NaN	NaN	NaN	NaN	NaN	NaN	NaN	NaN	NaN
0.8227	0.87771	0.95023	1.0132	0.54855	0.71196	0.62071	0.7508	0.76684	0.68239	0.52827	0.50737	0.51301	NaN	0.38071	0.21552	0.34694	NaN	0.92907	2.1128	0.76257	1.1388	1.8663	2.1403	0.96033	1.0034	1.2567	1.5598	1.3471	1.7442	1.2427	0.97867	1.8337	0.8998	0.58968	0.39479	0.84607	NaN	0.84003	1.1772	0.68453	1.0213	0.68261	0.8629	0.9642	0.68288	1.5655	0.86286	0.78763	0.84474
NaN	NaN	NaN	NaN	NaN	NaN	NaN	NaN	NaN	NaN	NaN	NaN	NaN	NaN	NaN	NaN	NaN	NaN	NaN	1.6461	1.0999	1.9833	NaN	NaN	NaN	NaN	NaN	NaN	NaN	NaN	NaN	NaN	NaN	NaN	NaN	NaN	NaN	NaN	NaN	NaN	NaN	NaN	NaN	NaN	NaN	NaN	NaN	NaN	NaN	NaN
NaN	NaN	0.73049	0.83147	NaN	0.88574	NaN	1.0197	0.38848	0.47798	0.45981	NaN	NaN	NaN	NaN	NaN	NaN	NaN	NaN	1.6589	1.2135	0.78056	1.8325	1.7208	1.5736	1.4553	NaN	0.89848	1.0012	0.66209	0.45835	NaN	NaN	NaN	NaN	NaN	1.0495	1.2239	NaN	1.0151	0.99059	1.0875	1.1785	1.056	NaN	NaN	NaN	NaN	NaN	NaN
NaN	NaN	0.27829	NaN	NaN	NaN	NaN	NaN	NaN	NaN	NaN	NaN	NaN	NaN	NaN	NaN	NaN	NaN	1.0263	NaN	0.69979	0.48963	NaN	NaN	NaN	NaN	NaN	0.56134	NaN	NaN	NaN	NaN	NaN	NaN	NaN	NaN	NaN	NaN	NaN	NaN	NaN	NaN	NaN	NaN	NaN	NaN	NaN	NaN	NaN	NaN
1.0349	1.2353	0.94475	0.87166	0.7598	1.0339	0.75822	0.94247	0.83681	0.59793	0.59523	0.46537	0.34317	0.81307	0.14396	0.0569	NaN	NaN	1.3077	3.1083	2.1199	NaN	NaN	1.1781	1.9832	1.5778	2.2403	2.7654	NaN	1.74	1.1146	0.99797	0.88468	0.38699	0.2503	0.2252	1.064	1.8938	0.92513	1.3026	1.4085	1.2055	1.1783	1.2805	1.0829	0.85139	0.53639	0.66614	0.54252	0.52877
NaN	NaN	NaN	NaN	NaN	NaN	NaN	NaN	NaN	NaN	NaN	NaN	NaN	NaN	NaN	NaN	NaN	NaN	NaN	NaN	NaN	NaN	NaN	NaN	NaN	NaN	NaN	NaN	NaN	NaN	NaN	NaN	NaN	NaN	NaN	NaN	NaN	NaN	1.0953	NaN	NaN	NaN	NaN	NaN	NaN	NaN	NaN	NaN	NaN	NaN
NaN	NaN	NaN	NaN	NaN	NaN	NaN	NaN	NaN	NaN	NaN	NaN	NaN	NaN	NaN	NaN	NaN	NaN	1.0001	0.68802	0.55754	0.51694	NaN	NaN	0.19173	NaN	NaN	NaN	0.17321	NaN	NaN	NaN	NaN	NaN	NaN	NaN	NaN	NaN	NaN	NaN	NaN	NaN	NaN	NaN	NaN	NaN	NaN	NaN	NaN	NaN
NaN	NaN	NaN	NaN	NaN	NaN	NaN	NaN	NaN	NaN	NaN	NaN	NaN	NaN	NaN	NaN	NaN	NaN	1.2349	NaN	NaN	NaN	NaN	NaN	NaN	NaN	NaN	NaN	NaN	NaN	NaN	NaN	NaN	NaN	NaN	NaN	NaN	NaN	NaN	NaN	NaN	NaN	NaN	NaN	NaN	NaN	NaN	NaN	NaN	NaN
1.0349	1.2353	0.94475	0.87166	0.90283	1.2089	0.75822	0.94247	0.83681	0.59793	0.63753	0.46537	0.34317	0.29691	0.14396	0.0569	0.10403	NaN	1.3077	3.1083	1.6505	NaN	NaN	2.4035	1.9832	1.5778	2.2403	2.7654	2.4553	1.74	1.1146	0.87943	0.88468	0.38699	0.2503	0.21839	1.064	1.8938	1.0066	1.3026	0.85734	1.2055	1.1783	1.2805	0.95816	1.0835	0.53639	0.66614	0.54252	0.43278
NaN	NaN	NaN	NaN	NaN	NaN	NaN	NaN	NaN	NaN	NaN	NaN	NaN	NaN	NaN	NaN	NaN	NaN	NaN	NaN	NaN	NaN	NaN	NaN	NaN	NaN	NaN	NaN	NaN	NaN	NaN	NaN	NaN	NaN	NaN	NaN	NaN	NaN	NaN	NaN	NaN	NaN	NaN	NaN	NaN	NaN	NaN	NaN	NaN	NaN
NaN	NaN	NaN	NaN	NaN	NaN	NaN	NaN	NaN	NaN	NaN	NaN	NaN	NaN	NaN	NaN	NaN	NaN	NaN	NaN	NaN	NaN	NaN	NaN	NaN	NaN	NaN	NaN	NaN	NaN	NaN	NaN	NaN	NaN	NaN	NaN	NaN	NaN	NaN	NaN	NaN	NaN	NaN	NaN	NaN	NaN	NaN	NaN	NaN	NaN
NaN	NaN	NaN	NaN	NaN	NaN	NaN	NaN	NaN	NaN	NaN	NaN	NaN	NaN	NaN	NaN	NaN	NaN	0.94623	NaN	NaN	NaN	NaN	NaN	NaN	NaN	NaN	NaN	NaN	NaN	NaN	NaN	NaN	NaN	NaN	NaN	NaN	NaN	NaN	NaN	NaN	NaN	NaN	NaN	NaN	NaN	NaN	NaN	NaN	NaN
1.0643	0.74905	0.32943	0.365	0.25526	NaN	0.14897	0.098758	0.067345	0.079311	NaN	NaN	NaN	NaN	NaN	NaN	NaN	0.073559	1.2612	1.195	0.74477	0.59172	0.5592	0.3853	0.32061	0.35089	0.22814	NaN	0.18405	0.15937	0.10564	NaN	0.10056	NaN	0.086819	NaN	1.1189	0.79333	0.53955	0.44615	0.26681	0.23173	0.15546	0.15017	0.12794	0.079896	0.21481	0.12975	NaN	NaN
0.75352	1.7324	0.82633	1.2289	1.1948	0.94845	1.0901	1.2933	1.6055	1.2268	1.0548	1.4105	1.2982	1.3213	1.2873	0.74054	1.2098	1.1613	0.98841	2.5872	1.0772	NaN	NaN	1.5393	1.4738	1.912	1.9004	NaN	NaN	NaN	2.0751	2.2122	NaN	2.5328	2.2912	2.6043	0.51202	NaN	1.3708	NaN	1.8	1.9077	1.3204	2.0241	1.3948	1.6643	NaN	1.9273	2.0474	2.6276
NaN	NaN	NaN	NaN	NaN	NaN	NaN	NaN	NaN	NaN	NaN	NaN	NaN	NaN	NaN	NaN	NaN	NaN	NaN	NaN	NaN	NaN	NaN	NaN	NaN	NaN	NaN	NaN	NaN	NaN	NaN	NaN	NaN	NaN	NaN	NaN	NaN	NaN	NaN	NaN	NaN	NaN	NaN	NaN	NaN	NaN	NaN	NaN	NaN	NaN
1.2444	0.80843	0.94682	0.6118	0.89853	0.89548	0.84255	0.69377	NaN	0.55817	0.73399	NaN	0.83451	0.74533	0.99458	0.6645	1.0843	0.69155	1.3881	0.98315	1.8428	1.5582	NaN	NaN	1.6629	0.96129	1.272	1.1801	1.9744	NaN	1.4144	1.3422	1.3031	1.6074	2.3638	1.1061	1.042	0.96444	1.1701	0.95183	0.79899	0.93426	1.1661	1.1565	1.0524	0.96891	1.0033	0.72442	1.0601	1.4358
NaN	NaN	NaN	NaN	NaN	NaN	NaN	NaN	NaN	NaN	NaN	NaN	NaN	NaN	4.008	2.9489	4.3785	NaN	NaN	NaN	NaN	1.6408	NaN	1.2668	0.98374	1.5581	NaN	NaN	2.0083	1.8126	NaN	1.5441	3.4521	1.5538	1.8061	2.2709	NaN	NaN	3.6839	NaN	NaN	NaN	NaN	NaN	NaN	NaN	NaN	NaN	NaN	1.9996
0.99557	0.78003	0.83422	NaN	0.90935	0.64569	NaN	NaN	NaN	NaN	NaN	1.0754	NaN	NaN	0.56095	NaN	NaN	NaN	1.5624	NaN	1.4322	1.4229	NaN	NaN	1.1865	0.75432	NaN	NaN	1.3487	1.6101	NaN	NaN	NaN	1.2792	1.0288	NaN	NaN	NaN	NaN	NaN	NaN	NaN	NaN	NaN	NaN	NaN	NaN	NaN	4.0416	NaN
1.2523	1.2861	0.93663	0.68223	NaN	0.97605	0.90778	0.79742	0.63679	0.91217	0.86151	1.101	1.1216	1.0572	1	0.88667	1.1939	0.45781	1.9552	1.2709	1.6138	1.0916	1.454	1.5724	NaN	1.1156	1.273	1.5775	1.233	1.4252	1.4992	NaN	1.3514	1.4616	1.5341	1.2729	1.0691	1.2967	1.1613	0.9007	0.96492	1.357	0.94793	0.98764	0.86464	0.71608	1.4109	1.0858	1.2274	1.316
0.99612	1.0265	1.1424	1.0327	0.95567	0.86152	0.97194	0.78993	0.85666	0.97686	1.4524	1.1552	0.82943	0.90714	0.88612	0.8343	0.67604	0.45656	1.3978	1.5244	1.7762	1.9644	2.3782	1.4842	2.05	1.8042	1.6775	1.9709	1.8757	2.1212	1.7415	1.8868	1.2855	1.7242	2.1952	1.7936	0.74963	1.451	0.84526	1.135	1.0219	1.0631	1.1912	1.2337	1.1528	0.95396	1.4072	1.141	1.4928	1.6673
0.81926	0.92073	1.1424	0.60096	0.95567	0.73357	0.6809	0.78993	0.5552	0.97686	1.4524	1.0972	0.82943	0.6135	0.61532	1.0264	1.1641	0.45656	1.3978	0.85291	1.3382	1.9644	1.4424	1.4842	2.05	1.3851	1.2667	1.9709	1.28	1.4782	1.6297	1.8868	0.74958	1.1596	1.5686	1.0235	1.2212	1.0487	1.2265	0.86739	1.0219	1.0631	1.1912	1.1625	3.4929	0.85913	1.1773	0.967	1.1095	1.4835
1.0882	1.7745	1.4079	1.111	1.505	0.75104	1.3084	1.3752	1.0796	1.25	1.2665	1.4647	0.82496	1.3163	1.3165	0.97759	1.951	0.72842	1.3336	2.1804	2.2407	2.2521	2.2957	NaN	2.2956	2.4408	2.1861	2.5326	2.4777	2.9838	2.5827	2.4664	2.2193	2.761	2.558	2.0885	1.0448	1.6155	1.2779	1.5501	1.6223	1.6392	1.4231	1.1814	1.2492	1.187	1.7437	1.9036	1.7305	1.7582
0.92995	1.1047	NaN	0.82425	NaN	1.503	NaN	NaN	NaN	1.25	NaN	NaN	1.3744	1.4043	1.3304	NaN	NaN	NaN	NaN	NaN	NaN	NaN	2.2957	NaN	NaN	2.4408	NaN	NaN	NaN	NaN	NaN	2.4664	NaN	NaN	NaN	2.0885	NaN	1.6823	NaN	1.4428	NaN	1.6392	NaN	NaN	NaN	NaN	NaN	NaN	NaN	NaN
NaN	NaN	NaN	NaN	NaN	NaN	NaN	NaN	NaN	NaN	NaN	NaN	NaN	1.0447	1.1385	NaN	NaN	0.64926	NaN	1.9556	NaN	NaN	NaN	NaN	NaN	NaN	NaN	NaN	NaN	NaN	NaN	2.1376	1.9671	NaN	NaN	1.877	NaN	1.1701	NaN	NaN	NaN	NaN	NaN	NaN	NaN	NaN	NaN	NaN	NaN	1.6051
0.96369	1.422	0.99444	0.64607	1.4968	1.2813	1.0882	1.2106	1.0887	0.98455	1.2571	0.54108	0.86426	1.1377	0.91495	1.1219	2.0067	0.35057	1.1894	1.0454	1.9698	2.5411	1.4863	1.3116	2.538	1.9988	2.0791	3.0671	2.1843	3.5529	2.1614	1.6051	1.8976	2.4843	2.46	1.839	0.98087	1.1939	1.1267	1.3931	0.89405	1.5069	1.3252	0.5216	1.424	1.383	1.3708	1.3426	1.8548	1.7431
1.1557	1.8223	1.6212	1.1233	1.3098	1.8545	1.5366	1.4853	1.4941	1.5637	1.3226	1.8552	1.4875	1.66	1.9986	1.6268	2.8295	1.0014	1.4793	4.2304	3.4479	3.9903	2.8699	3.8884	3.3988	2.7404	3.0133	3.6762	3.4788	5.2671	3.1962	3.4826	2.9787	3.7081	4.0177	3.4376	0.93215	2.4979	1.6927	2.5724	2.3624	2.2779	2.5946	1.9658	1.8571	1.549	2.112	2.6656	2.6551	2.7973
0.9736	NaN	0.93588	1.0238	NaN	0.8511	1.2559	1.525	0.73464	0.66174	0.98805	0.94339	0.94529	1.1248	0.92047	0.72235	1.9223	0.85513	NaN	NaN	NaN	NaN	NaN	NaN	NaN	NaN	NaN	NaN	NaN	NaN	NaN	NaN	NaN	NaN	NaN	NaN	0.94624	NaN	1.0792	1.2841	0.83689	NaN	NaN	NaN	1.2303	NaN	1.7918	0.98186	NaN	1.1294
1.0183	1.0322	0.7553	1.086	0.51373	0.74924	0.77575	0.79323	1.0808	0.78583	0.56365	0.55151	0.64701	0.79953	0.72126	0.27315	0.55696	0.19156	1.2953	2.8186	0.72488	1.0483	1.5598	2.3661	1.2797	1.5759	1.4794	1.67	1.5287	2.2815	1.071	1.9062	1.777	1.5837	0.95047	0.70605	1.0208	1.1656	1.1055	1.1757	0.5679	1.2434	1.1173	1.7478	1.25	1.0088	1.5314	1.6231	1.2532	1.4131
NaN	NaN	NaN	NaN	NaN	NaN	NaN	NaN	NaN	0.76371	NaN	NaN	NaN	NaN	NaN	0.36977	NaN	NaN	1.3558	NaN	NaN	NaN	NaN	NaN	NaN	NaN	NaN	NaN	1.5603	NaN	NaN	2.67	2.2597	NaN	1.4759	1.5559	0.92896	NaN	NaN	1.1044	NaN	NaN	NaN	NaN	1.4297	1.5046	NaN	NaN	NaN	NaN
0.91292	0.92697	0.77132	0.53372	0.56169	0.43999	0.29039	0.27435	0.19016	0.1422	0.14456	0.087188	0.053223	0.06889	0.077883	0.085265	0.16119	0.095019	1.0228	1.293	1.2081	1.0585	1.2838	0.95458	0.91676	0.89709	0.62133	0.61418	0.62183	0.24191	0.12272	0.10989	0.098479	0.13557	0.1727	0.32702	0.82609	1.0843	0.86664	0.72321	0.56293	0.53765	0.39577	0.30982	0.18617	0.16591	0.17559	0.13761	0.10755	0.13265
NaN	NaN	NaN	NaN	NaN	NaN	NaN	NaN	NaN	NaN	NaN	NaN	NaN	NaN	NaN	NaN	NaN	NaN	NaN	NaN	NaN	NaN	NaN	NaN	NaN	NaN	NaN	NaN	NaN	NaN	NaN	NaN	NaN	NaN	NaN	NaN	NaN	NaN	NaN	NaN	NaN	NaN	NaN	NaN	NaN	NaN	NaN	NaN	NaN	NaN
0.99925	NaN	NaN	NaN	NaN	0.28624	NaN	0.24792	0.59263	NaN	NaN	NaN	NaN	NaN	NaN	NaN	NaN	NaN	NaN	3.7402	NaN	NaN	NaN	NaN	NaN	NaN	NaN	NaN	NaN	NaN	NaN	NaN	NaN	NaN	NaN	NaN	NaN	0.85813	NaN	0.53174	NaN	NaN	0.48364	0.6772	0.50649	0.34185	0.48755	NaN	NaN	NaN
NaN	NaN	NaN	NaN	NaN	NaN	NaN	NaN	NaN	NaN	NaN	NaN	NaN	NaN	0.08031	NaN	NaN	NaN	NaN	NaN	NaN	NaN	NaN	NaN	NaN	NaN	NaN	NaN	NaN	NaN	NaN	NaN	NaN	NaN	NaN	NaN	NaN	NaN	NaN	NaN	NaN	NaN	NaN	NaN	NaN	NaN	NaN	NaN	NaN	NaN
NaN	NaN	NaN	NaN	NaN	NaN	NaN	NaN	NaN	NaN	NaN	NaN	NaN	NaN	NaN	NaN	NaN	NaN	NaN	NaN	NaN	NaN	NaN	NaN	NaN	NaN	NaN	NaN	NaN	NaN	NaN	NaN	NaN	NaN	NaN	NaN	NaN	NaN	NaN	NaN	NaN	NaN	NaN	NaN	NaN	NaN	NaN	NaN	NaN	NaN
NaN	NaN	NaN	NaN	NaN	NaN	NaN	NaN	NaN	NaN	NaN	NaN	NaN	NaN	NaN	NaN	NaN	NaN	NaN	NaN	NaN	NaN	NaN	NaN	NaN	NaN	NaN	NaN	NaN	NaN	NaN	NaN	NaN	NaN	NaN	NaN	NaN	NaN	NaN	NaN	NaN	NaN	NaN	NaN	NaN	NaN	NaN	NaN	NaN	NaN
0.9141	1.4606	0.79629	1.0692	NaN	1.2913	1.3426	1.5092	NaN	NaN	1.073	1.188	1.2564	1.1599	1.3849	0.89214	1.6878	1.1038	2.2986	NaN	1.4747	1.9495	NaN	1.1831	2.1966	1.7361	2.5893	2.1821	1.5119	1.7583	2.6791	1.7032	2.2749	1.6235	1.7591	1.8475	1.0332	1.8747	1.6684	1.5324	NaN	1.5585	NaN	1.5763	1.6661	1.8597	1.6963	1.5861	2.2618	2.0123
NaN	NaN	NaN	NaN	NaN	NaN	NaN	NaN	NaN	NaN	NaN	NaN	NaN	NaN	NaN	NaN	NaN	NaN	NaN	NaN	NaN	NaN	NaN	NaN	NaN	NaN	NaN	NaN	NaN	NaN	NaN	NaN	NaN	NaN	NaN	NaN	NaN	NaN	NaN	NaN	NaN	NaN	NaN	NaN	NaN	NaN	NaN	NaN	NaN	NaN
NaN	NaN	NaN	NaN	NaN	NaN	NaN	NaN	NaN	NaN	NaN	NaN	NaN	NaN	NaN	NaN	NaN	NaN	NaN	NaN	NaN	NaN	NaN	1.7695	1.8852	NaN	1.5037	NaN	NaN	NaN	2.2115	NaN	NaN	NaN	NaN	NaN	NaN	NaN	NaN	NaN	NaN	NaN	NaN	NaN	NaN	NaN	NaN	NaN	NaN	NaN
1.1208	1.0365	0.77689	1.0921	0.96041	1.0726	1.0362	1.2396	1.1683	1.1558	0.80184	1.0291	1.0385	1.2249	0.63152	0.56948	0.92983	0.73775	NaN	2.1454	1.0884	0.66349	NaN	2.2732	2.9952	2.2253	1.9019	2.3916	1.5909	1.6191	2.3862	2.4221	1.5449	1.443	0.81719	1.7148	1.0864	NaN	0.76941	1.2196	1.3805	1.7915	NaN	NaN	1.8129	2.0711	1.5798	1.6047	1.8752	1.6215
1.1208	1.0365	0.77689	1.0921	0.96041	1.0726	1.0362	1.2396	1.1683	1.1558	0.80184	1.0291	1.0385	1.2249	0.63152	0.56948	0.92983	0.73775	NaN	2.1454	1.0884	0.66349	NaN	2.2732	2.9952	2.2253	1.9019	2.3916	1.5909	1.6191	2.3862	2.4221	1.5449	1.443	0.81719	1.7148	1.0864	NaN	0.76941	1.2196	1.3805	1.7915	NaN	NaN	1.8129	2.0711	1.5798	1.6047	1.8752	1.6215
1.0789	1.0639	0.96759	0.7368	0.85395	1.0805	0.83148	2.2595	0.76311	0.86313	0.93349	1.1836	1.0241	0.87036	0.9805	0.88373	1.3455	0.6377	1.266	1.6099	0.73836	0.92696	NaN	1.8432	1.8	2.0748	NaN	1.8367	1.512	NaN	NaN	2.3552	1.5411	NaN	1.2939	NaN	NaN	1.3105	0.70355	0.86988	0.94961	1.1959	0.99211	1.111	NaN	1.4026	1.6122	1.1191	1.7749	1.5301
0.90772	0.97592	0.72975	1.2565	0.75224	0.76152	0.74013	0.71393	0.87259	0.84317	0.59643	0.59553	0.82101	0.98531	0.81001	0.56412	0.92066	0.42483	1.2029	1.9356	0.92321	1.0003	1.8392	2.0714	1.1477	1.2423	1.3067	1.6229	1.453	1.9873	1.3525	2.2773	2.1274	2.0644	1.3419	1.3849	0.97678	1.2355	0.95007	0.96578	0.63077	1.0955	1.0927	1.5167	1.051	0.87958	1.8963	1.8736	1.1563	1.4925
1.0789	NaN	0.67518	NaN	NaN	1.0163	0.83148	0.96721	NaN	0.93197	0.93349	NaN	1.0241	1.0363	0.86133	NaN	NaN	NaN	1.266	1.6099	NaN	0.72145	NaN	1.8432	1.9423	2.0748	1.8757	1.8367	1.512	NaN	NaN	2.3552	1.6931	NaN	NaN	NaN	NaN	1.3105	NaN	1.0825	1.1746	1.3419	0.99211	NaN	1.0173	1.165	1.0021	1.2587	1.3123	1.3914
NaN	NaN	NaN	NaN	NaN	NaN	NaN	NaN	NaN	NaN	NaN	NaN	NaN	NaN	NaN	NaN	NaN	NaN	NaN	NaN	NaN	NaN	NaN	NaN	NaN	NaN	NaN	NaN	NaN	NaN	NaN	NaN	NaN	NaN	NaN	NaN	NaN	NaN	NaN	NaN	NaN	NaN	NaN	NaN	NaN	NaN	NaN	NaN	NaN	NaN
NaN	NaN	NaN	NaN	NaN	NaN	NaN	NaN	NaN	NaN	NaN	NaN	NaN	NaN	NaN	NaN	NaN	NaN	NaN	NaN	NaN	NaN	NaN	NaN	NaN	NaN	NaN	NaN	NaN	NaN	NaN	NaN	NaN	NaN	NaN	NaN	NaN	NaN	1.1237	NaN	NaN	NaN	NaN	NaN	NaN	NaN	NaN	NaN	NaN	NaN
NaN	NaN	NaN	NaN	NaN	NaN	NaN	NaN	NaN	NaN	NaN	NaN	NaN	NaN	NaN	NaN	NaN	NaN	NaN	NaN	NaN	NaN	NaN	NaN	NaN	NaN	NaN	NaN	NaN	NaN	NaN	NaN	NaN	NaN	NaN	NaN	NaN	NaN	NaN	NaN	NaN	NaN	NaN	NaN	NaN	NaN	NaN	NaN	NaN	NaN
0.87833	1.2977	2.0629	0.92567	0.94943	1.1878	0.89219	1.028	1.2408	0.81672	1.4886	0.83515	1.1579	2.0009	1.6735	0.86016	1.5522	0.99357	1.3657	NaN	1.0169	0.86364	NaN	2.1292	2.5252	2.302	2.1207	2.0284	1.3899	2.4881	3.1675	NaN	2.5976	NaN	NaN	2.6057	0.9689	NaN	0.61229	0.88356	1.5419	1.3619	1.2343	1.1267	NaN	1.4919	1.4519	1.8083	1.7011	2.1843
0.87833	1.2977	0.66257	0.92567	0.94943	NaN	0.89219	NaN	1.0793	0.81672	0.92234	1.3065	1.1579	1.1642	1.0218	0.86016	1.5522	0.99357	1.3657	NaN	1.0169	0.86364	NaN	2.1292	2.5252	2.302	2.1207	2.0284	1.3899	2.4881	2.4462	NaN	2.5976	NaN	NaN	2.6057	0.9689	NaN	0.61229	0.88356	1.5419	NaN	0.93826	1.1267	NaN	1.1231	1.4519	1.8083	1.7011	1.7297
NaN	NaN	NaN	NaN	NaN	NaN	NaN	1.028	NaN	NaN	NaN	NaN	NaN	NaN	NaN	NaN	NaN	NaN	NaN	NaN	NaN	NaN	NaN	NaN	NaN	NaN	NaN	NaN	NaN	NaN	NaN	3.1686	NaN	NaN	NaN	NaN	NaN	NaN	NaN	NaN	NaN	1.3619	NaN	NaN	NaN	NaN	NaN	NaN	NaN	NaN
NaN	NaN	NaN	NaN	NaN	NaN	NaN	NaN	NaN	NaN	NaN	NaN	NaN	NaN	NaN	NaN	NaN	NaN	1.5553	2.7303	0.98234	1.0802	2.5742	2.4188	1.621	1.5898	2.0061	2.0051	NaN	NaN	1.9599	NaN	2.3203	2.3572	NaN	NaN	NaN	NaN	NaN	NaN	NaN	NaN	NaN	NaN	NaN	NaN	NaN	NaN	NaN	NaN
NaN	NaN	0.6583	NaN	NaN	NaN	NaN	NaN	NaN	NaN	NaN	NaN	NaN	NaN	NaN	NaN	NaN	0.48662	NaN	NaN	NaN	NaN	NaN	NaN	NaN	NaN	NaN	NaN	NaN	NaN	NaN	NaN	NaN	NaN	NaN	NaN	NaN	NaN	NaN	NaN	NaN	NaN	NaN	NaN	NaN	NaN	NaN	NaN	NaN	1.3868
1.0025	NaN	NaN	1.028	1.0493	0.99341	0.84716	1.1162	0.86762	0.94035	1.0499	0.94196	0.97599	NaN	1.1876	NaN	1.0072	NaN	1.1769	NaN	0.92821	1.8898	NaN	2.1294	1.6868	1.5979	NaN	NaN	1.8668	1.0671	NaN	1.9204	1.7209	1.9745	2.146	1.5651	0.82243	NaN	0.85503	0.91082	0.93162	0.96183	1.092	1.0318	0.86844	0.92704	1.4175	NaN	1.2071	NaN
0.45395	0.74932	1.0401	0.47446	1.1363	0.82695	0.62038	0.83606	0.62018	0.82195	0.81059	0.81759	0.75996	0.90136	0.76927	0.84718	1.0183	0.74829	1.1291	1.1595	1.1547	1.2634	NaN	1.0414	1.4349	1.3542	1.2277	1.3712	1.7378	1.3991	1.5024	1.3872	1.1969	1.6014	1.8554	1.2281	0.88553	1.4323	0.97663	0.78507	0.75791	0.73582	NaN	1.0673	1.6068	0.96235	NaN	1.2495	0.96625	1.0537
NaN	NaN	NaN	NaN	NaN	NaN	NaN	NaN	NaN	NaN	NaN	NaN	NaN	NaN	NaN	NaN	NaN	NaN	NaN	NaN	NaN	NaN	NaN	NaN	NaN	1.7685	NaN	NaN	NaN	NaN	NaN	NaN	NaN	NaN	NaN	NaN	1.2937	NaN	NaN	NaN	NaN	NaN	NaN	NaN	NaN	NaN	NaN	NaN	NaN	NaN
NaN	NaN	NaN	NaN	NaN	NaN	NaN	NaN	NaN	NaN	NaN	NaN	NaN	NaN	NaN	NaN	NaN	NaN	1.5444	3.0847	1.4027	NaN	2.6897	1.6221	1.705	1.3855	1.6189	2.0495	1.6913	1.716	1.0877	1.4362	1.2629	0.75263	0.55987	NaN	NaN	NaN	NaN	NaN	NaN	NaN	NaN	NaN	NaN	NaN	NaN	NaN	NaN	NaN
NaN	NaN	NaN	NaN	NaN	1.008	NaN	0.71898	NaN	NaN	NaN	NaN	NaN	NaN	NaN	NaN	NaN	NaN	NaN	1.1136	NaN	NaN	NaN	NaN	NaN	NaN	1.5403	NaN	NaN	NaN	NaN	NaN	NaN	NaN	NaN	NaN	NaN	NaN	NaN	1.1704	NaN	NaN	1.1802	NaN	NaN	NaN	NaN	NaN	NaN	NaN
1.143	1.6794	1.1041	0.95541	1.4019	1.008	0.75562	1.4255	0.76788	1.0667	1.2582	1.0207	1.9655	NaN	1.6902	1.5564	3.1129	1.2498	1.93	0.98282	1.8229	1.6241	2.7917	1.2624	1.5997	3.1186	1.5791	2.0116	2.2062	1.716	2.9227	1.4362	2.3048	2.803	5.1939	3.341	1.136	1.825	NaN	1.051	1.8975	1.3035	0.9848	0.72218	0.89458	0.65312	2.2564	0.81278	1.5788	1.9125
NaN	NaN	NaN	NaN	1.3197	NaN	NaN	NaN	NaN	1.0872	1.1976	1.2178	NaN	1.3325	NaN	0.91874	NaN	NaN	1.3298	NaN	1.3968	NaN	NaN	NaN	NaN	NaN	1.9269	NaN	2.0646	NaN	NaN	2.2142	NaN	NaN	2.9822	NaN	NaN	NaN	1.2314	1.2883	NaN	1.3942	NaN	1.7838	1.8237	1.8252	NaN	1.339	NaN	NaN
0.93384	1.5403	1.1106	NaN	NaN	NaN	0.71808	0.8375	NaN	0.77139	NaN	1.4088	1.237	1.1993	0.98597	NaN	1.5781	0.86449	NaN	NaN	NaN	NaN	NaN	2.322	1.7022	2.4202	0.852	NaN	2.0411	2.186	2.8067	1.8721	2.5572	NaN	NaN	2.1852	NaN	1.3624	NaN	NaN	NaN	NaN	1.6678	NaN	NaN	1.8813	1.5304	1.2775	NaN	NaN
0.94914	0.76055	0.7225	0.82325	0.45481	0.67151	0.42241	0.65773	0.86863	0.32599	0.36199	NaN	0.27248	0.28759	NaN	NaN	NaN	NaN	1.3858	2.628	1.212	1.7928	NaN	2.2338	1.7083	1.0879	2.2413	1.9904	1.7629	1.5081	1.0504	1.1238	0.80248	0.35704	0.46964	NaN	0.93018	1.0881	0.98161	1.0778	0.43274	0.9871	0.95581	1.5553	1.206	0.92905	NaN	0.51029	0.60775	0.50956
0.58832	NaN	0.67323	NaN	NaN	NaN	NaN	NaN	NaN	NaN	NaN	NaN	NaN	NaN	NaN	NaN	NaN	NaN	NaN	NaN	NaN	NaN	NaN	0.77327	1.5145	NaN	3.4217	0.98116	NaN	1.3307	NaN	NaN	NaN	NaN	NaN	NaN	0.68521	NaN	1.463	0.7035	1.6942	0.9545	NaN	NaN	NaN	NaN	NaN	NaN	NaN	NaN
0.89231	0.93364	0.76063	0.58373	0.99098	1.2306	0.92523	1.0301	0.63261	0.8363	0.88468	1.1027	0.72657	0.63858	0.61643	0.23083	0.47708	0.25702	0.86772	0.52234	2.0128	2.4027	NaN	1.3485	1.5932	1.4207	1.6992	0.78849	1.5293	1.189	1.0874	NaN	0.60199	0.46824	1.2728	0.50774	0.80602	NaN	1.1955	NaN	1.2874	0.80436	1.2553	0.65248	1.2452	1.1722	0.97022	0.69446	0.81044	0.8256
1.0589	NaN	NaN	0.61783	NaN	NaN	0.58223	0.42064	0.34247	0.3958	0.5029	0.48215	0.38744	NaN	NaN	0.23083	NaN	NaN	1.069	NaN	NaN	0.41028	NaN	0.81994	1.3138	1.0432	0.47023	0.78849	1.5293	0.67722	0.82742	NaN	NaN	NaN	NaN	NaN	NaN	NaN	NaN	NaN	NaN	NaN	NaN	NaN	NaN	NaN	NaN	NaN	NaN	NaN
0.95445	1.0353	1.1381	0.88688	1.1836	1.0371	0.98315	1.1049	0.73859	0.84725	0.85529	0.99556	0.99373	0.91116	1.0151	0.84749	1.1015	0.90409	1.0891	1.6511	1.6568	1.613	1.3946	1.5058	1.9428	1.8713	1.7394	1.9807	2.2242	1.6084	2.1852	1.6712	1.9343	1.8672	1.5685	1.4728	1.0028	1.1622	1.2169	1.0356	1.0655	0.91077	1.1303	1.4661	1.2129	1.2341	1.0473	1.2889	1.6107	1.3454
0.83879	0.75402	0.57289	0.48033	0.63066	0.67482	NaN	0.74311	0.59412	0.46848	0.60554	0.53768	0.68688	0.78108	0.45953	0.4879	0.87387	0.5402	0.94743	0.9987	0.83741	0.73764	NaN	1.3788	0.91652	1.0732	1.3456	1.0769	1.0178	0.94366	1.2826	1.3178	1.3241	1.1735	0.9953	0.97629	0.78675	NaN	NaN	0.69492	0.45293	0.55736	0.51077	1.0886	0.96555	1.2639	0.73764	0.70839	0.78171	0.61862
NaN	NaN	NaN	3.3884	NaN	NaN	NaN	NaN	4.6788	1.0847	NaN	NaN	NaN	1.0169	NaN	NaN	NaN	NaN	NaN	NaN	NaN	NaN	NaN	NaN	NaN	NaN	NaN	NaN	NaN	NaN	NaN	NaN	NaN	NaN	NaN	NaN	NaN	NaN	NaN	NaN	NaN	NaN	NaN	NaN	NaN	NaN	NaN	NaN	NaN	NaN
NaN	NaN	NaN	3.3884	NaN	NaN	NaN	NaN	4.6788	1.0847	NaN	NaN	NaN	1.0169	NaN	NaN	NaN	NaN	NaN	NaN	NaN	NaN	NaN	NaN	NaN	NaN	NaN	NaN	NaN	NaN	NaN	NaN	NaN	NaN	NaN	NaN	NaN	NaN	NaN	NaN	NaN	NaN	NaN	NaN	NaN	NaN	NaN	NaN	NaN	NaN
0.60043	1.2471	1.1145	0.8761	0.52878	0.98781	0.97628	0.64653	NaN	0.49429	0.58703	NaN	1.1139	NaN	0.8522	0.60588	NaN	0.27702	1.3541	1.8428	1.5258	1.7045	NaN	1.6188	NaN	1.3336	1.8733	1.6101	1.9089	1.9919	1.8863	NaN	NaN	1.8575	1.628	1.19	0.80714	1.1988	0.97482	1.1912	0.86614	1.3558	NaN	NaN	1.0875	1.2373	1.7116	1.5029	1.6725	0.88436
0.69919	NaN	NaN	NaN	0.5695	0.67565	0.49315	NaN	NaN	0.50688	0.60925	NaN	0.63421	NaN	0.42926	0.25237	NaN	NaN	0.87434	NaN	NaN	1.3242	1.7929	1.0963	NaN	1.15	1.0277	1.0236	NaN	NaN	1.3876	NaN	NaN	NaN	NaN	NaN	NaN	NaN	NaN	NaN	NaN	NaN	NaN	NaN	NaN	NaN	NaN	NaN	NaN	NaN
NaN	NaN	NaN	NaN	NaN	NaN	NaN	NaN	NaN	NaN	NaN	NaN	NaN	NaN	NaN	NaN	NaN	NaN	NaN	NaN	NaN	NaN	NaN	NaN	NaN	NaN	NaN	NaN	NaN	NaN	NaN	NaN	NaN	NaN	NaN	NaN	NaN	NaN	NaN	NaN	NaN	NaN	NaN	NaN	NaN	NaN	NaN	NaN	NaN	NaN
NaN	NaN	NaN	NaN	NaN	NaN	NaN	NaN	NaN	NaN	NaN	NaN	NaN	NaN	NaN	NaN	NaN	NaN	1.1832	NaN	NaN	NaN	NaN	NaN	NaN	NaN	NaN	NaN	NaN	NaN	NaN	NaN	NaN	NaN	NaN	NaN	NaN	NaN	NaN	NaN	NaN	NaN	NaN	NaN	NaN	NaN	NaN	NaN	NaN	NaN
0.89231	0.93364	0.76063	0.58373	0.99098	1.2306	0.92523	1.0301	0.63261	0.8363	0.88468	1.1027	0.72657	0.63858	0.61643	0.23083	0.47708	0.25702	0.86772	0.52234	2.0128	2.4027	NaN	1.3485	1.5932	1.4207	1.6992	0.78849	1.5293	1.189	1.0874	NaN	0.60199	0.46824	1.2728	0.50774	0.80602	NaN	1.1955	NaN	1.2874	0.80436	1.2553	0.65248	1.2452	1.1722	0.97022	0.69446	0.81044	0.8256
1.0589	NaN	NaN	0.61783	NaN	NaN	0.58223	0.42064	0.34247	0.3958	0.5029	0.48215	0.38744	NaN	NaN	0.23083	NaN	NaN	1.069	NaN	NaN	0.41028	NaN	0.81994	1.3138	1.0432	0.47023	0.78849	1.5293	0.67722	0.82742	NaN	NaN	NaN	NaN	NaN	NaN	NaN	NaN	NaN	NaN	NaN	NaN	NaN	NaN	NaN	NaN	NaN	NaN	NaN
NaN	NaN	NaN	NaN	NaN	1.0679	NaN	NaN	NaN	NaN	NaN	NaN	NaN	NaN	NaN	NaN	NaN	0.45438	NaN	NaN	NaN	NaN	NaN	NaN	NaN	NaN	NaN	NaN	NaN	NaN	NaN	NaN	NaN	NaN	NaN	NaN	NaN	NaN	NaN	NaN	NaN	NaN	1.2726	NaN	NaN	1.0371	NaN	NaN	NaN	NaN
1.0882	1.0487	0.7893	1.4045	0.83073	1.0679	0.89521	1.1414	1.6802	0.83108	0.80169	0.79158	0.87879	1.1401	0.7809	0.38816	0.98748	0.45438	1.1304	NaN	0.82002	1.1017	NaN	2.4292	1.4311	1.4445	1.8747	1.8181	2.012	2.2873	1.473	2.2258	2.1589	1.9477	1.681	1.4358	0.99115	1.5072	1.2265	1.2146	0.98752	1.6274	1.2726	1.8367	1.4034	1.0371	2.8415	2.2634	1.8193	1.433
1.1482	NaN	0.724	NaN	0.71528	0.7644	0.66498	0.71186	0.57707	0.49411	0.63198	0.62842	NaN	0.48409	NaN	NaN	NaN	NaN	1.3607	NaN	1.1879	1.181	NaN	1.3061	1.2602	1.438	1.227	1.6024	1.2789	1.5882	1.1013	0.88111	0.88196	NaN	NaN	0.27284	NaN	NaN	NaN	NaN	NaN	NaN	NaN	NaN	NaN	NaN	NaN	0.81511	NaN	0.67949
NaN	1.1049	NaN	NaN	0.71528	NaN	NaN	NaN	NaN	NaN	NaN	NaN	NaN	NaN	NaN	NaN	NaN	NaN	NaN	NaN	1.1879	1.181	NaN	1.3061	NaN	1.438	1.227	1.6024	1.2789	1.5882	1.1013	NaN	0.88196	NaN	NaN	0.27284	NaN	NaN	NaN	0.64077	NaN	NaN	NaN	NaN	0.87201	NaN	NaN	0.81511	NaN	NaN
1.1482	1.1049	NaN	0.5971	NaN	0.7644	0.66498	0.71186	0.57707	0.49411	NaN	0.62842	NaN	0.48409	NaN	NaN	NaN	NaN	1.3607	NaN	NaN	NaN	NaN	NaN	1.2602	NaN	1.227	NaN	NaN	NaN	NaN	0.88111	NaN	NaN	NaN	NaN	NaN	NaN	NaN	NaN	NaN	NaN	NaN	NaN	NaN	NaN	0.9162	0.81511	NaN	NaN
0.87332	1.3694	0.81465	0.52862	0.80092	NaN	0.88213	0.65616	0.40176	0.53972	NaN	NaN	NaN	NaN	NaN	NaN	NaN	NaN	1.0866	1.0609	1.0605	1.5337	NaN	1.3077	1.3952	2.1075	1.3679	NaN	1.5495	0.93163	NaN	NaN	0.36419	NaN	NaN	NaN	NaN	NaN	0.68228	NaN	NaN	0.63363	NaN	NaN	NaN	NaN	NaN	NaN	NaN	NaN
0.77524	1.168	1.0548	0.8976	0.98539	1.7751	0.73442	1.1111	1.1399	0.51397	0.73549	0.94491	0.86091	0.62966	NaN	NaN	0.831	NaN	1.4223	NaN	1.093	1.2421	NaN	NaN	NaN	1.523	NaN	2.0305	NaN	2.2893	NaN	1.5682	1.0733	0.78596	0.84104	0.55379	NaN	NaN	NaN	NaN	NaN	NaN	NaN	NaN	NaN	NaN	NaN	NaN	NaN	NaN
NaN	NaN	NaN	NaN	NaN	NaN	NaN	NaN	0.84133	NaN	NaN	NaN	NaN	NaN	NaN	NaN	NaN	2.3146	NaN	NaN	NaN	NaN	NaN	NaN	NaN	NaN	NaN	NaN	NaN	NaN	NaN	NaN	NaN	NaN	NaN	NaN	NaN	NaN	NaN	NaN	NaN	NaN	NaN	NaN	NaN	NaN	NaN	NaN	NaN	NaN
1.004	1.0062	1.0538	NaN	0.88193	NaN	0.75006	1.0911	NaN	NaN	0.71648	0.84244	0.83613	NaN	NaN	NaN	NaN	NaN	1.0551	0.96755	NaN	0.8517	NaN	1.459	NaN	NaN	NaN	NaN	1.8314	NaN	NaN	1.1893	NaN	1.2821	NaN	NaN	1.1052	NaN	1.0359	0.88504	0.70852	NaN	0.95403	0.83245	0.83458	NaN	NaN	0.86321	NaN	NaN
NaN	NaN	NaN	NaN	NaN	NaN	NaN	NaN	NaN	NaN	NaN	NaN	NaN	NaN	NaN	NaN	NaN	NaN	NaN	NaN	NaN	NaN	NaN	NaN	NaN	NaN	NaN	NaN	NaN	NaN	NaN	NaN	NaN	NaN	NaN	NaN	NaN	NaN	NaN	NaN	NaN	NaN	NaN	NaN	NaN	NaN	NaN	NaN	NaN	NaN
NaN	NaN	NaN	NaN	NaN	NaN	NaN	NaN	NaN	NaN	NaN	NaN	NaN	NaN	NaN	NaN	NaN	NaN	NaN	NaN	NaN	NaN	NaN	NaN	NaN	NaN	NaN	NaN	NaN	NaN	NaN	NaN	NaN	NaN	NaN	NaN	NaN	NaN	NaN	NaN	NaN	NaN	NaN	NaN	NaN	NaN	NaN	NaN	NaN	NaN
NaN	NaN	NaN	NaN	NaN	NaN	NaN	NaN	NaN	NaN	NaN	NaN	NaN	NaN	NaN	NaN	NaN	NaN	NaN	NaN	NaN	NaN	NaN	NaN	NaN	NaN	NaN	NaN	NaN	NaN	NaN	NaN	NaN	NaN	NaN	NaN	NaN	NaN	NaN	NaN	NaN	NaN	NaN	NaN	NaN	NaN	NaN	NaN	NaN	NaN
NaN	NaN	NaN	NaN	NaN	NaN	NaN	NaN	NaN	NaN	NaN	NaN	NaN	NaN	NaN	NaN	NaN	NaN	NaN	1.1423	NaN	NaN	NaN	NaN	3.0339	4.0381	5.2297	3.4272	1.2818	2.0163	5.0224	2.5379	3.0253	3.2044	2.3917	NaN	NaN	NaN	NaN	NaN	NaN	NaN	NaN	NaN	NaN	NaN	NaN	NaN	NaN	NaN
NaN	NaN	NaN	NaN	NaN	NaN	NaN	NaN	NaN	NaN	NaN	NaN	NaN	NaN	NaN	NaN	NaN	NaN	NaN	1.1423	NaN	NaN	NaN	NaN	3.0339	4.0381	5.2297	3.4272	1.2818	2.0163	5.0224	2.5379	3.0253	3.2044	2.3917	NaN	NaN	NaN	NaN	NaN	NaN	NaN	NaN	NaN	NaN	NaN	NaN	NaN	NaN	NaN
NaN	NaN	NaN	NaN	NaN	NaN	NaN	NaN	NaN	NaN	NaN	NaN	NaN	NaN	NaN	NaN	NaN	NaN	NaN	NaN	NaN	NaN	NaN	NaN	NaN	NaN	NaN	NaN	NaN	NaN	NaN	NaN	NaN	NaN	NaN	NaN	NaN	NaN	NaN	NaN	NaN	NaN	NaN	NaN	NaN	NaN	NaN	NaN	NaN	NaN
NaN	NaN	NaN	NaN	NaN	NaN	NaN	NaN	NaN	NaN	NaN	NaN	NaN	NaN	NaN	NaN	NaN	NaN	1.2197	NaN	NaN	0.94666	NaN	0.9232	0.9977	0.88172	0.94223	0.82144	0.86546	NaN	NaN	NaN	NaN	NaN	NaN	NaN	NaN	NaN	NaN	NaN	NaN	NaN	NaN	NaN	NaN	NaN	NaN	NaN	NaN	NaN
NaN	1.4839	NaN	NaN	NaN	1.119	NaN	NaN	1.1578	0.87127	0.79329	NaN	NaN	NaN	NaN	NaN	NaN	NaN	NaN	NaN	NaN	NaN	NaN	NaN	NaN	NaN	NaN	NaN	NaN	NaN	NaN	NaN	NaN	NaN	NaN	NaN	NaN	NaN	NaN	NaN	NaN	NaN	NaN	NaN	NaN	NaN	NaN	NaN	NaN	NaN
NaN	1.7134	1.0824	1.1838	NaN	0.93987	1.3164	NaN	NaN	0.63604	NaN	NaN	NaN	NaN	NaN	NaN	NaN	NaN	NaN	NaN	NaN	NaN	NaN	NaN	NaN	NaN	NaN	NaN	NaN	NaN	NaN	NaN	NaN	NaN	NaN	NaN	NaN	NaN	NaN	NaN	NaN	NaN	NaN	NaN	NaN	NaN	NaN	NaN	NaN	NaN
1.0757	1.4726	0.96275	1.0012	0.94826	1.2425	1.1019	1.2125	1.1055	1.0141	1.0966	1.2623	1.0761	1.213	NaN	0.71367	1.3051	NaN	1.2952	2.1169	1.1865	1.401	NaN	2.3058	1.9795	2.189	2.4496	1.6457	1.3604	1.9839	2.2458	2.0055	1.7648	1.6302	1.3037	1.8384	0.86166	1.163	0.85164	0.9502	1.1308	0.89925	0.86929	NaN	0.84412	0.82445	1.4369	1.3371	1.3906	NaN
NaN	NaN	NaN	NaN	NaN	NaN	NaN	NaN	NaN	NaN	NaN	NaN	NaN	NaN	NaN	NaN	NaN	NaN	1.0079	2.0997	NaN	NaN	NaN	NaN	1.9612	2.227	NaN	2.5884	NaN	NaN	2.4492	NaN	2.0953	NaN	1.8478	2.3659	NaN	NaN	NaN	NaN	NaN	NaN	NaN	NaN	NaN	NaN	NaN	NaN	NaN	NaN
0.94104	1.2143	0.88113	1.1184	0.73564	1.3469	0.72293	1.0129	1.0446	0.88582	0.87951	NaN	0.88065	0.85408	NaN	NaN	NaN	NaN	1.5131	2.294	0.98692	0.79551	NaN	NaN	1.5299	1.8353	1.38	1.8148	1.4286	2.32	1.5669	2.4128	NaN	1.4859	1.2151	1.2269	0.99431	1.2806	0.8903	0.84084	0.94802	1.1013	0.94358	NaN	1.1055	NaN	1.1772	NaN	NaN	NaN
0.88196	NaN	1.3359	0.85787	0.62163	NaN	0.64945	0.93965	1.0574	NaN	1.246	1.2123	NaN	1.1934	0.67938	NaN	1.1663	0.62943	1.298	NaN	1.3342	1.0133	NaN	2.2305	1.8176	2.0135	2.0834	1.3761	1.1861	NaN	2.1092	NaN	2.1795	1.8629	1.2559	NaN	1.0019	NaN	0.57961	1.1717	0.78821	0.93735	1.1754	0.98501	1.2402	0.72111	0.98847	1.1536	1.5559	1.3973
NaN	NaN	NaN	NaN	NaN	NaN	NaN	NaN	NaN	NaN	NaN	NaN	NaN	NaN	NaN	NaN	NaN	NaN	NaN	NaN	NaN	NaN	NaN	NaN	NaN	NaN	NaN	NaN	NaN	NaN	NaN	NaN	NaN	NaN	NaN	NaN	NaN	NaN	NaN	NaN	NaN	NaN	2.3381	NaN	1.4145	NaN	1.3178	NaN	NaN	1.5445
NaN	NaN	NaN	NaN	NaN	NaN	NaN	NaN	NaN	NaN	NaN	NaN	NaN	NaN	NaN	NaN	NaN	NaN	NaN	NaN	1.0809	NaN	NaN	NaN	2.1702	NaN	NaN	NaN	NaN	NaN	NaN	NaN	NaN	NaN	NaN	NaN	NaN	NaN	NaN	NaN	NaN	NaN	NaN	NaN	NaN	NaN	NaN	NaN	NaN	NaN
1.1372	NaN	NaN	NaN	NaN	NaN	1.1157	1.3894	1.0728	0.91932	NaN	NaN	1.1017	1.3688	NaN	0.82195	1.4192	NaN	1.1915	1.6836	NaN	1.8858	NaN	2.1182	2.1878	1.6503	1.8228	2.1454	NaN	1.5218	NaN	1.6905	2.7141	1.8682	3.1676	1.3874	NaN	1.298	NaN	0.90492	NaN	NaN	NaN	NaN	NaN	NaN	NaN	1.1534	NaN	NaN
NaN	0.79042	NaN	0.67879	NaN	NaN	0.47101	NaN	NaN	NaN	NaN	0.26604	NaN	NaN	NaN	NaN	NaN	NaN	NaN	NaN	NaN	NaN	NaN	NaN	NaN	NaN	NaN	NaN	1.8697	NaN	NaN	NaN	NaN	NaN	NaN	NaN	NaN	NaN	NaN	NaN	0.81862	1.1361	NaN	NaN	NaN	NaN	NaN	1.084	NaN	NaN
1.0367	1.4372	1.0448	0.67217	1.0257	1.001	1.0047	1.1822	0.78093	0.85793	0.98985	0.97382	0.98113	1.0826	0.90303	0.69135	1.3963	0.67299	NaN	1.4403	1.4807	1.6338	2.171	1.8754	NaN	1.7079	1.7521	NaN	2.0961	1.9989	NaN	2.0356	2.07	2.117	1.9831	NaN	0.94078	1.3438	1.1492	1.2401	1.0748	NaN	1.2874	0.83961	1.3141	1.2023	1.2627	1.4056	1.6732	1.9909
0.97877	1.1536	0.62163	0.98955	NaN	0.77285	NaN	0.67043	0.99746	NaN	0.43858	NaN	NaN	0.39178	NaN	0.29527	0.54147	0.31878	NaN	NaN	NaN	NaN	NaN	NaN	NaN	0.73737	NaN	NaN	NaN	NaN	NaN	1.1151	1.4655	0.97739	0.84175	0.88847	1.3312	NaN	NaN	NaN	NaN	1.4118	0.99029	NaN	0.80463	0.86509	NaN	NaN	NaN	NaN
0.97877	1.1536	0.62163	0.98955	NaN	0.77285	NaN	0.67043	0.99746	NaN	0.43858	NaN	NaN	0.39178	NaN	0.29527	0.54147	0.27062	NaN	2.7389	NaN	NaN	NaN	2.1838	1.5864	0.73737	NaN	NaN	NaN	NaN	NaN	1.1151	1.4655	0.97739	0.84175	0.88847	1.3312	NaN	1.0574	NaN	NaN	1.4118	0.99029	0.94616	0.80463	0.86509	NaN	NaN	NaN	NaN
NaN	NaN	NaN	NaN	NaN	NaN	NaN	NaN	NaN	NaN	NaN	NaN	NaN	NaN	NaN	NaN	NaN	NaN	NaN	NaN	NaN	NaN	NaN	NaN	NaN	NaN	NaN	NaN	NaN	NaN	NaN	NaN	NaN	NaN	NaN	NaN	NaN	NaN	NaN	NaN	NaN	NaN	NaN	NaN	NaN	NaN	NaN	NaN	NaN	NaN
NaN	NaN	NaN	NaN	NaN	NaN	NaN	0.76682	1.5046	0.87329	1.2298	1.4332	1.225	1.1511	NaN	0.85986	1.2644	0.94064	NaN	NaN	NaN	NaN	NaN	NaN	NaN	2.4784	NaN	1.8817	NaN	2.0921	2.7934	2.912	1.888	NaN	1.391	1.7312	NaN	NaN	NaN	NaN	NaN	NaN	0.64673	NaN	0.91959	0.88781	NaN	1.9816	NaN	NaN
NaN	NaN	NaN	NaN	NaN	NaN	NaN	NaN	NaN	NaN	NaN	NaN	NaN	NaN	NaN	NaN	NaN	NaN	NaN	NaN	NaN	NaN	NaN	NaN	NaN	NaN	NaN	NaN	NaN	NaN	NaN	NaN	NaN	NaN	NaN	NaN	NaN	NaN	NaN	NaN	NaN	NaN	NaN	NaN	NaN	NaN	NaN	NaN	NaN	NaN
0.85957	0.91085	0.66764	0.61956	0.76347	0.69503	0.62023	0.73844	0.49153	0.52082	0.51063	0.38808	0.20658	0.15775	0.073944	0.050393	0.089361	NaN	0.97489	1.2211	1.2101	1.2084	1.6341	1.2112	1.1169	1.4612	1.2506	1.161	1.2529	1.0642	0.64501	0.36778	0.26346	0.16467	0.131	NaN	0.90768	1.182	0.84138	0.85934	0.76281	0.74817	0.73108	0.61735	0.59519	0.64619	0.66536	0.44327	0.27483	0.17977
NaN	NaN	NaN	NaN	NaN	NaN	NaN	NaN	NaN	NaN	NaN	NaN	NaN	NaN	NaN	NaN	NaN	NaN	NaN	NaN	NaN	NaN	NaN	NaN	NaN	NaN	NaN	NaN	NaN	NaN	NaN	NaN	NaN	NaN	NaN	NaN	NaN	NaN	NaN	NaN	NaN	NaN	NaN	NaN	NaN	NaN	NaN	NaN	NaN	NaN
NaN	NaN	1.2438	NaN	NaN	NaN	NaN	1.3542	NaN	NaN	NaN	NaN	NaN	NaN	NaN	NaN	NaN	NaN	1.1932	3.0426	1.434	1.3195	NaN	2.9267	NaN	2.7485	NaN	NaN	2.7755	1.6108	1.1843	NaN	NaN	NaN	NaN	NaN	NaN	NaN	NaN	NaN	1.4433	NaN	NaN	NaN	NaN	NaN	NaN	NaN	NaN	NaN
NaN	NaN	NaN	NaN	1.5009	NaN	NaN	NaN	NaN	NaN	NaN	NaN	NaN	NaN	NaN	NaN	NaN	NaN	NaN	NaN	NaN	NaN	NaN	NaN	NaN	NaN	NaN	NaN	NaN	NaN	NaN	NaN	NaN	NaN	NaN	NaN	NaN	NaN	NaN	NaN	NaN	NaN	NaN	NaN	NaN	NaN	NaN	NaN	NaN	NaN
0.91681	1.3717	0.70659	0.6808	1.3094	0.92028	0.91083	0.98276	0.69521	0.83747	1.108	0.92295	0.47054	0.28559	0.18825	0.12163	0.18222	0.14931	1.1578	1.4883	1.2833	0.7461	1.854	1.6873	2.0827	1.8954	2.038	1.9862	1.4579	1.4423	1.1627	0.73302	0.4607	0.31926	0.27151	0.26348	1.0104	1.4666	0.93582	0.95022	1.3007	1.1437	0.82284	0.79633	0.97858	0.97559	1.1957	0.64974	0.56186	0.43303
0.71054	0.69868	NaN	NaN	NaN	NaN	NaN	NaN	NaN	NaN	0.69658	NaN	NaN	NaN	NaN	0.64545	1.0453	NaN	NaN	1.3846	1.0569	NaN	NaN	1.2185	NaN	1.0401	1.2426	NaN	1.528	1.7753	NaN	NaN	1.4074	NaN	NaN	NaN	0.81577	0.97804	0.87095	0.75138	NaN	0.8314	0.84565	NaN	1.1776	NaN	NaN	NaN	1.1108	1.092
0.84444	NaN	NaN	3.6017	NaN	NaN	NaN	NaN	5.1796	NaN	NaN	NaN	NaN	NaN	NaN	NaN	NaN	NaN	NaN	NaN	NaN	NaN	NaN	NaN	NaN	NaN	NaN	NaN	NaN	NaN	NaN	NaN	NaN	NaN	NaN	NaN	NaN	NaN	NaN	NaN	NaN	NaN	NaN	NaN	NaN	NaN	NaN	NaN	NaN	NaN
1.2176	1.6776	1.0293	0.6185	1.9195	1.0784	NaN	1.3937	0.68453	0.89099	1.4789	1.0907	1.5983	NaN	NaN	NaN	1.4997	NaN	NaN	0.98424	0.82747	0.87595	NaN	1.3907	2.7584	2.6529	2.3949	2.19	NaN	NaN	3.6651	1.7297	NaN	2.0136	NaN	NaN	NaN	1.2765	NaN	1.0699	1.6075	0.92635	NaN	NaN	0.76903	NaN	1.1559	0.95945	1.0587	1.4396
1.0167	1.1206	1.3529	0.8837	0.96953	0.7344	0.79333	0.79134	0.82369	0.60068	0.66091	0.74901	0.71552	0.6218	0.471	0.44174	NaN	0.35799	1.4611	1.7884	1.9838	NaN	1.109	1.9772	1.4707	1.3605	NaN	2.137	1.7924	2.1419	1.7012	1.7423	1.4822	1.1855	0.96373	1.0906	0.81397	0.95419	1.2713	1.0983	NaN	NaN	0.83802	NaN	NaN	NaN	NaN	1.0559	NaN	1.2791
NaN	NaN	NaN	NaN	NaN	NaN	NaN	NaN	NaN	NaN	NaN	NaN	NaN	NaN	NaN	NaN	NaN	NaN	NaN	NaN	NaN	NaN	NaN	NaN	NaN	NaN	1.7032	NaN	NaN	NaN	NaN	NaN	NaN	NaN	NaN	NaN	0.81397	0.95419	NaN	1.0983	NaN	NaN	0.83802	NaN	NaN	NaN	NaN	NaN	NaN	1.2791
0.72715	1.6009	0.87493	1.258	0.93345	1.0688	0.76991	1.1673	NaN	0.74593	1.1591	NaN	NaN	NaN	NaN	0.81855	NaN	0.95487	1.1887	2.9527	0.93008	0.78006	NaN	2.6481	NaN	NaN	2.14	2.5162	1.4858	2.5057	2.6972	NaN	2.4118	2.8581	NaN	2.7736	1.0511	1.5057	0.81254	NaN	1.2397	1.3355	NaN	1.2786	NaN	1.4109	NaN	2.07	1.8996	2.0814
0.88243	0.80248	0.89189	0.97747	0.82274	0.69085	0.65272	0.47304	0.81164	0.36431	0.69398	0.66046	0.41666	NaN	NaN	NaN	0.50268	NaN	1.0706	NaN	2.584	1.9472	0.43719	0.25225	1.0095	1.1744	0.88389	0.65089	1.1833	0.98256	0.80681	0.59831	NaN	0.72634	0.81005	0.2765	NaN	NaN	NaN	NaN	NaN	NaN	NaN	NaN	NaN	NaN	NaN	NaN	NaN	NaN
0.86626	0.87127	0.95435	0.47642	1.0159	0.70502	0.60627	NaN	NaN	NaN	0.98796	NaN	NaN	NaN	NaN	NaN	NaN	NaN	NaN	0.59194	NaN	1.6392	NaN	0.57361	1.1433	NaN	0.74545	NaN	NaN	NaN	NaN	NaN	NaN	NaN	NaN	NaN	NaN	NaN	0.95901	0.67206	0.67914	0.417	1.1392	NaN	0.32652	NaN	NaN	NaN	NaN	NaN
NaN	NaN	NaN	NaN	NaN	NaN	NaN	NaN	NaN	NaN	NaN	NaN	NaN	NaN	NaN	NaN	NaN	NaN	NaN	NaN	NaN	NaN	NaN	NaN	NaN	NaN	NaN	NaN	NaN	NaN	NaN	NaN	NaN	NaN	NaN	NaN	NaN	NaN	NaN	NaN	NaN	NaN	NaN	NaN	NaN	NaN	NaN	NaN	NaN	NaN
1.0271	1.0401	0.92585	0.69649	0.87393	0.75337	0.73134	0.84732	0.6453	0.69585	0.84605	0.82874	0.71274	0.75087	0.71018	0.61365	0.87408	0.37473	1.2268	1.3447	1.4044	1.3594	1.3374	1.3236	1.3525	1.5512	1.2653	1.42	1.506	1.5617	1.3988	1.3876	1.2995	1.3488	1.2527	1.1109	0.9388	1.1471	0.96517	0.88139	0.93031	0.93744	1.0508	0.76721	0.72427	0.80389	0.94592	0.99748	0.98776	1.1344
0.82807	0.75403	0.63384	0.87397	0.63691	0.69706	0.98401	0.49212	0.59034	0.5848	0.67271	0.20269	NaN	0.32701	NaN	NaN	0.30816	NaN	NaN	NaN	NaN	NaN	NaN	NaN	NaN	NaN	NaN	NaN	NaN	NaN	NaN	NaN	NaN	NaN	NaN	NaN	NaN	NaN	NaN	NaN	NaN	NaN	NaN	NaN	NaN	NaN	NaN	NaN	NaN	NaN
NaN	NaN	NaN	NaN	NaN	NaN	NaN	NaN	NaN	NaN	NaN	NaN	NaN	NaN	NaN	NaN	NaN	NaN	NaN	NaN	NaN	NaN	NaN	NaN	NaN	NaN	NaN	NaN	NaN	NaN	NaN	NaN	NaN	NaN	NaN	NaN	NaN	NaN	NaN	NaN	NaN	NaN	NaN	NaN	NaN	NaN	NaN	NaN	NaN	NaN
NaN	NaN	NaN	NaN	NaN	NaN	NaN	NaN	NaN	NaN	NaN	NaN	NaN	NaN	NaN	NaN	NaN	NaN	NaN	NaN	NaN	NaN	NaN	NaN	NaN	NaN	NaN	NaN	NaN	NaN	NaN	NaN	NaN	NaN	NaN	NaN	NaN	NaN	NaN	NaN	NaN	NaN	NaN	NaN	NaN	NaN	NaN	NaN	NaN	NaN
NaN	NaN	NaN	NaN	NaN	NaN	NaN	NaN	NaN	NaN	NaN	NaN	NaN	NaN	NaN	NaN	NaN	NaN	NaN	NaN	NaN	NaN	NaN	NaN	NaN	NaN	NaN	NaN	NaN	NaN	NaN	NaN	NaN	NaN	NaN	NaN	NaN	NaN	NaN	NaN	NaN	NaN	NaN	NaN	NaN	NaN	NaN	NaN	NaN	NaN
0.99351	1.2064	0.68781	0.90526	0.8168	0.98847	0.89204	0.991	1.0079	0.82322	0.83001	0.62752	0.4994	0.63802	0.41899	0.21852	0.38063	0.091575	1.1963	2.2823	0.88691	0.80086	1.3836	1.4435	1.5465	1.9049	2.0447	1.9964	1.4652	2.3648	1.7013	1.4894	1.2569	0.87233	0.42834	0.51248	0.97239	1.0699	0.80842	0.88381	0.89683	1.1263	0.78952	0.94972	1.0145	1.395	0.99244	1.0787	0.98035	0.98951
0.88913	0.98378	0.62298	0.76525	0.90754	1.0537	0.76522	0.76106	0.75015	0.70077	0.88835	0.83747	0.79577	0.80131	0.49235	0.4326	0.94301	0.67678	1.6532	1.1315	NaN	NaN	NaN	0.99207	NaN	1.2462	1.9811	1.0204	NaN	1.4412	1.0166	1.1132	0.73452	1.2725	NaN	NaN	1.0682	0.84209	0.68579	0.7925	0.9786	1.0914	0.76532	NaN	0.7223	NaN	0.98717	0.82784	0.62293	1.5543
0.96965	1.2067	0.73954	0.74601	0.70775	0.73813	0.6126	0.57143	0.38373	0.39254	0.31084	NaN	0.076975	NaN	NaN	NaN	NaN	NaN	1.2603	2.1834	1.0295	1.1025	2.175	2.2132	1.5882	1.8492	1.5808	1.3185	0.86408	0.57876	0.28478	0.12803	NaN	NaN	NaN	NaN	0.91577	1.4654	0.79208	1.1005	0.92177	1.0522	NaN	0.63216	0.54105	0.32878	NaN	NaN	NaN	NaN
NaN	NaN	NaN	NaN	NaN	NaN	NaN	NaN	NaN	NaN	NaN	NaN	NaN	NaN	NaN	NaN	NaN	NaN	NaN	NaN	NaN	NaN	NaN	NaN	NaN	NaN	NaN	NaN	NaN	NaN	NaN	NaN	NaN	NaN	NaN	NaN	NaN	NaN	NaN	NaN	NaN	NaN	NaN	NaN	NaN	NaN	NaN	NaN	NaN	NaN
1.0071	1.3709	0.69234	1.0897	1.0233	1.0361	0.7898	0.94226	0.95397	0.74426	0.96656	1.0784	0.86692	0.67068	0.31066	0.11852	NaN	0.021021	1.449	2.3163	1.1845	0.99907	2.0141	2.4115	1.9899	2.1045	2.0759	2.0383	1.4592	1.9862	2.109	1.715	1.126	0.58727	0.18116	NaN	1.1301	1.3784	0.75479	1.0174	1.181	1.2659	0.86649	1.0264	1.0724	0.92937	1.2885	1.3643	1.188	0.82238
NaN	NaN	NaN	NaN	NaN	NaN	NaN	NaN	NaN	NaN	NaN	NaN	NaN	NaN	NaN	NaN	NaN	NaN	NaN	NaN	NaN	NaN	NaN	NaN	NaN	NaN	NaN	NaN	NaN	NaN	NaN	NaN	NaN	NaN	NaN	NaN	NaN	NaN	NaN	NaN	NaN	NaN	NaN	NaN	NaN	NaN	NaN	NaN	NaN	NaN
NaN	NaN	NaN	NaN	0.92084	NaN	0.92315	NaN	NaN	NaN	NaN	0.87897	NaN	NaN	0.60547	0.23122	NaN	NaN	NaN	NaN	NaN	2.0031	NaN	NaN	NaN	1.8083	NaN	NaN	NaN	NaN	NaN	NaN	NaN	NaN	0.94963	0.77931	NaN	NaN	NaN	NaN	0.71132	NaN	NaN	NaN	NaN	1.2278	NaN	NaN	1.2023	NaN
NaN	NaN	0.83163	0.90892	1.2208	0.93881	NaN	NaN	0.84278	0.87323	0.86158	NaN	0.85809	0.74214	0.66771	0.39394	NaN	0.32037	1.282	1.8841	1.9483	1.1851	2.1153	1.8105	1.8043	NaN	1.8768	1.8352	1.6412	1.9027	1.546	1.4961	1.4067	0.43679	0.84845	NaN	1.0527	0.32511	1.2202	0.59974	1.0696	1.1766	0.88297	1.1666	1.014	0.99159	0.59269	1.3045	1.0742	1.2073
NaN	NaN	NaN	NaN	NaN	0.44101	NaN	NaN	NaN	NaN	NaN	NaN	NaN	NaN	NaN	NaN	0.69192	NaN	NaN	NaN	NaN	NaN	NaN	NaN	NaN	NaN	NaN	NaN	NaN	NaN	NaN	NaN	NaN	NaN	NaN	NaN	NaN	NaN	NaN	NaN	NaN	NaN	NaN	NaN	NaN	NaN	NaN	NaN	NaN	NaN
NaN	NaN	NaN	NaN	NaN	NaN	NaN	NaN	NaN	NaN	NaN	NaN	NaN	NaN	NaN	NaN	NaN	NaN	NaN	NaN	NaN	NaN	NaN	NaN	NaN	NaN	NaN	NaN	NaN	NaN	NaN	NaN	NaN	NaN	NaN	NaN	NaN	1.5256	NaN	1.8847	NaN	2.5885	NaN	NaN	3.413	3.189	2.4602	3.75	3.6367	NaN
NaN	NaN	NaN	NaN	NaN	NaN	NaN	NaN	NaN	NaN	NaN	NaN	NaN	NaN	NaN	NaN	NaN	NaN	NaN	NaN	NaN	NaN	NaN	NaN	NaN	NaN	NaN	NaN	NaN	NaN	NaN	NaN	NaN	NaN	NaN	NaN	NaN	NaN	NaN	NaN	NaN	NaN	NaN	NaN	NaN	NaN	NaN	NaN	NaN	NaN
NaN	NaN	NaN	NaN	NaN	NaN	NaN	NaN	NaN	NaN	NaN	NaN	NaN	NaN	NaN	NaN	NaN	NaN	NaN	NaN	NaN	NaN	NaN	NaN	NaN	NaN	NaN	NaN	NaN	NaN	NaN	NaN	NaN	NaN	NaN	NaN	NaN	NaN	NaN	NaN	NaN	NaN	NaN	NaN	NaN	NaN	NaN	NaN	NaN	NaN
0.61569	0.94925	0.55784	1.2712	NaN	0.8583	0.5868	0.49088	1.2133	0.61642	0.40237	NaN	0.42941	1.547	0.56255	0.52545	NaN	1.401	1.3972	6.8639	1.2234	0.99083	NaN	3.4514	0.80504	2.1223	NaN	1.0851	NaN	NaN	0.62164	1.303	1.8252	1.0266	0.80768	0.99753	1.0577	1.4471	0.96162	1.7758	1.2014	1.1954	NaN	1.9258	0.84246	0.33098	NaN	0.7768	NaN	1.7907
0.91254	0.94925	0.55784	1.2712	NaN	0.8583	0.5868	0.49088	1.2133	0.61642	0.40237	NaN	0.42941	0.75025	0.56255	0.52545	0.59019	0.24776	1.2887	6.8639	1.2234	0.99083	NaN	3.4514	0.80504	NaN	2.0061	1.0851	NaN	NaN	0.62164	1.303	1.7041	1.0266	0.80768	0.99753	1.0577	1.4471	0.96162	1.7758	NaN	1.1954	NaN	1.9258	0.84246	0.33098	NaN	0.7768	NaN	1.7907
0.86081	1.4488	0.62046	NaN	NaN	NaN	0.97907	1.0364	0.99161	0.95334	0.88841	1.0864	1.5249	1.864	NaN	1.408	2.7622	1.2378	1.3515	2.2428	1.3494	1.1372	2.9926	2.5319	3.2337	2.6766	2.5398	1.8748	1.3463	1.7198	2.3043	2.2835	2.3388	2.8551	2.0342	2.2984	0.97313	NaN	0.83815	NaN	1.5821	1.534	0.92631	1.2866	1.4041	0.78426	NaN	1.1448	NaN	2.3977
NaN	NaN	NaN	NaN	NaN	NaN	NaN	NaN	NaN	NaN	NaN	NaN	NaN	NaN	1.3972	NaN	NaN	NaN	NaN	NaN	NaN	NaN	NaN	NaN	NaN	NaN	NaN	NaN	NaN	NaN	NaN	NaN	2.2965	NaN	NaN	NaN	NaN	NaN	NaN	NaN	NaN	NaN	NaN	NaN	NaN	NaN	NaN	NaN	1.5527	NaN
NaN	NaN	NaN	NaN	NaN	NaN	NaN	NaN	NaN	NaN	NaN	NaN	NaN	NaN	NaN	NaN	NaN	NaN	1.2246	NaN	NaN	NaN	NaN	NaN	NaN	NaN	NaN	NaN	1.8539	3.8412	NaN	2.1794	NaN	NaN	NaN	2.4347	NaN	NaN	NaN	NaN	NaN	NaN	NaN	NaN	NaN	NaN	NaN	NaN	NaN	NaN
1.0938	1.1485	0.58636	0.6441	0.53242	0.37829	NaN	NaN	NaN	NaN	NaN	NaN	NaN	NaN	NaN	NaN	NaN	NaN	1.344	1.7488	0.96697	0.67132	1.5571	1.2492	0.98773	1.0489	0.88637	0.8286	NaN	NaN	NaN	NaN	NaN	NaN	NaN	NaN	0.92155	1.2332	0.616	0.69353	0.60751	0.73519	NaN	NaN	NaN	NaN	NaN	NaN	NaN	NaN
1.1271	1.1511	1.0995	1.0369	1.0285	NaN	1.1013	0.9395	0.79185	0.71042	0.6517	0.87072	NaN	0.55343	0.36104	NaN	NaN	NaN	1.234	NaN	1.8264	1.5765	NaN	1.6932	1.6196	1.7144	1.7201	1.6208	1.8095	1.7709	1.4418	1.0242	0.96721	0.98136	0.91351	0.70847	1.02	NaN	1.1563	1.0864	1.176	1.0842	1.1715	NaN	0.75714	NaN	0.83353	0.85371	0.72787	0.68665
0.92992	1.0979	0.91076	0.93465	0.71489	0.82876	0.89024	0.99745	0.99981	0.74683	0.79975	0.54051	0.94454	1.1909	0.86374	0.78117	1.0706	0.27448	1.0596	2.704	1.3856	1.7652	1.5348	2.6939	2.1768	1.5009	2.0475	2.2156	2.4469	2.6447	1.6853	1.8219	2.7696	2.1791	1.843	1.9125	0.87757	1.5108	1.2345	1.2286	0.63275	1.3259	1.3448	1.68	1.1747	1.2286	1.1613	1.3784	1.7679	1.9994
NaN	NaN	NaN	NaN	NaN	NaN	NaN	NaN	NaN	NaN	NaN	NaN	NaN	NaN	NaN	NaN	NaN	NaN	1.2721	2.0268	1.8698	1.9405	2.3458	2.003	1.8387	1.9872	1.8722	2.1542	2.2211	2.4694	2.0565	2.0189	1.8368	1.9645	1.759	1.5424	NaN	NaN	NaN	NaN	NaN	NaN	NaN	NaN	NaN	NaN	NaN	NaN	NaN	NaN
0.91511	0.88932	0.76608	0.36134	NaN	0.59199	0.51462	0.54228	0.62024	0.50495	0.61001	0.71027	0.72894	0.67239	0.57442	0.52543	0.88776	0.89552	NaN	NaN	NaN	NaN	NaN	0.59082	NaN	1.1363	NaN	NaN	NaN	NaN	NaN	NaN	NaN	NaN	0.82773	NaN	0.89079	0.65916	1.2813	0.67978	0.69173	0.4322	0.62568	0.35395	0.48987	1.2294	1.2883	1.0242	0.74826	0.65358
0.90689	0.90843	0.76608	0.36134	NaN	0.76808	0.54427	0.70278	0.30049	0.52198	0.87113	1.3427	0.82696	0.55506	0.68132	0.52543	1.2613	0.89552	1.6511	NaN	NaN	1.4	0.97251	NaN	1.5929	1.8972	1.5368	1.939	NaN	1.3914	NaN	1.689	0.79994	NaN	NaN	NaN	0.89079	0.65916	1.2813	0.48961	1.3223	0.4322	0.46429	0.73481	0.62825	NaN	1.0546	0.96038	0.57981	0.55579
0.89875	1.5051	1.1473	NaN	1.5044	0.79433	0.48659	1.4973	1.2803	1.3919	1.0186	0.37573	0.98374	NaN	0.4843	1.2424	2.3081	1.5499	1.4167	0.75922	1.6589	1.4747	1.0361	NaN	1.3115	1.3931	1.2047	1.1504	1.4172	1.4673	1.4009	1.1011	0.79994	1.3007	2.113	1.3433	1.0646	0.71863	1.239	0.85244	1.1274	0.81198	1.0726	1.5255	0.64003	0.80292	0.94056	1.0651	0.99479	1.1263
0.86457	0.92465	0.90445	0.6295	0.86314	0.82293	0.67055	0.90808	0.70014	0.58764	0.69704	0.70822	0.54528	0.58558	0.39556	0.21598	0.46518	0.20965	1.2336	1.682	1.1923	1.3834	1.2826	1.4705	1.6244	1.2069	1.4286	1.3724	1.5131	1.2952	1.3698	1.4794	0.94926	0.84095	0.95382	0.69852	1.0051	1.1333	0.87592	0.8871	1.0271	0.97667	0.95166	1.0746	0.92877	0.98265	0.73739	0.78034	0.81067	0.67452
0.98998	0.98334	0.79762	0.71591	0.86984	0.75267	0.71465	0.68089	0.63876	0.63584	0.81934	0.80412	0.62184	0.5996	0.5855	0.51883	1.1478	0.57543	0.99165	1.4663	1.3963	1.3362	1.4793	1.2888	1.3355	1.4251	1.2294	1.2772	1.8197	1.6359	1.406	1.2456	1.1535	1.5347	1.9641	1.3224	0.95731	0.93678	1.0585	NaN	1.0505	1.0329	0.84232	0.97893	0.75994	0.53584	0.81252	0.90444	0.79009	0.7539
0.92065	0.9026	0.83867	0.64696	0.8229	0.84407	0.70022	0.79767	0.68533	0.69887	0.77425	0.77099	0.70355	0.9028	0.79932	0.62181	1.056	0.49925	1.2087	1.3841	1.1542	1.2514	1.437	1.5631	1.4225	1.4785	1.5259	1.5185	1.4703	1.6499	1.6179	1.6557	1.4766	1.6833	1.4234	1.3712	0.90086	1.0452	0.92982	0.85512	0.90948	0.96596	0.84973	0.803	0.67979	0.70223	0.98774	1.1353	1.1572	1.248
NaN	NaN	NaN	NaN	NaN	NaN	NaN	NaN	NaN	NaN	NaN	NaN	NaN	NaN	NaN	NaN	NaN	NaN	1.544	1.4139	1.5899	1.0588	NaN	2.2103	2.8829	NaN	2.5124	2.0735	2.4475	NaN	NaN	3.3032	NaN	NaN	NaN	NaN	NaN	NaN	NaN	NaN	NaN	NaN	NaN	NaN	NaN	NaN	NaN	NaN	NaN	NaN
NaN	2.0584	NaN	NaN	NaN	0.62424	NaN	NaN	0.57904	0.82521	0.89716	NaN	NaN	0.91982	NaN	1.1737	1.6698	NaN	1.0453	1.7351	1.1943	0.87563	1.5553	1.4796	1.6322	2.044	1.4029	1.5669	1.187	1.9401	1.8345	1.9405	1.7514	2.3909	1.4436	2.0053	0.78238	NaN	0.8354	0.88214	1.4752	1.2591	0.88333	0.88796	0.90384	NaN	1.9837	1.1882	1.3643	1.4397
0.81567	0.95517	0.87943	0.64119	0.78722	0.80451	0.67018	0.87762	0.57218	0.65435	0.72074	0.93416	0.81134	0.89626	0.77298	0.75813	1.4128	0.56543	0.89157	NaN	1.6001	1.3145	NaN	1.6011	1.5209	1.3884	1.1978	1.3976	1.7232	1.6346	1.6984	1.6896	1.8376	1.9711	2.1408	1.8332	0.77559	0.96244	1.0943	0.69351	0.84424	0.96279	0.83642	0.81427	0.74786	0.82318	1.1938	1.3142	1.2071	1.3719
1.0805	1.111	0.90854	1.3866	0.62481	1.0654	0.83519	1.0026	1.1087	0.86369	0.89984	0.50374	1.1484	1.3622	0.59891	0.68537	0.81208	0.52138	1.5534	2.9507	1.4572	2.4374	NaN	3.1217	2.8171	1.4823	2.5698	2.5914	3.5439	2.8655	2.5913	3.5908	2.9455	3.5318	2.9456	2.2727	1.1282	NaN	1.4417	1.8314	0.59833	1.6021	1.5045	1.8747	2.2815	1.4128	1.3468	1.8146	2.019	2.0261
1.0311	1.5593	1.4156	1.1442	1.4173	1.3473	1.3318	1.2783	1.1611	1.2422	1.4869	1.5915	1.3469	1.4034	1.3734	1.1328	1.7208	0.64513	1.32	2.2908	2.1281	1.9694	2.6427	2.2998	1.8492	2.4388	1.8341	2.4101	2.3272	2.9833	2.3239	2.4369	2.1373	2.8012	2.3324	2.0881	0.97033	1.4786	1.3867	1.4226	1.4475	1.3612	1.4623	1.1671	1.2447	1.191	1.7339	1.9447	1.8778	1.9754
0.83263	0.99352	0.87107	0.72923	0.6735	0.78676	0.70029	0.80638	0.68661	0.611	0.73496	0.62362	0.71514	0.74471	0.6402	0.54691	0.93459	0.37286	1.1933	1.361	1.0972	1.2253	1.509	1.4664	1.3087	1.3819	1.2006	1.2198	1.4792	1.5127	1.5254	1.5065	1.3493	1.4508	1.7416	1.1855	0.80815	1.1642	0.99549	0.85093	0.90319	0.95286	0.99921	0.82304	0.80563	0.73281	0.98389	1.047	1.1209	1.1709
1.0281	0.95282	0.65484	0.59229	0.55515	0.6809	0.47461	0.49295	0.56916	0.45511	NaN	NaN	NaN	NaN	NaN	NaN	NaN	NaN	1.1158	1.453	1.173	0.98721	1.6303	1.173	1.0714	0.8874	1.1453	1.0834	0.97635	0.65637	NaN	NaN	NaN	NaN	NaN	NaN	NaN	NaN	1.0601	NaN	0.83387	NaN	NaN	0.77607	NaN	NaN	NaN	NaN	NaN	NaN
NaN	NaN	NaN	NaN	NaN	NaN	NaN	NaN	NaN	NaN	NaN	NaN	NaN	NaN	NaN	NaN	NaN	NaN	NaN	NaN	NaN	NaN	NaN	NaN	NaN	NaN	NaN	NaN	1.8742	NaN	NaN	NaN	NaN	NaN	NaN	NaN	NaN	NaN	NaN	NaN	NaN	NaN	NaN	NaN	NaN	NaN	NaN	NaN	1.4401	NaN
0.93043	1.0407	1.11	0.7892	0.83783	0.94279	0.83477	0.97436	0.67321	0.71494	0.80823	0.73894	0.87667	0.87154	0.80632	0.76812	1.2644	0.58093	1.1909	1.7538	1.0784	1.4149	1.86	1.7675	1.6547	1.3995	1.5303	1.6581	1.8742	2.0179	1.918	2.0369	2.1296	2.4582	1.884	1.7597	1.0087	NaN	1.0633	1.0946	0.6821	0.90404	0.95	0.93554	0.90997	0.69161	0.98266	0.98647	NaN	1.4934
1.0609	0.90719	0.87058	0.62278	0.91459	0.80051	0.68011	0.76984	0.39026	0.64765	0.64781	0.55457	0.3678	0.27169	0.22547	NaN	NaN	NaN	1.2071	1.6137	1.3862	1.1532	NaN	1.2457	1.1192	1.4724	1.4963	1.1695	NaN	NaN	0.90331	NaN	NaN	NaN	NaN	NaN	NaN	NaN	NaN	NaN	NaN	NaN	NaN	NaN	NaN	NaN	NaN	NaN	NaN	NaN
NaN	NaN	NaN	NaN	NaN	NaN	NaN	NaN	NaN	NaN	NaN	NaN	NaN	NaN	NaN	NaN	NaN	NaN	NaN	NaN	NaN	NaN	NaN	NaN	NaN	NaN	NaN	NaN	NaN	NaN	NaN	NaN	NaN	NaN	NaN	NaN	NaN	NaN	NaN	NaN	NaN	NaN	NaN	NaN	NaN	NaN	NaN	NaN	NaN	NaN
NaN	NaN	NaN	NaN	NaN	NaN	NaN	NaN	NaN	NaN	NaN	NaN	NaN	NaN	NaN	NaN	NaN	NaN	NaN	NaN	NaN	NaN	NaN	NaN	NaN	NaN	NaN	NaN	NaN	NaN	NaN	NaN	NaN	NaN	NaN	NaN	NaN	NaN	NaN	NaN	NaN	NaN	NaN	NaN	NaN	NaN	NaN	NaN	NaN	NaN
0.86277	NaN	1.3927	NaN	0.5643	NaN	NaN	NaN	NaN	NaN	NaN	NaN	NaN	NaN	NaN	NaN	NaN	NaN	1.217	NaN	NaN	2.0347	NaN	NaN	NaN	NaN	NaN	NaN	0.82367	NaN	NaN	NaN	NaN	NaN	NaN	NaN	1.0984	2.0772	0.96987	NaN	NaN	1.816	NaN	NaN	NaN	NaN	NaN	NaN	NaN	NaN
1.0707	1.0934	0.67164	0.58168	0.73345	0.85535	NaN	0.7018	0.30579	NaN	NaN	NaN	NaN	NaN	NaN	NaN	NaN	0.11176	1.3325	1.228	0.97154	0.6939	1.6863	1.7498	1.6857	1.6366	NaN	1.6123	0.82367	0.29021	NaN	NaN	NaN	NaN	NaN	NaN	1.0718	1.3335	0.58826	0.82718	0.8711	0.96934	0.5972	0.46444	0.53656	0.27013	0.31344	NaN	NaN	NaN
NaN	NaN	0.99606	0.78336	0.96534	NaN	NaN	0.91731	0.77784	0.75898	NaN	0.92236	0.92033	0.98064	0.95815	NaN	1.0354	0.38422	1.3055	1.7649	1.5239	1.4501	1.3856	1.5599	1.429	1.5381	NaN	1.7355	NaN	1.8493	1.6343	1.6386	1.4619	1.6043	1.6214	1.3698	NaN	NaN	1.0152	0.95774	0.99987	1.0854	1.0462	1.0163	0.86527	0.86979	1.2327	1.0783	1.2937	1.5515
0.69979	NaN	NaN	NaN	NaN	NaN	0.65331	0.95488	0.6988	0.71773	0.80037	1.0134	NaN	NaN	NaN	NaN	NaN	NaN	1.1768	2.4051	NaN	2.3918	NaN	1.4944	NaN	1.6055	1.6858	1.8725	NaN	NaN	1.4541	NaN	1.7997	NaN	0.98267	NaN	NaN	NaN	NaN	NaN	NaN	NaN	NaN	NaN	NaN	NaN	NaN	NaN	NaN	NaN
NaN	NaN	NaN	NaN	NaN	NaN	NaN	NaN	NaN	NaN	NaN	NaN	NaN	NaN	NaN	NaN	NaN	NaN	NaN	NaN	NaN	NaN	NaN	NaN	NaN	NaN	NaN	NaN	NaN	NaN	NaN	NaN	NaN	NaN	NaN	NaN	NaN	NaN	NaN	NaN	NaN	NaN	NaN	NaN	NaN	NaN	NaN	NaN	NaN	NaN
NaN	NaN	NaN	NaN	NaN	NaN	NaN	NaN	NaN	NaN	NaN	NaN	NaN	NaN	NaN	NaN	NaN	NaN	NaN	NaN	NaN	NaN	NaN	NaN	NaN	NaN	NaN	NaN	NaN	NaN	NaN	NaN	0.9841	0.71395	NaN	NaN	NaN	NaN	NaN	NaN	NaN	NaN	NaN	NaN	NaN	NaN	NaN	NaN	NaN	NaN
NaN	NaN	NaN	NaN	NaN	NaN	NaN	NaN	NaN	NaN	NaN	NaN	NaN	NaN	NaN	NaN	NaN	NaN	NaN	NaN	NaN	NaN	NaN	NaN	NaN	NaN	NaN	NaN	NaN	NaN	NaN	NaN	NaN	NaN	NaN	NaN	NaN	NaN	NaN	NaN	NaN	NaN	NaN	NaN	NaN	NaN	NaN	NaN	NaN	NaN
0.89409	0.91149	0.87466	NaN	0.91457	0.69384	0.728	0.68726	NaN	NaN	0.43976	NaN	NaN	0.062273	0.089729	0.088521	NaN	0.053501	0.99775	0.67342	1.1704	1.2819	1.0986	0.85729	0.78207	0.95981	1.2432	1.2196	1.0569	0.48586	NaN	NaN	0.084358	NaN	NaN	0.10882	1.3092	0.86196	1.0061	0.85377	0.74493	0.72846	0.7834	0.67793	0.46513	0.6828	NaN	NaN	NaN	0.13302
NaN	NaN	NaN	NaN	NaN	NaN	NaN	NaN	NaN	NaN	NaN	NaN	NaN	NaN	NaN	NaN	NaN	NaN	NaN	NaN	NaN	NaN	NaN	NaN	NaN	NaN	NaN	NaN	NaN	NaN	NaN	NaN	NaN	NaN	NaN	NaN	NaN	NaN	NaN	NaN	NaN	NaN	NaN	NaN	NaN	NaN	NaN	NaN	NaN	NaN
NaN	NaN	NaN	NaN	NaN	NaN	NaN	NaN	NaN	NaN	NaN	NaN	NaN	NaN	NaN	NaN	NaN	NaN	NaN	NaN	NaN	NaN	NaN	NaN	NaN	NaN	NaN	NaN	NaN	NaN	NaN	NaN	NaN	NaN	NaN	NaN	NaN	NaN	NaN	NaN	NaN	NaN	NaN	NaN	NaN	NaN	NaN	NaN	NaN	NaN
NaN	1.1578	0.65159	0.71639	0.94835	0.92768	0.70518	0.85077	0.69835	0.69	0.57675	0.53786	0.40726	0.27383	NaN	NaN	NaN	NaN	1.5964	2.1462	1.0646	0.92559	1.6813	1.8018	1.8781	1.951	1.728	1.5405	1.2606	1.187	1.0512	0.7069	0.44579	0.28818	NaN	NaN	NaN	1.2157	0.71043	1.251	1.0101	0.99713	0.89831	0.90893	1.034	0.58881	0.79011	0.542	0.48397	NaN
0.84192	0.83495	0.73284	0.28563	0.84734	0.62257	0.54158	1.6393	0.18222	1.2514	1.828	2.4842	1.7056	1.3635	0.25424	NaN	1.1694	0.72047	1.2837	0.42013	1.2994	1.4696	0.7043	0.76248	0.7541	1.105	2.1145	0.94897	2.3575	3.4175	2.8457	0.38156	1.6407	1.6449	0.93186	0.99335	1.1282	0.70491	0.61692	0.51752	0.90376	1.0685	1.2852	NaN	1.0403	1.4227	1.636	3.8896	1.3702	6.9019
0.9586	NaN	0.73284	NaN	NaN	NaN	NaN	NaN	NaN	NaN	NaN	NaN	NaN	NaN	NaN	NaN	NaN	NaN	1.2837	0.42013	1.2994	0.76765	0.70862	0.76248	0.7541	1.105	0.78027	NaN	0.77754	0.76399	0.80589	0.38156	0.2899	0.34343	0.256	0.18988	NaN	NaN	NaN	NaN	NaN	NaN	NaN	NaN	NaN	NaN	NaN	NaN	NaN	NaN
0.9586	NaN	NaN	NaN	NaN	NaN	NaN	NaN	NaN	NaN	NaN	2.4842	NaN	NaN	0.25424	NaN	1.1694	NaN	NaN	NaN	NaN	1.4696	0.7043	NaN	NaN	NaN	NaN	NaN	0.77754	NaN	NaN	1.6539	NaN	NaN	NaN	NaN	NaN	NaN	NaN	NaN	NaN	NaN	1.2852	NaN	NaN	NaN	NaN	NaN	NaN	NaN
0.9365	0.72036	0.73284	0.28563	0.47453	0.60835	0.4996	0.63756	0.18222	0.4016	0.55389	0.41783	0.40835	0.18996	0.25424	NaN	0.20871	NaN	NaN	NaN	NaN	1.4696	NaN	NaN	NaN	NaN	NaN	0.94897	0.77754	NaN	NaN	NaN	NaN	NaN	0.93186	NaN	NaN	NaN	NaN	NaN	NaN	NaN	NaN	NaN	1.1038	1.0092	NaN	NaN	1.3702	NaN
1.4481	NaN	NaN	0.49722	0.79473	0.5712	0.48312	0.34743	0.1404	NaN	NaN	NaN	NaN	NaN	NaN	NaN	NaN	NaN	1.262	0.70281	1.3088	1.0419	1.1289	1.0683	1.4722	1.3104	0.79755	NaN	0.96169	0.20536	NaN	NaN	NaN	NaN	NaN	NaN	1.0123	0.74105	0.59964	0.79387	0.74364	0.54788	0.67782	0.30308	0.21663	0.24097	NaN	NaN	NaN	NaN
NaN	1.1657	0.25264	0.93129	NaN	0.88564	0.48849	0.93772	1.0728	0.96428	0.65916	0.74509	1.0539	0.46767	0.7438	0.37066	0.61676	NaN	1.5164	2.0032	2.2555	1.0687	2.4596	1.3077	2.0619	2.2159	2.199	1.6231	1.5747	2.6499	2.5047	0.95424	2.048	1.2406	NaN	0.67417	0.84852	1.2936	NaN	NaN	NaN	NaN	NaN	NaN	NaN	0.89164	1.5892	2.0154	NaN	NaN
NaN	NaN	NaN	NaN	NaN	NaN	NaN	NaN	NaN	NaN	NaN	NaN	NaN	NaN	NaN	NaN	NaN	NaN	NaN	NaN	NaN	NaN	NaN	NaN	NaN	NaN	NaN	NaN	NaN	NaN	NaN	NaN	NaN	NaN	NaN	NaN	NaN	NaN	NaN	NaN	NaN	NaN	NaN	NaN	NaN	NaN	NaN	NaN	NaN	NaN
NaN	NaN	NaN	NaN	NaN	NaN	NaN	NaN	NaN	NaN	NaN	NaN	NaN	NaN	NaN	NaN	NaN	NaN	NaN	NaN	NaN	NaN	NaN	NaN	NaN	NaN	NaN	NaN	NaN	NaN	NaN	NaN	NaN	NaN	NaN	NaN	NaN	NaN	NaN	NaN	NaN	NaN	NaN	NaN	NaN	NaN	NaN	NaN	NaN	NaN
NaN	NaN	0.76618	NaN	0.74475	NaN	NaN	NaN	0.39531	NaN	NaN	NaN	NaN	NaN	NaN	NaN	NaN	NaN	NaN	NaN	NaN	NaN	NaN	NaN	NaN	NaN	NaN	NaN	NaN	NaN	NaN	NaN	NaN	NaN	NaN	NaN	NaN	NaN	NaN	NaN	NaN	NaN	NaN	NaN	NaN	NaN	NaN	NaN	NaN	NaN
NaN	NaN	NaN	NaN	NaN	NaN	NaN	NaN	NaN	NaN	NaN	NaN	NaN	NaN	NaN	NaN	NaN	NaN	NaN	NaN	NaN	NaN	NaN	NaN	NaN	NaN	NaN	NaN	NaN	NaN	NaN	NaN	NaN	NaN	NaN	NaN	NaN	NaN	NaN	NaN	NaN	NaN	NaN	NaN	NaN	NaN	NaN	NaN	NaN	NaN
NaN	NaN	1.1152	NaN	NaN	NaN	NaN	NaN	NaN	NaN	NaN	1.0475	NaN	NaN	NaN	NaN	NaN	0.56367	NaN	NaN	NaN	NaN	NaN	NaN	NaN	NaN	NaN	NaN	1.7871	NaN	NaN	NaN	NaN	NaN	NaN	NaN	NaN	NaN	NaN	NaN	NaN	NaN	NaN	NaN	NaN	NaN	NaN	NaN	NaN	NaN
1.3458	NaN	1.0326	NaN	NaN	NaN	NaN	NaN	NaN	NaN	NaN	NaN	NaN	NaN	NaN	NaN	NaN	NaN	NaN	NaN	NaN	NaN	NaN	NaN	NaN	NaN	NaN	NaN	NaN	NaN	NaN	NaN	NaN	NaN	NaN	NaN	NaN	NaN	NaN	NaN	NaN	NaN	NaN	NaN	NaN	NaN	NaN	NaN	NaN	NaN
NaN	NaN	NaN	NaN	NaN	NaN	NaN	NaN	NaN	NaN	NaN	NaN	NaN	NaN	NaN	NaN	NaN	NaN	NaN	NaN	NaN	NaN	NaN	NaN	NaN	NaN	NaN	NaN	NaN	NaN	NaN	NaN	NaN	NaN	NaN	NaN	NaN	NaN	NaN	NaN	NaN	NaN	NaN	NaN	NaN	NaN	NaN	NaN	NaN	NaN
NaN	NaN	NaN	NaN	NaN	NaN	NaN	NaN	NaN	NaN	NaN	NaN	NaN	NaN	NaN	NaN	NaN	NaN	2.105	1.5579	1.5489	NaN	NaN	0.7514	NaN	0.92772	0.76392	0.73214	1.5644	NaN	NaN	NaN	NaN	NaN	NaN	NaN	NaN	NaN	NaN	NaN	NaN	NaN	NaN	NaN	NaN	NaN	NaN	NaN	NaN	NaN
NaN	NaN	NaN	NaN	0.9228	NaN	NaN	0.78528	NaN	NaN	NaN	0.78517	0.74636	0.82026	0.71167	0.69122	NaN	NaN	NaN	NaN	NaN	NaN	NaN	NaN	NaN	NaN	NaN	NaN	NaN	NaN	NaN	NaN	NaN	NaN	NaN	NaN	NaN	NaN	NaN	NaN	NaN	NaN	NaN	NaN	NaN	NaN	NaN	NaN	NaN	NaN
NaN	0.96518	NaN	NaN	NaN	NaN	NaN	NaN	NaN	0.66272	0.58242	NaN	NaN	0.7518	NaN	0.78399	NaN	1.0202	NaN	NaN	NaN	NaN	NaN	NaN	NaN	NaN	NaN	NaN	NaN	NaN	NaN	NaN	NaN	NaN	NaN	NaN	NaN	NaN	NaN	NaN	NaN	NaN	NaN	NaN	NaN	NaN	NaN	NaN	NaN	0.89634
0.99902	0.9498	0.77885	1.2375	NaN	1.0095	NaN	NaN	1.1601	NaN	0.61031	NaN	0.80269	NaN	NaN	NaN	NaN	NaN	NaN	NaN	NaN	NaN	NaN	NaN	NaN	1.4468	1.6344	NaN	NaN	NaN	NaN	1.9346	NaN	2.4412	NaN	NaN	NaN	NaN	NaN	1.0272	0.86374	1.2034	NaN	NaN	1.3155	NaN	NaN	1.879	NaN	NaN
NaN	NaN	NaN	NaN	NaN	NaN	NaN	NaN	NaN	NaN	NaN	NaN	NaN	NaN	NaN	NaN	NaN	NaN	NaN	NaN	1.0721	0.58944	NaN	1.1355	NaN	1.875	NaN	2.426	NaN	NaN	NaN	2.2088	NaN	NaN	NaN	1.8019	NaN	NaN	NaN	NaN	NaN	NaN	NaN	NaN	NaN	NaN	NaN	NaN	NaN	NaN
NaN	NaN	7.3236	2.5217	4.4423	0.99688	NaN	NaN	NaN	NaN	NaN	1.1578	NaN	NaN	NaN	NaN	NaN	NaN	NaN	NaN	NaN	3.8978	1.6653	NaN	NaN	NaN	NaN	NaN	NaN	NaN	NaN	NaN	NaN	NaN	0.76422	NaN	NaN	NaN	5.0572	1.1089	1.4852	NaN	NaN	NaN	NaN	NaN	NaN	NaN	NaN	NaN
NaN	NaN	NaN	NaN	NaN	NaN	1.2787	NaN	NaN	NaN	NaN	NaN	NaN	NaN	NaN	NaN	NaN	NaN	NaN	NaN	NaN	NaN	NaN	NaN	NaN	NaN	2.7987	NaN	NaN	NaN	NaN	NaN	NaN	NaN	NaN	NaN	NaN	2.4161	NaN	NaN	NaN	NaN	NaN	NaN	NaN	NaN	NaN	NaN	NaN	NaN
NaN	NaN	NaN	NaN	NaN	NaN	1.2787	NaN	NaN	NaN	NaN	NaN	NaN	NaN	NaN	NaN	NaN	NaN	NaN	NaN	NaN	NaN	NaN	NaN	NaN	NaN	2.7987	NaN	NaN	NaN	NaN	NaN	NaN	NaN	NaN	NaN	NaN	2.4161	NaN	NaN	NaN	NaN	NaN	NaN	NaN	NaN	NaN	NaN	NaN	NaN
NaN	NaN	NaN	NaN	NaN	NaN	1.2787	1.4867	NaN	NaN	NaN	NaN	NaN	NaN	NaN	NaN	NaN	NaN	NaN	NaN	NaN	NaN	NaN	2.8773	NaN	2.0648	2.7987	NaN	NaN	NaN	3.1649	NaN	NaN	NaN	NaN	NaN	NaN	NaN	NaN	NaN	1.6504	NaN	NaN	NaN	NaN	NaN	NaN	NaN	NaN	NaN
NaN	NaN	NaN	NaN	NaN	NaN	NaN	1.4867	NaN	NaN	NaN	NaN	1.6409	NaN	NaN	NaN	NaN	NaN	1.4856	3.3199	NaN	NaN	NaN	2.8773	2.6811	2.0648	NaN	2.8864	NaN	2.0627	3.1649	3.6632	NaN	3.3887	NaN	NaN	NaN	NaN	NaN	NaN	1.6504	1.9005	NaN	NaN	2.6031	2.5752	2.0701	NaN	2.5265	2.6418
NaN	NaN	NaN	NaN	NaN	NaN	NaN	NaN	NaN	NaN	NaN	NaN	NaN	NaN	NaN	NaN	NaN	NaN	NaN	NaN	NaN	NaN	NaN	NaN	NaN	NaN	NaN	NaN	NaN	NaN	NaN	NaN	NaN	NaN	NaN	NaN	NaN	NaN	NaN	NaN	NaN	NaN	NaN	NaN	NaN	NaN	NaN	NaN	NaN	NaN
1.0048	1.105	0.83978	0.84289	0.6603	0.80229	0.66556	0.94347	0.55846	0.5888	0.46788	0.57705	0.58621	0.52248	0.36707	0.27528	0.34869	0.20191	1.383	2.7794	1.0921	0.9516	1.8593	1.7266	1.4819	1.4686	1.316	1.8227	1.4207	1.2216	1.911	1.6269	1.2506	0.66118	0.76519	0.48594	1.2374	1.3894	1.0891	0.84403	0.94284	0.94502	0.83754	1.2144	1.2177	1.1851	0.8522	0.80173	1.0261	0.98566
NaN	NaN	NaN	0.87118	NaN	NaN	NaN	NaN	NaN	NaN	NaN	NaN	NaN	NaN	NaN	NaN	NaN	NaN	NaN	NaN	1.0634	NaN	NaN	NaN	NaN	NaN	NaN	NaN	NaN	NaN	NaN	NaN	NaN	NaN	NaN	NaN	NaN	NaN	NaN	NaN	NaN	NaN	NaN	NaN	NaN	NaN	NaN	NaN	NaN	NaN
0.91889	0.90922	NaN	NaN	0.78263	0.9097	0.69597	0.84049	0.6166	0.74598	0.63903	0.53551	0.32471	0.41138	0.20383	NaN	NaN	0.21666	1.1177	2.2069	NaN	0.73853	NaN	1.2516	1.3716	1.6717	1.6125	1.4391	1.4502	1.3184	1.3406	0.90277	NaN	0.45233	0.27748	NaN	1.2083	1.4273	0.77459	1.1799	1.1014	1.1017	0.90627	0.73538	0.81018	0.95878	0.83861	0.84954	0.70235	0.46923
1.2779	0.79964	0.54562	0.39592	1.067	0.47028	0.47076	0.72632	NaN	0.41271	2.0728	0.63703	1.4966	1.6034	1.3258	NaN	2.3329	0.92357	1.31	0.929	0.7547	0.64295	1.3625	0.96638	4.3986	1.3116	1.2907	1.2022	0.93982	0.93681	1.3142	3.1022	1.0941	1.029	1.0426	0.74969	NaN	NaN	0.46245	0.48009	NaN	0.64541	0.61078	0.5657	0.78037	NaN	NaN	NaN	0.82168	NaN
1.2779	NaN	NaN	NaN	NaN	NaN	NaN	NaN	NaN	NaN	NaN	NaN	NaN	NaN	NaN	NaN	NaN	NaN	NaN	NaN	NaN	NaN	NaN	NaN	4.3986	NaN	NaN	NaN	NaN	NaN	NaN	3.1022	NaN	NaN	NaN	0.74969	0.89609	0.88589	NaN	NaN	0.91241	NaN	NaN	NaN	NaN	0.79021	NaN	NaN	0.82168	0.93232
1.1046	1.3142	0.84888	1.1628	NaN	1.259	1.366	1.414	1.2784	1.4456	1.4232	1.5728	1.588	1.6099	0.96068	0.83413	1.4934	0.87275	1.4201	2.1616	1.1242	0.92841	NaN	3.0568	2.8316	2.3936	3.303	3.1482	2.2884	2.6887	3.2812	3.5598	3.3741	1.9851	1.6536	1.9981	1.2565	1.7963	NaN	1.3422	2.1088	2.0549	1.8432	2.2568	1.9784	2.0484	2.1649	2.9097	2.3611	2.0913
1.1046	0.71113	0.84888	1.1628	0.4899	1.259	1.366	1.414	1.2784	1.4456	0.46463	1.5728	1.588	1.6099	0.96068	0.83413	1.4934	0.87275	1.4201	1.1457	1.1242	0.92841	NaN	3.0568	2.8316	2.3936	0.75171	3.1482	0.53557	2.6887	0.86385	3.5598	3.3741	0.83655	1.6536	0.78795	1.2565	1.7963	NaN	1.3422	0.64274	2.0549	1.8432	2.2568	1.9784	0.46305	2.1649	2.9097	0.83258	2.0913
NaN	NaN	NaN	NaN	NaN	NaN	NaN	NaN	NaN	NaN	NaN	NaN	NaN	NaN	NaN	NaN	NaN	NaN	NaN	NaN	NaN	NaN	NaN	NaN	NaN	NaN	NaN	NaN	NaN	NaN	NaN	NaN	NaN	NaN	NaN	NaN	NaN	NaN	NaN	NaN	NaN	NaN	NaN	NaN	NaN	NaN	NaN	NaN	NaN	NaN
1.0432	NaN	NaN	NaN	NaN	NaN	NaN	NaN	0.54262	0.91612	1.6509	1.8956	1.4619	NaN	0.95996	0.88667	2.3773	1.2022	NaN	NaN	NaN	NaN	NaN	NaN	NaN	NaN	NaN	NaN	NaN	1.9898	2.8729	1.5328	1.7118	NaN	NaN	1.2757	0.51615	NaN	NaN	NaN	NaN	1.3544	1.4301	NaN	1.204	1.3963	0.90767	0.83364	1.5232	1.2644
1.3806	0.79964	0.54562	0.39592	1.067	0.47028	0.47076	0.72632	NaN	0.41271	NaN	0.63703	0.50018	0.43032	0.51081	NaN	0.91666	0.59503	1.31	0.929	0.7547	0.64295	1.3625	0.96638	1.0952	1.3116	1.2907	1.2022	0.93982	0.93681	1.3142	0.90113	1.0941	1.029	1.0426	0.74969	0.89609	0.88589	0.46245	0.48009	0.91241	0.64541	0.61078	0.5657	0.78037	0.79021	NaN	NaN	0.82168	0.93232
NaN	NaN	NaN	NaN	NaN	NaN	NaN	NaN	NaN	NaN	NaN	NaN	NaN	NaN	NaN	NaN	NaN	NaN	NaN	NaN	NaN	NaN	NaN	NaN	NaN	NaN	NaN	NaN	NaN	NaN	NaN	NaN	NaN	NaN	NaN	NaN	NaN	NaN	NaN	0.72994	0.76191	NaN	NaN	NaN	NaN	NaN	NaN	NaN	NaN	NaN
0.96077	0.75861	0.65628	0.54903	0.69807	0.62776	0.52392	0.58126	0.46725	0.5007	0.54259	0.7982	0.67904	0.64838	0.71524	0.71175	1.0537	0.62741	1.0808	1.2632	1.0064	0.74611	1.2956	1.1898	1.1992	1.0076	1.0332	1.2443	0.9739	1.1181	1.2982	1.4948	1.5778	1.8628	1.4987	2.1452	1.161	1.3557	0.78869	0.72994	0.80793	0.77043	0.75688	0.70095	0.67278	0.71497	1.3993	1.1452	1.3162	1.2664
NaN	NaN	NaN	NaN	NaN	NaN	NaN	NaN	NaN	NaN	NaN	NaN	NaN	NaN	NaN	NaN	NaN	NaN	NaN	NaN	NaN	NaN	NaN	NaN	NaN	NaN	NaN	NaN	NaN	NaN	NaN	NaN	NaN	NaN	NaN	NaN	1.0263	NaN	1.6009	1.7403	2.0003	NaN	2.4028	1.5135	NaN	1.7059	1.5997	NaN	NaN	NaN
NaN	NaN	NaN	NaN	NaN	NaN	0.57483	NaN	NaN	NaN	NaN	NaN	NaN	NaN	NaN	NaN	NaN	NaN	NaN	NaN	NaN	NaN	NaN	NaN	NaN	NaN	NaN	NaN	NaN	NaN	NaN	NaN	NaN	NaN	NaN	NaN	NaN	NaN	NaN	NaN	NaN	NaN	NaN	NaN	NaN	NaN	NaN	NaN	NaN	NaN
NaN	NaN	NaN	0.47833	0.72012	0.67902	NaN	NaN	0.39588	0.48558	NaN	0.51863	0.39611	0.21588	NaN	0.12382	NaN	NaN	1.1758	0.96202	1.4479	1.265	1.3081	1.0227	1.2317	1.3421	1.0276	1.0909	NaN	1.1294	0.75065	0.51667	NaN	0.27799	NaN	NaN	0.78511	0.94119	0.78508	NaN	0.77033	0.60682	0.89812	0.56803	NaN	NaN	0.60499	0.58123	NaN	NaN
1.1158	NaN	0.93232	NaN	NaN	NaN	NaN	NaN	NaN	NaN	NaN	NaN	NaN	NaN	NaN	NaN	NaN	NaN	NaN	NaN	NaN	NaN	NaN	NaN	NaN	NaN	NaN	NaN	NaN	NaN	NaN	NaN	NaN	NaN	NaN	NaN	NaN	NaN	NaN	NaN	NaN	NaN	NaN	NaN	NaN	NaN	NaN	NaN	NaN	NaN
NaN	NaN	NaN	NaN	NaN	NaN	NaN	NaN	NaN	NaN	NaN	NaN	NaN	NaN	NaN	NaN	NaN	NaN	NaN	NaN	NaN	NaN	NaN	NaN	NaN	NaN	NaN	NaN	NaN	NaN	NaN	NaN	NaN	NaN	NaN	NaN	NaN	NaN	NaN	NaN	NaN	NaN	NaN	NaN	NaN	NaN	NaN	NaN	NaN	NaN
1.0741	1.0141	0.58767	0.62312	0.64503	0.58623	0.45187	0.4124	0.31827	NaN	0.22225	NaN	NaN	NaN	NaN	NaN	NaN	NaN	1.3477	2.0188	NaN	0.83352	1.3834	1.3501	1.3279	0.83293	1.2882	0.98379	0.68257	NaN	NaN	NaN	NaN	NaN	NaN	NaN	1.1217	1.3572	0.82097	1.0935	0.74779	0.86764	0.64654	0.49666	NaN	NaN	0.4986	NaN	NaN	NaN
0.65781	1.0645	0.64131	0.83352	0.67747	0.9343	0.64206	0.78703	0.72009	0.60411	0.67993	0.48999	0.57839	0.84628	0.48783	NaN	NaN	NaN	0.95645	2.0008	1.0405	1.1149	1.9477	1.9688	1.8751	1.4355	1.679	1.8923	1.4072	1.8076	1.3657	1.587	1.7011	1.2048	NaN	NaN	NaN	NaN	0.72618	1.0883	0.74775	1.0531	1.0823	1.032	0.98979	0.89924	0.97813	1.1791	0.95346	NaN
NaN	0.701	0.62974	0.81204	NaN	NaN	NaN	1.0187	0.99302	0.75425	NaN	1.1956	NaN	0.66647	NaN	0.30469	NaN	NaN	NaN	NaN	0.74117	0.7251	NaN	NaN	NaN	NaN	NaN	NaN	NaN	NaN	NaN	1.1838	0.69737	0.52448	NaN	NaN	1.0289	NaN	0.62507	NaN	NaN	0.84873	NaN	NaN	NaN	NaN	NaN	NaN	NaN	0.71295
NaN	NaN	NaN	NaN	NaN	NaN	NaN	NaN	NaN	NaN	NaN	NaN	NaN	NaN	NaN	NaN	NaN	NaN	1.05	NaN	NaN	NaN	NaN	NaN	NaN	NaN	NaN	NaN	NaN	NaN	NaN	NaN	NaN	NaN	NaN	NaN	NaN	NaN	NaN	NaN	NaN	NaN	NaN	NaN	NaN	NaN	NaN	NaN	NaN	NaN
NaN	1.2048	NaN	NaN	1.2197	0.85256	NaN	0.79182	NaN	NaN	0.89682	NaN	NaN	NaN	NaN	NaN	NaN	NaN	NaN	NaN	NaN	NaN	NaN	NaN	NaN	NaN	NaN	NaN	NaN	NaN	NaN	NaN	NaN	NaN	NaN	NaN	NaN	NaN	NaN	NaN	NaN	NaN	NaN	NaN	NaN	NaN	NaN	NaN	NaN	NaN
NaN	NaN	NaN	NaN	NaN	NaN	NaN	NaN	NaN	NaN	NaN	NaN	NaN	NaN	NaN	NaN	NaN	NaN	NaN	NaN	NaN	NaN	NaN	NaN	NaN	NaN	NaN	NaN	NaN	NaN	NaN	NaN	NaN	NaN	NaN	NaN	NaN	NaN	NaN	NaN	NaN	NaN	NaN	NaN	NaN	NaN	NaN	NaN	NaN	NaN
0.91917	0.97676	1.0001	0.82357	1.1763	0.88235	0.73757	0.92686	0.65316	0.60125	0.81647	0.90303	0.83308	0.74401	0.73429	0.62893	0.88311	0.33856	1.114	1.5204	1.5247	1.4763	1.6794	1.622	1.509	1.8014	1.4668	1.6554	1.7932	1.7335	1.7533	1.683	1.4523	1.5187	1.3807	1.0896	1.0497	0.98993	0.94897	NaN	0.94869	0.9635	0.96643	0.85301	0.93063	0.8255	1.0975	1.2337	1.2059	1.2643
NaN	NaN	NaN	NaN	NaN	NaN	NaN	NaN	NaN	NaN	NaN	NaN	NaN	NaN	NaN	NaN	NaN	NaN	NaN	1.3064	NaN	NaN	NaN	NaN	NaN	NaN	NaN	NaN	NaN	NaN	NaN	NaN	NaN	NaN	NaN	NaN	NaN	1.0862	0.96549	NaN	NaN	0.87627	NaN	1.2656	1.3054	1.0206	NaN	NaN	NaN	NaN
0.9861	NaN	NaN	NaN	0.91832	0.82113	NaN	NaN	NaN	NaN	0.53579	NaN	NaN	NaN	NaN	NaN	NaN	NaN	NaN	NaN	NaN	NaN	NaN	NaN	NaN	1.5753	NaN	NaN	NaN	NaN	NaN	NaN	NaN	NaN	NaN	NaN	NaN	NaN	NaN	NaN	0.83947	NaN	1.3315	NaN	NaN	NaN	NaN	NaN	NaN	NaN
0.96228	0.92511	0.84717	0.39153	1.0338	0.65133	0.56073	0.61938	NaN	0.26146	NaN	0.085138	NaN	NaN	NaN	NaN	NaN	NaN	1.1048	0.96029	1.2695	1.1999	1.2317	1.0047	0.93481	1.2081	0.9901	0.76558	NaN	0.30027	NaN	NaN	NaN	NaN	NaN	NaN	NaN	0.87623	0.90424	0.6943	NaN	0.61462	0.55569	NaN	0.56941	NaN	NaN	NaN	NaN	NaN
0.93102	1.1366	0.78784	NaN	1.0808	NaN	0.36772	NaN	NaN	NaN	NaN	NaN	NaN	NaN	NaN	NaN	NaN	NaN	1.1043	NaN	1.258	0.98873	NaN	1.034	1.1538	1.0587	0.69347	0.95363	0.83019	NaN	NaN	NaN	NaN	NaN	NaN	0.16405	1.0712	0.8945	0.79226	1.1335	0.76631	0.72605	0.69939	0.38978	NaN	NaN	NaN	NaN	NaN	NaN
NaN	NaN	NaN	NaN	NaN	NaN	NaN	NaN	NaN	NaN	NaN	NaN	NaN	NaN	NaN	NaN	NaN	NaN	NaN	NaN	1.2516	0.76554	NaN	NaN	1.0415	1.5808	NaN	0.54733	1.2439	1.0259	NaN	NaN	0.95216	NaN	0.92631	NaN	NaN	NaN	NaN	NaN	NaN	NaN	NaN	NaN	NaN	NaN	NaN	NaN	NaN	NaN
NaN	NaN	NaN	NaN	NaN	NaN	NaN	NaN	NaN	NaN	NaN	NaN	NaN	NaN	NaN	NaN	NaN	NaN	NaN	NaN	NaN	NaN	NaN	NaN	NaN	NaN	NaN	NaN	NaN	NaN	NaN	NaN	NaN	NaN	NaN	NaN	NaN	NaN	NaN	NaN	NaN	NaN	NaN	NaN	NaN	NaN	NaN	NaN	NaN	NaN
NaN	NaN	NaN	NaN	NaN	NaN	NaN	NaN	NaN	NaN	NaN	NaN	NaN	NaN	NaN	NaN	NaN	NaN	NaN	NaN	NaN	NaN	NaN	NaN	NaN	NaN	NaN	NaN	NaN	NaN	NaN	NaN	NaN	NaN	NaN	NaN	NaN	NaN	NaN	NaN	NaN	NaN	NaN	NaN	NaN	NaN	NaN	NaN	NaN	NaN
NaN	NaN	NaN	NaN	NaN	NaN	NaN	NaN	NaN	NaN	NaN	NaN	NaN	NaN	NaN	NaN	NaN	NaN	NaN	NaN	NaN	NaN	NaN	NaN	NaN	NaN	NaN	NaN	NaN	NaN	NaN	NaN	NaN	NaN	NaN	NaN	NaN	NaN	NaN	NaN	NaN	NaN	NaN	NaN	NaN	NaN	NaN	NaN	NaN	NaN
NaN	NaN	NaN	NaN	NaN	NaN	NaN	NaN	NaN	NaN	NaN	NaN	NaN	NaN	NaN	NaN	NaN	NaN	NaN	NaN	NaN	NaN	NaN	NaN	NaN	NaN	NaN	NaN	NaN	NaN	NaN	NaN	NaN	NaN	NaN	NaN	NaN	NaN	NaN	NaN	NaN	NaN	NaN	NaN	NaN	NaN	NaN	NaN	NaN	NaN
1.0619	NaN	NaN	NaN	NaN	NaN	NaN	NaN	NaN	NaN	NaN	NaN	NaN	NaN	NaN	NaN	NaN	NaN	1.2872	1.0029	1.2347	NaN	NaN	2.2894	NaN	2.0455	NaN	NaN	0.49807	NaN	0.14382	NaN	NaN	NaN	NaN	NaN	NaN	NaN	NaN	NaN	NaN	NaN	NaN	NaN	NaN	NaN	NaN	NaN	NaN	NaN
NaN	NaN	NaN	NaN	1.9638	1.2757	0.95666	NaN	NaN	NaN	NaN	NaN	NaN	NaN	NaN	NaN	NaN	NaN	NaN	0.57577	NaN	3.21	NaN	NaN	NaN	NaN	NaN	0.87731	NaN	NaN	NaN	NaN	NaN	NaN	NaN	NaN	1.1452	NaN	NaN	1.7047	NaN	NaN	NaN	1.2731	NaN	NaN	NaN	NaN	NaN	NaN
NaN	1.2239	NaN	NaN	NaN	NaN	NaN	NaN	NaN	NaN	NaN	NaN	NaN	NaN	NaN	NaN	NaN	NaN	NaN	NaN	NaN	NaN	NaN	NaN	NaN	NaN	NaN	NaN	NaN	NaN	NaN	NaN	NaN	NaN	NaN	NaN	NaN	NaN	NaN	NaN	NaN	NaN	NaN	NaN	NaN	NaN	NaN	NaN	NaN	NaN
NaN	NaN	NaN	NaN	NaN	NaN	NaN	NaN	NaN	NaN	NaN	NaN	NaN	NaN	NaN	NaN	NaN	NaN	NaN	NaN	NaN	NaN	NaN	NaN	NaN	NaN	NaN	NaN	NaN	NaN	NaN	NaN	NaN	NaN	NaN	NaN	NaN	NaN	NaN	NaN	NaN	NaN	0.75855	NaN	NaN	NaN	NaN	NaN	NaN	NaN
1.0195	1.1079	0.78089	0.84618	0.88679	0.81504	0.67691	0.68321	0.49184	0.3455	0.33986	0.097483	0.03102	0.03561	NaN	NaN	0.025816	NaN	1.2292	1.6433	1.6357	1.8274	1.8172	1.7793	1.6893	1.4543	1.4834	1.4159	1.2121	0.41385	0.16899	0.066535	0.03017	0.29297	NaN	NaN	1.042	1.106	0.8566	0.85522	1.0052	0.9752	0.80197	0.64377	0.47532	0.33308	0.37365	0.078042	NaN	NaN
1.1969	1.1756	0.99872	0.88	1.0951	1.2819	1.1651	1.0564	0.86195	0.82267	0.94333	0.85876	0.70013	0.80358	0.61972	0.65541	0.91107	0.47197	1.2773	1.8157	1.0402	1.4862	NaN	2.6735	2.2897	2.668	2.3962	2.0171	1.8988	1.9767	1.8962	1.5299	1.1825	1.3731	0.85668	0.91013	1.0238	1.2246	0.89405	1.2077	1.2043	1.3889	1.0576	1.1734	1.4492	1.1028	1.1959	1.0979	0.88323	0.99945
0.98946	0.94501	0.87721	0.71529	0.81888	0.85137	0.78806	0.92411	0.66034	0.70758	0.80707	0.81756	0.7033	0.7537	0.62944	0.45701	0.85873	0.40243	1.1428	1.4519	1.2271	1.3342	1.45	1.4294	1.3774	1.336	1.2338	1.4579	1.5199	1.5885	1.3379	1.3893	1.277	1.1993	1.1493	0.90091	1.02	1.0906	0.91319	0.88953	0.98686	0.94725	0.95578	0.82895	0.79117	0.71392	0.9704	1.0209	0.95046	1.0579
1.0883	1.0316	1.0042	0.80641	0.83797	0.8699	0.92614	0.81387	0.87226	0.75831	0.88044	0.90907	0.94049	0.66856	0.92866	0.73634	NaN	0.472	1.4149	NaN	1.525	1.8898	1.353	1.5331	1.3571	1.247	1.6063	1.7225	NaN	1.9151	1.7779	1.4528	1.7537	1.9887	1.6917	1.3496	1.0163	NaN	0.89576	1.0036	0.94519	1.0013	0.90322	0.99098	0.84779	0.94402	1.3191	1.3886	1.1082	1.1675
NaN	NaN	NaN	NaN	NaN	NaN	NaN	NaN	NaN	NaN	NaN	NaN	NaN	NaN	NaN	NaN	NaN	NaN	NaN	1.4222	NaN	NaN	NaN	NaN	NaN	NaN	NaN	NaN	NaN	NaN	NaN	NaN	NaN	NaN	NaN	NaN	NaN	NaN	NaN	NaN	NaN	NaN	NaN	NaN	NaN	NaN	NaN	NaN	NaN	NaN
1.0396	1.4236	0.76174	0.9408	1.0353	1.1194	0.88036	1.1503	0.79971	0.93642	0.9679	0.80648	0.88471	0.93679	0.80161	0.59497	1.0463	NaN	1.4622	1.8533	0.91898	1.0452	1.9684	1.4317	2.3564	NaN	NaN	NaN	NaN	NaN	NaN	NaN	NaN	NaN	NaN	NaN	1.1399	1.5323	1.2155	1.05	NaN	1.574	0.90022	1.1724	1.1172	1.1146	1.5552	0.93186	1.5399	1.3243
NaN	NaN	NaN	NaN	NaN	NaN	1.1454	NaN	NaN	NaN	NaN	NaN	NaN	NaN	NaN	NaN	NaN	NaN	NaN	NaN	NaN	NaN	NaN	NaN	NaN	NaN	NaN	NaN	NaN	NaN	NaN	NaN	NaN	NaN	NaN	NaN	NaN	NaN	NaN	NaN	NaN	NaN	NaN	NaN	NaN	NaN	NaN	NaN	NaN	NaN
1.4636	1.5851	NaN	1.0976	NaN	NaN	NaN	1.3354	0.70669	1.4604	0.89423	1.7214	NaN	NaN	0.79319	0.38607	0.67686	NaN	1.4835	NaN	2.303	1.4253	2.1228	NaN	1.8035	2.6595	2.7715	3.0538	1.4196	2.8763	2.1963	1.5783	1.5701	1.2782	0.83158	NaN	0.79504	1.1138	1.2181	1.3343	1.3288	1.2174	NaN	0.82401	NaN	1.151	1.8114	1.2223	NaN	0.9729
NaN	NaN	NaN	NaN	NaN	NaN	NaN	NaN	NaN	0.67337	NaN	NaN	NaN	NaN	NaN	NaN	NaN	NaN	NaN	NaN	NaN	NaN	NaN	NaN	NaN	NaN	NaN	NaN	NaN	NaN	NaN	NaN	NaN	NaN	NaN	NaN	NaN	NaN	NaN	NaN	NaN	NaN	NaN	NaN	NaN	NaN	NaN	NaN	NaN	NaN
NaN	NaN	NaN	NaN	1.2344	NaN	NaN	NaN	NaN	NaN	NaN	NaN	NaN	NaN	NaN	NaN	NaN	NaN	NaN	NaN	NaN	NaN	NaN	1.9685	NaN	NaN	NaN	NaN	1.9267	NaN	NaN	NaN	NaN	1.9567	NaN	NaN	NaN	NaN	NaN	NaN	NaN	NaN	NaN	NaN	NaN	NaN	NaN	NaN	NaN	NaN
0.98123	1.1814	0.66981	0.3698	0.63895	0.65012	0.74041	0.69511	NaN	NaN	0.66681	NaN	NaN	NaN	NaN	NaN	NaN	NaN	NaN	NaN	NaN	NaN	NaN	NaN	1.1081	NaN	1.0435	1.0123	1.2356	0.89746	0.69042	NaN	NaN	NaN	NaN	NaN	NaN	NaN	0.60215	NaN	0.87681	0.82564	0.84668	NaN	0.8285	NaN	0.94595	0.55734	NaN	NaN
1.0859	1.0447	0.96548	0.79075	0.84224	0.94943	0.74356	0.93686	0.58518	0.82143	0.85196	0.85965	0.69349	0.60134	0.51879	0.52591	1.1356	0.63473	1.2853	1.4167	1.5515	NaN	NaN	1.4071	1.7121	NaN	1.2676	1.9724	1.5983	2.0929	1.7864	1.0193	NaN	1.1703	1.329	NaN	1.1524	NaN	1.6403	0.88509	0.94722	NaN	1.0385	1.3532	0.66089	1.0134	1.0536	0.99633	NaN	1.2196
NaN	NaN	NaN	NaN	NaN	NaN	NaN	NaN	NaN	NaN	NaN	NaN	NaN	NaN	NaN	NaN	NaN	NaN	NaN	NaN	NaN	NaN	NaN	NaN	NaN	NaN	NaN	NaN	NaN	NaN	NaN	1.9098	NaN	NaN	NaN	NaN	NaN	NaN	NaN	NaN	NaN	NaN	NaN	NaN	NaN	NaN	NaN	NaN	0.83208	NaN
NaN	NaN	NaN	NaN	NaN	NaN	NaN	NaN	NaN	NaN	NaN	NaN	NaN	NaN	NaN	NaN	NaN	NaN	NaN	NaN	NaN	NaN	NaN	NaN	NaN	NaN	NaN	NaN	NaN	NaN	NaN	NaN	NaN	NaN	NaN	NaN	NaN	NaN	NaN	NaN	NaN	NaN	NaN	NaN	NaN	NaN	NaN	NaN	NaN	NaN
NaN	NaN	NaN	NaN	NaN	NaN	0.73703	NaN	NaN	NaN	0.4958	0.54457	NaN	NaN	NaN	NaN	NaN	0.17091	NaN	1.1225	NaN	1.2675	1.3318	NaN	NaN	1.2342	NaN	NaN	1.6595	NaN	NaN	NaN	NaN	NaN	NaN	NaN	NaN	NaN	1.1903	NaN	NaN	NaN	NaN	NaN	NaN	NaN	NaN	0.79654	NaN	NaN
NaN	NaN	NaN	NaN	NaN	NaN	NaN	NaN	NaN	NaN	NaN	NaN	NaN	NaN	NaN	NaN	NaN	NaN	NaN	1.0735	1.6978	1.5968	NaN	1.0191	1.2246	1.6089	NaN	1.0097	1.5513	1.2128	0.97286	0.59696	0.63198	0.5099	0.44016	0.28531	NaN	NaN	NaN	NaN	0.72789	NaN	NaN	NaN	NaN	NaN	NaN	NaN	NaN	NaN
NaN	NaN	0.62293	NaN	NaN	NaN	NaN	NaN	NaN	0.75543	NaN	NaN	NaN	0.88883	NaN	NaN	NaN	NaN	NaN	NaN	NaN	NaN	NaN	NaN	NaN	NaN	NaN	NaN	NaN	NaN	1.907	NaN	NaN	NaN	NaN	NaN	NaN	NaN	0.82512	NaN	NaN	NaN	NaN	NaN	0.87538	1.1627	1.0144	NaN	NaN	NaN
NaN	1.376	NaN	0.67735	NaN	0.83393	NaN	NaN	0.74446	NaN	NaN	NaN	NaN	NaN	NaN	0.74573	NaN	0.62902	1.3077	NaN	NaN	0.98242	1.8802	1.8843	1.6017	1.5565	NaN	1.9303	1.5138	1.6578	NaN	1.7688	1.6575	1.918	1.288	NaN	0.96242	1.233	NaN	1.1724	NaN	NaN	0.8992	NaN	NaN	NaN	NaN	1.3861	1.1276	NaN
NaN	1.8943	1.5622	2.3943	1.4438	1.4769	1.3331	2.1843	1.3732	1.045	1.2548	1.0494	1.2097	0.82508	0.96399	1.1709	1.1862	NaN	1.1284	2.811	1.3311	1.3507	NaN	2.2373	2.8778	1.9539	3.0609	2.101	2.3156	2.1162	2.1534	1.3889	2.3896	1.2833	NaN	1.075	1.0498	1.3385	1.4629	1.6007	1.2266	1.9381	1.6086	1.9541	2.0146	1.5416	1.1075	1.4382	1.5942	NaN
NaN	NaN	NaN	NaN	NaN	NaN	NaN	NaN	NaN	NaN	NaN	NaN	NaN	NaN	NaN	NaN	NaN	NaN	NaN	1.2281	1.4151	NaN	NaN	NaN	NaN	NaN	NaN	NaN	NaN	NaN	NaN	NaN	NaN	NaN	NaN	NaN	NaN	0.85928	NaN	NaN	0.72377	0.77447	NaN	NaN	NaN	NaN	NaN	NaN	NaN	NaN
0.93384	0.80568	0.6197	0.4912	0.52916	0.44778	0.37982	0.26305	NaN	0.086885	0.063754	NaN	NaN	NaN	NaN	NaN	NaN	NaN	1.2553	NaN	NaN	NaN	1.223	1.1284	0.90731	0.92422	0.86031	0.49596	0.41827	0.10787	NaN	NaN	NaN	NaN	NaN	NaN	1.1514	NaN	0.91931	0.72309	NaN	0.77447	NaN	0.39413	0.22268	0.06284	0.10141	NaN	NaN	NaN
0.82945	0.97393	1.0367	0.58973	0.89067	0.80538	NaN	0.7708	0.6418	2.4128	NaN	0.9525	NaN	6.8769	7.2793	NaN	NaN	0.64007	NaN	NaN	1.3046	1.1851	1.8497	1.1298	1.2327	1.42	1.3199	1.5897	NaN	NaN	NaN	NaN	NaN	NaN	NaN	NaN	NaN	NaN	NaN	1.1838	0.90752	0.83906	NaN	0.72442	NaN	0.87369	1.0805	1.3443	NaN	NaN
0.78527	0.94006	0.99901	0.69134	0.76516	NaN	1.0292	0.64482	0.47516	0.35774	NaN	NaN	NaN	NaN	NaN	NaN	NaN	NaN	1.2397	1.4031	1.0301	1.4477	NaN	1.004	1.4147	NaN	1.2565	1.0486	0.87043	NaN	NaN	NaN	NaN	NaN	NaN	NaN	1.1046	NaN	1.04	0.8698	1.2712	0.78722	0.71766	0.72997	0.363	NaN	NaN	NaN	NaN	NaN
0.98471	0.83458	0.90997	NaN	1.0028	0.55826	0.58388	0.72901	0.66336	0.58068	0.78808	0.71705	0.60498	0.50235	0.50755	NaN	0.4264	NaN	1.0212	NaN	1.0273	NaN	NaN	1.8014	NaN	1.1578	1.5453	1.5474	1.2385	NaN	1.4613	1.6451	1.4352	0.69527	0.99019	1.1482	0.95998	1.0388	0.7609	0.94759	0.9626	0.84822	0.7873	0.9076	0.87784	NaN	0.60281	0.95053	0.91375	0.90906
1.0465	1.1703	0.92351	NaN	0.77471	1.0174	0.5943	0.89892	0.71854	0.65169	0.78973	0.70996	0.62158	0.32384	0.38764	NaN	1.3179	NaN	1.4433	1.9142	1.6181	1.3197	1.4054	NaN	1.6039	2.1348	1.4789	1.7007	1.6806	1.4896	1.5468	1.2612	1.5118	1.02	0.86719	0.80877	1.1576	1.274	0.89483	0.85899	1.0391	0.9752	1.1538	0.87526	0.79638	0.71016	0.79315	0.67346	0.6116	0.72555
NaN	NaN	NaN	NaN	NaN	NaN	NaN	NaN	NaN	0.62853	NaN	NaN	NaN	NaN	NaN	NaN	NaN	NaN	1.3292	1.882	0.93643	0.71174	1.9307	1.5726	1.5904	0.6394	1.6642	1.4636	0.86758	0.74559	0.1919	NaN	0.5307	0.087915	0.26421	0.2443	NaN	NaN	NaN	NaN	NaN	NaN	NaN	NaN	NaN	NaN	NaN	0.69173	NaN	0.40365
NaN	NaN	NaN	0.2485	NaN	0.65224	0.83828	NaN	NaN	NaN	NaN	NaN	NaN	NaN	0.16238	NaN	NaN	NaN	NaN	NaN	2.3775	NaN	NaN	NaN	0.9094	NaN	NaN	NaN	NaN	NaN	0.9819	0.81334	0.12677	0.37173	NaN	NaN	NaN	NaN	NaN	NaN	NaN	NaN	NaN	0.7548	0.77731	NaN	NaN	0.070011	NaN	NaN
0.9529	1.1811	1.0033	0.82232	1.0164	0.8886	0.79907	0.67661	0.27398	0.22738	0.62191	0.46057	0.19033	0.15748	0.21104	0.10672	0.17688	0.068359	1.2251	0.74053	0.95136	1.2401	2.0747	0.55897	1.632	1.5452	1.774	1.0234	1.2553	1.2152	0.44223	0.75147	0.53764	0.15955	0.21882	0.2101	0.95794	1.4207	1.5108	0.92024	0.51256	1.0445	0.95204	0.91536	0.85563	0.25528	0.51972	0.19837	0.16616	0.14509
0.99404	1.0693	1.02	0.7143	0.71442	0.90358	0.75414	0.68173	0.50131	0.41667	0.43306	0.39587	0.50117	0.31998	0.35714	0.19987	0.32314	0.16557	1.1594	1.3591	1.2974	1.3625	1.5718	1.648	1.6344	1.3248	1.3324	1.2919	1.3531	0.85154	0.66699	0.57568	0.69896	0.58427	0.50127	0.35915	0.94585	1.0542	1.0509	0.9386	0.80652	0.96889	0.89573	0.80219	0.55797	0.47579	0.54977	0.50141	0.40415	0.48974
NaN	NaN	NaN	NaN	NaN	NaN	NaN	NaN	NaN	NaN	NaN	NaN	NaN	NaN	NaN	NaN	NaN	NaN	NaN	NaN	NaN	NaN	NaN	NaN	NaN	NaN	NaN	NaN	NaN	NaN	NaN	NaN	NaN	NaN	NaN	NaN	NaN	NaN	NaN	NaN	NaN	NaN	NaN	NaN	NaN	NaN	NaN	NaN	NaN	NaN
0.85214	1.2448	1.213	0.88155	1.0695	1.0923	1.0145	1.0472	0.74463	0.84078	0.83569	0.87588	0.89974	0.66153	0.66655	NaN	0.62644	0.31677	1.355	1.7315	NaN	1.5741	1.6577	1.6664	2.0487	1.5426	1.5294	1.4376	1.6768	1.6737	1.6159	1.4106	1.3524	0.9844	0.89141	0.72369	1.0348	1.2833	1.0823	1.0311	0.97799	1.1266	1.4722	1.4058	1.1568	1.145	0.92711	1.0501	1.2471	1.1901
1.0169	1.1504	0.556	0.75275	0.77066	0.85088	0.71339	0.76065	0.61853	NaN	0.66052	0.69188	0.57352	NaN	NaN	NaN	0.5046	NaN	NaN	NaN	0.90987	0.83418	1.936	NaN	1.3948	1.5748	1.2926	1.4136	0.81066	1.1269	1.1924	NaN	1.1106	1.2194	NaN	NaN	1.1725	1.3171	0.7971	0.85099	0.98165	0.97278	0.64409	0.62528	0.68953	0.67767	0.74959	0.86199	0.83818	0.9881
NaN	NaN	NaN	NaN	NaN	NaN	NaN	NaN	NaN	NaN	NaN	NaN	NaN	NaN	NaN	NaN	NaN	NaN	NaN	NaN	NaN	NaN	NaN	NaN	NaN	NaN	NaN	NaN	NaN	NaN	NaN	NaN	NaN	NaN	NaN	NaN	NaN	NaN	NaN	NaN	NaN	NaN	NaN	NaN	NaN	NaN	NaN	NaN	NaN	NaN
1.0034	0.99183	0.9148	0.7099	0.91182	0.75445	0.76695	0.79984	0.63943	0.65054	0.69313	0.6505	0.54352	0.42451	0.39373	0.13902	0.28105	0.090521	1.0715	1.6132	1.1851	1.5311	1.4456	1.4172	1.5215	1.2511	1.2198	1.5185	1.6408	1.393	1.057	0.95775	0.77027	0.65013	0.40096	0.35967	0.97884	1.0635	0.97378	0.8814	0.8435	0.91882	1.0498	0.75441	0.74124	0.78074	0.91847	0.85106	0.66894	0.60156
NaN	NaN	NaN	NaN	NaN	NaN	NaN	NaN	NaN	NaN	NaN	NaN	NaN	NaN	NaN	NaN	NaN	NaN	NaN	NaN	NaN	NaN	NaN	NaN	NaN	NaN	NaN	NaN	NaN	NaN	NaN	NaN	NaN	0.61166	NaN	NaN	NaN	NaN	NaN	NaN	NaN	NaN	NaN	NaN	NaN	NaN	NaN	NaN	NaN	NaN
0.87336	1.7643	1.0852	1.244	1.2751	1.5662	1.0338	1.4571	0.97507	1.2303	1.1616	1.4597	1.2944	1.3459	1.1348	0.90035	1.5957	1.1607	1.3716	2.7126	1.5746	1.1714	2.4746	2.3924	2.4801	2.5971	2.4776	2.8008	2.003	2.6816	2.7556	2.5886	2.5837	2.8503	1.8014	2.3599	1.2153	2.0862	1.3658	1.3204	1.5831	1.7736	1.4114	1.6947	1.5447	1.6269	1.8883	2.0207	2.1571	2.2119
0.88011	1.5147	1.072	1.0675	1.1674	1.3017	0.93805	1.4715	1.0503	1.1278	1.0255	1.2517	1.238	1.0592	0.90639	0.55426	0.9175	0.58776	1.3774	2.1088	1.2957	1.2646	2.092	2.1089	2.3539	2.1019	2.564	2.3909	1.6795	2.2768	2.6224	2.1646	1.8908	1.8063	1.1666	1.3237	0.92708	1.461	1.2659	1.2475	1.7515	1.6003	1.3763	1.4268	1.5353	1.6193	1.6712	1.4813	1.8738	NaN
0.80314	1.2583	0.85742	0.67081	0.97363	0.9922	1.0572	1.0935	0.70854	1.125	1.0995	1.0782	1.0218	0.96175	1.0031	0.91374	1.8514	1.151	1.3576	1.2954	1.3309	0.97474	2.1148	1.5203	1.9952	1.8269	1.878	1.8303	1.6115	1.7729	2.0443	1.5296	1.7451	1.996	1.781	2.3191	0.94964	NaN	0.92506	1.0228	1.1723	1.1755	0.96348	1.0156	0.96686	1.1839	1.2963	1.2656	1.4784	1.9216
NaN	NaN	NaN	NaN	NaN	NaN	NaN	NaN	NaN	NaN	NaN	NaN	NaN	NaN	NaN	NaN	NaN	NaN	1.1345	NaN	NaN	NaN	NaN	0.91993	1.2688	1.921	1.0362	1.8161	1.5879	1.2094	NaN	1.5113	1.2316	NaN	0.77167	NaN	1.1759	NaN	NaN	NaN	NaN	NaN	NaN	0.70099	NaN	NaN	NaN	NaN	NaN	NaN
1.043	0.97452	0.84495	0.65024	0.72685	0.84131	0.61457	0.52222	0.40322	0.39341	0.37741	0.23756	0.1572	0.16593	0.19608	0.12758	0.22744	0.095951	1.2079	1.4353	1.5402	1.4306	1.4223	1.452	1.2022	1.1968	1.2452	1.0742	1.0992	0.7468	0.37512	0.3281	0.29729	0.32196	0.35811	0.32175	1.0368	0.97053	1.0889	0.9821	0.9993	1.0625	0.96286	0.69264	0.69251	0.58775	0.58596	0.28749	0.23084	0.26143
1.1651	NaN	0.92793	0.76836	0.86548	0.92132	0.81144	0.91886	0.70864	0.82654	0.85497	0.87263	0.83298	0.95295	0.82671	0.54367	1.2181	0.51232	1.6972	1.4078	1.1995	1.482	NaN	1.9137	1.2615	1.77	1.2142	1.5911	2.163	1.7381	1.5817	1.3877	1.4877	1.5816	1.1919	1.4214	0.99218	1.1101	1.042	1.0572	1.0784	1.1355	1.158	0.82407	0.92011	0.99947	1.015	1.0868	1.1864	1.045
NaN	NaN	NaN	NaN	NaN	NaN	NaN	NaN	NaN	NaN	NaN	NaN	NaN	NaN	NaN	NaN	NaN	NaN	1.7413	NaN	NaN	NaN	NaN	NaN	NaN	NaN	NaN	NaN	NaN	NaN	NaN	NaN	NaN	NaN	NaN	NaN	1.615	1.9813	NaN	NaN	NaN	NaN	NaN	NaN	NaN	NaN	NaN	NaN	NaN	NaN
1.0082	0.95691	0.65912	0.54858	1.0317	0.87954	0.87152	NaN	0.36637	0.38571	0.44861	NaN	0.081558	NaN	NaN	NaN	NaN	NaN	NaN	NaN	NaN	NaN	NaN	NaN	NaN	NaN	NaN	NaN	NaN	NaN	NaN	NaN	NaN	NaN	NaN	NaN	0.96982	1.0688	NaN	NaN	0.94128	0.79881	0.8316	NaN	0.51325	0.55629	0.39691	NaN	NaN	NaN
NaN	NaN	NaN	NaN	NaN	NaN	NaN	NaN	NaN	NaN	NaN	NaN	NaN	NaN	NaN	NaN	NaN	NaN	NaN	NaN	NaN	NaN	NaN	NaN	NaN	NaN	NaN	NaN	NaN	NaN	NaN	NaN	NaN	NaN	NaN	NaN	NaN	NaN	0.82783	0.94787	NaN	NaN	NaN	NaN	NaN	NaN	NaN	NaN	NaN	NaN
0.82041	1.0545	0.6743	NaN	NaN	NaN	0.86365	0.87795	0.8194	0.83361	NaN	NaN	NaN	NaN	0.93051	0.72942	1.0007	NaN	0.94505	NaN	NaN	0.77075	NaN	NaN	NaN	1.7021	1.5526	NaN	NaN	1.1237	0.95952	NaN	NaN	NaN	NaN	NaN	0.67941	NaN	NaN	NaN	NaN	0.92641	0.70486	NaN	0.61592	NaN	NaN	NaN	0.84441	NaN
1.0883	NaN	0.69123	NaN	0.8516	NaN	NaN	NaN	NaN	NaN	NaN	NaN	NaN	NaN	0.94731	NaN	NaN	NaN	NaN	NaN	NaN	NaN	NaN	NaN	NaN	NaN	NaN	NaN	NaN	NaN	NaN	NaN	NaN	NaN	NaN	NaN	NaN	NaN	NaN	NaN	NaN	NaN	NaN	NaN	NaN	NaN	NaN	NaN	NaN	NaN
NaN	0.22153	1.4596	NaN	0.8516	0.60618	0.70774	0.36779	NaN	NaN	0.52072	0.57928	0.31565	NaN	0.68892	0.35844	0.81259	NaN	1.1611	NaN	2.5837	2.9176	NaN	NaN	0.78232	0.5656	0.30636	0.52305	2.0881	1.26	0.39495	NaN	0.33524	NaN	2.157	0.36063	0.9077	NaN	1.6793	0.68199	0.29663	NaN	NaN	0.61228	NaN	NaN	NaN	NaN	NaN	NaN
NaN	NaN	NaN	NaN	NaN	NaN	NaN	NaN	NaN	NaN	NaN	NaN	NaN	NaN	NaN	NaN	NaN	NaN	NaN	NaN	NaN	NaN	NaN	NaN	NaN	NaN	NaN	NaN	NaN	NaN	NaN	NaN	NaN	NaN	NaN	NaN	NaN	NaN	NaN	NaN	NaN	NaN	NaN	NaN	NaN	NaN	NaN	NaN	NaN	NaN
NaN	NaN	NaN	NaN	NaN	NaN	NaN	NaN	NaN	NaN	NaN	NaN	NaN	NaN	NaN	NaN	NaN	NaN	NaN	NaN	NaN	NaN	NaN	NaN	NaN	NaN	NaN	NaN	NaN	NaN	NaN	NaN	NaN	NaN	NaN	NaN	NaN	NaN	NaN	NaN	NaN	NaN	NaN	NaN	NaN	NaN	NaN	NaN	NaN	NaN
NaN	1.0009	NaN	NaN	0.85133	NaN	NaN	NaN	NaN	NaN	NaN	0.82182	NaN	NaN	NaN	NaN	NaN	NaN	NaN	NaN	NaN	1.1879	NaN	NaN	NaN	NaN	1.4984	NaN	NaN	1.4053	NaN	NaN	NaN	NaN	1.0196	NaN	NaN	NaN	NaN	NaN	1.0023	NaN	NaN	NaN	0.96563	NaN	NaN	NaN	NaN	NaN
NaN	NaN	NaN	NaN	NaN	NaN	NaN	NaN	NaN	NaN	NaN	NaN	NaN	NaN	NaN	NaN	NaN	NaN	NaN	NaN	NaN	NaN	NaN	NaN	NaN	NaN	NaN	NaN	NaN	NaN	NaN	NaN	NaN	NaN	NaN	NaN	NaN	NaN	NaN	NaN	NaN	NaN	NaN	NaN	NaN	NaN	NaN	NaN	NaN	NaN
0.77792	1.0009	NaN	NaN	0.85133	NaN	NaN	NaN	NaN	NaN	NaN	0.82182	NaN	NaN	NaN	NaN	NaN	NaN	NaN	1.2517	NaN	NaN	1.4192	NaN	NaN	1.3064	1.4984	NaN	NaN	NaN	1.6131	1.2097	NaN	NaN	NaN	0.91272	NaN	NaN	NaN	NaN	NaN	NaN	NaN	NaN	NaN	NaN	1.1316	NaN	NaN	NaN
NaN	NaN	0.90101	NaN	NaN	0.88245	NaN	NaN	NaN	NaN	NaN	NaN	NaN	NaN	NaN	NaN	NaN	NaN	NaN	NaN	1.2732	1.1879	NaN	NaN	NaN	NaN	NaN	NaN	NaN	1.4053	NaN	NaN	NaN	NaN	1.0196	NaN	1.0109	1.1251	1.0998	NaN	1.0023	NaN	1.0042	0.9685	0.96563	NaN	NaN	NaN	NaN	1.1613
NaN	1.1147	NaN	NaN	NaN	NaN	NaN	NaN	NaN	0.40895	NaN	NaN	NaN	NaN	NaN	NaN	NaN	NaN	1.301	NaN	NaN	NaN	NaN	NaN	NaN	NaN	NaN	NaN	NaN	NaN	NaN	NaN	NaN	NaN	NaN	NaN	0.91996	NaN	0.8454	NaN	NaN	0.80144	0.42732	0.62445	NaN	0.4644	NaN	NaN	NaN	NaN
NaN	NaN	NaN	NaN	NaN	NaN	NaN	NaN	NaN	NaN	NaN	NaN	NaN	NaN	NaN	NaN	NaN	NaN	NaN	NaN	NaN	NaN	NaN	NaN	NaN	NaN	NaN	NaN	NaN	NaN	NaN	NaN	NaN	NaN	NaN	NaN	NaN	NaN	NaN	NaN	NaN	NaN	NaN	NaN	NaN	NaN	NaN	NaN	NaN	NaN
1.137	1.1862	0.58298	0.67329	0.85434	0.96835	0.72657	0.96645	0.82792	0.75091	0.75941	0.86431	0.59636	0.47936	0.35016	0.1805	0.42056	0.20066	1.3058	2.0359	0.90483	0.64662	1.8485	1.9783	1.6314	1.7336	1.9094	1.7053	1.3605	1.5418	1.7369	1.3564	1.1471	0.7976	0.50868	0.66099	1.0964	1.3024	0.60523	1.0319	0.95051	1.1908	0.70828	0.80253	0.9499	1.0281	0.91246	1.0076	1.0142	0.91663
NaN	NaN	NaN	NaN	NaN	NaN	NaN	NaN	NaN	NaN	NaN	NaN	NaN	NaN	NaN	NaN	NaN	NaN	NaN	NaN	NaN	NaN	NaN	NaN	NaN	NaN	1.9667	1.896	NaN	NaN	NaN	NaN	NaN	NaN	NaN	NaN	NaN	NaN	NaN	0.75338	NaN	0.53819	NaN	0.45196	NaN	NaN	NaN	NaN	NaN	NaN
NaN	NaN	NaN	NaN	NaN	NaN	NaN	NaN	NaN	NaN	NaN	NaN	NaN	NaN	NaN	NaN	NaN	NaN	NaN	1.2844	1.6088	1.3803	1.5854	1.3703	1.5294	1.3597	NaN	NaN	1.7394	1.7049	NaN	1.355	NaN	1.6139	1.7914	NaN	NaN	NaN	NaN	NaN	NaN	NaN	NaN	NaN	NaN	NaN	NaN	NaN	NaN	NaN
NaN	NaN	NaN	NaN	NaN	NaN	NaN	NaN	NaN	NaN	NaN	NaN	NaN	NaN	NaN	NaN	NaN	NaN	NaN	NaN	NaN	NaN	NaN	NaN	NaN	NaN	NaN	NaN	NaN	NaN	NaN	NaN	NaN	NaN	NaN	NaN	NaN	NaN	NaN	NaN	NaN	NaN	NaN	NaN	NaN	NaN	NaN	NaN	NaN	NaN
NaN	1.3488	NaN	NaN	NaN	NaN	NaN	NaN	0.63881	0.52056	1.4252	1.5187	0.99199	0.82733	0.65332	0.83976	1.3857	1.0846	NaN	NaN	NaN	NaN	NaN	NaN	NaN	1.9232	NaN	NaN	NaN	NaN	NaN	NaN	NaN	NaN	NaN	1.7448	NaN	NaN	NaN	NaN	NaN	NaN	NaN	NaN	NaN	NaN	NaN	NaN	NaN	NaN
NaN	NaN	NaN	NaN	NaN	NaN	NaN	NaN	NaN	NaN	NaN	NaN	NaN	NaN	NaN	NaN	NaN	NaN	NaN	NaN	NaN	NaN	0.74348	NaN	NaN	NaN	NaN	NaN	NaN	NaN	NaN	NaN	NaN	NaN	NaN	NaN	NaN	NaN	NaN	NaN	NaN	NaN	NaN	NaN	NaN	NaN	NaN	NaN	NaN	NaN
NaN	NaN	NaN	NaN	NaN	NaN	NaN	NaN	NaN	NaN	NaN	NaN	NaN	NaN	NaN	NaN	NaN	NaN	NaN	NaN	NaN	NaN	NaN	NaN	NaN	NaN	NaN	NaN	NaN	NaN	NaN	NaN	NaN	NaN	NaN	NaN	NaN	NaN	NaN	NaN	NaN	NaN	NaN	NaN	NaN	NaN	NaN	NaN	NaN	NaN
NaN	NaN	NaN	NaN	NaN	NaN	NaN	0.92172	NaN	NaN	NaN	0.49041	0.80773	0.62004	0.37358	0.39228	NaN	0.36585	NaN	NaN	NaN	NaN	NaN	NaN	NaN	NaN	NaN	NaN	NaN	NaN	NaN	NaN	NaN	NaN	NaN	NaN	NaN	NaN	NaN	NaN	NaN	NaN	NaN	NaN	NaN	NaN	NaN	NaN	NaN	NaN
1.0568	1.0551	0.75412	0.69987	0.75268	0.89382	0.74205	0.90335	0.68478	0.68388	0.83753	0.74882	0.74565	0.95596	0.71801	0.60126	1.063	0.42594	1.1783	1.6113	1.3048	1.4521	1.6743	1.3743	1.5157	1.5659	1.6457	1.5383	1.6844	1.4928	1.7652	1.5324	1.7111	1.6341	1.5099	1.0926	0.92552	1.1993	0.98671	0.91554	0.96319	1.0182	1.0005	0.85587	0.91153	0.6688	0.96706	0.93277	1.1861	1.3749
1.0102	1.0906	1.1546	0.96799	0.98096	0.78453	0.72714	0.79549	0.84528	0.66621	0.73632	0.53786	0.62849	0.61258	0.47507	0.24589	0.39989	0.12332	1.2826	1.1829	1.1804	1.1367	1.6589	1.2941	1.4558	1.5812	1.5945	1.4897	1.6465	1.3342	1.3189	1.1225	0.97127	0.64241	0.61013	0.35657	1.1377	1.0951	0.88896	0.99413	1.2322	0.92594	1.1967	0.94928	0.92664	0.81246	0.77976	0.98515	1.0903	0.8231
NaN	NaN	NaN	NaN	0.51117	NaN	NaN	NaN	NaN	NaN	NaN	NaN	NaN	NaN	NaN	NaN	NaN	NaN	1.0767	NaN	NaN	NaN	1.8139	NaN	NaN	NaN	NaN	NaN	NaN	NaN	NaN	NaN	1.8908	NaN	NaN	NaN	NaN	NaN	NaN	NaN	NaN	NaN	NaN	NaN	NaN	NaN	NaN	NaN	0.80409	NaN
NaN	1.2823	0.95844	0.81513	0.97613	0.86606	NaN	NaN	NaN	NaN	NaN	NaN	NaN	NaN	NaN	NaN	NaN	NaN	1.1992	NaN	1.6725	1.6927	NaN	2.6765	NaN	2.8909	NaN	1.7634	1.9383	2.1484	1.6497	NaN	NaN	NaN	NaN	NaN	NaN	NaN	1.4494	NaN	0.99344	1.2126	2.5469	NaN	4.5368	0.67074	NaN	2.6472	2.1047	1.1715
1.0928	1.3774	1.2389	1.5885	2.4587	2.4295	1.8091	3.2714	3.0609	2.5188	1.3991	3.6926	6.1092	9.634	9.1185	6.5411	14.359	3.7586	0.9896	2.7257	1.4674	1.3093	NaN	3.521	3.5238	4.6201	5.5335	3.3334	2.2242	NaN	4.567	12.322	NaN	16.073	10.83	11.946	1.5201	1.7099	0.85878	1.5325	2.1409	2.5886	2.1816	2.3165	2.6003	1.1112	1.9052	4.9792	6.0874	7.3307
NaN	NaN	NaN	NaN	NaN	NaN	NaN	NaN	NaN	NaN	NaN	NaN	NaN	NaN	NaN	NaN	NaN	NaN	NaN	NaN	NaN	NaN	NaN	NaN	NaN	NaN	NaN	NaN	NaN	NaN	2.1243	NaN	1.3599	NaN	NaN	NaN	NaN	NaN	NaN	NaN	NaN	NaN	NaN	NaN	NaN	NaN	NaN	NaN	NaN	NaN
NaN	NaN	0.7697	NaN	NaN	NaN	NaN	NaN	NaN	NaN	NaN	NaN	NaN	NaN	NaN	NaN	NaN	NaN	NaN	0.48748	NaN	NaN	1.1347	NaN	NaN	NaN	NaN	1.213	NaN	NaN	NaN	0.45624	NaN	NaN	NaN	NaN	NaN	NaN	NaN	NaN	NaN	NaN	NaN	NaN	NaN	NaN	NaN	NaN	NaN	NaN
NaN	NaN	NaN	NaN	NaN	NaN	NaN	NaN	NaN	NaN	NaN	NaN	NaN	NaN	NaN	NaN	NaN	NaN	NaN	NaN	NaN	NaN	NaN	NaN	NaN	NaN	NaN	NaN	NaN	NaN	NaN	NaN	NaN	NaN	NaN	NaN	NaN	NaN	NaN	NaN	NaN	NaN	NaN	NaN	NaN	NaN	NaN	NaN	NaN	NaN
NaN	NaN	NaN	NaN	NaN	NaN	NaN	NaN	NaN	NaN	NaN	NaN	NaN	NaN	NaN	NaN	NaN	NaN	NaN	NaN	NaN	NaN	NaN	NaN	NaN	NaN	NaN	NaN	NaN	NaN	NaN	NaN	NaN	NaN	NaN	NaN	NaN	NaN	NaN	NaN	NaN	NaN	NaN	NaN	NaN	NaN	NaN	NaN	NaN	NaN
NaN	NaN	NaN	NaN	NaN	NaN	NaN	NaN	NaN	NaN	NaN	NaN	NaN	NaN	NaN	NaN	NaN	NaN	NaN	NaN	NaN	NaN	NaN	NaN	NaN	NaN	NaN	NaN	NaN	NaN	NaN	NaN	NaN	NaN	NaN	NaN	NaN	NaN	NaN	NaN	NaN	NaN	NaN	NaN	NaN	NaN	NaN	NaN	NaN	NaN
NaN	NaN	NaN	NaN	NaN	NaN	NaN	NaN	NaN	NaN	NaN	NaN	NaN	NaN	NaN	NaN	NaN	NaN	NaN	NaN	NaN	NaN	NaN	NaN	NaN	NaN	NaN	NaN	NaN	NaN	NaN	NaN	NaN	NaN	1.7841	NaN	NaN	NaN	NaN	NaN	NaN	NaN	NaN	NaN	NaN	NaN	NaN	NaN	NaN	NaN
NaN	NaN	NaN	NaN	NaN	NaN	NaN	NaN	NaN	NaN	NaN	NaN	NaN	NaN	NaN	NaN	NaN	NaN	NaN	NaN	NaN	NaN	NaN	NaN	NaN	NaN	NaN	NaN	NaN	NaN	NaN	NaN	NaN	NaN	NaN	NaN	NaN	NaN	NaN	NaN	NaN	NaN	NaN	NaN	NaN	NaN	NaN	NaN	NaN	NaN
1.12	1.003	0.71159	1.4951	NaN	0.67212	0.71564	0.86551	1.5291	0.81409	0.47523	NaN	0.63829	0.98496	0.49076	0.52295	0.54477	NaN	NaN	7.0258	1.0491	3.2163	NaN	5.812	3.4199	1.3944	3.587	4.0992	2.8385	3.6583	2.2905	5.5119	4.6168	3.8246	2.4517	2.6131	NaN	NaN	1.4069	2.0758	NaN	2.5423	2.0521	4.22	2.5516	3.793	1.2485	1.2753	2.7349	4.2869
0.91869	1.1456	0.83446	0.96628	0.77803	0.90124	0.88301	0.99153	0.8712	0.97554	0.76059	0.67484	0.93121	0.98929	0.88937	0.61715	0.9514	0.69941	1.6276	2.2341	1.0826	2.7131	NaN	1.9303	2.201	1.6511	2.0162	1.6336	1.8876	1.781	1.7416	NaN	NaN	1.7279	1.2913	NaN	0.9949	1.1615	0.82168	1.2375	0.85983	1.2788	1.034	1.3435	1.5681	1.7326	1.2444	1.6455	2.0309	1.6019
0.9816	NaN	0.88489	NaN	NaN	NaN	NaN	NaN	0.83417	0.93165	NaN	0.76576	0.93108	NaN	0.8988	NaN	NaN	NaN	NaN	1.9453	NaN	NaN	NaN	NaN	NaN	NaN	NaN	1.9133	NaN	NaN	NaN	NaN	NaN	2.0618	NaN	1.3305	0.98343	NaN	0.88269	NaN	NaN	NaN	1.6543	1.4981	NaN	NaN	1.3098	NaN	NaN	NaN
1.0907	0.95645	0.73092	1.1418	0.5578	0.82773	0.65642	0.77029	NaN	NaN	0.69265	NaN	NaN	NaN	NaN	NaN	NaN	NaN	1.3433	1.9174	NaN	NaN	NaN	NaN	NaN	NaN	NaN	NaN	NaN	NaN	NaN	NaN	NaN	NaN	NaN	NaN	NaN	NaN	NaN	NaN	NaN	NaN	NaN	NaN	NaN	NaN	NaN	NaN	NaN	NaN
NaN	NaN	NaN	NaN	NaN	NaN	NaN	NaN	NaN	NaN	NaN	NaN	NaN	NaN	NaN	NaN	NaN	NaN	NaN	NaN	NaN	NaN	NaN	NaN	NaN	NaN	NaN	NaN	NaN	NaN	NaN	NaN	NaN	NaN	NaN	NaN	NaN	NaN	NaN	NaN	NaN	NaN	NaN	NaN	NaN	NaN	NaN	NaN	NaN	NaN
NaN	NaN	NaN	NaN	NaN	NaN	NaN	NaN	NaN	NaN	NaN	NaN	NaN	NaN	NaN	NaN	NaN	NaN	NaN	NaN	NaN	NaN	NaN	NaN	NaN	NaN	NaN	NaN	NaN	NaN	NaN	NaN	NaN	NaN	NaN	NaN	NaN	NaN	NaN	NaN	NaN	NaN	NaN	NaN	NaN	NaN	NaN	NaN	NaN	NaN
NaN	NaN	NaN	NaN	NaN	NaN	NaN	NaN	NaN	NaN	NaN	NaN	NaN	NaN	NaN	NaN	NaN	NaN	NaN	2.7322	NaN	NaN	NaN	NaN	NaN	NaN	NaN	NaN	NaN	NaN	NaN	NaN	NaN	NaN	NaN	NaN	NaN	NaN	NaN	1.1296	NaN	NaN	NaN	NaN	NaN	NaN	NaN	NaN	NaN	NaN
NaN	NaN	1.0859	NaN	0.81481	NaN	NaN	1.6045	0.96947	1.1158	0.84341	1.3232	1.365	0.98112	NaN	NaN	NaN	NaN	NaN	NaN	NaN	NaN	NaN	1.728	NaN	2.0676	2.151	NaN	1.5047	2.4114	2.9828	NaN	1.7726	NaN	NaN	NaN	1.0218	NaN	1.0898	NaN	1.314	1.1735	1.1353	NaN	1.1994	1.8762	0.90404	NaN	NaN	NaN
1.0127	1.0062	1.2557	0.65677	0.72999	0.78804	0.86861	0.93582	0.5048	0.70306	0.78273	0.67187	0.68851	0.69012	0.50888	0.39379	0.71516	NaN	1.2776	0.79341	1.3607	1.391	0.75549	1.3989	1.4306	1.1148	1.4016	1.4594	1.3539	1.3996	1.3624	1.2541	1.4894	1.2699	2.8586	0.82776	0.7694	0.93579	0.98248	1.0971	0.72419	0.98535	0.94211	0.63934	0.98683	0.73464	0.80151	0.88829	1.0057	1.0733
NaN	NaN	NaN	NaN	NaN	NaN	NaN	NaN	NaN	NaN	NaN	NaN	NaN	NaN	NaN	NaN	NaN	NaN	NaN	1.0173	0.99753	NaN	NaN	NaN	1.5966	NaN	0.8803	NaN	1.2877	1.4156	0.99528	NaN	NaN	NaN	NaN	NaN	NaN	NaN	NaN	NaN	NaN	NaN	NaN	NaN	NaN	NaN	NaN	NaN	NaN	NaN
1.2095	1.9287	1.0641	2.2846	NaN	NaN	0.68971	NaN	2.5164	0.76521	NaN	NaN	NaN	NaN	NaN	NaN	NaN	NaN	NaN	NaN	NaN	NaN	NaN	NaN	NaN	NaN	NaN	NaN	NaN	NaN	NaN	NaN	NaN	NaN	NaN	NaN	NaN	NaN	NaN	NaN	NaN	NaN	NaN	NaN	NaN	NaN	NaN	NaN	NaN	NaN
1.3345	NaN	1.1274	1.0726	NaN	1.7666	1.5476	NaN	0.84169	NaN	NaN	NaN	NaN	NaN	NaN	NaN	NaN	NaN	NaN	NaN	NaN	NaN	NaN	NaN	NaN	2.1029	NaN	NaN	NaN	3.6099	NaN	2.9089	2.4649	NaN	NaN	NaN	NaN	NaN	NaN	NaN	NaN	NaN	NaN	1.184	1.5539	NaN	NaN	NaN	NaN	NaN
1.2748	2.0686	1.639	NaN	1.7218	NaN	NaN	1.7012	1.0691	1.3542	1.6193	1.8171	1.5359	1.4844	1.4855	1.2057	1.9236	0.60536	1.6331	2.4321	2.8863	2.645	3.4681	2.9479	3.1466	2.9792	2.5334	3.0634	3.082	NaN	3.1424	NaN	2.4649	3.0546	3.0168	2.4045	1.2594	2.1068	1.7745	1.9857	2.04	1.9419	1.9731	NaN	NaN	1.4345	2.3456	2.2072	2.094	2.2019
NaN	NaN	NaN	NaN	2.0323	NaN	NaN	NaN	NaN	NaN	NaN	NaN	NaN	NaN	NaN	NaN	NaN	NaN	NaN	NaN	NaN	NaN	NaN	NaN	NaN	NaN	NaN	NaN	NaN	NaN	NaN	NaN	NaN	NaN	NaN	NaN	NaN	NaN	NaN	NaN	NaN	NaN	NaN	NaN	NaN	NaN	NaN	NaN	NaN	NaN
1.2457	NaN	1.6325	0.44077	2.0323	0.88371	0.74494	0.96729	NaN	0.82965	1.1327	2.685	1.5171	1.6283	1.7981	1.1563	2.6692	2.9363	1.8621	0.39297	2.3698	1.0971	NaN	NaN	1.0239	1.7182	1.2188	NaN	1.4285	1.1806	2.2735	1.2946	0.95575	1.4314	NaN	1.4835	0.9529	0.61903	0.7106	0.66454	1.1181	0.43215	0.54767	0.40872	0.87628	0.82136	1.1807	1.4223	0.97042	NaN
NaN	0.94119	1.0062	0.72709	0.74999	0.55149	0.99786	0.7859	0.97241	0.68504	NaN	1.1392	1.4838	1.2976	1.3031	1.3337	2.3745	1.5708	0.95522	1.7588	1.3472	1.3997	NaN	NaN	1.4833	1.5049	1.4327	1.633	1.8092	1.8301	2.5422	2.3293	1.4842	3.5825	2.6889	2.3713	0.90754	1.0701	1.0597	1.2477	1.0022	NaN	1.2949	1.5337	1.8049	1.4519	1.6344	NaN	NaN	NaN
NaN	NaN	NaN	NaN	NaN	NaN	NaN	NaN	NaN	NaN	NaN	NaN	NaN	NaN	NaN	NaN	NaN	NaN	NaN	NaN	NaN	NaN	NaN	NaN	NaN	NaN	NaN	NaN	NaN	NaN	NaN	NaN	NaN	NaN	NaN	NaN	NaN	NaN	NaN	NaN	NaN	NaN	NaN	NaN	NaN	NaN	NaN	NaN	NaN	NaN
NaN	NaN	NaN	NaN	NaN	NaN	NaN	NaN	NaN	NaN	NaN	NaN	NaN	NaN	NaN	NaN	NaN	NaN	NaN	NaN	NaN	NaN	NaN	NaN	NaN	NaN	NaN	NaN	NaN	NaN	NaN	NaN	NaN	NaN	NaN	NaN	NaN	NaN	NaN	NaN	NaN	NaN	NaN	NaN	NaN	NaN	NaN	NaN	NaN	NaN
NaN	NaN	NaN	NaN	NaN	NaN	NaN	NaN	NaN	NaN	NaN	NaN	NaN	NaN	NaN	NaN	NaN	NaN	1.4927	NaN	NaN	NaN	NaN	NaN	NaN	NaN	NaN	NaN	NaN	NaN	NaN	NaN	NaN	NaN	NaN	NaN	NaN	1.5502	1.8119	0.58975	NaN	NaN	1.1046	1.5264	1.2906	NaN	NaN	NaN	NaN	NaN
NaN	0.96266	NaN	NaN	NaN	NaN	NaN	NaN	NaN	NaN	NaN	NaN	NaN	NaN	NaN	NaN	NaN	NaN	NaN	1.3748	NaN	NaN	NaN	NaN	NaN	NaN	NaN	NaN	NaN	NaN	NaN	NaN	NaN	NaN	NaN	NaN	NaN	NaN	NaN	NaN	NaN	NaN	NaN	NaN	NaN	NaN	NaN	NaN	NaN	NaN
NaN	NaN	NaN	NaN	NaN	NaN	NaN	NaN	NaN	NaN	NaN	NaN	NaN	NaN	NaN	NaN	NaN	NaN	NaN	NaN	NaN	NaN	NaN	NaN	NaN	NaN	NaN	NaN	NaN	NaN	NaN	NaN	NaN	NaN	NaN	NaN	NaN	NaN	NaN	NaN	NaN	NaN	NaN	NaN	NaN	NaN	NaN	NaN	NaN	NaN
0.93223	1.4306	NaN	NaN	0.82149	NaN	1.0715	NaN	0.58294	NaN	NaN	NaN	0.7439	0.8977	NaN	NaN	0.903	0.7851	1.1671	1.5049	NaN	NaN	NaN	NaN	1.9584	NaN	1.2261	NaN	NaN	NaN	1.3761	NaN	NaN	1.1252	NaN	1.393	NaN	NaN	NaN	NaN	NaN	1.3477	NaN	1.5595	NaN	NaN	NaN	NaN	NaN	0.92798
NaN	NaN	NaN	NaN	NaN	NaN	NaN	NaN	NaN	NaN	NaN	NaN	NaN	NaN	NaN	NaN	NaN	NaN	NaN	NaN	NaN	NaN	NaN	NaN	NaN	NaN	NaN	NaN	NaN	NaN	NaN	NaN	NaN	NaN	NaN	NaN	NaN	NaN	NaN	NaN	NaN	NaN	NaN	NaN	NaN	NaN	NaN	NaN	NaN	NaN
NaN	NaN	NaN	NaN	NaN	NaN	NaN	NaN	NaN	NaN	NaN	NaN	NaN	NaN	NaN	NaN	NaN	NaN	NaN	NaN	NaN	NaN	NaN	NaN	NaN	NaN	NaN	NaN	NaN	NaN	NaN	NaN	NaN	NaN	NaN	NaN	NaN	NaN	NaN	NaN	NaN	NaN	NaN	NaN	NaN	NaN	NaN	NaN	NaN	NaN
NaN	NaN	NaN	NaN	NaN	NaN	NaN	NaN	NaN	NaN	NaN	NaN	NaN	NaN	NaN	NaN	NaN	NaN	NaN	NaN	NaN	NaN	NaN	NaN	NaN	NaN	NaN	NaN	NaN	NaN	NaN	NaN	NaN	NaN	NaN	NaN	NaN	1.5356	0.50274	NaN	NaN	NaN	NaN	NaN	NaN	NaN	NaN	NaN	NaN	NaN
0.82485	0.80471	0.86851	0.57145	0.80195	0.83858	0.81999	0.87695	0.72394	0.72545	0.88329	0.96604	0.77848	1.0131	0.8824	0.6965	1.2293	0.57462	1.1464	1.4053	1.3813	1.2062	1.4213	1.2861	1.3865	1.4225	1.4731	1.4808	1.5247	1.7514	1.7829	1.7289	1.5538	2.0217	1.5923	1.3103	0.8628	0.99028	1.1743	1.0029	0.92714	0.8865	1.0136	0.86188	0.78154	0.76986	1.1318	1.2122	1.1736	1.2972
NaN	NaN	NaN	NaN	NaN	NaN	NaN	NaN	NaN	NaN	NaN	NaN	NaN	NaN	NaN	NaN	NaN	NaN	NaN	NaN	NaN	NaN	NaN	NaN	NaN	NaN	NaN	NaN	NaN	NaN	NaN	NaN	NaN	NaN	NaN	NaN	NaN	NaN	NaN	NaN	NaN	NaN	NaN	NaN	NaN	NaN	NaN	NaN	NaN	NaN
NaN	NaN	NaN	NaN	NaN	NaN	NaN	NaN	NaN	NaN	NaN	NaN	NaN	NaN	NaN	NaN	NaN	NaN	NaN	NaN	NaN	NaN	NaN	NaN	0.85021	NaN	NaN	NaN	NaN	NaN	NaN	NaN	NaN	NaN	NaN	NaN	NaN	NaN	NaN	NaN	NaN	0.36286	NaN	NaN	NaN	NaN	NaN	NaN	NaN	NaN
NaN	0.73626	NaN	NaN	NaN	NaN	0.21665	NaN	0.095014	NaN	NaN	NaN	NaN	NaN	NaN	NaN	NaN	NaN	NaN	NaN	NaN	NaN	NaN	0.79474	NaN	NaN	0.56043	NaN	NaN	NaN	NaN	NaN	NaN	NaN	NaN	NaN	0.97366	NaN	NaN	0.55613	NaN	NaN	0.32291	NaN	NaN	NaN	NaN	NaN	NaN	NaN
1.0592	NaN	0.11123	NaN	NaN	NaN	NaN	NaN	NaN	NaN	NaN	NaN	NaN	NaN	NaN	NaN	NaN	NaN	1.2243	0.22089	NaN	NaN	NaN	NaN	NaN	NaN	NaN	NaN	NaN	NaN	NaN	NaN	NaN	NaN	NaN	NaN	1.0801	NaN	NaN	NaN	NaN	NaN	NaN	NaN	NaN	NaN	0.52376	NaN	NaN	NaN
NaN	NaN	NaN	NaN	NaN	NaN	NaN	NaN	NaN	NaN	NaN	NaN	NaN	NaN	NaN	NaN	NaN	NaN	NaN	NaN	NaN	NaN	NaN	NaN	NaN	NaN	NaN	NaN	NaN	NaN	NaN	NaN	NaN	NaN	NaN	NaN	NaN	NaN	NaN	NaN	NaN	NaN	NaN	NaN	NaN	NaN	NaN	NaN	NaN	NaN
NaN	NaN	NaN	NaN	NaN	NaN	NaN	NaN	NaN	NaN	NaN	NaN	NaN	NaN	NaN	NaN	NaN	NaN	NaN	NaN	1.236	NaN	NaN	NaN	NaN	NaN	NaN	4.2661	NaN	NaN	NaN	NaN	NaN	NaN	NaN	NaN	NaN	NaN	NaN	NaN	NaN	NaN	NaN	NaN	NaN	NaN	NaN	NaN	NaN	NaN
1.1741	1.188	NaN	1.0532	1.2385	1.077	0.91566	NaN	NaN	0.98958	1.2775	1.6143	1.5702	1.696	1.721	1.3868	NaN	0.88413	1.1944	NaN	1.3442	0.83937	2.2429	1.9842	1.6745	2.23	1.8521	2.6281	1.7568	NaN	NaN	NaN	NaN	3.9129	NaN	2.4783	0.93411	1.5972	0.91272	1.223	1.2596	1.2749	0.83755	1.1695	1.1742	1.4986	1.5411	NaN	NaN	NaN
NaN	NaN	NaN	NaN	NaN	NaN	NaN	NaN	NaN	NaN	NaN	NaN	NaN	NaN	NaN	NaN	NaN	NaN	NaN	NaN	NaN	NaN	NaN	NaN	NaN	NaN	NaN	NaN	NaN	NaN	NaN	NaN	NaN	NaN	NaN	NaN	NaN	NaN	NaN	NaN	NaN	NaN	NaN	NaN	NaN	NaN	NaN	NaN	NaN	NaN
NaN	NaN	NaN	NaN	NaN	NaN	0.82866	NaN	NaN	NaN	NaN	NaN	NaN	NaN	NaN	NaN	NaN	NaN	NaN	NaN	NaN	NaN	NaN	NaN	NaN	NaN	NaN	NaN	NaN	NaN	NaN	NaN	NaN	NaN	NaN	NaN	NaN	NaN	NaN	NaN	NaN	1.0613	NaN	NaN	2.4638	NaN	NaN	NaN	NaN	NaN
NaN	0.92692	NaN	NaN	0.80638	0.84244	0.74805	0.8946	0.70429	0.72327	0.80144	0.91832	0.9592	1.0615	0.95342	0.80537	1.5621	0.69312	1.2971	NaN	1.6278	1.5155	NaN	1.445	1.7672	2.1646	NaN	2.0821	NaN	2.0301	2.1778	1.7795	NaN	NaN	NaN	1.6195	NaN	NaN	NaN	NaN	NaN	NaN	NaN	NaN	NaN	NaN	NaN	NaN	NaN	NaN
1.161	NaN	NaN	NaN	NaN	NaN	NaN	NaN	NaN	NaN	NaN	NaN	NaN	NaN	NaN	NaN	NaN	NaN	NaN	NaN	NaN	NaN	NaN	1.445	NaN	NaN	1.6146	2.0821	NaN	NaN	NaN	NaN	NaN	1.5628	1.7811	NaN	NaN	NaN	NaN	NaN	NaN	NaN	NaN	NaN	NaN	NaN	NaN	NaN	NaN	NaN
NaN	NaN	NaN	NaN	NaN	NaN	NaN	NaN	NaN	NaN	1.0464	NaN	NaN	NaN	NaN	NaN	NaN	NaN	NaN	NaN	NaN	NaN	NaN	NaN	NaN	NaN	NaN	NaN	NaN	NaN	NaN	NaN	NaN	NaN	NaN	NaN	NaN	NaN	NaN	NaN	NaN	NaN	NaN	NaN	0.67201	NaN	NaN	NaN	NaN	NaN
NaN	NaN	NaN	NaN	NaN	NaN	1.0046	NaN	NaN	NaN	NaN	NaN	NaN	NaN	NaN	NaN	NaN	NaN	1.4732	NaN	NaN	NaN	NaN	NaN	NaN	NaN	1.2884	NaN	NaN	NaN	NaN	NaN	NaN	NaN	NaN	1.1867	NaN	NaN	NaN	NaN	NaN	NaN	NaN	NaN	NaN	NaN	1.4515	NaN	NaN	NaN
NaN	NaN	NaN	NaN	NaN	NaN	NaN	NaN	NaN	NaN	NaN	NaN	NaN	NaN	NaN	NaN	NaN	NaN	NaN	NaN	NaN	1.0965	NaN	NaN	NaN	NaN	1.6643	NaN	NaN	NaN	NaN	NaN	NaN	NaN	NaN	NaN	NaN	NaN	NaN	NaN	NaN	NaN	NaN	NaN	NaN	NaN	NaN	NaN	NaN	NaN
0.81362	NaN	0.70281	0.77919	0.81717	NaN	1.0846	0.75262	NaN	0.71002	NaN	NaN	NaN	0.89937	0.65809	NaN	NaN	0.70002	NaN	1.5473	NaN	NaN	NaN	1.3758	NaN	1.4612	NaN	1.5062	NaN	NaN	NaN	NaN	NaN	NaN	NaN	NaN	NaN	NaN	NaN	NaN	0.91311	0.95685	NaN	NaN	NaN	NaN	NaN	NaN	NaN	NaN
0.81362	NaN	0.70281	0.77919	0.81717	NaN	NaN	0.75262	NaN	0.71002	NaN	NaN	NaN	0.89937	0.65809	NaN	NaN	0.70002	1.4801	NaN	1.1226	0.84753	1.5114	NaN	1.5062	1.4612	NaN	1.5062	1.3796	1.4547	1.631	2.0807	1.2213	1.885	NaN	1.6462	NaN	NaN	0.87869	0.76928	0.91311	0.95685	1.1112	1.3018	NaN	0.99939	1.0231	1.2421	NaN	NaN
1.0539	0.93626	0.84013	0.79721	NaN	0.88608	0.88533	0.90008	NaN	1.0734	0.90903	0.75394	0.59337	NaN	NaN	0.20436	0.47802	0.30194	1.9518	1.9101	NaN	NaN	2.0083	NaN	1.7016	1.9405	1.7197	NaN	1.5512	NaN	1.5422	NaN	0.64258	0.64946	NaN	NaN	0.99426	1.265	0.90319	NaN	1.2912	1.1606	0.9915	0.76594	NaN	0.87874	1.0878	0.93605	NaN	NaN
NaN	NaN	NaN	NaN	NaN	NaN	NaN	NaN	NaN	NaN	NaN	NaN	NaN	NaN	0.27835	NaN	NaN	NaN	NaN	NaN	1.0159	NaN	NaN	2.3293	1.7553	2.2825	NaN	2.2977	0.74862	1.5113	1.9163	1.1909	0.88974	NaN	NaN	NaN	NaN	NaN	NaN	NaN	NaN	NaN	NaN	NaN	NaN	NaN	NaN	NaN	NaN	NaN
NaN	NaN	NaN	NaN	NaN	NaN	NaN	NaN	NaN	NaN	NaN	NaN	NaN	NaN	0.27835	NaN	NaN	0.16716	1.0387	NaN	1.0159	NaN	NaN	2.3293	1.7553	2.0206	NaN	2.1473	0.74862	1.5113	1.7987	1.1909	0.80622	NaN	NaN	NaN	NaN	NaN	NaN	NaN	NaN	NaN	NaN	NaN	NaN	NaN	NaN	NaN	NaN	NaN
NaN	NaN	NaN	NaN	NaN	NaN	NaN	NaN	NaN	NaN	NaN	NaN	NaN	NaN	NaN	NaN	NaN	NaN	1.0453	2.6541	NaN	1.5051	NaN	1.7957	1.6869	1.9871	NaN	1.202	1.4079	1.7617	1.2422	1.1794	1.7383	1.6802	1.9398	1.6	0.73637	NaN	1.4204	1.0148	NaN	1.1774	0.97135	1.1957	1.1796	0.89267	0.9916	1.1106	1.5547	1.3343
NaN	NaN	NaN	NaN	NaN	NaN	NaN	NaN	NaN	NaN	NaN	NaN	NaN	NaN	NaN	NaN	NaN	NaN	NaN	NaN	NaN	NaN	NaN	NaN	NaN	NaN	NaN	NaN	NaN	NaN	NaN	NaN	NaN	NaN	NaN	NaN	NaN	NaN	NaN	NaN	NaN	NaN	NaN	NaN	NaN	NaN	NaN	NaN	NaN	NaN
0.95532	1.0847	0.76971	NaN	0.68224	0.73092	0.60046	0.63032	0.58134	0.62818	0.63904	0.52328	NaN	NaN	NaN	NaN	NaN	NaN	1.4269	2.18	1.1356	0.80552	NaN	2.0218	1.6325	NaN	1.8668	1.43	1.0304	0.92666	0.83778	NaN	0.74912	0.6946	0.34683	NaN	0.83924	1.2982	0.99015	1.095	0.87874	1.3134	0.83826	0.82423	0.99064	0.74447	0.58671	0.64404	0.83877	NaN
0.9179	1.249	0.73522	0.92286	NaN	0.98177	0.91689	1.0782	0.76707	0.79492	0.83767	0.90735	NaN	NaN	NaN	NaN	NaN	NaN	1.2603	NaN	NaN	NaN	1.9409	2.0873	1.9199	1.8984	1.7923	1.9106	NaN	1.7519	NaN	NaN	1.3717	NaN	NaN	NaN	NaN	NaN	0.88373	1.0738	1.3121	NaN	NaN	NaN	1.0394	1.0332	1.1272	NaN	0.9921	NaN
NaN	NaN	0.56034	NaN	NaN	NaN	NaN	0.72852	NaN	NaN	NaN	NaN	NaN	NaN	NaN	NaN	NaN	NaN	NaN	NaN	NaN	NaN	NaN	NaN	NaN	NaN	NaN	NaN	NaN	NaN	NaN	NaN	NaN	NaN	NaN	NaN	NaN	NaN	NaN	NaN	NaN	NaN	NaN	NaN	NaN	NaN	NaN	NaN	NaN	1.1148
NaN	NaN	NaN	NaN	NaN	NaN	NaN	NaN	NaN	NaN	NaN	NaN	NaN	NaN	NaN	NaN	NaN	NaN	NaN	NaN	NaN	NaN	NaN	NaN	NaN	NaN	NaN	NaN	NaN	NaN	NaN	NaN	NaN	NaN	NaN	NaN	NaN	NaN	0.67284	1.0442	0.96464	1.3772	1.19	1.5379	1.2427	NaN	1.5613	1.9611	1.3323	1.6818
NaN	NaN	NaN	NaN	NaN	NaN	NaN	NaN	NaN	NaN	NaN	NaN	NaN	NaN	NaN	NaN	NaN	NaN	NaN	NaN	NaN	NaN	NaN	NaN	NaN	NaN	NaN	NaN	NaN	NaN	NaN	NaN	NaN	NaN	NaN	NaN	NaN	NaN	0.67284	1.0442	0.96464	1.3772	1.19	1.5379	1.2427	NaN	1.5613	1.9611	1.3323	1.6818
1.0883	1.1032	0.73835	0.73693	0.76845	0.75381	0.7949	0.89503	0.71258	0.52683	0.68425	0.67173	0.56619	0.50696	0.4295	0.30907	0.4932	0.1684	1.2869	1.4279	1.3051	1.2435	1.6277	1.5363	1.5295	1.2197	1.2319	1.3804	1.4395	1.5237	1.1787	1.1828	0.95799	0.83013	0.71347	0.56902	1.0715	1.0644	0.87907	0.82764	0.85766	1.0977	0.81211	0.83281	0.64048	0.70475	0.88538	0.75563	0.65281	0.63722
NaN	NaN	NaN	NaN	0.71437	NaN	NaN	NaN	NaN	NaN	NaN	NaN	0.82049	0.74657	NaN	NaN	NaN	NaN	1.2595	1.3564	NaN	NaN	NaN	NaN	NaN	1.4165	NaN	NaN	1.5941	NaN	NaN	NaN	1.2211	1.358	NaN	NaN	NaN	NaN	NaN	NaN	NaN	NaN	NaN	NaN	NaN	NaN	NaN	NaN	NaN	NaN
NaN	1.3369	NaN	1.0762	1.0781	NaN	NaN	1.0226	NaN	NaN	NaN	0.92669	NaN	NaN	NaN	NaN	NaN	NaN	NaN	NaN	NaN	NaN	1.7943	NaN	1.8702	NaN	1.9373	NaN	1.7962	1.4837	NaN	NaN	NaN	NaN	NaN	NaN	NaN	1.499	1.306	1.197	1.0588	0.96078	1.1659	NaN	NaN	NaN	NaN	NaN	1.4252	NaN
NaN	0.996	0.86189	0.72756	0.81299	0.86349	0.73026	0.84534	0.66597	NaN	0.73738	0.7099	0.55813	NaN	0.26035	0.16091	0.2198	NaN	1.1865	1.4762	1.3667	NaN	1.4743	1.49	NaN	1.3789	1.3607	1.457	NaN	1.5265	1.172	0.96241	0.62948	0.36301	NaN	0.21058	0.97898	1.1398	0.96181	0.88978	0.90387	0.95034	0.93128	0.79059	0.70198	0.71512	0.92311	NaN	NaN	0.55666
0.99531	0.996	NaN	NaN	NaN	NaN	NaN	0.84534	0.66597	0.63749	NaN	0.7099	NaN	0.41028	NaN	NaN	NaN	0.067414	1.1865	1.4762	NaN	1.3271	1.4743	1.49	1.3741	1.3789	NaN	NaN	1.4844	NaN	1.172	NaN	0.62948	NaN	0.26942	NaN	NaN	1.1398	0.96181	NaN	NaN	0.95034	NaN	0.79059	NaN	NaN	NaN	NaN	0.69624	NaN
1.1508	1.1469	0.69439	0.35183	0.97604	1.1082	0.71743	1.1827	NaN	0.81509	1.2026	1.6143	0.80533	0.46691	1.1466	0.80146	0.95646	0.92459	1.6212	0.4004	1.115	0.86996	NaN	0.97199	1.1682	1.5336	0.81587	1.0501	0.95398	1.2891	1.4333	0.79448	0.7576	1.1356	1.0008	1.14	0.90154	NaN	0.88484	0.89727	1.3706	0.57752	0.76918	0.3606	0.717	0.76553	1.7531	1.1818	0.73142	0.85521
NaN	0.7832	NaN	0.91132	1.24	0.88252	NaN	1.363	NaN	NaN	NaN	NaN	NaN	NaN	NaN	NaN	NaN	NaN	NaN	NaN	NaN	NaN	NaN	NaN	NaN	NaN	NaN	NaN	NaN	NaN	NaN	NaN	NaN	NaN	NaN	NaN	NaN	NaN	NaN	NaN	NaN	NaN	NaN	NaN	NaN	NaN	NaN	NaN	NaN	NaN
NaN	NaN	NaN	NaN	NaN	NaN	NaN	NaN	NaN	NaN	NaN	NaN	NaN	NaN	NaN	NaN	NaN	NaN	NaN	NaN	NaN	NaN	NaN	NaN	NaN	NaN	NaN	NaN	NaN	NaN	NaN	NaN	NaN	NaN	NaN	NaN	NaN	NaN	NaN	NaN	NaN	NaN	NaN	NaN	NaN	0.5649	NaN	NaN	NaN	NaN
0.99506	1.0451	0.84694	0.68927	0.81929	0.84579	0.80789	0.93592	0.61009	0.60076	0.70879	0.76653	0.52898	0.45337	0.29073	0.18458	0.24446	0.091263	1.2225	1.3222	1.4799	1.2784	1.6669	1.4395	1.4346	1.4557	1.6015	1.552	1.4401	1.5208	1.2375	0.97585	0.69294	0.55392	0.37326	0.27029	1.0711	1.3409	0.90778	0.95088	0.88781	0.87427	0.88992	0.77745	0.7543	0.81689	0.93336	0.91298	0.69306	0.61914
0.99506	1.0451	0.84694	0.68927	0.81929	0.84579	0.80789	0.93592	0.61009	0.60076	0.70879	0.76653	0.52898	0.45337	0.29073	0.18458	0.24446	0.091263	1.2225	1.3222	1.4799	1.2784	1.6669	1.4395	1.4346	1.4557	1.6015	1.552	1.4401	1.5208	1.2375	0.97585	0.69294	0.55392	0.37326	0.27029	1.0711	1.3409	0.90778	0.95088	0.88781	0.87427	0.88992	0.77745	0.7543	0.81689	0.93336	0.91298	0.69306	0.61914
0.28605	NaN	NaN	NaN	NaN	NaN	NaN	NaN	NaN	NaN	NaN	NaN	NaN	NaN	NaN	NaN	NaN	NaN	NaN	NaN	NaN	NaN	NaN	NaN	NaN	NaN	NaN	NaN	NaN	NaN	NaN	NaN	NaN	NaN	NaN	NaN	NaN	NaN	NaN	NaN	NaN	NaN	NaN	NaN	NaN	NaN	NaN	NaN	NaN	NaN
NaN	NaN	NaN	NaN	NaN	NaN	NaN	NaN	NaN	NaN	NaN	NaN	NaN	NaN	NaN	NaN	NaN	NaN	NaN	NaN	NaN	NaN	NaN	NaN	NaN	NaN	NaN	0.76397	NaN	NaN	NaN	NaN	NaN	NaN	NaN	NaN	NaN	NaN	NaN	NaN	NaN	NaN	NaN	NaN	NaN	NaN	NaN	NaN	NaN	NaN
NaN	NaN	NaN	NaN	NaN	NaN	NaN	NaN	NaN	NaN	NaN	NaN	NaN	NaN	NaN	NaN	NaN	NaN	NaN	NaN	NaN	NaN	NaN	NaN	NaN	NaN	NaN	NaN	NaN	NaN	NaN	NaN	NaN	NaN	NaN	NaN	NaN	NaN	NaN	NaN	NaN	NaN	NaN	NaN	NaN	NaN	NaN	NaN	NaN	NaN
1.1954	1.3541	NaN	NaN	NaN	NaN	NaN	0.94372	NaN	1.4682	NaN	NaN	0.89695	0.93448	0.75637	0.97741	NaN	NaN	NaN	NaN	NaN	NaN	NaN	NaN	NaN	NaN	NaN	NaN	NaN	NaN	NaN	NaN	NaN	NaN	NaN	NaN	NaN	NaN	NaN	NaN	NaN	NaN	NaN	NaN	NaN	NaN	NaN	NaN	NaN	NaN
NaN	NaN	NaN	NaN	NaN	NaN	NaN	NaN	NaN	NaN	NaN	NaN	NaN	NaN	NaN	NaN	NaN	NaN	NaN	NaN	NaN	NaN	NaN	NaN	NaN	NaN	NaN	NaN	NaN	NaN	NaN	NaN	NaN	NaN	NaN	NaN	NaN	NaN	NaN	NaN	NaN	NaN	NaN	NaN	NaN	NaN	NaN	NaN	NaN	NaN
NaN	NaN	NaN	NaN	NaN	NaN	NaN	NaN	NaN	NaN	NaN	NaN	NaN	NaN	NaN	NaN	NaN	NaN	0.90107	NaN	0.81602	0.80317	NaN	1.3536	1.2255	1.2698	1.2694	1.1201	NaN	NaN	NaN	NaN	NaN	NaN	NaN	NaN	NaN	1.2479	NaN	NaN	0.79509	0.77849	0.60631	NaN	NaN	0.33086	NaN	0.69533	NaN	NaN
NaN	NaN	NaN	NaN	NaN	NaN	NaN	NaN	NaN	1.1213	NaN	NaN	NaN	NaN	NaN	NaN	NaN	NaN	NaN	NaN	NaN	NaN	NaN	NaN	NaN	NaN	NaN	NaN	NaN	NaN	NaN	NaN	NaN	NaN	NaN	NaN	NaN	NaN	NaN	NaN	NaN	NaN	NaN	NaN	NaN	NaN	NaN	NaN	NaN	NaN
0.95178	NaN	NaN	NaN	NaN	NaN	NaN	NaN	NaN	NaN	NaN	NaN	NaN	NaN	NaN	NaN	NaN	NaN	NaN	NaN	NaN	NaN	NaN	NaN	NaN	NaN	NaN	NaN	NaN	NaN	NaN	NaN	NaN	NaN	NaN	NaN	NaN	NaN	0.49102	0.76253	NaN	1.1191	NaN	NaN	NaN	NaN	NaN	NaN	NaN	NaN
0.9438	0.98944	0.65308	0.93582	0.73964	0.91216	NaN	1.249	0.97932	1.1616	0.80226	1.1451	0.9839	0.96018	0.77153	0.44558	0.9998	NaN	0.99745	2.2903	0.78017	0.52901	NaN	2.1794	2.0103	2.0466	2.0541	1.9448	1.6242	2.2605	2.0297	2.6081	1.9607	2.0969	0.84804	1.7116	0.86446	1.4575	0.3812	0.85784	1.1638	1.4793	1.046	0.87352	1.2903	0.91173	1.3859	1.5888	1.9626	1.8944
NaN	NaN	NaN	NaN	NaN	NaN	NaN	NaN	NaN	NaN	NaN	NaN	NaN	NaN	NaN	NaN	NaN	NaN	NaN	NaN	NaN	NaN	NaN	NaN	NaN	NaN	NaN	NaN	NaN	NaN	NaN	NaN	NaN	NaN	NaN	NaN	NaN	NaN	1.6652	1.8787	1.9668	2.7208	NaN	2.6946	5.0758	3.1068	4.7966	NaN	NaN	3.7516
NaN	1.0593	NaN	NaN	NaN	0.95151	0.88882	NaN	0.88632	0.77339	1.2791	NaN	NaN	1.2563	NaN	NaN	NaN	NaN	1.2016	NaN	NaN	NaN	NaN	NaN	NaN	NaN	NaN	1.6912	2.2595	NaN	NaN	NaN	NaN	NaN	NaN	NaN	0.92973	NaN	NaN	NaN	NaN	NaN	NaN	NaN	NaN	1.0871	NaN	2.2485	1.313	NaN
NaN	NaN	NaN	NaN	NaN	NaN	NaN	NaN	NaN	NaN	NaN	NaN	NaN	NaN	NaN	NaN	NaN	NaN	NaN	NaN	NaN	NaN	NaN	NaN	NaN	NaN	NaN	NaN	NaN	NaN	NaN	NaN	NaN	NaN	NaN	NaN	NaN	NaN	NaN	NaN	NaN	NaN	NaN	NaN	NaN	NaN	NaN	NaN	NaN	NaN
NaN	NaN	NaN	NaN	NaN	NaN	NaN	NaN	NaN	NaN	NaN	NaN	NaN	NaN	NaN	NaN	NaN	NaN	NaN	NaN	NaN	NaN	NaN	NaN	NaN	NaN	NaN	NaN	NaN	NaN	NaN	NaN	NaN	NaN	NaN	NaN	NaN	NaN	NaN	NaN	NaN	NaN	NaN	NaN	NaN	NaN	NaN	NaN	NaN	NaN
NaN	NaN	NaN	NaN	NaN	NaN	NaN	NaN	NaN	NaN	NaN	NaN	NaN	NaN	NaN	NaN	NaN	NaN	1.3132	NaN	0.85058	1.4258	NaN	0.85669	0.96605	0.58276	1.0541	0.42522	0.85121	NaN	NaN	NaN	NaN	NaN	NaN	NaN	NaN	NaN	NaN	NaN	NaN	NaN	NaN	NaN	NaN	NaN	NaN	NaN	NaN	NaN
1.0927	0.82081	0.67046	0.67216	0.59757	0.63483	0.47694	0.59014	0.56897	0.58859	0.37108	0.33814	0.39379	0.45606	0.35347	0.2353	0.49264	NaN	NaN	NaN	NaN	NaN	NaN	NaN	NaN	NaN	NaN	NaN	NaN	NaN	NaN	NaN	NaN	NaN	NaN	NaN	0.99704	1.2308	0.999	1.0584	0.84208	1.0093	0.89583	0.65816	0.75506	0.53279	0.71173	0.45281	0.54228	0.47344
0.98243	0.91956	0.78618	0.45483	NaN	0.74061	NaN	0.6682	0.42516	0.40073	0.91385	0.85283	0.52835	0.53862	0.43392	NaN	NaN	NaN	NaN	NaN	NaN	NaN	NaN	NaN	NaN	NaN	NaN	NaN	NaN	NaN	NaN	NaN	NaN	NaN	NaN	NaN	0.9279	0.85705	0.76992	NaN	0.91539	0.76604	NaN	0.81662	0.86473	0.6215	0.6101	0.65878	NaN	0.6879
1.2094	0.93841	NaN	NaN	0.42536	NaN	0.63787	0.63145	0.72803	0.96914	0.37988	NaN	0.55335	1.3373	0.50297	0.50523	NaN	0.1463	1.0721	1.9535	NaN	1.5618	NaN	1.7944	1.381	0.8143	NaN	2.1116	NaN	2.127	1.2062	2.4161	1.6836	1.9646	2.3639	1.2135	NaN	NaN	NaN	NaN	NaN	NaN	NaN	NaN	NaN	NaN	NaN	NaN	NaN	NaN
NaN	NaN	NaN	0.61808	NaN	NaN	NaN	0.959	NaN	NaN	NaN	NaN	NaN	NaN	NaN	NaN	NaN	NaN	NaN	NaN	NaN	NaN	NaN	NaN	NaN	NaN	NaN	NaN	NaN	NaN	NaN	NaN	NaN	NaN	NaN	NaN	NaN	NaN	NaN	0.86167	NaN	NaN	NaN	0.58029	NaN	NaN	NaN	NaN	NaN	NaN
0.99729	1.0266	0.98298	0.54884	0.92536	0.89825	0.82131	0.87861	0.52152	0.65822	0.84744	0.85773	0.7426	0.70783	0.64093	0.51994	0.7566	0.29284	1.2148	1.0929	1.5869	1.3846	1.5929	1.2928	1.374	1.3977	1.3298	1.5082	1.5081	1.613	1.4363	1.292	1.208	1.2326	1.1385	0.8374	1.0435	1.089	1.003	NaN	0.9896	0.9143	0.9808	0.60254	0.81131	0.81728	1.0309	1.0431	0.97584	1.0362
NaN	NaN	NaN	NaN	NaN	NaN	NaN	NaN	NaN	NaN	NaN	NaN	NaN	NaN	NaN	NaN	NaN	NaN	NaN	NaN	NaN	NaN	NaN	NaN	NaN	NaN	NaN	NaN	NaN	NaN	NaN	NaN	NaN	NaN	NaN	0.77236	NaN	NaN	NaN	NaN	NaN	NaN	NaN	NaN	NaN	NaN	NaN	NaN	NaN	NaN
0.88835	1.2513	0.67211	1.037	0.93331	0.9885	0.81694	0.89326	0.67837	0.61185	0.54948	0.32677	0.21371	0.1476	0.092067	0.1506	0.17277	NaN	1.5089	3.1553	1.5975	1.1006	2.5145	2.6311	1.9138	2.492	2.0857	1.7942	1.0577	0.90817	0.73005	0.53469	0.34179	0.21098	0.13928	0.18132	1.2092	1.6534	0.86091	1.269	1.122	1.1526	0.78566	0.93936	0.97146	0.63102	0.82896	0.54163	0.31022	0.29636
NaN	NaN	NaN	NaN	NaN	NaN	NaN	NaN	NaN	NaN	NaN	NaN	NaN	NaN	NaN	NaN	NaN	NaN	NaN	NaN	NaN	NaN	NaN	NaN	NaN	NaN	NaN	NaN	NaN	NaN	NaN	NaN	NaN	NaN	NaN	NaN	NaN	NaN	NaN	NaN	NaN	NaN	NaN	NaN	NaN	NaN	NaN	NaN	NaN	NaN
NaN	NaN	NaN	NaN	NaN	NaN	NaN	NaN	NaN	NaN	NaN	NaN	NaN	NaN	NaN	NaN	NaN	NaN	NaN	NaN	NaN	NaN	NaN	NaN	NaN	NaN	NaN	NaN	NaN	NaN	NaN	NaN	NaN	NaN	NaN	NaN	NaN	NaN	NaN	NaN	NaN	NaN	NaN	NaN	NaN	NaN	NaN	NaN	NaN	NaN
NaN	NaN	NaN	NaN	NaN	NaN	NaN	NaN	NaN	NaN	NaN	NaN	NaN	NaN	NaN	NaN	NaN	NaN	NaN	NaN	NaN	NaN	NaN	NaN	NaN	NaN	NaN	NaN	NaN	NaN	NaN	NaN	NaN	NaN	NaN	NaN	NaN	NaN	NaN	NaN	NaN	NaN	NaN	NaN	NaN	NaN	NaN	NaN	NaN	NaN
NaN	0.77017	NaN	0.3488	NaN	NaN	NaN	NaN	NaN	NaN	NaN	NaN	NaN	NaN	NaN	NaN	NaN	NaN	NaN	NaN	NaN	NaN	NaN	NaN	NaN	NaN	NaN	NaN	NaN	NaN	NaN	NaN	NaN	NaN	NaN	NaN	NaN	NaN	NaN	NaN	NaN	NaN	NaN	NaN	NaN	NaN	NaN	NaN	NaN	NaN
NaN	NaN	NaN	NaN	NaN	NaN	NaN	NaN	NaN	NaN	NaN	NaN	NaN	NaN	NaN	NaN	NaN	NaN	NaN	NaN	NaN	NaN	NaN	NaN	NaN	NaN	NaN	NaN	NaN	NaN	NaN	NaN	NaN	NaN	NaN	NaN	NaN	NaN	NaN	NaN	NaN	NaN	NaN	NaN	NaN	NaN	NaN	NaN	NaN	NaN
1.1004	0.90545	0.80704	0.52837	0.59018	0.50959	0.41264	0.36162	0.21496	0.11839	NaN	0.050798	NaN	NaN	NaN	NaN	NaN	NaN	1.2939	1.2656	1.1672	1.1582	1.1729	1.0632	1.1352	0.97634	0.87814	0.55147	0.4089	0.17878	0.10872	NaN	NaN	NaN	NaN	NaN	1.0353	1.0605	0.76219	0.68339	0.69737	0.57974	0.5684	0.47029	0.38601	0.15973	NaN	NaN	NaN	NaN
1.2404	1.0291	0.55436	0.69248	0.66908	0.73126	0.54815	0.74871	0.5653	0.43633	0.46893	0.2265	0.085311	0.088713	NaN	0.15774	0.29491	0.24917	1.1872	NaN	NaN	0.71167	NaN	1.6153	1.4332	1.2253	1.8262	NaN	0.84986	0.70445	0.4595	0.35317	NaN	0.38988	NaN	0.49217	1.0043	1.1655	0.53732	0.83476	NaN	0.81184	0.69353	0.79596	0.87891	NaN	0.52821	0.29831	0.1979	0.22559
NaN	NaN	NaN	NaN	NaN	NaN	0.54815	NaN	0.5653	NaN	NaN	NaN	0.085311	NaN	NaN	NaN	NaN	NaN	NaN	NaN	0.64835	NaN	NaN	NaN	1.4332	NaN	NaN	NaN	NaN	0.70445	NaN	NaN	NaN	NaN	NaN	NaN	NaN	1.1655	NaN	NaN	NaN	0.81184	0.69353	0.79596	NaN	NaN	0.52821	0.29831	NaN	0.22559
NaN	NaN	NaN	NaN	NaN	0.73126	NaN	NaN	NaN	NaN	NaN	NaN	NaN	NaN	NaN	NaN	NaN	NaN	NaN	NaN	NaN	NaN	NaN	NaN	NaN	NaN	NaN	NaN	NaN	NaN	NaN	NaN	NaN	NaN	NaN	NaN	NaN	NaN	NaN	NaN	1.0171	NaN	NaN	NaN	0.87891	NaN	NaN	NaN	NaN	NaN
1.2404	NaN	0.55436	0.69248	NaN	NaN	NaN	0.74871	NaN	0.43633	0.46893	0.2265	NaN	0.088713	NaN	0.15774	0.29491	0.24917	1.1872	NaN	NaN	0.71167	NaN	NaN	NaN	1.2253	1.8262	1.6138	0.84986	NaN	0.4595	0.35317	NaN	0.38988	NaN	0.49217	1.0043	NaN	0.53732	0.83476	1.0171	NaN	NaN	NaN	NaN	0.5776	NaN	NaN	0.1979	NaN
0.97694	0.98888	0.72789	0.66299	NaN	NaN	NaN	NaN	NaN	0.79803	0.68123	NaN	NaN	NaN	NaN	NaN	NaN	NaN	1.5781	NaN	NaN	NaN	NaN	NaN	NaN	NaN	NaN	1.5987	1.6841	0.8888	0.60683	NaN	NaN	NaN	NaN	NaN	1.0065	NaN	NaN	0.67462	NaN	0.77025	0.95978	NaN	0.68243	NaN	1.0282	0.38579	NaN	NaN
NaN	NaN	NaN	NaN	NaN	NaN	NaN	NaN	NaN	NaN	NaN	NaN	NaN	NaN	NaN	NaN	NaN	NaN	NaN	NaN	NaN	NaN	NaN	NaN	NaN	NaN	NaN	NaN	NaN	NaN	NaN	NaN	NaN	NaN	NaN	NaN	NaN	NaN	NaN	NaN	NaN	NaN	NaN	NaN	NaN	NaN	NaN	NaN	NaN	NaN
NaN	NaN	NaN	NaN	NaN	NaN	NaN	NaN	NaN	NaN	NaN	NaN	NaN	NaN	NaN	NaN	NaN	NaN	NaN	NaN	NaN	NaN	NaN	NaN	NaN	NaN	NaN	NaN	NaN	NaN	NaN	NaN	NaN	NaN	NaN	NaN	NaN	NaN	NaN	NaN	NaN	NaN	NaN	NaN	NaN	NaN	NaN	NaN	NaN	NaN
NaN	NaN	NaN	NaN	NaN	NaN	NaN	NaN	NaN	NaN	NaN	NaN	NaN	NaN	NaN	NaN	NaN	NaN	NaN	NaN	NaN	NaN	NaN	NaN	NaN	NaN	NaN	NaN	NaN	NaN	NaN	NaN	NaN	NaN	NaN	NaN	NaN	NaN	NaN	NaN	NaN	NaN	NaN	NaN	NaN	NaN	NaN	NaN	NaN	NaN
NaN	NaN	NaN	NaN	NaN	NaN	NaN	NaN	NaN	NaN	NaN	NaN	NaN	NaN	NaN	NaN	NaN	NaN	NaN	NaN	NaN	NaN	NaN	NaN	NaN	NaN	NaN	NaN	NaN	NaN	NaN	NaN	NaN	NaN	NaN	NaN	NaN	NaN	NaN	NaN	NaN	NaN	NaN	NaN	NaN	NaN	NaN	NaN	NaN	NaN
NaN	NaN	NaN	NaN	0.69284	NaN	NaN	NaN	NaN	NaN	NaN	NaN	NaN	NaN	NaN	NaN	NaN	NaN	NaN	NaN	NaN	NaN	NaN	NaN	NaN	NaN	NaN	NaN	NaN	NaN	NaN	NaN	NaN	NaN	NaN	NaN	NaN	NaN	NaN	NaN	NaN	NaN	NaN	NaN	NaN	NaN	NaN	NaN	NaN	NaN
NaN	NaN	NaN	NaN	0.69284	NaN	NaN	NaN	NaN	NaN	NaN	NaN	NaN	NaN	NaN	NaN	NaN	NaN	NaN	NaN	NaN	NaN	NaN	NaN	NaN	NaN	NaN	NaN	NaN	NaN	NaN	NaN	NaN	NaN	NaN	NaN	NaN	NaN	NaN	NaN	NaN	NaN	NaN	NaN	NaN	NaN	NaN	NaN	NaN	NaN
NaN	NaN	NaN	NaN	NaN	NaN	NaN	NaN	NaN	NaN	NaN	NaN	NaN	NaN	NaN	NaN	NaN	NaN	NaN	NaN	NaN	NaN	NaN	NaN	NaN	NaN	NaN	NaN	NaN	NaN	NaN	NaN	NaN	NaN	NaN	NaN	NaN	NaN	NaN	NaN	NaN	NaN	NaN	NaN	NaN	NaN	NaN	NaN	NaN	NaN
NaN	1.1915	NaN	NaN	NaN	NaN	NaN	NaN	NaN	NaN	NaN	NaN	NaN	NaN	NaN	NaN	1.3471	NaN	NaN	NaN	NaN	NaN	NaN	NaN	NaN	NaN	NaN	NaN	NaN	NaN	NaN	NaN	NaN	NaN	NaN	NaN	NaN	NaN	NaN	NaN	NaN	NaN	NaN	NaN	NaN	NaN	NaN	NaN	NaN	NaN
1.1986	1.0325	NaN	NaN	NaN	NaN	NaN	NaN	NaN	0.28213	NaN	NaN	NaN	NaN	NaN	NaN	2.1217	NaN	NaN	NaN	NaN	NaN	NaN	NaN	NaN	NaN	NaN	NaN	NaN	NaN	NaN	NaN	NaN	NaN	2.8635	NaN	1.1318	1.3044	1.4471	NaN	1.1501	0.70877	NaN	NaN	NaN	NaN	NaN	NaN	NaN	NaN
NaN	0.91144	NaN	NaN	0.56462	0.45821	NaN	NaN	NaN	NaN	0.089578	NaN	NaN	NaN	NaN	NaN	NaN	NaN	NaN	NaN	1.3007	1.1769	1.2795	NaN	1.054	NaN	NaN	NaN	NaN	NaN	NaN	NaN	0.02058	NaN	NaN	NaN	NaN	0.89946	NaN	NaN	NaN	NaN	NaN	NaN	0.24594	NaN	NaN	0.033605	NaN	NaN
1.0371	1.0907	0.98381	0.82102	0.84092	1.0415	0.98513	1.1051	0.9377	0.56658	1.0681	1.0093	0.99665	0.91742	0.91438	0.67275	1.339	0.60056	1.2777	1.326	1.4143	1.3196	1.6028	1.6431	1.5731	1.6275	1.5262	1.7684	1.7575	1.9322	1.0054	1.6735	1.5299	1.8045	1.6639	1.3568	1.0794	1.3949	1.0066	1.0297	0.996	1.1408	1.0738	1.0323	0.85364	0.8863	1.2248	1.1769	1.1918	1.3512
NaN	NaN	NaN	2.593	NaN	NaN	NaN	NaN	2.18	NaN	NaN	NaN	NaN	NaN	NaN	NaN	NaN	NaN	NaN	NaN	NaN	NaN	NaN	NaN	NaN	NaN	NaN	NaN	NaN	NaN	NaN	NaN	NaN	NaN	NaN	NaN	NaN	NaN	NaN	NaN	NaN	NaN	NaN	NaN	NaN	NaN	NaN	NaN	NaN	NaN
NaN	1.8172	0.74012	0.65698	NaN	NaN	NaN	NaN	0.49205	0.83558	0.82164	1.1294	NaN	1.0368	NaN	NaN	NaN	NaN	NaN	NaN	NaN	NaN	NaN	NaN	NaN	NaN	NaN	NaN	NaN	NaN	NaN	NaN	NaN	NaN	NaN	NaN	NaN	NaN	NaN	NaN	NaN	NaN	NaN	NaN	NaN	NaN	NaN	NaN	NaN	NaN
NaN	NaN	NaN	NaN	NaN	NaN	NaN	NaN	NaN	NaN	NaN	NaN	NaN	NaN	NaN	NaN	NaN	NaN	NaN	NaN	NaN	NaN	NaN	NaN	NaN	NaN	NaN	NaN	NaN	NaN	NaN	NaN	NaN	NaN	NaN	NaN	NaN	NaN	NaN	NaN	NaN	NaN	NaN	NaN	NaN	NaN	NaN	NaN	NaN	NaN
NaN	NaN	NaN	NaN	NaN	NaN	NaN	NaN	NaN	NaN	NaN	NaN	NaN	NaN	NaN	NaN	NaN	NaN	NaN	NaN	NaN	NaN	NaN	NaN	NaN	NaN	NaN	NaN	NaN	NaN	NaN	NaN	NaN	NaN	NaN	NaN	NaN	NaN	NaN	NaN	NaN	NaN	NaN	NaN	NaN	NaN	NaN	NaN	NaN	NaN
NaN	NaN	NaN	NaN	NaN	NaN	NaN	NaN	NaN	NaN	NaN	NaN	NaN	NaN	NaN	NaN	NaN	NaN	NaN	NaN	NaN	NaN	NaN	NaN	NaN	NaN	NaN	NaN	NaN	NaN	NaN	NaN	NaN	NaN	NaN	NaN	NaN	NaN	NaN	NaN	NaN	NaN	NaN	NaN	NaN	NaN	NaN	NaN	NaN	NaN
NaN	NaN	NaN	NaN	NaN	NaN	NaN	NaN	NaN	NaN	NaN	NaN	NaN	NaN	NaN	NaN	NaN	NaN	NaN	NaN	NaN	NaN	NaN	NaN	NaN	NaN	NaN	NaN	NaN	NaN	NaN	NaN	NaN	NaN	NaN	NaN	NaN	NaN	NaN	NaN	NaN	NaN	NaN	NaN	NaN	NaN	NaN	NaN	NaN	NaN
NaN	NaN	NaN	NaN	NaN	NaN	NaN	NaN	NaN	NaN	NaN	NaN	NaN	NaN	NaN	NaN	NaN	NaN	NaN	NaN	NaN	NaN	NaN	NaN	NaN	NaN	NaN	NaN	NaN	NaN	NaN	NaN	NaN	NaN	NaN	NaN	NaN	NaN	NaN	NaN	NaN	NaN	NaN	NaN	NaN	NaN	NaN	NaN	NaN	NaN
NaN	NaN	NaN	NaN	0.71656	0.55626	0.45337	0.45602	NaN	0.35229	0.34792	NaN	NaN	NaN	NaN	NaN	NaN	NaN	NaN	NaN	NaN	NaN	NaN	1.1948	1.1766	0.94353	0.88089	0.82343	NaN	NaN	0.38028	NaN	NaN	NaN	NaN	NaN	NaN	NaN	NaN	NaN	NaN	NaN	NaN	NaN	NaN	NaN	NaN	NaN	NaN	NaN
NaN	NaN	NaN	NaN	NaN	NaN	NaN	NaN	NaN	NaN	NaN	NaN	NaN	NaN	NaN	NaN	NaN	NaN	NaN	NaN	NaN	NaN	NaN	NaN	NaN	NaN	NaN	NaN	NaN	NaN	NaN	2.1762	NaN	NaN	NaN	NaN	NaN	NaN	NaN	NaN	NaN	NaN	NaN	NaN	NaN	NaN	NaN	NaN	NaN	NaN
NaN	NaN	NaN	NaN	NaN	NaN	NaN	NaN	NaN	NaN	NaN	NaN	NaN	NaN	NaN	NaN	NaN	NaN	NaN	NaN	NaN	NaN	NaN	NaN	NaN	NaN	2.013	NaN	NaN	NaN	NaN	2.1762	NaN	NaN	NaN	NaN	0.98427	NaN	NaN	NaN	1.0159	NaN	NaN	NaN	NaN	NaN	NaN	NaN	NaN	NaN
NaN	NaN	NaN	NaN	NaN	0.89697	NaN	NaN	NaN	NaN	NaN	NaN	NaN	NaN	0.6988	NaN	NaN	NaN	NaN	NaN	NaN	NaN	NaN	NaN	NaN	NaN	NaN	2.0553	NaN	NaN	NaN	NaN	NaN	NaN	NaN	NaN	NaN	NaN	NaN	NaN	NaN	NaN	NaN	NaN	NaN	NaN	1.5694	NaN	1.3632	1.6246
NaN	NaN	NaN	NaN	NaN	NaN	NaN	NaN	NaN	NaN	NaN	NaN	NaN	NaN	NaN	NaN	NaN	NaN	NaN	NaN	NaN	NaN	NaN	NaN	NaN	NaN	NaN	NaN	NaN	NaN	NaN	NaN	NaN	NaN	NaN	NaN	NaN	NaN	NaN	NaN	NaN	NaN	NaN	NaN	NaN	NaN	NaN	NaN	NaN	NaN
NaN	NaN	NaN	NaN	NaN	NaN	NaN	NaN	NaN	NaN	NaN	NaN	NaN	NaN	NaN	NaN	NaN	NaN	NaN	NaN	NaN	NaN	NaN	NaN	NaN	NaN	NaN	NaN	NaN	NaN	NaN	NaN	NaN	NaN	NaN	NaN	NaN	NaN	NaN	NaN	NaN	NaN	NaN	NaN	NaN	NaN	NaN	NaN	NaN	NaN
1.0937	1.2839	0.80418	NaN	0.99906	NaN	0.87856	NaN	0.48799	0.97835	0.94398	1.1818	1.0583	0.79625	0.86885	0.72509	1.14	NaN	1.1926	0.81111	0.9161	NaN	1.897	1.6181	1.2973	1.7229	1.5384	1.4755	0.95745	1.449	2.0093	1.2968	1.2587	1.5928	0.55442	1.0323	0.92806	1.3706	0.6284	0.86059	1.1977	0.88246	0.61677	0.54985	0.71572	0.76212	1.1967	1.2002	1.0705	1.0851
NaN	NaN	NaN	NaN	NaN	NaN	NaN	1.3652	NaN	NaN	NaN	0.60313	NaN	0.48831	0.21769	NaN	0.28882	NaN	NaN	1.9504	NaN	NaN	2.5976	1.8107	1.9855	1.8816	1.9626	NaN	NaN	NaN	1.2763	0.95729	0.77426	0.40494	NaN	NaN	NaN	NaN	NaN	NaN	NaN	NaN	1.011	NaN	1.0706	NaN	NaN	NaN	0.71144	0.63384
NaN	NaN	NaN	NaN	NaN	NaN	NaN	NaN	NaN	NaN	NaN	NaN	NaN	NaN	NaN	NaN	NaN	NaN	NaN	NaN	NaN	NaN	NaN	NaN	NaN	NaN	NaN	NaN	NaN	NaN	NaN	NaN	NaN	NaN	NaN	NaN	NaN	NaN	NaN	NaN	NaN	NaN	NaN	NaN	NaN	NaN	NaN	NaN	NaN	NaN
NaN	NaN	NaN	NaN	NaN	NaN	NaN	NaN	NaN	NaN	NaN	NaN	NaN	NaN	NaN	NaN	NaN	NaN	NaN	NaN	NaN	NaN	NaN	NaN	NaN	NaN	NaN	NaN	NaN	NaN	NaN	NaN	NaN	NaN	NaN	NaN	NaN	NaN	NaN	NaN	NaN	NaN	NaN	NaN	NaN	NaN	NaN	NaN	NaN	NaN
0.8534	1.6319	NaN	1.2515	1.298	1.0408	0.76715	NaN	0.70804	0.58359	0.54504	NaN	NaN	NaN	NaN	NaN	NaN	NaN	1.4077	NaN	1.4924	1.2575	2.2799	1.8899	2.0375	NaN	2.5714	1.6591	1.7249	0.74547	NaN	NaN	NaN	NaN	NaN	NaN	0.96926	1.5401	NaN	1.1723	NaN	1.2074	1.1545	1.9682	NaN	NaN	0.62978	0.19568	NaN	NaN
NaN	NaN	NaN	NaN	NaN	NaN	NaN	NaN	NaN	NaN	NaN	NaN	NaN	NaN	NaN	NaN	NaN	NaN	NaN	NaN	NaN	NaN	NaN	NaN	NaN	NaN	NaN	NaN	NaN	NaN	NaN	NaN	NaN	NaN	NaN	NaN	NaN	NaN	NaN	NaN	NaN	NaN	NaN	NaN	NaN	NaN	NaN	NaN	NaN	NaN
1.1186	1.3301	0.73399	0.84697	1.1064	0.91507	NaN	0.99864	1.0151	1.0819	NaN	0.95233	NaN	1.0983	0.87964	0.62321	NaN	0.47855	1.4304	NaN	0.94248	1.0659	NaN	NaN	NaN	NaN	1.7931	NaN	NaN	NaN	2.1598	2.322	2.0677	1.6045	0.95406	1.3762	NaN	1.3123	0.65305	0.89424	1.2951	NaN	1.0182	0.95685	1.1373	1.0996	1.3584	1.4015	NaN	1.3714
NaN	0.97226	0.58424	NaN	NaN	0.56327	0.31591	0.15111	NaN	NaN	NaN	NaN	NaN	NaN	NaN	NaN	NaN	NaN	NaN	1.2485	NaN	0.88783	1.1379	NaN	NaN	0.9547	NaN	NaN	0.57628	NaN	NaN	NaN	NaN	NaN	NaN	NaN	NaN	NaN	NaN	NaN	NaN	NaN	NaN	NaN	NaN	NaN	NaN	NaN	NaN	NaN
NaN	NaN	NaN	NaN	NaN	NaN	NaN	NaN	NaN	NaN	NaN	NaN	NaN	NaN	NaN	NaN	NaN	NaN	NaN	NaN	NaN	NaN	NaN	NaN	NaN	NaN	NaN	NaN	NaN	NaN	NaN	NaN	NaN	NaN	0.26775	NaN	NaN	NaN	NaN	NaN	0.78124	NaN	NaN	NaN	NaN	NaN	NaN	NaN	NaN	NaN
NaN	NaN	NaN	NaN	NaN	NaN	NaN	NaN	NaN	NaN	NaN	NaN	NaN	NaN	NaN	NaN	NaN	NaN	NaN	NaN	NaN	NaN	NaN	NaN	NaN	NaN	NaN	NaN	NaN	NaN	NaN	NaN	NaN	NaN	NaN	NaN	NaN	NaN	NaN	NaN	NaN	NaN	NaN	NaN	NaN	NaN	NaN	NaN	NaN	NaN
0.93622	1.3709	0.68582	NaN	0.79714	NaN	NaN	0.5792	0.69593	0.86278	0.93609	NaN	NaN	NaN	NaN	NaN	NaN	NaN	1.2284	1.7486	1.6091	2.2854	NaN	NaN	0.38133	NaN	NaN	NaN	1.9047	0.72469	NaN	1.1158	0.91161	NaN	0.36592	NaN	0.92813	1.5566	1.3153	0.814	0.61857	1.022	0.85447	NaN	0.82066	NaN	0.99935	0.97148	0.56022	NaN
0.77933	0.9865	NaN	0.86082	0.72734	1.2658	NaN	1.0303	0.87625	0.80016	1.3191	0.87538	0.97772	1.3719	NaN	0.65638	1.506	NaN	NaN	0.9206	NaN	NaN	NaN	1.3146	NaN	NaN	1.3216	1.6885	1.077	1.6583	1.6936	NaN	1.1754	1.8468	NaN	1.6149	NaN	NaN	NaN	NaN	0.83887	NaN	0.74424	NaN	NaN	NaN	0.94724	1.0096	0.88155	1.452
NaN	NaN	NaN	NaN	NaN	NaN	NaN	NaN	NaN	NaN	NaN	NaN	NaN	NaN	NaN	NaN	NaN	NaN	NaN	NaN	3.1412	2.8973	NaN	NaN	0.56219	NaN	NaN	0.55007	1.2992	NaN	NaN	NaN	NaN	0.38887	NaN	NaN	NaN	NaN	NaN	NaN	NaN	NaN	NaN	NaN	NaN	NaN	NaN	NaN	NaN	NaN
NaN	NaN	NaN	NaN	NaN	NaN	NaN	NaN	NaN	NaN	NaN	NaN	NaN	NaN	NaN	NaN	NaN	NaN	1.2793	NaN	NaN	NaN	NaN	NaN	1.455	NaN	1.3016	NaN	1.4348	1.6406	1.7103	1.5152	NaN	NaN	NaN	0.9409	NaN	NaN	NaN	NaN	NaN	NaN	NaN	NaN	NaN	NaN	NaN	NaN	NaN	NaN
NaN	NaN	NaN	NaN	NaN	NaN	NaN	NaN	NaN	NaN	NaN	NaN	NaN	NaN	NaN	NaN	NaN	NaN	NaN	NaN	NaN	NaN	NaN	1.4423	1.5029	1.8771	NaN	1.6168	NaN	1.4313	NaN	1.2673	NaN	NaN	NaN	0.9409	NaN	NaN	NaN	NaN	NaN	NaN	NaN	NaN	NaN	NaN	NaN	NaN	NaN	NaN
NaN	NaN	NaN	NaN	NaN	NaN	NaN	NaN	NaN	NaN	NaN	NaN	NaN	NaN	NaN	NaN	NaN	NaN	1.2793	NaN	NaN	NaN	NaN	1.4423	1.455	1.8771	1.3016	1.6168	1.4348	1.6406	1.7103	1.5152	NaN	NaN	NaN	0.9409	NaN	NaN	NaN	NaN	NaN	NaN	NaN	NaN	NaN	NaN	NaN	NaN	NaN	NaN
NaN	NaN	NaN	NaN	NaN	NaN	NaN	NaN	NaN	NaN	NaN	NaN	NaN	NaN	NaN	NaN	NaN	NaN	NaN	NaN	NaN	NaN	NaN	1.4423	1.5029	1.8771	NaN	1.6168	NaN	1.4313	NaN	1.2673	NaN	NaN	NaN	NaN	NaN	NaN	NaN	NaN	NaN	NaN	NaN	NaN	NaN	NaN	NaN	NaN	NaN	NaN
0.96478	0.94199	0.8828	1.2379	0.51405	0.60167	0.57954	0.67898	1.2114	0.6606	0.5029	NaN	0.71122	0.73725	0.6136	NaN	0.4374	0.52238	1.3109	3.3585	0.92473	1.2818	1.5815	2.2792	0.98861	1.1767	1.1364	NaN	1.8861	1.894	1.0974	1.7294	1.3814	1.3158	0.79429	0.59565	1.0549	1.0312	1.6698	1.0025	0.91742	1.0326	1.2552	1.9847	1.4351	0.811	1.4511	1.3531	0.88978	0.94567
NaN	NaN	NaN	NaN	NaN	NaN	NaN	NaN	NaN	0.62866	NaN	NaN	NaN	NaN	0.60558	NaN	NaN	NaN	NaN	NaN	NaN	NaN	NaN	NaN	NaN	1.2301	NaN	1.4446	NaN	NaN	NaN	NaN	1.7846	NaN	NaN	NaN	NaN	1.0475	1.7069	0.85314	NaN	1.0087	NaN	NaN	1.1988	NaN	NaN	NaN	NaN	1.088
NaN	NaN	NaN	NaN	NaN	NaN	NaN	NaN	NaN	NaN	NaN	NaN	NaN	NaN	NaN	NaN	NaN	NaN	NaN	NaN	NaN	NaN	NaN	NaN	NaN	NaN	NaN	NaN	NaN	NaN	NaN	NaN	NaN	NaN	NaN	NaN	NaN	NaN	NaN	NaN	NaN	NaN	NaN	NaN	NaN	NaN	NaN	NaN	NaN	NaN
NaN	NaN	NaN	NaN	NaN	NaN	NaN	NaN	NaN	NaN	NaN	NaN	NaN	NaN	NaN	NaN	NaN	NaN	1.3563	NaN	NaN	NaN	NaN	NaN	NaN	NaN	2.3169	1.7179	2.1158	NaN	NaN	3.5298	2.6759	3.1642	NaN	1.736	NaN	1.5282	NaN	NaN	NaN	NaN	NaN	NaN	NaN	NaN	NaN	NaN	NaN	NaN
NaN	NaN	NaN	NaN	NaN	NaN	NaN	NaN	NaN	NaN	NaN	NaN	NaN	NaN	NaN	NaN	NaN	NaN	NaN	NaN	NaN	NaN	NaN	NaN	NaN	NaN	NaN	NaN	NaN	NaN	NaN	NaN	NaN	NaN	NaN	NaN	NaN	NaN	NaN	NaN	NaN	NaN	NaN	NaN	NaN	NaN	NaN	NaN	NaN	NaN
NaN	NaN	NaN	NaN	NaN	NaN	NaN	NaN	NaN	NaN	NaN	NaN	NaN	NaN	NaN	NaN	NaN	NaN	NaN	NaN	NaN	NaN	1.7885	NaN	NaN	NaN	NaN	NaN	NaN	NaN	NaN	NaN	NaN	NaN	NaN	NaN	NaN	NaN	NaN	NaN	NaN	NaN	NaN	NaN	NaN	NaN	1.9315	NaN	NaN	NaN
NaN	NaN	NaN	NaN	NaN	NaN	0.72416	NaN	NaN	NaN	0.472	NaN	NaN	NaN	NaN	NaN	NaN	NaN	1.2833	NaN	1.0761	1.0002	NaN	1.3375	1.4442	NaN	1.3521	NaN	NaN	0.69041	0.36419	NaN	NaN	NaN	NaN	NaN	NaN	NaN	NaN	NaN	NaN	0.78255	NaN	NaN	NaN	NaN	NaN	NaN	NaN	NaN
0.95937	0.97758	NaN	0.69595	0.85967	NaN	0.7224	NaN	NaN	NaN	0.472	NaN	NaN	NaN	NaN	NaN	NaN	NaN	NaN	1.6213	1.0761	1.0002	1.5625	NaN	1.4442	1.4086	NaN	1.3553	NaN	0.69041	0.36419	NaN	NaN	NaN	NaN	NaN	0.99918	1.1492	0.90063	0.85752	0.8665	0.98537	0.85093	0.86602	0.74353	NaN	0.52647	0.25718	NaN	NaN
NaN	NaN	1.579	0.38396	1.2866	0.79534	0.85769	NaN	0.17041	0.18614	0.77909	0.68472	0.39463	0.24078	0.8018	0.42516	0.90013	0.5503	NaN	0.2946	1.9537	2.2045	NaN	0.22837	0.97759	0.91315	0.3594	0.915	2.2837	1.527	0.58569	NaN	0.49819	0.39281	2.4011	0.44533	1.021	NaN	1.572	0.81849	0.58489	NaN	1.6774	1.0902	NaN	NaN	0.56169	NaN	NaN	0.17837
NaN	NaN	NaN	NaN	NaN	NaN	NaN	NaN	NaN	NaN	NaN	NaN	NaN	NaN	NaN	NaN	NaN	NaN	NaN	NaN	NaN	NaN	NaN	NaN	NaN	NaN	NaN	NaN	NaN	NaN	NaN	NaN	NaN	NaN	NaN	NaN	NaN	NaN	NaN	NaN	NaN	NaN	NaN	NaN	NaN	NaN	NaN	NaN	NaN	1.7247
0.92315	NaN	NaN	0.79399	0.7937	0.93308	0.86167	1.0895	NaN	0.91847	NaN	NaN	1.0555	NaN	0.87181	0.69148	1.1917	0.61353	1.2608	1.1286	1.035	0.80618	2.0457	NaN	2.0326	NaN	1.7802	1.7817	NaN	NaN	NaN	1.9112	1.7304	1.8638	1.2641	1.6677	NaN	1.3056	0.91979	NaN	1.1701	1.2201	0.83181	NaN	1.1447	1.2265	1.137	1.0417	1.588	NaN
NaN	NaN	NaN	NaN	NaN	NaN	NaN	NaN	NaN	NaN	NaN	NaN	NaN	NaN	NaN	NaN	NaN	NaN	NaN	NaN	NaN	NaN	NaN	NaN	NaN	NaN	NaN	NaN	NaN	NaN	NaN	NaN	NaN	NaN	NaN	NaN	NaN	NaN	NaN	NaN	NaN	NaN	NaN	NaN	NaN	NaN	NaN	NaN	NaN	NaN
1.1135	1.0033	NaN	NaN	NaN	NaN	0.68676	0.78474	NaN	0.74157	0.58127	NaN	0.44649	0.29539	0.23182	NaN	0.13237	NaN	NaN	NaN	0.78489	NaN	NaN	NaN	NaN	NaN	2.0929	NaN	NaN	NaN	NaN	NaN	0.74478	0.43349	NaN	NaN	0.9512	1.3674	NaN	0.974	1.1958	NaN	0.84122	1.5027	1.0331	NaN	1.1259	0.9246	0.62513	NaN
0.76178	0.79724	0.6502	0.9232	0.4679	0.8091	0.83235	0.73154	0.87087	0.66948	0.43891	0.43462	0.44649	0.29539	0.23182	NaN	0.13237	NaN	1.2154	2.5286	0.62659	0.77187	1.9076	1.8727	1.4597	1.4818	1.7564	1.3608	1.1748	1.4326	1.206	1.0878	NaN	0.43349	NaN	0.19488	0.89366	0.9993	0.56695	0.89774	0.8293	1.0293	0.78089	0.80009	0.86527	0.96525	0.76588	NaN	NaN	0.50255
NaN	NaN	NaN	NaN	NaN	NaN	NaN	NaN	NaN	NaN	NaN	NaN	NaN	NaN	NaN	0.31045	NaN	0.20476	NaN	NaN	NaN	NaN	NaN	NaN	NaN	NaN	NaN	NaN	NaN	NaN	NaN	NaN	NaN	NaN	NaN	NaN	NaN	NaN	NaN	NaN	NaN	NaN	NaN	NaN	NaN	NaN	NaN	NaN	NaN	NaN
1.0126	0.83173	NaN	NaN	0.70937	NaN	NaN	NaN	NaN	NaN	0.60827	0.65413	NaN	NaN	NaN	NaN	0.396	NaN	1.2465	0.78966	NaN	1.1457	1.0805	NaN	NaN	NaN	NaN	NaN	NaN	NaN	NaN	0.93581	NaN	NaN	0.75342	NaN	1.0144	NaN	NaN	NaN	NaN	0.64664	NaN	NaN	NaN	NaN	0.60327	NaN	NaN	NaN
NaN	0.87238	0.70238	0.46058	NaN	0.72223	0.6821	0.64819	0.38219	0.46082	0.56447	NaN	0.53286	0.48899	0.40054	NaN	0.42165	NaN	1.3932	NaN	1.1642	1.0422	NaN	0.92938	1.1556	NaN	1.0397	1.1453	1.1743	NaN	1.1783	NaN	0.82105	0.71672	NaN	0.57466	NaN	NaN	0.65531	0.64178	0.77256	0.70477	0.62521	0.50107	NaN	0.72667	NaN	0.60301	0.68307	0.60455
1.0126	NaN	0.70238	0.44347	0.75397	NaN	0.63205	0.65082	0.38219	NaN	0.58596	0.65361	0.5076	0.48899	0.40054	NaN	NaN	0.20476	1.2465	NaN	1.1506	1.1457	1.0805	1.3153	NaN	1.0687	1.0397	NaN	1.2724	1.1556	1.1163	NaN	0.8155	0.71672	0.75342	0.48203	0.98099	NaN	0.69098	0.66393	0.78524	NaN	0.62521	0.43986	0.62876	0.70718	0.61996	0.68401	0.66669	0.71921
1.0811	0.85181	NaN	NaN	0.80138	0.68059	0.6821	NaN	NaN	NaN	0.56447	0.6531	0.48354	0.44782	0.40088	0.30534	0.396	0.19978	1.3932	0.78966	1.1371	1.0422	0.85925	0.92938	1.1556	1.3984	1.1512	1.1422	1.1743	1.1487	1.1163	0.86964	NaN	NaN	3.7816	0.57466	0.94869	0.9213	NaN	0.62038	0.78524	NaN	0.60242	0.5708	0.63243	0.74669	0.61996	0.68401	0.6507	0.71921
1.0811	NaN	0.7611	NaN	0.80138	NaN	NaN	0.64819	0.43443	NaN	NaN	NaN	NaN	NaN	0.40088	0.30534	NaN	NaN	NaN	NaN	NaN	NaN	NaN	NaN	1.1605	1.0327	NaN	NaN	NaN	NaN	NaN	NaN	0.82663	NaN	NaN	NaN	NaN	NaN	NaN	NaN	NaN	0.70477	NaN	NaN	NaN	NaN	NaN	NaN	NaN	NaN
1.0314	1.0376	0.90131	0.79573	1.2294	1.0548	0.99979	0.96196	NaN	0.65167	0.74709	0.62207	0.40861	NaN	NaN	NaN	NaN	NaN	1.1282	1.4169	1.4107	1.3229	1.6706	1.5442	1.6593	1.5367	1.5229	1.5576	1.8982	1.433	1.0539	0.52279	0.42848	NaN	NaN	NaN	1.1878	1.1494	NaN	1.1632	1.1033	1.2902	0.9458	NaN	NaN	0.81062	1.1388	NaN	NaN	NaN
NaN	NaN	NaN	NaN	NaN	NaN	NaN	NaN	NaN	NaN	NaN	NaN	NaN	NaN	NaN	NaN	NaN	NaN	1.5632	1.5847	NaN	NaN	0.85683	1.1745	NaN	NaN	NaN	NaN	NaN	NaN	NaN	NaN	NaN	NaN	NaN	NaN	NaN	NaN	NaN	NaN	NaN	NaN	NaN	NaN	NaN	NaN	NaN	NaN	NaN	NaN
0.99931	NaN	0.88692	NaN	NaN	NaN	NaN	NaN	2.5319	0.78118	2.0456	NaN	NaN	NaN	0.89839	2.5994	NaN	NaN	NaN	NaN	NaN	NaN	NaN	1.4531	NaN	NaN	NaN	1.5425	NaN	NaN	2.6121	NaN	2.0489	2.0714	NaN	6.7081	NaN	NaN	NaN	NaN	NaN	NaN	NaN	NaN	NaN	NaN	NaN	NaN	NaN	NaN
0.97957	0.89162	0.73979	0.64226	0.72593	0.76915	0.85342	0.79971	0.66083	0.67512	0.71224	0.75344	0.41299	0.51917	0.52419	0.18575	NaN	NaN	1.0954	1.4445	1.1529	1.4823	NaN	1.3661	1.178	1.2154	1.1834	1.3229	1.5587	1.3408	1.0843	1.2071	0.827	NaN	NaN	0.61285	0.75723	NaN	1.0621	0.84481	NaN	1.0322	0.99851	0.83063	0.79215	0.65322	0.90768	0.81219	0.70656	0.80628
NaN	NaN	NaN	0.73999	NaN	NaN	1.2155	NaN	0.95436	0.95828	0.61697	NaN	NaN	NaN	NaN	NaN	NaN	NaN	NaN	NaN	NaN	NaN	NaN	NaN	NaN	NaN	NaN	NaN	NaN	NaN	NaN	NaN	NaN	NaN	NaN	NaN	NaN	NaN	NaN	NaN	NaN	NaN	NaN	NaN	NaN	NaN	NaN	NaN	NaN	NaN
NaN	NaN	NaN	NaN	NaN	NaN	NaN	NaN	NaN	NaN	NaN	1.5895	NaN	NaN	NaN	2.2889	3.8901	NaN	NaN	NaN	NaN	NaN	NaN	NaN	NaN	NaN	NaN	NaN	NaN	NaN	NaN	NaN	NaN	NaN	NaN	NaN	NaN	NaN	NaN	NaN	NaN	NaN	NaN	NaN	NaN	NaN	NaN	NaN	NaN	NaN
NaN	NaN	NaN	0.73999	NaN	NaN	1.2155	NaN	0.95436	0.95828	0.61697	NaN	NaN	NaN	NaN	NaN	NaN	NaN	NaN	NaN	NaN	NaN	NaN	NaN	NaN	NaN	NaN	NaN	NaN	NaN	NaN	NaN	NaN	NaN	NaN	NaN	NaN	NaN	NaN	NaN	NaN	NaN	NaN	NaN	NaN	NaN	NaN	NaN	NaN	NaN
NaN	NaN	NaN	NaN	NaN	NaN	NaN	NaN	NaN	NaN	NaN	NaN	NaN	NaN	NaN	NaN	NaN	NaN	NaN	NaN	1.5763	1.5862	NaN	1.3316	NaN	NaN	1.8337	NaN	NaN	NaN	1.941	1.8344	2.359	2.0127	NaN	NaN	NaN	NaN	NaN	NaN	NaN	NaN	NaN	NaN	NaN	NaN	NaN	NaN	NaN	NaN
NaN	NaN	NaN	NaN	NaN	NaN	NaN	NaN	NaN	NaN	NaN	NaN	NaN	NaN	NaN	NaN	NaN	NaN	NaN	NaN	NaN	NaN	NaN	NaN	NaN	NaN	NaN	NaN	NaN	NaN	NaN	NaN	NaN	NaN	NaN	NaN	NaN	NaN	NaN	NaN	NaN	NaN	NaN	NaN	NaN	NaN	NaN	NaN	NaN	NaN
NaN	NaN	NaN	NaN	NaN	NaN	NaN	NaN	NaN	NaN	NaN	NaN	NaN	NaN	NaN	NaN	NaN	NaN	NaN	NaN	NaN	NaN	NaN	NaN	NaN	NaN	NaN	NaN	NaN	NaN	NaN	NaN	NaN	NaN	NaN	NaN	NaN	NaN	NaN	NaN	NaN	NaN	NaN	NaN	NaN	NaN	NaN	NaN	NaN	NaN
NaN	NaN	NaN	NaN	NaN	NaN	NaN	NaN	NaN	NaN	NaN	NaN	NaN	NaN	NaN	NaN	NaN	NaN	NaN	NaN	NaN	NaN	NaN	NaN	NaN	NaN	NaN	NaN	NaN	NaN	NaN	NaN	NaN	NaN	NaN	NaN	NaN	NaN	NaN	NaN	NaN	NaN	NaN	NaN	NaN	NaN	NaN	NaN	NaN	NaN
1.1812	1.5185	0.72614	1.0787	0.99622	0.97891	0.80392	0.91933	0.74184	0.74654	0.60168	0.53194	0.43029	0.45085	NaN	0.23237	0.41401	NaN	1.1519	2.8669	NaN	0.85161	NaN	2.1435	1.9784	1.5559	1.8112	1.7176	0.87242	1.0332	NaN	0.89299	NaN	NaN	NaN	NaN	1.1408	1.6693	NaN	NaN	1.3627	1.2844	0.87756	0.8432	0.96248	0.91895	NaN	0.81269	NaN	0.51775
0.7571	1.1447	0.81328	NaN	1.478	0.81553	0.51692	0.75719	NaN	NaN	NaN	NaN	NaN	NaN	NaN	NaN	NaN	NaN	1.0116	NaN	1.0391	NaN	1.621	1.0965	1.5284	1.8503	1.5622	1.2242	NaN	NaN	NaN	NaN	NaN	NaN	NaN	NaN	NaN	NaN	NaN	NaN	NaN	NaN	NaN	NaN	NaN	NaN	NaN	NaN	NaN	NaN
1.1187	1.1257	0.65496	1.1646	0.68456	0.95534	0.84747	0.96316	0.82497	0.71276	0.70844	0.33022	0.50886	NaN	NaN	NaN	NaN	NaN	1.2514	2.1262	0.75	0.89945	1.3679	2.9752	1.9944	1.7994	1.2958	NaN	1.7263	1.7498	0.91669	NaN	NaN	NaN	NaN	NaN	1.1121	1.6689	1.1478	1.4095	1.0298	1.2498	1.0366	0.87518	1.3211	1.2201	0.67514	0.48352	NaN	NaN
1.0557	1.034	0.83761	0.75566	0.84188	0.82286	0.60767	0.59311	0.41467	0.29155	0.20565	NaN	NaN	NaN	NaN	NaN	NaN	NaN	1.3169	1.347	1.6839	1.3172	NaN	1.3073	1.34	1.4753	1.1864	1.2179	1.0013	NaN	NaN	NaN	NaN	NaN	NaN	NaN	1.1077	1.1489	0.9106	0.93671	0.91591	NaN	0.81363	0.57931	0.4192	NaN	NaN	NaN	NaN	NaN
NaN	0.81652	0.72206	0.53065	0.63622	0.56222	0.51737	0.7022	0.49061	0.43961	0.47737	0.35791	0.26507	0.17612	0.11396	NaN	NaN	NaN	1.4	1.2644	1.3365	1.2669	1.5292	1.3829	1.4592	1.0941	0.96013	1.3214	1.2005	0.96782	0.73701	0.48594	NaN	0.2832	0.20954	NaN	1.1175	0.72555	NaN	0.84932	0.86758	0.85501	0.82379	0.71675	0.86619	0.66988	0.6916	NaN	0.44077	NaN
1.078	0.77125	0.75451	0.51062	0.61529	0.64278	0.54064	0.67389	0.50099	0.43115	0.46938	0.38894	0.24672	0.17612	0.10665	NaN	NaN	NaN	1.4	1.2644	1.3365	1.2669	1.5292	1.3829	1.4592	1.0941	0.96013	1.3214	1.2005	0.96782	0.73701	0.48594	NaN	0.2832	0.20954	NaN	1.1175	0.72555	NaN	0.84932	0.86758	0.85501	0.82379	0.71675	0.86619	0.66988	0.6916	NaN	0.44077	NaN
1.0395	1.1154	0.6767	0.82122	0.60841	0.68028	0.44462	0.39046	0.17978	0.11348	NaN	NaN	NaN	NaN	NaN	NaN	NaN	NaN	1.1269	2.988	0.98138	0.65859	1.8982	1.8972	1.8547	1.2178	1.7525	0.9303	0.60356	NaN	NaN	NaN	NaN	NaN	NaN	NaN	0.84807	NaN	0.80596	1.1774	1.0246	0.98712	0.59511	0.52793	0.24134	0.10651	NaN	NaN	NaN	NaN
1.087	1.0977	1.0086	0.99059	1.0597	1.1729	0.85502	1.0952	0.68703	0.7851	0.94222	0.72949	0.97633	0.99428	0.91416	0.57941	1.223	0.4653	1.7995	1.7049	1.1419	0.90293	3.7262	1.8022	2.0025	1.8109	1.7803	1.9889	1.8021	2.3733	1.9981	2.0906	1.8601	1.7682	1.2778	1.3096	1.0544	1.5128	1.1182	1.133	1.0452	1.1352	1.1476	0.95189	1.3568	1.0286	1.3421	1.5099	1.2558	1.5477
1.0439	NaN	0.78643	NaN	0.80218	NaN	0.7122	0.90599	0.67781	NaN	0.83272	0.8278	NaN	NaN	NaN	0.39761	NaN	0.20696	1.1543	1.3106	NaN	NaN	1.7309	NaN	1.326	1.2692	1.2873	1.6497	NaN	1.6457	1.2283	1.3556	1.1709	NaN	NaN	NaN	1.0694	NaN	1.3712	1.087	0.94605	0.93699	0.97228	0.95194	0.70629	0.90811	1.3097	0.96433	0.87548	1.0139
NaN	NaN	NaN	NaN	NaN	NaN	NaN	NaN	NaN	0.82419	NaN	NaN	NaN	NaN	NaN	NaN	NaN	NaN	NaN	NaN	NaN	NaN	NaN	NaN	NaN	NaN	NaN	NaN	NaN	NaN	NaN	NaN	NaN	NaN	NaN	NaN	NaN	NaN	NaN	NaN	NaN	NaN	NaN	NaN	0.9598	NaN	NaN	NaN	NaN	NaN
1.0452	0.93986	1.0988	0.85598	0.63852	NaN	0.73964	0.94126	0.70631	0.82419	0.82517	0.5753	0.56482	0.60746	0.36974	NaN	0.29711	NaN	1.1857	1.6359	1.2821	1.6071	1.7388	1.3834	1.2959	1.1776	1.9435	1.535	1.4459	1.744	1.1041	1.065	0.86638	0.74809	0.50263	0.43515	0.98629	1.4574	0.92192	1.0443	0.70564	0.92194	0.9482	1.2025	0.73396	0.97521	0.78672	0.87308	0.84744	0.45692
NaN	NaN	NaN	NaN	0.85398	NaN	0.5309	NaN	NaN	NaN	NaN	NaN	NaN	NaN	NaN	NaN	NaN	NaN	1.3612	0.91288	NaN	NaN	NaN	1.1058	NaN	0.97698	NaN	NaN	1.0314	NaN	NaN	NaN	NaN	NaN	NaN	NaN	NaN	NaN	NaN	NaN	NaN	0.73515	NaN	0.53808	NaN	NaN	NaN	NaN	NaN	NaN
NaN	NaN	NaN	NaN	NaN	NaN	NaN	NaN	NaN	NaN	NaN	NaN	NaN	NaN	NaN	NaN	NaN	NaN	NaN	NaN	NaN	NaN	NaN	NaN	NaN	NaN	NaN	NaN	NaN	NaN	NaN	NaN	NaN	NaN	NaN	NaN	NaN	NaN	NaN	NaN	NaN	NaN	NaN	NaN	NaN	NaN	NaN	NaN	NaN	NaN
NaN	NaN	NaN	NaN	NaN	NaN	NaN	NaN	NaN	NaN	NaN	NaN	NaN	NaN	NaN	NaN	NaN	NaN	1.4065	1.3753	1.2267	NaN	1.1438	NaN	1.448	1.4087	NaN	1.0074	1.7969	NaN	NaN	NaN	NaN	NaN	NaN	NaN	NaN	NaN	NaN	NaN	NaN	NaN	NaN	NaN	NaN	NaN	NaN	NaN	NaN	NaN
NaN	NaN	NaN	NaN	NaN	NaN	NaN	NaN	NaN	NaN	NaN	NaN	NaN	NaN	NaN	NaN	NaN	NaN	NaN	NaN	NaN	NaN	NaN	NaN	NaN	NaN	NaN	NaN	NaN	NaN	NaN	NaN	NaN	NaN	NaN	NaN	NaN	NaN	NaN	NaN	NaN	NaN	NaN	NaN	NaN	NaN	NaN	NaN	NaN	NaN
NaN	NaN	NaN	NaN	NaN	NaN	NaN	NaN	NaN	NaN	NaN	NaN	NaN	NaN	NaN	NaN	NaN	NaN	NaN	NaN	NaN	NaN	NaN	NaN	NaN	NaN	NaN	NaN	NaN	NaN	NaN	NaN	NaN	NaN	NaN	1.387	NaN	NaN	NaN	NaN	NaN	NaN	NaN	NaN	NaN	NaN	NaN	NaN	NaN	NaN
NaN	NaN	NaN	NaN	NaN	NaN	NaN	NaN	NaN	NaN	NaN	NaN	NaN	NaN	NaN	NaN	NaN	NaN	NaN	NaN	NaN	NaN	NaN	NaN	NaN	NaN	NaN	NaN	NaN	NaN	NaN	NaN	NaN	NaN	NaN	NaN	NaN	NaN	NaN	NaN	NaN	NaN	NaN	NaN	1.7932	1.1004	1.1154	NaN	0.87722	NaN
NaN	NaN	NaN	NaN	0.99735	NaN	NaN	NaN	NaN	NaN	NaN	0.85604	NaN	NaN	NaN	NaN	NaN	NaN	NaN	2.2399	NaN	NaN	NaN	NaN	NaN	NaN	NaN	NaN	NaN	NaN	NaN	NaN	NaN	NaN	NaN	NaN	NaN	NaN	NaN	NaN	NaN	NaN	NaN	NaN	NaN	NaN	NaN	NaN	NaN	NaN
0.98465	1.1284	0.68086	1.2427	0.43489	0.90293	0.90082	1.015	0.54528	0.80356	0.66423	0.58769	0.84717	1.0359	0.72762	0.56483	0.87133	0.21168	1.1986	3.8695	1.1211	1.829	1.6804	3.2991	2.7026	1.5891	2.4763	2.8688	2.2817	2.1115	2.0642	3.3823	2.7686	2.6942	1.831	1.7869	0.95264	1.8162	0.71089	1.0952	0.57361	1.7086	1.4903	2.1613	1.5936	1.5459	1.1363	1.419	1.2215	2.1723
1.0207	1.1217	1.015	0.47784	1.052	0.9712	0.93103	1.0717	0.4081	0.79643	0.92939	0.95225	0.98417	0.87039	0.88247	0.64401	1.1475	0.58756	1.2225	0.76095	1.2752	1.3126	1.4746	1.1816	1.6059	1.6218	1.458	1.5689	1.5367	1.8345	1.7343	1.2794	1.416	1.603	1.4398	1.1686	1.0106	1.2131	1.0685	0.97082	1.1011	1.0819	0.93736	0.51161	0.8829	0.95823	1.1824	1.2757	1.202	1.2788
NaN	NaN	0.5729	NaN	1.1002	NaN	NaN	0.97497	NaN	NaN	0.72619	1.0372	NaN	0.81009	NaN	0.44154	NaN	NaN	NaN	NaN	NaN	NaN	NaN	0.94371	NaN	NaN	0.87498	0.90847	NaN	NaN	NaN	NaN	1.0171	0.98406	NaN	0.90854	NaN	1.3656	1.1657	NaN	1.2961	0.77965	NaN	NaN	NaN	1.0504	NaN	1.2167	NaN	0.93314
0.97217	0.91095	0.76453	0.80983	0.86297	0.85395	0.80806	0.80397	1.4172	0.75003	0.69101	0.82026	0.85009	0.91218	0.97335	0.53635	1.1573	0.82606	1.3232	1.8355	1.4868	1.1891	1.5803	1.1495	1.5334	1.4578	1.4547	1.4031	1.3598	1.5391	1.4721	1.7303	1.6493	1.3251	1.5196	1.2897	1.0233	1.2056	0.95972	1.0275	0.91171	0.94974	1.1265	1.168	1.1124	1.1777	0.87036	1.2665	1.4188	1.3426
NaN	NaN	NaN	NaN	NaN	NaN	NaN	NaN	NaN	NaN	NaN	NaN	NaN	NaN	NaN	NaN	NaN	0.85089	NaN	NaN	NaN	NaN	NaN	NaN	NaN	NaN	NaN	NaN	NaN	NaN	NaN	NaN	NaN	1.293	NaN	NaN	NaN	NaN	NaN	NaN	NaN	NaN	NaN	NaN	NaN	NaN	NaN	NaN	NaN	NaN
NaN	NaN	0.6223	NaN	NaN	NaN	NaN	NaN	NaN	NaN	NaN	NaN	NaN	NaN	NaN	NaN	NaN	NaN	0.93662	1.1207	NaN	0.90054	NaN	0.93255	1.3656	1.1443	1.3985	NaN	1.7163	NaN	NaN	NaN	NaN	NaN	NaN	NaN	NaN	NaN	NaN	NaN	NaN	NaN	NaN	NaN	NaN	NaN	NaN	NaN	NaN	NaN
0.97441	NaN	1.0623	NaN	0.99589	1.0927	NaN	1.1429	0.57159	0.85096	1.1165	0.64551	0.42917	NaN	NaN	NaN	NaN	NaN	NaN	NaN	1.3415	1.2387	1.7823	1.6014	1.9072	NaN	1.7737	1.9906	2.0533	2.2387	1.3201	0.73445	NaN	NaN	NaN	0.34524	NaN	NaN	NaN	NaN	1.0433	1.0854	NaN	NaN	NaN	0.87696	NaN	NaN	NaN	NaN
NaN	NaN	NaN	NaN	NaN	NaN	NaN	NaN	NaN	NaN	NaN	NaN	NaN	NaN	NaN	NaN	NaN	NaN	NaN	NaN	NaN	NaN	NaN	NaN	NaN	NaN	NaN	NaN	NaN	NaN	NaN	NaN	NaN	NaN	NaN	NaN	NaN	NaN	NaN	NaN	NaN	NaN	NaN	NaN	NaN	NaN	NaN	NaN	NaN	NaN
NaN	NaN	NaN	NaN	NaN	NaN	NaN	NaN	NaN	NaN	NaN	NaN	NaN	NaN	NaN	NaN	NaN	NaN	NaN	NaN	NaN	NaN	NaN	NaN	NaN	NaN	NaN	NaN	NaN	NaN	NaN	NaN	NaN	NaN	NaN	NaN	NaN	NaN	NaN	NaN	NaN	NaN	NaN	NaN	NaN	NaN	NaN	NaN	NaN	NaN
NaN	NaN	NaN	NaN	NaN	NaN	NaN	NaN	NaN	NaN	NaN	NaN	NaN	NaN	NaN	NaN	NaN	NaN	NaN	NaN	NaN	NaN	NaN	NaN	NaN	NaN	NaN	NaN	NaN	NaN	NaN	NaN	NaN	NaN	NaN	NaN	NaN	NaN	NaN	NaN	NaN	NaN	NaN	NaN	NaN	NaN	NaN	NaN	NaN	NaN
NaN	NaN	NaN	NaN	NaN	NaN	NaN	NaN	NaN	NaN	NaN	NaN	NaN	NaN	NaN	NaN	NaN	NaN	NaN	NaN	NaN	NaN	NaN	NaN	NaN	NaN	NaN	NaN	NaN	NaN	NaN	NaN	NaN	NaN	NaN	NaN	NaN	NaN	NaN	NaN	NaN	NaN	NaN	NaN	NaN	NaN	NaN	NaN	NaN	NaN
NaN	1.0703	NaN	0.055478	1.1619	0.78705	NaN	1.0803	0.72719	NaN	NaN	NaN	NaN	NaN	NaN	1.4673	NaN	0.33646	5.2642	2.7689	NaN	0.68995	1.3261	3.1452	NaN	0.12853	NaN	NaN	2.4866	NaN	1.5697	NaN	1.7934	2.1348	NaN	NaN	NaN	2.0035	NaN	NaN	NaN	NaN	NaN	NaN	1.9103	1.0854	NaN	1.4356	1.3045	1.6192
1.0066	1.2734	0.75617	0.95953	0.81118	0.97211	0.87026	0.94482	1.133	0.92545	0.83072	0.5833	0.96738	1.2577	0.93711	0.6884	1.1729	0.4694	1.373	2.8003	0.94773	1.1636	1.8546	2.2882	1.6308	2.0442	2.0407	1.9574	1.6578	2.5677	1.9621	2.9214	2.8092	2.6614	1.3935	1.8294	0.82156	NaN	0.81452	1.1937	0.84855	1.3661	1.0965	1.2896	1.3817	1.2639	1.6729	1.8098	1.6326	2.2706
NaN	NaN	NaN	NaN	NaN	NaN	NaN	NaN	NaN	NaN	NaN	NaN	NaN	NaN	NaN	NaN	NaN	NaN	NaN	NaN	NaN	NaN	NaN	NaN	NaN	NaN	NaN	NaN	NaN	NaN	NaN	NaN	NaN	NaN	NaN	NaN	NaN	NaN	NaN	NaN	NaN	NaN	NaN	NaN	NaN	NaN	NaN	NaN	NaN	NaN
NaN	NaN	NaN	NaN	NaN	NaN	NaN	NaN	NaN	NaN	NaN	NaN	NaN	NaN	NaN	NaN	NaN	NaN	NaN	NaN	NaN	NaN	NaN	NaN	NaN	NaN	NaN	NaN	NaN	NaN	NaN	NaN	NaN	NaN	NaN	NaN	NaN	NaN	NaN	NaN	NaN	NaN	NaN	NaN	NaN	NaN	NaN	NaN	NaN	NaN
1.0344	1.1665	0.83439	0.71308	0.80312	1.0506	1.0172	NaN	0.48518	0.5463	NaN	NaN	NaN	NaN	NaN	NaN	NaN	NaN	1.2759	2.0316	NaN	0.71038	3.0347	1.8651	1.5677	1.1386	1.5972	1.3301	0.69092	NaN	NaN	NaN	NaN	NaN	NaN	NaN	1.1909	1.5567	NaN	NaN	0.91229	NaN	NaN	NaN	NaN	NaN	NaN	NaN	NaN	NaN
1.0284	1.0797	0.9008	0.7418	0.83188	0.83092	0.78024	0.92706	0.62438	0.675	0.77377	0.70252	0.79758	0.77321	0.69173	0.48778	0.75479	0.26717	1.2983	1.5317	1.2089	1.6272	1.5008	1.4587	1.5971	1.5067	1.5547	1.5566	1.695	1.9661	1.6885	1.6888	1.6316	1.5279	1.5331	1.0871	1.0686	1.0071	1.0497	0.89015	0.83573	0.8644	1.1639	1.0096	0.87021	1.0132	1.0164	0.88693	1.208	1.1889
NaN	NaN	NaN	NaN	NaN	NaN	NaN	NaN	NaN	NaN	NaN	NaN	NaN	NaN	NaN	NaN	NaN	NaN	NaN	NaN	NaN	NaN	NaN	NaN	NaN	NaN	NaN	NaN	NaN	NaN	NaN	NaN	NaN	NaN	NaN	NaN	NaN	NaN	NaN	NaN	1.3649	NaN	NaN	NaN	NaN	NaN	NaN	NaN	NaN	NaN
NaN	NaN	NaN	NaN	NaN	0.87904	0.66007	NaN	NaN	NaN	NaN	NaN	0.74498	0.83237	0.78979	0.53193	NaN	0.72602	NaN	NaN	NaN	NaN	NaN	NaN	1.4738	NaN	NaN	NaN	NaN	NaN	1.8858	NaN	1.8416	1.293	0.91435	1.4529	NaN	0.99188	NaN	NaN	NaN	NaN	NaN	NaN	0.96574	NaN	NaN	1.3965	1.5554	1.5054
0.95279	1.1032	NaN	NaN	NaN	NaN	NaN	0.89247	NaN	NaN	NaN	NaN	NaN	1.0671	0.72179	0.54035	NaN	0.31027	NaN	NaN	NaN	NaN	NaN	NaN	NaN	NaN	NaN	1.9882	NaN	NaN	NaN	NaN	2.3224	1.9574	NaN	1.8845	NaN	1.4057	NaN	NaN	NaN	NaN	NaN	NaN	NaN	NaN	NaN	1.289	NaN	1.5238
NaN	NaN	NaN	NaN	NaN	NaN	NaN	NaN	NaN	NaN	NaN	NaN	NaN	NaN	NaN	NaN	NaN	NaN	NaN	NaN	NaN	NaN	NaN	NaN	NaN	NaN	NaN	NaN	NaN	NaN	NaN	NaN	NaN	NaN	NaN	NaN	NaN	NaN	NaN	NaN	NaN	NaN	NaN	NaN	NaN	NaN	NaN	NaN	NaN	NaN
NaN	NaN	NaN	NaN	NaN	NaN	NaN	NaN	NaN	NaN	NaN	NaN	NaN	NaN	NaN	NaN	NaN	NaN	NaN	NaN	NaN	NaN	NaN	NaN	NaN	NaN	NaN	NaN	NaN	NaN	NaN	NaN	NaN	NaN	NaN	NaN	NaN	NaN	NaN	NaN	NaN	NaN	NaN	NaN	NaN	NaN	NaN	NaN	NaN	NaN
NaN	NaN	NaN	NaN	NaN	NaN	NaN	NaN	NaN	NaN	NaN	NaN	NaN	NaN	NaN	NaN	NaN	NaN	NaN	NaN	NaN	NaN	NaN	NaN	NaN	NaN	NaN	NaN	NaN	NaN	NaN	NaN	NaN	NaN	NaN	NaN	NaN	NaN	NaN	NaN	NaN	NaN	NaN	NaN	NaN	NaN	NaN	NaN	NaN	NaN
NaN	1.3964	NaN	1.0188	NaN	NaN	NaN	NaN	0.65878	0.94662	NaN	0.8495	NaN	NaN	NaN	NaN	NaN	NaN	NaN	NaN	NaN	NaN	NaN	NaN	NaN	NaN	NaN	NaN	NaN	NaN	NaN	NaN	NaN	NaN	NaN	NaN	NaN	NaN	NaN	NaN	NaN	NaN	NaN	NaN	NaN	NaN	NaN	NaN	NaN	NaN
0.96072	1.0119	0.87451	0.77261	1.0402	0.97812	0.75069	0.9152	NaN	0.77162	0.8193	0.86997	0.75952	0.74276	0.78493	0.44102	0.92736	0.34656	1.3921	1.5223	1.3849	1.5549	1.6685	NaN	1.5739	1.6696	1.4494	1.6191	1.7256	1.9351	1.3922	1.3732	1.457	1.3619	1.4194	0.93054	1.0772	1.1231	0.95052	0.99022	1.1118	0.96693	1.1645	NaN	0.86377	0.9248	1.342	1.1845	1.1182	1.1048
NaN	0.77944	NaN	NaN	NaN	NaN	NaN	NaN	0.73916	NaN	0.86761	NaN	NaN	NaN	NaN	0.76565	NaN	NaN	NaN	NaN	NaN	NaN	NaN	NaN	NaN	NaN	NaN	NaN	NaN	NaN	NaN	NaN	NaN	NaN	NaN	NaN	NaN	NaN	NaN	NaN	NaN	NaN	NaN	NaN	NaN	NaN	NaN	NaN	NaN	NaN
0.97844	1.8434	0.90847	NaN	NaN	NaN	NaN	NaN	NaN	NaN	NaN	NaN	NaN	NaN	NaN	NaN	NaN	NaN	NaN	NaN	NaN	NaN	NaN	NaN	NaN	NaN	NaN	NaN	NaN	NaN	NaN	NaN	NaN	NaN	NaN	NaN	NaN	NaN	NaN	NaN	NaN	NaN	NaN	NaN	NaN	NaN	NaN	NaN	NaN	NaN
0.94117	1.3165	0.87802	1.7574	0.69046	0.91389	0.82134	0.87022	1.5715	0.96801	0.69994	0.79011	0.91988	1.2946	1.1306	0.69327	1.2625	0.67123	1.182	4.6687	1.0884	1.3422	1.9607	3.1843	1.4855	1.4987	1.5881	1.7618	1.9202	1.9705	1.6714	2.6558	2.9242	2.8319	1.9909	1.7075	0.92981	1.5293	2.2891	1.1692	0.82261	1.3029	1.6659	3.3257	1.6109	1.425	2.4132	2.1756	1.5999	1.6326
NaN	NaN	NaN	NaN	NaN	NaN	NaN	NaN	NaN	NaN	NaN	NaN	NaN	NaN	NaN	NaN	NaN	NaN	0.65118	NaN	6.0629	NaN	NaN	NaN	0.74794	NaN	NaN	NaN	1.1945	NaN	NaN	NaN	NaN	NaN	NaN	NaN	NaN	NaN	NaN	NaN	2.7873	NaN	NaN	NaN	NaN	0.77992	3.4908	NaN	NaN	NaN
0.93854	0.90837	0.74208	0.76778	0.8072	0.89973	0.65643	0.96719	0.79318	0.74627	0.82848	0.95127	0.98917	1.1581	0.85229	0.96141	1.4233	1.2051	1.3193	1.7838	0.97762	0.78924	NaN	1.5154	1.2049	1.5117	1.7045	1.6065	1.3765	1.6134	2.2172	2.0434	2.1832	2.2196	1.8537	2.1027	0.87999	NaN	0.7892	0.7765	0.86926	0.9418	0.7294	1.498	1.2183	1.8152	1.1494	1.3959	1.3844	1.2899
0.99443	0.99743	0.6714	0.94837	0.78943	0.98998	0.7595	0.77893	0.6971	0.6595	0.76487	0.94076	1.0075	1.2103	1.1767	1.2753	1.8101	1.2323	1.3011	1.5555	1.1992	0.97322	1.4835	1.5785	1.5007	1.4626	1.5912	1.5894	1.5045	1.7152	1.5994	1.6332	1.5886	1.8654	1.7692	1.5371	1.1552	1.1089	1.0046	1.1188	0.95358	0.9418	0.95553	1.0325	1.0824	0.98195	1.1101	1.2888	1.334	1.2619
0.93854	NaN	NaN	NaN	0.8072	NaN	NaN	0.96719	NaN	NaN	NaN	0.79055	NaN	1.2093	NaN	NaN	NaN	1.2051	NaN	1.7838	NaN	NaN	NaN	NaN	1.2049	NaN	NaN	NaN	NaN	NaN	NaN	NaN	NaN	NaN	NaN	NaN	NaN	NaN	NaN	NaN	NaN	NaN	NaN	NaN	NaN	NaN	1.1565	NaN	NaN	NaN
0.86552	0.83086	0.7222	0.47466	0.51688	0.61803	0.54564	0.57653	0.34961	0.44769	0.48759	0.31906	0.41223	0.33842	0.2653	0.11825	0.19486	0.057731	1.061	0.89317	0.98532	1.2052	1.207	1.1342	1.2259	1.4001	1.3528	1.3176	1.3255	1.1895	0.75671	0.95433	0.67485	0.54792	0.43885	0.47666	0.92055	1.0509	0.9784	0.84104	0.58635	0.86696	0.76905	0.34645	0.67091	0.53744	0.6704	0.59002	0.56118	0.38082
0.8649	0.90852	0.79996	0.56085	0.75154	0.88642	0.79768	0.81893	0.55671	0.68242	0.83159	0.81466	0.83407	0.85097	0.84241	0.68175	1.1615	0.38956	1.1004	1.0745	1.2151	1.2162	1.3597	1.2019	1.2936	1.3491	1.2669	1.3478	1.444	1.5828	1.5665	1.5315	1.3697	1.6775	1.5042	1.3069	0.91654	1.1548	0.85754	0.80032	0.841	0.84605	0.81789	0.62021	0.69784	0.7168	1.0478	1.1391	0.97225	1.1071
0.92873	0.92804	0.76256	0.39875	1.0068	0.93455	0.76467	0.85976	0.37221	0.52318	0.89142	0.86294	0.62879	0.62013	0.70598	0.59731	0.89348	0.44289	1.1805	NaN	1.214	0.91192	NaN	0.92252	1.2784	1.3417	1.2903	1.2496	1.1923	1.5063	1.5119	1.0739	0.99544	1.2165	1.0023	0.95934	1.0378	NaN	0.57061	NaN	1.1694	NaN	NaN	NaN	NaN	0.5577	NaN	1.2816	NaN	0.76766
1.1379	1.1996	0.6646	0.98947	0.90381	0.93204	NaN	NaN	1.053	1.0865	0.84735	1.012	0.92223	1.1582	1.0226	0.62496	1.0268	NaN	1.6889	2.56	0.84586	0.84582	2.2855	2.4294	1.5526	1.5361	1.6968	1.858	1.5551	2.1457	2.1236	NaN	2.7737	2.2767	NaN	1.407	1.0732	1.4211	0.74398	1.0871	0.92332	1.3085	0.76308	0.99121	1.0166	1.5598	1.5161	1.8249	1.4619	1.779
0.98728	1.3559	1.5168	NaN	NaN	NaN	NaN	NaN	NaN	NaN	NaN	NaN	NaN	1.7189	2.1068	1.0896	NaN	0.71546	NaN	NaN	NaN	NaN	NaN	NaN	NaN	NaN	NaN	NaN	NaN	NaN	NaN	NaN	NaN	NaN	NaN	NaN	0.82304	NaN	NaN	NaN	2.6066	NaN	NaN	NaN	NaN	NaN	NaN	NaN	NaN	2.1901
NaN	1.0927	1.066	1.2125	2.4824	2.2703	1.8912	2.1989	1.3029	1.2767	1.5612	1.1921	NaN	NaN	NaN	NaN	NaN	NaN	NaN	NaN	NaN	1.9823	NaN	3.4312	4.0615	NaN	NaN	5.9802	NaN	1.9951	1.4955	NaN	NaN	NaN	NaN	NaN	NaN	NaN	NaN	NaN	NaN	NaN	NaN	NaN	NaN	NaN	NaN	NaN	NaN	NaN
0.92514	0.96786	0.78141	0.72267	0.82625	0.77779	0.71943	0.83166	0.5528	0.47251	0.56397	0.50661	0.31467	0.20402	0.15012	0.092108	0.14916	0.052894	1.2623	1.61	1.2997	1.4183	1.5014	1.2844	1.3569	1.292	1.1672	1.4424	1.5393	1.0917	0.75873	0.51873	0.38454	0.25861	0.18729	0.15004	0.87379	1.0731	0.95288	0.9166	0.83003	0.80664	0.75082	0.70048	0.5915	0.59524	0.73908	0.48314	0.33014	0.28451
NaN	NaN	NaN	NaN	NaN	NaN	NaN	NaN	NaN	NaN	NaN	NaN	NaN	NaN	NaN	NaN	NaN	NaN	1.2396	0.81746	NaN	NaN	NaN	NaN	NaN	NaN	NaN	NaN	NaN	NaN	NaN	NaN	NaN	NaN	NaN	NaN	NaN	NaN	NaN	NaN	NaN	NaN	NaN	NaN	NaN	NaN	NaN	NaN	NaN	NaN
NaN	NaN	NaN	NaN	NaN	NaN	NaN	NaN	NaN	NaN	NaN	NaN	NaN	NaN	NaN	NaN	NaN	NaN	NaN	NaN	NaN	NaN	NaN	NaN	NaN	NaN	NaN	NaN	NaN	NaN	NaN	NaN	NaN	NaN	NaN	NaN	NaN	NaN	NaN	NaN	NaN	NaN	NaN	NaN	NaN	NaN	NaN	NaN	NaN	NaN
0.49734	0.61877	0.55788	0.48692	0.84638	1.1159	0.82321	0.46993	0.75538	0.68511	0.61392	0.81636	0.90244	0.7462	NaN	NaN	1.0077	NaN	NaN	NaN	NaN	NaN	NaN	NaN	NaN	NaN	NaN	NaN	NaN	NaN	1.2802	NaN	NaN	NaN	NaN	NaN	NaN	NaN	NaN	NaN	NaN	NaN	NaN	NaN	NaN	NaN	0.86199	1.0226	NaN	1.1198
NaN	NaN	NaN	NaN	NaN	NaN	NaN	NaN	NaN	NaN	NaN	NaN	NaN	NaN	NaN	NaN	NaN	NaN	NaN	0.91684	0.35423	0.30784	NaN	NaN	NaN	NaN	NaN	NaN	NaN	NaN	NaN	NaN	NaN	NaN	NaN	NaN	NaN	NaN	NaN	NaN	NaN	NaN	NaN	NaN	NaN	NaN	NaN	NaN	NaN	NaN
NaN	NaN	NaN	NaN	NaN	NaN	NaN	NaN	NaN	NaN	NaN	NaN	NaN	NaN	NaN	NaN	NaN	NaN	1.0886	NaN	0.35423	NaN	NaN	NaN	NaN	NaN	NaN	NaN	NaN	NaN	NaN	NaN	NaN	NaN	NaN	NaN	NaN	NaN	NaN	NaN	NaN	NaN	NaN	NaN	NaN	NaN	NaN	NaN	NaN	NaN
NaN	NaN	NaN	NaN	NaN	NaN	NaN	NaN	NaN	NaN	NaN	NaN	NaN	0.4871	NaN	NaN	NaN	NaN	NaN	1.3609	NaN	NaN	NaN	NaN	NaN	1.1584	NaN	NaN	1.1669	NaN	NaN	0.93896	NaN	NaN	NaN	NaN	NaN	NaN	0.7585	NaN	NaN	0.57379	NaN	NaN	0.68999	NaN	NaN	NaN	0.64805	NaN
NaN	NaN	NaN	0.5374	NaN	NaN	0.61699	NaN	NaN	NaN	NaN	NaN	0.62999	NaN	NaN	NaN	NaN	NaN	NaN	NaN	NaN	NaN	NaN	NaN	NaN	NaN	NaN	NaN	NaN	NaN	1.1258	NaN	NaN	NaN	NaN	NaN	NaN	NaN	NaN	NaN	NaN	NaN	NaN	NaN	NaN	NaN	NaN	NaN	NaN	NaN
NaN	NaN	NaN	NaN	1.1388	NaN	NaN	NaN	NaN	NaN	NaN	NaN	NaN	NaN	NaN	NaN	NaN	NaN	NaN	NaN	1.4058	NaN	NaN	NaN	NaN	NaN	NaN	NaN	NaN	NaN	NaN	NaN	NaN	NaN	NaN	NaN	NaN	0.90334	NaN	NaN	NaN	NaN	NaN	NaN	NaN	NaN	NaN	NaN	NaN	NaN
0.98217	1.1404	0.96497	0.81764	0.95088	0.99868	0.7337	0.8977	0.76207	0.73864	0.88069	0.88159	0.77798	0.79851	0.74441	0.39422	0.78243	NaN	1.4495	2.2781	1.5993	1.3681	1.7707	1.4935	1.6037	1.7323	1.4854	2.1654	2.1171	2.2479	1.9006	1.7626	1.454	1.484	1.0431	0.90724	0.8875	1.2889	1.1605	1.1648	1.0314	1.2074	1.1186	1.5384	1.0165	0.993	1.6292	1.7369	1.2341	1.4315
NaN	NaN	0.61463	0.69847	NaN	NaN	NaN	0.302	0.40577	0.15918	NaN	NaN	NaN	NaN	NaN	NaN	NaN	NaN	NaN	NaN	0.83963	NaN	NaN	2.1586	1.5273	0.68852	NaN	NaN	NaN	NaN	NaN	NaN	NaN	NaN	NaN	NaN	1.5326	NaN	1.0621	1.087	NaN	0.86362	0.81679	NaN	0.45402	NaN	NaN	NaN	NaN	NaN
1.1437	1.0066	0.65265	0.69847	0.41071	0.40706	NaN	0.42932	0.40577	0.15918	0.12015	NaN	NaN	NaN	NaN	NaN	NaN	NaN	1.3529	1.2491	1.0118	0.98066	NaN	2.1586	0.92171	0.74946	0.88021	0.72855	NaN	0.34258	NaN	NaN	NaN	NaN	NaN	NaN	1.2928	0.53873	1.0621	1.087	0.57974	0.86362	0.5758	0.98732	0.45402	NaN	NaN	NaN	NaN	NaN
0.93461	1.151	1.0914	1.0655	1.0272	1.2661	1.1114	1.5115	1.0329	0.91294	1.137	0.84786	0.73645	0.86886	0.7701	0.39118	0.74517	0.24111	1.2943	1.7142	1.1302	1.6988	1.9172	1.8999	1.7747	1.5035	1.7393	2.0424	2.2677	2.1618	2.2521	2.0472	0.90796	1.027	0.91534	0.76166	1.256	1.0651	1.3609	1.2289	1.1919	1.1307	1.4517	1.0763	1.2142	0.88647	NaN	1.235	1.0692	0.86214
NaN	NaN	NaN	NaN	NaN	NaN	NaN	NaN	NaN	NaN	NaN	NaN	NaN	NaN	NaN	NaN	NaN	NaN	NaN	NaN	NaN	NaN	NaN	NaN	NaN	NaN	NaN	NaN	NaN	NaN	NaN	NaN	NaN	NaN	NaN	NaN	NaN	NaN	NaN	NaN	NaN	NaN	NaN	NaN	NaN	NaN	NaN	NaN	NaN	NaN
0.98205	NaN	NaN	NaN	NaN	NaN	NaN	NaN	NaN	NaN	NaN	NaN	NaN	NaN	NaN	NaN	NaN	NaN	1.3609	0.32988	NaN	NaN	NaN	NaN	NaN	NaN	NaN	NaN	NaN	NaN	NaN	NaN	NaN	NaN	NaN	NaN	0.99382	NaN	NaN	NaN	NaN	NaN	NaN	NaN	NaN	NaN	NaN	NaN	NaN	NaN
NaN	NaN	NaN	NaN	NaN	NaN	NaN	NaN	NaN	NaN	NaN	NaN	NaN	NaN	NaN	NaN	NaN	NaN	NaN	NaN	NaN	NaN	NaN	NaN	NaN	NaN	NaN	NaN	NaN	NaN	NaN	NaN	NaN	NaN	NaN	NaN	NaN	NaN	NaN	NaN	NaN	NaN	NaN	NaN	NaN	NaN	NaN	NaN	NaN	NaN
NaN	NaN	NaN	NaN	NaN	NaN	NaN	NaN	NaN	NaN	NaN	NaN	NaN	NaN	NaN	NaN	NaN	NaN	NaN	NaN	NaN	NaN	NaN	NaN	NaN	NaN	NaN	NaN	NaN	NaN	NaN	NaN	NaN	NaN	NaN	NaN	NaN	NaN	NaN	NaN	NaN	NaN	NaN	NaN	NaN	NaN	NaN	NaN	NaN	NaN
NaN	NaN	NaN	NaN	NaN	NaN	NaN	NaN	NaN	NaN	NaN	NaN	NaN	NaN	NaN	NaN	NaN	NaN	NaN	NaN	NaN	NaN	NaN	NaN	NaN	NaN	NaN	NaN	NaN	NaN	NaN	NaN	NaN	NaN	NaN	NaN	NaN	NaN	NaN	NaN	NaN	NaN	NaN	NaN	NaN	NaN	NaN	NaN	NaN	NaN
NaN	NaN	NaN	NaN	NaN	NaN	NaN	NaN	NaN	NaN	NaN	NaN	NaN	NaN	NaN	NaN	NaN	NaN	NaN	NaN	NaN	NaN	NaN	NaN	NaN	NaN	NaN	NaN	NaN	NaN	NaN	NaN	NaN	NaN	NaN	NaN	1.8414	NaN	NaN	NaN	NaN	NaN	NaN	NaN	NaN	NaN	NaN	NaN	NaN	NaN
NaN	1.1772	1.3586	NaN	1.0038	0.55737	0.55984	NaN	NaN	0.70574	NaN	NaN	NaN	NaN	NaN	NaN	NaN	NaN	NaN	NaN	1.1545	NaN	NaN	NaN	NaN	1.8141	1.4602	1.391	1.5751	2.0524	NaN	NaN	1.5295	0.878	NaN	NaN	1.84	1.2215	1.2535	NaN	NaN	NaN	NaN	NaN	NaN	NaN	NaN	NaN	NaN	1.0282
NaN	NaN	NaN	NaN	NaN	NaN	0.55984	NaN	NaN	NaN	NaN	NaN	0.63403	NaN	NaN	NaN	NaN	NaN	NaN	NaN	NaN	NaN	NaN	NaN	NaN	NaN	NaN	NaN	NaN	NaN	NaN	NaN	NaN	NaN	NaN	NaN	NaN	NaN	NaN	NaN	NaN	NaN	NaN	NaN	NaN	NaN	NaN	NaN	NaN	NaN
NaN	NaN	NaN	NaN	NaN	NaN	NaN	NaN	NaN	NaN	NaN	NaN	NaN	NaN	NaN	NaN	NaN	NaN	NaN	NaN	NaN	NaN	NaN	NaN	NaN	NaN	NaN	NaN	NaN	NaN	NaN	NaN	NaN	NaN	NaN	NaN	NaN	NaN	NaN	NaN	NaN	NaN	NaN	NaN	NaN	NaN	NaN	NaN	NaN	NaN
NaN	NaN	NaN	NaN	0.85668	NaN	NaN	NaN	NaN	NaN	NaN	NaN	NaN	NaN	NaN	NaN	NaN	NaN	NaN	NaN	NaN	NaN	NaN	NaN	NaN	NaN	NaN	NaN	NaN	NaN	1.0207	NaN	NaN	NaN	NaN	NaN	NaN	1.2654	NaN	1.103	0.91808	NaN	NaN	NaN	NaN	NaN	NaN	NaN	NaN	NaN
NaN	NaN	NaN	NaN	NaN	NaN	NaN	NaN	NaN	NaN	NaN	NaN	NaN	NaN	NaN	NaN	NaN	NaN	NaN	NaN	3.4474	NaN	NaN	NaN	NaN	NaN	NaN	NaN	NaN	NaN	NaN	2.2566	NaN	NaN	NaN	2.3331	NaN	NaN	NaN	NaN	NaN	NaN	NaN	NaN	NaN	NaN	NaN	NaN	NaN	NaN
NaN	NaN	NaN	NaN	NaN	NaN	NaN	NaN	NaN	NaN	NaN	NaN	NaN	NaN	NaN	NaN	NaN	NaN	NaN	NaN	NaN	NaN	NaN	NaN	NaN	NaN	NaN	NaN	NaN	NaN	NaN	NaN	NaN	NaN	NaN	2.089	NaN	NaN	NaN	NaN	NaN	NaN	NaN	NaN	NaN	NaN	NaN	NaN	NaN	NaN
0.97732	1.1102	1.0027	0.68113	1.0903	0.92906	1.0262	1.1643	0.79018	NaN	1.0085	1.1331	1.1445	NaN	NaN	0.94834	1.7715	NaN	1.1957	1.1198	1.6614	1.1654	1.421	NaN	1.6101	NaN	1.4143	1.7213	1.6693	1.8862	1.9984	2.1559	1.9168	2.2924	2.0175	NaN	0.92481	NaN	0.91266	0.81294	1.1662	NaN	0.8725	NaN	NaN	0.71194	1.1575	NaN	1.1797	1.3565
NaN	NaN	NaN	NaN	NaN	NaN	NaN	NaN	NaN	NaN	NaN	NaN	NaN	NaN	NaN	NaN	NaN	NaN	NaN	NaN	NaN	NaN	NaN	NaN	NaN	NaN	NaN	NaN	NaN	NaN	NaN	NaN	NaN	NaN	NaN	NaN	NaN	NaN	NaN	NaN	NaN	NaN	NaN	0.75163	0.73325	NaN	NaN	1.3092	NaN	NaN
NaN	NaN	NaN	NaN	NaN	NaN	NaN	NaN	NaN	NaN	NaN	NaN	NaN	NaN	NaN	NaN	NaN	NaN	NaN	NaN	NaN	NaN	NaN	NaN	0.84252	NaN	NaN	NaN	NaN	NaN	NaN	0.75996	0.68314	0.67146	NaN	0.22687	NaN	NaN	NaN	NaN	NaN	NaN	NaN	NaN	NaN	NaN	NaN	NaN	NaN	NaN
0.97079	0.71088	0.99299	0.43775	1.1953	0.80791	0.70076	0.91488	0.37433	0.56135	0.90656	1.2691	0.77206	0.64603	0.59609	0.3423	0.68503	0.24133	0.9705	0.65511	0.89911	0.71271	0.8519	0.76134	NaN	1.292	0.76919	1.0464	NaN	1.4531	1.1865	NaN	NaN	NaN	NaN	NaN	NaN	0.8201	0.89494	0.61882	0.9269	0.71771	0.59402	0.24865	NaN	NaN	1.4214	0.99137	0.83104	0.62054
NaN	NaN	NaN	NaN	NaN	NaN	NaN	NaN	NaN	NaN	NaN	NaN	NaN	NaN	NaN	NaN	NaN	NaN	NaN	NaN	NaN	NaN	NaN	NaN	NaN	NaN	NaN	NaN	NaN	NaN	NaN	NaN	NaN	NaN	NaN	NaN	NaN	NaN	NaN	NaN	NaN	NaN	NaN	NaN	NaN	NaN	NaN	NaN	NaN	NaN
NaN	NaN	NaN	NaN	NaN	1.0231	NaN	NaN	NaN	NaN	NaN	NaN	NaN	NaN	NaN	NaN	NaN	NaN	NaN	2.7924	NaN	0.85213	NaN	NaN	NaN	1.7895	NaN	NaN	NaN	1.8229	2.212	NaN	NaN	NaN	NaN	NaN	1.0012	NaN	1.0696	NaN	NaN	NaN	NaN	NaN	NaN	NaN	NaN	1.54	NaN	NaN
0.98676	0.86017	NaN	0.93162	NaN	NaN	NaN	NaN	0.82663	NaN	NaN	NaN	1.0847	0.97461	NaN	NaN	0.92108	NaN	NaN	NaN	NaN	NaN	NaN	2.497	NaN	NaN	2.5209	NaN	1.5402	1.6116	2.031	NaN	1.7511	NaN	NaN	1.0882	NaN	NaN	NaN	NaN	1.1007	NaN	NaN	NaN	1.1228	0.97783	1.5412	NaN	1.0847	1.2633
0.94539	0.92252	0.77607	0.54456	0.64169	0.789	0.69307	0.85424	0.30416	0.67502	0.77347	1.218	0.91576	0.73578	0.95862	0.54752	0.9376	0.45328	1.2458	1.177	1.1481	0.83313	1.8979	1.6008	1.4061	1.2962	1.4693	1.9704	1.3527	1.7499	1.5661	1.528	1.77	1.798	1.1841	0.88365	0.97142	2.0106	0.68382	0.76108	0.9332	1.2505	0.7453	0.8398	0.66816	0.64322	1.1416	1.0012	1.4106	1.602
0.98381	1.0401	0.71548	1.1817	0.5085	0.78689	0.70478	0.78445	1.3025	0.74305	0.63624	0.24775	0.82642	NaN	0.44687	0.60359	0.71366	0.26544	1.2054	3.0725	0.82904	0.96931	2.7911	2.8664	1.4459	1.0904	1.9153	NaN	1.968	2.2867	1.6802	2.7904	2.247	1.6602	1.5793	NaN	1.0151	1.3753	1.0872	1.02	0.5682	1.2308	1.375	1.7454	1.0512	0.92582	0.81259	1.8087	1.556	NaN
0.98311	NaN	0.92333	NaN	NaN	0.82144	0.82077	NaN	NaN	0.72866	NaN	NaN	NaN	NaN	NaN	NaN	NaN	NaN	NaN	NaN	NaN	NaN	NaN	NaN	NaN	NaN	NaN	2.2179	NaN	NaN	NaN	NaN	NaN	NaN	NaN	NaN	NaN	0.86543	NaN	NaN	NaN	NaN	NaN	NaN	NaN	NaN	NaN	NaN	NaN	NaN
NaN	NaN	NaN	NaN	NaN	NaN	NaN	NaN	NaN	NaN	NaN	NaN	NaN	NaN	NaN	NaN	NaN	NaN	NaN	NaN	NaN	NaN	NaN	NaN	NaN	NaN	NaN	0.91505	NaN	NaN	NaN	NaN	NaN	NaN	NaN	NaN	NaN	NaN	NaN	NaN	NaN	NaN	NaN	NaN	NaN	NaN	NaN	NaN	NaN	NaN
NaN	NaN	NaN	NaN	NaN	NaN	NaN	NaN	NaN	NaN	NaN	NaN	NaN	NaN	NaN	NaN	NaN	NaN	NaN	NaN	NaN	NaN	NaN	NaN	NaN	NaN	NaN	NaN	NaN	NaN	NaN	NaN	NaN	2.1627	NaN	NaN	NaN	NaN	NaN	NaN	NaN	NaN	NaN	NaN	NaN	NaN	NaN	NaN	NaN	NaN
NaN	NaN	NaN	NaN	NaN	NaN	NaN	NaN	NaN	NaN	NaN	NaN	NaN	NaN	NaN	NaN	NaN	NaN	NaN	NaN	NaN	NaN	NaN	NaN	NaN	NaN	NaN	NaN	NaN	NaN	NaN	NaN	NaN	NaN	NaN	NaN	NaN	NaN	NaN	NaN	NaN	NaN	NaN	NaN	NaN	NaN	NaN	NaN	NaN	NaN
NaN	NaN	NaN	NaN	NaN	NaN	NaN	NaN	NaN	NaN	NaN	NaN	NaN	NaN	NaN	NaN	NaN	NaN	NaN	NaN	NaN	NaN	NaN	NaN	NaN	NaN	NaN	NaN	NaN	NaN	NaN	NaN	NaN	NaN	NaN	NaN	NaN	NaN	NaN	NaN	NaN	NaN	NaN	NaN	NaN	NaN	NaN	NaN	NaN	NaN
NaN	NaN	0.62447	0.80901	NaN	0.89571	NaN	NaN	0.76311	0.79075	NaN	0.52681	0.56424	NaN	0.26851	NaN	0.26931	NaN	NaN	2.3206	NaN	NaN	1.2966	1.8774	1.5822	1.4935	2.1475	NaN	1.2399	1.6869	1.3104	1.1189	0.733	0.57183	NaN	0.48999	1.1319	1.668	0.69894	0.80024	NaN	1.0587	0.90223	1.0169	1.0013	NaN	NaN	0.9289	0.65995	0.6452
0.92314	0.98953	0.86042	0.65731	0.82016	0.78457	0.75973	0.78058	0.71296	0.63436	0.71744	0.76843	0.76542	0.69453	0.55679	0.4247	0.46486	0.22525	1.2554	1.2923	1.4007	1.2828	1.4335	1.347	1.0813	1.2965	1.044	1.3986	1.3144	1.4393	0.95114	1.1356	1.0792	0.7882	0.75831	0.59075	1.0462	0.96411	1.0759	1.1054	0.75001	1.0112	0.93785	0.93715	1.0522	0.98054	0.91875	1.0431	1.0111	1.0142
NaN	0.77907	NaN	NaN	NaN	NaN	0.64806	0.81734	0.79351	NaN	NaN	NaN	1.0372	0.76814	NaN	0.72048	NaN	0.77452	1.4556	NaN	NaN	1.479	NaN	NaN	NaN	1.5902	NaN	1.5242	NaN	NaN	NaN	1.5807	NaN	1.2433	NaN	0.88882	NaN	NaN	NaN	NaN	NaN	NaN	NaN	NaN	NaN	NaN	NaN	NaN	NaN	NaN
NaN	0.77907	NaN	NaN	NaN	NaN	0.64806	NaN	NaN	NaN	NaN	NaN	1.0372	0.76814	NaN	0.72048	NaN	0.77452	1.4556	NaN	NaN	1.479	NaN	NaN	NaN	1.5902	NaN	1.5242	NaN	NaN	NaN	1.5807	NaN	1.2433	NaN	0.88882	NaN	NaN	NaN	NaN	NaN	NaN	NaN	NaN	NaN	NaN	NaN	NaN	NaN	NaN
NaN	0.77907	NaN	NaN	NaN	NaN	0.64806	0.81734	0.79351	NaN	NaN	NaN	1.0372	NaN	NaN	0.72048	NaN	0.77452	NaN	NaN	NaN	NaN	NaN	NaN	NaN	1.5902	NaN	1.5242	NaN	NaN	NaN	NaN	NaN	NaN	NaN	NaN	NaN	NaN	NaN	NaN	NaN	NaN	NaN	NaN	NaN	NaN	NaN	NaN	NaN	NaN
NaN	NaN	NaN	NaN	NaN	NaN	NaN	NaN	NaN	NaN	NaN	NaN	NaN	NaN	NaN	NaN	NaN	NaN	NaN	NaN	NaN	NaN	NaN	NaN	1.6348	NaN	NaN	NaN	NaN	NaN	NaN	NaN	NaN	NaN	NaN	NaN	NaN	NaN	NaN	NaN	NaN	NaN	NaN	NaN	NaN	NaN	NaN	NaN	NaN	NaN
NaN	NaN	NaN	NaN	NaN	NaN	NaN	NaN	NaN	0.68394	NaN	NaN	0.81822	0.82631	0.89942	NaN	NaN	0.48099	1.2624	NaN	NaN	NaN	NaN	NaN	NaN	1.4803	NaN	NaN	NaN	NaN	1.608	NaN	NaN	NaN	1.551	1.3197	0.97784	1.1272	0.93928	NaN	NaN	NaN	NaN	NaN	NaN	0.76591	NaN	NaN	NaN	NaN
1.25	1.0372	0.82236	NaN	1.113	0.80126	0.75844	NaN	0.49432	0.7449	0.91063	NaN	0.70701	NaN	0.86688	0.82449	1.0754	0.60224	NaN	NaN	NaN	NaN	NaN	NaN	NaN	NaN	NaN	NaN	NaN	NaN	NaN	NaN	1.3618	NaN	NaN	NaN	NaN	NaN	NaN	NaN	NaN	NaN	NaN	NaN	NaN	NaN	NaN	NaN	NaN	NaN
NaN	NaN	2.2121	NaN	NaN	NaN	NaN	NaN	NaN	NaN	NaN	NaN	NaN	NaN	NaN	0.89496	NaN	1.3305	NaN	NaN	NaN	NaN	NaN	NaN	NaN	NaN	NaN	NaN	1.7491	NaN	NaN	NaN	NaN	NaN	NaN	NaN	NaN	NaN	NaN	NaN	NaN	NaN	NaN	NaN	NaN	NaN	NaN	NaN	NaN	NaN
1.0131	1.1097	0.74915	1.1256	0.76765	0.96188	0.81251	1.0358	NaN	1.1141	0.99858	0.82416	0.89114	1.1181	0.90105	0.63126	NaN	0.43749	1.4992	2.6534	0.84636	0.88955	1.6924	2.7807	1.7988	1.861	NaN	2.3532	1.668	2.2904	2.1589	3.0181	2.5247	NaN	1.2861	2.0759	0.90023	1.7367	0.88023	1.075	1.0828	1.2184	0.93578	1.0332	1.2941	1.2676	1.6636	1.8956	1.7458	2.0462
0.94716	1.1103	1.0711	0.79344	1.0948	1.2912	1.0786	1.1789	1.2004	1.5952	2.0243	0.98163	2.9458	5.1258	0.76992	0.6242	5.3566	0.49301	1.5197	1.664	1.7951	1.8528	1.8059	1.7782	1.8372	1.5494	1.8478	2.5004	1.8317	2.1619	1.9089	5.6682	7.1647	9.489	9.556	7.5794	0.99436	1.5638	1.1552	1.0567	1.247	1.3152	1.0786	1.0183	0.98682	1.6456	1.7489	2.3429	2.667	3.1931
0.91221	0.94361	0.8969	0.62293	0.86996	0.95602	0.83709	1.0433	0.7105	0.85119	0.95179	0.9408	0.8309	0.73504	0.73608	0.58762	1.0296	0.46751	1.2654	1.1369	1.3785	1.389	1.7194	1.4224	1.4228	1.5494	1.5162	1.8026	1.8317	2.1619	1.9089	1.6024	1.5448	1.5077	1.4548	1.1498	0.98851	1.1648	0.9263	0.97707	0.9801	0.94045	0.94417	0.72919	0.9276	0.95471	1.2456	1.2126	1.1461	1.1431
1.0634	1.1648	0.72379	NaN	0.71439	0.72406	1.058	0.80596	1.0035	0.8079	NaN	0.59716	0.97093	0.87289	0.69884	0.61639	1.0857	NaN	2.024	2.5539	0.53463	0.88088	NaN	2.5625	1.5112	2.1431	2.143	1.8674	NaN	2.1418	1.9471	NaN	NaN	2.2533	0.89392	1.9989	NaN	NaN	NaN	NaN	NaN	NaN	NaN	NaN	NaN	NaN	NaN	NaN	NaN	NaN
0.83361	1.333	0.76011	0.82669	0.61552	0.97567	0.78369	0.98365	0.7178	0.75229	0.80107	0.40637	0.4038	0.82518	0.59762	0.34878	0.59894	0.25332	0.6385	1.5845	1.1678	1.5521	1.8244	1.3228	1.022	1.0459	0.84823	1.4539	1.5043	1.3875	1.0348	1.2127	1.1862	1.1656	1.1849	0.5294	NaN	1.7122	0.70285	0.85923	NaN	NaN	1.2848	NaN	NaN	1.0319	0.65902	1.4293	1.2675	1.6678
NaN	NaN	NaN	NaN	NaN	NaN	NaN	NaN	NaN	NaN	NaN	NaN	NaN	NaN	NaN	NaN	NaN	NaN	NaN	NaN	NaN	NaN	NaN	NaN	NaN	NaN	1.6516	NaN	NaN	NaN	NaN	NaN	NaN	NaN	NaN	NaN	NaN	NaN	NaN	NaN	NaN	NaN	NaN	NaN	NaN	NaN	NaN	NaN	NaN	NaN
NaN	NaN	NaN	1.3108	NaN	NaN	NaN	NaN	NaN	NaN	NaN	NaN	1.3421	NaN	NaN	NaN	NaN	NaN	NaN	NaN	NaN	0.87215	NaN	NaN	NaN	NaN	NaN	NaN	NaN	1.8077	NaN	NaN	NaN	NaN	1.4638	NaN	NaN	NaN	NaN	NaN	NaN	NaN	NaN	NaN	NaN	1.8441	NaN	NaN	NaN	1.804
NaN	NaN	NaN	NaN	NaN	NaN	NaN	NaN	NaN	NaN	NaN	NaN	NaN	NaN	NaN	NaN	NaN	NaN	NaN	NaN	NaN	NaN	NaN	NaN	NaN	NaN	NaN	NaN	NaN	NaN	NaN	NaN	NaN	NaN	NaN	NaN	NaN	NaN	NaN	NaN	NaN	NaN	NaN	NaN	NaN	NaN	NaN	NaN	NaN	NaN
NaN	1.5033	NaN	1.3007	NaN	NaN	1.0491	1.1194	NaN	NaN	NaN	NaN	NaN	NaN	1.4319	NaN	1.3014	NaN	NaN	NaN	NaN	NaN	NaN	NaN	NaN	NaN	NaN	NaN	NaN	NaN	NaN	NaN	NaN	NaN	NaN	NaN	NaN	NaN	NaN	NaN	NaN	NaN	NaN	NaN	NaN	NaN	NaN	NaN	NaN	NaN
NaN	NaN	NaN	NaN	NaN	NaN	NaN	NaN	NaN	NaN	NaN	NaN	NaN	NaN	NaN	NaN	NaN	NaN	NaN	NaN	NaN	NaN	NaN	NaN	NaN	NaN	NaN	NaN	NaN	NaN	NaN	NaN	NaN	NaN	NaN	NaN	NaN	NaN	NaN	NaN	NaN	NaN	NaN	NaN	NaN	NaN	NaN	NaN	NaN	NaN
NaN	NaN	NaN	NaN	NaN	NaN	NaN	NaN	NaN	NaN	NaN	NaN	NaN	NaN	NaN	0.86442	NaN	NaN	NaN	NaN	NaN	0.87215	NaN	NaN	NaN	NaN	NaN	NaN	NaN	1.8077	NaN	NaN	NaN	NaN	1.4638	NaN	NaN	NaN	NaN	NaN	NaN	NaN	NaN	NaN	NaN	NaN	NaN	NaN	NaN	NaN
0.78853	1.1524	1.106	0.7063	1.0305	0.78877	0.92459	1.1203	0.54539	0.80678	0.9563	0.76522	0.76746	0.71574	0.6756	0.48835	0.80113	0.43286	1.892	1.4234	1.8704	1.4567	NaN	1.3515	1.3602	1.8219	1.7766	1.9731	1.6916	1.722	1.733	1.0657	0.95794	0.89733	0.8841	0.77832	1.1879	1.2467	0.9108	1.053	1.0168	0.84632	1.7348	1.0297	1.1992	1.0205	0.88382	0.6887	1.0177	1.4159
NaN	NaN	NaN	NaN	NaN	NaN	NaN	NaN	NaN	NaN	NaN	NaN	NaN	NaN	NaN	NaN	NaN	NaN	NaN	NaN	NaN	NaN	NaN	NaN	2.2555	NaN	NaN	NaN	NaN	NaN	NaN	NaN	NaN	NaN	NaN	NaN	NaN	NaN	NaN	NaN	NaN	NaN	NaN	NaN	NaN	NaN	NaN	NaN	NaN	NaN
0.99556	1.0115	0.54988	1.0308	0.40152	0.88045	NaN	0.96925	0.68951	0.68	0.52596	0.54328	0.57953	0.96512	0.4235	0.40705	0.5531	NaN	1.1748	1.6932	NaN	1.4661	1.7596	2.4798	1.9165	1.9262	1.9364	NaN	1.6297	2.7971	1.8061	2.161	2.7147	2.1399	2.0103	2.6456	NaN	NaN	NaN	NaN	NaN	NaN	NaN	NaN	NaN	NaN	NaN	NaN	NaN	NaN
1.0418	1.0199	0.80381	0.80398	0.88943	0.93543	0.66737	0.93471	0.74999	0.54671	0.627	0.60773	0.53198	0.32358	NaN	NaN	NaN	0.21433	1.4363	1.8776	1.2656	NaN	NaN	1.4564	1.8324	1.5474	1.4756	1.4228	1.3007	1.2477	1.1124	NaN	0.5437	0.43941	NaN	NaN	1.1612	1.2414	0.85083	NaN	1.1206	NaN	0.67928	0.86074	NaN	0.97584	0.74983	NaN	NaN	0.54946
NaN	NaN	NaN	NaN	NaN	NaN	NaN	NaN	NaN	NaN	NaN	NaN	NaN	NaN	NaN	NaN	NaN	NaN	NaN	NaN	NaN	NaN	NaN	NaN	NaN	NaN	NaN	NaN	NaN	NaN	NaN	NaN	NaN	NaN	NaN	NaN	NaN	NaN	NaN	NaN	NaN	NaN	NaN	NaN	NaN	NaN	NaN	NaN	NaN	NaN
0.81132	0.97246	0.82643	0.80346	0.91204	0.85274	0.90045	0.72005	0.8652	0.59029	0.52199	0.2719	NaN	NaN	NaN	NaN	NaN	NaN	NaN	1.7197	1.2958	1.2924	NaN	1.402	1.5538	1.5008	1.6042	1.3203	0.98971	1.0635	0.88402	0.50086	NaN	NaN	NaN	NaN	NaN	0.7793	0.84742	NaN	0.62698	NaN	1.0991	NaN	NaN	1.0255	NaN	NaN	NaN	NaN
0.81132	0.95971	0.86139	0.80346	0.88801	0.85274	0.90045	0.72005	0.8652	0.59029	0.52199	0.2719	NaN	NaN	NaN	NaN	NaN	NaN	NaN	1.7197	1.2958	1.2924	NaN	1.402	1.4609	1.5008	1.6042	1.3169	1.0913	1.0635	0.88402	0.50086	NaN	NaN	NaN	NaN	1.2184	0.7793	0.84742	0.97454	0.62698	1.1959	1.0991	0.94893	0.82255	1.0255	NaN	NaN	NaN	NaN
NaN	NaN	NaN	NaN	NaN	NaN	NaN	NaN	NaN	NaN	NaN	NaN	NaN	NaN	NaN	NaN	NaN	NaN	NaN	NaN	NaN	NaN	NaN	NaN	NaN	NaN	NaN	NaN	NaN	NaN	NaN	NaN	NaN	NaN	NaN	NaN	NaN	NaN	NaN	NaN	NaN	NaN	NaN	NaN	NaN	NaN	NaN	NaN	NaN	NaN
NaN	NaN	NaN	NaN	NaN	NaN	NaN	NaN	NaN	NaN	NaN	NaN	NaN	NaN	NaN	NaN	NaN	NaN	NaN	NaN	NaN	NaN	NaN	NaN	NaN	NaN	NaN	NaN	NaN	NaN	NaN	NaN	NaN	NaN	NaN	NaN	NaN	NaN	NaN	NaN	NaN	NaN	NaN	NaN	NaN	NaN	NaN	NaN	NaN	NaN
NaN	NaN	NaN	NaN	NaN	NaN	NaN	NaN	NaN	NaN	NaN	NaN	NaN	NaN	NaN	NaN	NaN	NaN	NaN	NaN	NaN	NaN	NaN	NaN	NaN	NaN	NaN	NaN	NaN	NaN	NaN	NaN	NaN	NaN	NaN	NaN	NaN	NaN	NaN	NaN	NaN	NaN	NaN	NaN	NaN	NaN	NaN	NaN	NaN	NaN
NaN	NaN	NaN	NaN	0.77275	NaN	NaN	0.89405	1.1337	NaN	NaN	0.71586	NaN	NaN	NaN	NaN	NaN	NaN	NaN	3.6626	NaN	NaN	NaN	NaN	NaN	1.9273	NaN	1.8949	NaN	NaN	NaN	1.6763	NaN	NaN	NaN	NaN	NaN	NaN	NaN	NaN	NaN	NaN	NaN	NaN	NaN	NaN	NaN	NaN	NaN	NaN
NaN	NaN	NaN	NaN	NaN	NaN	NaN	NaN	NaN	NaN	NaN	NaN	NaN	NaN	NaN	NaN	NaN	NaN	NaN	1.5457	NaN	1.0205	NaN	NaN	NaN	NaN	NaN	NaN	NaN	0.93773	NaN	NaN	NaN	NaN	NaN	NaN	NaN	NaN	NaN	0.95692	NaN	NaN	1.0886	NaN	NaN	NaN	NaN	NaN	NaN	NaN
NaN	NaN	NaN	NaN	NaN	NaN	NaN	NaN	0.53381	NaN	NaN	NaN	NaN	NaN	0.89999	NaN	NaN	NaN	NaN	NaN	NaN	NaN	NaN	NaN	1.4615	NaN	NaN	NaN	NaN	NaN	NaN	NaN	NaN	1.5445	NaN	NaN	NaN	NaN	NaN	0.95692	NaN	NaN	1.0886	NaN	NaN	NaN	NaN	NaN	1.2247	NaN
1.0916	1.1424	NaN	0.81876	0.80992	0.9033	0.86368	1.005	0.86787	0.63975	0.57217	0.4337	0.91265	0.93115	NaN	0.1164	0.87643	NaN	NaN	NaN	1.2326	1.5005	NaN	1.6386	NaN	1.7593	1.1087	1.6363	1.8897	1.9865	1.8221	0.64764	1.7221	NaN	NaN	NaN	0.82351	1.1453	NaN	NaN	0.98484	1.031	1.1416	NaN	NaN	NaN	1.3439	1.2536	NaN	1.1854
NaN	1.805	NaN	NaN	NaN	NaN	NaN	NaN	NaN	NaN	NaN	NaN	1.3729	NaN	NaN	NaN	NaN	NaN	NaN	NaN	NaN	NaN	NaN	NaN	NaN	NaN	NaN	NaN	NaN	NaN	NaN	NaN	NaN	NaN	NaN	NaN	NaN	NaN	NaN	NaN	NaN	NaN	NaN	NaN	NaN	NaN	NaN	NaN	NaN	NaN
1.3929	1.805	1.2477	1.1895	1.1345	1.3503	1.282	NaN	NaN	1.1154	1.3054	NaN	1.3729	0.95934	NaN	NaN	1.127	NaN	1.8563	2.628	2.0171	1.9387	2.4891	NaN	1.9064	2.0328	2.1416	2.1003	2.2424	2.5251	2.1198	2.1521	1.9846	1.7047	1.7108	1.2903	1.3317	NaN	1.3457	2.0561	1.4735	NaN	NaN	NaN	NaN	1.4805	NaN	1.8135	NaN	NaN
NaN	NaN	NaN	NaN	NaN	NaN	NaN	NaN	NaN	NaN	NaN	NaN	NaN	NaN	NaN	NaN	NaN	NaN	NaN	NaN	NaN	NaN	NaN	NaN	NaN	NaN	NaN	NaN	NaN	NaN	NaN	NaN	NaN	NaN	NaN	NaN	NaN	NaN	NaN	NaN	NaN	NaN	NaN	NaN	NaN	NaN	NaN	NaN	NaN	NaN
NaN	NaN	NaN	NaN	NaN	NaN	NaN	NaN	NaN	NaN	NaN	NaN	NaN	NaN	NaN	NaN	NaN	NaN	NaN	NaN	NaN	NaN	NaN	NaN	NaN	NaN	NaN	NaN	NaN	NaN	NaN	NaN	NaN	NaN	NaN	NaN	NaN	NaN	NaN	NaN	NaN	NaN	NaN	NaN	NaN	NaN	NaN	NaN	NaN	NaN
1.334	NaN	1.0178	1.2016	1.614	1.4314	1.2699	NaN	NaN	NaN	NaN	NaN	NaN	NaN	NaN	NaN	NaN	NaN	NaN	2.0785	NaN	NaN	NaN	2.4391	NaN	NaN	2.3822	NaN	NaN	NaN	1.9903	NaN	1.8008	NaN	NaN	NaN	NaN	NaN	NaN	NaN	NaN	NaN	NaN	NaN	NaN	NaN	NaN	NaN	NaN	NaN
1.334	NaN	1.1212	1.2016	1.0244	1.3891	1.2699	1.8719	1.1604	1.1726	0.82595	NaN	NaN	NaN	1.4122	1.1069	1.895	NaN	1.4211	3.883	1.0684	1.3499	NaN	2.4391	2.2971	1.8695	3.5821	NaN	3.8888	3.0123	1.9903	NaN	1.8008	3.2505	NaN	NaN	NaN	NaN	NaN	NaN	1.828	NaN	1.1743	NaN	1.6429	NaN	1.2735	NaN	2.5494	NaN
1.4062	1.6756	1.1369	1.2016	1.7104	1.3414	1.3938	1.7494	1.1604	1.4263	1.7025	2.161	1.4643	1.7758	1.3971	1.376	2.4894	1.079	1.4211	3.0603	1.2043	1.3499	NaN	3.3312	2.7336	3.0684	2.653	3.2849	2.3531	3.0123	4.577	NaN	NaN	NaN	2.0725	3.0535	1.2091	NaN	NaN	1.156	1.828	1.8667	1.1743	1.6616	1.6429	2.0585	1.2735	2.2196	2.5494	3.0185
NaN	0.7438	0.61887	0.78275	0.5065	NaN	0.47878	0.63149	0.86113	0.61079	0.75909	NaN	0.87661	0.67516	0.71124	0.53588	0.98014	0.46073	NaN	2.7951	NaN	NaN	1.9538	2.2576	NaN	NaN	1.6002	1.0794	0.9393	0.90044	1.363	NaN	1.5493	NaN	NaN	1.0706	NaN	1.3246	NaN	1.4659	NaN	0.92646	NaN	NaN	NaN	1.4877	0.78667	0.97816	NaN	NaN
NaN	NaN	NaN	NaN	NaN	NaN	NaN	NaN	NaN	NaN	NaN	NaN	NaN	NaN	NaN	NaN	NaN	NaN	NaN	NaN	NaN	NaN	NaN	NaN	NaN	NaN	NaN	NaN	NaN	NaN	NaN	NaN	NaN	NaN	NaN	NaN	NaN	NaN	NaN	NaN	NaN	NaN	NaN	NaN	NaN	NaN	NaN	1.5826	1.6209	1.412
NaN	NaN	NaN	NaN	NaN	NaN	NaN	NaN	NaN	NaN	NaN	NaN	NaN	NaN	NaN	NaN	NaN	NaN	NaN	NaN	NaN	NaN	NaN	NaN	NaN	NaN	NaN	NaN	NaN	NaN	NaN	NaN	NaN	NaN	NaN	NaN	NaN	NaN	NaN	NaN	NaN	NaN	NaN	NaN	NaN	NaN	NaN	1.5826	1.6209	1.412
1.177	1.0215	0.85598	0.64343	0.826	0.80802	0.70685	0.78348	0.58057	0.37054	0.50498	0.19751	NaN	0.05358	NaN	NaN	NaN	NaN	1.2023	1.3451	1.4421	1.1569	1.3525	1.3598	1.4474	1.3126	1.2037	1.3751	1.3736	NaN	NaN	NaN	NaN	0.10302	NaN	NaN	0.80102	1.1689	0.96679	0.85356	0.82186	0.91828	0.83701	0.64303	0.54491	0.39746	0.47375	0.20583	0.15571	0.14549
1.043	1.0306	0.92034	0.57419	0.76325	0.8056	0.71718	0.91916	0.59205	0.70647	0.63157	0.70105	0.88209	0.87589	1.0987	0.91082	1.634	1.3378	1.4415	1.2075	1.3149	1.0542	0.91568	1.2636	1.3194	1.4345	1.5603	1.4204	1.5185	2.0193	1.6395	1.7149	1.4583	2.0591	1.7555	2.1578	1.0277	1.2198	0.94007	0.97343	1.0078	0.97455	1.3038	0.93275	1.174	1.0633	0.89656	1.7165	1.4374	1.2262
1.0287	1.2516	0.7318	0.95337	NaN	NaN	NaN	0.96371	0.93169	NaN	1.0357	0.97492	1.0437	1.1845	0.93581	NaN	1.191	NaN	NaN	NaN	NaN	NaN	NaN	2.1412	1.7975	1.903	NaN	1.963	NaN	2.074	NaN	NaN	NaN	2.4602	NaN	1.8568	1.0299	1.4743	1.2136	NaN	NaN	NaN	NaN	0.97956	1.1426	1.1606	NaN	1.472	1.5357	NaN
0.94372	1.041	0.92601	0.93536	0.8526	1.0027	0.90407	1.0527	0.87357	0.93404	1.0123	0.92244	0.61646	1.09	0.8931	0.93265	1.2483	0.67585	1.3224	1.9598	1.2767	0.80263	2.0067	2.0503	1.4334	1.2333	1.949	2.1858	1.4419	2.076	1.1609	2.41	2.0319	1.1918	1.3782	1.8794	0.89746	1.6655	0.74499	1.0534	1.1512	1.2543	0.89873	1.0061	1.1441	1.076	1.3515	1.5065	1.4474	1.6417
NaN	NaN	NaN	NaN	NaN	NaN	NaN	NaN	NaN	NaN	NaN	NaN	NaN	NaN	NaN	NaN	NaN	NaN	0.98505	1.1522	NaN	NaN	0.9061	NaN	NaN	NaN	NaN	NaN	NaN	NaN	NaN	NaN	NaN	NaN	NaN	NaN	NaN	NaN	NaN	NaN	NaN	NaN	NaN	NaN	NaN	NaN	NaN	NaN	NaN	NaN
1.3031	0.73603	NaN	NaN	0.71686	NaN	NaN	NaN	NaN	NaN	NaN	NaN	NaN	NaN	NaN	NaN	NaN	NaN	NaN	NaN	NaN	NaN	NaN	NaN	NaN	NaN	NaN	NaN	NaN	NaN	NaN	NaN	NaN	NaN	NaN	NaN	NaN	NaN	NaN	NaN	NaN	NaN	NaN	NaN	NaN	NaN	NaN	NaN	NaN	NaN
NaN	NaN	NaN	NaN	NaN	NaN	NaN	NaN	NaN	NaN	NaN	1.0356	NaN	NaN	NaN	NaN	NaN	NaN	NaN	1.8522	NaN	NaN	NaN	1.7189	NaN	NaN	NaN	NaN	NaN	NaN	1.7104	NaN	NaN	1.0133	0.64387	1.3296	NaN	NaN	NaN	NaN	NaN	NaN	NaN	NaN	1.6702	NaN	NaN	NaN	1.2667	NaN
1.1751	1.5911	0.72173	1.1126	1.0572	NaN	1.1211	1.0399	0.89016	0.99868	1.2534	0.71018	1.2318	1.1103	0.81478	1.0305	1.1311	NaN	NaN	0.94616	NaN	NaN	NaN	0.97571	2.4945	1.3176	1.1152	0.91089	1.4699	NaN	NaN	1.152	0.91616	0.70653	NaN	0.88384	0.80377	1.1723	0.41443	0.59585	0.67841	0.76908	0.67962	1.3406	0.71787	NaN	1.5162	1.6385	0.72287	0.87229
NaN	1.0399	0.66742	0.79074	0.86994	1.0331	NaN	0.89996	0.86676	NaN	NaN	0.70008	NaN	NaN	NaN	NaN	NaN	NaN	1.5	1.6755	1.1864	NaN	NaN	NaN	1.9553	1.5635	1.2798	NaN	NaN	1.2967	NaN	0.85362	NaN	NaN	NaN	NaN	NaN	NaN	NaN	1.0913	0.90797	1.1908	1.0211	NaN	NaN	1.036	NaN	NaN	NaN	NaN
NaN	NaN	NaN	NaN	NaN	NaN	NaN	NaN	NaN	NaN	NaN	NaN	NaN	NaN	NaN	NaN	NaN	NaN	NaN	NaN	NaN	NaN	NaN	NaN	NaN	NaN	NaN	NaN	NaN	NaN	NaN	NaN	NaN	NaN	NaN	NaN	NaN	NaN	NaN	NaN	NaN	NaN	NaN	NaN	NaN	NaN	NaN	NaN	NaN	NaN
0.9811	0.85756	0.47009	1.0395	NaN	NaN	NaN	NaN	NaN	NaN	NaN	NaN	NaN	NaN	NaN	NaN	NaN	NaN	1.1722	2.9974	0.54945	0.89934	1.0989	1.8293	1.2647	1.346	1.2542	1.0802	0.84484	NaN	NaN	NaN	NaN	NaN	NaN	NaN	1.0089	1.1181	0.80317	0.81073	0.63217	0.97563	0.55242	0.73847	NaN	NaN	NaN	NaN	NaN	NaN
NaN	1.0772	0.70744	0.67073	0.6407	0.87559	NaN	0.77038	1.2526	0.68359	0.58987	0.46034	0.50234	0.46735	0.37992	NaN	0.27741	NaN	NaN	2.7518	0.71974	0.71108	1.6691	NaN	1.3903	1.4881	1.4331	NaN	1.3899	1.1011	1.4566	1.138	1.3615	0.71101	NaN	NaN	1.0291	NaN	0.71795	0.85138	0.83625	1.3252	0.7768	1.166	0.80478	0.8591	1.1803	1.1213	0.72289	NaN
0.99749	1.051	1.408	0.78102	0.68997	0.87559	NaN	0.77155	0.76699	0.68359	0.58987	0.95231	0.50234	1.3251	1.1572	0.80061	1.4607	0.66933	1.2611	2.7518	0.71974	0.71108	2.3256	NaN	1.4959	1.7035	1.4472	1.6438	1.3899	1.1011	2.6995	1.138	2.7441	4.2066	2.4082	2.2091	1.0741	NaN	1.0649	0.89417	1.3863	1.3051	0.84226	0.93399	1.1792	0.8591	1.5559	1.9933	2.0775	2.3819
NaN	0.88566	NaN	0.64853	NaN	NaN	NaN	NaN	NaN	NaN	NaN	NaN	NaN	NaN	NaN	NaN	NaN	NaN	NaN	NaN	NaN	1.2606	NaN	NaN	NaN	0.66409	0.45783	NaN	1.6939	NaN	NaN	NaN	NaN	NaN	NaN	NaN	NaN	NaN	NaN	NaN	NaN	NaN	0.95098	NaN	NaN	NaN	NaN	NaN	NaN	NaN
0.95549	1.0983	0.89028	1.0197	0.80799	0.72812	0.67838	0.72416	0.84608	0.74135	0.61975	0.40133	0.26883	0.16268	0.14398	0.098309	0.11602	NaN	1.1711	NaN	1.2688	1.7185	1.1057	2.3891	1.2533	1.5393	1.6101	0.9909	1.4463	1.1606	0.55959	0.60748	0.19532	0.22834	0.13912	0.11728	0.9616	0.71579	0.9542	0.82696	0.69736	0.51564	0.81255	0.61293	0.88825	0.42232	0.61571	0.78455	0.27881	0.28974
NaN	NaN	NaN	NaN	NaN	NaN	NaN	NaN	NaN	NaN	NaN	NaN	NaN	NaN	NaN	NaN	NaN	NaN	NaN	NaN	NaN	NaN	NaN	NaN	NaN	NaN	NaN	NaN	NaN	NaN	NaN	NaN	NaN	3.8623	NaN	2.6371	1.2013	NaN	0.97399	NaN	2.0848	1.7196	1.0965	2.5585	NaN	1.5398	NaN	2.0491	2.6209	2.3804
NaN	NaN	NaN	NaN	NaN	NaN	NaN	NaN	NaN	NaN	NaN	NaN	NaN	NaN	NaN	NaN	NaN	NaN	0.95949	1.3083	2.018	1.0063	NaN	NaN	1.558	1.1822	1.2487	1.1975	1.7798	1.064	NaN	NaN	1.2753	1.7714	1.6816	1.1641	NaN	NaN	NaN	NaN	NaN	NaN	NaN	NaN	NaN	NaN	NaN	NaN	NaN	NaN
0.95198	NaN	NaN	NaN	0.63609	NaN	NaN	0.61225	0.36912	NaN	0.25395	0.11039	NaN	0.067508	NaN	NaN	NaN	NaN	1.2175	NaN	1.4614	NaN	1.5622	NaN	NaN	1.5865	NaN	NaN	0.9939	0.34893	0.12119	NaN	NaN	0.0862	NaN	NaN	NaN	NaN	1.0495	0.73065	NaN	NaN	NaN	NaN	NaN	NaN	NaN	0.12276	NaN	NaN
NaN	NaN	NaN	NaN	NaN	NaN	NaN	NaN	NaN	NaN	NaN	NaN	NaN	NaN	NaN	NaN	NaN	NaN	NaN	NaN	NaN	NaN	NaN	NaN	NaN	NaN	NaN	NaN	NaN	NaN	NaN	NaN	NaN	NaN	NaN	NaN	NaN	NaN	NaN	NaN	0.92503	NaN	0.69394	NaN	0.32133	0.22188	0.26841	NaN	NaN	0.088602
NaN	NaN	NaN	NaN	NaN	NaN	NaN	NaN	NaN	NaN	NaN	NaN	NaN	NaN	NaN	NaN	NaN	NaN	NaN	NaN	NaN	NaN	NaN	NaN	NaN	NaN	NaN	NaN	NaN	NaN	NaN	NaN	NaN	NaN	NaN	NaN	NaN	NaN	NaN	NaN	NaN	NaN	NaN	NaN	NaN	NaN	NaN	NaN	NaN	NaN
0.86074	0.72314	NaN	0.63638	0.7359	0.62385	0.63061	0.60704	0.32738	0.19917	0.26778	NaN	NaN	NaN	NaN	NaN	NaN	NaN	1.5568	1.5246	1.8806	1.6111	1.8846	1.1692	1.6707	1.2103	1.0864	1.2172	1.1151	0.34887	NaN	NaN	NaN	NaN	NaN	NaN	1.09	0.76069	0.9202	0.92962	NaN	0.71105	0.93798	0.77286	NaN	NaN	0.16477	NaN	NaN	NaN
NaN	NaN	NaN	NaN	NaN	NaN	NaN	NaN	NaN	NaN	NaN	NaN	NaN	NaN	NaN	NaN	NaN	NaN	NaN	NaN	1.3322	NaN	NaN	0.77024	NaN	NaN	NaN	NaN	NaN	NaN	NaN	NaN	NaN	NaN	NaN	NaN	NaN	NaN	1.0273	0.83892	0.86565	0.71391	0.72779	NaN	NaN	NaN	0.30926	NaN	NaN	NaN
1.1603	1.0973	1.0095	0.88661	0.90502	1.1346	0.74281	1.1112	0.78447	0.65516	0.93534	0.63324	0.72308	0.56861	0.69114	NaN	0.70852	NaN	1.1247	1.7185	0.92484	0.87507	2.1023	1.5139	1.5896	1.2091	1.5938	1.7353	1.3265	1.5517	1.5764	0.95962	1.082	0.7807	0.54845	0.61522	1.0515	1.1564	0.82452	0.93727	1.1558	1.0731	0.87643	0.76184	0.83402	0.8636	1.2588	1.0219	1.105	0.87705
NaN	NaN	NaN	NaN	0.85583	NaN	NaN	0.89837	NaN	1.275	NaN	NaN	NaN	NaN	NaN	NaN	1.6563	NaN	NaN	1.4899	NaN	1.7668	NaN	NaN	2.1273	1.3401	NaN	2.3728	1.5307	NaN	1.8115	NaN	NaN	1.7912	1.6543	NaN	NaN	NaN	NaN	NaN	NaN	NaN	NaN	NaN	NaN	NaN	NaN	NaN	NaN	NaN
NaN	0.83266	0.78475	0.59165	0.80337	0.82586	0.73429	0.85185	0.59728	0.61684	0.75675	0.78701	0.67406	0.67534	0.6787	0.41351	0.68499	0.25508	NaN	1.2145	1.1242	1.0625	1.3386	1.2456	1.1493	1.3619	1.2497	1.5639	1.3647	1.6046	1.4329	1.3826	1.1513	1.3179	1.1408	0.87557	NaN	0.97227	0.72988	0.70628	0.79632	0.89279	0.82133	0.68886	0.63748	0.79143	0.95698	0.97551	0.91183	0.99561
0.95913	NaN	0.38719	NaN	NaN	NaN	NaN	NaN	NaN	NaN	NaN	NaN	NaN	NaN	0.44558	0.23446	0.28299	NaN	NaN	NaN	NaN	NaN	NaN	NaN	NaN	NaN	NaN	NaN	0.36084	NaN	0.7552	NaN	0.46081	0.47113	NaN	0.39742	NaN	NaN	NaN	NaN	NaN	NaN	NaN	NaN	NaN	NaN	NaN	NaN	NaN	NaN
NaN	NaN	NaN	NaN	NaN	0.65842	NaN	NaN	NaN	NaN	NaN	NaN	NaN	NaN	NaN	NaN	NaN	NaN	1.1787	NaN	NaN	NaN	NaN	NaN	1.9844	NaN	2.0177	NaN	1.7847	1.7857	NaN	NaN	NaN	0.40761	NaN	NaN	NaN	NaN	NaN	NaN	NaN	NaN	1.1853	NaN	NaN	NaN	0.63798	NaN	NaN	NaN
NaN	NaN	NaN	NaN	NaN	NaN	NaN	NaN	NaN	NaN	NaN	NaN	NaN	NaN	NaN	NaN	NaN	NaN	NaN	1.6587	NaN	0.90774	NaN	1.0106	1.326	NaN	1.7756	NaN	1.1326	1.9575	NaN	NaN	1.8061	NaN	NaN	NaN	1.1005	NaN	NaN	NaN	NaN	NaN	0.84614	NaN	NaN	0.52465	NaN	NaN	NaN	NaN
NaN	NaN	NaN	NaN	NaN	NaN	NaN	NaN	NaN	NaN	NaN	NaN	NaN	NaN	NaN	NaN	NaN	NaN	NaN	NaN	NaN	NaN	NaN	NaN	NaN	NaN	NaN	1.9565	NaN	NaN	NaN	NaN	NaN	NaN	NaN	NaN	NaN	NaN	NaN	NaN	NaN	NaN	NaN	NaN	NaN	NaN	NaN	NaN	NaN	NaN
NaN	NaN	1.0006	NaN	NaN	NaN	NaN	0.86549	0.62265	0.62343	NaN	NaN	0.83458	0.74074	NaN	0.65462	NaN	NaN	NaN	NaN	NaN	NaN	NaN	NaN	NaN	NaN	NaN	NaN	NaN	NaN	NaN	NaN	NaN	NaN	NaN	NaN	NaN	NaN	NaN	NaN	NaN	NaN	NaN	NaN	NaN	NaN	NaN	NaN	NaN	NaN
1.4006	1.2528	0.85667	0.96628	1.0335	NaN	0.9607	1.2809	0.88434	0.69272	1.1064	0.85217	NaN	1.3744	1.2611	NaN	NaN	NaN	NaN	NaN	NaN	NaN	NaN	NaN	NaN	NaN	NaN	NaN	NaN	NaN	NaN	NaN	NaN	NaN	NaN	NaN	NaN	NaN	NaN	NaN	NaN	NaN	NaN	NaN	NaN	NaN	NaN	NaN	NaN	NaN
0.9987	NaN	NaN	NaN	NaN	NaN	0.8403	1.1035	NaN	NaN	NaN	NaN	NaN	NaN	NaN	NaN	NaN	NaN	NaN	NaN	NaN	1.4662	1.6569	NaN	1.3537	NaN	NaN	NaN	NaN	NaN	NaN	NaN	NaN	NaN	NaN	NaN	NaN	NaN	NaN	1.0046	NaN	NaN	NaN	NaN	NaN	NaN	NaN	NaN	1.0718	NaN
NaN	1.0408	0.93465	NaN	NaN	NaN	NaN	0.8824	NaN	0.65828	NaN	0.97696	0.81542	NaN	NaN	NaN	NaN	NaN	1.219	1.4322	1.3007	NaN	NaN	1.6363	NaN	NaN	NaN	NaN	1.5727	NaN	NaN	NaN	1.2514	1.1523	NaN	NaN	NaN	NaN	1.0924	NaN	NaN	0.98686	1.1225	NaN	NaN	NaN	1.2773	NaN	NaN	NaN
NaN	NaN	NaN	0.77713	NaN	NaN	NaN	NaN	NaN	NaN	NaN	NaN	NaN	NaN	NaN	NaN	NaN	NaN	NaN	NaN	NaN	NaN	NaN	NaN	NaN	NaN	NaN	NaN	NaN	NaN	NaN	NaN	NaN	NaN	NaN	NaN	NaN	NaN	NaN	NaN	NaN	NaN	NaN	NaN	NaN	NaN	NaN	NaN	NaN	NaN
NaN	NaN	NaN	NaN	NaN	NaN	NaN	NaN	NaN	NaN	NaN	NaN	NaN	NaN	NaN	NaN	NaN	NaN	NaN	NaN	NaN	NaN	NaN	NaN	NaN	NaN	NaN	NaN	NaN	NaN	NaN	NaN	NaN	NaN	NaN	NaN	NaN	NaN	NaN	NaN	NaN	NaN	NaN	NaN	NaN	NaN	NaN	NaN	NaN	NaN
NaN	NaN	NaN	NaN	NaN	NaN	NaN	NaN	NaN	NaN	NaN	NaN	NaN	NaN	NaN	NaN	NaN	NaN	NaN	1.9648	NaN	NaN	NaN	NaN	3.4878	1.9993	NaN	1.3925	NaN	NaN	NaN	NaN	NaN	NaN	NaN	NaN	1.0981	NaN	NaN	NaN	NaN	NaN	NaN	NaN	NaN	NaN	NaN	NaN	NaN	NaN
0.77988	1.4644	0.55896	1.2247	1.0532	1.1344	NaN	1.1118	0.99753	0.9079	0.76174	NaN	0.15051	NaN	NaN	NaN	NaN	NaN	1.0853	2.2896	1.0209	0.87321	NaN	3.2024	1.8214	2.3311	2.1261	2.0344	1.4786	0.81074	0.31319	NaN	NaN	NaN	NaN	NaN	NaN	NaN	0.70324	0.90072	NaN	1.812	0.94313	0.79632	0.87387	0.53773	0.69091	NaN	NaN	NaN
0.90494	NaN	0.89514	1.0912	1.1117	NaN	0.95115	1.2297	1.0371	1.1067	0.96812	NaN	1.2377	1.1368	1.1688	0.8102	NaN	NaN	1.4634	1.698	NaN	1.0574	NaN	2.0235	2.5192	NaN	NaN	1.9484	NaN	NaN	NaN	NaN	NaN	NaN	NaN	NaN	NaN	NaN	1.0753	1.0093	1.3804	1.5838	1.0783	1.5976	NaN	NaN	NaN	NaN	NaN	NaN
0.95591	1.38	0.82213	0.57519	1.2903	1.1372	0.87447	1.7593	NaN	0.77941	1.0829	1.5063	1.3175	1.0132	0.73988	0.99805	1.3613	0.76681	NaN	NaN	NaN	1.0006	NaN	1.4953	1.6167	NaN	NaN	NaN	NaN	1.9377	2.3815	NaN	1.1484	2.2171	1.3221	1.7795	1.0277	0.77512	0.7012	NaN	1.3084	0.86443	0.90087	0.44884	0.78847	0.81497	1.6164	1.1769	1.1824	1.4078
NaN	NaN	NaN	NaN	NaN	NaN	NaN	NaN	NaN	NaN	NaN	NaN	NaN	NaN	NaN	NaN	NaN	NaN	NaN	NaN	NaN	NaN	NaN	NaN	NaN	NaN	NaN	NaN	NaN	NaN	NaN	NaN	NaN	NaN	NaN	NaN	NaN	0.77512	NaN	NaN	NaN	NaN	NaN	NaN	NaN	NaN	NaN	NaN	NaN	NaN
NaN	1.4981	NaN	NaN	NaN	NaN	NaN	NaN	NaN	NaN	NaN	NaN	NaN	NaN	NaN	NaN	NaN	0.74409	NaN	NaN	NaN	NaN	NaN	NaN	NaN	NaN	NaN	NaN	NaN	NaN	NaN	NaN	NaN	NaN	NaN	NaN	NaN	NaN	NaN	NaN	NaN	1.5246	NaN	NaN	NaN	NaN	NaN	NaN	1.473	1.9567
NaN	NaN	NaN	NaN	NaN	NaN	NaN	NaN	NaN	NaN	NaN	NaN	NaN	NaN	NaN	NaN	NaN	NaN	NaN	NaN	NaN	NaN	NaN	NaN	NaN	NaN	NaN	NaN	NaN	NaN	NaN	NaN	NaN	NaN	NaN	NaN	NaN	NaN	NaN	NaN	NaN	NaN	NaN	NaN	NaN	NaN	NaN	NaN	NaN	NaN
NaN	NaN	NaN	NaN	NaN	NaN	NaN	NaN	NaN	NaN	NaN	NaN	NaN	NaN	NaN	NaN	NaN	NaN	NaN	NaN	NaN	NaN	NaN	NaN	NaN	NaN	NaN	NaN	NaN	NaN	NaN	NaN	NaN	NaN	NaN	NaN	NaN	NaN	NaN	NaN	NaN	NaN	NaN	NaN	NaN	NaN	NaN	NaN	NaN	NaN
0.81547	NaN	NaN	NaN	NaN	NaN	NaN	NaN	NaN	NaN	NaN	NaN	NaN	NaN	NaN	NaN	NaN	NaN	NaN	NaN	NaN	NaN	NaN	NaN	NaN	NaN	NaN	NaN	NaN	NaN	NaN	NaN	NaN	NaN	NaN	NaN	NaN	NaN	NaN	NaN	NaN	NaN	NaN	NaN	NaN	NaN	NaN	NaN	NaN	NaN
0.98993	1.5652	0.74195	NaN	0.869	1.2429	0.90003	1.1436	1.0698	1.1649	1.0204	1.1416	1.1457	1.0951	1.034	0.82176	NaN	NaN	NaN	NaN	NaN	NaN	NaN	2.4891	NaN	NaN	2.0328	2.2424	NaN	NaN	2.0396	2.2811	NaN	NaN	NaN	NaN	NaN	NaN	1.0368	0.90195	1.363	1.4937	NaN	1.2935	NaN	1.1164	NaN	1.8182	1.8496	1.6869
0.8821	1.0946	0.77005	0.83254	0.95797	0.91701	0.70737	0.81806	0.67687	0.54363	0.60483	0.42666	0.28249	NaN	0.15972	NaN	NaN	NaN	1.2236	2.0093	1.055	0.82329	1.4804	1.5317	1.5012	1.6917	1.5601	1.3002	1.0832	1.026	0.72866	0.57257	0.28503	0.19827	NaN	0.12062	0.98365	1.1595	0.80718	0.88877	1.0194	1.0599	0.76443	0.82805	0.88412	0.69272	NaN	0.39135	0.34083	NaN
1.0508	0.99972	0.7255	0.70923	0.59996	0.61704	0.63148	0.5653	0.48141	NaN	NaN	0.26049	NaN	NaN	0.18457	NaN	NaN	NaN	1.3229	1.4794	0.94617	1.2619	NaN	1.2467	1.2295	1.3274	1.1244	NaN	0.95163	1.0615	0.47875	0.37371	0.28871	0.25361	0.22323	NaN	1.0505	1.0022	1.2448	0.86635	0.62917	NaN	0.90224	0.8012	0.61855	0.621	0.73445	0.41032	NaN	NaN
1.262	1.3211	0.92279	0.95647	NaN	NaN	NaN	NaN	NaN	NaN	1.0734	0.8824	NaN	NaN	0.47048	0.36344	0.49861	NaN	1.1441	NaN	NaN	NaN	2.4732	NaN	1.6904	2.2174	1.2638	NaN	NaN	NaN	1.863	1.4287	NaN	NaN	0.56705	NaN	NaN	NaN	NaN	NaN	NaN	NaN	NaN	NaN	NaN	NaN	NaN	NaN	NaN	NaN
NaN	NaN	NaN	NaN	NaN	NaN	NaN	NaN	NaN	NaN	NaN	NaN	NaN	NaN	NaN	NaN	NaN	NaN	NaN	NaN	NaN	NaN	NaN	1.4514	NaN	NaN	NaN	NaN	NaN	NaN	NaN	NaN	NaN	NaN	NaN	NaN	NaN	NaN	NaN	NaN	NaN	NaN	NaN	NaN	NaN	NaN	NaN	NaN	NaN	NaN
NaN	NaN	NaN	NaN	NaN	NaN	NaN	NaN	NaN	NaN	NaN	NaN	NaN	NaN	NaN	NaN	NaN	NaN	NaN	NaN	NaN	NaN	NaN	NaN	NaN	NaN	NaN	NaN	NaN	NaN	NaN	NaN	NaN	NaN	NaN	NaN	NaN	NaN	NaN	NaN	NaN	NaN	NaN	NaN	NaN	NaN	NaN	NaN	NaN	NaN
NaN	NaN	NaN	0.7498	NaN	NaN	0.88861	1.27	NaN	0.95889	NaN	NaN	NaN	0.95609	1.0374	NaN	NaN	NaN	NaN	NaN	NaN	NaN	NaN	NaN	NaN	NaN	NaN	1.7303	NaN	NaN	NaN	1.6426	NaN	NaN	NaN	NaN	NaN	NaN	NaN	NaN	NaN	NaN	NaN	NaN	NaN	NaN	NaN	NaN	NaN	NaN
NaN	NaN	NaN	0.7498	NaN	NaN	0.88861	1.27	NaN	0.95889	NaN	NaN	NaN	0.95609	1.0374	NaN	NaN	NaN	NaN	NaN	NaN	NaN	NaN	NaN	NaN	NaN	NaN	1.7303	NaN	NaN	NaN	1.6426	NaN	NaN	NaN	NaN	NaN	NaN	NaN	NaN	NaN	NaN	NaN	NaN	NaN	NaN	NaN	NaN	NaN	NaN
NaN	NaN	NaN	0.7498	NaN	NaN	0.88861	1.27	NaN	0.95889	NaN	NaN	NaN	0.95609	1.0374	NaN	NaN	NaN	NaN	NaN	NaN	NaN	NaN	NaN	NaN	NaN	NaN	1.7303	NaN	NaN	NaN	1.6426	NaN	NaN	NaN	NaN	NaN	NaN	NaN	NaN	NaN	NaN	NaN	NaN	NaN	NaN	NaN	NaN	NaN	NaN
0.95131	1.1996	1.0073	0.85384	1.0349	0.87326	NaN	1.1665	NaN	0.78591	0.78945	0.86214	0.75032	NaN	0.54111	NaN	NaN	NaN	NaN	NaN	1.0754	1.1006	NaN	NaN	NaN	1.6962	NaN	1.7671	NaN	1.5818	1.5651	NaN	NaN	1.247	NaN	NaN	NaN	NaN	1.2068	NaN	0.93002	0.98921	1.1034	1.5159	NaN	1.3619	0.97312	0.88531	1.0225	NaN
NaN	NaN	NaN	NaN	NaN	NaN	NaN	NaN	NaN	NaN	NaN	NaN	NaN	NaN	NaN	NaN	NaN	NaN	NaN	1.3535	NaN	NaN	1.3489	NaN	NaN	NaN	NaN	NaN	NaN	1.0868	NaN	NaN	NaN	NaN	NaN	1.762	NaN	NaN	NaN	NaN	NaN	NaN	NaN	NaN	NaN	NaN	NaN	NaN	NaN	NaN
0.83174	1.3605	0.88232	0.79964	0.83123	1.0269	0.7877	1.0947	0.61041	0.88742	0.69015	0.73036	0.67296	0.68516	0.50335	NaN	0.61331	NaN	NaN	1.9777	1.1718	1.5848	NaN	1.3189	1.7662	1.3286	1.8505	NaN	1.7067	1.2792	1.4289	NaN	NaN	NaN	0.58175	NaN	1.1543	NaN	1.1283	1.1702	1.2409	0.99911	NaN	NaN	NaN	0.93923	NaN	NaN	0.96213	NaN
0.96947	1.1129	0.89718	0.69314	0.85967	0.90577	0.82998	1.0575	0.62641	0.63709	0.8142	0.66082	0.66324	0.63154	0.54453	0.42001	0.61331	NaN	1.2923	1.2883	1.2234	1.2562	NaN	1.3189	1.7662	1.3286	1.1521	NaN	1.7067	1.2792	1.4289	NaN	1.2976	1.4087	0.58175	NaN	0.99654	NaN	1.0287	1.1702	0.9269	0.87719	0.85689	0.86345	NaN	0.91027	1.0765	NaN	0.96213	0.92565
0.82736	1.2703	0.94816	1.0555	1.0635	0.96086	0.92705	1.1655	NaN	0.99542	0.97512	0.98313	1.1279	1.0407	0.96874	0.66727	1.3675	0.96473	1.2312	2.1654	1.24	NaN	NaN	1.6138	1.9617	1.7988	1.8969	1.9816	1.7856	1.6578	2.0243	1.8479	2.0776	2.0713	1.7236	1.5856	1.1165	1.5784	1.2707	1.2852	1.2934	1.4017	1.2655	1.3408	1.3601	1.3038	1.5377	1.6893	1.7169	1.7295
1.0351	1.1346	0.59256	0.71694	0.6592	0.72375	0.59963	0.67921	0.56067	0.48808	0.63945	0.5428	0.42173	0.25485	0.15449	0.048232	0.059876	0.012593	1.1165	1.7298	0.88399	0.77896	1.594	1.6384	1.3101	0.46168	1.3074	1.4529	1.086	1.2193	1.0911	0.97224	0.69825	0.46666	0.20209	0.14635	1.0513	1.2174	0.69693	0.78955	0.86279	0.92092	0.66921	0.64656	0.60916	0.77039	0.846	0.7743	0.64158	0.48713
NaN	NaN	NaN	NaN	NaN	NaN	NaN	NaN	NaN	NaN	NaN	NaN	NaN	NaN	NaN	NaN	NaN	NaN	NaN	NaN	NaN	NaN	NaN	NaN	NaN	NaN	NaN	NaN	NaN	NaN	NaN	NaN	NaN	NaN	NaN	NaN	NaN	NaN	NaN	NaN	NaN	NaN	NaN	NaN	NaN	NaN	NaN	NaN	NaN	NaN
NaN	NaN	NaN	NaN	NaN	NaN	NaN	NaN	NaN	NaN	NaN	NaN	NaN	NaN	NaN	NaN	NaN	NaN	NaN	NaN	NaN	NaN	NaN	NaN	NaN	NaN	NaN	NaN	NaN	NaN	NaN	NaN	NaN	NaN	NaN	NaN	NaN	NaN	NaN	NaN	NaN	NaN	NaN	NaN	NaN	NaN	NaN	NaN	NaN	NaN
NaN	NaN	NaN	NaN	NaN	NaN	NaN	NaN	NaN	NaN	NaN	NaN	NaN	NaN	NaN	NaN	NaN	NaN	1.4026	NaN	NaN	NaN	NaN	1.9751	NaN	1.5301	NaN	NaN	NaN	2.6702	NaN	NaN	0.923	1.1392	NaN	NaN	NaN	1.2876	NaN	NaN	NaN	NaN	NaN	NaN	NaN	NaN	NaN	NaN	NaN	NaN
NaN	NaN	NaN	NaN	NaN	NaN	NaN	NaN	NaN	NaN	NaN	NaN	NaN	NaN	NaN	NaN	NaN	NaN	NaN	NaN	NaN	NaN	NaN	NaN	NaN	NaN	NaN	NaN	NaN	NaN	NaN	NaN	NaN	NaN	NaN	NaN	NaN	NaN	NaN	NaN	NaN	NaN	NaN	NaN	NaN	NaN	NaN	NaN	NaN	NaN
NaN	1.0287	NaN	0.64178	NaN	NaN	NaN	0.43761	0.4845	NaN	0.3724	NaN	NaN	NaN	NaN	NaN	NaN	NaN	NaN	NaN	NaN	NaN	NaN	NaN	NaN	NaN	NaN	NaN	NaN	NaN	NaN	NaN	NaN	NaN	NaN	NaN	NaN	NaN	NaN	NaN	NaN	NaN	NaN	NaN	NaN	NaN	NaN	NaN	NaN	NaN
NaN	NaN	NaN	NaN	NaN	NaN	NaN	NaN	NaN	NaN	NaN	NaN	NaN	NaN	NaN	NaN	NaN	NaN	NaN	1.2374	NaN	NaN	NaN	NaN	NaN	NaN	NaN	NaN	NaN	NaN	NaN	NaN	NaN	NaN	NaN	NaN	NaN	NaN	NaN	NaN	NaN	NaN	NaN	NaN	NaN	NaN	NaN	NaN	NaN	NaN
1.036	1.2617	1.0143	0.99973	0.95085	0.96389	0.9666	1.0527	0.95211	0.79733	1.0322	0.87087	0.96563	0.95136	0.75673	0.46793	0.70331	0.1902	1.4235	1.9936	1.6638	1.5172	1.98	1.9285	1.1742	1.2829	1.9743	2.1138	1.7366	1.8038	2.2719	2.0538	1.8684	1.7053	1.1095	0.9763	1.0282	1.5145	1.2808	1.1295	0.86057	1.3229	1.2626	1.0192	0.99812	1.0713	0.88139	1.3976	1.1935	1.478
0.97383	1.1911	1.0433	1.0285	1.2903	NaN	1.1133	1.204	0.63345	1.2078	1.0818	0.6791	0.53485	0.35921	NaN	NaN	NaN	0.57929	1.3672	0.94461	NaN	1.3257	NaN	NaN	NaN	1.9115	NaN	NaN	NaN	1.5343	0.91096	NaN	NaN	NaN	NaN	NaN	0.98365	1.0437	1.1122	0.97932	NaN	0.88084	1.26	1.0282	NaN	1.2115	1.0801	0.78709	NaN	NaN
1.1608	NaN	NaN	NaN	NaN	0.84745	NaN	NaN	NaN	NaN	0.88279	NaN	NaN	NaN	NaN	NaN	NaN	NaN	NaN	NaN	NaN	NaN	NaN	NaN	NaN	NaN	NaN	NaN	NaN	NaN	NaN	NaN	NaN	NaN	NaN	NaN	NaN	NaN	NaN	NaN	NaN	NaN	NaN	NaN	NaN	NaN	NaN	NaN	NaN	NaN
1.0697	1.2682	0.83621	0.75587	0.735	0.8345	NaN	NaN	0.60238	0.40874	0.55792	NaN	NaN	NaN	NaN	NaN	NaN	NaN	1.5152	NaN	NaN	NaN	NaN	0.94576	NaN	1.9064	NaN	NaN	1.7088	NaN	NaN	NaN	NaN	NaN	NaN	NaN	NaN	1.0196	0.91191	0.7933	NaN	1.0922	NaN	1.0799	NaN	NaN	NaN	NaN	NaN	NaN
1.0435	0.87555	0.93563	NaN	0.62612	0.68146	0.65317	0.81619	0.60238	0.63857	NaN	NaN	NaN	NaN	NaN	NaN	NaN	NaN	NaN	NaN	1.2177	1.6131	1.629	NaN	1.7215	NaN	1.9916	1.797	NaN	0.93821	0.45418	NaN	NaN	NaN	NaN	NaN	NaN	NaN	0.91191	NaN	0.95705	NaN	1.0496	NaN	NaN	0.83773	0.48835	NaN	NaN	NaN
1.0697	1.0537	0.88516	0.77738	0.67838	0.8345	0.80206	0.81619	0.60238	0.51089	0.7018	NaN	NaN	NaN	NaN	NaN	NaN	NaN	1.5152	1.4764	1.0657	1.0957	1.3374	0.94576	1.7215	1.4137	1.3211	1.797	1.3784	0.78664	0.45418	NaN	NaN	NaN	NaN	NaN	1.4693	1.0196	0.91092	0.75595	0.95705	0.84687	1.0496	0.85814	NaN	0.83773	0.48835	NaN	NaN	NaN
0.93217	0.79402	0.82748	0.71975	0.72744	0.79624	0.72977	0.704	0.6502	0.70276	0.47263	0.44208	0.24162	0.19984	NaN	NaN	0.092183	NaN	1.3216	1.3828	1.3827	0.86701	1.7479	1.7627	1.5728	1.5519	1.2085	1.3562	1.556	1.0566	NaN	0.52046	NaN	NaN	NaN	NaN	0.73933	NaN	0.87166	0.81629	1.0848	0.87559	0.82118	1.0732	0.76772	NaN	0.97556	NaN	0.3637	NaN
0.79258	0.79213	0.75723	0.66974	0.61966	0.83122	0.72699	0.70717	0.6502	0.59235	0.56661	0.4074	0.24162	0.19984	NaN	NaN	0.092183	NaN	1.3216	1.3828	1.3827	0.86701	1.7479	1.7627	NaN	1.5519	NaN	NaN	1.556	NaN	NaN	0.52046	NaN	NaN	NaN	NaN	NaN	NaN	NaN	0.78439	NaN	0.99658	0.8014	1.092	0.77764	NaN	0.82356	NaN	0.3637	NaN
1.0963	0.79592	0.80297	0.84285	0.72484	0.98099	1.1956	0.70084	0.69186	0.83374	0.96039	1.0217	NaN	NaN	NaN	NaN	0.64922	NaN	1.3216	1.3828	1.3827	0.86701	1.7479	1.7627	1.5728	1.5519	1.2085	1.3562	1.556	1.0566	NaN	0.52046	NaN	NaN	NaN	NaN	0.73933	NaN	0.87166	0.84947	1.0848	0.76929	0.84145	1.0547	0.75792	NaN	1.1556	NaN	2.719	NaN
0.37997	0.79402	0.80297	0.84285	0.71047	0.98099	1.1956	0.704	0.69186	0.70276	0.96039	1.5352	2.7284	0.19984	4.1431	NaN	3.7676	2.0489	1.3216	1.3828	1.3827	0.86701	1.7479	1.7627	1.5728	1.5519	1.2085	1.3562	1.556	1.0566	NaN	0.52046	NaN	NaN	NaN	NaN	0.92322	NaN	1.2688	0.71615	1.1828	1.1071	0.98704	0.62187	0.66987	0.57725	1.4022	NaN	2.719	2.3123
1.0063	1.1242	0.74431	0.84965	0.8605	0.86272	0.75301	0.8691	0.70356	0.63969	0.77072	0.57421	0.30137	0.21535	0.12252	0.12419	0.12771	NaN	NaN	1.5071	1.0904	0.7669	1.6913	1.5968	1.5455	1.8009	1.7391	1.7491	1.3097	1.1938	0.97777	0.59935	0.39459	0.28113	0.15724	0.26432	0.96972	1.0921	0.67682	0.83511	1.0042	1.141	0.7496	0.85264	0.87431	0.83388	0.87278	0.6144	0.39717	0.29534
NaN	NaN	NaN	NaN	NaN	NaN	NaN	NaN	NaN	NaN	NaN	NaN	1.4208	NaN	NaN	NaN	NaN	NaN	NaN	NaN	NaN	NaN	NaN	NaN	NaN	NaN	NaN	NaN	NaN	NaN	NaN	NaN	NaN	NaN	NaN	NaN	NaN	NaN	NaN	NaN	NaN	NaN	NaN	NaN	NaN	NaN	NaN	NaN	NaN	NaN
0.92474	0.47807	0.97655	NaN	0.58409	0.66165	0.53008	NaN	NaN	NaN	0.37933	NaN	NaN	NaN	NaN	NaN	NaN	NaN	NaN	NaN	NaN	NaN	NaN	NaN	NaN	NaN	NaN	NaN	NaN	NaN	NaN	NaN	NaN	NaN	NaN	NaN	NaN	NaN	NaN	NaN	NaN	NaN	NaN	NaN	NaN	NaN	NaN	NaN	NaN	NaN
NaN	NaN	NaN	NaN	NaN	NaN	NaN	NaN	NaN	NaN	NaN	NaN	NaN	NaN	NaN	NaN	NaN	NaN	NaN	NaN	NaN	NaN	NaN	NaN	NaN	NaN	NaN	NaN	NaN	NaN	NaN	NaN	NaN	NaN	NaN	NaN	0.88323	NaN	0.955	0.72433	0.37747	NaN	NaN	0.56777	NaN	NaN	NaN	NaN	NaN	NaN
0.92474	0.47807	0.97655	NaN	0.58409	0.66165	0.53008	NaN	NaN	NaN	0.37933	NaN	NaN	NaN	NaN	NaN	NaN	NaN	NaN	NaN	NaN	NaN	NaN	NaN	NaN	NaN	NaN	NaN	NaN	NaN	NaN	NaN	NaN	NaN	NaN	NaN	0.88323	NaN	0.955	0.72433	0.37747	NaN	NaN	0.56777	NaN	NaN	NaN	NaN	NaN	NaN
NaN	NaN	NaN	0.57735	NaN	NaN	NaN	1.0993	0.75032	NaN	NaN	NaN	1.321	NaN	0.85964	0.79822	NaN	NaN	NaN	1.1953	NaN	1.5461	1.5667	2.7931	2.4162	NaN	1.7573	NaN	NaN	NaN	2.0188	2.5193	NaN	NaN	1.5667	1.1811	NaN	NaN	NaN	NaN	NaN	NaN	NaN	NaN	NaN	NaN	NaN	NaN	NaN	NaN
NaN	NaN	0.63227	0.66092	NaN	NaN	0.8504	1.1067	NaN	0.56666	NaN	0.509	NaN	NaN	NaN	NaN	0.24324	NaN	1.375	NaN	1.4872	NaN	NaN	NaN	NaN	2.6141	NaN	1.6951	NaN	NaN	NaN	NaN	NaN	NaN	NaN	NaN	NaN	NaN	NaN	0.71265	1.5103	NaN	1.0914	NaN	NaN	NaN	NaN	NaN	NaN	NaN
1.0262	1.3025	1.2153	0.57605	1.5125	1.1783	0.84717	0.92456	0.3343	0.51838	0.92168	0.45646	0.21017	0.15451	0.13652	0.17431	0.31033	0.1603	1.2296	0.80701	1.311	0.84657	1.6914	0.92803	2.2271	2.1201	1.8627	1.773	1.1221	0.80348	0.71255	0.20078	NaN	0.19066	0.22317	0.34122	1.009	1.2753	0.78376	1.1003	1.3296	0.86972	0.85139	0.58135	0.5549	0.56214	0.30339	0.17879	0.22795	NaN
NaN	NaN	NaN	NaN	NaN	NaN	NaN	NaN	NaN	NaN	NaN	NaN	NaN	NaN	NaN	NaN	NaN	NaN	NaN	NaN	NaN	NaN	NaN	NaN	NaN	NaN	NaN	NaN	NaN	NaN	NaN	NaN	NaN	NaN	NaN	NaN	NaN	NaN	NaN	NaN	NaN	NaN	NaN	NaN	NaN	NaN	NaN	NaN	NaN	NaN
NaN	NaN	NaN	NaN	NaN	NaN	NaN	NaN	NaN	NaN	0.77527	NaN	0.85778	NaN	NaN	NaN	NaN	NaN	NaN	NaN	0.83359	1.1246	2.8162	2.7135	NaN	1.9978	2.1378	2.0707	1.5327	NaN	NaN	NaN	1.5021	1.225	0.65327	0.78345	NaN	NaN	NaN	NaN	NaN	1.4794	NaN	1.401	NaN	1.4655	NaN	1.7417	NaN	NaN
0.81238	1.2211	0.716	NaN	0.6602	0.92397	0.77862	1.0657	1.2911	1.0574	0.77527	0.74949	0.85778	0.70591	0.45531	0.32353	0.40471	NaN	1.3551	NaN	0.83359	1.1246	2.8162	NaN	1.4426	1.9978	2.1378	2.0707	1.5327	2.0509	2.0221	2.0526	1.5021	1.225	0.65327	0.78345	1.004	1.7286	1.0549	1.147	1.1738	1.4794	1.1631	1.401	1.3635	1.4655	1.9554	1.7417	1.3198	1.1654
NaN	NaN	NaN	NaN	NaN	NaN	NaN	NaN	NaN	NaN	NaN	NaN	NaN	NaN	NaN	NaN	NaN	NaN	NaN	NaN	NaN	NaN	NaN	NaN	NaN	NaN	NaN	NaN	NaN	NaN	NaN	NaN	NaN	NaN	NaN	NaN	NaN	NaN	NaN	NaN	NaN	NaN	NaN	NaN	NaN	NaN	NaN	NaN	NaN	NaN
NaN	NaN	NaN	NaN	NaN	NaN	NaN	NaN	NaN	NaN	NaN	NaN	NaN	NaN	NaN	NaN	NaN	NaN	NaN	NaN	NaN	NaN	NaN	NaN	NaN	NaN	NaN	NaN	NaN	NaN	NaN	NaN	NaN	NaN	NaN	NaN	NaN	NaN	NaN	NaN	NaN	NaN	NaN	NaN	NaN	NaN	NaN	NaN	NaN	NaN
NaN	NaN	NaN	NaN	NaN	NaN	NaN	NaN	NaN	NaN	NaN	NaN	NaN	NaN	NaN	NaN	NaN	NaN	NaN	NaN	NaN	NaN	NaN	NaN	NaN	NaN	NaN	NaN	NaN	NaN	NaN	NaN	NaN	NaN	NaN	NaN	NaN	NaN	NaN	NaN	NaN	NaN	NaN	NaN	NaN	NaN	NaN	NaN	NaN	NaN
NaN	NaN	NaN	NaN	NaN	NaN	NaN	NaN	NaN	NaN	NaN	NaN	NaN	NaN	NaN	NaN	NaN	NaN	NaN	NaN	NaN	NaN	NaN	NaN	NaN	NaN	NaN	NaN	NaN	NaN	NaN	NaN	NaN	NaN	NaN	NaN	NaN	NaN	NaN	NaN	NaN	NaN	NaN	NaN	NaN	NaN	NaN	NaN	NaN	NaN
NaN	NaN	NaN	NaN	NaN	NaN	NaN	NaN	NaN	NaN	NaN	NaN	NaN	NaN	NaN	NaN	NaN	NaN	NaN	NaN	NaN	NaN	NaN	NaN	NaN	NaN	NaN	NaN	NaN	NaN	NaN	NaN	NaN	NaN	NaN	NaN	NaN	NaN	NaN	NaN	NaN	NaN	NaN	NaN	NaN	NaN	NaN	NaN	NaN	NaN
NaN	NaN	NaN	NaN	NaN	NaN	NaN	NaN	NaN	NaN	NaN	NaN	NaN	NaN	NaN	NaN	NaN	NaN	1.6546	NaN	NaN	NaN	2.0453	NaN	NaN	NaN	NaN	1.9105	0.95941	NaN	NaN	NaN	NaN	NaN	NaN	NaN	NaN	NaN	NaN	NaN	NaN	NaN	NaN	NaN	NaN	NaN	NaN	NaN	NaN	NaN
NaN	NaN	NaN	NaN	NaN	NaN	NaN	NaN	NaN	NaN	NaN	NaN	NaN	NaN	NaN	NaN	NaN	NaN	NaN	NaN	NaN	NaN	NaN	NaN	NaN	NaN	NaN	NaN	NaN	NaN	NaN	NaN	NaN	NaN	NaN	NaN	NaN	NaN	NaN	NaN	NaN	NaN	NaN	NaN	NaN	NaN	NaN	NaN	NaN	NaN
NaN	1.141	NaN	NaN	NaN	NaN	0.84699	NaN	NaN	NaN	NaN	NaN	NaN	NaN	NaN	NaN	NaN	NaN	NaN	NaN	NaN	NaN	NaN	NaN	NaN	NaN	NaN	NaN	NaN	NaN	NaN	NaN	NaN	NaN	NaN	NaN	NaN	NaN	NaN	NaN	NaN	1.2913	NaN	NaN	NaN	NaN	NaN	0.98434	NaN	NaN
1.2218	1.0977	0.75444	1.0519	0.72064	1.0029	0.84699	0.76866	1.069	0.68948	0.58812	0.46493	0.42854	0.44437	0.36255	0.1527	0.2518	0.079017	1.2215	3.1723	0.8899	0.95428	2.0438	2.2436	1.2846	1.5807	2.0204	1.672	1.4373	1.6399	1.1534	0.95822	1.0169	0.71577	0.3241	0.41875	1.1278	1.3394	1.0238	1.0258	0.79773	1.2913	1.0136	1.3557	1.03	0.88356	1.2982	0.98434	0.66163	0.60466
NaN	NaN	NaN	NaN	NaN	NaN	NaN	NaN	NaN	NaN	NaN	NaN	NaN	NaN	NaN	NaN	NaN	NaN	NaN	NaN	NaN	NaN	NaN	NaN	NaN	1.929	NaN	NaN	NaN	NaN	NaN	NaN	NaN	NaN	NaN	NaN	NaN	NaN	NaN	NaN	NaN	NaN	NaN	NaN	NaN	NaN	NaN	NaN	NaN	NaN
1.0216	1.0045	0.83417	0.69102	0.78143	0.79547	0.70016	0.74826	0.61563	0.58471	NaN	0.63641	0.50096	0.44787	0.41034	0.24698	0.43433	0.20803	1.2476	1.4218	1.3558	1.2855	1.4937	1.3627	1.244	1.2961	1.2609	1.2869	1.386	1.2839	1.0725	NaN	0.82257	0.72795	0.6266	0.47541	0.99837	1.0745	0.8828	0.82249	NaN	NaN	0.83217	0.77393	0.68757	0.74604	0.88288	0.80238	0.71507	0.66835
NaN	0.97198	NaN	NaN	NaN	NaN	NaN	0.73066	NaN	NaN	NaN	NaN	NaN	NaN	NaN	NaN	NaN	NaN	NaN	1.4271	NaN	NaN	NaN	NaN	1.3489	NaN	NaN	NaN	NaN	NaN	NaN	0.94281	NaN	NaN	NaN	NaN	1.0053	1.0696	0.94306	0.8656	0.81788	0.87348	0.87931	0.83524	NaN	NaN	NaN	NaN	NaN	NaN
NaN	0.97198	0.80488	0.68661	NaN	NaN	NaN	NaN	0.60832	0.58138	NaN	NaN	NaN	NaN	NaN	NaN	0.41254	0.19852	NaN	1.4271	1.2562	NaN	NaN	NaN	NaN	NaN	NaN	NaN	NaN	1.2839	1.0725	0.94281	NaN	0.72795	NaN	0.47541	NaN	NaN	NaN	NaN	NaN	NaN	NaN	NaN	1.7085	NaN	2.5717	0.80238	0.71507	NaN
1.0473	1.0045	0.86452	0.69547	1.3954	0.80429	1.7198	1.9628	1.832	0.58806	2.4022	3.3172	0.50646	4.7039	4.2462	0.24698	0.45727	2.1241	1.2697	1.4218	1.3558	1.3506	1.5803	NaN	1.3489	NaN	1.3456	1.3036	1.386	5.4451	NaN	NaN	NaN	NaN	0.6266	NaN	1.0053	1.0696	0.94306	0.8656	0.81788	0.87348	0.87931	0.83524	0.68757	0.74604	NaN	NaN	NaN	4.446
NaN	NaN	NaN	NaN	NaN	NaN	NaN	NaN	NaN	NaN	NaN	NaN	NaN	NaN	NaN	NaN	NaN	NaN	NaN	NaN	NaN	NaN	NaN	NaN	NaN	NaN	NaN	NaN	NaN	NaN	NaN	NaN	NaN	NaN	NaN	NaN	NaN	NaN	NaN	NaN	NaN	NaN	NaN	NaN	NaN	NaN	NaN	NaN	NaN	NaN
NaN	NaN	NaN	0.61492	0.91479	0.68174	NaN	NaN	NaN	0.51087	NaN	NaN	0.5213	0.40114	NaN	0.18867	0.36338	0.17454	NaN	NaN	NaN	NaN	NaN	0.99636	1.3227	NaN	NaN	NaN	NaN	NaN	NaN	1.7841	NaN	0.60752	NaN	NaN	1.1111	NaN	NaN	0.84213	0.81399	NaN	NaN	NaN	0.85599	NaN	1.1156	0.74927	NaN	NaN
NaN	NaN	NaN	NaN	NaN	NaN	0.80051	NaN	1.7063	NaN	NaN	NaN	1.2497	NaN	NaN	NaN	NaN	NaN	NaN	NaN	NaN	NaN	NaN	NaN	NaN	NaN	NaN	NaN	NaN	NaN	NaN	NaN	NaN	NaN	NaN	NaN	NaN	NaN	NaN	NaN	NaN	NaN	NaN	NaN	NaN	NaN	NaN	NaN	NaN	NaN
NaN	NaN	NaN	NaN	NaN	NaN	NaN	NaN	NaN	NaN	NaN	NaN	NaN	NaN	NaN	NaN	NaN	NaN	NaN	NaN	NaN	NaN	NaN	NaN	NaN	NaN	NaN	NaN	NaN	NaN	NaN	NaN	NaN	NaN	NaN	NaN	NaN	NaN	NaN	NaN	NaN	NaN	NaN	NaN	NaN	NaN	NaN	NaN	NaN	NaN
1.0768	1.0588	0.93652	0.64753	0.96545	0.89541	0.78276	0.88543	0.5625	0.64238	0.82713	0.67763	0.51376	0.45529	0.4207	0.24864	0.37378	0.15661	1.239	1.0927	1.5434	1.3866	1.6594	1.3112	1.4539	1.44	1.3492	1.6059	1.7192	NaN	1.1052	0.91696	0.74972	0.68081	0.59067	0.411	1.0066	0.97413	0.87894	0.95369	1.0188	0.97433	0.94928	0.69949	0.8015	0.77976	0.8163	0.70296	0.66757	0.79904
NaN	NaN	NaN	NaN	NaN	NaN	0.69641	NaN	NaN	NaN	0.79117	NaN	NaN	NaN	NaN	NaN	NaN	NaN	1.4947	NaN	NaN	NaN	NaN	NaN	NaN	NaN	1.5954	1.6059	NaN	1.4507	1.1052	NaN	NaN	NaN	0.59067	0.411	1.0363	1.258	NaN	NaN	1.1094	NaN	NaN	NaN	0.69872	NaN	NaN	NaN	NaN	NaN
NaN	NaN	NaN	NaN	NaN	0.52823	NaN	NaN	NaN	NaN	NaN	NaN	NaN	NaN	NaN	NaN	NaN	NaN	1.2366	NaN	NaN	NaN	NaN	NaN	NaN	NaN	NaN	NaN	0.51357	NaN	0.18036	NaN	NaN	NaN	NaN	NaN	NaN	0.91209	NaN	0.58108	NaN	NaN	NaN	0.52042	0.31097	NaN	NaN	NaN	NaN	NaN
2.1069	0.93954	NaN	0.96881	1.0701	NaN	0.81477	NaN	0.97889	0.57463	0.93051	0.70493	0.55689	NaN	0.28261	NaN	NaN	0.23135	NaN	1.4486	NaN	NaN	NaN	1.1193	NaN	NaN	NaN	NaN	NaN	NaN	NaN	NaN	NaN	0.57848	NaN	NaN	NaN	NaN	NaN	NaN	NaN	NaN	NaN	NaN	NaN	NaN	NaN	NaN	NaN	NaN
0.8383	1.3767	NaN	NaN	NaN	0.99578	0.87324	1.0568	0.69627	0.95893	0.829	NaN	0.87436	0.80594	1.1482	0.72747	0.76724	NaN	NaN	NaN	NaN	NaN	NaN	1.7617	NaN	NaN	NaN	2.0862	NaN	1.9469	1.5996	NaN	2.1947	NaN	NaN	1.7315	NaN	NaN	NaN	NaN	NaN	NaN	NaN	NaN	NaN	NaN	NaN	NaN	NaN	NaN
NaN	NaN	NaN	NaN	NaN	NaN	NaN	NaN	NaN	NaN	NaN	NaN	NaN	NaN	NaN	NaN	NaN	NaN	NaN	NaN	NaN	NaN	NaN	NaN	NaN	NaN	NaN	NaN	NaN	NaN	NaN	NaN	NaN	NaN	NaN	NaN	NaN	NaN	NaN	NaN	NaN	NaN	NaN	NaN	NaN	NaN	NaN	NaN	NaN	NaN
0.96783	1.0533	0.95288	0.74234	0.79169	0.87013	0.66447	0.68715	0.56222	0.46339	0.48764	0.22822	0.13827	0.10793	0.11024	0.098867	0.16916	0.070317	1.3348	1.4817	1.5403	1.4641	1.3108	1.52	1.4889	2.424	1.4394	1.4115	1.2668	0.88215	0.39788	0.25575	0.22747	0.25175	0.2464	0.22137	0.98557	1.0837	0.96835	NaN	0.87889	1.0233	1.5311	0.69049	NaN	0.4252	0.62534	0.27015	0.17587	0.18941
1.2266	0.96132	1.0975	1.0402	0.62564	0.59465	NaN	1.1694	0.50719	0.82287	0.74499	0.74771	0.65523	0.7816	0.6191	0.47744	1.2997	0.60592	1.3377	NaN	1.4216	1.3065	NaN	NaN	2.0424	NaN	1.7381	1.6409	1.2577	1.4877	1.3768	1.0214	1.2055	0.84109	2.131	1.0553	NaN	NaN	1.0923	0.67815	0.86628	NaN	0.7373	NaN	NaN	NaN	0.67998	0.88827	NaN	NaN
1.0462	1.044	1.2692	0.65248	0.89073	0.91715	0.77173	0.96188	0.77381	0.80321	0.95528	0.92479	0.80305	0.98923	0.82586	0.59127	1.0931	0.40607	1.3576	1.122	1.4509	1.3405	1.583	1.3338	1.5479	1.6283	1.5661	1.6683	1.599	2.0772	1.9638	1.8289	1.5641	2.0472	1.4298	1.3835	1.073	0.83261	0.9732	0.98136	0.95592	1.261	1.0237	0.82006	1.0711	0.94406	1.1131	1.3133	1.2355	1.3269
1.1693	1.1119	0.9785	0.82082	1.0285	0.97989	0.79836	0.9157	0.79224	0.63994	0.86425	0.52605	0.43064	0.4004	0.38709	0.26085	NaN	NaN	NaN	NaN	1.6714	NaN	1.7793	NaN	1.4964	1.7402	1.6639	1.6268	NaN	1.7428	1.1458	0.98414	0.72026	NaN	0.66604	0.478	1.0943	1.2355	1.1317	0.97766	1.1172	1.0245	0.93506	0.85272	0.67528	0.67564	1.006	0.91164	0.57056	0.54221
0.96002	0.78375	1.0476	0.52054	0.92313	0.83514	0.77475	0.81219	0.3822	0.54406	0.82653	0.91536	0.83621	0.67069	0.77793	0.75535	1.1425	0.46673	1.1467	0.70592	1.5405	1.3949	1.2897	0.93097	1.2055	1.3103	1.1495	1.3548	1.4848	1.5062	1.4057	1.0739	1.0241	1.1296	1.5963	1.109	0.90158	0.97026	0.85229	0.77789	0.94163	0.73088	0.81798	0.49981	0.55656	0.72319	0.63995	0.70803	0.86748	0.89877
0.91498	1.0483	0.90073	0.70063	1.1565	0.57482	0.84133	0.9028	0.32304	0.73166	0.92517	0.79792	NaN	NaN	NaN	NaN	NaN	NaN	1.4541	0.79788	1.1668	0.98466	NaN	0.77075	1.0924	1.3774	1.0057	NaN	NaN	1.5227	1.6435	1.0444	1.0318	1.4418	1.0117	0.66958	NaN	NaN	0.81641	0.43254	0.87739	0.73859	0.78995	NaN	0.67388	0.63331	0.99764	1.141	1.0372	1.1573
1.0463	1.5369	NaN	1.2416	1.8194	1.8305	NaN	1.7211	NaN	1.3084	NaN	NaN	2.0978	1.7199	1.487	1.0783	1.9677	1.5992	1.4123	3.2114	NaN	NaN	NaN	2.6539	NaN	2.7527	NaN	2.6998	NaN	3.0816	3.0927	NaN	3.3982	3.1952	2.5292	NaN	1.1729	2.2096	1.4895	2.0005	NaN	1.7962	1.604	1.7948	NaN	NaN	NaN	NaN	NaN	2.1621
NaN	NaN	NaN	NaN	NaN	NaN	NaN	NaN	NaN	NaN	1.6215	NaN	NaN	NaN	NaN	NaN	NaN	NaN	NaN	NaN	NaN	NaN	NaN	NaN	2.9371	NaN	NaN	NaN	NaN	NaN	NaN	NaN	NaN	NaN	NaN	NaN	NaN	NaN	NaN	NaN	NaN	NaN	NaN	NaN	NaN	NaN	NaN	NaN	NaN	NaN
NaN	NaN	NaN	NaN	NaN	NaN	1.4257	NaN	NaN	NaN	NaN	NaN	NaN	NaN	NaN	NaN	NaN	NaN	NaN	NaN	NaN	NaN	NaN	NaN	NaN	NaN	NaN	NaN	NaN	NaN	NaN	NaN	NaN	NaN	NaN	NaN	NaN	NaN	NaN	NaN	NaN	NaN	NaN	NaN	NaN	NaN	NaN	NaN	NaN	NaN
NaN	NaN	NaN	NaN	NaN	NaN	NaN	NaN	NaN	NaN	NaN	0.63806	0.63475	NaN	NaN	NaN	NaN	NaN	NaN	NaN	NaN	NaN	NaN	NaN	NaN	NaN	NaN	NaN	NaN	NaN	NaN	NaN	NaN	NaN	NaN	NaN	NaN	NaN	NaN	NaN	NaN	NaN	NaN	NaN	NaN	NaN	NaN	NaN	1.0065	1.3468
1.0753	1.1384	0.85687	0.88388	0.59818	0.88675	0.84667	0.78082	0.76446	0.70788	0.67246	NaN	NaN	0.81391	0.66305	0.41526	NaN	NaN	NaN	2.299	1.5453	2.0077	1.3596	1.8697	1.7827	1.3171	1.5834	1.7705	1.6049	1.7407	1.2631	1.4903	NaN	1.3996	1.0659	0.97694	0.97518	1.376	1.2708	0.87679	0.78627	1.0918	1.0562	0.99725	NaN	1.0619	0.9765	1.2168	NaN	NaN
NaN	NaN	NaN	NaN	NaN	NaN	NaN	NaN	NaN	NaN	NaN	NaN	NaN	NaN	NaN	NaN	NaN	NaN	1.4252	NaN	NaN	NaN	NaN	NaN	NaN	NaN	NaN	NaN	NaN	NaN	NaN	NaN	NaN	NaN	NaN	NaN	NaN	NaN	NaN	NaN	NaN	1.0918	NaN	NaN	NaN	NaN	NaN	NaN	NaN	NaN
NaN	1.1359	0.76216	0.92586	0.74163	NaN	0.73119	NaN	1.2352	0.81365	NaN	NaN	0.5622	0.62792	NaN	NaN	NaN	NaN	1.3469	2.4605	1.3586	NaN	NaN	2.0061	1.6696	1.3766	1.6605	NaN	1.5729	1.633	NaN	NaN	NaN	NaN	NaN	NaN	1.0017	NaN	0.7233	0.79801	1.9132	1.2805	0.84459	1.281	1.0663	0.9002	1.3823	1.6773	1.5672	1.2251
1.2933	1.5222	NaN	0.99996	NaN	NaN	NaN	1.2646	1.1464	0.87932	NaN	NaN	0.95105	1.0622	NaN	NaN	1.2385	0.55462	1.2615	NaN	1.2795	0.87641	2.0542	NaN	1.8171	2.2385	NaN	NaN	NaN	1.2865	NaN	NaN	2.203	2.154	NaN	NaN	NaN	1.5753	NaN	NaN	NaN	NaN	0.95006	NaN	NaN	NaN	1.4614	NaN	NaN	1.7702
0.90763	1.1343	0.58215	0.99736	0.77139	1.0064	0.8192	1.0705	0.82054	0.84851	0.94769	0.77392	1.0025	0.95323	0.72448	0.56054	1.2881	0.45433	0.97129	2.0046	0.95712	0.85049	1.4352	2.5347	1.6023	1.6396	1.6678	1.9758	1.425	2.0183	2.4078	2.3234	1.728	2.0016	1.3204	1.7262	1.0735	1.1855	0.69402	0.90572	0.86415	1.2449	0.84797	1.0043	1.2955	1.0886	1.0785	1.2667	1.3782	1.598
0.92925	1.1642	0.54696	1.0085	0.63653	0.87858	0.75653	0.95638	0.89756	0.853	0.72177	0.65655	0.91091	1.0585	0.61604	0.46094	0.88612	0.28084	1.6006	2.4237	0.8857	0.79013	NaN	2.5347	1.805	1.8372	2.1859	1.9758	1.4835	1.7426	2.2469	2.3234	2.2322	2.0096	1.0419	1.3668	1.0735	1.2786	0.78125	1.053	0.82748	1.2449	0.74884	1.088	1.3556	1.1121	1.1186	1.207	1.3537	1.3857
1.097	0.82094	0.75546	0.56518	0.65825	0.7154	0.62267	0.75271	0.61156	0.49777	0.63238	0.68311	0.64701	0.71338	0.49812	0.40729	0.87371	0.64379	1.251	1.3383	1.0349	1.054	1.1184	1.0921	1.215	0.99751	1.2727	1.2767	1.2179	1.2182	1.2413	1.5107	1.4354	1.2269	1.3054	1.3144	1.0328	0.87359	0.81075	0.72227	0.64973	0.71406	0.73216	0.91977	0.79619	0.88771	0.76152	0.82767	0.84872	0.93252
NaN	NaN	NaN	NaN	1.8346	NaN	NaN	NaN	NaN	NaN	1.8305	2.4705	1.2276	NaN	0.60854	NaN	0.90412	NaN	0.89237	NaN	1.7941	NaN	NaN	NaN	1.3584	1.6289	1.4162	NaN	NaN	1.02	NaN	0.87138	NaN	0.82836	NaN	0.69093	NaN	NaN	NaN	NaN	NaN	NaN	NaN	NaN	NaN	NaN	NaN	NaN	NaN	NaN
NaN	NaN	1.4573	NaN	NaN	NaN	1.1844	1.0211	NaN	0.90253	NaN	0.94999	0.90277	NaN	NaN	0.95261	1.1803	1.0019	NaN	1.2056	NaN	1.8908	1.5448	1.6529	NaN	NaN	NaN	1.7384	NaN	NaN	NaN	1.6372	1.6553	NaN	NaN	1.4903	NaN	NaN	NaN	NaN	NaN	NaN	1.632	NaN	NaN	1.2759	NaN	NaN	1.572	NaN
NaN	NaN	NaN	NaN	NaN	NaN	NaN	NaN	NaN	NaN	NaN	NaN	NaN	NaN	NaN	NaN	NaN	NaN	NaN	NaN	NaN	NaN	NaN	NaN	NaN	NaN	NaN	NaN	NaN	NaN	NaN	NaN	NaN	NaN	NaN	NaN	NaN	NaN	NaN	NaN	NaN	NaN	NaN	NaN	NaN	NaN	NaN	NaN	NaN	NaN
1.1767	NaN	NaN	0.97088	NaN	NaN	NaN	1.0922	0.68335	NaN	0.77866	NaN	NaN	NaN	NaN	NaN	NaN	NaN	NaN	NaN	NaN	NaN	NaN	NaN	NaN	NaN	NaN	0.62202	NaN	NaN	NaN	NaN	NaN	NaN	NaN	NaN	NaN	1.1301	NaN	NaN	NaN	NaN	NaN	0.5385	NaN	NaN	0.39908	0.28495	NaN	0.19626
NaN	NaN	NaN	NaN	NaN	NaN	NaN	NaN	NaN	NaN	NaN	NaN	NaN	NaN	NaN	NaN	NaN	NaN	NaN	NaN	NaN	NaN	NaN	NaN	NaN	NaN	NaN	NaN	NaN	NaN	NaN	NaN	NaN	NaN	NaN	NaN	NaN	NaN	NaN	NaN	NaN	NaN	NaN	NaN	NaN	NaN	NaN	NaN	NaN	NaN
NaN	NaN	NaN	NaN	NaN	NaN	NaN	NaN	NaN	NaN	NaN	0.62916	NaN	NaN	NaN	NaN	NaN	NaN	NaN	NaN	NaN	NaN	NaN	NaN	NaN	NaN	NaN	NaN	NaN	NaN	NaN	NaN	NaN	NaN	NaN	NaN	NaN	NaN	NaN	NaN	NaN	NaN	NaN	NaN	NaN	NaN	NaN	NaN	NaN	NaN
NaN	NaN	NaN	NaN	0.56655	0.4579	NaN	NaN	NaN	NaN	NaN	NaN	NaN	NaN	NaN	NaN	NaN	NaN	NaN	NaN	NaN	NaN	NaN	NaN	NaN	NaN	NaN	NaN	NaN	NaN	NaN	NaN	NaN	NaN	NaN	NaN	1.0127	NaN	NaN	NaN	NaN	NaN	NaN	NaN	NaN	NaN	NaN	NaN	NaN	NaN
NaN	NaN	NaN	NaN	NaN	NaN	NaN	0.34816	NaN	NaN	0.30065	NaN	NaN	NaN	NaN	NaN	NaN	NaN	NaN	NaN	NaN	NaN	NaN	NaN	NaN	NaN	NaN	NaN	NaN	NaN	NaN	NaN	NaN	NaN	NaN	NaN	NaN	NaN	NaN	NaN	NaN	NaN	NaN	NaN	NaN	NaN	NaN	NaN	NaN	NaN
0.63856	NaN	NaN	NaN	NaN	2.6372	1.2022	NaN	NaN	NaN	NaN	NaN	NaN	NaN	NaN	NaN	NaN	NaN	NaN	NaN	NaN	NaN	NaN	NaN	NaN	NaN	NaN	NaN	NaN	NaN	NaN	NaN	NaN	NaN	NaN	NaN	NaN	NaN	NaN	NaN	NaN	1.4172	NaN	NaN	2.3354	NaN	NaN	NaN	NaN	NaN
NaN	NaN	NaN	NaN	NaN	NaN	NaN	NaN	NaN	NaN	NaN	NaN	NaN	NaN	NaN	NaN	NaN	NaN	NaN	NaN	NaN	NaN	NaN	NaN	NaN	NaN	NaN	NaN	NaN	NaN	NaN	NaN	NaN	NaN	NaN	NaN	NaN	NaN	NaN	NaN	NaN	NaN	NaN	NaN	NaN	NaN	NaN	NaN	NaN	NaN
0.97594	NaN	1.3721	0.76802	0.58721	0.13539	0.21236	NaN	3.2741	NaN	4.4122	NaN	NaN	0.60391	NaN	NaN	NaN	NaN	1.2633	0.59049	1.0349	NaN	1.6533	NaN	3.748	0.098961	NaN	NaN	0.12179	0.032117	NaN	2.4758	1.1501	NaN	NaN	0.85574	0.95637	0.5828	0.72398	0.48027	0.046024	0.17742	0.27467	1.9776	NaN	NaN	NaN	NaN	NaN	NaN
0.99785	1.5838	1.6581	1.2462	2.3449	2.4996	2.475	2.6571	0.96609	3.4103	1.8863	2.5668	1.6698	1.4036	0.77173	0.50683	0.8248	0.32515	1.239	1.3071	3.6733	5.5085	0.48573	2.3153	2.4668	3.3505	6.9337	6.3324	7.1201	5.3065	4.0755	5.2413	0.60204	0.66823	1.6875	0.23949	0.95835	1.2173	2.4357	1.5495	1.085	0.73826	2.5952	2.4535	0.51142	1.6014	1.8887	0.65502	NaN	1.9977
0.82788	0.68472	NaN	2.8156	NaN	NaN	3.6879	NaN	NaN	NaN	NaN	2.1479	NaN	NaN	NaN	1.3068	NaN	NaN	NaN	NaN	NaN	2.0076	NaN	1.0961	NaN	2.4849	NaN	2.8161	2.1746	NaN	4.0975	0.84911	NaN	NaN	NaN	1.6934	NaN	NaN	2.1148	NaN	NaN	NaN	NaN	NaN	0.62549	NaN	NaN	NaN	NaN	NaN
0.82788	NaN	0.74033	2.8156	1.2201	1.5465	3.6879	1.8027	1.9359	0.83346	5.1887	2.1479	0.96988	4.9731	NaN	1.3068	NaN	0.61285	0.74143	0.77958	3.161	2.0076	4.7291	1.0961	0.59865	2.4849	0.85406	2.8161	NaN	NaN	4.0975	NaN	NaN	NaN	0.93818	NaN	1.9739	0.99064	NaN	0.73877	1.1833	0.86682	1.2997	1.2319	NaN	0.91174	2.2871	NaN	0.6185	NaN
1.0399	1.3515	0.90691	1.1933	1.2603	1.3061	1.3064	1.5134	1.5378	1.4716	1.6913	1.852	2.435	2.6635	2.3904	2.4328	4.4444	2.4762	1.3929	2.0754	1.1066	1.642	2.56	3.1111	2.6496	2.7043	2.8279	3.621	2.7915	4.1989	0.95351	6.3408	5.5847	8.0707	4.9375	7.7148	1.0273	0.70788	1.3012	1.0538	1.3415	1.4745	1.0292	1.1636	1.1888	1.359	1.1134	1.9658	2.3921	2.3602
1.0488	1.3096	1.1015	1.0415	1.1411	1.0709	1.1242	1.3872	0.98495	1.2173	1.4459	1.8155	1.3757	2.1828	2.0069	2.2255	3.6715	2.0695	1.3778	0.82662	1.1215	0.8491	1.8608	0.79028	1.3845	1.4587	1.0514	1.595	1.6255	2.3997	2.4165	1.1344	2.9503	1.9576	3.0218	4.1298	0.99328	1.3585	0.90176	1.0136	1.192	1.1918	1.2787	0.96927	0.93022	0.96472	1.3852	1.5187	1.5506	1.8295
NaN	0.51837	NaN	NaN	NaN	0.77676	0.58939	NaN	NaN	NaN	NaN	NaN	NaN	NaN	NaN	NaN	1.1667	NaN	1.2081	NaN	1.1231	NaN	NaN	NaN	2.8166	NaN	3.6867	NaN	2.6442	NaN	NaN	NaN	5.389	NaN	4.8379	0.15515	NaN	NaN	NaN	NaN	NaN	NaN	NaN	NaN	NaN	NaN	NaN	NaN	NaN	NaN
NaN	NaN	NaN	NaN	NaN	NaN	NaN	NaN	NaN	NaN	NaN	NaN	NaN	NaN	NaN	NaN	NaN	NaN	NaN	NaN	NaN	NaN	NaN	NaN	NaN	NaN	NaN	NaN	NaN	NaN	NaN	NaN	NaN	NaN	NaN	NaN	0.99876	0.91129	0.89736	NaN	NaN	0.87503	0.80646	0.6102	0.70167	0.7128	0.83157	0.95206	1.0061	NaN
1.0291	1.0911	0.7859	0.4234	0.81744	0.60458	0.53759	0.5352	0.19191	0.40671	0.35767	0.23426	NaN	NaN	NaN	NaN	NaN	NaN	1.267	1.1755	0.99205	1.0299	1.3066	1.4498	1.6863	1.4563	1.2381	0.88197	0.66223	0.48651	0.47592	0.20164	0.25885	NaN	NaN	NaN	0.99392	1.2248	0.80816	0.75208	1.0078	0.68935	0.662	0.55804	0.47797	0.40122	0.33901	0.68825	0.37335	0.17821
0.9794	1.2729	0.68569	0.85545	0.92113	1.0103	0.83742	0.99777	0.70709	0.63614	0.744	0.72132	0.28307	0.47253	0.37254	0.26329	0.43124	0.21283	1.164	2.43	0.70682	0.89128	1.4032	1.2747	1.3768	1.6137	1.1859	1.4856	0.98408	1.5483	0.74841	0.70311	1.0895	0.34536	0.50253	0.57415	1.0359	1.1855	0.95488	0.9128	1.1231	1.1776	0.95646	1.0111	0.98998	0.98919	1.1786	0.95548	0.77883	0.77063
1.1316	1.2662	0.71666	1.0376	1.0147	0.91764	0.84518	0.94977	0.7398	0.7772	0.72108	0.73976	0.59695	0.62838	0.56372	0.55485	0.82033	0.45925	1.404	2.0361	1.2378	1.0065	1.7686	2.0116	1.9947	1.9885	2.0313	1.8991	1.5485	1.8212	1.5073	1.7465	1.6636	1.6057	1.1683	1.479	1.0741	1.6338	0.91597	1.1526	1.2616	1.5266	1.2353	1.1796	1.1656	0.95289	1.256	1.367	1.4254	1.4808
0.86949	NaN	0.49099	NaN	0.43894	NaN	0.44251	0.51242	0.45407	NaN	NaN	0.2259	NaN	NaN	NaN	NaN	0.16523	NaN	NaN	NaN	NaN	NaN	NaN	NaN	NaN	NaN	NaN	NaN	NaN	NaN	NaN	NaN	NaN	NaN	NaN	NaN	0.96243	NaN	NaN	0.62466	0.66154	0.9189	NaN	NaN	NaN	0.56233	0.64187	NaN	0.46439	NaN
NaN	NaN	NaN	0.68428	NaN	0.61573	0.44251	0.51242	NaN	0.44136	0.39724	NaN	0.301	NaN	NaN	NaN	0.16523	NaN	NaN	NaN	NaN	NaN	NaN	NaN	NaN	NaN	NaN	NaN	NaN	NaN	NaN	NaN	NaN	NaN	NaN	NaN	0.96243	NaN	NaN	0.62466	0.66154	0.9189	NaN	NaN	NaN	0.56233	0.64187	NaN	0.46439	NaN
NaN	NaN	NaN	NaN	NaN	NaN	NaN	NaN	NaN	NaN	NaN	NaN	NaN	NaN	NaN	NaN	NaN	NaN	NaN	NaN	NaN	NaN	NaN	NaN	NaN	NaN	NaN	NaN	NaN	NaN	NaN	NaN	NaN	NaN	NaN	NaN	NaN	NaN	NaN	NaN	NaN	NaN	NaN	NaN	NaN	NaN	NaN	NaN	NaN	NaN
1.0561	1.1807	0.72139	0.82002	0.81568	0.82036	0.74903	0.76061	0.67077	0.58544	0.61006	0.48654	0.34501	0.30007	0.17441	0.13974	0.16646	NaN	1.3612	1.7957	1.0578	1.0437	1.6172	1.7721	1.5871	1.6099	1.5351	1.4575	1.1349	1.1422	0.83353	0.67743	0.51869	0.36228	0.21815	0.21831	1.1046	1.0584	0.82473	0.92343	0.91565	0.95063	0.81089	0.8332	0.75751	0.60085	0.71229	0.62363	0.46955	0.46794
0.97156	1.3478	0.8206	0.71699	1.4654	0.97654	1.1468	NaN	NaN	NaN	1.1162	1.0863	NaN	0.87606	NaN	0.54055	NaN	0.48374	1.4279	1.5061	1.3787	0.92466	1.7556	1.5046	1.9072	2.0258	1.8213	1.5279	1.2716	1.8066	1.9485	1.4531	1.1555	0.98976	NaN	0.83096	1.0706	1.3503	0.81076	0.96749	1.3799	1.2938	1.0713	0.72495	0.91272	1.1678	1.0403	1.0729	1.1959	NaN
NaN	1.1252	0.60795	0.92361	NaN	NaN	0.87934	0.92125	1.0411	0.88336	0.99286	NaN	1.0316	1.2296	0.94478	0.86463	1.2101	0.47196	NaN	NaN	NaN	0.76628	1.8902	1.8995	1.6863	1.8278	NaN	NaN	1.3837	1.9488	2.0323	2.4932	1.9973	2.5353	1.593	2.1042	1.0459	1.5038	0.81441	1.4512	1.0822	1.2561	0.80359	1.16	1.7821	1.2899	1.6113	1.6608	1.5485	2.0198
NaN	NaN	NaN	NaN	NaN	NaN	NaN	NaN	NaN	NaN	NaN	NaN	NaN	NaN	NaN	NaN	NaN	NaN	NaN	NaN	NaN	NaN	NaN	NaN	NaN	NaN	NaN	NaN	NaN	NaN	NaN	NaN	NaN	NaN	NaN	NaN	NaN	NaN	NaN	NaN	NaN	NaN	NaN	NaN	NaN	NaN	NaN	1.3695	NaN	NaN
1.0542	NaN	NaN	1.039	NaN	1.0166	NaN	1.1107	NaN	0.99062	NaN	NaN	1.1667	1.3792	1.0883	0.8182	1.479	0.72207	1.6957	1.8826	1.1999	NaN	1.8285	NaN	NaN	2.2361	2.1469	2.07	1.6165	NaN	2.4915	NaN	NaN	2.6965	2.0022	2.1464	NaN	NaN	0.97097	1.0918	1.2366	NaN	NaN	1.096	1.2124	1.2964	1.5688	NaN	NaN	1.7881
NaN	NaN	NaN	NaN	NaN	NaN	NaN	NaN	NaN	NaN	NaN	NaN	NaN	NaN	NaN	NaN	NaN	NaN	NaN	NaN	NaN	NaN	NaN	NaN	NaN	NaN	NaN	NaN	NaN	NaN	NaN	NaN	NaN	NaN	NaN	NaN	NaN	NaN	NaN	1.2902	NaN	NaN	NaN	NaN	NaN	NaN	NaN	NaN	NaN	NaN
NaN	NaN	NaN	1.1596	1.3116	NaN	1.2705	1.4427	0.96123	NaN	1.4676	1.414	1.0773	0.97498	1.0028	NaN	NaN	NaN	NaN	NaN	1.6944	1.2375	2.1265	2.334	2.2977	3.5861	NaN	2.6279	1.891	2.2657	NaN	2.1922	NaN	NaN	1.271	NaN	NaN	NaN	NaN	NaN	1.6193	NaN	NaN	NaN	NaN	NaN	NaN	NaN	NaN	NaN
NaN	NaN	NaN	NaN	NaN	NaN	NaN	NaN	NaN	NaN	NaN	NaN	NaN	NaN	NaN	NaN	NaN	NaN	NaN	NaN	NaN	NaN	NaN	NaN	NaN	NaN	NaN	NaN	NaN	NaN	NaN	NaN	NaN	NaN	NaN	NaN	NaN	NaN	NaN	NaN	NaN	NaN	NaN	NaN	NaN	NaN	NaN	NaN	NaN	NaN
NaN	NaN	NaN	NaN	NaN	NaN	NaN	NaN	NaN	NaN	NaN	NaN	NaN	NaN	NaN	NaN	NaN	NaN	NaN	NaN	NaN	NaN	NaN	NaN	NaN	NaN	NaN	NaN	NaN	NaN	NaN	NaN	NaN	NaN	NaN	NaN	NaN	NaN	NaN	NaN	NaN	NaN	NaN	NaN	NaN	NaN	NaN	NaN	NaN	NaN
NaN	NaN	NaN	NaN	NaN	NaN	1.7262	NaN	NaN	NaN	1.4682	NaN	NaN	NaN	3.6785	NaN	NaN	2.0113	1.5769	1.7145	NaN	2.7249	NaN	2.6743	1.4669	1.5831	2.5686	1.5781	2.1274	3.428	1.9144	2.2145	2.5329	NaN	2.0138	1.941	1.6344	NaN	1.3565	1.506	1.4575	1.4943	1.1517	0.99732	1.2709	1.0988	1.1747	1.619	NaN	2.1994
NaN	NaN	NaN	NaN	NaN	NaN	NaN	NaN	NaN	NaN	NaN	NaN	NaN	NaN	NaN	NaN	NaN	NaN	1.1654	NaN	1.3846	2.7575	NaN	NaN	NaN	NaN	NaN	NaN	NaN	1.5962	NaN	NaN	NaN	NaN	2.7719	NaN	NaN	NaN	NaN	NaN	NaN	NaN	NaN	NaN	NaN	NaN	NaN	NaN	NaN	NaN
NaN	NaN	0.86678	NaN	NaN	NaN	NaN	NaN	NaN	NaN	NaN	NaN	NaN	NaN	NaN	NaN	NaN	NaN	NaN	NaN	NaN	NaN	NaN	NaN	NaN	NaN	NaN	NaN	NaN	NaN	NaN	NaN	NaN	NaN	NaN	NaN	NaN	NaN	NaN	NaN	NaN	NaN	NaN	NaN	NaN	NaN	NaN	NaN	NaN	NaN
NaN	NaN	NaN	NaN	NaN	NaN	NaN	NaN	NaN	NaN	NaN	NaN	0.60779	NaN	NaN	NaN	NaN	NaN	NaN	13.786	1.6498	NaN	NaN	NaN	NaN	NaN	1.0154	NaN	NaN	NaN	NaN	NaN	1.6648	NaN	NaN	NaN	NaN	NaN	NaN	0.91081	NaN	NaN	NaN	NaN	NaN	NaN	NaN	NaN	0.71939	NaN
NaN	NaN	NaN	NaN	NaN	NaN	NaN	NaN	NaN	NaN	NaN	NaN	NaN	NaN	NaN	NaN	NaN	NaN	NaN	NaN	NaN	NaN	NaN	NaN	NaN	NaN	NaN	NaN	1.3403	NaN	NaN	NaN	NaN	NaN	NaN	NaN	NaN	NaN	NaN	NaN	NaN	NaN	NaN	NaN	NaN	NaN	NaN	NaN	NaN	NaN
0.94535	1.1055	1.1406	0.96393	0.9599	1.0668	0.96823	NaN	NaN	0.79601	0.80446	0.6987	0.51613	0.5027	0.3905	NaN	NaN	NaN	1.3173	1.7121	NaN	1.5277	1.3221	NaN	1.2969	1.3179	1.4359	1.4102	NaN	1.5581	1.1518	0.93695	0.85232	0.60645	0.35646	NaN	1.2675	1.1215	0.98856	1.2125	0.92379	0.89543	0.88401	NaN	0.7897	0.88936	0.83734	0.98748	0.77825	0.67203
NaN	NaN	NaN	NaN	0.73043	NaN	NaN	NaN	0.49172	NaN	NaN	NaN	NaN	NaN	NaN	NaN	NaN	NaN	NaN	NaN	NaN	NaN	NaN	NaN	NaN	NaN	NaN	NaN	NaN	NaN	0.27424	NaN	NaN	NaN	NaN	0.10483	NaN	NaN	NaN	NaN	NaN	NaN	NaN	NaN	NaN	NaN	NaN	NaN	NaN	NaN
NaN	0.79553	0.88032	NaN	NaN	NaN	NaN	NaN	NaN	NaN	NaN	NaN	NaN	NaN	NaN	NaN	NaN	NaN	1.4023	NaN	NaN	NaN	NaN	NaN	NaN	0.92652	NaN	1.091	NaN	NaN	NaN	NaN	NaN	NaN	NaN	NaN	NaN	NaN	NaN	NaN	NaN	NaN	NaN	0.50093	NaN	NaN	NaN	NaN	NaN	NaN
NaN	NaN	NaN	NaN	NaN	0.73913	NaN	0.65959	NaN	NaN	0.46852	NaN	NaN	NaN	NaN	NaN	NaN	NaN	NaN	NaN	NaN	NaN	NaN	1.099	1.0423	NaN	1.1195	NaN	NaN	0.57322	NaN	NaN	NaN	NaN	0.12723	NaN	NaN	NaN	0.86211	0.80547	0.90029	0.75568	NaN	NaN	NaN	0.26332	NaN	NaN	NaN	NaN
NaN	NaN	NaN	NaN	NaN	0.72361	NaN	NaN	NaN	NaN	NaN	NaN	NaN	NaN	NaN	NaN	NaN	NaN	NaN	NaN	NaN	NaN	NaN	NaN	NaN	NaN	NaN	NaN	NaN	NaN	NaN	NaN	NaN	NaN	NaN	NaN	NaN	NaN	NaN	NaN	NaN	NaN	NaN	NaN	NaN	NaN	NaN	NaN	NaN	NaN
NaN	NaN	NaN	NaN	NaN	NaN	NaN	NaN	NaN	NaN	NaN	NaN	NaN	NaN	NaN	NaN	NaN	NaN	NaN	NaN	NaN	NaN	NaN	NaN	NaN	NaN	NaN	NaN	NaN	NaN	NaN	NaN	NaN	NaN	NaN	NaN	NaN	NaN	NaN	NaN	NaN	NaN	NaN	NaN	NaN	NaN	NaN	NaN	NaN	NaN
NaN	NaN	NaN	0.61768	0.76393	0.69761	NaN	NaN	NaN	NaN	NaN	NaN	NaN	NaN	NaN	NaN	NaN	NaN	NaN	NaN	1.4829	NaN	NaN	NaN	NaN	NaN	NaN	NaN	NaN	NaN	NaN	NaN	NaN	NaN	NaN	NaN	NaN	NaN	0.97344	0.74982	0.90049	0.74259	NaN	NaN	NaN	NaN	NaN	NaN	NaN	NaN
1.027	1.0263	0.81597	0.69254	0.77703	0.72332	0.62398	0.59692	0.42008	0.34445	0.29141	0.10499	0.044241	0.057198	0.051903	0.036764	0.07229	NaN	1.2664	1.5195	1.2773	1.3219	1.3805	1.29	1.2398	1.3465	1.1172	1.1357	1.0588	0.48728	NaN	0.13299	0.11967	0.10766	0.11493	0.093499	1.0184	1.0764	0.90818	0.87416	0.82166	0.78813	0.82281	0.62843	0.41981	0.33791	0.36815	0.1378	0.095724	0.097192
NaN	NaN	NaN	NaN	NaN	NaN	NaN	NaN	NaN	NaN	NaN	NaN	NaN	NaN	NaN	NaN	NaN	NaN	NaN	NaN	NaN	NaN	NaN	NaN	NaN	NaN	NaN	NaN	NaN	NaN	NaN	NaN	NaN	NaN	NaN	NaN	NaN	NaN	NaN	NaN	NaN	NaN	NaN	NaN	NaN	NaN	NaN	NaN	NaN	NaN
NaN	NaN	NaN	NaN	NaN	NaN	NaN	NaN	NaN	NaN	NaN	NaN	NaN	NaN	NaN	NaN	NaN	NaN	NaN	NaN	NaN	NaN	NaN	NaN	NaN	NaN	NaN	NaN	NaN	NaN	NaN	NaN	NaN	NaN	NaN	NaN	NaN	NaN	NaN	NaN	NaN	NaN	NaN	NaN	NaN	NaN	NaN	NaN	NaN	NaN
NaN	NaN	NaN	0.82769	1.2348	1.0883	0.7608	1.0282	0.93556	0.97095	1.3165	NaN	1.0149	NaN	NaN	NaN	NaN	0.7502	NaN	1.9128	NaN	NaN	NaN	2.0672	NaN	1.8308	2.2671	NaN	1.4476	NaN	NaN	NaN	NaN	NaN	NaN	NaN	NaN	1.2211	0.98844	1.2669	1.1489	1.4583	1.0643	1.193	NaN	1.1208	1.4278	NaN	NaN	NaN
1.0186	3.153	0.96766	1.2699	1.2128	2.0882	1.3993	1.3673	1.2699	1.7616	1.6362	1.3523	1.9535	0.9787	3.7626	2.7045	5.5329	3.0024	1.5386	2.0644	1.218	2.0488	NaN	2.1532	1.4925	2.0087	2.2996	2.1962	2.1428	2.3601	1.6811	1.7793	2.4354	1.7215	1.8535	2.307	1.4028	1.802	2.0131	1.1111	1.2446	1.8842	1.6773	1.4093	1.5377	1.8176	1.1203	1.4078	1.6576	2.6584
NaN	NaN	NaN	NaN	NaN	NaN	NaN	NaN	NaN	NaN	NaN	NaN	NaN	NaN	NaN	NaN	NaN	NaN	0.93375	2.947	0.74304	1.3145	NaN	2.963	NaN	NaN	NaN	2.6771	2.5547	2.4972	2.9842	NaN	1.9828	NaN	NaN	NaN	NaN	3.7251	NaN	1.3864	1.9586	2.459	1.3834	NaN	2.4742	2.5828	NaN	NaN	NaN	2.8646
1.0356	0.80226	0.90822	0.60207	0.76728	0.73718	0.56286	0.6796	0.57354	NaN	0.7355	0.7937	0.70255	0.74402	0.64987	0.55475	1.0241	0.67939	1.3107	0.9583	1.2531	1.0956	NaN	0.91327	0.97591	0.89291	0.97696	1.1581	1.1825	1.4342	1.2073	0.98394	1.1049	1.1114	1.3275	0.92754	1.017	0.88482	0.81822	0.60132	0.77044	0.63139	0.73128	0.60466	NaN	NaN	1.0725	NaN	0.94667	0.85687
1.2181	1.3172	0.56011	1.1161	0.9766	0.99473	0.81712	0.91538	1.0504	0.85168	NaN	0.97921	0.79342	0.78812	0.58456	0.37122	0.55789	NaN	1.4529	2.3841	1.0694	0.74515	1.8827	2.3667	1.8391	NaN	2.9835	2.064	1.2578	1.8967	2.046	NaN	1.501	1.278	0.65159	0.79104	1.1031	1.6476	0.97074	1.2099	1.2754	1.3421	1.0253	1.0392	0.78703	0.83956	1.0306	1.2131	1.0761	NaN
0.92366	1.6747	0.74282	1.0102	1.1628	1.1089	0.91341	1.1179	0.7685	0.86583	0.85783	1.2705	NaN	3.6405	3.0526	6.0663	13.889	6.7311	1.4264	1.6934	0.95423	0.75314	1.9044	1.8531	2.484	NaN	1.9334	1.679	1.6954	1.5143	NaN	3.8813	6.2623	9.4244	10.42	19.17	1.0281	NaN	0.63914	0.98217	1.2651	1.2402	0.8269	1.141	0.94497	1.1793	0.81824	NaN	NaN	7.2153
0.98647	0.74882	1.5143	0.50174	0.99701	0.94216	0.9994	0.9225	0.84768	0.78545	0.77481	0.61416	0.88067	0.61782	1.6036	2.433	5.1342	1.9458	1.29	0.78813	1.5415	2.5554	0.92316	0.43427	1.2687	1.0638	1.8594	0.83336	1.6914	0.89507	0.59751	3.1879	1.4416	1.7585	9.0518	2.551	1.2458	0.64162	2.0632	0.90979	0.59167	1.2406	1.6189	1.5799	0.94818	0.63845	0.92361	1.5891	2.6332	4.2684
0.96055	1.6747	0.75765	1.0452	1.0988	1.2915	0.81518	1.1179	0.83074	1.0314	0.85783	1.2705	NaN	NaN	3.0526	4.7484	NaN	NaN	NaN	NaN	NaN	NaN	NaN	NaN	NaN	NaN	1.9334	NaN	NaN	NaN	NaN	NaN	NaN	NaN	NaN	NaN	1.0962	NaN	2.0007	0.94608	0.53305	1.2182	2.3744	1.4628	1.173	NaN	0.76778	NaN	4.269	5.3738
0.85606	1.1556	0.7895	0.86301	0.85332	0.77962	0.74733	0.88673	0.89591	0.72693	0.89627	0.92375	0.8408	0.72295	0.85031	NaN	1.0494	0.42841	1.2416	1.8031	0.98342	0.92937	1.6305	1.8358	1.5514	1.5594	1.6712	1.7526	1.5965	1.9655	1.8201	2.1071	1.748	1.8731	NaN	1.3323	0.90169	0.906	0.71384	0.90725	1.0246	1.1292	0.89381	1.0504	0.93485	0.85043	1.0395	1.2449	1.4621	1.3899
0.9208	0.89812	0.79539	1.0975	0.74075	0.80177	0.90887	NaN	0.75299	0.59801	0.56901	NaN	0.94304	1.666	2.8792	2.7272	5.0322	4.1544	1.3291	1.6999	0.82582	1.0889	1.1659	NaN	NaN	NaN	1.2756	1.2151	NaN	1.6687	1.3298	NaN	4.5593	8.1859	9.0902	7.4516	0.98493	0.94724	0.96712	1.0708	0.64593	1.2704	NaN	2.2424	1.4334	1.3309	NaN	1.5855	2.0714	4.1414
NaN	NaN	NaN	NaN	NaN	NaN	NaN	NaN	NaN	NaN	NaN	NaN	NaN	NaN	NaN	NaN	NaN	NaN	1.6882	NaN	2.055	1.5616	NaN	NaN	1.42	NaN	0.80738	NaN	2.006	NaN	NaN	NaN	NaN	NaN	2.3453	0.86399	NaN	NaN	NaN	NaN	NaN	NaN	NaN	NaN	NaN	NaN	NaN	NaN	NaN	0.5414
1.016	1.0446	1.043	2.2174	1.3396	2.5291	NaN	3.4596	0.66965	1.0138	0.8429	NaN	2.5576	NaN	3.6487	3.1768	NaN	5.8168	1.3023	1.6922	1.9283	1.4581	0.89163	0.9638	5.1464	5.0494	1.9064	7.2532	6.5202	9.2873	3.6126	10.144	5.5227	10.26	9.0759	5.1459	0.74376	NaN	0.72869	1.9893	2.0974	NaN	NaN	2.3974	2.9949	0.45021	0.49256	1.4057	2.5985	2.2138
0.99502	1.1691	0.84757	0.53829	0.85042	2.5291	0.53182	0.63932	0.24419	NaN	0.39648	0.21424	NaN	NaN	3.2795	NaN	NaN	NaN	NaN	1.6922	0.82765	NaN	3.9544	NaN	5.1464	5.0494	4.7471	7.2532	6.5202	9.2873	11.681	10.144	12.629	10.26	9.0759	8.3327	0.99246	1.2036	0.53924	0.73223	2.0974	0.64215	0.47074	0.49016	0.65379	0.45021	0.49256	0.31475	4.005	NaN
0.92725	1.2581	0.92964	0.53829	0.35402	1.5195	1.2192	1.8189	2.3271	1.5687	1.6373	2.2741	2.5836	2.2196	1.2199	3.3109	1.7083	2.3106	0.92748	1.2136	1.2633	1.3769	2.9943	1.2049	0.19292	2.4621	3.86	0.96122	0.83821	9.2873	0.53602	0.27207	12.629	NaN	2.3155	3.5722	1.2456	1.2036	1.8529	1.1902	1.5453	1.7704	1.4102	1.5069	1.7097	1.7571	2.2366	3.0795	2.2342	2.7341
NaN	NaN	NaN	NaN	NaN	NaN	NaN	NaN	NaN	NaN	NaN	NaN	NaN	NaN	NaN	NaN	NaN	NaN	NaN	NaN	NaN	NaN	NaN	NaN	NaN	NaN	NaN	NaN	NaN	NaN	NaN	NaN	NaN	NaN	NaN	NaN	NaN	NaN	NaN	NaN	NaN	NaN	NaN	NaN	NaN	NaN	NaN	NaN	NaN	NaN
0.95119	1.6874	NaN	NaN	1.6186	1.5842	1.1953	1.5948	NaN	1.3053	NaN	NaN	1.8253	NaN	1.6275	NaN	NaN	NaN	1.142	2.0601	NaN	NaN	2.5016	NaN	NaN	2.5963	NaN	2.8117	NaN	NaN	NaN	NaN	NaN	NaN	NaN	NaN	1.0681	NaN	1.0001	NaN	1.7944	NaN	NaN	1.4032	NaN	NaN	1.7501	NaN	NaN	NaN
NaN	NaN	NaN	NaN	NaN	NaN	NaN	NaN	NaN	NaN	NaN	NaN	NaN	NaN	NaN	NaN	NaN	NaN	NaN	NaN	NaN	NaN	NaN	NaN	NaN	NaN	NaN	NaN	NaN	NaN	NaN	NaN	NaN	NaN	NaN	NaN	NaN	NaN	NaN	NaN	NaN	NaN	NaN	NaN	NaN	NaN	NaN	NaN	2.3289	2.3855
NaN	NaN	NaN	NaN	NaN	NaN	NaN	NaN	NaN	NaN	NaN	NaN	NaN	NaN	NaN	NaN	NaN	NaN	NaN	NaN	NaN	NaN	NaN	NaN	NaN	NaN	NaN	NaN	NaN	NaN	NaN	NaN	NaN	NaN	NaN	NaN	NaN	NaN	NaN	NaN	NaN	NaN	NaN	NaN	NaN	NaN	NaN	NaN	NaN	NaN
NaN	NaN	NaN	NaN	NaN	NaN	NaN	NaN	NaN	NaN	NaN	NaN	NaN	NaN	NaN	NaN	NaN	NaN	NaN	NaN	NaN	NaN	NaN	NaN	NaN	NaN	NaN	NaN	NaN	NaN	NaN	NaN	NaN	NaN	NaN	NaN	NaN	NaN	NaN	NaN	NaN	NaN	NaN	NaN	NaN	NaN	NaN	NaN	NaN	NaN
NaN	1.6361	NaN	NaN	1.4296	NaN	NaN	NaN	NaN	NaN	NaN	NaN	NaN	NaN	NaN	NaN	NaN	NaN	NaN	2.8024	NaN	0.95099	NaN	1.5152	NaN	2.148	2.435	2.2944	1.8339	NaN	NaN	2.4334	2.5715	NaN	1.8969	NaN	NaN	NaN	NaN	NaN	NaN	NaN	NaN	1.8946	NaN	1.7567	NaN	NaN	1.9665	2.061
NaN	NaN	NaN	NaN	NaN	NaN	NaN	NaN	NaN	NaN	NaN	NaN	NaN	NaN	NaN	NaN	NaN	NaN	NaN	2.8024	NaN	0.95099	NaN	1.5152	NaN	2.148	NaN	NaN	NaN	NaN	NaN	2.5814	NaN	NaN	NaN	NaN	NaN	NaN	NaN	NaN	NaN	NaN	NaN	NaN	NaN	NaN	NaN	NaN	NaN	NaN
NaN	NaN	0.77546	NaN	NaN	NaN	NaN	NaN	NaN	0.62636	NaN	0.64157	NaN	NaN	NaN	NaN	0.82424	0.14711	1.1655	1.3357	1.4722	1.4058	1.3173	1.3661	1.3612	NaN	1.459	1.1523	1.2398	1.6026	1.0815	1.1474	NaN	NaN	1.2793	NaN	0.86927	1.3758	0.90771	NaN	0.83558	NaN	0.9402	NaN	NaN	0.55103	NaN	NaN	NaN	NaN
1.4115	1.4765	0.75815	1.2344	0.24219	0.57286	0.59062	0.84452	1.2794	0.64633	NaN	NaN	NaN	1.1226	0.4114	0.50698	0.42375	NaN	1.4096	3.4601	NaN	3.0273	2.2947	4.8805	NaN	NaN	NaN	NaN	NaN	3.4911	NaN	NaN	NaN	NaN	NaN	2.6478	0.92233	NaN	1.8401	1.6983	0.31851	2.1903	NaN	2.1774	NaN	1.2284	0.98373	1.4452	NaN	2.5205
1.4115	1.4765	0.96092	2.6193	NaN	NaN	NaN	NaN	NaN	NaN	NaN	NaN	NaN	NaN	NaN	NaN	NaN	NaN	NaN	NaN	NaN	NaN	NaN	NaN	NaN	NaN	NaN	NaN	NaN	NaN	NaN	NaN	NaN	NaN	NaN	NaN	NaN	NaN	NaN	NaN	NaN	NaN	NaN	NaN	NaN	NaN	NaN	NaN	NaN	NaN
0.98973	0.5488	0.24576	0.20699	0.073236	0.071651	NaN	0.026231	NaN	NaN	NaN	NaN	NaN	NaN	NaN	NaN	NaN	NaN	NaN	2.2395	0.45226	0.35791	0.53687	NaN	0.29442	0.2303	NaN	0.15724	NaN	NaN	NaN	NaN	NaN	NaN	NaN	NaN	NaN	NaN	NaN	NaN	NaN	NaN	NaN	NaN	NaN	NaN	NaN	NaN	NaN	NaN
0.98973	0.5488	0.24576	0.20699	0.073236	0.071651	NaN	0.026231	NaN	NaN	NaN	NaN	NaN	NaN	NaN	NaN	NaN	NaN	NaN	2.2395	0.45226	0.35791	0.53687	NaN	0.29442	0.2303	NaN	0.15724	NaN	NaN	NaN	NaN	NaN	NaN	NaN	NaN	NaN	NaN	NaN	NaN	NaN	NaN	NaN	NaN	NaN	NaN	NaN	NaN	NaN	NaN
NaN	NaN	NaN	NaN	NaN	NaN	NaN	NaN	NaN	NaN	NaN	NaN	NaN	NaN	NaN	NaN	NaN	NaN	NaN	15.048	NaN	NaN	NaN	NaN	NaN	NaN	NaN	NaN	NaN	NaN	NaN	NaN	NaN	NaN	NaN	NaN	NaN	NaN	NaN	NaN	NaN	NaN	NaN	NaN	NaN	NaN	NaN	NaN	NaN	NaN
NaN	NaN	NaN	NaN	NaN	NaN	NaN	NaN	NaN	NaN	NaN	NaN	NaN	NaN	NaN	NaN	NaN	NaN	NaN	1.8488	NaN	1.4691	NaN	8.9964	0.88462	NaN	2.4495	1.5233	0.65897	NaN	NaN	3.0185	1.9796	3.4464	NaN	NaN	NaN	NaN	NaN	NaN	NaN	NaN	NaN	NaN	NaN	NaN	NaN	NaN	NaN	NaN
0.90303	NaN	NaN	NaN	NaN	1.1157	NaN	NaN	NaN	NaN	NaN	1.075	NaN	NaN	NaN	NaN	1.2652	NaN	NaN	NaN	NaN	NaN	1.8595	NaN	NaN	NaN	NaN	NaN	NaN	NaN	NaN	NaN	NaN	NaN	NaN	1.8288	NaN	NaN	1.1319	1.4984	1.0112	1.2963	NaN	1.0718	NaN	1.4404	1.3684	1.972	1.6036	1.4383
0.94933	1.2873	0.9971	0.88409	1.115	1.1424	0.8955	1.1064	0.88718	0.94274	0.92752	1.003	1.0548	1.0834	1.0032	0.63025	1.4216	1.1634	1.3229	2.1462	1.3699	1.5132	2.2439	1.9902	1.6177	1.5445	2.1507	2.2367	1.6452	1.4588	2.6984	2.094	1.8349	1.7565	1.5984	1.7893	1.0088	1.8961	1.2657	1.2923	1.2314	1.9695	0.97858	1.1401	1.3596	1.0738	1.2883	2.333	2.0406	1.5052
0.99423	0.9284	0.88664	0.77849	1.006	0.92886	0.92181	0.88644	0.88576	0.737	0.95981	0.92013	0.74127	0.89647	0.79669	0.51582	0.83906	0.28996	1.4722	1.5109	1.5523	1.382	1.6354	1.6561	1.9264	1.6096	1.5731	1.7578	1.5431	1.5789	1.497	1.5761	1.4655	1.4902	1.2517	1.0102	1.0536	NaN	1.2117	1.0509	1.0526	1.1939	0.96755	0.95401	0.83467	0.98493	1.0531	1.1944	1.0615	1.0886
NaN	1.1081	0.97146	NaN	NaN	NaN	NaN	0.60572	NaN	NaN	0.83556	NaN	0.74944	NaN	NaN	NaN	1.1288	NaN	NaN	NaN	NaN	1.3053	1.1875	1.6756	NaN	1.6329	NaN	NaN	NaN	NaN	NaN	1.7651	1.4553	NaN	1.5678	1.4512	NaN	NaN	NaN	NaN	NaN	1.1602	NaN	NaN	NaN	0.9063	NaN	NaN	NaN	NaN
NaN	NaN	NaN	NaN	NaN	NaN	NaN	NaN	NaN	NaN	NaN	NaN	NaN	NaN	NaN	NaN	NaN	NaN	NaN	NaN	NaN	NaN	NaN	NaN	NaN	NaN	NaN	NaN	NaN	NaN	NaN	NaN	NaN	NaN	NaN	NaN	NaN	NaN	2.4975	NaN	NaN	NaN	NaN	NaN	NaN	NaN	NaN	NaN	NaN	NaN
0.85378	1.8775	1.8128	NaN	NaN	NaN	0.56076	NaN	NaN	NaN	0.31142	NaN	0.038423	NaN	0.49606	0.2282	NaN	NaN	1.3174	2.478	2.1821	5.1045	NaN	NaN	0.56768	0.25178	NaN	0.43732	2.3911	NaN	NaN	NaN	0.30234	NaN	2.6832	NaN	1.0678	1.328	1.3214	1.3732	NaN	NaN	1.377	0.59403	NaN	NaN	0.34903	NaN	NaN	NaN
NaN	NaN	NaN	NaN	NaN	NaN	NaN	NaN	NaN	NaN	NaN	NaN	NaN	NaN	NaN	NaN	NaN	NaN	NaN	NaN	NaN	NaN	NaN	NaN	NaN	NaN	NaN	NaN	NaN	NaN	NaN	NaN	NaN	NaN	NaN	NaN	NaN	NaN	NaN	NaN	NaN	NaN	NaN	NaN	NaN	NaN	NaN	NaN	NaN	NaN
NaN	NaN	NaN	NaN	NaN	NaN	NaN	NaN	2.7417	1.3923	1.0531	NaN	1.0411	0.94968	NaN	NaN	NaN	NaN	NaN	NaN	NaN	NaN	NaN	NaN	NaN	NaN	NaN	NaN	NaN	NaN	NaN	NaN	NaN	NaN	NaN	NaN	NaN	NaN	NaN	NaN	NaN	NaN	NaN	NaN	NaN	NaN	NaN	2.0114	NaN	NaN
NaN	NaN	NaN	NaN	NaN	NaN	NaN	NaN	NaN	NaN	NaN	NaN	NaN	0.94968	NaN	NaN	NaN	NaN	NaN	NaN	NaN	NaN	NaN	NaN	NaN	NaN	NaN	NaN	NaN	NaN	NaN	NaN	NaN	NaN	NaN	NaN	NaN	NaN	NaN	NaN	NaN	NaN	NaN	NaN	NaN	NaN	NaN	2.0114	NaN	NaN
1.0476	1.3154	0.71009	0.87393	0.85134	1.0057	0.74306	0.9052	0.92022	0.80523	0.8771	0.74415	0.61246	0.64531	NaN	0.40527	NaN	0.32114	1.1111	2.0532	0.80764	0.76159	2.2812	2.2945	1.9828	1.8977	1.8331	1.5635	0.97495	1.5262	1.5937	1.2403	NaN	1.5509	NaN	NaN	0.979	1.3167	0.61455	0.91524	1.1707	1.1354	0.76327	0.95885	0.93541	0.83124	1.1385	1.1893	1.0104	0.94982
NaN	NaN	NaN	NaN	NaN	NaN	NaN	NaN	NaN	NaN	NaN	NaN	NaN	NaN	NaN	NaN	NaN	NaN	NaN	NaN	NaN	NaN	NaN	NaN	NaN	NaN	NaN	NaN	NaN	NaN	NaN	NaN	0.46364	NaN	NaN	NaN	0.85992	NaN	NaN	NaN	NaN	NaN	NaN	NaN	NaN	NaN	NaN	NaN	NaN	NaN
0.83397	0.73503	0.66617	0.57225	0.7258	0.62164	0.64454	0.66423	0.48568	0.61046	0.66459	0.7666	0.68178	0.62806	0.72531	0.53194	0.88761	0.49161	1.1889	0.75493	1.1586	1.0233	1.1403	0.79128	0.93627	1.2313	0.91763	1.0825	1.1985	1.3101	1.3164	0.87267	0.9237	1.0663	1.2375	0.88258	0.82705	0.82269	0.74159	0.74982	0.72783	0.59998	0.68479	0.62775	0.70068	0.71818	0.93208	0.88935	0.89191	0.88602
NaN	NaN	NaN	NaN	NaN	NaN	NaN	1.2514	NaN	0.95088	NaN	NaN	0.80444	NaN	0.76082	0.58878	NaN	NaN	NaN	NaN	NaN	NaN	NaN	NaN	NaN	NaN	NaN	NaN	NaN	NaN	2.0247	NaN	1.7242	NaN	NaN	NaN	NaN	NaN	NaN	NaN	NaN	NaN	NaN	0.98188	NaN	NaN	NaN	NaN	1.5667	NaN
NaN	NaN	NaN	NaN	NaN	NaN	0.79253	NaN	NaN	NaN	NaN	1.0587	NaN	NaN	NaN	NaN	NaN	NaN	NaN	NaN	NaN	NaN	NaN	2.4994	NaN	NaN	NaN	NaN	1.6339	NaN	NaN	NaN	NaN	NaN	NaN	NaN	NaN	NaN	NaN	NaN	NaN	NaN	NaN	NaN	NaN	NaN	NaN	NaN	NaN	NaN
NaN	NaN	NaN	NaN	NaN	NaN	NaN	NaN	NaN	NaN	NaN	NaN	NaN	NaN	NaN	NaN	NaN	NaN	1.6008	NaN	0.99694	NaN	1.9694	NaN	NaN	NaN	1.2284	NaN	NaN	NaN	1.6193	1.2206	1.6942	NaN	NaN	NaN	NaN	NaN	0.71854	1.0126	NaN	1.2358	NaN	NaN	0.73895	0.97593	1.2583	0.83959	1.2496	1.4107
0.55767	1.0406	0.73408	1.0286	0.79689	0.97243	0.71718	0.92675	0.65559	0.61753	0.68889	0.71827	0.65021	0.75241	0.66903	0.41327	NaN	0.69076	1.3437	1.3314	1.2067	1.1584	2.6711	1.173	2.0253	1.1983	NaN	2.0081	1.2523	1.8665	1.4499	1.6548	1.6197	1.1351	1.0567	3.3549	0.88006	0.98114	0.73757	0.94721	1.0237	1.0199	0.87627	0.99725	0.79251	1.1829	0.7297	0.98297	0.7506	1.2961
0.99408	0.58733	0.51577	0.87567	1.0059	0.93415	NaN	1.6466	0.5934	NaN	NaN	2.4987	1.0045	NaN	NaN	NaN	1.4783	NaN	2.0426	NaN	NaN	NaN	1.0119	1.5051	2.0638	NaN	NaN	NaN	NaN	NaN	NaN	NaN	NaN	1.6329	NaN	1.4864	1.0336	1.4575	NaN	NaN	1.5789	1.206	1.0555	0.6327	NaN	1.5099	1.3859	NaN	2.1963	NaN
1.0456	0.89888	NaN	0.69067	NaN	0.84686	NaN	0.71044	0.58244	NaN	NaN	NaN	NaN	0.92166	1.0071	0.84828	NaN	NaN	NaN	1.4722	NaN	NaN	1.5699	NaN	NaN	NaN	NaN	NaN	NaN	NaN	2.2023	NaN	NaN	NaN	1.9134	1.9556	NaN	NaN	NaN	1.0017	NaN	NaN	1.0122	NaN	NaN	NaN	0.89411	1.3146	1.0846	2.0301
NaN	NaN	0.51111	NaN	NaN	NaN	NaN	1.1881	NaN	NaN	NaN	NaN	NaN	NaN	NaN	1.019	NaN	0.75877	0.95284	NaN	1.5694	NaN	NaN	1.1449	1.5806	1.4803	1.6578	1.8818	NaN	1.4389	2.0993	1.5112	1.4331	1.8136	1.213	NaN	NaN	1.0643	0.37387	0.65559	1.3289	1.1107	NaN	0.58132	1.5023	1.4048	0.85471	0.83984	1.4808	1.3173
NaN	NaN	0.72898	NaN	NaN	NaN	NaN	NaN	0.50844	NaN	NaN	0.51139	NaN	0.48047	0.3864	NaN	NaN	NaN	NaN	NaN	NaN	NaN	NaN	NaN	NaN	NaN	1.0657	NaN	NaN	NaN	NaN	NaN	NaN	0.67553	0.44823	NaN	NaN	NaN	NaN	0.81886	NaN	NaN	0.36258	1.0152	0.63602	NaN	0.61274	0.53029	NaN	0.57503
0.88426	1.0655	0.65148	0.65732	0.77537	0.808	0.61835	0.72404	0.56797	0.47967	0.56596	0.46716	0.40355	0.40951	0.30334	0.20907	0.38308	0.15091	1.254	1.6151	1.0092	0.93713	1.7303	1.7167	1.3142	1.477	1.3465	1.3723	1.4696	1.0767	0.87576	0.822	0.77845	0.86432	0.34048	NaN	0.97046	1.2544	0.89854	0.91658	0.97081	1.0375	0.65089	0.85493	0.82177	0.80461	0.81914	0.77603	0.70884	0.63835
0.84577	0.93931	0.6858	0.69997	0.51255	0.84356	0.47944	0.38428	0.3616	0.44699	0.37794	0.32191	0.3324	0.39622	0.35642	0.31693	0.43413	0.35371	1.209	1.386	0.68889	0.90908	1.7	1.2202	0.84589	0.93879	1.1132	1.2729	0.71766	1.06	0.76576	0.82439	0.85917	0.6142	0.67802	0.773	1.0163	0.91527	0.94566	0.79949	1.0388	0.8256	0.78901	0.60233	0.705	0.7952	0.82637	0.59939	0.65322	0.54409
NaN	NaN	NaN	0.73943	NaN	NaN	NaN	NaN	NaN	NaN	NaN	NaN	NaN	NaN	NaN	NaN	NaN	NaN	NaN	NaN	NaN	NaN	NaN	NaN	NaN	NaN	NaN	NaN	NaN	NaN	NaN	NaN	NaN	NaN	NaN	NaN	NaN	NaN	NaN	NaN	NaN	NaN	NaN	NaN	NaN	NaN	NaN	NaN	NaN	NaN
1.0623	0.79563	0.49167	NaN	0.33461	0.50104	0.37634	0.43505	0.59955	0.41106	0.32183	0.28131	0.3306	0.4588	0.37118	0.23184	0.38136	0.15677	NaN	NaN	NaN	NaN	NaN	NaN	NaN	NaN	NaN	NaN	NaN	NaN	NaN	NaN	NaN	NaN	NaN	NaN	NaN	NaN	NaN	NaN	NaN	NaN	NaN	NaN	NaN	NaN	NaN	NaN	NaN	NaN
1.0608	NaN	NaN	1.4797	NaN	1.9403	2.0512	NaN	NaN	3.288	3.3317	3.6567	3.48	3.6531	NaN	1.0558	NaN	0.57449	1.3803	2.6035	NaN	NaN	2.7228	2.621	NaN	2.2818	3.4478	NaN	3.8971	6.8486	6.3619	8.8403	6.6054	NaN	1.9718	1.9615	0.98133	1.6788	1.7253	1.3962	1.4888	2.8654	1.7548	3.039	2.6519	4.7505	5.0922	5.8237	NaN	3.9578
1.0049	0.78855	0.57893	0.81583	0.32418	0.44029	0.36201	0.35818	0.65456	0.31368	0.29215	0.20629	0.24933	0.34632	0.29439	0.20501	0.30233	0.12021	1.2338	3.3647	0.71163	0.765	1.202	1.8435	1.3641	0.84761	0.84009	2.2159	0.9822	2.8803	0.58141	0.81448	0.77011	0.97147	0.54986	0.53176	1.0576	1.1154	1.3071	0.79979	0.50956	0.75992	0.72154	0.95304	0.54581	0.54287	0.97825	0.72272	0.48427	0.56603
NaN	NaN	NaN	NaN	NaN	NaN	NaN	NaN	NaN	NaN	NaN	NaN	NaN	NaN	NaN	NaN	NaN	NaN	NaN	NaN	NaN	NaN	NaN	NaN	NaN	NaN	NaN	1.2653	NaN	NaN	NaN	NaN	NaN	NaN	NaN	0.73134	NaN	NaN	NaN	NaN	NaN	NaN	NaN	NaN	NaN	NaN	NaN	NaN	NaN	NaN
NaN	NaN	NaN	0.75637	NaN	0.60406	1.1526	NaN	1.0252	0.40346	NaN	NaN	NaN	NaN	NaN	NaN	NaN	0.60602	1.2646	1.7885	1.8799	NaN	1.5966	2.7473	NaN	NaN	NaN	NaN	0.91261	0.71729	NaN	NaN	1.2985	1.3536	0.82503	1.2994	1.0549	2.2775	NaN	1.0685	1.3868	NaN	1.6843	NaN	1.2273	1.2302	NaN	0.75633	1.1066	1.378
NaN	1.5052	1.0429	0.75637	NaN	1.1797	NaN	NaN	NaN	1.2969	0.87802	NaN	NaN	NaN	NaN	NaN	NaN	0.60602	NaN	NaN	NaN	1.6422	NaN	NaN	NaN	NaN	NaN	1.7304	1.3763	0.71729	NaN	NaN	1.1839	NaN	0.82503	1.2994	1.0469	1.4903	NaN	1.4033	NaN	1.5352	0.59046	1.2234	1.2854	1.2302	NaN	1.0846	1.1066	1.378
0.91802	1.1725	1.0691	0.97238	NaN	1.1351	1.3763	1.2328	1.0763	NaN	NaN	0.84421	NaN	0.63471	NaN	0.38807	0.57725	NaN	NaN	2.0292	1.4702	1.3021	2.5472	1.4423	NaN	NaN	1.3392	1.7831	1.1653	1.5905	NaN	1.2402	NaN	1.0333	0.73269	NaN	0.99261	1.7682	1.2757	1.4577	1.3474	1.5872	1.3324	NaN	1.2523	1.2818	1.0079	NaN	0.90818	1.2287
NaN	NaN	NaN	NaN	NaN	NaN	NaN	NaN	NaN	NaN	NaN	NaN	NaN	NaN	NaN	NaN	NaN	NaN	NaN	NaN	1.5261	NaN	NaN	NaN	NaN	NaN	NaN	NaN	NaN	NaN	1.6492	NaN	NaN	NaN	NaN	NaN	NaN	NaN	NaN	NaN	NaN	NaN	NaN	NaN	NaN	NaN	0.96132	NaN	NaN	NaN
NaN	NaN	NaN	NaN	NaN	NaN	NaN	NaN	NaN	NaN	NaN	NaN	NaN	NaN	NaN	NaN	NaN	NaN	NaN	NaN	NaN	NaN	NaN	NaN	NaN	NaN	NaN	NaN	NaN	NaN	NaN	NaN	NaN	NaN	NaN	NaN	NaN	NaN	NaN	NaN	NaN	NaN	NaN	NaN	NaN	NaN	NaN	NaN	NaN	NaN
NaN	NaN	NaN	0.60558	NaN	NaN	0.6761	1.3797	0.9476	1.133	1.4316	0.90377	1.546	NaN	0.87129	NaN	1.1555	0.65778	NaN	1.0571	NaN	NaN	NaN	1.8802	1.898	1.9434	2.0749	2.1506	1.9217	NaN	1.8889	2.4043	2.3698	1.9186	1.0411	2.2719	0.84652	NaN	1.2333	1.0314	0.91294	1.2079	1.2881	1.2007	1.2723	1.2285	1.5449	1.364	1.7058	1.527
1.0801	1.316	0.74815	0.95337	1.0496	1.0141	0.84107	1.198	1.013	1.0274	0.96752	1.0243	1.0683	0.93064	0.90531	0.73923	1.0747	0.5023	1.459	2.0272	1.0915	0.81569	3.0579	2.2824	2.1443	2.1504	2.1789	2.1817	1.9954	1.9315	2.5951	2.3878	2.1384	2.1876	1.3526	1.9761	1.0181	1.657	0.71222	1.0726	1.254	1.3363	0.99817	1.1609	1.2118	NaN	1.4545	1.5856	1.5851	1.6986
0.77615	1.5713	0.6928	1.0299	0.75515	0.82528	0.66559	1.1471	1.1187	1.0222	0.61948	NaN	0.8635	0.75357	0.38556	NaN	1.0834	NaN	1.3098	NaN	0.86785	0.82119	NaN	2.5517	1.9668	2.1664	2.6214	NaN	1.4335	1.7649	NaN	NaN	1.4729	1.1152	NaN	1.5175	0.95625	NaN	NaN	NaN	1.1856	NaN	0.91351	NaN	1.1676	0.99943	1.4428	NaN	NaN	NaN
NaN	NaN	NaN	NaN	NaN	NaN	NaN	NaN	NaN	NaN	NaN	NaN	NaN	NaN	NaN	NaN	NaN	NaN	NaN	NaN	NaN	NaN	NaN	NaN	NaN	NaN	NaN	NaN	NaN	NaN	NaN	NaN	NaN	NaN	NaN	NaN	NaN	NaN	NaN	NaN	NaN	NaN	NaN	NaN	NaN	NaN	NaN	NaN	NaN	NaN
NaN	0.80812	0.35238	NaN	NaN	NaN	NaN	NaN	NaN	NaN	NaN	NaN	NaN	NaN	NaN	NaN	NaN	NaN	1.0905	1.1183	0.97238	0.88734	NaN	0.45854	NaN	NaN	NaN	NaN	NaN	NaN	NaN	NaN	NaN	NaN	NaN	NaN	NaN	NaN	NaN	NaN	NaN	NaN	NaN	NaN	NaN	NaN	NaN	NaN	NaN	NaN
0.92795	0.84801	0.43378	0.50409	0.41257	NaN	0.20282	NaN	NaN	NaN	NaN	NaN	NaN	NaN	NaN	NaN	NaN	NaN	1.5228	1.6277	0.61755	0.51248	0.65603	0.90851	0.62293	0.63555	NaN	0.22102	NaN	NaN	NaN	NaN	NaN	NaN	NaN	NaN	1.0441	0.90214	0.46306	NaN	0.59995	4.3485	NaN	0.20729	NaN	NaN	NaN	NaN	NaN	NaN
NaN	NaN	NaN	NaN	NaN	NaN	NaN	NaN	NaN	NaN	NaN	NaN	NaN	NaN	NaN	NaN	NaN	NaN	NaN	NaN	NaN	NaN	NaN	NaN	NaN	NaN	NaN	NaN	NaN	NaN	NaN	NaN	NaN	NaN	NaN	NaN	NaN	NaN	NaN	NaN	NaN	NaN	NaN	NaN	NaN	NaN	NaN	NaN	NaN	NaN
NaN	NaN	NaN	NaN	NaN	NaN	NaN	NaN	NaN	NaN	NaN	NaN	NaN	NaN	NaN	NaN	NaN	NaN	NaN	NaN	NaN	NaN	NaN	NaN	NaN	NaN	NaN	NaN	NaN	NaN	NaN	NaN	NaN	NaN	NaN	NaN	NaN	NaN	NaN	NaN	NaN	NaN	NaN	NaN	NaN	NaN	NaN	NaN	NaN	NaN
NaN	NaN	NaN	NaN	NaN	NaN	NaN	NaN	NaN	NaN	NaN	NaN	NaN	NaN	NaN	NaN	NaN	NaN	0.84987	NaN	NaN	NaN	NaN	1.6501	0.629	NaN	0.83501	1.3522	1.2304	1.6068	NaN	1.5306	1.597	1.9509	0.99667	1.9379	1.1102	NaN	0.77608	NaN	0.8099	NaN	NaN	0.72664	NaN	1.2035	1.8946	NaN	1.3819	1.0649
NaN	1.0435	NaN	0.80912	0.5634	1.1756	0.85458	0.9617	1.0206	0.75799	0.73949	NaN	0.97866	1.2251	0.87699	0.82211	1.1699	0.48952	0.86904	1.9403	0.73026	NaN	1.2543	1.7868	1.5507	1.5504	1.9254	2.4842	1.5097	2.4277	1.8492	1.9743	2.174	2.2884	1.0121	2.219	0.65851	NaN	NaN	NaN	NaN	NaN	NaN	1.126	NaN	1.3635	NaN	2.1599	1.5899	1.3768
0.89844	1.4718	1.4533	1.2354	1.5318	1.4313	1.3322	1.5082	1.1782	1.2062	1.2343	1.2643	1.3482	1.2769	1.2757	1.0845	2.0212	1.184	1.3424	2.3239	1.9945	1.9937	2.1112	2.1266	2.364	2.1007	1.9735	2.1315	2.1177	2.2122	2.2339	2.3586	2.3386	1.8844	2.4879	1.8699	0.98749	1.7354	1.7404	1.43	1.433	1.3897	1.5891	1.962	1.6511	1.7715	1.3306	1.462	1.6357	1.6376
0.92157	1.2945	1.1564	0.60254	1.1778	1.1132	0.98756	1.1659	0.50541	0.89728	1.0068	1.0902	1.1547	1.0063	1.0764	0.74175	1.5366	0.81912	1.2299	0.91655	1.525	1.3545	1.6147	1.3032	1.8019	1.6208	1.6299	1.6377	1.7214	1.709	1.9339	1.5626	1.5545	1.7272	1.7775	1.5631	0.99315	1.3402	1.2232	1.0546	1.1106	1.1094	1.1538	0.65355	0.96118	1.0661	1.2324	1.4132	1.3882	1.4023
NaN	NaN	NaN	NaN	NaN	NaN	NaN	NaN	NaN	NaN	NaN	NaN	NaN	NaN	NaN	0.3366	NaN	NaN	NaN	NaN	NaN	NaN	NaN	NaN	NaN	NaN	NaN	NaN	NaN	NaN	NaN	NaN	NaN	NaN	0.81236	NaN	NaN	NaN	NaN	0.76199	NaN	NaN	NaN	NaN	NaN	NaN	NaN	NaN	NaN	NaN
0.93029	0.92013	0.75899	0.52774	0.74709	0.77676	0.71762	0.74744	0.60143	0.58484	0.6518	0.64243	0.57924	0.58687	0.50895	0.3366	0.5692	0.22731	1.1303	0.74659	1.1412	1.1268	1.3793	1.1423	1.2431	1.2616	1.2553	1.2865	1.3225	1.4215	1.0851	1.0803	0.90709	0.93972	0.75213	0.67805	0.9267	0.94821	0.83416	0.76199	0.82607	0.81843	0.81813	0.65259	0.68967	0.6972	0.86154	0.85323	0.81863	0.79705
0.84117	0.6603	0.44704	0.24962	0.23331	0.18296	0.13711	0.14124	0.097981	0.087213	0.082288	0.085072	0.06493	0.058092	0.040994	NaN	0.027763	0.020565	1.0884	1.1157	0.76476	0.7401	0.77925	0.32937	0.61974	0.51429	0.45163	0.35426	0.30245	0.21202	0.17384	0.15149	0.12247	0.098615	0.11074	0.084031	0.75519	0.84756	0.3288	0.10726	0.31372	0.12316	0.10433	0.10494	0.07965	0.11547	0.065451	0.05804	0.081677	0.056087
0.91885	0.48572	0.20198	0.068521	0.056524	0.039591	NaN	0.032781	0.023967	0.027627	0.021546	0.023433	NaN	0.017131	0.011494	NaN	NaN	NaN	1.1224	1.0806	0.80471	0.418	0.34248	0.17819	0.12913	0.12212	0.094577	0.059679	0.057094	0.049335	NaN	0.034831	0.032629	0.025672	0.018729	NaN	0.84189	0.52982	NaN	NaN	0.068235	NaN	NaN	NaN	NaN	NaN	NaN	NaN	0.028985	NaN
0.80589	0.3208	0.49065	NaN	0.12298	NaN	0.079944	NaN	NaN	NaN	NaN	NaN	NaN	NaN	NaN	NaN	NaN	NaN	1.1579	0.39366	1.4338	1.3441	0.26565	0.1332	0.28116	0.17428	0.10989	0.09551	0.18194	0.12424	0.055224	0.046386	0.031625	0.017844	0.059488	0.021973	0.80243	0.34437	0.51003	0.25356	NaN	0.13039	0.31073	0.11506	NaN	NaN	NaN	NaN	NaN	NaN
1.0419	1.0337	0.84254	0.68532	0.63807	0.73473	0.67537	0.68955	0.54993	0.51951	0.52184	0.32652	0.31181	0.28981	0.19806	0.11598	0.17027	0.036061	1.3449	1.445	0.93775	1.3845	1.3535	1.4493	1.3578	1.3968	1.3088	1.1844	1.2027	1.0378	0.78612	0.59894	0.53049	0.41498	0.29996	0.24136	1.0911	0.80041	0.92781	0.8091	0.69604	0.76131	0.81607	0.70281	0.60368	0.53179	0.53422	0.37127	0.40158	0.39037
NaN	NaN	NaN	NaN	NaN	NaN	NaN	NaN	NaN	NaN	NaN	NaN	NaN	NaN	NaN	NaN	NaN	NaN	NaN	NaN	NaN	NaN	NaN	NaN	NaN	NaN	NaN	NaN	NaN	NaN	NaN	NaN	NaN	NaN	1.5335	NaN	NaN	NaN	NaN	NaN	NaN	NaN	NaN	NaN	NaN	NaN	NaN	NaN	NaN	NaN
NaN	NaN	NaN	NaN	NaN	NaN	NaN	NaN	NaN	NaN	NaN	NaN	NaN	NaN	NaN	NaN	NaN	NaN	NaN	NaN	NaN	NaN	NaN	NaN	NaN	NaN	NaN	NaN	NaN	NaN	NaN	NaN	NaN	NaN	NaN	NaN	1.021	0.81391	1.0462	1.2345	1.2549	NaN	0.86176	1.0705	1.0515	1.2278	1.3229	1.3447	1.8629	1.7335
NaN	NaN	0.92883	0.40516	1.2373	0.84942	0.63151	NaN	NaN	0.49564	0.91983	1.3644	NaN	NaN	0.47158	NaN	0.6014	NaN	1.3393	NaN	1.6479	0.65172	NaN	0.71232	0.95062	1.5846	0.93719	0.80325	0.97831	0.97615	1.1477	NaN	NaN	0.39752	0.35062	NaN	1.032	0.5764	0.53472	0.525	1.3074	0.39119	0.45791	NaN	0.41538	0.40332	0.77164	0.79774	0.32037	NaN
NaN	1.1439	0.89247	NaN	0.96594	NaN	NaN	0.83099	0.2639	0.62839	NaN	NaN	0.43176	NaN	NaN	NaN	NaN	0.056874	NaN	NaN	1.5692	1.462	NaN	1.7015	NaN	1.5699	NaN	NaN	NaN	NaN	NaN	0.71394	NaN	NaN	NaN	0.15952	NaN	NaN	0.86897	NaN	1.0217	1.0054	0.97088	0.89422	0.68283	NaN	NaN	NaN	NaN	0.41834
NaN	NaN	NaN	NaN	NaN	NaN	NaN	NaN	NaN	NaN	NaN	NaN	NaN	NaN	NaN	NaN	NaN	NaN	1.0969	NaN	1.7908	NaN	NaN	NaN	0.77677	NaN	0.727	0.80325	NaN	0.69188	0.94442	NaN	NaN	NaN	NaN	NaN	NaN	NaN	NaN	NaN	NaN	NaN	NaN	NaN	NaN	NaN	NaN	NaN	NaN	NaN
NaN	NaN	1.1211	NaN	NaN	0.79863	NaN	NaN	NaN	NaN	NaN	NaN	NaN	NaN	NaN	NaN	NaN	NaN	NaN	NaN	NaN	NaN	NaN	NaN	NaN	NaN	NaN	1.3945	NaN	NaN	NaN	NaN	NaN	NaN	NaN	NaN	NaN	NaN	NaN	NaN	NaN	NaN	NaN	NaN	NaN	NaN	NaN	NaN	NaN	NaN
NaN	1.2046	NaN	NaN	NaN	NaN	NaN	NaN	NaN	NaN	NaN	NaN	NaN	NaN	NaN	NaN	NaN	NaN	NaN	NaN	NaN	NaN	NaN	NaN	NaN	NaN	NaN	NaN	NaN	NaN	NaN	NaN	NaN	NaN	NaN	NaN	NaN	NaN	NaN	NaN	NaN	NaN	NaN	NaN	NaN	NaN	NaN	NaN	NaN	NaN
NaN	NaN	NaN	NaN	NaN	0.87593	NaN	NaN	0.64213	NaN	NaN	NaN	NaN	NaN	0.58815	NaN	1.3335	0.25622	NaN	NaN	NaN	1.3779	1.3435	NaN	NaN	1.4685	1.3172	NaN	NaN	NaN	NaN	NaN	NaN	NaN	NaN	NaN	NaN	NaN	NaN	NaN	NaN	NaN	NaN	0.84464	NaN	NaN	NaN	NaN	0.95301	NaN
0.88829	0.95358	0.6384	1.2553	0.60519	0.77116	0.63797	0.75903	1.5236	0.75749	0.56932	0.56485	NaN	0.8436	0.62275	0.31795	NaN	0.27516	1.3462	3.9443	0.91975	0.68681	NaN	2.9553	1.1028	NaN	1.4113	1.685	1.2091	1.9831	1.2797	2.2401	2.1025	1.7651	NaN	NaN	1.1397	1.6786	1.3549	1.0403	0.72182	1.4685	1.0349	1.9895	NaN	NaN	NaN	NaN	NaN	NaN
NaN	NaN	NaN	NaN	NaN	NaN	0.83372	0.89024	NaN	NaN	NaN	NaN	0.71117	NaN	NaN	NaN	0.66625	0.27516	NaN	2.831	NaN	NaN	NaN	NaN	NaN	NaN	1.4113	NaN	NaN	NaN	NaN	NaN	NaN	NaN	NaN	NaN	NaN	NaN	NaN	NaN	NaN	NaN	NaN	NaN	NaN	NaN	NaN	NaN	NaN	NaN
NaN	NaN	NaN	1.3543	NaN	0.86276	0.70344	NaN	NaN	NaN	NaN	NaN	NaN	NaN	NaN	NaN	NaN	NaN	1.0832	3.3416	1.2678	1.2922	NaN	NaN	1.3591	1.3125	1.0578	1.3077	1.3367	1.1556	NaN	3.1154	0.46427	NaN	NaN	NaN	NaN	NaN	NaN	NaN	NaN	NaN	NaN	NaN	NaN	NaN	NaN	NaN	NaN	NaN
0.99194	0.95358	0.6384	1.2294	0.60519	0.84004	0.70154	0.85645	1.4353	0.92103	0.68642	0.64486	0.88352	1.2995	0.99205	0.66325	1.0837	0.25622	1.2496	3.9144	0.83213	0.68681	2.2741	NaN	1.2297	1.4866	1.5693	1.5187	1.774	1.9831	1.6006	2.2401	2.7751	2.9368	NaN	NaN	1.1397	1.4411	1.3271	1.1056	0.76913	1.2133	1.0349	1.8562	1.0669	0.99212	0.90002	2.1278	1.5455	NaN
NaN	1.1066	0.95778	0.65802	0.92993	0.87151	NaN	NaN	0.51217	0.58884	0.88205	NaN	0.73568	NaN	NaN	0.38344	NaN	NaN	NaN	NaN	1.5857	1.408	1.6297	NaN	NaN	1.5554	NaN	NaN	NaN	1.4973	NaN	1.298	NaN	NaN	NaN	NaN	NaN	1.1433	NaN	NaN	1.0664	NaN	NaN	NaN	NaN	0.89776	NaN	NaN	NaN	NaN
0.9265	1.0658	1.2369	1.0667	0.94455	1.1652	1.0659	1.0579	0.95582	0.95933	0.9116	1.059	1.0369	1.103	0.956	0.92757	1.1345	0.48364	1.458	2.2054	2.048	2.0946	2.2618	2.337	2.1485	2.0057	1.8642	2.4001	2.3759	2.5472	2.0216	2.2992	2.3106	2.338	2.5418	1.8304	0.9937	1.711	1.3241	1.6517	1.0581	1.3656	1.4179	1.2839	1.3414	1.3246	1.514	1.6817	1.6358	1.7578
NaN	NaN	NaN	NaN	NaN	NaN	NaN	NaN	NaN	NaN	NaN	NaN	NaN	NaN	NaN	NaN	NaN	NaN	NaN	NaN	NaN	NaN	NaN	NaN	NaN	NaN	NaN	NaN	NaN	NaN	NaN	NaN	NaN	NaN	NaN	NaN	NaN	2.1896	NaN	NaN	NaN	NaN	NaN	NaN	NaN	NaN	NaN	NaN	NaN	NaN
0.98575	1.0975	0.91886	0.78913	0.89544	1.1871	0.97777	1.0087	0.99321	1.0214	1.0336	0.95945	1.0747	0.93605	1.45	1.0677	1.6601	0.97784	1.278	1.7445	1.129	1.4916	1.2722	1.8392	1.3126	1.4741	1.9465	1.6079	2.0281	2.3674	1.5167	1.7385	2.442	1.2547	1.4346	1.6213	1.1947	1.4691	1.5044	1.1977	0.94799	1.2813	1.3156	1.3518	1.2506	1.1494	1.0983	1.0619	1.4458	1.9734
NaN	NaN	1.0068	NaN	NaN	NaN	0.72616	1.1567	NaN	0.571	NaN	1.5002	NaN	NaN	NaN	0.68153	1.4996	1.3977	NaN	NaN	1.0472	0.82996	1.3385	0.86892	NaN	2.1594	1.4916	1.4802	NaN	1.412	NaN	NaN	NaN	NaN	1.4493	NaN	1.0239	NaN	NaN	NaN	1.5931	0.74291	NaN	0.42171	0.66606	0.89633	NaN	NaN	NaN	1.3872
0.77557	1.2844	1.0422	0.3485	1.4893	1.0487	0.99403	1.1305	0.30207	0.91834	1.3228	1.4032	1.3617	0.82818	1.1276	0.81988	1.8533	1.3149	1.4597	0.50834	1.058	0.82031	1.2907	0.92345	1.6192	1.912	1.5027	1.4729	1.4268	1.4022	2.3511	1.2464	1.2407	1.5084	1.3886	1.33	1.0508	1.07	1.0296	0.81633	1.1832	0.8033	0.98525	0.42778	0.91024	1.0151	1.3836	1.4957	1.2497	1.5132
NaN	NaN	NaN	NaN	NaN	NaN	1.0362	NaN	2.0389	NaN	NaN	0.25117	NaN	NaN	NaN	NaN	NaN	NaN	NaN	NaN	NaN	NaN	5.718	NaN	NaN	1.1719	NaN	NaN	NaN	5.6319	NaN	NaN	NaN	NaN	NaN	NaN	NaN	NaN	NaN	NaN	NaN	NaN	NaN	0.77624	NaN	NaN	0.61474	NaN	1.027	1.8887
NaN	NaN	NaN	NaN	NaN	NaN	NaN	NaN	NaN	NaN	NaN	NaN	NaN	NaN	NaN	NaN	NaN	NaN	NaN	NaN	NaN	NaN	NaN	NaN	NaN	NaN	NaN	NaN	NaN	NaN	NaN	NaN	NaN	NaN	NaN	NaN	NaN	NaN	NaN	NaN	NaN	NaN	NaN	NaN	NaN	NaN	NaN	NaN	NaN	NaN
0.72347	0.80525	1.1213	NaN	NaN	NaN	NaN	1.1357	0.75808	NaN	NaN	1.0069	NaN	NaN	0.68448	0.3552	NaN	0.20846	1.106	1.0874	NaN	1.4566	NaN	NaN	NaN	1.4034	1.5866	1.4654	2.8475	NaN	1.613	1.5707	1.585	1.8108	2.1952	NaN	0.76856	NaN	NaN	NaN	0.86134	NaN	NaN	NaN	1.1015	1.9029	0.82598	NaN	NaN	1.3206
0.96072	1.0063	0.76653	0.47283	0.81522	0.80757	0.71559	0.73284	0.67604	0.54659	0.74092	0.8644	0.58266	0.9152	0.43942	0.53722	1.1005	0.49265	1.0555	0.81772	1.0449	0.8301	1.2408	0.83974	1.1854	1.42	1.0758	1.0481	1.1484	1.2663	1.3313	1.1115	1.1242	1.1768	1.3389	1.0491	0.90365	0.89189	1.119	1.1711	0.83388	1.2723	1.037	1.6473	0.47107	0.97042	1.1079	1.3289	1.5362	1.5002
NaN	NaN	NaN	NaN	NaN	NaN	NaN	NaN	NaN	NaN	NaN	NaN	NaN	NaN	NaN	NaN	NaN	NaN	NaN	NaN	NaN	NaN	NaN	NaN	NaN	NaN	NaN	NaN	NaN	NaN	NaN	NaN	NaN	NaN	NaN	NaN	NaN	NaN	NaN	NaN	NaN	NaN	NaN	NaN	NaN	NaN	NaN	NaN	NaN	NaN
NaN	NaN	NaN	NaN	NaN	NaN	NaN	NaN	NaN	NaN	NaN	NaN	NaN	NaN	NaN	NaN	NaN	NaN	NaN	NaN	NaN	NaN	NaN	NaN	NaN	NaN	NaN	NaN	NaN	NaN	NaN	NaN	NaN	NaN	NaN	NaN	NaN	NaN	NaN	NaN	NaN	NaN	NaN	NaN	NaN	NaN	NaN	NaN	NaN	NaN
NaN	NaN	NaN	NaN	NaN	NaN	NaN	NaN	0.82108	NaN	NaN	NaN	NaN	NaN	0.87692	0.86986	NaN	NaN	NaN	NaN	NaN	NaN	NaN	NaN	2.145	2.0265	NaN	NaN	NaN	2.4883	NaN	NaN	NaN	NaN	NaN	NaN	NaN	NaN	NaN	NaN	1.1752	NaN	NaN	NaN	1.3086	NaN	NaN	2.3001	NaN	NaN
0.89257	1.2736	NaN	1.2491	0.91921	0.96816	0.89407	1.2879	0.82108	NaN	1.1585	1.1268	1.0692	NaN	NaN	NaN	NaN	1.1904	1.2158	NaN	1.4435	NaN	NaN	NaN	2.145	2.0265	2.3257	2.0067	1.8763	2.4883	2.3488	NaN	2.3039	2.2667	1.387	1.8224	NaN	1.3879	1.1844	1.5019	NaN	NaN	NaN	2.1034	1.3086	1.5393	1.6919	2.3001	2.8124	2.4063
NaN	1.7812	0.65372	NaN	NaN	NaN	NaN	NaN	0.84451	1.1537	NaN	NaN	1.2257	NaN	NaN	NaN	NaN	NaN	NaN	NaN	NaN	NaN	NaN	NaN	NaN	NaN	NaN	NaN	NaN	NaN	NaN	NaN	NaN	NaN	NaN	NaN	NaN	NaN	NaN	NaN	NaN	NaN	NaN	NaN	NaN	NaN	NaN	NaN	NaN	NaN
0.89049	1.0283	0.69583	0.67709	0.88993	0.64848	0.53282	0.7052	0.56547	0.49162	NaN	0.45377	NaN	NaN	NaN	NaN	NaN	NaN	NaN	1.304	NaN	1.4598	1.3545	NaN	1.8982	NaN	NaN	NaN	1.328	NaN	0.91009	NaN	NaN	NaN	NaN	NaN	NaN	NaN	NaN	NaN	NaN	NaN	NaN	0.63812	NaN	NaN	0.59004	NaN	0.67703	NaN
1.1099	1.0661	0.78834	0.75108	0.69852	0.58678	0.7224	0.75199	0.52932	0.50606	0.72526	0.39101	0.37814	0.39629	0.27455	0.18483	0.44366	0.1573	1.157	1.8976	1.36	1.4414	1.1085	1.2039	NaN	1.387	1.4696	1.4923	1.4625	1.3587	0.93584	0.96486	0.70119	0.64348	0.65138	0.59722	1.0631	0.90135	1.2003	0.91965	0.6857	0.86615	1.0295	0.92934	0.7153	0.5213	0.57698	0.72001	0.47899	0.61799
1.0422	1.2379	1.4888	0.30855	1.6382	1.0715	1.1863	1.1026	0.35706	0.95815	1.7321	1.4342	1.3974	1.2073	1.5722	0.60216	1.3236	0.62681	1.3212	0.53926	1.8183	1.0495	2.1908	1.0783	1.408	2.2849	1.0573	1.4599	1.8197	2.2495	1.8928	1.1813	0.82947	1.4631	1.3542	0.94814	0.79312	0.98717	0.73149	1.0654	0.76485	0.69496	0.80722	0.29016	0.848	0.751	0.56793	0.92524	1.2431	1.415
NaN	NaN	NaN	NaN	NaN	NaN	NaN	NaN	NaN	NaN	NaN	NaN	NaN	NaN	NaN	NaN	NaN	NaN	NaN	NaN	NaN	NaN	NaN	NaN	NaN	NaN	NaN	NaN	NaN	NaN	NaN	NaN	NaN	NaN	NaN	NaN	NaN	NaN	NaN	NaN	NaN	NaN	NaN	NaN	NaN	NaN	NaN	NaN	NaN	NaN
NaN	NaN	NaN	NaN	NaN	NaN	NaN	NaN	NaN	NaN	NaN	NaN	NaN	NaN	NaN	NaN	NaN	NaN	NaN	NaN	NaN	NaN	NaN	NaN	NaN	NaN	NaN	NaN	NaN	NaN	NaN	NaN	NaN	NaN	NaN	NaN	NaN	NaN	NaN	NaN	NaN	NaN	NaN	NaN	NaN	NaN	NaN	NaN	NaN	NaN
NaN	NaN	NaN	NaN	NaN	NaN	NaN	NaN	NaN	NaN	NaN	NaN	NaN	NaN	NaN	NaN	NaN	NaN	NaN	NaN	NaN	NaN	NaN	NaN	NaN	NaN	NaN	NaN	NaN	NaN	NaN	NaN	NaN	NaN	NaN	NaN	NaN	NaN	NaN	NaN	NaN	NaN	NaN	NaN	NaN	NaN	NaN	NaN	NaN	NaN
NaN	NaN	NaN	NaN	NaN	NaN	NaN	NaN	NaN	NaN	NaN	NaN	NaN	NaN	NaN	NaN	NaN	NaN	NaN	NaN	NaN	NaN	NaN	NaN	NaN	NaN	NaN	1.6008	NaN	NaN	NaN	NaN	NaN	NaN	NaN	NaN	NaN	NaN	NaN	NaN	NaN	NaN	NaN	NaN	NaN	NaN	NaN	NaN	NaN	NaN
NaN	NaN	NaN	NaN	NaN	NaN	NaN	NaN	NaN	NaN	NaN	NaN	NaN	NaN	NaN	NaN	NaN	NaN	NaN	NaN	NaN	NaN	NaN	NaN	NaN	2.2522	NaN	NaN	NaN	NaN	3.1115	NaN	NaN	NaN	NaN	NaN	NaN	NaN	NaN	NaN	NaN	NaN	NaN	NaN	NaN	NaN	NaN	NaN	NaN	NaN
0.84729	0.95941	0.62216	0.87877	0.30283	NaN	0.44136	0.67645	1.0475	NaN	0.47674	NaN	NaN	NaN	NaN	NaN	NaN	NaN	NaN	NaN	NaN	NaN	1.7507	1.9534	NaN	0.97587	1.2652	1.9519	1.739	1.5394	1.3562	NaN	NaN	NaN	NaN	NaN	NaN	NaN	NaN	NaN	NaN	NaN	NaN	NaN	NaN	NaN	NaN	NaN	NaN	NaN
NaN	NaN	NaN	NaN	NaN	NaN	NaN	NaN	NaN	NaN	NaN	NaN	NaN	NaN	NaN	NaN	NaN	NaN	NaN	NaN	NaN	NaN	NaN	NaN	NaN	NaN	NaN	NaN	NaN	NaN	NaN	NaN	NaN	NaN	NaN	NaN	NaN	NaN	NaN	NaN	NaN	NaN	NaN	NaN	NaN	NaN	NaN	NaN	NaN	NaN
NaN	NaN	NaN	NaN	NaN	NaN	NaN	NaN	NaN	NaN	NaN	NaN	NaN	NaN	NaN	NaN	NaN	NaN	NaN	NaN	NaN	NaN	NaN	NaN	NaN	NaN	NaN	NaN	NaN	NaN	NaN	NaN	NaN	NaN	NaN	NaN	NaN	NaN	NaN	NaN	NaN	NaN	NaN	NaN	NaN	NaN	NaN	NaN	NaN	NaN
0.7757	1.4608	1.0065	0.91669	0.96977	1.0539	0.97065	0.99269	0.78562	0.9043	0.95594	0.95472	1.1581	1.1486	0.82594	0.75261	1.2766	0.67186	1.463	1.8794	1.1137	1.1668	1.8251	1.4304	1.6944	1.5847	1.7018	1.8107	1.9409	1.631	2.0811	1.6094	1.5657	2.0279	1.1373	1.1422	1.0053	1.6467	1.1424	1.2072	1.0525	1.1717	1.2711	2.076	1.8955	2.1596	1.1087	1.6129	1.9854	1.6377
NaN	NaN	NaN	2.6606	NaN	NaN	NaN	NaN	0.67424	1.1677	NaN	NaN	2.7574	NaN	NaN	NaN	NaN	NaN	0.71287	NaN	1.4711	0.93352	NaN	NaN	NaN	NaN	3.8264	2.2297	NaN	NaN	3.952	3.4626	2.0734	NaN	NaN	NaN	0.46737	2.7333	NaN	NaN	1.2324	2.2056	0.69256	1.6207	1.9841	2.8361	0.89755	3.679	NaN	1.3025
0.98473	2.213	1.6265	2.0465	1.751	1.8744	1.76	2.8804	2.1832	2.412	1.5857	1.5794	2.6	2.6857	1.8834	1.3198	1.9188	0.46255	1.0818	3.0912	1.1901	1.0499	3.18	3.7161	3.4456	3.7583	3.8264	2.6168	2.3251	2.5131	2.534	3.5386	4.2208	3.086	1.5227	2.0484	1.2456	2.7333	1.2612	1.5285	1.323	1.8769	1.8394	3.098	3.7886	2.8285	1.4092	1.5319	2.5631	2.7014
NaN	NaN	NaN	1.1232	NaN	1.9428	1.1238	NaN	1.056	0.98428	1.3567	0.68019	0.70666	NaN	NaN	NaN	NaN	NaN	NaN	NaN	1.681	NaN	NaN	NaN	NaN	NaN	2.2619	NaN	NaN	NaN	NaN	NaN	NaN	1.0809	NaN	NaN	1.031	NaN	NaN	NaN	NaN	1.4951	NaN	NaN	NaN	NaN	NaN	NaN	NaN	NaN
1.0108	1.1578	0.89425	1.1432	0.7042	0.79116	0.63782	0.66576	0.59081	0.46404	0.36504	0.16944	0.18896	0.08098	0.072594	0.22999	0.38274	0.3584	1.3932	2.6068	0.96438	0.95006	1.8497	1.9349	1.4268	1.3635	1.3218	1.2276	1.2155	0.69356	0.26822	0.19896	0.17061	NaN	NaN	NaN	1.0046	1.4174	0.9895	1.0507	0.85612	1.0752	1.0094	1.3111	1.1333	0.62046	0.62526	0.29526	0.16322	0.12504
NaN	NaN	NaN	NaN	NaN	NaN	NaN	NaN	NaN	NaN	NaN	NaN	NaN	NaN	NaN	NaN	NaN	NaN	NaN	NaN	1.2033	NaN	NaN	NaN	NaN	NaN	NaN	1.9243	1.6554	NaN	NaN	NaN	NaN	NaN	NaN	NaN	NaN	NaN	1.3425	1.2063	NaN	1.315	NaN	NaN	NaN	NaN	NaN	NaN	NaN	NaN
1.0339	1.2126	0.68176	0.80306	0.90349	0.93368	0.86731	1.1106	0.92517	1.0489	1.0555	1.0918	1.0653	0.95612	0.63347	0.35005	0.57586	0.19602	1.5435	1.9593	0.90834	0.86255	2.1063	2.0194	1.7151	1.942	1.7293	1.7728	1.4142	1.7723	2.1872	2.3149	1.4618	1.3748	0.55489	0.7716	0.94046	1.5357	0.68665	0.7976	1.0276	1.045	0.93538	0.84947	0.94122	0.98743	1.0111	1.3528	1.2897	1.2544
NaN	NaN	NaN	NaN	NaN	NaN	NaN	NaN	NaN	NaN	NaN	NaN	NaN	NaN	NaN	NaN	NaN	NaN	NaN	NaN	NaN	NaN	NaN	NaN	NaN	NaN	NaN	NaN	NaN	NaN	NaN	NaN	NaN	NaN	NaN	NaN	NaN	1.3439	NaN	NaN	NaN	NaN	NaN	NaN	NaN	NaN	NaN	NaN	NaN	NaN
NaN	NaN	NaN	NaN	0.92051	NaN	NaN	NaN	NaN	NaN	NaN	NaN	NaN	NaN	NaN	NaN	NaN	NaN	NaN	NaN	NaN	NaN	NaN	NaN	NaN	NaN	NaN	NaN	NaN	NaN	NaN	NaN	NaN	NaN	NaN	NaN	NaN	NaN	NaN	NaN	NaN	NaN	NaN	NaN	NaN	NaN	NaN	NaN	NaN	NaN
NaN	NaN	NaN	NaN	NaN	NaN	NaN	NaN	NaN	NaN	NaN	NaN	NaN	NaN	NaN	NaN	NaN	NaN	NaN	NaN	NaN	NaN	NaN	NaN	NaN	NaN	NaN	NaN	NaN	NaN	NaN	NaN	NaN	NaN	NaN	NaN	NaN	NaN	NaN	NaN	NaN	NaN	NaN	NaN	NaN	NaN	NaN	NaN	NaN	NaN
1.0272	0.98473	0.6453	NaN	NaN	NaN	1.4422	NaN	NaN	NaN	NaN	NaN	NaN	NaN	NaN	NaN	NaN	NaN	NaN	NaN	NaN	NaN	NaN	NaN	NaN	NaN	NaN	NaN	1.3123	NaN	NaN	NaN	NaN	NaN	NaN	NaN	NaN	NaN	NaN	NaN	NaN	NaN	NaN	NaN	NaN	NaN	NaN	NaN	NaN	NaN
NaN	NaN	NaN	NaN	NaN	NaN	NaN	NaN	NaN	0.60387	NaN	NaN	NaN	NaN	NaN	NaN	NaN	NaN	NaN	NaN	NaN	NaN	NaN	NaN	NaN	NaN	NaN	NaN	NaN	NaN	NaN	NaN	NaN	NaN	NaN	NaN	NaN	NaN	NaN	NaN	NaN	NaN	NaN	NaN	NaN	NaN	NaN	NaN	NaN	NaN
NaN	1.1601	NaN	NaN	NaN	0.66378	NaN	1.5264	NaN	1.2265	NaN	NaN	NaN	NaN	5.7035	NaN	NaN	NaN	NaN	NaN	NaN	NaN	NaN	NaN	NaN	NaN	NaN	NaN	NaN	NaN	NaN	NaN	NaN	NaN	NaN	NaN	1.0664	NaN	NaN	1.5465	1.2928	NaN	1.1668	0.63725	NaN	1.459	NaN	4.6304	4.1742	5.3978
1.0195	1.0029	0.87251	0.71155	0.82955	0.73676	0.67719	0.79555	0.64799	0.547	0.65541	0.45677	0.26899	0.24013	0.17367	0.1708	NaN	NaN	1.4713	1.7863	0.79767	1.1385	1.916	1.9741	1.6529	1.6815	1.6074	1.5369	1.1362	1.0469	0.94121	0.63154	0.38098	0.30784	0.14906	0.19767	0.86437	1.3423	0.75484	0.90689	1.0756	1.0005	0.85064	0.9449	0.85711	0.63454	0.77663	0.55359	0.40644	0.30353
0.97825	1.1638	0.6261	0.72241	0.71423	0.80125	0.58264	0.68734	0.49381	0.37451	0.40885	0.22554	0.14322	0.11547	0.086981	0.052045	0.091945	0.048128	1.3109	2.2429	0.87261	0.72873	2.3313	1.8563	1.511	1.6587	1.6084	1.4419	0.88086	0.61432	0.43255	0.29766	0.21942	0.18237	0.10904	0.16307	0.98815	1.4028	0.70309	0.84643	1.0982	1.0812	0.66264	0.70015	0.66577	0.49399	0.53509	0.35672	0.29675	0.24251
1.4339	0.87255	0.38507	0.55981	NaN	0.5174	0.453	0.36204	0.29436	NaN	0.31696	0.20402	NaN	NaN	NaN	NaN	NaN	NaN	1.2737	1.5928	1.0578	0.55149	1.2489	1.0826	0.82983	1.1248	0.93544	0.75901	NaN	0.47044	0.47932	NaN	NaN	0.39541	NaN	NaN	1.1394	1.0312	NaN	1.1154	1.2383	0.54623	0.5344	0.501	NaN	NaN	NaN	NaN	NaN	NaN
NaN	1.2496	1.1733	NaN	1.0601	1.2426	NaN	1.238	0.779	0.86142	0.69318	NaN	0.87543	0.63544	NaN	NaN	NaN	NaN	NaN	NaN	NaN	NaN	NaN	NaN	NaN	NaN	NaN	NaN	NaN	NaN	NaN	NaN	NaN	NaN	NaN	NaN	NaN	NaN	NaN	NaN	NaN	NaN	NaN	NaN	NaN	NaN	1.4984	1.0366	NaN	0.93446
1.055	1.8189	0.6774	NaN	NaN	NaN	NaN	NaN	NaN	0.56109	NaN	NaN	0.72996	0.87429	NaN	NaN	NaN	0.54756	NaN	NaN	NaN	0.73254	NaN	NaN	NaN	NaN	NaN	NaN	NaN	NaN	1.6202	0.82928	NaN	NaN	NaN	NaN	NaN	NaN	0.83692	NaN	1.1943	NaN	NaN	0.51977	0.62765	NaN	NaN	NaN	NaN	NaN
NaN	NaN	NaN	NaN	NaN	NaN	NaN	NaN	NaN	NaN	NaN	NaN	NaN	NaN	NaN	NaN	NaN	NaN	NaN	NaN	NaN	NaN	NaN	NaN	8.1371	9.8268	NaN	NaN	NaN	NaN	12.81	NaN	11.659	NaN	NaN	NaN	NaN	NaN	NaN	NaN	3.5697	4.7478	3.6579	4.7685	4.8241	5.8268	7.7224	6.4556	NaN	6.0356
1.2189	1.1307	0.83172	1.2245	1.7212	2.2338	2.204	2.9574	3.0298	2.916	4.0754	4.389	3.912	4.5718	3.5417	2.623	4.0762	1.4103	1.3256	2.0625	1.0794	1.0578	2.5207	2.736	3.2908	3.603	4.0768	6.4185	5.1414	7.3434	8.7722	NaN	8.2296	NaN	5.1016	5.2892	1.1834	1.4309	1.1321	1.6229	1.982	2.0738	1.829	2.1201	2.057	3.1903	3.6796	4.8712	4.2843	4.8196
NaN	NaN	NaN	NaN	NaN	NaN	NaN	NaN	NaN	NaN	NaN	NaN	NaN	NaN	1.0345	NaN	0.71575	NaN	1.3756	2.1193	0.81331	NaN	NaN	NaN	1.0226	2.2059	NaN	NaN	NaN	1.1111	NaN	NaN	NaN	NaN	NaN	NaN	NaN	NaN	0.99466	NaN	1.1341	NaN	NaN	NaN	NaN	NaN	2.3287	NaN	NaN	NaN
0.88448	1.3352	0.99611	1.579	2.9887	2.9077	1.2901	1.2696	1.1268	1.2884	1.362	1.3591	1.3981	0.96004	NaN	NaN	0.78012	0.22651	1.4822	1.4871	NaN	1.3717	1.8162	2.645	1.2568	2.6226	2.4085	2.5206	1.0134	3.1234	2.7526	1.5055	1.5087	1.038	0.87218	0.70781	0.79347	1.3266	1.1378	1.4947	1.3487	0.98825	3.6416	1.5512	2.6167	0.64984	1.6719	0.58877	1.8805	1.7786
0.99788	NaN	1.3466	NaN	1.3423	1.3432	1.6972	NaN	NaN	NaN	NaN	1.5217	NaN	NaN	NaN	NaN	NaN	NaN	NaN	1.6185	NaN	NaN	NaN	NaN	2.1142	NaN	NaN	NaN	NaN	NaN	NaN	NaN	NaN	NaN	NaN	NaN	NaN	NaN	NaN	1.0941	NaN	NaN	NaN	NaN	NaN	3.5644	NaN	NaN	NaN	NaN
NaN	NaN	NaN	0.99051	NaN	NaN	NaN	NaN	NaN	NaN	NaN	NaN	NaN	NaN	NaN	NaN	NaN	NaN	NaN	NaN	NaN	NaN	NaN	NaN	NaN	NaN	NaN	NaN	NaN	NaN	NaN	NaN	NaN	NaN	NaN	NaN	NaN	NaN	NaN	NaN	NaN	NaN	NaN	NaN	NaN	NaN	NaN	NaN	NaN	NaN
NaN	NaN	NaN	NaN	NaN	NaN	NaN	NaN	NaN	NaN	NaN	NaN	NaN	NaN	NaN	NaN	NaN	NaN	NaN	NaN	NaN	NaN	1.9109	NaN	NaN	NaN	NaN	NaN	NaN	NaN	NaN	NaN	NaN	NaN	NaN	NaN	NaN	NaN	NaN	NaN	NaN	NaN	NaN	NaN	NaN	NaN	NaN	NaN	NaN	NaN
NaN	1.199	0.69587	1.0031	0.93024	0.77247	0.69674	0.91016	0.73958	0.81061	0.79458	0.85034	1.0122	0.78645	0.8706	0.63162	1.3791	0.5454	1.2375	2.0288	1.0439	0.90789	1.6237	1.5905	1.2906	1.4803	1.5287	1.4947	1.4984	2.0035	1.8098	2.1716	1.79	1.6027	1.4027	1.4907	0.98828	1.2085	0.83989	0.95689	1.2392	1.4111	0.89558	1.0454	0.81582	0.63423	1.079	1.2305	1.6343	2.1681
0.93189	NaN	0.7529	NaN	NaN	NaN	0.64129	0.97977	NaN	NaN	NaN	0.69445	0.40806	0.2966	0.17903	NaN	NaN	NaN	1.2965	1.6691	1.4907	NaN	NaN	NaN	NaN	1.8857	NaN	NaN	NaN	NaN	NaN	NaN	NaN	NaN	0.53049	NaN	NaN	1.277	NaN	NaN	NaN	1.3859	NaN	0.53317	NaN	NaN	NaN	NaN	NaN	0.34584
1.02	1.2186	1.1914	0.98187	1.0939	1.1138	0.86575	0.97024	0.86947	0.51467	0.8395	0.69925	0.44882	0.39185	0.23849	0.16637	0.31164	0.080826	1.2709	2.1037	1.7933	1.6041	1.7304	1.6819	0.94373	0.50326	1.7311	1.9498	1.5411	1.1466	1.1311	0.73981	0.47588	0.26955	0.32249	0.22454	0.98531	1.2978	0.65094	0.93802	1.2052	0.98993	0.97235	0.99911	0.70731	0.70227	0.47349	0.35794	0.55271	0.51499
NaN	1.4317	0.63055	NaN	1.1894	NaN	0.8907	NaN	0.69781	1.6431	0.99328	NaN	NaN	0.2756	0.26174	NaN	NaN	NaN	NaN	1.304	1.2039	0.81333	NaN	NaN	NaN	NaN	NaN	NaN	2.1734	3.0202	10.934	0.58583	NaN	0.17384	NaN	NaN	0.99982	NaN	NaN	NaN	1.4659	NaN	NaN	NaN	NaN	NaN	NaN	2.9667	NaN	NaN
0.93852	1.1752	0.63055	0.89133	1.1878	1.1348	1.106	1.8725	1.2919	1.6431	2.2925	4.5922	4.3289	4.0093	3.7487	2.6717	4.2329	1.4384	0.92253	NaN	1.2039	0.81333	1.8936	1.6885	2.4359	1.8412	2.2853	3.4599	1.2099	6.1527	1.0428	0.58151	4.37	0.17384	5.7476	5.6301	0.99982	1.4079	0.65743	1.026	1.4659	0.96741	0.85462	1.0669	1.2797	2.0246	1.8313	0.48083	4.9258	3.1992
0.94927	1.0727	0.69262	0.77405	0.78392	0.68478	0.71385	0.98183	0.83292	0.80837	NaN	NaN	0.86316	0.80071	0.42565	0.30782	0.63582	0.2799	NaN	NaN	NaN	NaN	NaN	NaN	NaN	NaN	NaN	NaN	NaN	NaN	NaN	NaN	NaN	NaN	NaN	NaN	0.939	NaN	0.76438	1.455	1.5978	0.88904	0.85924	0.79659	1.1299	1.4066	0.98675	0.93281	1.1183	0.82754
NaN	NaN	NaN	NaN	NaN	NaN	NaN	NaN	NaN	NaN	NaN	NaN	NaN	NaN	NaN	NaN	NaN	NaN	NaN	NaN	NaN	NaN	NaN	NaN	NaN	NaN	NaN	NaN	NaN	NaN	NaN	NaN	NaN	NaN	NaN	NaN	NaN	NaN	NaN	NaN	NaN	NaN	NaN	NaN	NaN	NaN	NaN	NaN	NaN	NaN
NaN	NaN	NaN	NaN	NaN	NaN	NaN	NaN	NaN	NaN	NaN	NaN	NaN	NaN	NaN	NaN	NaN	NaN	NaN	NaN	NaN	NaN	NaN	NaN	NaN	NaN	NaN	NaN	NaN	NaN	NaN	NaN	NaN	NaN	NaN	NaN	NaN	NaN	NaN	NaN	NaN	NaN	NaN	NaN	NaN	NaN	NaN	NaN	NaN	NaN
0.96046	1.1212	0.76492	1.6685	2.586	3.4261	3.7121	4.4253	4.9149	4.612	4.7087	5.2504	3.6468	3.9661	2.6822	1.4827	2.35	0.72327	1.3401	2.2727	1.1003	1.2483	3.1511	2.3787	4.8262	6.6537	7.1048	9.3226	8.5993	10.958	8.7323	NaN	7.3095	5.181	2.9711	2.8712	0.91157	1.564	1.2304	1.7739	2.7784	4.0945	4.0356	4.2994	4.0002	4.9114	1.8505	5.8666	5.1798	4.9148
1.0401	1.0697	0.68308	0.76307	0.76374	0.77118	0.5993	0.62447	0.4625	0.39963	0.43329	0.25797	0.1445	0.093544	0.059713	0.019986	NaN	NaN	1.3286	1.8438	1.1214	1.0908	1.6422	1.7387	1.4279	1.3847	1.2424	1.1113	0.84278	0.55795	0.34275	0.18422	0.11368	0.054204	0.021898	0.020711	1.0297	1.2879	0.79328	0.88502	0.92618	0.90576	0.73951	0.69432	0.56723	0.50034	0.55138	0.29063	0.1667	0.12573
0.93277	1.2156	0.7176	1.0157	1.3827	1.7032	1.7333	2.1271	1.8842	1.8883	2.323	2.2653	1.9651	1.9937	1.4857	0.85521	1.5267	0.41529	1.2747	2.069	1.8449	1.0357	2.2627	2.8594	2.8323	3.5362	3.13	5.3019	3.8655	5.302	4.2644	4.4827	4.0942	3.0979	1.6729	1.8967	0.92758	1.1291	0.85778	1.2165	1.5449	1.928	1.5941	1.7656	1.825	2.4324	2.7965	3.0099	2.8378	2.5113
1.046	0.95162	1.2569	1.235	0.47529	NaN	0.8051	1.0139	0.45447	NaN	NaN	NaN	NaN	NaN	NaN	NaN	NaN	NaN	NaN	2.0278	1.0967	0.71257	NaN	2.4273	1.5333	1.3353	NaN	NaN	1.4078	1.2406	1.1243	0.91963	NaN	1.9184	2.0698	NaN	NaN	NaN	NaN	NaN	NaN	NaN	NaN	NaN	NaN	NaN	NaN	NaN	NaN	NaN
0.87309	0.93291	0.89465	0.87743	0.83869	0.81862	0.69648	0.68023	1.1183	0.63396	0.46857	0.36769	0.24535	0.12511	0.09343	0.030576	0.04278	NaN	1.2594	0.98196	1.3229	1.1408	1.7019	1.5798	1.3244	1.4484	1.2522	NaN	1.2051	0.8082	0.7636	0.43478	0.19696	0.096485	0.049646	0.025547	0.91532	1.1417	0.95856	0.99506	0.988	0.77617	1.0577	1.2895	0.74708	0.67232	0.83065	0.54825	0.41342	0.23456
NaN	0.86106	0.99388	0.62958	0.99537	0.68292	0.69302	NaN	0.38973	0.45803	0.51862	NaN	NaN	NaN	NaN	NaN	NaN	NaN	NaN	1.13	1.6847	NaN	1.3368	NaN	1.275	1.2281	NaN	1.0908	NaN	0.83001	0.59281	0.27475	0.37616	0.098872	NaN	NaN	NaN	0.94999	0.97803	NaN	0.97606	0.87186	0.91293	0.69301	0.62741	0.63537	0.5783	0.37739	0.25898	NaN
NaN	NaN	NaN	NaN	NaN	NaN	NaN	NaN	NaN	NaN	NaN	NaN	NaN	NaN	NaN	NaN	NaN	NaN	NaN	NaN	NaN	NaN	0.9915	0.9109	1.0852	0.66575	1.02	NaN	0.48159	0.46562	0.28353	NaN	NaN	NaN	NaN	NaN	NaN	NaN	NaN	NaN	NaN	NaN	NaN	NaN	0.88615	NaN	NaN	NaN	0.25039	NaN
NaN	NaN	NaN	NaN	NaN	NaN	NaN	NaN	NaN	NaN	NaN	1.3025	1.259	NaN	NaN	0.73878	NaN	NaN	NaN	NaN	NaN	NaN	NaN	NaN	NaN	NaN	2.1815	NaN	NaN	1.8172	NaN	NaN	NaN	NaN	NaN	NaN	NaN	1.723	NaN	1.1711	NaN	NaN	NaN	NaN	NaN	NaN	NaN	NaN	NaN	NaN
0.99113	1.3076	0.83265	1.0711	1.0894	1.1296	1.0813	1.2408	1.1076	1.0063	0.93623	1.3098	1.2852	1.3612	1.0006	0.81326	1.5074	0.89326	1.4414	2.4313	1.0571	0.8653	2.6875	2.3541	2.2596	2.0513	2.3577	2.1143	1.6437	1.9272	2.6091	2.9355	2.3125	2.1418	1.5254	2.1591	0.98222	1.7827	1.0042	NaN	1.2771	1.9184	1.1803	1.2506	1.332	1.5283	1.6269	1.9485	1.8022	1.8689
1.3608	1.9978	1.0183	NaN	1.4148	NaN	1.071	1.4459	NaN	NaN	1.1225	1.3845	NaN	NaN	0.80211	0.55325	1.0645	NaN	1.5635	1.5546	1.646	1.1365	NaN	1.9134	1.6906	2.208	1.5364	2.0246	1.2761	1.685	1.867	1.9244	1.7406	1.5158	NaN	1.1781	0.90744	1.0077	0.81619	1.046	1.1886	0.99603	NaN	0.86274	0.81358	NaN	NaN	1.3816	1.247	1.0365
NaN	NaN	NaN	1.2576	NaN	NaN	NaN	NaN	NaN	NaN	NaN	1.3845	NaN	1.0141	NaN	NaN	NaN	NaN	NaN	NaN	NaN	NaN	NaN	NaN	NaN	NaN	NaN	NaN	1.7388	2.2734	2.2358	NaN	NaN	1.798	1.2126	NaN	1.5951	NaN	1.2141	1.6373	1.8314	1.5546	NaN	1.3941	NaN	NaN	1.4374	NaN	NaN	1.4206
NaN	NaN	0.91326	0.56683	NaN	NaN	0.563	0.45145	NaN	NaN	NaN	NaN	NaN	NaN	0.084912	NaN	NaN	NaN	1.7444	0.95145	NaN	1.393	1.4359	1.281	1.3198	0.87374	NaN	0.63996	0.66412	0.51207	NaN	NaN	NaN	NaN	NaN	NaN	0.9456	1.0165	NaN	NaN	NaN	NaN	NaN	NaN	NaN	0.2921	NaN	NaN	NaN	0.11939
[truncated: 13,328 more rows]
[truncated: 34 more columns]

## Sheet: Filtered & replaced Con vs 1CAC
Ratio H/L siControl 00 min	Ratio H/L siControl 01 min	Ratio H/L siControl 02 min	Ratio H/L siControl 03 min	Ratio H/L siControl 04 min	Ratio H/L siControl 05 min	Ratio H/L siControl 06 min	Ratio H/L siControl 07 min	Ratio H/L siControl 08 min	Ratio H/L siControl 09 min	Ratio H/L siControl 10 min	Ratio H/L siControl 15 min	Ratio H/L siControl 20 min	Ratio H/L siControl 25 min	Ratio H/L siControl 30 min	Ratio H/L siControl 40 min	Ratio H/L siControl 50 min	Ratio H/L siControl 60 min	Ratio H/L siPPP1CA/C 00 min	Ratio H/L siPPP1CA/C 01 min	Ratio H/L siPPP1CA/C 02 min	Ratio H/L siPPP1CA/C 03 min	Ratio H/L siPPP1CA/C 04 min	Ratio H/L siPPP1CA/C 05 min	Ratio H/L siPPP1CA/C 06 min	Ratio H/L siPPP1CA/C 07 min	Ratio H/L siPPP1CA/C 08 min	Ratio H/L siPPP1CA/C 09 min	Ratio H/L siPPP1CA/C 10 min	Ratio H/L siPPP1CA/C 15 min	Ratio H/L siPPP1CA/C 20 min	Ratio H/L siPPP1CA/C 25 min	Ratio H/L siPPP1CA/C 30 min	Ratio H/L siPPP1CA/C 40 min	Ratio H/L siPPP1CA/C 50 min	Ratio H/L siPPP1CA/C 60 min	Amino Acid	Charge	Reverse	Potential contaminant	Localization prob	PEP	Score	Delta score	Score for localization	Mass error [ppm]	Intensity	Intensity L	Intensity H	Position
[truncated: 10,677 more rows]
[truncated: 19 more columns]

[truncated: 10 more sheets: Cross-mixed Con vs 1CAC, siCon vs 1CAC Clustering Output, siCon vs 1CAC Cluster Half-live, siCon vs si1CAC SP_TP counts, Figure 7-figure supplement 1, Candidate Mitotic PP1 substrate, Filtered & replaced Con vs 1CB, Cross-mixed Con vs 1CB, siCon vs 1CB Clustering Output, siCon vs 1CB Cluster Half-lives]
