# Supplementary material for: Ordered dephosphorylation initiated by the selective proteolysis of cyclin B drives mitotic exit
Source: eLife journal article supplement (doi:10.7554/elife.59885), 2020-09-01
Supplement: supp [file elife-59885-supp-v1.zip]

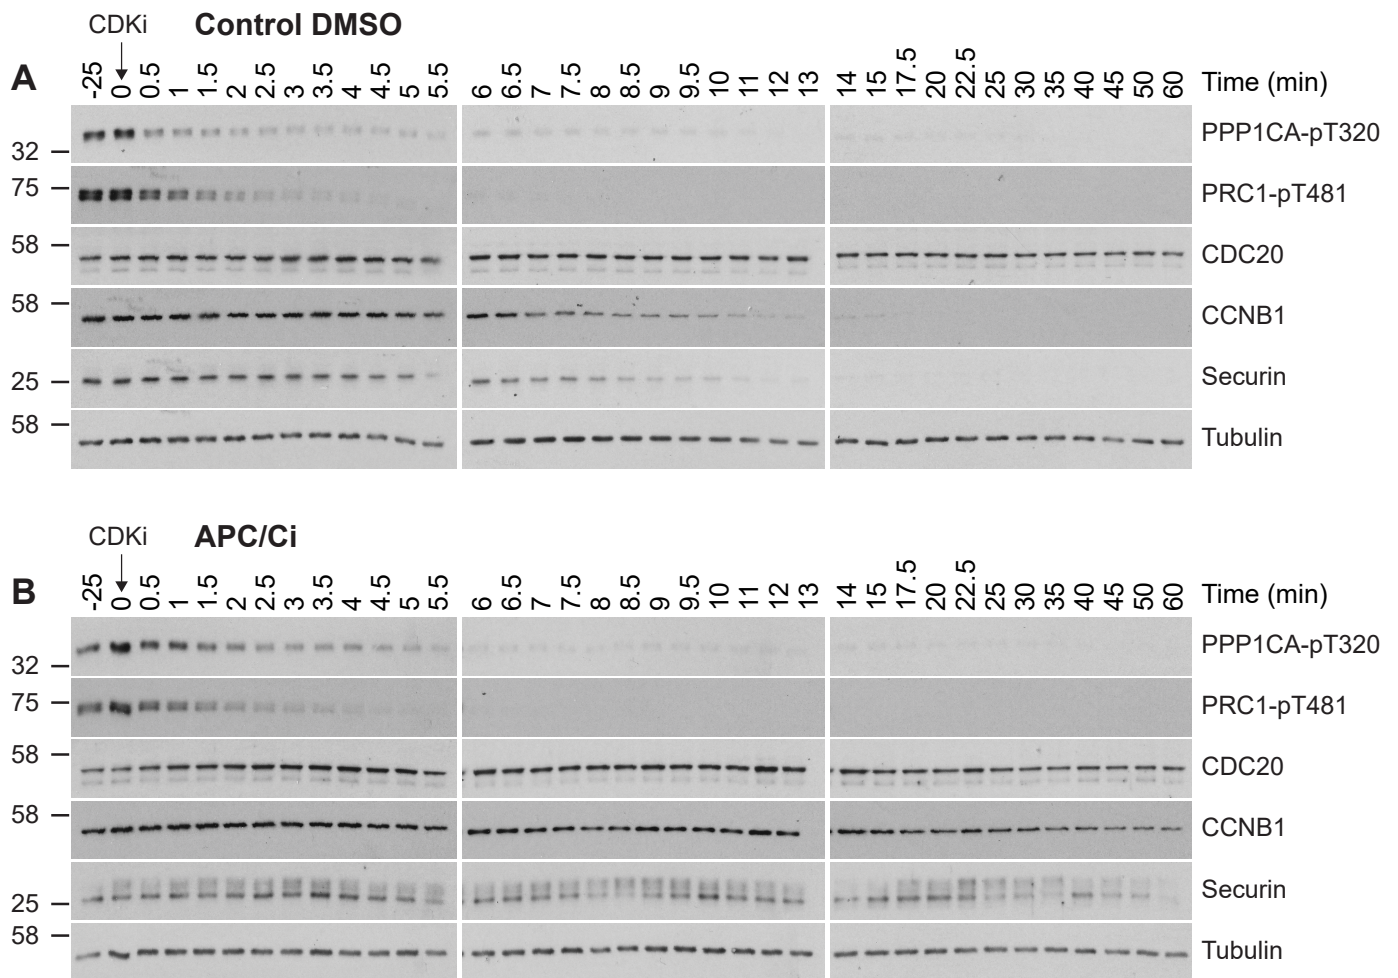

**Figure 6-figure supplement 1. High-resolution analysis of mitotic exit following APC/C inhibition**
