# Supplementary figures and images for: Ordered dephosphorylation initiated by the selective proteolysis of cyclin B drives mitotic exit
Source: eLife journal article supplement (doi:10.7554/elife.59885), 2020-09-01

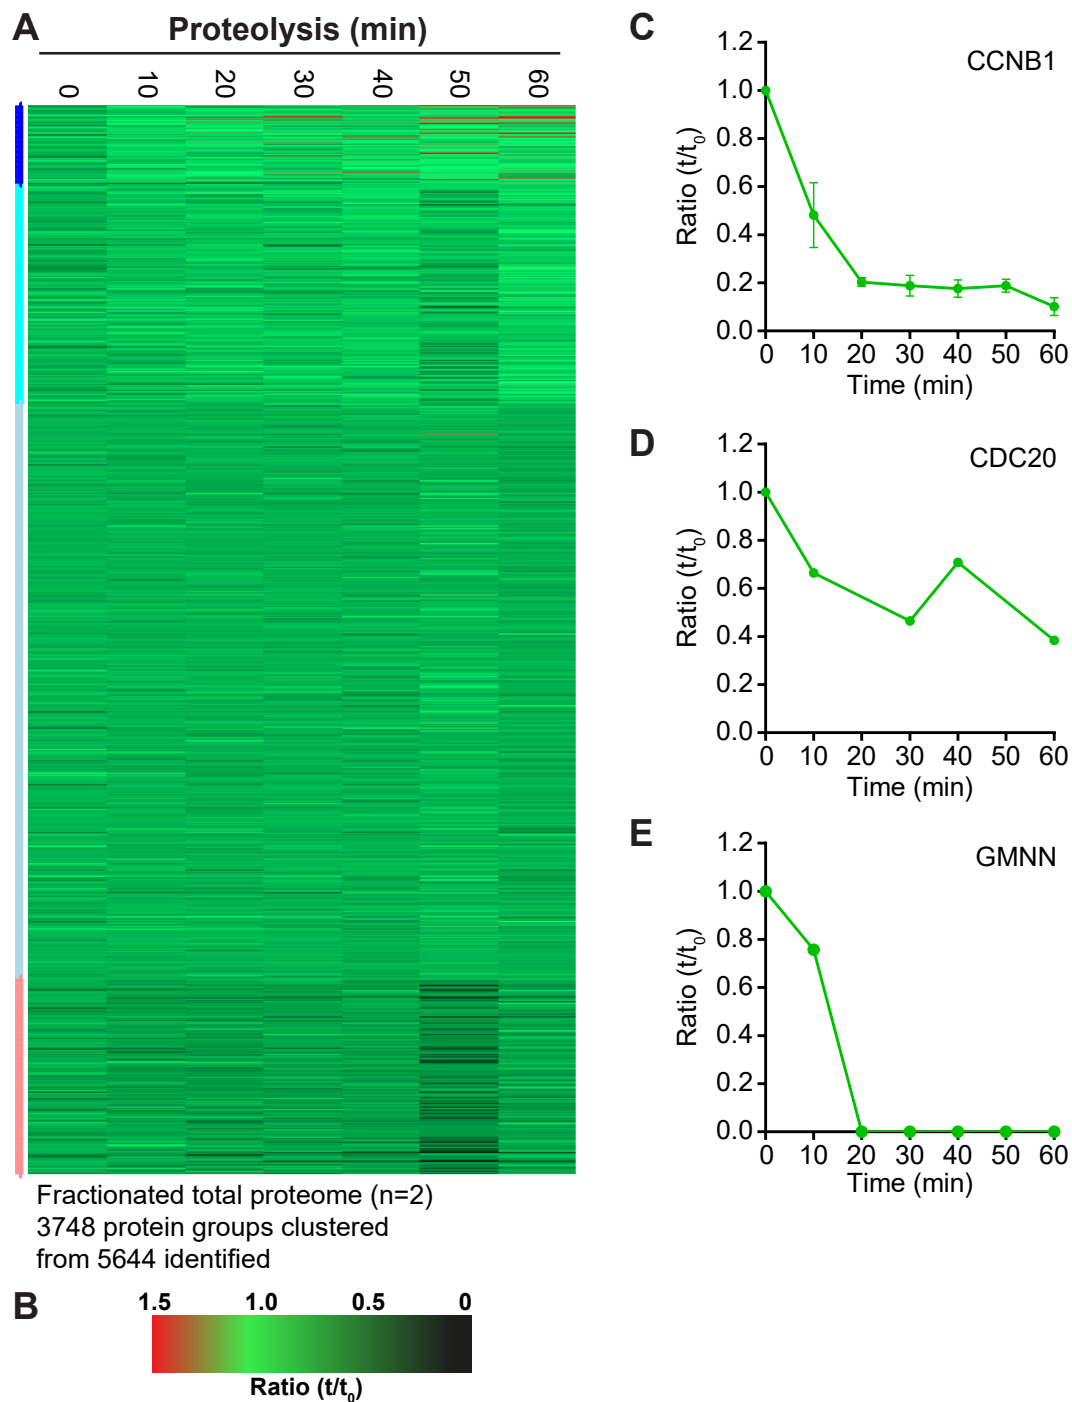

Supplement: supp [file elife-59885-supp-v1.zip]

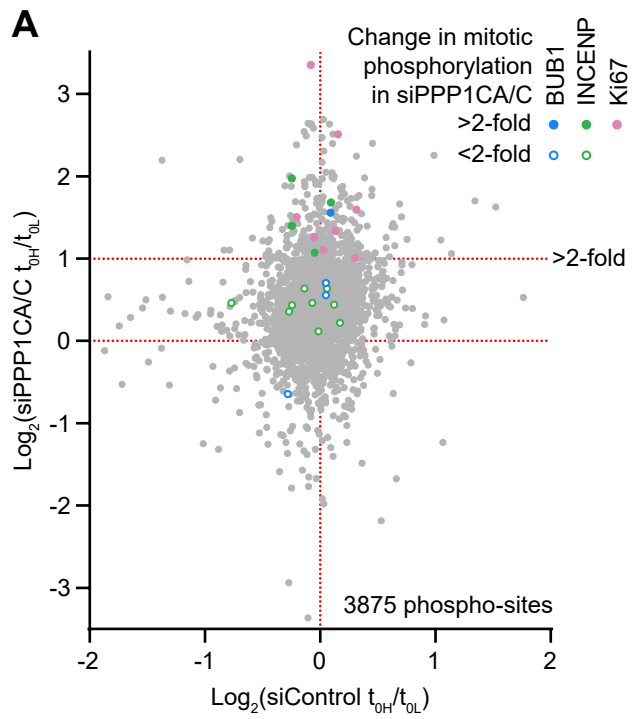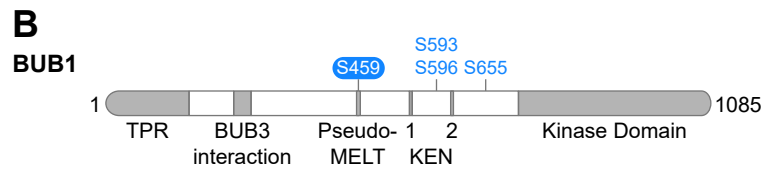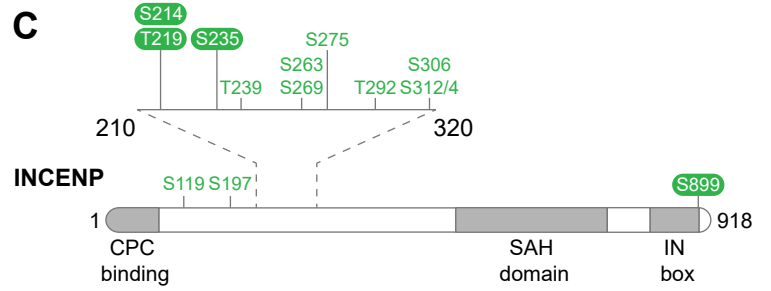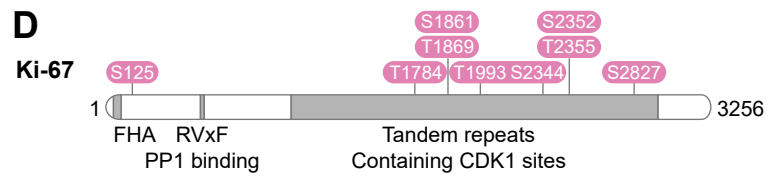

Supplement: supp [file elife-59885-supp-v1.zip]
